# Supplementary material for: Metagenomics provides broad detection of pathogens, antimicrobial resistance, and virulence genes in pig diarrhoea and complement conventional methods
Source: Research Square preprint supplement (doi:10.21203/rs.3.rs-8285969/v1), 2025-12-19
Supplement: Supplementary file 1 [file 3ffa2188fb05f1115c6295b0.xlsx]

## Sheet: Sheet1
Table 1: Diarrhoeal pig samples included in this study and haemolytic E. coli and C. perfringens isolates recovered from them. qPCR Ct values for detection of E. coli F4 and F18, B. pilosicoli and L. intracellularis are included in the table.
Sample ID	Cultured isolates		qPCR				Age of pig*
	Escherichia coli	Clostridium perfringens	(Ct value)
			E. coli F4	E. coli F18	B. pilosicoli	L. intracellularis
LVK 8				29	23	22	slaughtering pig
LVK 11	x (l)	x	21	21		32	weaner pig
LVK 17	x (l)		24	28	23	24	weaner pig
LVK 18			26	29	23	23	weaner pig
LVK 42	x (d)		33	34	26		slaughtering pig
LVK 43	x (l)	x	19	17		25	weaner pig
LVK 48	x (d) x (l)		26	22			weaner pig
LVK 52	x (d)	x				27	slaughtering pig
LVK 56	x (d)		15	18			weaner pig
LVK 60	x (d) x (l)	x	21	15			slaughtering pig
LVK 61	x (l)	x	31	31			weaner pig
LVK 73				25	27	22	slaughtering pig
LVK 74	x (l)		26	28			weaner pig
LVK 76	x (d)			22		21	slaughtering pig
LVK 79	x (d)				27	24	slaughtering pig
LVK 80	x (d) x (l)		20	20	23		weaner pig
LVK 82	x (d)		20	15	26	24	weaner pig
LVK 83	x (d) x (l)	x	23	16	22	29	weaner pig
LVK 88	x (d)				27		slaughtering pig
LVK 94	x (l)	x	21	20			weaner pig
LVK 97	x (l)	x	20	17			weaner pig
LVK 98	x (l)			30		24	slaughtering pig
LVK 101	x (d)		31	24	22		weaner pig
LVK 102	x (l)	x	27		27		weaner pig
LVK 103	x (l)			31	25		weaner pig
LVK 107			30		29	28	slaughtering pig
*Weaner pig: 3-6 weeks old, weight 7-20 kg; slaughtering pig: 10-14 weeks old, weight 30-50 kg
l: E. coli isolate recovered by LVK.
d: E. coli isolate recovered by DTU.
Ct value was considered positive when ≤ 35.
