# Supplementary material for: Metagenomics provides broad detection of pathogens, antimicrobial resistance, and virulence genes in pig diarrhoea and complement conventional methods
Source: Research Square preprint supplement (doi:10.21203/rs.3.rs-8285969/v1), 2025-12-19
Supplement: Supplementary file 2 [file 5191dd989857df46d2b21acd.xlsx]

## Sheet: resfinder_SI_MAGs
#FILE	SEQUENCE	START	END	STRAND	GENE	COVERAGE	COVERAGE_MAP	GAPS	%COVERAGE	%IDENTITY	DATABASE	ACCESSION	PRODUCT	RESISTANCE
DTU_2014_1035953_100_SI_LVK_17_SE.fq.gz_flye.fasta	DTU_2014_1035953_100_SI_LVK_17_SE.fq.gz_flye_contig_10	194643	195875	-	mdf(A)_1	1-1233/1233	===============	0/0	100	98.86	resfinder	Y08743	mdf(A)
DTU_2014_1035953_100_SI_LVK_17_SE.fq.gz_flye.fasta	DTU_2014_1035953_100_SI_LVK_17_SE.fq.gz_flye_contig_15	85931	87144	+	floR_2	1-1214/1215	===============	0/0	99.92	98.19	resfinder	AF118107	floR	Chloramphenicol;Florfenicol
DTU_2014_1035953_100_SI_LVK_17_SE.fq.gz_flye.fasta	DTU_2014_1035953_100_SI_LVK_17_SE.fq.gz_flye_contig_15	98434	99294	+	blaTEM-1B_1	1-861/861	===============	0/0	100	100	resfinder	AY458016	blaTEM-1B	Amoxicillin;Ampicillin;Cephalothin;Piperacillin;Ticarcillin
DTU_2024_1035952_100_SI_LVK_11_SE.fq.gz_flye.fasta	DTU_2024_1035952_100_SI_LVK_11_SE.fq.gz_flye_contig_13	4466	5671	+	tet(B)_2	1-1206/1206	===============	0/0	100	99.92	resfinder	AF326777	tet(B)	Doxycycline;Tetracycline;Minocycline
DTU_2024_1035952_100_SI_LVK_11_SE.fq.gz_flye.fasta	DTU_2024_1035952_100_SI_LVK_11_SE.fq.gz_flye_contig_13	8221	9036	-	sul2_2	1-816/816	===============	0/0	100	99.88	resfinder	AY034138	sul2	Sulfamethoxazole
DTU_2024_1035952_100_SI_LVK_11_SE.fq.gz_flye.fasta	DTU_2024_1035952_100_SI_LVK_11_SE.fq.gz_flye_contig_2	335527	336759	+	mdf(A)_1	1-1233/1233	===============	0/0	100	98.46	resfinder	Y08743	mdf(A)
DTU_2024_1035952_100_SI_LVK_11_SE.fq.gz_flye.fasta	DTU_2024_1035952_100_SI_LVK_11_SE.fq.gz_flye_contig_31	3584	4387	+	aph(3'')-Ib_5	1-804/804	===============	0/0	100	100	resfinder	AF321551	aph(3'')-Ib	Streptomycin
DTU_2024_1035952_100_SI_LVK_11_SE.fq.gz_flye.fasta	DTU_2024_1035952_100_SI_LVK_11_SE.fq.gz_flye_contig_31	4387	5223	+	aph(6)-Id_1	1-837/837	===============	0/0	100	100	resfinder	M28829	aph(6)-Id	Streptomycin
DTU_2024_1035952_100_SI_LVK_11_SE.fq.gz_flye.fasta	DTU_2024_1035952_100_SI_LVK_11_SE.fq.gz_flye_contig_31	5441	6254	+	aph(3')-Ia_1	1-814/816	===============	0/0	99.75	99.75	resfinder	V00359	aph(3')-Ia
DTU_2024_1035952_100_SI_LVK_11_SE.fq.gz_flye.fasta	DTU_2024_1035952_100_SI_LVK_11_SE.fq.gz_flye_contig_9	5182	5945	-	erm(B)_18	1-762/762	========/======	2025-02-02	100	98.95	resfinder	X66468	erm(B)	Erythromycin;Lincomycin;Clindamycin;Quinupristin;Pristinamycin_IA;Virginiamycin_S
DTU_2024_1035952_100_SI_LVK_11_SE.fq.gz_flye.fasta	DTU_2024_1035952_100_SI_LVK_11_SE.fq.gz_flye_contig_9	7101	8022	+	mph(A)_2	1-921/921	========/======	2025-01-01	100	99.67	resfinder	U36578	mph(A)	Erythromycin;Azithromycin;Spiramycin;Telithromycin
DTU_2024_1035952_100_SI_LVK_11_SE.fq.gz_flye.fasta	DTU_2024_1035952_100_SI_LVK_11_SE.fq.gz_flye_contig_9	10791	11651	+	blaTEM-1B_1	1-861/861	===============	0/0	100	100	resfinder	AY458016	blaTEM-1B	Amoxicillin;Ampicillin;Cephalothin;Piperacillin;Ticarcillin
DTU_2024_1035954_100_SI_LVK_43_SE.fq.gz_flye.fasta	DTU_2024_1035954_100_SI_LVK_43_SE.fq.gz_flye_contig_12	23330	24190	-	blaTEM-1B_1	1-861/861	===============	0/0	100	100	resfinder	AY458016	blaTEM-1B	Amoxicillin;Ampicillin;Cephalothin;Piperacillin;Ticarcillin
DTU_2024_1035954_100_SI_LVK_43_SE.fq.gz_flye.fasta	DTU_2024_1035954_100_SI_LVK_43_SE.fq.gz_flye_contig_12	26406	27209	-	lnu(G)_1	1-804/804	===============	0/0	100	100	resfinder	KX470419	lnu(G)	Lincomycin
DTU_2024_1035954_100_SI_LVK_43_SE.fq.gz_flye.fasta	DTU_2024_1035954_100_SI_LVK_43_SE.fq.gz_flye_contig_12	27584	28551	-	ant(3'')-Ia_1	1-972/972	========/======	2025-04-02	99.59	96.4	resfinder	X02340	ant(3'')-Ia	Streptomycin
DTU_2024_1035954_100_SI_LVK_43_SE.fq.gz_flye.fasta	DTU_2024_1035954_100_SI_LVK_43_SE.fq.gz_flye_contig_2	52037	53062	-	aph(4)-Ia_1	1-1026/1026	===============	0/0	100	100	resfinder	V01499	aph(4)-Ia
DTU_2024_1035954_100_SI_LVK_43_SE.fq.gz_flye.fasta	DTU_2024_1035954_100_SI_LVK_43_SE.fq.gz_flye_contig_2	53283	54067	-	aac(3)-IVa_1	1-786/786	========/======	2025-01-01	99.87	99.87	resfinder	X01385	aac(3)-IVa	Gentamicin;Tobramycin
DTU_2024_1035954_100_SI_LVK_43_SE.fq.gz_flye.fasta	DTU_2024_1035954_100_SI_LVK_43_SE.fq.gz_flye_contig_2	58037	58839	+	aph(3'')-Ib_2	2-804/804	===============	0/0	99.88	100	resfinder	AF024602	aph(3'')-Ib	Streptomycin
DTU_2024_1035954_100_SI_LVK_43_SE.fq.gz_flye.fasta	DTU_2024_1035954_100_SI_LVK_43_SE.fq.gz_flye_contig_2	58839	59675	+	aph(6)-Id_1	1-837/837	===============	0/0	100	100	resfinder	M28829	aph(6)-Id	Streptomycin
DTU_2024_1035954_100_SI_LVK_43_SE.fq.gz_flye.fasta	DTU_2024_1035954_100_SI_LVK_43_SE.fq.gz_flye_contig_2	179159	180364	-	tet(B)_2	1-1206/1206	===============	0/0	100	100	resfinder	AF326777	tet(B)	Doxycycline;Tetracycline;Minocycline
DTU_2024_1035954_100_SI_LVK_43_SE.fq.gz_flye.fasta	DTU_2024_1035954_100_SI_LVK_43_SE.fq.gz_flye_contig_3	1335318	1336550	-	mdf(A)_1	1-1233/1233	===============	0/0	100	98.46	resfinder	Y08743	mdf(A)
DTU_2024_1035955_100_SI_LVK_48_SE.fq.gz_flye.fasta	DTU_2024_1035955_100_SI_LVK_48_SE.fq.gz_flye_contig_12	129955	130815	+	aac(3)-IId_1	1-861/861	===============	0/0	100	99.88	resfinder	EU022314	aac(3)-IId	Gentamicin;Tobramycin
DTU_2024_1035955_100_SI_LVK_48_SE.fq.gz_flye.fasta	DTU_2024_1035955_100_SI_LVK_48_SE.fq.gz_flye_contig_12	133434	134399	+	ant(3'')-Ia_1	1-970/972	========/======	2025-04-02	99.38	93.2	resfinder	X02340	ant(3'')-Ia	Streptomycin
DTU_2024_1035955_100_SI_LVK_48_SE.fq.gz_flye.fasta	DTU_2024_1035955_100_SI_LVK_48_SE.fq.gz_flye_contig_12	134533	135354	+	lnu(F)_1	1-822/822	===============	0/0	100	100	resfinder	EU118119	lnu(F)	Lincomycin
DTU_2024_1035955_100_SI_LVK_48_SE.fq.gz_flye.fasta	DTU_2024_1035955_100_SI_LVK_48_SE.fq.gz_flye_contig_12	137243	138103	+	blaTEM-1B_1	1-861/861	===============	0/0	100	100	resfinder	AY458016	blaTEM-1B	Amoxicillin;Ampicillin;Cephalothin;Piperacillin;Ticarcillin
DTU_2024_1035955_100_SI_LVK_48_SE.fq.gz_flye.fasta	DTU_2024_1035955_100_SI_LVK_48_SE.fq.gz_flye_contig_12	138361	139152	-	sul3_2	1-792/792	===============	0/0	100	100	resfinder	AJ459418	sul3	Sulfamethoxazole
DTU_2024_1035955_100_SI_LVK_48_SE.fq.gz_flye.fasta	DTU_2024_1035955_100_SI_LVK_48_SE.fq.gz_flye_contig_12	142071	142886	+	aph(3')-Ia_1	1-816/816	===============	0/0	100	100	resfinder	V00359	aph(3')-Ia
DTU_2024_1035955_100_SI_LVK_48_SE.fq.gz_flye.fasta	DTU_2024_1035955_100_SI_LVK_48_SE.fq.gz_flye_contig_12	147388	148634	-	tet(A)_6	1-1247/1275	===============	0/0	97.8	99.92	resfinder	AF534183	tet(A)	Doxycycline;Tetracycline
DTU_2024_1035955_100_SI_LVK_48_SE.fq.gz_flye.fasta	DTU_2024_1035955_100_SI_LVK_48_SE.fq.gz_flye_contig_12	153843	154658	+	sul2_2	1-816/816	===============	0/0	100	100	resfinder	AY034138	sul2	Sulfamethoxazole
DTU_2024_1035955_100_SI_LVK_48_SE.fq.gz_flye.fasta	DTU_2024_1035955_100_SI_LVK_48_SE.fq.gz_flye_contig_13	45021	46940	+	tet(M)_8	1-1920/1920	===============	0/0	100	96.15	resfinder	X04388	tet(M)	Doxycycline;Tetracycline;Minocycline
DTU_2024_1035955_100_SI_LVK_48_SE.fq.gz_flye.fasta	DTU_2024_1035955_100_SI_LVK_48_SE.fq.gz_flye_contig_13	49752	51011	-	cmlA1_1	1-1260/1260	===============	0/0	100	99.92	resfinder	M64556	cmlA1	Chloramphenicol
DTU_2024_1035955_100_SI_LVK_48_SE.fq.gz_flye.fasta	DTU_2024_1035955_100_SI_LVK_48_SE.fq.gz_flye_contig_13	51273	52074	-	aadA2_1	18-819/819	===============	0/0	97.92	99.88	resfinder	NC_010870	aadA2	Streptomycin
DTU_2024_1035955_100_SI_LVK_48_SE.fq.gz_flye.fasta	DTU_2024_1035955_100_SI_LVK_48_SE.fq.gz_flye_contig_13	52472	52969	-	dfrA12_8	1-498/498	===============	0/0	100	100	resfinder	AM040708	dfrA12	Trimethoprim
DTU_2024_1035955_100_SI_LVK_48_SE.fq.gz_flye.fasta	DTU_2024_1035955_100_SI_LVK_48_SE.fq.gz_flye_contig_9	190359	191591	+	mdf(A)_1	1-1233/1233	===============	0/0	100	98.05	resfinder	Y08743	mdf(A)
DTU_2024_1035956_100_SI_LVK_60_SE.fq.gz_flye.fasta	DTU_2024_1035956_100_SI_LVK_60_SE.fq.gz_flye_contig_2	95196	96428	+	mdf(A)_1	1-1233/1233	===============	0/0	100	98.05	resfinder	Y08743	mdf(A)
DTU_2024_1035956_100_SI_LVK_60_SE.fq.gz_flye.fasta	DTU_2024_1035956_100_SI_LVK_60_SE.fq.gz_flye_contig_37	5214	5977	-	erm(B)_18	1-762/762	========/======	2025-02-02	100	98.95	resfinder	X66468	erm(B)	Erythromycin;Lincomycin;Clindamycin;Quinupristin;Pristinamycin_IA;Virginiamycin_S
DTU_2024_1035957_100_SI_LVK_61_SE.fq.gz_flye.fasta	DTU_2024_1035957_100_SI_LVK_61_SE.fq.gz_flye_contig_1	825874	827106	+	mdf(A)_1	1-1233/1233	===============	0/0	100	98.46	resfinder	Y08743	mdf(A)
DTU_2024_1035957_100_SI_LVK_61_SE.fq.gz_flye.fasta	DTU_2024_1035957_100_SI_LVK_61_SE.fq.gz_flye_contig_15	50694	51940	-	tet(A)_6	1-1247/1275	===============	0/0	97.8	100	resfinder	AF534183	tet(A)	Doxycycline;Tetracycline
DTU_2024_1035957_100_SI_LVK_61_SE.fq.gz_flye.fasta	DTU_2024_1035957_100_SI_LVK_61_SE.fq.gz_flye_contig_15	60848	61663	-	aph(3')-Ia_1	1-816/816	===============	0/0	100	100	resfinder	V00359	aph(3')-Ia
DTU_2024_1035957_100_SI_LVK_61_SE.fq.gz_flye.fasta	DTU_2024_1035957_100_SI_LVK_61_SE.fq.gz_flye_contig_15	63325	64128	-	aph(3'')-Ib_5	1-804/804	===============	0/0	100	100	resfinder	AF321551	aph(3'')-Ib	Streptomycin
DTU_2024_1035957_100_SI_LVK_61_SE.fq.gz_flye.fasta	DTU_2024_1035957_100_SI_LVK_61_SE.fq.gz_flye_contig_15	64189	65004	-	sul2_3	1-816/816	===============	0/0	100	100	resfinder	HQ840942	sul2	Sulfamethoxazole
DTU_2024_1035957_100_SI_LVK_61_SE.fq.gz_flye.fasta	DTU_2024_1035957_100_SI_LVK_61_SE.fq.gz_flye_contig_15	68208	69068	+	blaTEM-1B_1	1-861/861	===============	0/0	100	100	resfinder	AY458016	blaTEM-1B	Amoxicillin;Ampicillin;Cephalothin;Piperacillin;Ticarcillin
DTU_2024_1035957_100_SI_LVK_61_SE.fq.gz_flye.fasta	DTU_2024_1035957_100_SI_LVK_61_SE.fq.gz_flye_contig_15	81228	82068	-	sul1_5	1-841/867	===============	0/0	97	99.76	resfinder	EU780013	sul1	Sulfamethoxazole
DTU_2024_1035957_100_SI_LVK_61_SE.fq.gz_flye.fasta	DTU_2024_1035957_100_SI_LVK_61_SE.fq.gz_flye_contig_15	83430	83903	-	dfrA1_10	1-474/474	===============	0/0	100	99.58	resfinder	AF203818	dfrA1	Trimethoprim
DTU_2024_1035957_100_SI_LVK_61_SE.fq.gz_flye.fasta	DTU_2024_1035957_100_SI_LVK_61_SE.fq.gz_flye_contig_16	4319	5179	+	blaTEM-1B_1	1-861/861	===============	0/0	100	100	resfinder	AY458016	blaTEM-1B	Amoxicillin;Ampicillin;Cephalothin;Piperacillin;Ticarcillin
DTU_2024_1035957_100_SI_LVK_61_SE.fq.gz_flye.fasta	DTU_2024_1035957_100_SI_LVK_61_SE.fq.gz_flye_contig_16	6682	7497	+	sul2_2	1-816/816	===============	0/0	100	100	resfinder	AY034138	sul2	Sulfamethoxazole
DTU_2024_1035957_100_SI_LVK_61_SE.fq.gz_flye.fasta	DTU_2024_1035957_100_SI_LVK_61_SE.fq.gz_flye_contig_16	7558	8361	+	aph(3'')-Ib_5	1-804/804	===============	0/0	100	100	resfinder	AF321551	aph(3'')-Ib	Streptomycin
DTU_2024_1035957_100_SI_LVK_61_SE.fq.gz_flye.fasta	DTU_2024_1035957_100_SI_LVK_61_SE.fq.gz_flye_contig_16	8361	9197	+	aph(6)-Id_1	1-837/837	===============	0/0	100	99.88	resfinder	M28829	aph(6)-Id	Streptomycin
DTU_2024_1035958_100_SI_LVK_74_SE.fq.gz_flye.fasta	DTU_2024_1035958_100_SI_LVK_74_SE.fq.gz_flye_contig_20	633783	635015	+	mdf(A)_1	1-1233/1233	===============	0/0	100	98.86	resfinder	Y08743	mdf(A)
DTU_2024_1035958_100_SI_LVK_74_SE.fq.gz_flye.fasta	DTU_2024_1035958_100_SI_LVK_74_SE.fq.gz_flye_contig_4	51432	52399	+	ant(3'')-Ia_1	1-972/972	========/======	2025-04-02	99.59	97.33	resfinder	X02340	ant(3'')-Ia	Streptomycin
DTU_2024_1035958_100_SI_LVK_74_SE.fq.gz_flye.fasta	DTU_2024_1035958_100_SI_LVK_74_SE.fq.gz_flye_contig_4	52877	53743	+	sul1_5	1-867/867	===============	0/0	100	99.89	resfinder	EU780013	sul1	Sulfamethoxazole
DTU_2024_1035958_100_SI_LVK_74_SE.fq.gz_flye.fasta	DTU_2024_1035958_100_SI_LVK_74_SE.fq.gz_flye_contig_4	61475	62383	+	mph(B)_1	1-909/909	===============	0/0	100	100	resfinder	D85892	mph(B)	Erythromycin;Spiramycin;Telithromycin
DTU_2024_1035958_100_SI_LVK_74_SE.fq.gz_flye.fasta	DTU_2024_1035958_100_SI_LVK_74_SE.fq.gz_flye_contig_4	192815	194020	+	tet(B)_2	1-1206/1206	===============	0/0	100	100	resfinder	AF326777	tet(B)	Doxycycline;Tetracycline;Minocycline
DTU_2024_1035959_100_SI_LVK_80_SE.fq.gz_flye.fasta	DTU_2024_1035959_100_SI_LVK_80_SE.fq.gz_flye_contig_12	67767	68633	-	sul1_5	1-867/867	===============	0/0	100	99.89	resfinder	EU780013	sul1	Sulfamethoxazole
DTU_2024_1035959_100_SI_LVK_80_SE.fq.gz_flye.fasta	DTU_2024_1035959_100_SI_LVK_80_SE.fq.gz_flye_contig_12	69995	70468	-	dfrA1_10	1-474/474	===============	0/0	100	99.79	resfinder	AF203818	dfrA1	Trimethoprim
DTU_2024_1035959_100_SI_LVK_80_SE.fq.gz_flye.fasta	DTU_2024_1035959_100_SI_LVK_80_SE.fq.gz_flye_contig_14	218570	219802	+	mdf(A)_1	1-1233/1233	===============	0/0	100	98.78	resfinder	Y08743	mdf(A)
DTU_2024_1035959_100_SI_LVK_80_SE.fq.gz_flye.fasta	DTU_2024_1035959_100_SI_LVK_80_SE.fq.gz_flye_contig_29	87938	88411	+	dfrA1_10	1-474/474	===============	0/0	100	99.79	resfinder	AF203818	dfrA1	Trimethoprim
DTU_2024_1035959_100_SI_LVK_80_SE.fq.gz_flye.fasta	DTU_2024_1035959_100_SI_LVK_80_SE.fq.gz_flye_contig_29	91749	92615	+	sul1_5	1-867/867	===============	0/0	100	99.89	resfinder	EU780013	sul1	Sulfamethoxazole
DTU_2024_1035959_100_SI_LVK_80_SE.fq.gz_flye.fasta	DTU_2024_1035959_100_SI_LVK_80_SE.fq.gz_flye_contig_29	100347	101255	+	mph(B)_1	1-909/909	===============	0/0	100	100	resfinder	D85892	mph(B)	Erythromycin;Spiramycin;Telithromycin
DTU_2024_1035959_100_SI_LVK_80_SE.fq.gz_flye.fasta	DTU_2024_1035959_100_SI_LVK_80_SE.fq.gz_flye_contig_29	112684	113520	-	aph(6)-Id_1	1-837/837	===============	0/0	100	100	resfinder	M28829	aph(6)-Id	Streptomycin
DTU_2024_1035959_100_SI_LVK_80_SE.fq.gz_flye.fasta	DTU_2024_1035959_100_SI_LVK_80_SE.fq.gz_flye_contig_29	113520	114322	-	aph(3'')-Ib_2	2-804/804	===============	0/0	99.88	100	resfinder	AF024602	aph(3'')-Ib	Streptomycin
DTU_2024_1035959_100_SI_LVK_80_SE.fq.gz_flye.fasta	DTU_2024_1035959_100_SI_LVK_80_SE.fq.gz_flye_contig_29	118308	119123	+	aph(3')-Ia_7	1-816/816	===============	0/0	100	100	resfinder	X62115	aph(3')-Ia
DTU_2024_1035960_100_SI_LVK_83_SE.fq.gz_flye.fasta	DTU_2024_1035960_100_SI_LVK_83_SE.fq.gz_flye_contig_1	466439	467671	-	mdf(A)_1	1-1233/1233	===============	0/0	100	99.92	resfinder	Y08743	mdf(A)
DTU_2024_1035960_100_SI_LVK_83_SE.fq.gz_flye.fasta	DTU_2024_1035960_100_SI_LVK_83_SE.fq.gz_flye_contig_10	16752	17998	-	tet(A)_6	1-1247/1275	===============	0/0	97.8	100	resfinder	AF534183	tet(A)	Doxycycline;Tetracycline
DTU_2024_1035960_100_SI_LVK_83_SE.fq.gz_flye.fasta	DTU_2024_1035960_100_SI_LVK_83_SE.fq.gz_flye_contig_10	26906	27721	-	aph(3')-Ia_1	1-816/816	===============	0/0	100	100	resfinder	V00359	aph(3')-Ia
DTU_2024_1035960_100_SI_LVK_83_SE.fq.gz_flye.fasta	DTU_2024_1035960_100_SI_LVK_83_SE.fq.gz_flye_contig_10	28728	29201	-	dfrA5_1	1-474/474	===============	0/0	100	100	resfinder	X12868	dfrA5	Trimethoprim
DTU_2024_1035960_100_SI_LVK_83_SE.fq.gz_flye.fasta	DTU_2024_1035960_100_SI_LVK_83_SE.fq.gz_flye_contig_6	16479	17339	-	blaTEM-1B_1	1-861/861	===============	0/0	100	100	resfinder	AY458016	blaTEM-1B	Amoxicillin;Ampicillin;Cephalothin;Piperacillin;Ticarcillin
DTU_2024_1035960_100_SI_LVK_83_SE.fq.gz_flye.fasta	DTU_2024_1035960_100_SI_LVK_83_SE.fq.gz_flye_contig_6	22161	22976	+	sul2_2	1-816/816	===============	0/0	100	100	resfinder	AY034138	sul2	Sulfamethoxazole
DTU_2024_1035961_100_SI_LVK_94_SE.fq.gz_flye.fasta	DTU_2024_1035961_100_SI_LVK_94_SE.fq.gz_flye_contig_12	35013	35879	-	sul1_5	1-867/867	===============	0/0	100	99.89	resfinder	EU780013	sul1	Sulfamethoxazole
DTU_2024_1035961_100_SI_LVK_94_SE.fq.gz_flye.fasta	DTU_2024_1035961_100_SI_LVK_94_SE.fq.gz_flye_contig_34	206	1465	+	cmlA1_1	1-1260/1260	===============	0/0	100	99.92	resfinder	M64556	cmlA1	Chloramphenicol
DTU_2024_1035961_100_SI_LVK_94_SE.fq.gz_flye.fasta	DTU_2024_1035961_100_SI_LVK_94_SE.fq.gz_flye_contig_34	3520	4311	-	sul3_2	1-792/792	===============	0/0	100	100	resfinder	AJ459418	sul3	Sulfamethoxazole
DTU_2024_1035961_100_SI_LVK_94_SE.fq.gz_flye.fasta	DTU_2024_1035961_100_SI_LVK_94_SE.fq.gz_flye_contig_5	600164	601396	+	mdf(A)_1	1-1233/1233	===============	0/0	100	99.92	resfinder	Y08743	mdf(A)
DTU_2024_1035961_100_SI_LVK_94_SE.fq.gz_flye.fasta	DTU_2024_1035961_100_SI_LVK_94_SE.fq.gz_flye_contig_6	32618	33864	-	tet(A)_6	1-1247/1275	===============	0/0	97.8	100	resfinder	AF534183	tet(A)	Doxycycline;Tetracycline
DTU_2024_1035961_100_SI_LVK_94_SE.fq.gz_flye.fasta	DTU_2024_1035961_100_SI_LVK_94_SE.fq.gz_flye_contig_6	36739	37575	-	aph(6)-Id_1	1-837/837	===============	0/0	100	100	resfinder	M28829	aph(6)-Id	Streptomycin
DTU_2024_1035961_100_SI_LVK_94_SE.fq.gz_flye.fasta	DTU_2024_1035961_100_SI_LVK_94_SE.fq.gz_flye_contig_6	37575	38377	-	aph(3'')-Ib_2	2-804/804	===============	0/0	99.88	100	resfinder	AF024602	aph(3'')-Ib	Streptomycin
DTU_2024_1035961_100_SI_LVK_94_SE.fq.gz_flye.fasta	DTU_2024_1035961_100_SI_LVK_94_SE.fq.gz_flye_contig_6	43663	44523	+	blaTEM-1B_1	1-861/861	===============	0/0	100	100	resfinder	AY458016	blaTEM-1B	Amoxicillin;Ampicillin;Cephalothin;Piperacillin;Ticarcillin
DTU_2024_1035961_100_SI_LVK_94_SE.fq.gz_flye.fasta	DTU_2024_1035961_100_SI_LVK_94_SE.fq.gz_flye_contig_6	54788	55750	+	ant(3'')-Ia_1	1-970/972	========/======	2025-07-03	99.07	94.54	resfinder	X02340	ant(3'')-Ia	Streptomycin
DTU_2024_1035962_100_SI_LVK_97_SE.fq.gz_flye.fasta	DTU_2024_1035962_100_SI_LVK_97_SE.fq.gz_flye_contig_2	92692	93924	-	mdf(A)_1	1-1233/1233	===============	0/0	100	99.92	resfinder	Y08743	mdf(A)
DTU_2024_1035962_100_SI_LVK_97_SE.fq.gz_flye.fasta	DTU_2024_1035962_100_SI_LVK_97_SE.fq.gz_flye_contig_43	19515	19988	+	dfrA1_10	1-474/474	===============	0/0	100	99.79	resfinder	AF203818	dfrA1	Trimethoprim
DTU_2024_1035962_100_SI_LVK_97_SE.fq.gz_flye.fasta	DTU_2024_1035962_100_SI_LVK_97_SE.fq.gz_flye_contig_43	21276	22142	+	sul1_5	1-867/867	===============	0/0	100	99.89	resfinder	EU780013	sul1	Sulfamethoxazole
DTU_2024_1035963_100_SI_LVK_98_SE.fq.gz_flye.fasta	DTU_2024_1035963_100_SI_LVK_98_SE.fq.gz_flye_contig_10	207759	208991	-	mdf(A)_1	1-1233/1233	===============	0/0	100	99.43	resfinder	Y08743	mdf(A)
DTU_2024_1035963_100_SI_LVK_98_SE.fq.gz_flye.fasta	DTU_2024_1035963_100_SI_LVK_98_SE.fq.gz_flye_contig_5	593587	594792	-	tet(B)_2	1-1206/1206	===============	0/0	100	100	resfinder	AF326777	tet(B)	Doxycycline;Tetracycline;Minocycline
DTU_2024_1035964_100_SI_LVK_102_SE.fq.gz_flye.fasta	DTU_2024_1035964_100_SI_LVK_102_SE.fq.gz_flye_contig_16	143725	144957	-	mdf(A)_1	1-1233/1233	===============	0/0	100	98.86	resfinder	Y08743	mdf(A)
DTU_2024_1035964_100_SI_LVK_102_SE.fq.gz_flye.fasta	DTU_2024_1035964_100_SI_LVK_102_SE.fq.gz_flye_contig_20	6920	7708	+	aadA4_1	1-789/789	===============	0/0	100	99.62	resfinder	Z50802	aadA4	Streptomycin
DTU_2024_1035964_100_SI_LVK_102_SE.fq.gz_flye.fasta	DTU_2024_1035964_100_SI_LVK_102_SE.fq.gz_flye_contig_20	8227	9093	+	sul1_5	1-867/867	===============	0/0	100	99.89	resfinder	EU780013	sul1	Sulfamethoxazole
DTU_2024_1035964_100_SI_LVK_102_SE.fq.gz_flye.fasta	DTU_2024_1035964_100_SI_LVK_102_SE.fq.gz_flye_contig_9	179342	180547	+	tet(B)_1	1-1206/1206	===============	0/0	100	100	resfinder	AP000342	tet(B)	Doxycycline;Tetracycline;Minocycline
DTU_2024_1035965_100_SI_LVK_103_SE.fq.gz_flye.fasta	DTU_2024_1035965_100_SI_LVK_103_SE.fq.gz_flye_contig_3	735627	736859	+	mdf(A)_1	1-1233/1233	===============	0/0	100	98.7	resfinder	Y08743	mdf(A)
DTU_2024_1035966_100_SI_DTU_42C_SE.fq.gz_flye.fasta	DTU_2024_1035966_100_SI_DTU_42C_SE.fq.gz_flye_contig_39	70021	71267	-	tet(A)_6	1-1247/1275	===============	0/0	97.8	100	resfinder	AF534183	tet(A)	Doxycycline;Tetracycline
DTU_2024_1035966_100_SI_DTU_42C_SE.fq.gz_flye.fasta	DTU_2024_1035966_100_SI_DTU_42C_SE.fq.gz_flye_contig_39	80175	80929	-	aph(3')-Ia_1	62-816/816	.==============	0/0	92.52	100	resfinder	V00359	aph(3')-Ia
DTU_2024_1035966_100_SI_DTU_42C_SE.fq.gz_flye.fasta	DTU_2024_1035966_100_SI_DTU_42C_SE.fq.gz_flye_contig_46	91765	92997	-	mdf(A)_1	1-1233/1233	===============	0/0	100	98.86	resfinder	Y08743	mdf(A)
DTU_2024_1035966_100_SI_DTU_42C_SE.fq.gz_flye.fasta	DTU_2024_1035966_100_SI_DTU_42C_SE.fq.gz_flye_contig_71	5399	5896	+	dfrA12_8	1-498/498	===============	0/0	100	100	resfinder	AM040708	dfrA12	Trimethoprim
DTU_2024_1035966_100_SI_DTU_42C_SE.fq.gz_flye.fasta	DTU_2024_1035966_100_SI_DTU_42C_SE.fq.gz_flye_contig_71	6294	7095	+	aadA2_1	18-819/819	===============	0/0	97.92	99.88	resfinder	NC_010870	aadA2	Streptomycin
DTU_2024_1035966_100_SI_DTU_42C_SE.fq.gz_flye.fasta	DTU_2024_1035966_100_SI_DTU_42C_SE.fq.gz_flye_contig_71	7357	8616	+	cmlA1_1	1-1260/1260	===============	0/0	100	99.92	resfinder	M64556	cmlA1	Chloramphenicol
DTU_2024_1035966_100_SI_DTU_42C_SE.fq.gz_flye.fasta	DTU_2024_1035966_100_SI_DTU_42C_SE.fq.gz_flye_contig_71	11182	11973	-	sul3_2	1-792/792	===============	0/0	100	100	resfinder	AJ459418	sul3	Sulfamethoxazole
DTU_2024_1035967_100_SI_DTU_48A_SE.fq.gz_flye.fasta	DTU_2024_1035967_100_SI_DTU_48A_SE.fq.gz_flye_contig_15	526159	527391	-	mdf(A)_1	1-1233/1233	===============	0/0	100	99.92	resfinder	Y08743	mdf(A)
DTU_2024_1035967_100_SI_DTU_48A_SE.fq.gz_flye.fasta	DTU_2024_1035967_100_SI_DTU_48A_SE.fq.gz_flye_contig_16	82185	82982	+	aadA7_1	1-798/798	===============	0/0	100	100	resfinder	AF224733	aadA7	Streptomycin
DTU_2024_1035967_100_SI_DTU_48A_SE.fq.gz_flye.fasta	DTU_2024_1035967_100_SI_DTU_48A_SE.fq.gz_flye_contig_16	83047	83844	+	aadA7_1	1-798/798	===============	0/0	100	100	resfinder	AF224733	aadA7	Streptomycin
DTU_2024_1035967_100_SI_DTU_48A_SE.fq.gz_flye.fasta	DTU_2024_1035967_100_SI_DTU_48A_SE.fq.gz_flye_contig_16	84322	85188	+	sul1_5	1-867/867	===============	0/0	100	99.89	resfinder	EU780013	sul1	Sulfamethoxazole
DTU_2024_1035967_100_SI_DTU_48A_SE.fq.gz_flye.fasta	DTU_2024_1035967_100_SI_DTU_48A_SE.fq.gz_flye_contig_16	87178	87993	+	aph(3')-Ia_10	1-816/816	===============	0/0	100	99.75	resfinder	EU855787	aph(3')-Ia
DTU_2024_1035967_100_SI_DTU_48A_SE.fq.gz_flye.fasta	DTU_2024_1035967_100_SI_DTU_48A_SE.fq.gz_flye_contig_16	153388	154593	-	tet(B)_1	1-1206/1206	===============	0/0	100	99.92	resfinder	AP000342	tet(B)	Doxycycline;Tetracycline;Minocycline
DTU_2024_1035967_100_SI_DTU_48A_SE.fq.gz_flye.fasta	DTU_2024_1035967_100_SI_DTU_48A_SE.fq.gz_flye_contig_29	35332	35981	-	qnrS1_1	1-650/657	===============	0/0	98.93	100	resfinder	AB187515	qnrS1	Ciprofloxacin
DTU_2024_1035967_100_SI_DTU_48A_SE.fq.gz_flye.fasta	DTU_2024_1035967_100_SI_DTU_48A_SE.fq.gz_flye_contig_29	41343	42203	+	blaTEM-1B_1	1-861/861	===============	0/0	100	100	resfinder	AY458016	blaTEM-1B	Amoxicillin;Ampicillin;Cephalothin;Piperacillin;Ticarcillin
DTU_2024_1035967_100_SI_DTU_48A_SE.fq.gz_flye.fasta	DTU_2024_1035967_100_SI_DTU_48A_SE.fq.gz_flye_contig_29	60316	61281	+	ant(3'')-Ia_1	1-970/972	========/======	2025-04-02	99.38	93.2	resfinder	X02340	ant(3'')-Ia	Streptomycin
DTU_2024_1035967_100_SI_DTU_48A_SE.fq.gz_flye.fasta	DTU_2024_1035967_100_SI_DTU_48A_SE.fq.gz_flye_contig_29	61415	62236	+	lnu(F)_1	1-822/822	===============	0/0	100	99.88	resfinder	EU118119	lnu(F)	Lincomycin
DTU_2024_1035968_100_SI_DTU_52A_SE.fq.gz_flye.fasta	DTU_2024_1035968_100_SI_DTU_52A_SE.fq.gz_flye_contig_10	44246	45478	-	mdf(A)_1	1-1233/1233	===============	0/0	100	98.46	resfinder	Y08743	mdf(A)
DTU_2024_1035968_100_SI_DTU_52A_SE.fq.gz_flye.fasta	DTU_2024_1035968_100_SI_DTU_52A_SE.fq.gz_flye_contig_31	20124	21091	+	ant(3'')-Ia_1	1-972/972	========/======	2025-04-02	99.59	97.43	resfinder	X02340	ant(3'')-Ia	Streptomycin
DTU_2024_1035968_100_SI_DTU_52A_SE.fq.gz_flye.fasta	DTU_2024_1035968_100_SI_DTU_52A_SE.fq.gz_flye_contig_36	105994	106854	+	blaTEM-1B_1	1-861/861	===============	0/0	100	100	resfinder	AY458016	blaTEM-1B	Amoxicillin;Ampicillin;Cephalothin;Piperacillin;Ticarcillin
DTU_2024_1035968_100_SI_DTU_52A_SE.fq.gz_flye.fasta	DTU_2024_1035968_100_SI_DTU_52A_SE.fq.gz_flye_contig_36	110071	110886	+	sul2_3	1-816/816	===============	0/0	100	100	resfinder	HQ840942	sul2	Sulfamethoxazole
DTU_2024_1035968_100_SI_DTU_52A_SE.fq.gz_flye.fasta	DTU_2024_1035968_100_SI_DTU_52A_SE.fq.gz_flye_contig_36	110947	111750	+	aph(3'')-Ib_5	1-804/804	===============	0/0	100	100	resfinder	AF321551	aph(3'')-Ib	Streptomycin
DTU_2024_1035968_100_SI_DTU_52A_SE.fq.gz_flye.fasta	DTU_2024_1035968_100_SI_DTU_52A_SE.fq.gz_flye_contig_36	111750	112586	+	aph(6)-Id_1	1-837/837	===============	0/0	100	100	resfinder	M28829	aph(6)-Id	Streptomycin
DTU_2024_1035968_100_SI_DTU_52A_SE.fq.gz_flye.fasta	DTU_2024_1035968_100_SI_DTU_52A_SE.fq.gz_flye_contig_36	113833	114306	+	dfrA1_10	1-474/474	===============	0/0	100	99.79	resfinder	AF203818	dfrA1	Trimethoprim
DTU_2024_1035968_100_SI_DTU_52A_SE.fq.gz_flye.fasta	DTU_2024_1035968_100_SI_DTU_52A_SE.fq.gz_flye_contig_36	115668	116534	+	sul1_5	1-867/867	===============	0/0	100	99.89	resfinder	EU780013	sul1	Sulfamethoxazole
DTU_2024_1035968_100_SI_DTU_52A_SE.fq.gz_flye.fasta	DTU_2024_1035968_100_SI_DTU_52A_SE.fq.gz_flye_contig_36	124267	125174	+	mph(B)_1	1-908/909	===============	0/0	99.89	100	resfinder	D85892	mph(B)	Erythromycin;Spiramycin;Telithromycin
DTU_2024_1035968_100_SI_DTU_52A_SE.fq.gz_flye.fasta	DTU_2024_1035968_100_SI_DTU_52A_SE.fq.gz_flye_contig_36	126929	128175	+	tet(A)_6	1-1247/1275	===============	0/0	97.8	100	resfinder	AF534183	tet(A)	Doxycycline;Tetracycline
DTU_2024_1035969_100_SI_DTU_56B_SE.fq.gz_flye.fasta	DTU_2024_1035969_100_SI_DTU_56B_SE.fq.gz_flye_contig_16	968232	969464	-	mdf(A)_1	1-1233/1233	===============	0/0	100	98.46	resfinder	Y08743	mdf(A)
DTU_2024_1035969_100_SI_DTU_56B_SE.fq.gz_flye.fasta	DTU_2024_1035969_100_SI_DTU_56B_SE.fq.gz_flye_contig_26	14753	15720	+	ant(3'')-Ia_1	1-972/972	========/======	2025-04-02	99.59	97.43	resfinder	X02340	ant(3'')-Ia	Streptomycin
DTU_2024_1035969_100_SI_DTU_56B_SE.fq.gz_flye.fasta	DTU_2024_1035969_100_SI_DTU_56B_SE.fq.gz_flye_contig_28	48660	49520	+	blaTEM-1B_1	1-861/861	===============	0/0	100	100	resfinder	AY458016	blaTEM-1B	Amoxicillin;Ampicillin;Cephalothin;Piperacillin;Ticarcillin
DTU_2024_1035969_100_SI_DTU_56B_SE.fq.gz_flye.fasta	DTU_2024_1035969_100_SI_DTU_56B_SE.fq.gz_flye_contig_28	52737	53552	+	sul2_3	1-816/816	===============	0/0	100	100	resfinder	HQ840942	sul2	Sulfamethoxazole
DTU_2024_1035969_100_SI_DTU_56B_SE.fq.gz_flye.fasta	DTU_2024_1035969_100_SI_DTU_56B_SE.fq.gz_flye_contig_28	53613	54416	+	aph(3'')-Ib_5	1-804/804	===============	0/0	100	100	resfinder	AF321551	aph(3'')-Ib	Streptomycin
DTU_2024_1035969_100_SI_DTU_56B_SE.fq.gz_flye.fasta	DTU_2024_1035969_100_SI_DTU_56B_SE.fq.gz_flye_contig_28	54416	55252	+	aph(6)-Id_1	1-837/837	===============	0/0	100	100	resfinder	M28829	aph(6)-Id	Streptomycin
DTU_2024_1035969_100_SI_DTU_56B_SE.fq.gz_flye.fasta	DTU_2024_1035969_100_SI_DTU_56B_SE.fq.gz_flye_contig_28	56499	56972	+	dfrA1_10	1-474/474	===============	0/0	100	99.79	resfinder	AF203818	dfrA1	Trimethoprim
DTU_2024_1035969_100_SI_DTU_56B_SE.fq.gz_flye.fasta	DTU_2024_1035969_100_SI_DTU_56B_SE.fq.gz_flye_contig_28	58334	59200	+	sul1_5	1-867/867	===============	0/0	100	99.89	resfinder	EU780013	sul1	Sulfamethoxazole
DTU_2024_1035969_100_SI_DTU_56B_SE.fq.gz_flye.fasta	DTU_2024_1035969_100_SI_DTU_56B_SE.fq.gz_flye_contig_28	66933	67840	+	mph(B)_1	1-908/909	===============	0/0	99.89	100	resfinder	D85892	mph(B)	Erythromycin;Spiramycin;Telithromycin
DTU_2024_1035969_100_SI_DTU_56B_SE.fq.gz_flye.fasta	DTU_2024_1035969_100_SI_DTU_56B_SE.fq.gz_flye_contig_28	69595	70841	+	tet(A)_6	1-1247/1275	===============	0/0	97.8	100	resfinder	AF534183	tet(A)	Doxycycline;Tetracycline
DTU_2024_1035970_100_SI_DTU_60C_SE.fq.gz_flye.fasta	DTU_2024_1035970_100_SI_DTU_60C_SE.fq.gz_flye_contig_24	28014	28935	-	mph(A)_2	1-921/921	========/======	2025-01-01	100	99.67	resfinder	U36578	mph(A)	Erythromycin;Azithromycin;Spiramycin;Telithromycin
DTU_2024_1035970_100_SI_DTU_60C_SE.fq.gz_flye.fasta	DTU_2024_1035970_100_SI_DTU_60C_SE.fq.gz_flye_contig_24	30091	30854	+	erm(B)_18	1-762/762	========/======	2025-02-02	100	98.95	resfinder	X66468	erm(B)	Erythromycin;Lincomycin;Clindamycin;Quinupristin;Pristinamycin_IA;Virginiamycin_S
DTU_2024_1035970_100_SI_DTU_60C_SE.fq.gz_flye.fasta	DTU_2024_1035970_100_SI_DTU_60C_SE.fq.gz_flye_contig_31	111486	112718	-	mdf(A)_1	1-1233/1233	===============	0/0	100	98.05	resfinder	Y08743	mdf(A)
DTU_2024_1035971_100_SI_DTU_76C_SE.fq.gz_flye.fasta	DTU_2024_1035971_100_SI_DTU_76C_SE.fq.gz_flye_contig_15	170525	171757	-	mdf(A)_1	1-1233/1233	===============	0/0	100	99.03	resfinder	Y08743	mdf(A)
DTU_2024_1035972_100_SI_DTU_79A_SE.fq.gz_flye.fasta	DTU_2024_1035972_100_SI_DTU_79A_SE.fq.gz_flye_contig_8	78123	79355	-	mdf(A)_1	1-1233/1233	===============	0/0	100	98.46	resfinder	Y08743	mdf(A)
DTU_2024_1035973_100_SI_DTU_80C_SE.fq.gz_flye.fasta	DTU_2024_1035973_100_SI_DTU_80C_SE.fq.gz_flye_contig_15	792663	793895	-	mdf(A)_1	1-1233/1233	===============	0/0	100	99.92	resfinder	Y08743	mdf(A)
DTU_2024_1035973_100_SI_DTU_80C_SE.fq.gz_flye.fasta	DTU_2024_1035973_100_SI_DTU_80C_SE.fq.gz_flye_contig_18	41620	42276	-	qnrS1_1	1-657/657	===============	0/0	100	100	resfinder	AB187515	qnrS1	Ciprofloxacin
DTU_2024_1035973_100_SI_DTU_80C_SE.fq.gz_flye.fasta	DTU_2024_1035973_100_SI_DTU_80C_SE.fq.gz_flye_contig_18	47638	48498	+	blaTEM-1B_1	1-861/861	===============	0/0	100	100	resfinder	AY458016	blaTEM-1B	Amoxicillin;Ampicillin;Cephalothin;Piperacillin;Ticarcillin
DTU_2024_1035973_100_SI_DTU_80C_SE.fq.gz_flye.fasta	DTU_2024_1035973_100_SI_DTU_80C_SE.fq.gz_flye_contig_6	47897	48712	-	aph(3')-Ia_7	1-816/816	===============	0/0	100	100	resfinder	X62115	aph(3')-Ia
DTU_2024_1035973_100_SI_DTU_80C_SE.fq.gz_flye.fasta	DTU_2024_1035973_100_SI_DTU_80C_SE.fq.gz_flye_contig_6	52698	53500	+	aph(3'')-Ib_2	2-804/804	===============	0/0	99.88	100	resfinder	AF024602	aph(3'')-Ib	Streptomycin
DTU_2024_1035973_100_SI_DTU_80C_SE.fq.gz_flye.fasta	DTU_2024_1035973_100_SI_DTU_80C_SE.fq.gz_flye_contig_6	53500	54336	+	aph(6)-Id_1	1-837/837	===============	0/0	100	100	resfinder	M28829	aph(6)-Id	Streptomycin
DTU_2024_1035973_100_SI_DTU_80C_SE.fq.gz_flye.fasta	DTU_2024_1035973_100_SI_DTU_80C_SE.fq.gz_flye_contig_6	58641	59887	-	tet(A)_6	1-1247/1275	===============	0/0	97.8	100	resfinder	AF534183	tet(A)	Doxycycline;Tetracycline
DTU_2024_1035973_100_SI_DTU_80C_SE.fq.gz_flye.fasta	DTU_2024_1035973_100_SI_DTU_80C_SE.fq.gz_flye_contig_6	71254	72162	-	mph(B)_1	1-909/909	===============	0/0	100	100	resfinder	D85892	mph(B)	Erythromycin;Spiramycin;Telithromycin
DTU_2024_1035973_100_SI_DTU_80C_SE.fq.gz_flye.fasta	DTU_2024_1035973_100_SI_DTU_80C_SE.fq.gz_flye_contig_6	79894	80760	-	sul1_5	1-867/867	===============	0/0	100	99.89	resfinder	EU780013	sul1	Sulfamethoxazole
DTU_2024_1035973_100_SI_DTU_80C_SE.fq.gz_flye.fasta	DTU_2024_1035973_100_SI_DTU_80C_SE.fq.gz_flye_contig_6	84098	84571	-	dfrA1_10	1-474/474	===============	0/0	100	99.79	resfinder	AF203818	dfrA1	Trimethoprim
DTU_2024_1035974_100_SI_DTU_82A_SE.fq.gz_flye.fasta	DTU_2024_1035974_100_SI_DTU_82A_SE.fq.gz_flye_contig_11	33048	33863	-	sul2_2	1-816/816	===============	0/0	100	100	resfinder	AY034138	sul2	Sulfamethoxazole
DTU_2024_1035974_100_SI_DTU_82A_SE.fq.gz_flye.fasta	DTU_2024_1035974_100_SI_DTU_82A_SE.fq.gz_flye_contig_11	38685	39545	+	blaTEM-1B_1	1-861/861	===============	0/0	100	100	resfinder	AY458016	blaTEM-1B	Amoxicillin;Ampicillin;Cephalothin;Piperacillin;Ticarcillin
DTU_2024_1035974_100_SI_DTU_82A_SE.fq.gz_flye.fasta	DTU_2024_1035974_100_SI_DTU_82A_SE.fq.gz_flye_contig_18	5411	5884	+	dfrA5_1	1-474/474	===============	0/0	100	100	resfinder	X12868	dfrA5	Trimethoprim
DTU_2024_1035974_100_SI_DTU_82A_SE.fq.gz_flye.fasta	DTU_2024_1035974_100_SI_DTU_82A_SE.fq.gz_flye_contig_18	6891	7706	+	aph(3')-Ia_1	1-816/816	===============	0/0	100	100	resfinder	V00359	aph(3')-Ia
DTU_2024_1035974_100_SI_DTU_82A_SE.fq.gz_flye.fasta	DTU_2024_1035974_100_SI_DTU_82A_SE.fq.gz_flye_contig_18	16614	17860	+	tet(A)_6	1-1247/1275	===============	0/0	97.8	100	resfinder	AF534183	tet(A)	Doxycycline;Tetracycline
DTU_2024_1035974_100_SI_DTU_82A_SE.fq.gz_flye.fasta	DTU_2024_1035974_100_SI_DTU_82A_SE.fq.gz_flye_contig_3	888210	889442	+	mdf(A)_1	1-1233/1233	===============	0/0	100	99.92	resfinder	Y08743	mdf(A)
DTU_2024_1035975_100_SI_DTU_83A_SE.fq.gz_flye.fasta	DTU_2024_1035975_100_SI_DTU_83A_SE.fq.gz_flye_contig_13	86180	87040	-	blaTEM-1B_1	1-861/861	===============	0/0	100	100	resfinder	AY458016	blaTEM-1B	Amoxicillin;Ampicillin;Cephalothin;Piperacillin;Ticarcillin
DTU_2024_1035975_100_SI_DTU_83A_SE.fq.gz_flye.fasta	DTU_2024_1035975_100_SI_DTU_83A_SE.fq.gz_flye_contig_13	91862	92677	+	sul2_2	1-816/816	===============	0/0	100	100	resfinder	AY034138	sul2	Sulfamethoxazole
DTU_2024_1035975_100_SI_DTU_83A_SE.fq.gz_flye.fasta	DTU_2024_1035975_100_SI_DTU_83A_SE.fq.gz_flye_contig_13	278731	279963	-	mdf(A)_1	1-1233/1233	===============	0/0	100	99.92	resfinder	Y08743	mdf(A)
DTU_2024_1035975_100_SI_DTU_83A_SE.fq.gz_flye.fasta	DTU_2024_1035975_100_SI_DTU_83A_SE.fq.gz_flye_contig_18	18504	18977	+	dfrA5_1	1-474/474	===============	0/0	100	100	resfinder	X12868	dfrA5	Trimethoprim
DTU_2024_1035975_100_SI_DTU_83A_SE.fq.gz_flye.fasta	DTU_2024_1035975_100_SI_DTU_83A_SE.fq.gz_flye_contig_18	19984	20799	+	aph(3')-Ia_1	1-816/816	===============	0/0	100	100	resfinder	V00359	aph(3')-Ia
DTU_2024_1035975_100_SI_DTU_83A_SE.fq.gz_flye.fasta	DTU_2024_1035975_100_SI_DTU_83A_SE.fq.gz_flye_contig_18	29707	30953	+	tet(A)_6	1-1247/1275	===============	0/0	97.8	100	resfinder	AF534183	tet(A)	Doxycycline;Tetracycline
DTU_2024_1035976_100_SI_DTU_88A_SE.fq.gz_flye.fasta	DTU_2024_1035976_100_SI_DTU_88A_SE.fq.gz_flye_contig_3	659515	660747	-	mdf(A)_1	1-1233/1233	===============	0/0	100	99.92	resfinder	Y08743	mdf(A)
DTU_2024_1035977_100_SI_DTU_101B_SE.fq.gz_flye.fasta	DTU_2024_1035977_100_SI_DTU_101B_SE.fq.gz_flye_contig_1	306900	308132	+	mdf(A)_1	1-1233/1233	===============	0/0	100	98.05	resfinder	Y08743	mdf(A)
DTU_2024_1036880_100_MG_LVK_11_SE.metabat2.bin.251.fa	DTU_2024_1036880_100_MG_LVK_11_SE:_contig_10044	154647	155879	+	mdf(A)_1	1-1233/1233	===============	0/0	100	99.19	resfinder	Y08743	mdf(A)
DTU_2024_1036881_100_MG_LVK_17_SE.metabat2.bin.280.fa	DTU_2024_1036881_100_MG_LVK_17_SE:_contig_20170	196047	197279	-	mdf(A)_1	1-1233/1233	===============	0/0	100	99.92	resfinder	Y08743	mdf(A)
DTU_2024_1036883_100_MG_LVK_43_SE.metabat2.bin.292.fa	DTU_2024_1036883_100_MG_LVK_43_SE:_contig_13500	76332	77564	+	mdf(A)_1	1-1233/1233	===============	0/0	100	98.46	resfinder	Y08743	mdf(A)
DTU_2024_1036884_100_MG_LVK_48_SE.metabat2.bin.50.fa	DTU_2024_1036884_100_MG_LVK_48_SE:_contig_8699	2684145	2685377	+	mdf(A)_1	1-1233/1233	===============	0/0	100	98.05	resfinder	Y08743	mdf(A)
DTU_2024_1036886_100_MG_LVK_56_SE.metabat2.bin.463.fa	DTU_2024_1036886_100_MG_LVK_56_SE:_contig_18906	152198	153430	+	mdf(A)_1	1-1233/1233	===============	0/0	100	99.35	resfinder	Y08743	mdf(A)
DTU_2024_1036886_100_MG_LVK_56_SE.metabat2.bin.463.fa	DTU_2024_1036886_100_MG_LVK_56_SE:_contig_8181	15992	16755	+	erm(B)_18	1-762/762	========/======	2025-02-02	100	98.95	resfinder	X66468	erm(B)	Erythromycin;Lincomycin;Clindamycin;Quinupristin;Pristinamycin_IA;Virginiamycin_S
DTU_2024_1036886_100_MG_LVK_56_SE.metabat2.bin.463.fa	DTU_2024_1036886_100_MG_LVK_56_SE:_contig_8181	19985	20952	+	ant(3'')-Ia_1	1-972/972	========/======	2025-04-02	99.59	97.43	resfinder	X02340	ant(3'')-Ia	Streptomycin
DTU_2024_1036889_100_MG_LVK_74_SE.metabat2.bin.192.fa	DTU_2024_1036889_100_MG_LVK_74_SE:_contig_14591	4609	5841	-	mdf(A)_1	1-1233/1233	===============	0/0	100	98.86	resfinder	Y08743	mdf(A)
DTU_2024_1036892_100_MG_LVK_80_SE.metabat2.bin.175.fa	DTU_2024_1036892_100_MG_LVK_80_SE:_contig_4599	182285	183517	-	mdf(A)_1	1-1233/1233	===============	0/0	100	99.92	resfinder	Y08743	mdf(A)
DTU_2024_1036893_100_MG_LVK_82_SE.metabat2.bin.124.fa	DTU_2024_1036893_100_MG_LVK_82_SE:_contig_17865	161354	162586	+	mdf(A)_1	1-1233/1233	===============	0/0	100	99.76	resfinder	Y08743	mdf(A)
DTU_2024_1036894_100_MG_LVK_83_SE.metabat2.bin.299.fa	DTU_2024_1036894_100_MG_LVK_83_SE:_contig_2461	267275	268507	+	mdf(A)_1	1-1233/1233	===============	0/0	100	99.92	resfinder	Y08743	mdf(A)
DTU_2024_1036895_100_MG_LVK_88_SE.metabat2.bin.182.fa	DTU_2024_1036895_100_MG_LVK_88_SE:_contig_58215	33756	34988	+	mdf(A)_1	1-1233/1233	===============	0/0	100	99.92	resfinder	Y08743	mdf(A)
DTU_2024_1036897_100_MG_LVK_97_SE.metabat2.bin.79.fa	DTU_2024_1036897_100_MG_LVK_97_SE:_contig_3139	3292	4176	-	mph(G)_1	1-885/885	===============	0/0	100	99.89	resfinder	AB571865	mph(G)
DTU_2024_1036897_100_MG_LVK_97_SE.metabat2.bin.79.fa	DTU_2024_1036897_100_MG_LVK_97_SE:_contig_3139	4181	5404	-	mef(C)_1	1-1224/1224	===============	0/0	100	99.92	resfinder	AB571865	mef(C)
DTU_2024_1036897_100_MG_LVK_97_SE.metabat2.bin.79.fa	DTU_2024_1036897_100_MG_LVK_97_SE:_contig_3139	5692	6508	-	sul2_2	1-816/816	========/======	2025-01-01	100	99.88	resfinder	AY034138	sul2	Sulfamethoxazole
DTU_2024_1036897_100_MG_LVK_97_SE.metabat2.bin.79.fa	DTU_2024_1036897_100_MG_LVK_97_SE:_contig_4927	20153	21385	-	mdf(A)_1	1-1233/1233	===============	0/0	100	99.51	resfinder	Y08743	mdf(A)
DTU_2025_1037644_100_MG_LVK_18_SE.metabat2.bin.169.fa	DTU_2025_1037644_100_MG_LVK_18_SE:_contig_36353	45951	47183	+	mdf(A)_1	1-1233/1233	===============	0/0	100	98.78	resfinder	Y08743	mdf(A)
