# Supplementary material for: Metagenomics provides broad detection of pathogens, antimicrobial resistance, and virulence genes in pig diarrhoea and complement conventional methods
Source: Research Square preprint supplement (doi:10.21203/rs.3.rs-8285969/v1), 2025-12-19
Supplement: Supplementary file 3 [file 598e6c97715d20e091d281ad.xlsx]

## Sheet: #contigs
Sample	Contigs
CP_11D	96
CP_43C	3
CP_52B	42
CP_60B	10
CP_61B	5
CP_83B	3
CP_94C	6
CP_97A	34
CP_102A	35	26	30.5287
EC_DTU_60C	32
EC_LVK_80	29
EC_LVK_102	37
EC_LVK_43	9
EC_LVK_103	10
EC_DTU_42C	70
EC_LVK_97	35
EC_DTU_48A	26
EC_DTU_88A	10
EC_LVK_74	28
EC_DTU_80C	14
EC_LVK_48	23
EC_DTU_52A	28
EC_DTU_76C	38
EC_DTU_56B	24
EC_DTU_83A	20
EC_LVK_11	27
EC_DTU_79A	23
EC_LVK_98	36
EC_LVK_61	21
EC_LVK_94	29
EC_LVK_83	16
EC_DTU_101B	8
EC_DTU_82A	15
EC_LVK_17	24
EC_LVK_60	42	25.9231	13.081

## Sheet: genome_size
Sample	Total_Size
CP_11D	3648677
CP_43C	3379373
CP_52B	3417615
CP_60B	3467946
CP_61B	3389670
CP_83B	3417258
CP_94C	3480086
CP_97A	3443571
CP_102A	3532358	3.46406e+06	84033.6
EC_DTU_60C	5535421
EC_LVK_80	6111964
EC_LVK_102	5648906			2.25956e+06
EC_LVK_43	5645424
EC_LVK_103	5250437
EC_DTU_42C	5578220
EC_LVK_97	5661682
EC_DTU_48A	5447700
EC_DTU_88A	5141993
EC_LVK_74	5609424
EC_DTU_80C	5315669
EC_LVK_48	5708843
EC_DTU_52A	5877833
EC_DTU_76C	5374827
EC_DTU_56B	5835153
EC_DTU_83A	5541971
EC_LVK_11	5732284
EC_DTU_79A	5923187
EC_LVK_98	5470704
EC_LVK_61	5190747
EC_LVK_94	5846755
EC_LVK_83	5575722
EC_DTU_101B	5008566
EC_DTU_82A	5546326
EC_LVK_17	5544046
EC_LVK_60	5652234	5.56831e+06	253737	2.22732e+06

## Sheet: coverage
Sample	Average_Coverage
CP_11D	481.229
CP_43C	618.333
CP_52B	559.929
CP_60B	573.2
CP_61B	796.6
CP_83B	543.333
CP_94C	469.333
CP_97A	467.147
CP_102A	402.2	545.701	115.077
EC_DTU_60C	239.219
EC_LVK_80	200.931
EC_LVK_102	327.784
EC_LVK_43	175.889
EC_LVK_103	375
EC_DTU_42C	345.2
EC_LVK_97	316.8
EC_DTU_48A	231.615
EC_DTU_88A	183
EC_LVK_74	169.286
EC_DTU_80C	321.429
EC_LVK_48	173.043
EC_DTU_52A	194.321
EC_DTU_76C	326.421
EC_DTU_56B	191.625
EC_DTU_83A	155.55
EC_LVK_11	337.074
EC_DTU_79A	246.304
EC_LVK_98	365.083
EC_LVK_61	346.714
EC_LVK_94	187.276
EC_LVK_83	160.188
EC_DTU_101B	188.25
EC_DTU_82A	227.4
EC_LVK_17	239.375
EC_LVK_60	342.357	252.582	75.3231

## Sheet: CP_11D
#seq_name	length	cov.	circ.	repeat	mult.	alt_group	graph_path
contig_44	200212	230	N	N	1	*	*,44,*
contig_23	144916	266	N	N	1	*	*,23,-73,-72,-71
contig_19	131143	323	N	N	1	*	*,19,*
contig_2	128396	344	N	N	1	*	*,2,*
contig_41	121660	293	N	N	1	*	*,41,*
contig_8	120615	311	N	N	1	*	8,*
contig_39	117613	291	N	N	1	*	*,39,*
contig_13	111178	368	N	N	1	*	*,13,*
contig_27	97618	205	N	N	1	*	*,27,*
contig_1	87697	216	N	N	1	*	*,1,*
contig_10	83375	258	N	N	1	*	*,10,*
contig_17	80738	373	N	N	1	*	*,17,*
contig_61	78717	236	N	N	1	*	*,61,*
contig_40	74452	238	N	N	1	*	*,40,*
contig_32	68857	393	N	N	1	*	*,32,*
contig_21	67478	338	N	N	1	*	*,21,*
contig_63	66914	352	N	N	1	*	*,63,*
contig_34	65747	529	N	N	2	*	*,34,*
contig_30	64568	301	N	N	1	*	*,30,*
contig_16	63870	380	N	N	1	*	*,16,*
contig_24	63861	353	N	N	1	*	*,24,*
contig_37	61761	303	N	N	1	*	*,37,*
contig_43	53867	258	N	N	1	*	*,43,*
contig_87	53545	276	N	N	1	*	*,87,47
contig_18	52216	345	N	N	1	*	*,18,*
contig_25	50723	304	N	N	1	*	*,25,*
contig_4	47909	300	N	N	1	*	*,4,*
contig_22	46401	316	N	N	1	*	*,22,*
contig_38	46234	373	N	N	1	*	*,38,*
contig_50	46131	219	N	N	1	*	*,-49,50,*
contig_95	45051	249	N	N	1	*	*,95,*
contig_20	44621	363	N	N	1	*	*,20,*
contig_90	43142	226	N	N	1	*	*,90,*
contig_15	43042	383	N	N	1	*	*,15,*
contig_35	42651	365	N	N	1	*	*,35,*
contig_9	40284	383	N	N	1	*	*,9,*
contig_79	39286	357	N	N	1	*	*,77,79,*
contig_12	36284	521	Y	N	2	*	12
contig_48	35159	192	N	N	1	*	*,48,*
contig_7	34539	1134	N	Y	4	*	7
contig_26	33427	323	N	N	1	*	*,26,101
contig_64	30552	253	N	N	1	*	*,64,*
contig_6	30297	300	N	N	1	*	*,6,*
contig_81	30042	289	N	N	1	*	*,81,*
contig_89	29565	335	N	N	1	*	*,89,*
contig_45	28979	321	N	N	1	*	*,45,*
contig_28	28252	356	N	N	1	*	*,28,*
contig_66	27895	314	N	N	1	*	*,66,*
contig_31	27517	356	N	N	1	*	*,31,*
contig_75	26312	519	N	N	2	*	3,75,51
contig_65	25573	244	N	N	1	*	*,65,*
contig_67	24082	338	N	N	1	*	*,67,*
contig_86	23481	308	N	N	1	*	*,86,*
contig_107	22901	181	N	N	1	*	*,107,-88
contig_52	22307	287	N	N	1	*	*,52,*
contig_80	22204	253	N	N	1	*	*,80,*
contig_11	20162	347	N	N	1	*	*,11,*
contig_33	19309	314	N	N	1	*	*,33,*
contig_14	17488	264	N	N	1	*	*,14,*
contig_78	16927	115	N	N	1	*	*,77,78,-77,*
contig_60	15876	242	N	N	1	*	*,60,*
contig_98	15075	386	N	N	1	*	*,98,*
contig_29	14017	352	N	N	1	*	*,29,*
contig_36	13796	244	N	N	1	*	*,36,*
contig_3	12326	847	N	Y	2	*	3
contig_109	12242	1024	Y	Y	3	*	109	plasmid
contig_102	11826	202	N	N	1	*	*,102,*
contig_83	11802	1435	Y	Y	4	*	83	plasmid
contig_85	10958	211	N	N	1	*	*,85,*
contig_92	10560	271	N	N	1	*	*,92,*
contig_108	10399	269	N	N	1	*	*,108,*
contig_110	10308	283	N	N	1	*	*,110,*
contig_51	9640	1592	N	Y	5	*	51
contig_74	6967	231	N	N	1	*	*,74,*
contig_76	6792	247	N	N	1	*	*,76,*
contig_91	5906	308	N	N	1	*	*,91,*
contig_42	5860	139	N	N	1	*	*,42,*
contig_93	5842	196	N	N	1	*	*,93,*
contig_94	5717	252	N	N	2	*	*,94,*
contig_5	4868	139	N	Y	139	*	*,5,*
contig_59	4548	1721	N	Y	6	*	59
contig_105	4159	2122	N	Y	7	*	105
contig_84	4012	258	N	N	1	*	*,84,*
contig_58	3855	1596	N	Y	5	*	58
contig_71	3803	1244	N	Y	4	*	71
contig_99	3035	265	N	N	2	*	*,99,*
contig_57	2867	1024	N	Y	3	*	57
contig_104	2832	1540	N	Y	6	*	104
contig_54	1800	2020	N	Y	7	*	54
contig_103	1545	961	N	Y	3	4	*,103,*
contig_106	1363	1733	N	Y	6	*	106
contig_55	1095	1393	N	Y	4	*	55
contig_82	1039	206	N	N	2	*	*,82,*
contig_68	826	1160	N	Y	4	*	68
contig_62	816	106	N	Y	1	*	*,62,*
contig_56	562	497	N	Y	1	*	56

## Sheet: CP_43C
#seq_name	length	cov.	circ.	repeat	mult.	alt_group	graph_path
contig_1	3255487	311	Y	N	1	*	1
contig_3	63323	533	Y	N	2	*	3
contig_2	60563	1011	Y	Y	3	*	2
contig_2 replicon gene
>CP102303.1:31934-32746 Clostridium perfringens strain JXNC-3B plasmid unnamed1, complete sequence
ATGGCACACATACACTTATTAACTAAAGAACAGTTAGAACAAGAGAAAAGGTTTAATCTCGAAGAAAGAG
ATTTTCATGTCTTAAATCAAATCGAATATAAAGAGTCTAGAAGAAAAGCTCAAAGTATCTTAAGATTTAT
CAGAAAAGGTATTTTATTAAATAATGGATCTTGGAGCATCTCATTTTCTAAAATTCATAAAGATTATAAT
GATTGGGTAAATAAAAAGAAAAAGAAAAGACCAGAACTAAAAAATATAAGCTTAAAACAAATAAAAAATA
TAGTAAATAAATTAAAAGATTTAGGTTTACTTATTATTGAAAATGTAAAGAAAAGAAACTGTTATTTTCT
GCCATTACCCAATAAATTACCCAATAATGAAAACATTACACCCATTGATACAACAAGCATAGAATGTAAT
CAAGCTACTCCTAGGTATATTAGGAATAATAATATAGATATAGATTCTAATAGTAACTCAAAAGAATTTA
ATTCAAACATGTATGAAAAATGTACAAGTCTTGTTGATGTTAGAAATAAAGCTAAAGAGTTACTTAAAGC
TGCAAGAGTTAAAAGTTCTTGGATTAAGAATAAAGTTTTAACAAAATTAAGTGAAAAATATAGAAATATA
ACTGTTAAATTTTTAGAGAGTTATATTAATACAGTCATTGAGAACACTAGAAATACATATTATTCAAATT
ATAGAAAATATATCAATAACAATGCGAACAACAGAGTTTTACCAAACTTTACAGAAAGAAATTATTCAGA
AGATTACTGGAAATACCTAGAAGAAAATTTATGTTTTAATTAA
contig_3 replicon gene
>CP198284.1:c50287-49448 Clostridium perfringens strain 142_4_JF2 plasmid p142_4_1, complete sequence
ATGAAAAAATATATACATCTTTTGACTAAAGAAGAATTTGAAAAGGAAAAACAATACAATCTTACTGAAG
AACAATTTGCTCTATTAGAAGTAATTGATTATGCAGAAGCTAAAAGAAAAGCTCAAAGTATAGCAAGATT
TATGAAGAAAGAAATAATAAATAATAATGGAGCTATCAGTATTTCATTTGCAAAACTTTGTAAAAAATAT
AATGATTGGGTAAATTCTCGCAAAAGATATAGAAAAGAACTAAAAAATATAAAACTAACTCAATTTAAAT
TTACTGTAAATAGATTAGAAGAGTTAGGTCTATTAATCATTTCTAAAAATAAAAATAAAAATCTTTATAC
ATTAGCTCCGACTGAAAAAACGCCCATTTCTGAAAACATTACACCCCCTGAAATACCTAGCTTAGATAGT
AATTCTGAAACTGCTAGGAGTTTAGGTGATGATAATATAGATATAGATTCTTATAGTAACTCTAAACAAG
AGAAACAATTTAATTCTAATATGTATGAAAAATGTACTAGCTTAGTAGATGTGAGAATTAAAGTAAAAGA
GTTACTAAAATTTAAAAGAGTTAAAAGTAACTGGATAAAAGATAAGGTTTTAATTTCTATAACTAAAAAC
TATAGAAATATAACTAAAAAATTCTTAGATTCATATATATTAACATCTATTTCTAATATTCAAGAGCAAT
GCAAAAGAAATTGGCTTAAATATAGAAGAAATCAAAATTTAACTCAACATAATTTTACGCAAAGAGAATA
TAGCAAAGCAGAGATTAAAGAAATTGAAAATATATTAACTAACAATGCTTTTAATATATCATTTGATTAA

## Sheet: CP_52B
#seq_name	length	cov.	circ.	repeat	mult.	alt_group	graph_path
contig_6	415193	448	N	N	1	*	*,6,42
contig_15	287042	497	N	N	1	*	*,15,*
contig_3	285141	414	N	N	1	*	*,3,*
contig_9	266556	502	N	N	1	*	-40,9,*
contig_4	210556	482	N	N	1	*	*,4,*
contig_13	189399	483	N	N	1	*	*,13,*
contig_8	166652	378	N	N	1	*	*,8,*
contig_21	164971	330	N	N	1	*	*,21,*
contig_2	121093	423	N	N	1	*	*,2,*
contig_12	95298	486	N	N	1	*	*,12,*
contig_20	94945	380	N	N	1	*	*,20,*
contig_17	92284	506	N	N	1	*	*,17,*
contig_23	85726	318	N	N	1	*	-45,23,*
contig_11	81139	449	N	N	1	*	*,11,*
contig_16	76864	358	N	N	1	*	*,16,*
contig_25	75943	387	N	N	1	*	*,25,*
contig_34	69741	351	N	N	1	*	*,34,*
contig_5	69055	491	N	N	1	*	*,5,*
contig_24	66207	480	N	N	1	*	*,24,*
contig_14	62567	873	N	Y	2	*	14
contig_7	51597	425	N	N	1	*	*,7,*
contig_18	47733	398	N	N	1	*	*,18,*
contig_10	47318	388	N	N	1	*	*,10,*
contig_28	39445	600	N	N	1	*	*,28,*
contig_32	34933	327	N	N	1	*	*,32,*
contig_19	34457	424	N	N	1	*	*,19,*
contig_26	17128	383	N	N	1	*	*,26,*
contig_22	16341	302	N	N	1	*	*,22,*
contig_30	15473	358	N	N	1	*	*,30,*
contig_27	15263	376	N	N	1	*	*,27,*
contig_37	14896	382	N	N	1	*	*,37,*
contig_44	14624	304	N	N	1	*	*,44,*
contig_38	13438	406	N	N	1	*	*,38,*
contig_31	12830	468	N	N	1	*	*,31,*
contig_46	12321	1091	Y	Y	2	*	46
contig_47	12133	1463	Y	Y	3	*	47
contig_48	11823	1728	Y	Y	4	*	48
contig_36	9039	1806	N	Y	4	*	36
contig_41	7266	372	N	N	1	*	*,41,*
contig_29	6331	273	N	N	1	*	*,29,*
contig_33	6114	377	N	N	1	*	*,33,*
contig_35	740	1830	N	Y	9	*	35

## Sheet: CP_60B
#seq_name	length	cov.	circ.	repeat	mult.	alt_group	graph_path
contig_6	1164953	284	N	N	1	*	*,6,*
contig_4	859972	384	N	N	1	*	*,4,*
contig_3	681773	334	N	N	1	*	*,3,*
contig_5	542971	385	N	N	1	*	*,5,*
contig_2	84863	372	N	N	1	*	*,2,*
contig_8	63291	611	Y	N	2	*	8
contig_10	36277	494	Y	N	1	*	10
contig_11	12125	502	Y	Y	1	*	11
contig_9	11802	1418	Y	Y	4	*	9
contig_12	9919	948	N	Y	3	2	*,12,*

## Sheet: CP_61B
#seq_name	length	cov.	circ.	repeat	mult.	alt_group	graph_path
contig_1	1458988	498	N	N	1	*	*,1,*
contig_2	1215100	500	N	N	1	*	*,2,*
contig_3	667869	384	N	N	1	*	*,3,*
contig_4	29994	537	N	N	1	*	*,4,-5,*
contig_6	17719	2064	Y	Y	4	*	6

## Sheet: CP_83B
#seq_name	length	cov.	circ.	repeat	mult.	alt_group	graph_path
contig_1	3282600	293	Y	N	1	*	1
contig_5	72048	828	Y	Y	3	*	5
contig_2	62610	509	Y	N	2	*	2

## Sheet: CP_94C
#seq_name	length	cov.	circ.	repeat	mult.	alt_group	graph_path
contig_1	3330855	326	N	N	1	*	*,1,*
contig_5	62564	536	Y	N	2	*	5
contig_6	36284	398	Y	N	1	*	6
contig_2	20863	168	N	N	1	*	*,2,*
contig_7	17721	684	Y	N	2	*	7
contig_3	11799	704	Y	N	2	*	3

[truncated: 28 more sheets: CP_97A, CP_102A, EC_DTU_60C, EC_LVK_80, EC_LVK_102, EC_LVK_43, EC_LVK_103, EC_DTU_42C, EC_LVK_97, EC_DTU_48A, EC_DTU_88A, EC_LVK_74, EC_DTU_80C, EC_LVK_48, EC_DTU_52A, EC_DTU_76C, EC_DTU_56B, EC_DTU_83A, EC_LVK_11, EC_DTU_79A …]
