# Supplementary material for: Metagenomics provides broad detection of pathogens, antimicrobial resistance, and virulence genes in pig diarrhoea and complement conventional methods
Source: Research Square preprint supplement (doi:10.21203/rs.3.rs-8285969/v1), 2025-12-19
Supplement: Supplementary file 4 [file a656824d06a1189edf78c2ad.xlsx]

## Sheet: mlst_MAGs
Sample_ID	mlst_scheme	ST	gene1	gene2	gene3	gene4	gene5	gene6	gene7	MAGs completenes
DTU_2024_1036880_100_MG_LVK_11_SE.metabat2.bin.251.fa	ecoli	-	adk(277)	fumC(~364)	gyrB(266)	icd(~749)	mdh(1)	purA(1)	recA(2)	100
DTU_2014_1035953_100_SI_LVK_17_SE.fq.gz_flye.fasta	ecoli	-	adk(10)	fumC(11)	gyrB(4)	icd(8)	mdh(8)	purA(8,8)	recA(2)
DTU_2024_1036881_100_MG_LVK_17_SE.metabat2.bin.280.fa	ecoli	-	adk(10)	fumC(11)	gyrB(902?)	icd(~970)	mdh(8)	purA(8)	recA(44?)	99.81
DTU_2024_1035952_100_SI_LVK_11_SE.fq.gz_flye.fasta	ecoli	118	adk(31)	fumC(4)	gyrB(42)	icd(44)	mdh(15)	purA(33)	recA(17)
DTU_2024_1036882_100_MG_LVK_42_SE.metabat2.bin.437.fa	ecoli	-	adk(6)	fumC(-)	gyrB(3)	icd(-)	mdh(7)	purA(7)	recA(6)	60.63
DTU_2024_1035954_100_SI_LVK_43_SE.fq.gz_flye.fasta	ecoli	3524	adk(12)	fumC(23)	gyrB(155)	icd(12)	mdh(15)	purA(1)	recA(17)
DTU_2024_1036883_100_MG_LVK_43_SE.metabat2.bin.292.fa	ecoli	-	adk(12)	fumC(23)	gyrB(155)	icd(1217?)	mdh(-)	purA(1)	recA(17)	86.06
DTU_2024_1035955_100_SI_LVK_48_SE.fq.gz_flye.fasta	ecoli	641	adk(9)	fumC(6)	gyrB(33)	icd(131)	mdh(24)	purA(8)	recA(7)
DTU_2024_1036884_100_MG_LVK_48_SE.metabat2.bin.50.fa	ecoli	-	adk(9)	fumC(-)	gyrB(33)	icd(131)	mdh(24)	purA(8)	recA(7)	93.69
DTU_2024_1035956_100_SI_LVK_60_SE.fq.gz_flye.fasta	ecoli	641	adk(9)	fumC(6)	gyrB(33)	icd(131)	mdh(24)	purA(8)	recA(7)
DTU_2024_1035957_100_SI_LVK_61_SE.fq.gz_flye.fasta	ecoli	101	adk(43)	fumC(41)	gyrB(15)	icd(18)	mdh(11)	purA(7)	recA(6)
DTU_2024_1035958_100_SI_LVK_74_SE.fq.gz_flye.fasta	ecoli	10	adk(10)	fumC(11)	gyrB(4)	icd(8)	mdh(8)	purA(8)	recA(2)
DTU_2024_1036886_100_MG_LVK_56_SE.metabat2.bin.463.fa	ecoli	-	adk(10)	fumC(4)	gyrB(5)	icd(10)	mdh(~773)	purA(8)	recA(2)	100
DTU_2024_1035959_100_SI_LVK_80_SE.fq.gz_flye.fasta	ecoli	23	adk(6)	fumC(4)	gyrB(12)	icd(1)	mdh(20)	purA(13)	recA(7)
DTU_2024_1035960_100_SI_LVK_83_SE.fq.gz_flye.fasta	ecoli	48	adk(6)	fumC(11)	gyrB(4)	icd(8)	mdh(8)	purA(8)	recA(2)
DTU_2024_1035961_100_SI_LVK_94_SE.fq.gz_flye.fasta	ecoli	100	adk(10)	fumC(27)	gyrB(5)	icd(10)	mdh(12)	purA(9)	recA(2)
DTU_2024_1035962_100_SI_LVK_97_SE.fq.gz_flye.fasta	ecoli	100	adk(10)	fumC(27)	gyrB(5)	icd(10)	mdh(12)	purA(9)	recA(2)
DTU_2024_1036889_100_MG_LVK_74_SE.metabat2.bin.192.fa	ecoli	10	adk(10)	fumC(11)	gyrB(4)	icd(8)	mdh(8)	purA(8)	recA(2)	99.96
DTU_2024_1035963_100_SI_LVK_98_SE.fq.gz_flye.fasta	ecoli	1029	adk(6)	fumC(7)	gyrB(69)	icd(8)	mdh(24)	purA(132)	recA(20)
DTU_2024_1035964_100_SI_LVK_102_SE.fq.gz_flye.fasta	ecoli	3628	adk(10)	fumC(11)	gyrB(351)	icd(8)	mdh(8)	purA(8)	recA(2)
DTU_2024_1035965_100_SI_LVK_103_SE.fq.gz_flye.fasta	ecoli	7053	adk(654)	fumC(84)	gyrB(71)	icd(78)	mdh(52)	purA(57)	recA(2)
DTU_2024_1036892_100_MG_LVK_80_SE.metabat2.bin.175.fa	ecoli	-	adk(6)	fumC(1518?)	gyrB(4)	icd(149)	mdh(~8)	purA(8)	recA(2)	87.91
DTU_2024_1035966_100_SI_DTU_42C_SE.fq.gz_flye.fasta	ecoli	10	adk(10)	fumC(11)	gyrB(4)	icd(8)	mdh(8)	purA(8)	recA(2)
DTU_2024_1035967_100_SI_DTU_48A_SE.fq.gz_flye.fasta	ecoli	772	adk(6)	fumC(11)	gyrB(4)	icd(149)	mdh(8)	purA(8)	recA(2)
DTU_2024_1036893_100_MG_LVK_82_SE.metabat2.bin.124.fa	cfreundii	-	aspC(~171)	clpX(193)	fadD(~112)	mdh(-)	arcA(~111)	dnaG(84)	lysP(~101)	66.51
DTU_2024_1035968_100_SI_DTU_52A_SE.fq.gz_flye.fasta	ecoli	224	adk(6)	fumC(4)	gyrB(33)	icd(16)	mdh(11)	purA(8)	recA(6)
DTU_2024_1036894_100_MG_LVK_83_SE.metabat2.bin.299.fa	ecoli	48	adk(6)	fumC(11)	gyrB(4)	icd(8)	mdh(8)	purA(8)	recA(2)	100
DTU_2024_1035969_100_SI_DTU_56B_SE.fq.gz_flye.fasta	ecoli	224	adk(6)	fumC(4)	gyrB(33)	icd(16)	mdh(11)	purA(8)	recA(6)
DTU_2024_1035970_100_SI_DTU_60C_SE.fq.gz_flye.fasta	ecoli	641	adk(9)	fumC(6)	gyrB(33)	icd(131)	mdh(24)	purA(8)	recA(7)
DTU_2024_1036895_100_MG_LVK_88_SE.metabat2.bin.182.fa	cfreundii	-	aspC(-)	clpX(193)	fadD(112?)	mdh(172)	arcA(114)	dnaG(84)	lysP(101)	72.05
DTU_2024_1035971_100_SI_DTU_76C_SE.fq.gz_flye.fasta	ecoli	1090	adk(18)	fumC(202)	gyrB(27)	icd(182)	mdh(145)	purA(1)	recA(19)
DTU_2024_1036897_100_MG_LVK_97_SE.metabat2.bin.79.fa	ecoli	-	adk(277)	fumC(11)	gyrB(4)	icd(~55)	mdh(8)	purA(8)	recA(2)	90.58
DTU_2024_1035972_100_SI_DTU_79A_SE.fq.gz_flye.fasta	ecoli	20	adk(6)	fumC(4)	gyrB(3)	icd(18)	mdh(7)	purA(7)	recA(6)
DTU_2024_1036898_100_MG_LVK_98_SE.metabat2.bin.158.fa	-	-								54.96
DTU_2024_1035973_100_SI_DTU_80C_SE.fq.gz_flye.fasta	ecoli	772	adk(6)	fumC(11)	gyrB(4)	icd(149)	mdh(8)	purA(8)	recA(2)
DTU_2024_1035974_100_SI_DTU_82A_SE.fq.gz_flye.fasta	ecoli	48	adk(6)	fumC(11)	gyrB(4)	icd(8)	mdh(8)	purA(8)	recA(2)
DTU_2024_1035975_100_SI_DTU_83A_SE.fq.gz_flye.fasta	ecoli	48	adk(6)	fumC(11)	gyrB(4)	icd(8)	mdh(8)	purA(8)	recA(2)
DTU_2024_1035976_100_SI_DTU_88A_SE.fq.gz_flye.fasta	ecoli	10	adk(10)	fumC(11)	gyrB(4)	icd(8)	mdh(8)	purA(8)	recA(2)
DTU_2024_1035977_100_SI_DTU_101B_SE.fq.gz_flye.fasta	ecoli	1161	adk(36)	fumC(44)	gyrB(10)	icd(13)	mdh(17)	purA(10)	recA(25)
DTU_2025_1037644_100_MG_LVK_18_SE.metabat2.bin.169.fa	ecoli	-	adk(6)	fumC(~459)	gyrB(3)	icd(~406)	mdh(7)	purA(7)	recA(2)	92.67
E.coli isolate ID	E. coli MAG ID	Nucleotide identity, %
		No match	< 25	< 50	< 75	> 75
SI_LVK_11	MAG_LVK_11	13.97	0	0.63	13.14	72.26
SI_LVK_17	MAG_LVK_17	18.88	0.11	0.57	4.82	75.61
SI_DTU_42C	MAG_LVK_42	52.86	0.34	0.96	4.88	40.95
SI_LVK_43	MAG_LVK_43	24.79	0.23	0.01	0.01	74.97
SI_LVK_48	MAG_LVK_48	18.68	0	0.01	0	81.31
SI_DTU_56B	MAG_LVK_56	18.22	0.01	0.36	1.67	79.74
SI_LVK_74	MAG_LVK_74	17.77	0	0	0.76	81.47
SI_LVK_80	MAG_LVK_80	27.85	0.09	0.57	3.21	68.29
SI_DTU_80C	MAG_LVK_80	24.8	0.03	0.02	1.66	73.48
SI_DTU_82A	MAG_LVK_82	45.13	0.1	0	0	54.77
SI_LVK_83	MAG_LVK_83	11.26	0	0	1.16	87.58
SI_DTU_83A	MAG_LVK_83	9.73	0	0	0.17
SI_DTU_88A	MAG_LVK_88	38.84	0.07	0.39	2.58	58.13
SI_LVK_97	MAG_LVK_97	23.53	0.45	1.11	6.7	68.21
SI_LVK_98	MAG_LVK_98	53.25	0	1.07	6.33	39.35
aligned with MAUVE in Geneious
