# Supplementary material for: Metagenomics provides broad detection of pathogens, antimicrobial resistance, and virulence genes in pig diarrhoea and complement conventional methods
Source: Research Square preprint supplement (doi:10.21203/rs.3.rs-8285969/v1), 2025-12-19
Supplement: Supplementary file 5 [file abbbcb022ad99ec3c4e2415d.xlsx]

## Sheet: plasmidfinder
#FILE	SEQUENCE	START	END	STRAND	GENE	COVERAGE	COVERAGE_MAP	GAPS	%COVERAGE	%IDENTITY	DATABASE	ACCESSION	PRODUCT	RESISTANCE
DTU_2014_1035953_100_SI_LVK_17_SE.fq.gz_flye.fasta	DTU_2014_1035953_100_SI_LVK_17_SE.fq.gz_flye_contig_15	105908	106044	+	IncI_Gamma_1	5-141/141	===============	0/0	97.16	100	plasmidfinder	AP011954	IncI_Gamma_1_AP011954
DTU_2014_1035953_100_SI_LVK_17_SE.fq.gz_flye.fasta	DTU_2014_1035953_100_SI_LVK_17_SE.fq.gz_flye_contig_20	810	1308	-	IncFIC(FII)_1	1-499/499	===============	0/0	100	98.6	plasmidfinder	AP001918	IncFIC(FII)_1__AP001918
DTU_2014_1035953_100_SI_LVK_17_SE.fq.gz_flye.fasta	DTU_2014_1035953_100_SI_LVK_17_SE.fq.gz_flye_contig_26	22079	22784	-	pEC4115_1	1-706/706	===============	0/0	100	99.43	plasmidfinder	NC_011351	pEC4115_1__NC_011351
DTU_2014_1035953_100_SI_LVK_17_SE.fq.gz_flye.fasta	DTU_2014_1035953_100_SI_LVK_17_SE.fq.gz_flye_contig_28	3888	3997	-	Col440I_1	1-110/114	===============	0/0	96.49	90	plasmidfinder	CP023920.1	Col440I_1__CP023920.1
DTU_2014_1035953_100_SI_LVK_17_SE.fq.gz_flye.fasta	DTU_2014_1035953_100_SI_LVK_17_SE.fq.gz_flye_contig_28	7597	7714	-	ColRNAI_1	1-118/130	==============.	0/0	90.77	92.37	plasmidfinder	DQ298019	ColRNAI_1__DQ298019
DTU_2014_1035953_100_SI_LVK_17_SE.fq.gz_flye.fasta	DTU_2014_1035953_100_SI_LVK_17_SE.fq.gz_flye_contig_5	37368	38049	-	IncFIB(AP001918)_1	1-682/682	===============	0/0	100	96.63	plasmidfinder	AP001918	IncFIB(AP001918)_1__AP001918
DTU_2014_1035953_100_SI_LVK_17_SE.fq.gz_flye.fasta	DTU_2014_1035953_100_SI_LVK_17_SE.fq.gz_flye_contig_5	80483	80981	-	IncFIC(FII)_1	1-499/499	===============	0/0	100	98.6	plasmidfinder	AP001918	IncFIC(FII)_1__AP001918
DTU_2024_1035952_100_SI_LVK_11_SE.fq.gz_flye.fasta	DTU_2024_1035952_100_SI_LVK_11_SE.fq.gz_flye_contig_11	49442	49815	-	IncX1_1	1-374/374	===============	0/0	100	98.66	plasmidfinder	EU370913	IncX1_1__EU370913
DTU_2024_1035952_100_SI_LVK_11_SE.fq.gz_flye.fasta	DTU_2024_1035952_100_SI_LVK_11_SE.fq.gz_flye_contig_15	588582	588955	+	IncX4_1	1-374/374	===============	0/0	100	100	plasmidfinder	CP002895	IncX4_1__CP002895
DTU_2024_1035952_100_SI_LVK_11_SE.fq.gz_flye.fasta	DTU_2024_1035952_100_SI_LVK_11_SE.fq.gz_flye_contig_18	21027	21400	-	IncX4_1	1-374/374	===============	0/0	100	100	plasmidfinder	CP002895	IncX4_1__CP002895
DTU_2024_1035952_100_SI_LVK_11_SE.fq.gz_flye.fasta	DTU_2024_1035952_100_SI_LVK_11_SE.fq.gz_flye_contig_24	14335	14476	-	IncI1_1_Alpha	1-142/142	===============	0/0	100	100	plasmidfinder	AP005147	IncI1_1_Alpha_AP005147
DTU_2024_1035952_100_SI_LVK_11_SE.fq.gz_flye.fasta	DTU_2024_1035952_100_SI_LVK_11_SE.fq.gz_flye_contig_36	39606	39927	+	IncI2_1_Delta	1-316/316	========/======	2025-06-01	100	97.52	plasmidfinder	AP002527	IncI2_1_Delta_AP002527
DTU_2024_1035952_100_SI_LVK_11_SE.fq.gz_flye.fasta	DTU_2024_1035952_100_SI_LVK_11_SE.fq.gz_flye_contig_9	16654	16914	+	IncFII_1	1-261/261	===============	0/0	100	100	plasmidfinder	AY458016	IncFII_1__AY458016
DTU_2024_1035954_100_SI_LVK_43_SE.fq.gz_flye.fasta	DTU_2024_1035954_100_SI_LVK_43_SE.fq.gz_flye_contig_10	53064	53828	-	IncY_1	1-765/765	===============	0/0	100	98.95	plasmidfinder	K02380	IncY_1__K02380
DTU_2024_1035954_100_SI_LVK_43_SE.fq.gz_flye.fasta	DTU_2024_1035954_100_SI_LVK_43_SE.fq.gz_flye_contig_11	71614	72295	+	IncFIB(AP001918)_1	1-682/682	===============	0/0	100	99.27	plasmidfinder	AP001918	IncFIB(AP001918)_1__AP001918
DTU_2024_1035954_100_SI_LVK_43_SE.fq.gz_flye.fasta	DTU_2024_1035954_100_SI_LVK_43_SE.fq.gz_flye_contig_11	121448	121589	-	IncI1_1_Alpha	1-142/142	===============	0/0	100	100	plasmidfinder	AP005147	IncI1_1_Alpha_AP005147
DTU_2024_1035954_100_SI_LVK_43_SE.fq.gz_flye.fasta	DTU_2024_1035954_100_SI_LVK_43_SE.fq.gz_flye_contig_12	39027	39400	-	IncX4_1	1-374/374	===============	0/0	100	100	plasmidfinder	CP002895	IncX4_1__CP002895
DTU_2024_1035954_100_SI_LVK_43_SE.fq.gz_flye.fasta	DTU_2024_1035954_100_SI_LVK_43_SE.fq.gz_flye_contig_2	146768	147397	-	IncHI2A_1	1-630/630	===============	0/0	100	99.52	plasmidfinder	BX664015	IncHI2A_1__BX664015
DTU_2024_1035954_100_SI_LVK_43_SE.fq.gz_flye.fasta	DTU_2024_1035954_100_SI_LVK_43_SE.fq.gz_flye_contig_2	164683	165009	+	IncHI2_1	1-327/327	===============	0/0	100	100	plasmidfinder	BX664015	IncHI2_1__BX664015
DTU_2024_1035954_100_SI_LVK_43_SE.fq.gz_flye.fasta	DTU_2024_1035954_100_SI_LVK_43_SE.fq.gz_flye_contig_5	26345	26718	+	IncX1_1	1-374/374	===============	0/0	100	98.66	plasmidfinder	EU370913	IncX1_1__EU370913
DTU_2024_1035955_100_SI_LVK_48_SE.fq.gz_flye.fasta	DTU_2024_1035955_100_SI_LVK_48_SE.fq.gz_flye_contig_11	156239	156380	-	IncI1_1_Alpha	1-142/142	===============	0/0	100	100	plasmidfinder	AP005147	IncI1_1_Alpha_AP005147
DTU_2024_1035955_100_SI_LVK_48_SE.fq.gz_flye.fasta	DTU_2024_1035955_100_SI_LVK_48_SE.fq.gz_flye_contig_13	1896	2392	-	IncFIC(FII)_1	1-499/499	========/======	2025-02-01	99.6	93.59	plasmidfinder	AP001918	IncFIC(FII)_1__AP001918
DTU_2024_1035955_100_SI_LVK_48_SE.fq.gz_flye.fasta	DTU_2024_1035955_100_SI_LVK_48_SE.fq.gz_flye_contig_13	40462	41143	+	IncFIB(AP001918)_1	1-682/682	===============	0/0	100	97.65	plasmidfinder	AP001918	IncFIB(AP001918)_1__AP001918
DTU_2024_1035955_100_SI_LVK_48_SE.fq.gz_flye.fasta	DTU_2024_1035955_100_SI_LVK_48_SE.fq.gz_flye_contig_26	6202	6589	-	IncFIA(HI1)_1_HI1	1-386/388	========/======	2025-02-01	99.48	94.33	plasmidfinder	AF250878	IncFIA(HI1)_1_HI1_AF250878
DTU_2024_1035955_100_SI_LVK_48_SE.fq.gz_flye.fasta	DTU_2024_1035955_100_SI_LVK_48_SE.fq.gz_flye_contig_30	37065	37388	+	IncI2_1	1-324/324	===============	0/0	100	99.38	plasmidfinder	KP347127	IncI2_1__KP347127
DTU_2024_1035956_100_SI_LVK_60_SE.fq.gz_flye.fasta	DTU_2024_1035956_100_SI_LVK_60_SE.fq.gz_flye_contig_41	29087	29851	-	IncY_1	1-765/765	===============	0/0	100	99.22	plasmidfinder	K02380	IncY_1__K02380
DTU_2024_1035956_100_SI_LVK_60_SE.fq.gz_flye.fasta	DTU_2024_1035956_100_SI_LVK_60_SE.fq.gz_flye_contig_43	55722	56037	+	IncI2_1_Delta	1-316/316	===============	0/0	100	98.1	plasmidfinder	AP002527	IncI2_1_Delta_AP002527
DTU_2024_1035957_100_SI_LVK_61_SE.fq.gz_flye.fasta	DTU_2024_1035957_100_SI_LVK_61_SE.fq.gz_flye_contig_15	45162	45303	+	IncI1_1_Alpha	1-142/142	===============	0/0	100	100	plasmidfinder	AP005147	IncI1_1_Alpha_AP005147
DTU_2024_1035957_100_SI_LVK_61_SE.fq.gz_flye.fasta	DTU_2024_1035957_100_SI_LVK_61_SE.fq.gz_flye_contig_16	13812	14072	+	IncFII_1	1-261/261	===============	0/0	100	100	plasmidfinder	AY458016	IncFII_1__AY458016
DTU_2024_1035957_100_SI_LVK_61_SE.fq.gz_flye.fasta	DTU_2024_1035957_100_SI_LVK_61_SE.fq.gz_flye_contig_17	46755	47436	+	IncFIB(AP001918)_1	1-682/682	===============	0/0	100	98.83	plasmidfinder	AP001918	IncFIB(AP001918)_1__AP001918
DTU_2024_1035957_100_SI_LVK_61_SE.fq.gz_flye.fasta	DTU_2024_1035957_100_SI_LVK_61_SE.fq.gz_flye_contig_17	108218	108714	+	IncFIC(FII)_1	1-499/499	========/======	2025-02-01	99.6	95.59	plasmidfinder	AP001918	IncFIC(FII)_1__AP001918
DTU_2024_1035958_100_SI_LVK_74_SE.fq.gz_flye.fasta	DTU_2024_1035958_100_SI_LVK_74_SE.fq.gz_flye_contig_31	34361	34734	+	IncX1_1	1-374/374	===============	0/0	100	98.93	plasmidfinder	EU370913	IncX1_1__EU370913
DTU_2024_1035958_100_SI_LVK_74_SE.fq.gz_flye.fasta	DTU_2024_1035958_100_SI_LVK_74_SE.fq.gz_flye_contig_36	6751	7432	-	IncFIB(AP001918)_1	1-682/682	===============	0/0	100	96.63	plasmidfinder	AP001918	IncFIB(AP001918)_1__AP001918
DTU_2024_1035958_100_SI_LVK_74_SE.fq.gz_flye.fasta	DTU_2024_1035958_100_SI_LVK_74_SE.fq.gz_flye_contig_36	81427	81925	-	IncFIC(FII)_1	1-499/499	===============	0/0	100	98.4	plasmidfinder	AP001918	IncFIC(FII)_1__AP001918
DTU_2024_1035958_100_SI_LVK_74_SE.fq.gz_flye.fasta	DTU_2024_1035958_100_SI_LVK_74_SE.fq.gz_flye_contig_4	178275	178601	+	IncHI2_1	1-327/327	===============	0/0	100	100	plasmidfinder	BX664015	IncHI2_1__BX664015
DTU_2024_1035958_100_SI_LVK_74_SE.fq.gz_flye.fasta	DTU_2024_1035958_100_SI_LVK_74_SE.fq.gz_flye_contig_4	227467	228096	+	IncHI2A_1	1-630/630	===============	0/0	100	99.52	plasmidfinder	BX664015	IncHI2A_1__BX664015
DTU_2024_1035959_100_SI_LVK_80_SE.fq.gz_flye.fasta	DTU_2024_1035959_100_SI_LVK_80_SE.fq.gz_flye_contig_12	52042	52183	+	IncI1_1_Alpha	1-142/142	===============	0/0	100	99.3	plasmidfinder	AP005147	IncI1_1_Alpha_AP005147
DTU_2024_1035959_100_SI_LVK_80_SE.fq.gz_flye.fasta	DTU_2024_1035959_100_SI_LVK_80_SE.fq.gz_flye_contig_25	18176	18857	+	IncFIB(AP001918)_1	1-682/682	===============	0/0	100	99.27	plasmidfinder	AP001918	IncFIB(AP001918)_1__AP001918
DTU_2024_1035959_100_SI_LVK_80_SE.fq.gz_flye.fasta	DTU_2024_1035959_100_SI_LVK_80_SE.fq.gz_flye_contig_25	64620	64993	+	IncX1_1	1-374/374	===============	0/0	100	98.66	plasmidfinder	EU370913	IncX1_1__EU370913
DTU_2024_1035959_100_SI_LVK_80_SE.fq.gz_flye.fasta	DTU_2024_1035959_100_SI_LVK_80_SE.fq.gz_flye_contig_26	29781	30545	-	IncY_1	1-765/765	===============	0/0	100	99.87	plasmidfinder	K02380	IncY_1__K02380
DTU_2024_1035959_100_SI_LVK_80_SE.fq.gz_flye.fasta	DTU_2024_1035959_100_SI_LVK_80_SE.fq.gz_flye_contig_28	4132	4447	-	IncI2_1_Delta	1-316/316	===============	0/0	100	98.1	plasmidfinder	AP002527	IncI2_1_Delta_AP002527
DTU_2024_1035959_100_SI_LVK_80_SE.fq.gz_flye.fasta	DTU_2024_1035959_100_SI_LVK_80_SE.fq.gz_flye_contig_32	10112	10610	-	IncFIC(FII)_1	1-499/499	===============	0/0	100	98.6	plasmidfinder	AP001918	IncFIC(FII)_1__AP001918
DTU_2024_1035960_100_SI_LVK_83_SE.fq.gz_flye.fasta	DTU_2024_1035960_100_SI_LVK_83_SE.fq.gz_flye_contig_10	11220	11356	-	IncI_Gamma_1	5-141/141	===============	0/0	97.16	100	plasmidfinder	AP011954	IncI_Gamma_1_AP011954
DTU_2024_1035960_100_SI_LVK_83_SE.fq.gz_flye.fasta	DTU_2024_1035960_100_SI_LVK_83_SE.fq.gz_flye_contig_11	34475	35156	+	IncFIB(AP001918)_1	1-682/682	===============	0/0	100	98.83	plasmidfinder	AP001918	IncFIB(AP001918)_1__AP001918
DTU_2024_1035960_100_SI_LVK_83_SE.fq.gz_flye.fasta	DTU_2024_1035960_100_SI_LVK_83_SE.fq.gz_flye_contig_18	12808	13131	+	IncI2_1	1-324/324	===============	0/0	100	99.38	plasmidfinder	KP347127	IncI2_1__KP347127
DTU_2024_1035960_100_SI_LVK_83_SE.fq.gz_flye.fasta	DTU_2024_1035960_100_SI_LVK_83_SE.fq.gz_flye_contig_4	62783	62919	-	IncI_Gamma_1	5-141/141	===============	0/0	97.16	100	plasmidfinder	AP011954	IncI_Gamma_1_AP011954
DTU_2024_1035960_100_SI_LVK_83_SE.fq.gz_flye.fasta	DTU_2024_1035960_100_SI_LVK_83_SE.fq.gz_flye_contig_6	3195	3336	+	IncI1_1_Alpha	1-142/142	===============	0/0	100	99.3	plasmidfinder	AP005147	IncI1_1_Alpha_AP005147
DTU_2024_1035961_100_SI_LVK_94_SE.fq.gz_flye.fasta	DTU_2024_1035961_100_SI_LVK_94_SE.fq.gz_flye_contig_12	19629	19889	-	IncFII_1	1-261/261	===============	0/0	100	100	plasmidfinder	AY458016	IncFII_1__AY458016
DTU_2024_1035961_100_SI_LVK_94_SE.fq.gz_flye.fasta	DTU_2024_1035961_100_SI_LVK_94_SE.fq.gz_flye_contig_13	16550	17231	-	IncFIB(AP001918)_1	1-682/682	===============	0/0	100	99.27	plasmidfinder	AP001918	IncFIB(AP001918)_1__AP001918
DTU_2024_1035961_100_SI_LVK_94_SE.fq.gz_flye.fasta	DTU_2024_1035961_100_SI_LVK_94_SE.fq.gz_flye_contig_14	4733	5106	-	IncX1_1	1-374/374	===============	0/0	100	98.66	plasmidfinder	EU370913	IncX1_1__EU370913
DTU_2024_1035961_100_SI_LVK_94_SE.fq.gz_flye.fasta	DTU_2024_1035961_100_SI_LVK_94_SE.fq.gz_flye_contig_25	77462	77603	+	IncI1_1_Alpha	1-142/142	===============	0/0	100	100	plasmidfinder	AP005147	IncI1_1_Alpha_AP005147
DTU_2024_1035961_100_SI_LVK_94_SE.fq.gz_flye.fasta	DTU_2024_1035961_100_SI_LVK_94_SE.fq.gz_flye_contig_29	63625	64509	+	p0111_1	1-885/885	===============	0/0	100	99.21	plasmidfinder	AP010962	p0111_1__AP010962
DTU_2024_1035961_100_SI_LVK_94_SE.fq.gz_flye.fasta	DTU_2024_1035961_100_SI_LVK_94_SE.fq.gz_flye_contig_37	17165	17428	-	IncFII(pSE11)_1_pSE11	1-264/264	===============	0/0	100	98.48	plasmidfinder	AP009242	IncFII(pSE11)_1_pSE11_AP009242
DTU_2024_1035961_100_SI_LVK_94_SE.fq.gz_flye.fasta	DTU_2024_1035961_100_SI_LVK_94_SE.fq.gz_flye_contig_6	10922	11309	-	IncFIA_1	1-388/388	===============	0/0	100	99.74	plasmidfinder	AP001918	IncFIA_1__AP001918
DTU_2024_1035962_100_SI_LVK_97_SE.fq.gz_flye.fasta	DTU_2024_1035962_100_SI_LVK_97_SE.fq.gz_flye_contig_4	4592	5273	+	IncFIB(AP001918)_1	1-682/682	===============	0/0	100	99.27	plasmidfinder	AP001918	IncFIB(AP001918)_1__AP001918
DTU_2024_1035962_100_SI_LVK_97_SE.fq.gz_flye.fasta	DTU_2024_1035962_100_SI_LVK_97_SE.fq.gz_flye_contig_43	31677	31818	-	IncI1_1_Alpha	1-142/142	===============	0/0	100	99.3	plasmidfinder	AP005147	IncI1_1_Alpha_AP005147
DTU_2024_1035962_100_SI_LVK_97_SE.fq.gz_flye.fasta	DTU_2024_1035962_100_SI_LVK_97_SE.fq.gz_flye_contig_45	11926	12241	+	IncI2_1_Delta	1-316/316	===============	0/0	100	98.1	plasmidfinder	AP002527	IncI2_1_Delta_AP002527
DTU_2024_1035962_100_SI_LVK_97_SE.fq.gz_flye.fasta	DTU_2024_1035962_100_SI_LVK_97_SE.fq.gz_flye_contig_5	15953	16451	+	IncFIC(FII)_1	1-499/499	===============	0/0	100	98.6	plasmidfinder	AP001918	IncFIC(FII)_1__AP001918
DTU_2024_1035962_100_SI_LVK_97_SE.fq.gz_flye.fasta	DTU_2024_1035962_100_SI_LVK_97_SE.fq.gz_flye_contig_9	84291	85175	+	p0111_1	1-885/885	===============	0/0	100	98.87	plasmidfinder	AP010962	p0111_1__AP010962
DTU_2024_1035963_100_SI_LVK_98_SE.fq.gz_flye.fasta	DTU_2024_1035963_100_SI_LVK_98_SE.fq.gz_flye_contig_17	25348	25606	+	IncFII(29)_1_pUTI89	1-259/259	===============	0/0	100	100	plasmidfinder	CP003035	IncFII(29)_1_pUTI89_CP003035
DTU_2024_1035963_100_SI_LVK_98_SE.fq.gz_flye.fasta	DTU_2024_1035963_100_SI_LVK_98_SE.fq.gz_flye_contig_38	22272	22953	-	IncFIB(AP001918)_1	1-682/682	===============	0/0	100	97.07	plasmidfinder	AP001918	IncFIB(AP001918)_1__AP001918
DTU_2024_1035963_100_SI_LVK_98_SE.fq.gz_flye.fasta	DTU_2024_1035963_100_SI_LVK_98_SE.fq.gz_flye_contig_6	53485	53621	+	IncI_Gamma_1	5-141/141	===============	0/0	97.16	100	plasmidfinder	AP011954	IncI_Gamma_1_AP011954
DTU_2024_1035964_100_SI_LVK_102_SE.fq.gz_flye.fasta	DTU_2024_1035964_100_SI_LVK_102_SE.fq.gz_flye_contig_15	535680	536564	-	p0111_1	1-885/885	===============	0/0	100	98.87	plasmidfinder	AP010962	p0111_1__AP010962
DTU_2024_1035964_100_SI_LVK_102_SE.fq.gz_flye.fasta	DTU_2024_1035964_100_SI_LVK_102_SE.fq.gz_flye_contig_3	5863	6361	+	IncFIC(FII)_1	1-499/499	===============	0/0	100	98.6	plasmidfinder	AP001918	IncFIC(FII)_1__AP001918
DTU_2024_1035964_100_SI_LVK_102_SE.fq.gz_flye.fasta	DTU_2024_1035964_100_SI_LVK_102_SE.fq.gz_flye_contig_3	53707	54388	+	IncFIB(AP001918)_1	1-682/682	===============	0/0	100	96.63	plasmidfinder	AP001918	IncFIB(AP001918)_1__AP001918
DTU_2024_1035964_100_SI_LVK_102_SE.fq.gz_flye.fasta	DTU_2024_1035964_100_SI_LVK_102_SE.fq.gz_flye_contig_8	11908	12613	-	pEC4115_1	1-706/706	===============	0/0	100	99.43	plasmidfinder	NC_011351	pEC4115_1__NC_011351
DTU_2024_1035964_100_SI_LVK_102_SE.fq.gz_flye.fasta	DTU_2024_1035964_100_SI_LVK_102_SE.fq.gz_flye_contig_9	110417	111046	-	IncHI2A_1	1-630/630	===============	0/0	100	100	plasmidfinder	BX664015	IncHI2A_1__BX664015
DTU_2024_1035964_100_SI_LVK_102_SE.fq.gz_flye.fasta	DTU_2024_1035964_100_SI_LVK_102_SE.fq.gz_flye_contig_9	127225	127551	+	IncHI2_1	1-327/327	===============	0/0	100	100	plasmidfinder	BX664015	IncHI2_1__BX664015
DTU_2024_1035965_100_SI_LVK_103_SE.fq.gz_flye.fasta	DTU_2024_1035965_100_SI_LVK_103_SE.fq.gz_flye_contig_12	15987	16360	+	IncX1_1	1-374/374	===============	0/0	100	98.66	plasmidfinder	EU370913	IncX1_1__EU370913
DTU_2024_1035965_100_SI_LVK_103_SE.fq.gz_flye.fasta	DTU_2024_1035965_100_SI_LVK_103_SE.fq.gz_flye_contig_9	55216	55897	+	IncFIB(AP001918)_1	1-682/682	===============	0/0	100	99.12	plasmidfinder	AP001918	IncFIB(AP001918)_1__AP001918
DTU_2024_1035965_100_SI_LVK_103_SE.fq.gz_flye.fasta	DTU_2024_1035965_100_SI_LVK_103_SE.fq.gz_flye_contig_9	72331	72825	+	IncFIC(FII)_1	1-499/499	========/======	2025-06-03	99	95.4	plasmidfinder	AP001918	IncFIC(FII)_1__AP001918
DTU_2024_1035966_100_SI_DTU_42C_SE.fq.gz_flye.fasta	DTU_2024_1035966_100_SI_DTU_42C_SE.fq.gz_flye_contig_27	1679	2177	+	IncFIC(FII)_1	1-499/499	===============	0/0	100	98.6	plasmidfinder	AP001918	IncFIC(FII)_1__AP001918
DTU_2024_1035966_100_SI_DTU_42C_SE.fq.gz_flye.fasta	DTU_2024_1035966_100_SI_DTU_42C_SE.fq.gz_flye_contig_38	6579	7260	+	IncFIB(AP001918)_1	1-682/682	===============	0/0	100	96.63	plasmidfinder	AP001918	IncFIB(AP001918)_1__AP001918
DTU_2024_1035966_100_SI_DTU_42C_SE.fq.gz_flye.fasta	DTU_2024_1035966_100_SI_DTU_42C_SE.fq.gz_flye_contig_39	64489	64630	+	IncI1_1_Alpha	1-142/142	===============	0/0	100	100	plasmidfinder	AP005147	IncI1_1_Alpha_AP005147
DTU_2024_1035966_100_SI_DTU_42C_SE.fq.gz_flye.fasta	DTU_2024_1035966_100_SI_DTU_42C_SE.fq.gz_flye_contig_5	40801	41062	-	IncFII(pCoo)_1_pCoo	1-262/262	===============	0/0	100	97.71	plasmidfinder	CR942285	IncFII(pCoo)_1_pCoo_CR942285
DTU_2024_1035966_100_SI_DTU_42C_SE.fq.gz_flye.fasta	DTU_2024_1035966_100_SI_DTU_42C_SE.fq.gz_flye_contig_64	6006	6115	-	Col440I_1	1-110/114	===============	0/0	96.49	90	plasmidfinder	CP023920.1	Col440I_1__CP023920.1
DTU_2024_1035966_100_SI_DTU_42C_SE.fq.gz_flye.fasta	DTU_2024_1035966_100_SI_DTU_42C_SE.fq.gz_flye_contig_84	41256	41961	-	pEC4115_1	1-706/706	===============	0/0	100	99.43	plasmidfinder	NC_011351	pEC4115_1__NC_011351
DTU_2024_1035967_100_SI_DTU_48A_SE.fq.gz_flye.fasta	DTU_2024_1035967_100_SI_DTU_48A_SE.fq.gz_flye_contig_16	207441	207767	-	IncHI2_1	1-327/327	===============	0/0	100	100	plasmidfinder	BX664015	IncHI2_1__BX664015
DTU_2024_1035967_100_SI_DTU_48A_SE.fq.gz_flye.fasta	DTU_2024_1035967_100_SI_DTU_48A_SE.fq.gz_flye_contig_16	222633	223262	+	IncHI2A_1	1-630/630	===============	0/0	100	100	plasmidfinder	BX664015	IncHI2A_1__BX664015
DTU_2024_1035967_100_SI_DTU_48A_SE.fq.gz_flye.fasta	DTU_2024_1035967_100_SI_DTU_48A_SE.fq.gz_flye_contig_2	39810	40491	+	IncFIB(AP001918)_1	1-682/682	===============	0/0	100	98.83	plasmidfinder	AP001918	IncFIB(AP001918)_1__AP001918
DTU_2024_1035967_100_SI_DTU_48A_SE.fq.gz_flye.fasta	DTU_2024_1035967_100_SI_DTU_48A_SE.fq.gz_flye_contig_26	6404	6545	-	IncI1_1_Alpha	1-142/142	===============	0/0	100	100	plasmidfinder	AP005147	IncI1_1_Alpha_AP005147
DTU_2024_1035967_100_SI_DTU_48A_SE.fq.gz_flye.fasta	DTU_2024_1035967_100_SI_DTU_48A_SE.fq.gz_flye_contig_29	29522	30035	+	IncN_1	1-514/514	===============	0/0	100	100	plasmidfinder	AY046276	IncN_1__AY046276
DTU_2024_1035967_100_SI_DTU_48A_SE.fq.gz_flye.fasta	DTU_2024_1035967_100_SI_DTU_48A_SE.fq.gz_flye_contig_29	49531	49904	-	IncX1_1	1-374/374	===============	0/0	100	98.93	plasmidfinder	EU370913	IncX1_1__EU370913
DTU_2024_1035968_100_SI_DTU_52A_SE.fq.gz_flye.fasta	DTU_2024_1035968_100_SI_DTU_52A_SE.fq.gz_flye_contig_2	830599	830972	+	IncX1_1	1-374/374	===============	0/0	100	98.66	plasmidfinder	EU370913	IncX1_1__EU370913
DTU_2024_1035968_100_SI_DTU_52A_SE.fq.gz_flye.fasta	DTU_2024_1035968_100_SI_DTU_52A_SE.fq.gz_flye_contig_20	47769	48092	+	IncI2_1	1-324/324	===============	0/0	100	99.38	plasmidfinder	KP347127	IncI2_1__KP347127
DTU_2024_1035968_100_SI_DTU_52A_SE.fq.gz_flye.fasta	DTU_2024_1035968_100_SI_DTU_52A_SE.fq.gz_flye_contig_20	87667	88348	-	IncFIB(AP001918)_1	1-682/682	===============	0/0	100	99.27	plasmidfinder	AP001918	IncFIB(AP001918)_1__AP001918
DTU_2024_1035968_100_SI_DTU_52A_SE.fq.gz_flye.fasta	DTU_2024_1035968_100_SI_DTU_52A_SE.fq.gz_flye_contig_31	38345	38486	-	IncI1_1_Alpha	1-142/142	===============	0/0	100	100	plasmidfinder	AP005147	IncI1_1_Alpha_AP005147
DTU_2024_1035968_100_SI_DTU_52A_SE.fq.gz_flye.fasta	DTU_2024_1035968_100_SI_DTU_52A_SE.fq.gz_flye_contig_32	24184	24948	-	IncY_1	1-765/765	===============	0/0	100	99.48	plasmidfinder	K02380	IncY_1__K02380
DTU_2024_1035968_100_SI_DTU_52A_SE.fq.gz_flye.fasta	DTU_2024_1035968_100_SI_DTU_52A_SE.fq.gz_flye_contig_36	86889	87484	-	RepA_1_pKPC-CAV1321	1-596/596	===============	0/0	100	100	plasmidfinder	CP011611	RepA_1_pKPC-CAV1321_CP011611
DTU_2024_1035969_100_SI_DTU_56B_SE.fq.gz_flye.fasta	DTU_2024_1035969_100_SI_DTU_56B_SE.fq.gz_flye_contig_17	1877	2641	+	IncY_1	1-765/765	===============	0/0	100	99.48	plasmidfinder	K02380	IncY_1__K02380
DTU_2024_1035969_100_SI_DTU_56B_SE.fq.gz_flye.fasta	DTU_2024_1035969_100_SI_DTU_56B_SE.fq.gz_flye_contig_24	88446	88819	-	IncX1_1	1-374/374	===============	0/0	100	98.66	plasmidfinder	EU370913	IncX1_1__EU370913
DTU_2024_1035969_100_SI_DTU_56B_SE.fq.gz_flye.fasta	DTU_2024_1035969_100_SI_DTU_56B_SE.fq.gz_flye_contig_25	47360	47683	+	IncI2_1	1-324/324	===============	0/0	100	99.38	plasmidfinder	KP347127	IncI2_1__KP347127
DTU_2024_1035969_100_SI_DTU_56B_SE.fq.gz_flye.fasta	DTU_2024_1035969_100_SI_DTU_56B_SE.fq.gz_flye_contig_25	87258	87939	-	IncFIB(AP001918)_1	1-682/682	===============	0/0	100	99.27	plasmidfinder	AP001918	IncFIB(AP001918)_1__AP001918
DTU_2024_1035969_100_SI_DTU_56B_SE.fq.gz_flye.fasta	DTU_2024_1035969_100_SI_DTU_56B_SE.fq.gz_flye_contig_26	32974	33115	-	IncI1_1_Alpha	1-142/142	===============	0/0	100	100	plasmidfinder	AP005147	IncI1_1_Alpha_AP005147
DTU_2024_1035969_100_SI_DTU_56B_SE.fq.gz_flye.fasta	DTU_2024_1035969_100_SI_DTU_56B_SE.fq.gz_flye_contig_28	29556	30151	-	RepA_1_pKPC-CAV1321	1-596/596	===============	0/0	100	100	plasmidfinder	CP011611	RepA_1_pKPC-CAV1321_CP011611
DTU_2024_1035970_100_SI_DTU_60C_SE.fq.gz_flye.fasta	DTU_2024_1035970_100_SI_DTU_60C_SE.fq.gz_flye_contig_15	66368	67132	-	IncY_1	1-765/765	===============	0/0	100	99.22	plasmidfinder	K02380	IncY_1__K02380
DTU_2024_1035970_100_SI_DTU_60C_SE.fq.gz_flye.fasta	DTU_2024_1035970_100_SI_DTU_60C_SE.fq.gz_flye_contig_9	7069	7384	+	IncI2_1_Delta	1-316/316	===============	0/0	100	98.1	plasmidfinder	AP002527	IncI2_1_Delta_AP002527
DTU_2024_1035971_100_SI_DTU_76C_SE.fq.gz_flye.fasta	DTU_2024_1035971_100_SI_DTU_76C_SE.fq.gz_flye_contig_13	3399	4080	+	IncFIB(AP001918)_1	1-682/682	===============	0/0	100	98.83	plasmidfinder	AP001918	IncFIB(AP001918)_1__AP001918
DTU_2024_1035971_100_SI_DTU_76C_SE.fq.gz_flye.fasta	DTU_2024_1035971_100_SI_DTU_76C_SE.fq.gz_flye_contig_33	12122	12443	+	IncI2_1_Delta	1-316/316	========/======	2025-06-01	100	97.52	plasmidfinder	AP002527	IncI2_1_Delta_AP002527
DTU_2024_1035971_100_SI_DTU_76C_SE.fq.gz_flye.fasta	DTU_2024_1035971_100_SI_DTU_76C_SE.fq.gz_flye_contig_41	66822	66958	-	IncI_Gamma_1	5-141/141	===============	0/0	97.16	100	plasmidfinder	AP011954	IncI_Gamma_1_AP011954
DTU_2024_1035971_100_SI_DTU_76C_SE.fq.gz_flye.fasta	DTU_2024_1035971_100_SI_DTU_76C_SE.fq.gz_flye_contig_42	2972	3485	+	IncN_1	1-514/514	===============	0/0	100	100	plasmidfinder	AY046276	IncN_1__AY046276
DTU_2024_1035971_100_SI_DTU_76C_SE.fq.gz_flye.fasta	DTU_2024_1035971_100_SI_DTU_76C_SE.fq.gz_flye_contig_42	32895	33280	+	IncFIA(HI1)_1_HI1	1-386/388	===============	0/0	99.48	93.78	plasmidfinder	AF250878	IncFIA(HI1)_1_HI1_AF250878
DTU_2024_1035971_100_SI_DTU_76C_SE.fq.gz_flye.fasta	DTU_2024_1035971_100_SI_DTU_76C_SE.fq.gz_flye_contig_42	52717	52976	+	IncFII(pHN7A8)_1_pHN7A8	1-260/260	===============	0/0	100	98.08	plasmidfinder	JN232517	IncFII(pHN7A8)_1_pHN7A8_JN232517
DTU_2024_1035972_100_SI_DTU_79A_SE.fq.gz_flye.fasta	DTU_2024_1035972_100_SI_DTU_79A_SE.fq.gz_flye_contig_17	4860	5541	-	IncFIB(AP001918)_1	1-682/682	===============	0/0	100	97.21	plasmidfinder	AP001918	IncFIB(AP001918)_1__AP001918
DTU_2024_1035972_100_SI_DTU_79A_SE.fq.gz_flye.fasta	DTU_2024_1035972_100_SI_DTU_79A_SE.fq.gz_flye_contig_17	67256	67515	+	IncFII(pHN7A8)_1_pHN7A8	1-260/260	===============	0/0	100	98.08	plasmidfinder	JN232517	IncFII(pHN7A8)_1_pHN7A8_JN232517
DTU_2024_1035972_100_SI_DTU_79A_SE.fq.gz_flye.fasta	DTU_2024_1035972_100_SI_DTU_79A_SE.fq.gz_flye_contig_2	51476	52181	+	pEC4115_1	1-706/706	===============	0/0	100	99.43	plasmidfinder	NC_011351	pEC4115_1__NC_011351
DTU_2024_1035972_100_SI_DTU_79A_SE.fq.gz_flye.fasta	DTU_2024_1035972_100_SI_DTU_79A_SE.fq.gz_flye_contig_20	2396	2526	-	ColRNAI_1	1-130/130	========/======	2025-01-01	100	90.08	plasmidfinder	DQ298019	ColRNAI_1__DQ298019
DTU_2024_1035973_100_SI_DTU_80C_SE.fq.gz_flye.fasta	DTU_2024_1035973_100_SI_DTU_80C_SE.fq.gz_flye_contig_16	26464	27145	+	IncFIB(AP001918)_1	1-682/682	===============	0/0	100	98.83	plasmidfinder	AP001918	IncFIB(AP001918)_1__AP001918
DTU_2024_1035973_100_SI_DTU_80C_SE.fq.gz_flye.fasta	DTU_2024_1035973_100_SI_DTU_80C_SE.fq.gz_flye_contig_18	2823	3196	-	IncX1_1	1-374/374	===============	0/0	100	98.93	plasmidfinder	EU370913	IncX1_1__EU370913
DTU_2024_1035973_100_SI_DTU_80C_SE.fq.gz_flye.fasta	DTU_2024_1035973_100_SI_DTU_80C_SE.fq.gz_flye_contig_5	28969	29110	-	IncI1_1_Alpha	1-142/142	===============	0/0	100	100	plasmidfinder	AP005147	IncI1_1_Alpha_AP005147
DTU_2024_1035974_100_SI_DTU_82A_SE.fq.gz_flye.fasta	DTU_2024_1035974_100_SI_DTU_82A_SE.fq.gz_flye_contig_11	52689	52831	+	IncI_Gamma_1	1-141/141	========/======	2025-02-02	100	97.2	plasmidfinder	AP011954	IncI_Gamma_1_AP011954
DTU_2024_1035974_100_SI_DTU_82A_SE.fq.gz_flye.fasta	DTU_2024_1035974_100_SI_DTU_82A_SE.fq.gz_flye_contig_8	64729	65410	-	IncFIB(AP001918)_1	1-682/682	===============	0/0	100	98.83	plasmidfinder	AP001918	IncFIB(AP001918)_1__AP001918
DTU_2024_1035974_100_SI_DTU_82A_SE.fq.gz_flye.fasta	DTU_2024_1035974_100_SI_DTU_82A_SE.fq.gz_flye_contig_9	5280	5603	+	IncI2_1	1-324/324	===============	0/0	100	99.38	plasmidfinder	KP347127	IncI2_1__KP347127
DTU_2024_1035975_100_SI_DTU_83A_SE.fq.gz_flye.fasta	DTU_2024_1035975_100_SI_DTU_83A_SE.fq.gz_flye_contig_13	72894	73036	+	IncI1_1_Alpha	1-142/142	========/======	2025-01-01	100	98.6	plasmidfinder	AP005147	IncI1_1_Alpha_AP005147
DTU_2024_1035975_100_SI_DTU_83A_SE.fq.gz_flye.fasta	DTU_2024_1035975_100_SI_DTU_83A_SE.fq.gz_flye_contig_15	29616	30297	-	IncFIB(AP001918)_1	1-682/682	===============	0/0	100	98.83	plasmidfinder	AP001918	IncFIB(AP001918)_1__AP001918
DTU_2024_1035975_100_SI_DTU_83A_SE.fq.gz_flye.fasta	DTU_2024_1035975_100_SI_DTU_83A_SE.fq.gz_flye_contig_18	36349	36485	+	IncI_Gamma_1	5-141/141	===============	0/0	97.16	100	plasmidfinder	AP011954	IncI_Gamma_1_AP011954
DTU_2024_1035976_100_SI_DTU_88A_SE.fq.gz_flye.fasta	DTU_2024_1035976_100_SI_DTU_88A_SE.fq.gz_flye_contig_1	2157595	2158224	+	IncHI2A_1	1-630/630	===============	0/0	100	99.52	plasmidfinder	BX664015	IncHI2A_1__BX664015
DTU_2024_1035976_100_SI_DTU_88A_SE.fq.gz_flye.fasta	DTU_2024_1035976_100_SI_DTU_88A_SE.fq.gz_flye_contig_10	10953	11634	-	IncFIB(AP001918)_1	1-682/682	===============	0/0	100	96.63	plasmidfinder	AP001918	IncFIB(AP001918)_1__AP001918
DTU_2024_1035976_100_SI_DTU_88A_SE.fq.gz_flye.fasta	DTU_2024_1035976_100_SI_DTU_88A_SE.fq.gz_flye_contig_10	60683	61181	-	IncFIC(FII)_1	1-499/499	===============	0/0	100	98.6	plasmidfinder	AP001918	IncFIC(FII)_1__AP001918
