# Supplementary material for: Metagenomics provides broad detection of pathogens, antimicrobial resistance, and virulence genes in pig diarrhoea and complement conventional methods
Source: Research Square preprint supplement (doi:10.21203/rs.3.rs-8285969/v1), 2025-12-19
Supplement: Supplementary file 6 [file aca95c331586bc0b8d89c088.xlsx]

## Sheet: blastn_MAGs_only
#FILE	SEQUENCE	START	END	STRAND	GENE	COVERAGE	COVERAGE_MAP	GAPS	%COVERAGE	%IDENTITY	DATABASE	ACCESSION	PRODUCT	RESISTANCE
DTU_2024_1036880_100_MG_LVK_11_SE.metabat2.bin.251.fa	DTU_2024_1036880_100_MG_LVK_11_SE:_contig_10027	151	573	-	gspM	1-423/423	===============	0/0	100	98.11	vfdb	YP_404609	(gspM) general secretion pathway protein M [T2SS (VF0333)] [Shigella dysenteriae Sd197]
DTU_2024_1036880_100_MG_LVK_11_SE.metabat2.bin.251.fa	DTU_2024_1036880_100_MG_LVK_11_SE:_contig_10027	689	1549	-	gspL	1-861/861	===============	0/0	100	98.03	vfdb	YP_404608	(gspL) general secretion pathway protein L [T2SS (VF0333)] [Shigella dysenteriae Sd197]
DTU_2024_1036880_100_MG_LVK_11_SE.metabat2.bin.251.fa	DTU_2024_1036880_100_MG_LVK_11_SE:_contig_10027	1865	2842	-	gspK	1-978/978	===============	0/0	100	98.36	vfdb	YP_404607	(gspK) general secretion pathway protein K [T2SS (VF0333)] [Shigella dysenteriae Sd197]
DTU_2024_1036880_100_MG_LVK_11_SE.metabat2.bin.251.fa	DTU_2024_1036880_100_MG_LVK_11_SE:_contig_10027	2839	3408	-	gspJ	1-570/570	===============	0/0	100	97.37	vfdb	YP_404606	(gspJ) general secretion pathway protein J [T2SS (VF0333)] [Shigella dysenteriae Sd197]
DTU_2024_1036880_100_MG_LVK_11_SE.metabat2.bin.251.fa	DTU_2024_1036880_100_MG_LVK_11_SE:_contig_10027	3441	3812	-	gspI	1-372/372	===============	0/0	100	96.5	vfdb	YP_404605	(gspI) general secretion pathway protein I [T2SS (VF0333)] [Shigella dysenteriae Sd197]
DTU_2024_1036880_100_MG_LVK_11_SE.metabat2.bin.251.fa	DTU_2024_1036880_100_MG_LVK_11_SE:_contig_10027	3809	4339	-	gspH	1-531/531	===============	0/0	100	96.42	vfdb	YP_404604	(gspH) general secretion pathway protein H [T2SS (VF0333)] [Shigella dysenteriae Sd197]
DTU_2024_1036880_100_MG_LVK_11_SE.metabat2.bin.251.fa	DTU_2024_1036880_100_MG_LVK_11_SE:_contig_10027	4376	4831	-	gspG	1-456/456	===============	0/0	100	94.96	vfdb	YP_404603	(gspG) general secretion pathway protein G [T2SS (VF0333)] [Shigella dysenteriae Sd197]
DTU_2024_1036880_100_MG_LVK_11_SE.metabat2.bin.251.fa	DTU_2024_1036880_100_MG_LVK_11_SE:_contig_10027	4872	6071	-	gspF	1-1200/1200	===============	0/0	100	97.33	vfdb	YP_404602	(gspF) general secretion pathway protein F [T2SS (VF0333)] [Shigella dysenteriae Sd197]
DTU_2024_1036880_100_MG_LVK_11_SE.metabat2.bin.251.fa	DTU_2024_1036880_100_MG_LVK_11_SE:_contig_10027	6071	7564	-	gspE	1-1494/1494	===============	0/0	100	96.92	vfdb	YP_404601	(gspE) general secretion pathway protein E [T2SS (VF0333)] [Shigella dysenteriae Sd197]
DTU_2024_1036880_100_MG_LVK_11_SE.metabat2.bin.251.fa	DTU_2024_1036880_100_MG_LVK_11_SE:_contig_10027	7564	9414	-	gspD	1-1836/1836	========/======	2015-01-01	100	98.33	vfdb	YP_404600	(gspD) general secretion pathway protein D [T2SS (VF0333)] [Shigella dysenteriae Sd197]
DTU_2024_1036880_100_MG_LVK_11_SE.metabat2.bin.251.fa	DTU_2024_1036880_100_MG_LVK_11_SE:_contig_10027	9654	10484	-	gspC	1-831/831	===============	0/0	100	97.35	vfdb	YP_404599	(gspC) general secretion pathway protein C [T2SS (VF0333)] [Shigella dysenteriae Sd197]
DTU_2024_1036880_100_MG_LVK_11_SE.metabat2.bin.251.fa	DTU_2024_1036880_100_MG_LVK_11_SE:_contig_10039	99083	99829	-	entA	1-747/747	===============	0/0	100	95.72	vfdb	NP_752614	(entA) 23-dihydro-23-dihydroxybenzoate dehydrogenase [Enterobactin (VF0228)] [Escherichia coli CFT073]
DTU_2024_1036880_100_MG_LVK_11_SE.metabat2.bin.251.fa	DTU_2024_1036880_100_MG_LVK_11_SE:_contig_10039	99829	100686	-	entB	1-858/858	===============	0/0	100	98.48	vfdb	NP_752613	(entB) isochorismatase [Enterobactin (VF0228)] [Escherichia coli CFT073]
DTU_2024_1036880_100_MG_LVK_11_SE.metabat2.bin.251.fa	DTU_2024_1036880_100_MG_LVK_11_SE:_contig_10039	100700	102310	-	entE	1-1611/1611	===============	0/0	100	96.03	vfdb	NP_752612	(entE) 23-dihydroxybenzoate-AMP ligase component of enterobactin synthase multienzyme complex [Enterobactin (VF0228)] [Escherichia coli CFT073]
DTU_2024_1036880_100_MG_LVK_11_SE.metabat2.bin.251.fa	DTU_2024_1036880_100_MG_LVK_11_SE:_contig_10039	102320	103507	-	entC	1-1188/1188	===============	0/0	100	98.48	vfdb	NP_752611	(entC) isochorismate synthase 1 [Enterobactin (VF0228)] [Escherichia coli CFT073]
DTU_2024_1036880_100_MG_LVK_11_SE.metabat2.bin.251.fa	DTU_2024_1036880_100_MG_LVK_11_SE:_contig_10039	103868	104824	+	fepB	1-957/957	===============	0/0	100	98.33	vfdb	NP_752610	(fepB) ferrienterobactin ABC transporter periplasmic binding protein [Enterobactin (VF0228)] [Escherichia coli CFT073]
DTU_2024_1036880_100_MG_LVK_11_SE.metabat2.bin.251.fa	DTU_2024_1036880_100_MG_LVK_11_SE:_contig_10039	104828	106078	-	entS	1-1251/1251	===============	0/0	100	95.84	vfdb	NP_752609	(entS) enterobactin exporter iron-regulated [enterobactin (IA019)] [Escherichia coli CFT073]
DTU_2024_1036880_100_MG_LVK_11_SE.metabat2.bin.251.fa	DTU_2024_1036880_100_MG_LVK_11_SE:_contig_10039	106177	107193	+	fepD	1-1017/1017	===============	0/0	100	96.46	vfdb	NP_752608	(fepD) ferrienterobactin ABC transporter permease [Enterobactin (VF0228)] [Escherichia coli CFT073]
DTU_2024_1036880_100_MG_LVK_11_SE.metabat2.bin.251.fa	DTU_2024_1036880_100_MG_LVK_11_SE:_contig_10039	107190	108182	+	fepG	1-993/993	===============	0/0	100	94.36	vfdb	NP_752607	(fepG) iron-enterobactin ABC transporter permease [Enterobactin (VF0228)] [Escherichia coli CFT073]
DTU_2024_1036880_100_MG_LVK_11_SE.metabat2.bin.251.fa	DTU_2024_1036880_100_MG_LVK_11_SE:_contig_10039	108179	108994	+	fepC	1-816/816	===============	0/0	100	97.92	vfdb	NP_752606	(fepC) ferrienterobactin ABC transporter ATPase [Enterobactin (VF0228)] [Escherichia coli CFT073]
DTU_2024_1036880_100_MG_LVK_11_SE.metabat2.bin.251.fa	DTU_2024_1036880_100_MG_LVK_11_SE:_contig_10039	110368	114222	-	entF	1-3854/3882	========/======	2025-01-01	99.28	96.11	vfdb	NP_752604	(entF) enterobactin synthase multienzyme complex component ATP-dependent [Enterobactin (VF0228)] [Escherichia coli CFT073]
DTU_2024_1036880_100_MG_LVK_11_SE.metabat2.bin.251.fa	DTU_2024_1036880_100_MG_LVK_11_SE:_contig_10039	114440	115643	-	fes	1-1203/1203	========/======	2025-01-01	100	96.93	vfdb	NP_752602	(fes) enterobactin/ferric enterobactin esterase [enterobactin (IA019)] [Escherichia coli CFT073]
DTU_2024_1036880_100_MG_LVK_11_SE.metabat2.bin.251.fa	DTU_2024_1036880_100_MG_LVK_11_SE:_contig_10039	115886	118127	+	fepA	1-2241/2241	========/======	2025-01-01	100	96.61	vfdb	NP_752600	(fepA) ferrienterobactin outer membrane transporter [Enterobactin (VF0228)] [Escherichia coli CFT073]
DTU_2024_1036880_100_MG_LVK_11_SE.metabat2.bin.251.fa	DTU_2024_1036880_100_MG_LVK_11_SE:_contig_10039	118152	118922	+	entD	1-771/771	===============	0/0	100	94.29	vfdb	NP_752599	(entD) phosphopantetheinyl transferase component of enterobactin synthase multienzyme complex [Enterobactin (VF0228)] [Escherichia coli CFT073]
DTU_2024_1036880_100_MG_LVK_11_SE.metabat2.bin.251.fa	DTU_2024_1036880_100_MG_LVK_11_SE:_contig_10044	101746	103758	+	espX2	1-2013/2013	===============	0/0	100	98.96	vfdb	NP_286562	(espX2) Type III secretion system effector EspX2 [LEE encoded T3SS (SS020)] [Escherichia coli O157:H7 str. EDL933]
DTU_2024_1036880_100_MG_LVK_11_SE.metabat2.bin.251.fa	DTU_2024_1036880_100_MG_LVK_11_SE:_contig_10044	290072	291127	-	ompA	1-1041/1041	========/======	2015-04-01	100	96.12	vfdb	AAF37887	(ompA) outer membrane protein A [OmpA (VF0236)] [Escherichia coli O18:K1:H7 str. RS218]
DTU_2024_1036880_100_MG_LVK_11_SE.metabat2.bin.251.fa	DTU_2024_1036880_100_MG_LVK_11_SE:_contig_13887	9340	10921	+	espX4	1-1581/1581	========/======	2025-03-03	99.94	93.81	vfdb	NP_290672	(espX4) Type III secretion system effector EspX4 [LEE encoded T3SS (SS020)] [Escherichia coli O157:H7 str. EDL933]
DTU_2024_1036880_100_MG_LVK_11_SE.metabat2.bin.251.fa	DTU_2024_1036880_100_MG_LVK_11_SE:_contig_19734	39330	40083	-	yagV/ecpE	1-754/756	===============	0/0	99.74	97.22	vfdb	NP_286006	(yagV/ecpE) E. coli common pilus chaperone EcpE [ECP (VF0404)] [Escherichia coli O157:H7 str. EDL933]
DTU_2024_1036880_100_MG_LVK_11_SE.metabat2.bin.251.fa	DTU_2024_1036880_100_MG_LVK_11_SE:_contig_19734	40007	41651	-	yagW/ecpD	1-1644/1644	========/======	2025-01-01	100	99.33	vfdb	NP_286007	(yagW/ecpD) polymerized tip adhesin of ECP fibers [ECP (VF0404)] [Escherichia coli O157:H7 str. EDL933]
DTU_2024_1036880_100_MG_LVK_11_SE.metabat2.bin.251.fa	DTU_2024_1036880_100_MG_LVK_11_SE:_contig_19734	41641	44166	-	yagX/ecpC	1-2526/2526	===============	0/0	100	99.21	vfdb	NP_286008	(yagX/ecpC) E. coli common pilus usher EcpC [ECP (VF0404)] [Escherichia coli O157:H7 str. EDL933]
DTU_2024_1036880_100_MG_LVK_11_SE.metabat2.bin.251.fa	DTU_2024_1036880_100_MG_LVK_11_SE:_contig_19734	44192	44860	-	yagY/ecpB	1-669/669	===============	0/0	100	99.7	vfdb	NP_286009	(yagY/ecpB) E. coli common pilus chaperone EcpB [ECP (VF0404)] [Escherichia coli O157:H7 str. EDL933]
DTU_2024_1036880_100_MG_LVK_11_SE.metabat2.bin.251.fa	DTU_2024_1036880_100_MG_LVK_11_SE:_contig_19734	44918	45505	-	yagZ/ecpA	1-588/588	===============	0/0	100	99.49	vfdb	NP_286010	(yagZ/ecpA) E. coli common pilus structural subunit EcpA [ECP (VF0404)] [Escherichia coli O157:H7 str. EDL933]
DTU_2024_1036880_100_MG_LVK_11_SE.metabat2.bin.251.fa	DTU_2024_1036880_100_MG_LVK_11_SE:_contig_19734	45580	46170	-	ykgK/ecpR	1-591/591	===============	0/0	100	98.98	vfdb	NP_286011	(ykgK/ecpR) regulator protein EcpR [ECP (VF0404)] [Escherichia coli O157:H7 str. EDL933]
DTU_2024_1036880_100_MG_LVK_11_SE.metabat2.bin.251.fa	DTU_2024_1036880_100_MG_LVK_11_SE:_contig_19734	55499	59758	+	fdeC	1-4246/4251	========/======	2014-11-01	99.88	94.13	vfdb	YP_002390132	(fdeC) adhesin FdeC [FdeC (VF0506)] [Escherichia coli O45:K1:H7 str. S88]
DTU_2024_1036880_100_MG_LVK_11_SE.metabat2.bin.251.fa	DTU_2024_1036880_100_MG_LVK_11_SE:_contig_2355	247675	249574	-	espL1	1-1899/1899	========/======	2025-01-01	100	97.63	vfdb	NP_288154	(espL1) Type III secretion system effector espL1 [LEE encoded T3SS (SS020)] [Escherichia coli O157:H7 str. EDL933]
DTU_2024_1036880_100_MG_LVK_11_SE.metabat2.bin.251.fa	DTU_2024_1036880_100_MG_LVK_11_SE:_contig_29764	12950	14206	+	espR1	1-1253/1260	========/======	2025-04-04	99.44	97.22	vfdb	NP_287686	(espR1) Type III secretion system effector espR1 [LEE encoded T3SS (SS020)] [Escherichia coli O157:H7 str. EDL933]
DTU_2024_1036880_100_MG_LVK_11_SE.metabat2.bin.251.fa	DTU_2024_1036880_100_MG_LVK_11_SE:_contig_41227	26332	27624	-	espX5	1-1293/1293	===============	0/0	100	96.91	vfdb	NP_290699	(espX5) Type III secretion system effector EspX5 [LEE encoded T3SS (SS020)] [Escherichia coli O157:H7 str. EDL933]
DTU_2024_1036880_100_MG_LVK_11_SE.metabat2.bin.251.fa	DTU_2024_1036880_100_MG_LVK_11_SE:_contig_41857	81255	82014	-	espY1	1-753/753	========/======	2025-07-05	100	96.05	vfdb	NP_285753	(espY1) Type III secretion system effector EspY1 [LEE encoded T3SS (SS020)] [Escherichia coli O157:H7 str. EDL933]
DTU_2024_1036880_100_MG_LVK_11_SE.metabat2.bin.251.fa	DTU_2024_1036880_100_MG_LVK_11_SE:_contig_41857	120276	121698	+	espX1	1-1422/1422	========/======	2025-01-01	100	96.56	vfdb	NP_285716	(espX1) Type III secretion system effector EspX1 [LEE encoded T3SS (SS020)] [Escherichia coli O157:H7 str. EDL933]
DTU_2024_1036880_100_MG_LVK_11_SE.metabat2.bin.251.fa	DTU_2024_1036880_100_MG_LVK_11_SE:_contig_9538	36471	37899	-	aslA	1-1428/1428	========/======	2025-01-01	100	93.98	vfdb	AAG10151	(aslA) putative arylsulfatase [AslA (VF0238)] [Escherichia coli O18:K1:H7 str. RS218]
DTU_2024_1036881_100_MG_LVK_17_SE.metabat2.bin.280.fa	DTU_2024_1036881_100_MG_LVK_17_SE:_contig_12134	122780	123370	+	ykgK/ecpR	1-591/591	===============	0/0	100	96.95	vfdb	NP_286011	(ykgK/ecpR) regulator protein EcpR [ECP (VF0404)] [Escherichia coli O157:H7 str. EDL933]
DTU_2024_1036881_100_MG_LVK_17_SE.metabat2.bin.280.fa	DTU_2024_1036881_100_MG_LVK_17_SE:_contig_12134	123445	124032	+	yagZ/ecpA	1-588/588	===============	0/0	100	99.15	vfdb	NP_286010	(yagZ/ecpA) E. coli common pilus structural subunit EcpA [ECP (VF0404)] [Escherichia coli O157:H7 str. EDL933]
DTU_2024_1036881_100_MG_LVK_17_SE.metabat2.bin.280.fa	DTU_2024_1036881_100_MG_LVK_17_SE:_contig_12134	124090	124758	+	yagY/ecpB	1-669/669	===============	0/0	100	98.06	vfdb	NP_286009	(yagY/ecpB) E. coli common pilus chaperone EcpB [ECP (VF0404)] [Escherichia coli O157:H7 str. EDL933]
DTU_2024_1036881_100_MG_LVK_17_SE.metabat2.bin.280.fa	DTU_2024_1036881_100_MG_LVK_17_SE:_contig_12134	124784	127309	+	yagX/ecpC	1-2526/2526	===============	0/0	100	98.85	vfdb	NP_286008	(yagX/ecpC) E. coli common pilus usher EcpC [ECP (VF0404)] [Escherichia coli O157:H7 str. EDL933]
DTU_2024_1036881_100_MG_LVK_17_SE.metabat2.bin.280.fa	DTU_2024_1036881_100_MG_LVK_17_SE:_contig_12134	127299	128942	+	yagW/ecpD	1-1644/1644	===============	0/0	100	99.21	vfdb	NP_286007	(yagW/ecpD) polymerized tip adhesin of ECP fibers [ECP (VF0404)] [Escherichia coli O157:H7 str. EDL933]
DTU_2024_1036881_100_MG_LVK_17_SE.metabat2.bin.280.fa	DTU_2024_1036881_100_MG_LVK_17_SE:_contig_12134	128866	129619	+	yagV/ecpE	1-754/756	===============	0/0	99.74	97.22	vfdb	NP_286006	(yagV/ecpE) E. coli common pilus chaperone EcpE [ECP (VF0404)] [Escherichia coli O157:H7 str. EDL933]
DTU_2024_1036881_100_MG_LVK_17_SE.metabat2.bin.280.fa	DTU_2024_1036881_100_MG_LVK_17_SE:_contig_23534	877	1647	+	entD	1-771/771	===============	0/0	100	95.2	vfdb	NP_752599	(entD) phosphopantetheinyl transferase component of enterobactin synthase multienzyme complex [Enterobactin (VF0228)] [Escherichia coli CFT073]
DTU_2024_1036881_100_MG_LVK_17_SE.metabat2.bin.280.fa	DTU_2024_1036881_100_MG_LVK_17_SE:_contig_30121	46008	47048	-	ompA	1-1041/1041	===============	0/0	100	98.17	vfdb	AAF37887	(ompA) outer membrane protein A [OmpA (VF0236)] [Escherichia coli O18:K1:H7 str. RS218]
DTU_2024_1036881_100_MG_LVK_17_SE.metabat2.bin.280.fa	DTU_2024_1036881_100_MG_LVK_17_SE:_contig_33543	34155	36053	-	espL1	1-1899/1899	===============	0/0	100	97.63	vfdb	NP_288154	(espL1) Type III secretion system effector espL1 [LEE encoded T3SS (SS020)] [Escherichia coli O157:H7 str. EDL933]
DTU_2024_1036881_100_MG_LVK_17_SE.metabat2.bin.280.fa	DTU_2024_1036881_100_MG_LVK_17_SE:_contig_37004	126608	127914	-	ybtS	1-1305/1305	========/======	2025-02-02	100	99.62	vfdb	NP_405477	(ybtS) salicylate synthase Irp9 [Yersiniabactin (VF0136)] [Yersinia pestis CO92]
DTU_2024_1036881_100_MG_LVK_17_SE.metabat2.bin.280.fa	DTU_2024_1036881_100_MG_LVK_17_SE:_contig_37004	127942	129224	-	ybtX	1-1281/1281	========/======	2025-02-01	100	99.38	vfdb	NP_405476	(ybtX) putative signal transducer [Yersiniabactin (VF0136)] [Yersinia pestis CO92]
DTU_2024_1036881_100_MG_LVK_17_SE.metabat2.bin.280.fa	DTU_2024_1036881_100_MG_LVK_17_SE:_contig_37004	129217	131028	-	ybtQ	1-1803/1803	========/======	2025-09-07	100	99.23	vfdb	NP_405475	(ybtQ) inner membrane ABC-transporter YbtQ [Yersiniabactin (VF0136)] [Yersinia pestis CO92]
DTU_2024_1036881_100_MG_LVK_17_SE.metabat2.bin.280.fa	DTU_2024_1036881_100_MG_LVK_17_SE:_contig_37004	131015	132822	-	ybtP	1-1803/1803	========/======	2025-09-04	99.89	98.78	vfdb	NP_405474	(ybtP) lipoprotein inner membrane ABC-transporter [Yersiniabactin (VF0136)] [Yersinia pestis CO92]
DTU_2024_1036881_100_MG_LVK_17_SE.metabat2.bin.280.fa	DTU_2024_1036881_100_MG_LVK_17_SE:_contig_37004	132989	133950	+	ybtA	1-960/960	========/======	2025-02-01	100	98.96	vfdb	NP_405473	(ybtA) transcriptional regulator YbtA [Yersiniabactin (VF0136)] [Yersinia pestis CO92]
DTU_2024_1036881_100_MG_LVK_17_SE.metabat2.bin.280.fa	DTU_2024_1036881_100_MG_LVK_17_SE:_contig_41569	19640	20179	+	fimI	1-540/540	===============	0/0	100	98.89	vfdb	NP_757242	(fimI) Fimbrin-like protein fimI precursor [Type 1 fimbriae (VF0221)] [Escherichia coli CFT073]
DTU_2024_1036881_100_MG_LVK_17_SE.metabat2.bin.280.fa	DTU_2024_1036881_100_MG_LVK_17_SE:_contig_41569	20216	20941	+	fimC	1-726/726	===============	0/0	100	98.76	vfdb	NP_757243	(fimC) Chaperone protein fimC precursor [Type 1 fimbriae (VF0221)] [Escherichia coli CFT073]
DTU_2024_1036881_100_MG_LVK_17_SE.metabat2.bin.280.fa	DTU_2024_1036881_100_MG_LVK_17_SE:_contig_41569	21008	23644	+	fimD	1-2637/2637	===============	0/0	100	98.98	vfdb	NP_757244	(fimD) Outer membrane usher protein fimD precursor [Type 1 fimbriae (VF0221)] [Escherichia coli CFT073]
DTU_2024_1036881_100_MG_LVK_17_SE.metabat2.bin.280.fa	DTU_2024_1036881_100_MG_LVK_17_SE:_contig_41569	23651	24184	+	fimF	1-534/534	===============	0/0	100	97.94	vfdb	NP_757245	(fimF) FimF protein precursor [Type 1 fimbriae (VF0221)] [Escherichia coli CFT073]
DTU_2024_1036881_100_MG_LVK_17_SE.metabat2.bin.280.fa	DTU_2024_1036881_100_MG_LVK_17_SE:_contig_41569	24197	24700	+	fimG	1-504/504	===============	0/0	100	97.82	vfdb	NP_757247	(fimG) FimG protein precursor [Type 1 fimbriae (VF0221)] [Escherichia coli CFT073]
DTU_2024_1036881_100_MG_LVK_17_SE.metabat2.bin.280.fa	DTU_2024_1036881_100_MG_LVK_17_SE:_contig_41569	24711	25622	+	fimH	1-912/912	===============	0/0	100	97.7	vfdb	NP_757248	(fimH) FimH protein precursor [Type 1 fimbriae (VF0221)] [Escherichia coli CFT073]
DTU_2024_1036881_100_MG_LVK_17_SE.metabat2.bin.280.fa	DTU_2024_1036881_100_MG_LVK_17_SE:_contig_42294	9484	11064	-	espX4	1-1581/1581	========/======	2025-02-02	99.94	93.55	vfdb	NP_290672	(espX4) Type III secretion system effector EspX4 [LEE encoded T3SS (SS020)] [Escherichia coli O157:H7 str. EDL933]
DTU_2024_1036881_100_MG_LVK_17_SE.metabat2.bin.280.fa	DTU_2024_1036881_100_MG_LVK_17_SE:_contig_42294	39281	41467	+	espL4	1-2187/2187	===============	0/0	100	97.35	vfdb	NP_290644	(espL4) Type III secretion system effector EspL4 [LEE encoded T3SS (SS020)] [Escherichia coli O157:H7 str. EDL933]
DTU_2024_1036881_100_MG_LVK_17_SE.metabat2.bin.280.fa	DTU_2024_1036881_100_MG_LVK_17_SE:_contig_44005	2054	3258	+	fes	1-1203/1203	========/======	2025-02-02	100	97.01	vfdb	NP_752602	(fes) enterobactin/ferric enterobactin esterase [enterobactin (IA019)] [Escherichia coli CFT073]
DTU_2024_1036881_100_MG_LVK_17_SE.metabat2.bin.280.fa	DTU_2024_1036881_100_MG_LVK_17_SE:_contig_44005	3476	7329	+	entF	1-3854/3882	===============	0/0	99.28	95.75	vfdb	NP_752604	(entF) enterobactin synthase multienzyme complex component ATP-dependent [Enterobactin (VF0228)] [Escherichia coli CFT073]
DTU_2024_1036881_100_MG_LVK_17_SE.metabat2.bin.280.fa	DTU_2024_1036881_100_MG_LVK_17_SE:_contig_44005	8703	9518	-	fepC	1-816/816	===============	0/0	100	97.3	vfdb	NP_752606	(fepC) ferrienterobactin ABC transporter ATPase [Enterobactin (VF0228)] [Escherichia coli CFT073]
DTU_2024_1036881_100_MG_LVK_17_SE.metabat2.bin.280.fa	DTU_2024_1036881_100_MG_LVK_17_SE:_contig_44005	9515	10507	-	fepG	1-993/993	===============	0/0	100	94.06	vfdb	NP_752607	(fepG) iron-enterobactin ABC transporter permease [Enterobactin (VF0228)] [Escherichia coli CFT073]
DTU_2024_1036881_100_MG_LVK_17_SE.metabat2.bin.280.fa	DTU_2024_1036881_100_MG_LVK_17_SE:_contig_44005	10504	11520	-	fepD	1-1017/1017	===============	0/0	100	96.07	vfdb	NP_752608	(fepD) ferrienterobactin ABC transporter permease [Enterobactin (VF0228)] [Escherichia coli CFT073]
DTU_2024_1036881_100_MG_LVK_17_SE.metabat2.bin.280.fa	DTU_2024_1036881_100_MG_LVK_17_SE:_contig_44005	11619	12869	+	entS	1-1251/1251	===============	0/0	100	95.44	vfdb	NP_752609	(entS) enterobactin exporter iron-regulated [enterobactin (IA019)] [Escherichia coli CFT073]
DTU_2024_1036881_100_MG_LVK_17_SE.metabat2.bin.280.fa	DTU_2024_1036881_100_MG_LVK_17_SE:_contig_44005	12873	13829	-	fepB	1-957/957	===============	0/0	100	97.6	vfdb	NP_752610	(fepB) ferrienterobactin ABC transporter periplasmic binding protein [Enterobactin (VF0228)] [Escherichia coli CFT073]
DTU_2024_1036881_100_MG_LVK_17_SE.metabat2.bin.280.fa	DTU_2024_1036881_100_MG_LVK_17_SE:_contig_44005	14192	15379	+	entC	1-1188/1188	===============	0/0	100	97.73	vfdb	NP_752611	(entC) isochorismate synthase 1 [Enterobactin (VF0228)] [Escherichia coli CFT073]
DTU_2024_1036881_100_MG_LVK_17_SE.metabat2.bin.280.fa	DTU_2024_1036881_100_MG_LVK_17_SE:_contig_44005	15389	16999	+	entE	1-1611/1611	===============	0/0	100	95.47	vfdb	NP_752612	(entE) 23-dihydroxybenzoate-AMP ligase component of enterobactin synthase multienzyme complex [Enterobactin (VF0228)] [Escherichia coli CFT073]
DTU_2024_1036881_100_MG_LVK_17_SE.metabat2.bin.280.fa	DTU_2024_1036881_100_MG_LVK_17_SE:_contig_44005	17013	17870	+	entB	1-858/858	===============	0/0	100	98.02	vfdb	NP_752613	(entB) isochorismatase [Enterobactin (VF0228)] [Escherichia coli CFT073]
DTU_2024_1036881_100_MG_LVK_17_SE.metabat2.bin.280.fa	DTU_2024_1036881_100_MG_LVK_17_SE:_contig_44005	17870	18616	+	entA	1-747/747	===============	0/0	100	95.58	vfdb	NP_752614	(entA) 23-dihydro-23-dihydroxybenzoate dehydrogenase [Enterobactin (VF0228)] [Escherichia coli CFT073]
DTU_2024_1036881_100_MG_LVK_17_SE.metabat2.bin.280.fa	DTU_2024_1036881_100_MG_LVK_17_SE:_contig_54501	1578	2302	-	fimC	1-726/726	========/======	2025-01-01	99.86	98.76	vfdb	NP_757243	(fimC) Chaperone protein fimC precursor [Type 1 fimbriae (VF0221)] [Escherichia coli CFT073]
DTU_2024_1036881_100_MG_LVK_17_SE.metabat2.bin.280.fa	DTU_2024_1036881_100_MG_LVK_17_SE:_contig_54501	2339	2878	-	fimI	1-540/540	===============	0/0	100	98.89	vfdb	NP_757242	(fimI) Fimbrin-like protein fimI precursor [Type 1 fimbriae (VF0221)] [Escherichia coli CFT073]
DTU_2024_1036881_100_MG_LVK_17_SE.metabat2.bin.280.fa	DTU_2024_1036881_100_MG_LVK_17_SE:_contig_54501	2943	3554	-	fimA	1-606/606	========/======	2025-06-02	100	90.03	vfdb	NP_757241	(fimA) Type-1 fimbrial protein A chain precursor [Type 1 fimbriae (VF0221)] [Escherichia coli CFT073]
DTU_2024_1036881_100_MG_LVK_17_SE.metabat2.bin.280.fa	DTU_2024_1036881_100_MG_LVK_17_SE:_contig_54501	3978	4574	-	fimE	1-597/597	===============	0/0	100	99.33	vfdb	NP_757240	(fimE) Type 1 fimbriae Regulatory protein fimE [Type 1 fimbriae (VF0221)] [Escherichia coli CFT073]
DTU_2024_1036881_100_MG_LVK_17_SE.metabat2.bin.280.fa	DTU_2024_1036881_100_MG_LVK_17_SE:_contig_54501	5052	5654	-	fimB	1-603/603	===============	0/0	100	98.18	vfdb	NP_757239	(fimB) Type 1 fimbriae Regulatory protein fimB [Type 1 fimbriae (VF0221)] [Escherichia coli CFT073]
DTU_2024_1036881_100_MG_LVK_17_SE.metabat2.bin.280.fa	DTU_2024_1036881_100_MG_LVK_17_SE:_contig_74083	219996	221289	+	espX5	1-1293/1293	========/======	2025-01-01	100	98.07	vfdb	NP_290699	(espX5) Type III secretion system effector EspX5 [LEE encoded T3SS (SS020)] [Escherichia coli O157:H7 str. EDL933]
DTU_2024_1036881_100_MG_LVK_17_SE.metabat2.bin.280.fa	DTU_2024_1036881_100_MG_LVK_17_SE:_contig_8843	1403	2234	-	gspC	1-831/831	========/======	2025-01-01	100	93.27	vfdb	YP_404599	(gspC) general secretion pathway protein C [T2SS (VF0333)] [Shigella dysenteriae Sd197]
DTU_2024_1036882_100_MG_LVK_42_SE.metabat2.bin.437.fa	DTU_2024_1036882_100_MG_LVK_42_SE:_contig_21601	271178	275403	-	fdeC	1-4229/4251	========/======	2025-03-01	99.41	90.99	vfdb	YP_002390132	(fdeC) adhesin FdeC [FdeC (VF0506)] [Escherichia coli O45:K1:H7 str. S88]
DTU_2024_1036882_100_MG_LVK_42_SE.metabat2.bin.437.fa	DTU_2024_1036882_100_MG_LVK_42_SE:_contig_21601	278423	279013	+	ykgK/ecpR	1-591/591	===============	0/0	100	99.49	vfdb	NP_286011	(ykgK/ecpR) regulator protein EcpR [ECP (VF0404)] [Escherichia coli O157:H7 str. EDL933]
DTU_2024_1036882_100_MG_LVK_42_SE.metabat2.bin.437.fa	DTU_2024_1036882_100_MG_LVK_42_SE:_contig_21601	279088	279675	+	yagZ/ecpA	1-588/588	===============	0/0	100	99.32	vfdb	NP_286010	(yagZ/ecpA) E. coli common pilus structural subunit EcpA [ECP (VF0404)] [Escherichia coli O157:H7 str. EDL933]
DTU_2024_1036882_100_MG_LVK_42_SE.metabat2.bin.437.fa	DTU_2024_1036882_100_MG_LVK_42_SE:_contig_21601	279736	280404	+	yagY/ecpB	1-669/669	===============	0/0	100	98.95	vfdb	NP_286009	(yagY/ecpB) E. coli common pilus chaperone EcpB [ECP (VF0404)] [Escherichia coli O157:H7 str. EDL933]
DTU_2024_1036882_100_MG_LVK_42_SE.metabat2.bin.437.fa	DTU_2024_1036882_100_MG_LVK_42_SE:_contig_21601	280430	282955	+	yagX/ecpC	1-2526/2526	===============	0/0	100	98.97	vfdb	NP_286008	(yagX/ecpC) E. coli common pilus usher EcpC [ECP (VF0404)] [Escherichia coli O157:H7 str. EDL933]
DTU_2024_1036882_100_MG_LVK_42_SE.metabat2.bin.437.fa	DTU_2024_1036882_100_MG_LVK_42_SE:_contig_21601	282945	284588	+	yagW/ecpD	1-1644/1644	===============	0/0	100	99.27	vfdb	NP_286007	(yagW/ecpD) polymerized tip adhesin of ECP fibers [ECP (VF0404)] [Escherichia coli O157:H7 str. EDL933]
DTU_2024_1036882_100_MG_LVK_42_SE.metabat2.bin.437.fa	DTU_2024_1036882_100_MG_LVK_42_SE:_contig_21601	284512	285265	+	yagV/ecpE	1-754/756	===============	0/0	99.74	96.95	vfdb	NP_286006	(yagV/ecpE) E. coli common pilus chaperone EcpE [ECP (VF0404)] [Escherichia coli O157:H7 str. EDL933]
DTU_2024_1036882_100_MG_LVK_42_SE.metabat2.bin.437.fa	DTU_2024_1036882_100_MG_LVK_42_SE:_contig_23320	57975	58577	+	fimB	1-603/603	===============	0/0	100	97.84	vfdb	NP_757239	(fimB) Type 1 fimbriae Regulatory protein fimB [Type 1 fimbriae (VF0221)] [Escherichia coli CFT073]
DTU_2024_1036882_100_MG_LVK_42_SE.metabat2.bin.437.fa	DTU_2024_1036882_100_MG_LVK_42_SE:_contig_23320	59055	59651	+	fimE	1-597/597	===============	0/0	100	99.16	vfdb	NP_757240	(fimE) Type 1 fimbriae Regulatory protein fimE [Type 1 fimbriae (VF0221)] [Escherichia coli CFT073]
DTU_2024_1036882_100_MG_LVK_42_SE.metabat2.bin.437.fa	DTU_2024_1036882_100_MG_LVK_42_SE:_contig_23320	60735	61274	+	fimI	1-540/540	===============	0/0	100	98.33	vfdb	NP_757242	(fimI) Fimbrin-like protein fimI precursor [Type 1 fimbriae (VF0221)] [Escherichia coli CFT073]
DTU_2024_1036882_100_MG_LVK_42_SE.metabat2.bin.437.fa	DTU_2024_1036882_100_MG_LVK_42_SE:_contig_23320	61311	62036	+	fimC	1-726/726	===============	0/0	100	98.35	vfdb	NP_757243	(fimC) Chaperone protein fimC precursor [Type 1 fimbriae (VF0221)] [Escherichia coli CFT073]
DTU_2024_1036882_100_MG_LVK_42_SE.metabat2.bin.437.fa	DTU_2024_1036882_100_MG_LVK_42_SE:_contig_23320	62103	64739	+	fimD	1-2637/2637	===============	0/0	100	98.71	vfdb	NP_757244	(fimD) Outer membrane usher protein fimD precursor [Type 1 fimbriae (VF0221)] [Escherichia coli CFT073]
DTU_2024_1036882_100_MG_LVK_42_SE.metabat2.bin.437.fa	DTU_2024_1036882_100_MG_LVK_42_SE:_contig_23320	64746	65279	+	fimF	1-534/534	===============	0/0	100	97.38	vfdb	NP_757245	(fimF) FimF protein precursor [Type 1 fimbriae (VF0221)] [Escherichia coli CFT073]
DTU_2024_1036882_100_MG_LVK_42_SE.metabat2.bin.437.fa	DTU_2024_1036882_100_MG_LVK_42_SE:_contig_23320	65292	65795	+	fimG	1-504/504	===============	0/0	100	97.82	vfdb	NP_757247	(fimG) FimG protein precursor [Type 1 fimbriae (VF0221)] [Escherichia coli CFT073]
DTU_2024_1036882_100_MG_LVK_42_SE.metabat2.bin.437.fa	DTU_2024_1036882_100_MG_LVK_42_SE:_contig_23320	65806	66717	+	fimH	1-912/912	===============	0/0	100	97.26	vfdb	NP_757248	(fimH) FimH protein precursor [Type 1 fimbriae (VF0221)] [Escherichia coli CFT073]
DTU_2024_1036882_100_MG_LVK_42_SE.metabat2.bin.437.fa	DTU_2024_1036882_100_MG_LVK_42_SE:_contig_23324	163652	165073	-	espX1	1-1422/1422	===============	0/0	100	94.44	vfdb	NP_285716	(espX1) Type III secretion system effector EspX1 [LEE encoded T3SS (SS020)] [Escherichia coli O157:H7 str. EDL933]
DTU_2024_1036882_100_MG_LVK_42_SE.metabat2.bin.437.fa	DTU_2024_1036882_100_MG_LVK_42_SE:_contig_30489	8486	8749	-	escG	1-264/279	===============	0/0	94.62	90.15	vfdb	NP_290251	(escG) chaperone for EscF [LEE encoded T3SS (SS020)] [Escherichia coli O157:H7 str. EDL933]
DTU_2024_1036882_100_MG_LVK_42_SE.metabat2.bin.437.fa	DTU_2024_1036882_100_MG_LVK_42_SE:_contig_30489	8755	8976	-	escF	1-222/222	===============	0/0	100	96.85	vfdb	NP_290252	(escF) Type III secretion system needle filament protein EscF [TTSS (VF0191)] [Escherichia coli O157:H7 str. EDL933]
DTU_2024_1036882_100_MG_LVK_42_SE.metabat2.bin.437.fa	DTU_2024_1036882_100_MG_LVK_42_SE:_contig_30489	9014	9420	-	cesD2	1-407/408	===============	0/0	99.75	96.56	vfdb	NP_290253	(cesD2) chaperone for EspD [LEE encoded T3SS (SS020)] [Escherichia coli O157:H7 str. EDL933]
DTU_2024_1036882_100_MG_LVK_42_SE.metabat2.bin.437.fa	DTU_2024_1036882_100_MG_LVK_42_SE:_contig_30489	12183	13238	-	sepL	1-1056/1056	===============	0/0	100	92.05	vfdb	NP_290257	(sepL) Type III secretion system secretion gatekeeper SepL [TTSS (VF0191)] [Escherichia coli O157:H7 str. EDL933]
DTU_2024_1036882_100_MG_LVK_42_SE.metabat2.bin.437.fa	DTU_2024_1036882_100_MG_LVK_42_SE:_contig_30489	13381	14601	+	escD	1-1221/1221	===============	0/0	100	95.17	vfdb	NP_290258	(escD) Type III secretion system outer MS ring protein EscD [TTSS (VF0191)] [Escherichia coli O157:H7 str. EDL933]
DTU_2024_1036882_100_MG_LVK_42_SE.metabat2.bin.437.fa	DTU_2024_1036882_100_MG_LVK_42_SE:_contig_30489	17696	18166	-	cesT	1-471/471	===============	0/0	100	95.12	vfdb	NP_290260	(cesT) multieffector chaperone [LEE encoded T3SS (SS020)] [Escherichia coli O157:H7 str. EDL933]
DTU_2024_1036882_100_MG_LVK_42_SE.metabat2.bin.437.fa	DTU_2024_1036882_100_MG_LVK_42_SE:_contig_30489	23636	24013	-	escO	1-378/378	===============	0/0	100	96.03	vfdb	NP_290267	(escO) positive regulator EscO [LEE encoded T3SS (SS020)] [Escherichia coli O157:H7 str. EDL933]
DTU_2024_1036882_100_MG_LVK_42_SE.metabat2.bin.437.fa	DTU_2024_1036882_100_MG_LVK_42_SE:_contig_30489	24016	25356	-	escN	1-1341/1341	===============	0/0	100	93.36	vfdb	NP_290268	(escN) ATPase EscN [TTSS (VF0191)] [Escherichia coli O157:H7 str. EDL933]
DTU_2024_1036882_100_MG_LVK_42_SE.metabat2.bin.437.fa	DTU_2024_1036882_100_MG_LVK_42_SE:_contig_30489	25340	27367	-	escV	1-2028/2028	===============	0/0	100	95.17	vfdb	NP_290269	(escV) Type III secretion system major export apparatus protein [TTSS (VF0191)] [Escherichia coli O157:H7 str. EDL933]
DTU_2024_1036882_100_MG_LVK_42_SE.metabat2.bin.437.fa	DTU_2024_1036882_100_MG_LVK_42_SE:_contig_30489	27364	27717	-	cesL	1-354/354	===============	0/0	100	92.09	vfdb	NP_290270	(cesL) chaperone for SepL [LEE encoded T3SS (SS020)] [Escherichia coli O157:H7 str. EDL933]
DTU_2024_1036882_100_MG_LVK_42_SE.metabat2.bin.437.fa	DTU_2024_1036882_100_MG_LVK_42_SE:_contig_30489	28236	28664	+	escI	1-429/429	===============	0/0	100	90.21	vfdb	NP_290272	(escI) Type III secretion system inner rod component EscI [LEE encoded T3SS (SS020)] [Escherichia coli O157:H7 str. EDL933]
DTU_2024_1036882_100_MG_LVK_42_SE.metabat2.bin.437.fa	DTU_2024_1036882_100_MG_LVK_42_SE:_contig_30489	28666	29238	+	escJ	1-573/573	===============	0/0	100	91.27	vfdb	NP_290273	(escJ) Type III secretion system inner MS ring protein EscJ [TTSS (VF0191)] [Escherichia coli O157:H7 str. EDL933]
DTU_2024_1036882_100_MG_LVK_42_SE.metabat2.bin.437.fa	DTU_2024_1036882_100_MG_LVK_42_SE:_contig_30489	29699	31237	+	escC	1-1539/1539	===============	0/0	100	91.62	vfdb	NP_290275	(escC) Type III secretion system secretin EscC [TTSS (VF0191)] [Escherichia coli O157:H7 str. EDL933]
DTU_2024_1036882_100_MG_LVK_42_SE.metabat2.bin.437.fa	DTU_2024_1036882_100_MG_LVK_42_SE:_contig_30489	31251	31706	+	cesD	1-456/456	===============	0/0	100	93.86	vfdb	NP_290276	(cesD) chaperone for EspB and EspD [TTSS (VF0191)] [Escherichia coli O157:H7 str. EDL933]
DTU_2024_1036882_100_MG_LVK_42_SE.metabat2.bin.437.fa	DTU_2024_1036882_100_MG_LVK_42_SE:_contig_30489	33133	33591	+	etgA	1-459/459	===============	0/0	100	94.34	vfdb	NP_290279	(etgA) T3SS-associated peptidoglycan lytic enzyme [LEE encoded T3SS (SS020)] [Escherichia coli O157:H7 str. EDL933]
DTU_2024_1036882_100_MG_LVK_42_SE.metabat2.bin.437.fa	DTU_2024_1036882_100_MG_LVK_42_SE:_contig_30489	33588	34625	-	escU	1-1038/1038	===============	0/0	100	95.95	vfdb	NP_290280	(escU) Type III secretion system export apparatus switch protein EscU [TTSS (VF0191)] [Escherichia coli O157:H7 str. EDL933]
DTU_2024_1036882_100_MG_LVK_42_SE.metabat2.bin.437.fa	DTU_2024_1036882_100_MG_LVK_42_SE:_contig_30489	34618	35394	-	escT	1-777/777	===============	0/0	100	94.85	vfdb	NP_290281	(escT) Type III secretion system minor export apparatus protein EscT [TTSS (VF0191)] [Escherichia coli O157:H7 str. EDL933]
DTU_2024_1036882_100_MG_LVK_42_SE.metabat2.bin.437.fa	DTU_2024_1036882_100_MG_LVK_42_SE:_contig_30489	35394	35663	-	escS	1-270/270	===============	0/0	100	96.67	vfdb	NP_290282	(escS) Type III secretion systemminor export apparatus protein EscS [TTSS (VF0191)] [Escherichia coli O157:H7 str. EDL933]
DTU_2024_1036882_100_MG_LVK_42_SE.metabat2.bin.437.fa	DTU_2024_1036882_100_MG_LVK_42_SE:_contig_30489	35663	36316	-	escR	1-654/654	===============	0/0	100	97.4	vfdb	NP_290283	(escR) Type III secretion systemminor export apparatus protein EscR [TTSS (VF0191)] [Escherichia coli O157:H7 str. EDL933]
DTU_2024_1036882_100_MG_LVK_42_SE.metabat2.bin.437.fa	DTU_2024_1036882_100_MG_LVK_42_SE:_contig_30489	36321	36935	-	escL	1-615/615	===============	0/0	100	92.85	vfdb	NP_290284	(escL) negative regulator EscL stator protein [LEE encoded T3SS (SS020)] [Escherichia coli O157:H7 str. EDL933]
DTU_2024_1036882_100_MG_LVK_42_SE.metabat2.bin.437.fa	DTU_2024_1036882_100_MG_LVK_42_SE:_contig_30489	37557	37878	-	cesAB	3-324/324	===============	0/0	99.38	94.72	vfdb	NP_290286	(cesAB) chaperone for EspA and EspB [LEE encoded T3SS (SS020)] [Escherichia coli O157:H7 str. EDL933]
DTU_2024_1036882_100_MG_LVK_42_SE.metabat2.bin.437.fa	DTU_2024_1036882_100_MG_LVK_42_SE:_contig_30489	37884	38102	-	escE	1-219/219	===============	0/0	100	94.52	vfdb	NP_290287	(escE) chaperone for EscF [LEE encoded T3SS (SS020)] [Escherichia coli O157:H7 str. EDL933]
DTU_2024_1036882_100_MG_LVK_42_SE.metabat2.bin.437.fa	DTU_2024_1036882_100_MG_LVK_42_SE:_contig_30489	39654	40849	+	espG	2-1197/1197	===============	0/0	99.92	90.13	vfdb	NP_290289	(espG) Type III secretion system effector EspG GTPase activating protein [EspG (VF0201)] [Escherichia coli O157:H7 str. EDL933]
DTU_2024_1036882_100_MG_LVK_42_SE.metabat2.bin.437.fa	DTU_2024_1036882_100_MG_LVK_42_SE:_contig_30489	125364	126655	+	espX5	1-1293/1293	========/======	2025-01-01	99.92	95.9	vfdb	NP_290699	(espX5) Type III secretion system effector EspX5 [LEE encoded T3SS (SS020)] [Escherichia coli O157:H7 str. EDL933]
DTU_2024_1036882_100_MG_LVK_42_SE.metabat2.bin.437.fa	DTU_2024_1036882_100_MG_LVK_42_SE:_contig_30489	156173	157753	-	espX4	1-1581/1581	===============	0/0	100	93.48	vfdb	NP_290672	(espX4) Type III secretion system effector EspX4 [LEE encoded T3SS (SS020)] [Escherichia coli O157:H7 str. EDL933]
DTU_2024_1036882_100_MG_LVK_42_SE.metabat2.bin.437.fa	DTU_2024_1036882_100_MG_LVK_42_SE:_contig_30489	1317257	1318087	+	gspC	1-831/831	===============	0/0	100	95.19	vfdb	YP_404599	(gspC) general secretion pathway protein C [T2SS (VF0333)] [Shigella dysenteriae Sd197]
DTU_2024_1036882_100_MG_LVK_42_SE.metabat2.bin.437.fa	DTU_2024_1036882_100_MG_LVK_42_SE:_contig_30489	1318327	1320177	+	gspD	1-1836/1836	========/======	2015-01-01	100	97.14	vfdb	YP_404600	(gspD) general secretion pathway protein D [T2SS (VF0333)] [Shigella dysenteriae Sd197]
DTU_2024_1036882_100_MG_LVK_42_SE.metabat2.bin.437.fa	DTU_2024_1036882_100_MG_LVK_42_SE:_contig_30489	1320177	1321664	+	gspE	1-1494/1494	========/======	2025-06-01	99.6	95.78	vfdb	YP_404601	(gspE) general secretion pathway protein E [T2SS (VF0333)] [Shigella dysenteriae Sd197]
DTU_2024_1036882_100_MG_LVK_42_SE.metabat2.bin.437.fa	DTU_2024_1036882_100_MG_LVK_42_SE:_contig_30489	1321664	1322863	+	gspF	1-1200/1200	===============	0/0	100	96.33	vfdb	YP_404602	(gspF) general secretion pathway protein F [T2SS (VF0333)] [Shigella dysenteriae Sd197]
DTU_2024_1036882_100_MG_LVK_42_SE.metabat2.bin.437.fa	DTU_2024_1036882_100_MG_LVK_42_SE:_contig_30489	1322904	1323359	+	gspG	1-456/456	===============	0/0	100	95.61	vfdb	YP_404603	(gspG) general secretion pathway protein G [T2SS (VF0333)] [Shigella dysenteriae Sd197]
DTU_2024_1036882_100_MG_LVK_42_SE.metabat2.bin.437.fa	DTU_2024_1036882_100_MG_LVK_42_SE:_contig_30489	1323396	1323926	+	gspH	1-531/531	===============	0/0	100	95.86	vfdb	YP_404604	(gspH) general secretion pathway protein H [T2SS (VF0333)] [Shigella dysenteriae Sd197]
DTU_2024_1036882_100_MG_LVK_42_SE.metabat2.bin.437.fa	DTU_2024_1036882_100_MG_LVK_42_SE:_contig_30489	1323923	1324294	+	gspI	1-372/372	===============	0/0	100	94.89	vfdb	YP_404605	(gspI) general secretion pathway protein I [T2SS (VF0333)] [Shigella dysenteriae Sd197]
DTU_2024_1036882_100_MG_LVK_42_SE.metabat2.bin.437.fa	DTU_2024_1036882_100_MG_LVK_42_SE:_contig_30489	1324327	1324896	+	gspJ	1-570/570	===============	0/0	100	97.19	vfdb	YP_404606	(gspJ) general secretion pathway protein J [T2SS (VF0333)] [Shigella dysenteriae Sd197]
DTU_2024_1036882_100_MG_LVK_42_SE.metabat2.bin.437.fa	DTU_2024_1036882_100_MG_LVK_42_SE:_contig_30489	1324893	1325870	+	gspK	1-978/978	===============	0/0	100	97.85	vfdb	YP_404607	(gspK) general secretion pathway protein K [T2SS (VF0333)] [Shigella dysenteriae Sd197]
DTU_2024_1036882_100_MG_LVK_42_SE.metabat2.bin.437.fa	DTU_2024_1036882_100_MG_LVK_42_SE:_contig_30489	1326185	1327045	+	gspL	1-861/861	===============	0/0	100	97.56	vfdb	YP_404608	(gspL) general secretion pathway protein L [T2SS (VF0333)] [Shigella dysenteriae Sd197]
DTU_2024_1036882_100_MG_LVK_42_SE.metabat2.bin.437.fa	DTU_2024_1036882_100_MG_LVK_42_SE:_contig_30489	1327161	1327583	+	gspM	1-423/423	===============	0/0	100	94.09	vfdb	YP_404609	(gspM) general secretion pathway protein M [T2SS (VF0333)] [Shigella dysenteriae Sd197]
DTU_2024_1036883_100_MG_LVK_43_SE.metabat2.bin.292.fa	DTU_2024_1036883_100_MG_LVK_43_SE:_contig_13527	167335	169233	+	espL1	1-1899/1899	===============	0/0	100	96.79	vfdb	NP_288154	(espL1) Type III secretion system effector espL1 [LEE encoded T3SS (SS020)] [Escherichia coli O157:H7 str. EDL933]
DTU_2024_1036883_100_MG_LVK_43_SE.metabat2.bin.292.fa	DTU_2024_1036883_100_MG_LVK_43_SE:_contig_13554	93173	93919	-	entA	1-747/747	===============	0/0	100	94.91	vfdb	NP_752614	(entA) 23-dihydro-23-dihydroxybenzoate dehydrogenase [Enterobactin (VF0228)] [Escherichia coli CFT073]
DTU_2024_1036883_100_MG_LVK_43_SE.metabat2.bin.292.fa	DTU_2024_1036883_100_MG_LVK_43_SE:_contig_13554	93919	94776	-	entB	1-858/858	===============	0/0	100	97.67	vfdb	NP_752613	(entB) isochorismatase [Enterobactin (VF0228)] [Escherichia coli CFT073]
DTU_2024_1036883_100_MG_LVK_43_SE.metabat2.bin.292.fa	DTU_2024_1036883_100_MG_LVK_43_SE:_contig_13554	94790	96401	-	entE	1-1611/1611	========/======	2025-01-01	100	96.09	vfdb	NP_752612	(entE) 23-dihydroxybenzoate-AMP ligase component of enterobactin synthase multienzyme complex [Enterobactin (VF0228)] [Escherichia coli CFT073]
DTU_2024_1036883_100_MG_LVK_43_SE.metabat2.bin.292.fa	DTU_2024_1036883_100_MG_LVK_43_SE:_contig_13554	96411	97598	-	entC	1-1188/1188	===============	0/0	100	98.06	vfdb	NP_752611	(entC) isochorismate synthase 1 [Enterobactin (VF0228)] [Escherichia coli CFT073]
DTU_2024_1036883_100_MG_LVK_43_SE.metabat2.bin.292.fa	DTU_2024_1036883_100_MG_LVK_43_SE:_contig_13554	97775	98731	+	fepB	1-957/957	===============	0/0	100	98.22	vfdb	NP_752610	(fepB) ferrienterobactin ABC transporter periplasmic binding protein [Enterobactin (VF0228)] [Escherichia coli CFT073]
DTU_2024_1036883_100_MG_LVK_43_SE.metabat2.bin.292.fa	DTU_2024_1036883_100_MG_LVK_43_SE:_contig_13554	98735	99985	-	entS	1-1251/1251	===============	0/0	100	96.16	vfdb	NP_752609	(entS) enterobactin exporter iron-regulated [enterobactin (IA019)] [Escherichia coli CFT073]
DTU_2024_1036883_100_MG_LVK_43_SE.metabat2.bin.292.fa	DTU_2024_1036883_100_MG_LVK_43_SE:_contig_13554	100084	101100	+	fepD	1-1017/1017	===============	0/0	100	95.97	vfdb	NP_752608	(fepD) ferrienterobactin ABC transporter permease [Enterobactin (VF0228)] [Escherichia coli CFT073]
DTU_2024_1036883_100_MG_LVK_43_SE.metabat2.bin.292.fa	DTU_2024_1036883_100_MG_LVK_43_SE:_contig_13554	101097	102089	+	fepG	1-993/993	===============	0/0	100	95.06	vfdb	NP_752607	(fepG) iron-enterobactin ABC transporter permease [Enterobactin (VF0228)] [Escherichia coli CFT073]
DTU_2024_1036883_100_MG_LVK_43_SE.metabat2.bin.292.fa	DTU_2024_1036883_100_MG_LVK_43_SE:_contig_13554	102086	102901	+	fepC	1-816/816	===============	0/0	100	96.08	vfdb	NP_752606	(fepC) ferrienterobactin ABC transporter ATPase [Enterobactin (VF0228)] [Escherichia coli CFT073]
DTU_2024_1036883_100_MG_LVK_43_SE.metabat2.bin.292.fa	DTU_2024_1036883_100_MG_LVK_43_SE:_contig_13554	104278	108133	-	entF	1-3854/3882	========/======	2025-04-04	99.25	96.11	vfdb	NP_752604	(entF) enterobactin synthase multienzyme complex component ATP-dependent [Enterobactin (VF0228)] [Escherichia coli CFT073]
DTU_2024_1036883_100_MG_LVK_43_SE.metabat2.bin.292.fa	DTU_2024_1036883_100_MG_LVK_43_SE:_contig_13554	108351	109553	-	fes	1-1203/1203	===============	0/0	100	96.84	vfdb	NP_752602	(fes) enterobactin/ferric enterobactin esterase [enterobactin (IA019)] [Escherichia coli CFT073]
DTU_2024_1036883_100_MG_LVK_43_SE.metabat2.bin.292.fa	DTU_2024_1036883_100_MG_LVK_43_SE:_contig_13554	109796	112037	+	fepA	1-2241/2241	========/======	2025-01-01	100	97.14	vfdb	NP_752600	(fepA) ferrienterobactin outer membrane transporter [Enterobactin (VF0228)] [Escherichia coli CFT073]
DTU_2024_1036883_100_MG_LVK_43_SE.metabat2.bin.292.fa	DTU_2024_1036883_100_MG_LVK_43_SE:_contig_13554	112062	112832	+	entD	1-771/771	===============	0/0	100	94.29	vfdb	NP_752599	(entD) phosphopantetheinyl transferase component of enterobactin synthase multienzyme complex [Enterobactin (VF0228)] [Escherichia coli CFT073]
DTU_2024_1036883_100_MG_LVK_43_SE.metabat2.bin.292.fa	DTU_2024_1036883_100_MG_LVK_43_SE:_contig_13554	291505	293076	+	espY3	1-1572/1572	===============	0/0	100	99.75	vfdb	NP_286160	(espY3) Type III secretion system effector EspY3 [LEE encoded T3SS (SS020)] [Escherichia coli O157:H7 str. EDL933]
DTU_2024_1036883_100_MG_LVK_43_SE.metabat2.bin.292.fa	DTU_2024_1036883_100_MG_LVK_43_SE:_contig_13573	11703	12614	-	fimH	1-912/912	===============	0/0	100	97.59	vfdb	NP_757248	(fimH) FimH protein precursor [Type 1 fimbriae (VF0221)] [Escherichia coli CFT073]
DTU_2024_1036883_100_MG_LVK_43_SE.metabat2.bin.292.fa	DTU_2024_1036883_100_MG_LVK_43_SE:_contig_13573	12625	13128	-	fimG	1-504/504	===============	0/0	100	98.21	vfdb	NP_757247	(fimG) FimG protein precursor [Type 1 fimbriae (VF0221)] [Escherichia coli CFT073]
DTU_2024_1036883_100_MG_LVK_43_SE.metabat2.bin.292.fa	DTU_2024_1036883_100_MG_LVK_43_SE:_contig_13573	13141	13674	-	fimF	1-534/534	===============	0/0	100	97.19	vfdb	NP_757245	(fimF) FimF protein precursor [Type 1 fimbriae (VF0221)] [Escherichia coli CFT073]
DTU_2024_1036883_100_MG_LVK_43_SE.metabat2.bin.292.fa	DTU_2024_1036883_100_MG_LVK_43_SE:_contig_13573	13681	16317	-	fimD	1-2637/2637	===============	0/0	100	98.75	vfdb	NP_757244	(fimD) Outer membrane usher protein fimD precursor [Type 1 fimbriae (VF0221)] [Escherichia coli CFT073]
DTU_2024_1036883_100_MG_LVK_43_SE.metabat2.bin.292.fa	DTU_2024_1036883_100_MG_LVK_43_SE:_contig_13573	16383	17108	-	fimC	1-726/726	===============	0/0	100	98.35	vfdb	NP_757243	(fimC) Chaperone protein fimC precursor [Type 1 fimbriae (VF0221)] [Escherichia coli CFT073]
DTU_2024_1036883_100_MG_LVK_43_SE.metabat2.bin.292.fa	DTU_2024_1036883_100_MG_LVK_43_SE:_contig_13573	17145	17684	-	fimI	1-540/540	===============	0/0	100	99.07	vfdb	NP_757242	(fimI) Fimbrin-like protein fimI precursor [Type 1 fimbriae (VF0221)] [Escherichia coli CFT073]
DTU_2024_1036883_100_MG_LVK_43_SE.metabat2.bin.292.fa	DTU_2024_1036883_100_MG_LVK_43_SE:_contig_13573	17749	18354	-	fimA	1-606/606	===============	0/0	100	90.92	vfdb	NP_757241	(fimA) Type-1 fimbrial protein A chain precursor [Type 1 fimbriae (VF0221)] [Escherichia coli CFT073]
DTU_2024_1036883_100_MG_LVK_43_SE.metabat2.bin.292.fa	DTU_2024_1036883_100_MG_LVK_43_SE:_contig_13573	18779	19375	-	fimE	1-597/597	===============	0/0	100	98.49	vfdb	NP_757240	(fimE) Type 1 fimbriae Regulatory protein fimE [Type 1 fimbriae (VF0221)] [Escherichia coli CFT073]
DTU_2024_1036883_100_MG_LVK_43_SE.metabat2.bin.292.fa	DTU_2024_1036883_100_MG_LVK_43_SE:_contig_13573	19853	20455	-	fimB	1-603/603	===============	0/0	100	97.68	vfdb	NP_757239	(fimB) Type 1 fimbriae Regulatory protein fimB [Type 1 fimbriae (VF0221)] [Escherichia coli CFT073]
DTU_2024_1036883_100_MG_LVK_43_SE.metabat2.bin.292.fa	DTU_2024_1036883_100_MG_LVK_43_SE:_contig_13573	223913	224029	-	astA	1-117/117	===============	0/0	100	98.29	vfdb	BAA94855	(astA) heat-stable enterotoxin 1 [EAST1 (VF0216)] [Escherichia coli O44:H18 042]
DTU_2024_1036883_100_MG_LVK_43_SE.metabat2.bin.292.fa	DTU_2024_1036883_100_MG_LVK_43_SE:_contig_1805	190410	191840	+	aslA	1-1428/1428	========/======	2025-03-03	100	93.85	vfdb	AAG10151	(aslA) putative arylsulfatase [AslA (VF0238)] [Escherichia coli O18:K1:H7 str. RS218]
DTU_2024_1036883_100_MG_LVK_43_SE.metabat2.bin.292.fa	DTU_2024_1036883_100_MG_LVK_43_SE:_contig_1805	537812	538612	-	chuV	1-801/801	===============	0/0	100	98.13	vfdb	NP_756180	(chuV) ATP-binding hydrophilic protein ChuV [Chu (VF0227)] [Escherichia coli CFT073]
DTU_2024_1036883_100_MG_LVK_43_SE.metabat2.bin.292.fa	DTU_2024_1036883_100_MG_LVK_43_SE:_contig_1805	538579	539571	-	chuU	1-993/993	===============	0/0	100	98.39	vfdb	NP_756179	(chuU) heme permease protein ChuU [Chu (VF0227)] [Escherichia coli CFT073]
DTU_2024_1036883_100_MG_LVK_43_SE.metabat2.bin.292.fa	DTU_2024_1036883_100_MG_LVK_43_SE:_contig_1805	539622	540245	-	shuY	1-624/624	===============	0/0	100	99.04	vfdb	YP_405015	(shuY) shu locus protein ShuY [Shu (VF0256)] [Shigella dysenteriae Sd197]
DTU_2024_1036883_100_MG_LVK_43_SE.metabat2.bin.292.fa	DTU_2024_1036883_100_MG_LVK_43_SE:_contig_1805	540245	540739	-	shuX	1-495/495	===============	0/0	100	98.79	vfdb	YP_405016	(shuX) shu locus protein ShuX [Shu (VF0256)] [Shigella dysenteriae Sd197]
DTU_2024_1036883_100_MG_LVK_43_SE.metabat2.bin.292.fa	DTU_2024_1036883_100_MG_LVK_43_SE:_contig_1805	540752	542089	-	chuW	1-1338/1338	===============	0/0	100	96.11	vfdb	NP_756176	(chuW) Putative oxygen independent coproporphyrinogen III oxidase [Chu (VF0227)] [Escherichia coli CFT073]
DTU_2024_1036883_100_MG_LVK_43_SE.metabat2.bin.292.fa	DTU_2024_1036883_100_MG_LVK_43_SE:_contig_1805	542109	543101	-	shuT	1-993/993	===============	0/0	100	98.39	vfdb	YP_405017	(shuT) periplasmic binding protein ShuT [Shu (VF0256)] [Shigella dysenteriae Sd197]
DTU_2024_1036883_100_MG_LVK_43_SE.metabat2.bin.292.fa	DTU_2024_1036883_100_MG_LVK_43_SE:_contig_1805	543706	545688	+	shuA	1-1983/1983	===============	0/0	100	99.44	vfdb	YP_405019	(shuA) outer membrane heme/hemoglobin receptor ShuA [Shu (VF0256)] [Shigella dysenteriae Sd197]
DTU_2024_1036883_100_MG_LVK_43_SE.metabat2.bin.292.fa	DTU_2024_1036883_100_MG_LVK_43_SE:_contig_1805	545737	546765	+	shuS	1-1029/1029	===============	0/0	100	98.64	vfdb	YP_405020	(shuS) heme/hemoglobin transport protein ShuS [Shu (VF0256)] [Shigella dysenteriae Sd197]
DTU_2024_1036883_100_MG_LVK_43_SE.metabat2.bin.292.fa	DTU_2024_1036883_100_MG_LVK_43_SE:_contig_1808	366708	367130	-	gspM	1-423/423	===============	0/0	100	98.34	vfdb	YP_404609	(gspM) general secretion pathway protein M [T2SS (VF0333)] [Shigella dysenteriae Sd197]
DTU_2024_1036883_100_MG_LVK_43_SE.metabat2.bin.292.fa	DTU_2024_1036883_100_MG_LVK_43_SE:_contig_1808	367246	368106	-	gspL	1-861/861	===============	0/0	100	98.49	vfdb	YP_404608	(gspL) general secretion pathway protein L [T2SS (VF0333)] [Shigella dysenteriae Sd197]
DTU_2024_1036883_100_MG_LVK_43_SE.metabat2.bin.292.fa	DTU_2024_1036883_100_MG_LVK_43_SE:_contig_1808	368421	369398	-	gspK	1-978/978	===============	0/0	100	98.36	vfdb	YP_404607	(gspK) general secretion pathway protein K [T2SS (VF0333)] [Shigella dysenteriae Sd197]
DTU_2024_1036883_100_MG_LVK_43_SE.metabat2.bin.292.fa	DTU_2024_1036883_100_MG_LVK_43_SE:_contig_1808	369395	369964	-	gspJ	1-570/570	===============	0/0	100	97.54	vfdb	YP_404606	(gspJ) general secretion pathway protein J [T2SS (VF0333)] [Shigella dysenteriae Sd197]
DTU_2024_1036883_100_MG_LVK_43_SE.metabat2.bin.292.fa	DTU_2024_1036883_100_MG_LVK_43_SE:_contig_1808	369997	370368	-	gspI	1-372/372	===============	0/0	100	97.31	vfdb	YP_404605	(gspI) general secretion pathway protein I [T2SS (VF0333)] [Shigella dysenteriae Sd197]
DTU_2024_1036883_100_MG_LVK_43_SE.metabat2.bin.292.fa	DTU_2024_1036883_100_MG_LVK_43_SE:_contig_1808	370365	370895	-	gspH	1-531/531	===============	0/0	100	97.93	vfdb	YP_404604	(gspH) general secretion pathway protein H [T2SS (VF0333)] [Shigella dysenteriae Sd197]
DTU_2024_1036883_100_MG_LVK_43_SE.metabat2.bin.292.fa	DTU_2024_1036883_100_MG_LVK_43_SE:_contig_1808	370932	371387	-	gspG	1-456/456	===============	0/0	100	95.83	vfdb	YP_404603	(gspG) general secretion pathway protein G [T2SS (VF0333)] [Shigella dysenteriae Sd197]
DTU_2024_1036883_100_MG_LVK_43_SE.metabat2.bin.292.fa	DTU_2024_1036883_100_MG_LVK_43_SE:_contig_1808	371428	372627	-	gspF	1-1200/1200	===============	0/0	100	98.17	vfdb	YP_404602	(gspF) general secretion pathway protein F [T2SS (VF0333)] [Shigella dysenteriae Sd197]
DTU_2024_1036883_100_MG_LVK_43_SE.metabat2.bin.292.fa	DTU_2024_1036883_100_MG_LVK_43_SE:_contig_1808	372627	374120	-	gspE	1-1494/1494	===============	0/0	100	97.32	vfdb	YP_404601	(gspE) general secretion pathway protein E [T2SS (VF0333)] [Shigella dysenteriae Sd197]
DTU_2024_1036883_100_MG_LVK_43_SE.metabat2.bin.292.fa	DTU_2024_1036883_100_MG_LVK_43_SE:_contig_1808	374120	375970	-	gspD	1-1836/1836	========/======	2015-01-01	100	98.06	vfdb	YP_404600	(gspD) general secretion pathway protein D [T2SS (VF0333)] [Shigella dysenteriae Sd197]
DTU_2024_1036883_100_MG_LVK_43_SE.metabat2.bin.292.fa	DTU_2024_1036883_100_MG_LVK_43_SE:_contig_1808	376210	377040	-	gspC	1-831/831	===============	0/0	100	96.39	vfdb	YP_404599	(gspC) general secretion pathway protein C [T2SS (VF0333)] [Shigella dysenteriae Sd197]
DTU_2024_1036883_100_MG_LVK_43_SE.metabat2.bin.292.fa	DTU_2024_1036883_100_MG_LVK_43_SE:_contig_1809	6478	8664	-	espL4	1-2187/2187	===============	0/0	100	98.99	vfdb	NP_290644	(espL4) Type III secretion system effector EspL4 [LEE encoded T3SS (SS020)] [Escherichia coli O157:H7 str. EDL933]
DTU_2024_1036883_100_MG_LVK_43_SE.metabat2.bin.292.fa	DTU_2024_1036883_100_MG_LVK_43_SE:_contig_1809	43125	44705	+	espX4	1-1581/1581	===============	0/0	100	98.23	vfdb	NP_290672	(espX4) Type III secretion system effector EspX4 [LEE encoded T3SS (SS020)] [Escherichia coli O157:H7 str. EDL933]
DTU_2024_1036883_100_MG_LVK_43_SE.metabat2.bin.292.fa	DTU_2024_1036883_100_MG_LVK_43_SE:_contig_1809	74216	75508	-	espX5	1-1293/1293	===============	0/0	100	97.45	vfdb	NP_290699	(espX5) Type III secretion system effector EspX5 [LEE encoded T3SS (SS020)] [Escherichia coli O157:H7 str. EDL933]
DTU_2024_1036883_100_MG_LVK_43_SE.metabat2.bin.292.fa	DTU_2024_1036883_100_MG_LVK_43_SE:_contig_2841	200421	201473	+	ompA	1-1041/1041	========/======	2025-12-01	100	94.59	vfdb	AAF37887	(ompA) outer membrane protein A [OmpA (VF0236)] [Escherichia coli O18:K1:H7 str. RS218]
DTU_2024_1036884_100_MG_LVK_48_SE.metabat2.bin.50.fa	DTU_2024_1036884_100_MG_LVK_48_SE:_contig_11348	150976	151933	-	stx2A	1-958/960	===============	0/0	99.79	94.26	vfdb	NP_286976	(stx2A) shiga-like toxin II A subunit encoded by bacteriophage BP-933W [Stx (VF0206)] [Escherichia coli O157:H7 str. EDL933]
DTU_2024_1036884_100_MG_LVK_48_SE.metabat2.bin.50.fa	DTU_2024_1036884_100_MG_LVK_48_SE:_contig_8699	115581	116003	-	gspM	1-423/423	===============	0/0	100	94.09	vfdb	YP_404609	(gspM) general secretion pathway protein M [T2SS (VF0333)] [Shigella dysenteriae Sd197]
DTU_2024_1036884_100_MG_LVK_48_SE.metabat2.bin.50.fa	DTU_2024_1036884_100_MG_LVK_48_SE:_contig_8699	116119	116979	-	gspL	1-861/861	===============	0/0	100	97.56	vfdb	YP_404608	(gspL) general secretion pathway protein L [T2SS (VF0333)] [Shigella dysenteriae Sd197]
DTU_2024_1036884_100_MG_LVK_48_SE.metabat2.bin.50.fa	DTU_2024_1036884_100_MG_LVK_48_SE:_contig_8699	117294	118271	-	gspK	1-978/978	===============	0/0	100	97.75	vfdb	YP_404607	(gspK) general secretion pathway protein K [T2SS (VF0333)] [Shigella dysenteriae Sd197]
DTU_2024_1036884_100_MG_LVK_48_SE.metabat2.bin.50.fa	DTU_2024_1036884_100_MG_LVK_48_SE:_contig_8699	118268	118837	-	gspJ	1-570/570	===============	0/0	100	97.19	vfdb	YP_404606	(gspJ) general secretion pathway protein J [T2SS (VF0333)] [Shigella dysenteriae Sd197]
DTU_2024_1036884_100_MG_LVK_48_SE.metabat2.bin.50.fa	DTU_2024_1036884_100_MG_LVK_48_SE:_contig_8699	118870	119241	-	gspI	1-372/372	===============	0/0	100	94.62	vfdb	YP_404605	(gspI) general secretion pathway protein I [T2SS (VF0333)] [Shigella dysenteriae Sd197]
DTU_2024_1036884_100_MG_LVK_48_SE.metabat2.bin.50.fa	DTU_2024_1036884_100_MG_LVK_48_SE:_contig_8699	119238	119768	-	gspH	1-531/531	===============	0/0	100	95.86	vfdb	YP_404604	(gspH) general secretion pathway protein H [T2SS (VF0333)] [Shigella dysenteriae Sd197]
DTU_2024_1036884_100_MG_LVK_48_SE.metabat2.bin.50.fa	DTU_2024_1036884_100_MG_LVK_48_SE:_contig_8699	119805	120260	-	gspG	1-456/456	===============	0/0	100	95.61	vfdb	YP_404603	(gspG) general secretion pathway protein G [T2SS (VF0333)] [Shigella dysenteriae Sd197]
DTU_2024_1036884_100_MG_LVK_48_SE.metabat2.bin.50.fa	DTU_2024_1036884_100_MG_LVK_48_SE:_contig_8699	120301	121500	-	gspF	1-1200/1200	===============	0/0	100	96.25	vfdb	YP_404602	(gspF) general secretion pathway protein F [T2SS (VF0333)] [Shigella dysenteriae Sd197]
DTU_2024_1036884_100_MG_LVK_48_SE.metabat2.bin.50.fa	DTU_2024_1036884_100_MG_LVK_48_SE:_contig_8699	121500	122993	-	gspE	1-1494/1494	===============	0/0	100	96.79	vfdb	YP_404601	(gspE) general secretion pathway protein E [T2SS (VF0333)] [Shigella dysenteriae Sd197]
DTU_2024_1036884_100_MG_LVK_48_SE.metabat2.bin.50.fa	DTU_2024_1036884_100_MG_LVK_48_SE:_contig_8699	122993	124843	-	gspD	1-1836/1836	========/======	2015-01-01	100	97.35	vfdb	YP_404600	(gspD) general secretion pathway protein D [T2SS (VF0333)] [Shigella dysenteriae Sd197]
DTU_2024_1036884_100_MG_LVK_48_SE.metabat2.bin.50.fa	DTU_2024_1036884_100_MG_LVK_48_SE:_contig_8699	125083	125913	-	gspC	1-831/831	===============	0/0	100	95.07	vfdb	YP_404599	(gspC) general secretion pathway protein C [T2SS (VF0333)] [Shigella dysenteriae Sd197]
DTU_2024_1036884_100_MG_LVK_48_SE.metabat2.bin.50.fa	DTU_2024_1036884_100_MG_LVK_48_SE:_contig_8699	265650	266480	+	gspC	1-831/831	===============	0/0	100	93.5	vfdb	YP_404599	(gspC) general secretion pathway protein C [T2SS (VF0333)] [Shigella dysenteriae Sd197]
DTU_2024_1036884_100_MG_LVK_48_SE.metabat2.bin.50.fa	DTU_2024_1036884_100_MG_LVK_48_SE:_contig_8699	266720	268570	+	gspD	1-1836/1836	========/======	2015-01-01	100	94.06	vfdb	YP_404600	(gspD) general secretion pathway protein D [T2SS (VF0333)] [Shigella dysenteriae Sd197]
DTU_2024_1036884_100_MG_LVK_48_SE.metabat2.bin.50.fa	DTU_2024_1036884_100_MG_LVK_48_SE:_contig_8699	268570	270063	+	gspE	1-1494/1494	===============	0/0	100	95.25	vfdb	YP_404601	(gspE) general secretion pathway protein E [T2SS (VF0333)] [Shigella dysenteriae Sd197]
DTU_2024_1036884_100_MG_LVK_48_SE.metabat2.bin.50.fa	DTU_2024_1036884_100_MG_LVK_48_SE:_contig_8699	270063	271262	+	gspF	1-1200/1200	===============	0/0	100	94.83	vfdb	YP_404602	(gspF) general secretion pathway protein F [T2SS (VF0333)] [Shigella dysenteriae Sd197]
DTU_2024_1036884_100_MG_LVK_48_SE.metabat2.bin.50.fa	DTU_2024_1036884_100_MG_LVK_48_SE:_contig_8699	271303	271758	+	gspG	1-456/456	===============	0/0	100	96.05	vfdb	YP_404603	(gspG) general secretion pathway protein G [T2SS (VF0333)] [Shigella dysenteriae Sd197]
DTU_2024_1036884_100_MG_LVK_48_SE.metabat2.bin.50.fa	DTU_2024_1036884_100_MG_LVK_48_SE:_contig_8699	271795	272325	+	gspH	1-531/531	===============	0/0	100	96.05	vfdb	YP_404604	(gspH) general secretion pathway protein H [T2SS (VF0333)] [Shigella dysenteriae Sd197]
DTU_2024_1036884_100_MG_LVK_48_SE.metabat2.bin.50.fa	DTU_2024_1036884_100_MG_LVK_48_SE:_contig_8699	272322	272693	+	gspI	1-372/372	===============	0/0	100	94.09	vfdb	YP_404605	(gspI) general secretion pathway protein I [T2SS (VF0333)] [Shigella dysenteriae Sd197]
DTU_2024_1036884_100_MG_LVK_48_SE.metabat2.bin.50.fa	DTU_2024_1036884_100_MG_LVK_48_SE:_contig_8699	272726	273295	+	gspJ	1-570/570	===============	0/0	100	92.98	vfdb	YP_404606	(gspJ) general secretion pathway protein J [T2SS (VF0333)] [Shigella dysenteriae Sd197]
DTU_2024_1036884_100_MG_LVK_48_SE.metabat2.bin.50.fa	DTU_2024_1036884_100_MG_LVK_48_SE:_contig_8699	273292	274269	+	gspK	1-978/978	===============	0/0	100	94.68	vfdb	YP_404607	(gspK) general secretion pathway protein K [T2SS (VF0333)] [Shigella dysenteriae Sd197]
DTU_2024_1036884_100_MG_LVK_48_SE.metabat2.bin.50.fa	DTU_2024_1036884_100_MG_LVK_48_SE:_contig_8699	274584	275444	+	gspL	1-861/861	===============	0/0	100	95.82	vfdb	YP_404608	(gspL) general secretion pathway protein L [T2SS (VF0333)] [Shigella dysenteriae Sd197]
DTU_2024_1036884_100_MG_LVK_48_SE.metabat2.bin.50.fa	DTU_2024_1036884_100_MG_LVK_48_SE:_contig_8699	275560	275982	+	gspM	1-423/423	===============	0/0	100	94.56	vfdb	YP_404609	(gspM) general secretion pathway protein M [T2SS (VF0333)] [Shigella dysenteriae Sd197]
DTU_2024_1036884_100_MG_LVK_48_SE.metabat2.bin.50.fa	DTU_2024_1036884_100_MG_LVK_48_SE:_contig_8699	1384918	1386499	+	espX4	1-1581/1581	========/======	2025-03-03	99.94	92.86	vfdb	NP_290672	(espX4) Type III secretion system effector EspX4 [LEE encoded T3SS (SS020)] [Escherichia coli O157:H7 str. EDL933]
DTU_2024_1036884_100_MG_LVK_48_SE.metabat2.bin.50.fa	DTU_2024_1036884_100_MG_LVK_48_SE:_contig_8699	1417580	1418872	-	espX5	1-1293/1293	===============	0/0	100	95.51	vfdb	NP_290699	(espX5) Type III secretion system effector EspX5 [LEE encoded T3SS (SS020)] [Escherichia coli O157:H7 str. EDL933]
DTU_2024_1036884_100_MG_LVK_48_SE.metabat2.bin.50.fa	DTU_2024_1036884_100_MG_LVK_48_SE:_contig_8699	1659331	1659845	+	fimI	26-540/540	===============	0/0	95.37	97.86	vfdb	NP_757242	(fimI) Fimbrin-like protein fimI precursor [Type 1 fimbriae (VF0221)] [Escherichia coli CFT073]
DTU_2024_1036884_100_MG_LVK_48_SE.metabat2.bin.50.fa	DTU_2024_1036884_100_MG_LVK_48_SE:_contig_8699	1659882	1660607	+	fimC	1-726/726	===============	0/0	100	98.62	vfdb	NP_757243	(fimC) Chaperone protein fimC precursor [Type 1 fimbriae (VF0221)] [Escherichia coli CFT073]
DTU_2024_1036884_100_MG_LVK_48_SE.metabat2.bin.50.fa	DTU_2024_1036884_100_MG_LVK_48_SE:_contig_8699	1660674	1663310	+	fimD	1-2637/2637	===============	0/0	100	98.6	vfdb	NP_757244	(fimD) Outer membrane usher protein fimD precursor [Type 1 fimbriae (VF0221)] [Escherichia coli CFT073]
DTU_2024_1036884_100_MG_LVK_48_SE.metabat2.bin.50.fa	DTU_2024_1036884_100_MG_LVK_48_SE:_contig_8699	1663317	1663850	+	fimF	1-534/534	===============	0/0	100	97	vfdb	NP_757245	(fimF) FimF protein precursor [Type 1 fimbriae (VF0221)] [Escherichia coli CFT073]
DTU_2024_1036884_100_MG_LVK_48_SE.metabat2.bin.50.fa	DTU_2024_1036884_100_MG_LVK_48_SE:_contig_8699	1663863	1664366	+	fimG	1-504/504	===============	0/0	100	97.82	vfdb	NP_757247	(fimG) FimG protein precursor [Type 1 fimbriae (VF0221)] [Escherichia coli CFT073]
DTU_2024_1036884_100_MG_LVK_48_SE.metabat2.bin.50.fa	DTU_2024_1036884_100_MG_LVK_48_SE:_contig_8699	1664377	1665288	+	fimH	1-912/912	===============	0/0	100	97.26	vfdb	NP_757248	(fimH) FimH protein precursor [Type 1 fimbriae (VF0221)] [Escherichia coli CFT073]
DTU_2024_1036884_100_MG_LVK_48_SE.metabat2.bin.50.fa	DTU_2024_1036884_100_MG_LVK_48_SE:_contig_8699	1776270	1777690	-	espX1	1-1422/1422	========/======	2025-01-01	99.93	94.37	vfdb	NP_285716	(espX1) Type III secretion system effector EspX1 [LEE encoded T3SS (SS020)] [Escherichia coli O157:H7 str. EDL933]
DTU_2024_1036884_100_MG_LVK_48_SE.metabat2.bin.50.fa	DTU_2024_1036884_100_MG_LVK_48_SE:_contig_8699	2405466	2406236	-	entD	1-771/771	===============	0/0	100	94.03	vfdb	NP_752599	(entD) phosphopantetheinyl transferase component of enterobactin synthase multienzyme complex [Enterobactin (VF0228)] [Escherichia coli CFT073]
DTU_2024_1036884_100_MG_LVK_48_SE.metabat2.bin.50.fa	DTU_2024_1036884_100_MG_LVK_48_SE:_contig_8699	2406261	2408501	-	fepA	1-2241/2241	===============	0/0	100	96.79	vfdb	NP_752600	(fepA) ferrienterobactin outer membrane transporter [Enterobactin (VF0228)] [Escherichia coli CFT073]
DTU_2024_1036884_100_MG_LVK_48_SE.metabat2.bin.50.fa	DTU_2024_1036884_100_MG_LVK_48_SE:_contig_8699	2408744	2409946	+	fes	1-1203/1203	===============	0/0	100	96.51	vfdb	NP_752602	(fes) enterobactin/ferric enterobactin esterase [enterobactin (IA019)] [Escherichia coli CFT073]
DTU_2024_1036884_100_MG_LVK_48_SE.metabat2.bin.50.fa	DTU_2024_1036884_100_MG_LVK_48_SE:_contig_8699	2410164	2413993	+	entF	1-3830/3882	===============	0/0	98.66	95.85	vfdb	NP_752604	(entF) enterobactin synthase multienzyme complex component ATP-dependent [Enterobactin (VF0228)] [Escherichia coli CFT073]
DTU_2024_1036884_100_MG_LVK_48_SE.metabat2.bin.50.fa	DTU_2024_1036884_100_MG_LVK_48_SE:_contig_8699	2415392	2416207	-	fepC	1-816/816	===============	0/0	100	97.18	vfdb	NP_752606	(fepC) ferrienterobactin ABC transporter ATPase [Enterobactin (VF0228)] [Escherichia coli CFT073]
DTU_2024_1036884_100_MG_LVK_48_SE.metabat2.bin.50.fa	DTU_2024_1036884_100_MG_LVK_48_SE:_contig_8699	2416204	2417196	-	fepG	1-993/993	===============	0/0	100	94.76	vfdb	NP_752607	(fepG) iron-enterobactin ABC transporter permease [Enterobactin (VF0228)] [Escherichia coli CFT073]
DTU_2024_1036884_100_MG_LVK_48_SE.metabat2.bin.50.fa	DTU_2024_1036884_100_MG_LVK_48_SE:_contig_8699	2417193	2418209	-	fepD	1-1017/1017	===============	0/0	100	96.36	vfdb	NP_752608	(fepD) ferrienterobactin ABC transporter permease [Enterobactin (VF0228)] [Escherichia coli CFT073]
DTU_2024_1036884_100_MG_LVK_48_SE.metabat2.bin.50.fa	DTU_2024_1036884_100_MG_LVK_48_SE:_contig_8699	2418308	2419558	+	entS	1-1251/1251	===============	0/0	100	95.6	vfdb	NP_752609	(entS) enterobactin exporter iron-regulated [enterobactin (IA019)] [Escherichia coli CFT073]
DTU_2024_1036884_100_MG_LVK_48_SE.metabat2.bin.50.fa	DTU_2024_1036884_100_MG_LVK_48_SE:_contig_8699	2419562	2420518	-	fepB	1-957/957	===============	0/0	100	97.28	vfdb	NP_752610	(fepB) ferrienterobactin ABC transporter periplasmic binding protein [Enterobactin (VF0228)] [Escherichia coli CFT073]
DTU_2024_1036884_100_MG_LVK_48_SE.metabat2.bin.50.fa	DTU_2024_1036884_100_MG_LVK_48_SE:_contig_8699	2420881	2422068	+	entC	1-1188/1188	===============	0/0	100	97.56	vfdb	NP_752611	(entC) isochorismate synthase 1 [Enterobactin (VF0228)] [Escherichia coli CFT073]
DTU_2024_1036884_100_MG_LVK_48_SE.metabat2.bin.50.fa	DTU_2024_1036884_100_MG_LVK_48_SE:_contig_8699	2422078	2423688	+	entE	1-1611/1611	===============	0/0	100	95.97	vfdb	NP_752612	(entE) 23-dihydroxybenzoate-AMP ligase component of enterobactin synthase multienzyme complex [Enterobactin (VF0228)] [Escherichia coli CFT073]
DTU_2024_1036884_100_MG_LVK_48_SE.metabat2.bin.50.fa	DTU_2024_1036884_100_MG_LVK_48_SE:_contig_8699	2423702	2424559	+	entB	1-858/858	===============	0/0	100	98.02	vfdb	NP_752613	(entB) isochorismatase [Enterobactin (VF0228)] [Escherichia coli CFT073]
DTU_2024_1036884_100_MG_LVK_48_SE.metabat2.bin.50.fa	DTU_2024_1036884_100_MG_LVK_48_SE:_contig_8699	2424559	2425305	+	entA	1-747/747	===============	0/0	100	95.98	vfdb	NP_752614	(entA) 23-dihydro-23-dihydroxybenzoate dehydrogenase [Enterobactin (VF0228)] [Escherichia coli CFT073]
DTU_2024_1036884_100_MG_LVK_48_SE.metabat2.bin.50.fa	DTU_2024_1036884_100_MG_LVK_48_SE:_contig_8699	2855557	2856609	-	ompA	1-1041/1041	========/======	2025-12-01	100	94.3	vfdb	AAF37887	(ompA) outer membrane protein A [OmpA (VF0236)] [Escherichia coli O18:K1:H7 str. RS218]
DTU_2024_1036886_100_MG_LVK_56_SE.metabat2.bin.463.fa	DTU_2024_1036886_100_MG_LVK_56_SE:_contig_14907	19913	21493	-	espX4	1-1581/1581	========/======	2025-02-02	99.94	93.3	vfdb	NP_290672	(espX4) Type III secretion system effector EspX4 [LEE encoded T3SS (SS020)] [Escherichia coli O157:H7 str. EDL933]
DTU_2024_1036886_100_MG_LVK_56_SE.metabat2.bin.463.fa	DTU_2024_1036886_100_MG_LVK_56_SE:_contig_14907	1230821	1231651	+	gspC	1-831/831	===============	0/0	100	95.31	vfdb	YP_404599	(gspC) general secretion pathway protein C [T2SS (VF0333)] [Shigella dysenteriae Sd197]
DTU_2024_1036886_100_MG_LVK_56_SE.metabat2.bin.463.fa	DTU_2024_1036886_100_MG_LVK_56_SE:_contig_14907	1231891	1233741	+	gspD	1-1836/1836	========/======	2015-01-01	100	97.78	vfdb	YP_404600	(gspD) general secretion pathway protein D [T2SS (VF0333)] [Shigella dysenteriae Sd197]
DTU_2024_1036886_100_MG_LVK_56_SE.metabat2.bin.463.fa	DTU_2024_1036886_100_MG_LVK_56_SE:_contig_14907	1233741	1235234	+	gspE	1-1494/1494	===============	0/0	100	96.45	vfdb	YP_404601	(gspE) general secretion pathway protein E [T2SS (VF0333)] [Shigella dysenteriae Sd197]
DTU_2024_1036886_100_MG_LVK_56_SE.metabat2.bin.463.fa	DTU_2024_1036886_100_MG_LVK_56_SE:_contig_14907	1235234	1236433	+	gspF	1-1200/1200	===============	0/0	100	96.75	vfdb	YP_404602	(gspF) general secretion pathway protein F [T2SS (VF0333)] [Shigella dysenteriae Sd197]
DTU_2024_1036886_100_MG_LVK_56_SE.metabat2.bin.463.fa	DTU_2024_1036886_100_MG_LVK_56_SE:_contig_14907	1236474	1236929	+	gspG	1-456/456	===============	0/0	100	95.83	vfdb	YP_404603	(gspG) general secretion pathway protein G [T2SS (VF0333)] [Shigella dysenteriae Sd197]
DTU_2024_1036886_100_MG_LVK_56_SE.metabat2.bin.463.fa	DTU_2024_1036886_100_MG_LVK_56_SE:_contig_14907	1236966	1237496	+	gspH	1-531/531	===============	0/0	100	95.86	vfdb	YP_404604	(gspH) general secretion pathway protein H [T2SS (VF0333)] [Shigella dysenteriae Sd197]
DTU_2024_1036886_100_MG_LVK_56_SE.metabat2.bin.463.fa	DTU_2024_1036886_100_MG_LVK_56_SE:_contig_14907	1237493	1237864	+	gspI	1-372/372	===============	0/0	100	95.16	vfdb	YP_404605	(gspI) general secretion pathway protein I [T2SS (VF0333)] [Shigella dysenteriae Sd197]
DTU_2024_1036886_100_MG_LVK_56_SE.metabat2.bin.463.fa	DTU_2024_1036886_100_MG_LVK_56_SE:_contig_14907	1237897	1238466	+	gspJ	1-570/570	===============	0/0	100	97.02	vfdb	YP_404606	(gspJ) general secretion pathway protein J [T2SS (VF0333)] [Shigella dysenteriae Sd197]
DTU_2024_1036886_100_MG_LVK_56_SE.metabat2.bin.463.fa	DTU_2024_1036886_100_MG_LVK_56_SE:_contig_14907	1238463	1239440	+	gspK	1-978/978	===============	0/0	100	96.42	vfdb	YP_404607	(gspK) general secretion pathway protein K [T2SS (VF0333)] [Shigella dysenteriae Sd197]
DTU_2024_1036886_100_MG_LVK_56_SE.metabat2.bin.463.fa	DTU_2024_1036886_100_MG_LVK_56_SE:_contig_14907	1239755	1240615	+	gspL	1-861/861	===============	0/0	100	97.79	vfdb	YP_404608	(gspL) general secretion pathway protein L [T2SS (VF0333)] [Shigella dysenteriae Sd197]
DTU_2024_1036886_100_MG_LVK_56_SE.metabat2.bin.463.fa	DTU_2024_1036886_100_MG_LVK_56_SE:_contig_14907	1240731	1241153	+	gspM	1-423/423	===============	0/0	100	94.56	vfdb	YP_404609	(gspM) general secretion pathway protein M [T2SS (VF0333)] [Shigella dysenteriae Sd197]
DTU_2024_1036886_100_MG_LVK_56_SE.metabat2.bin.463.fa	DTU_2024_1036886_100_MG_LVK_56_SE:_contig_15122	88738	89790	-	ompA	1-1041/1041	========/======	2025-12-01	100	94.59	vfdb	AAF37887	(ompA) outer membrane protein A [OmpA (VF0236)] [Escherichia coli O18:K1:H7 str. RS218]
DTU_2024_1036886_100_MG_LVK_56_SE.metabat2.bin.463.fa	DTU_2024_1036886_100_MG_LVK_56_SE:_contig_18904	53198	54620	-	espX1	1-1422/1422	========/======	2025-01-01	100	95.36	vfdb	NP_285716	(espX1) Type III secretion system effector EspX1 [LEE encoded T3SS (SS020)] [Escherichia coli O157:H7 str. EDL933]
DTU_2024_1036886_100_MG_LVK_56_SE.metabat2.bin.463.fa	DTU_2024_1036886_100_MG_LVK_56_SE:_contig_18907	14624	15377	-	yagV/ecpE	1-754/756	===============	0/0	99.74	97.08	vfdb	NP_286006	(yagV/ecpE) E. coli common pilus chaperone EcpE [ECP (VF0404)] [Escherichia coli O157:H7 str. EDL933]
DTU_2024_1036886_100_MG_LVK_56_SE.metabat2.bin.463.fa	DTU_2024_1036886_100_MG_LVK_56_SE:_contig_18907	15301	16945	-	yagW/ecpD	1-1644/1644	========/======	2025-01-01	100	98.78	vfdb	NP_286007	(yagW/ecpD) polymerized tip adhesin of ECP fibers [ECP (VF0404)] [Escherichia coli O157:H7 str. EDL933]
DTU_2024_1036886_100_MG_LVK_56_SE.metabat2.bin.463.fa	DTU_2024_1036886_100_MG_LVK_56_SE:_contig_18907	16935	19460	-	yagX/ecpC	1-2526/2526	===============	0/0	100	98.93	vfdb	NP_286008	(yagX/ecpC) E. coli common pilus usher EcpC [ECP (VF0404)] [Escherichia coli O157:H7 str. EDL933]
DTU_2024_1036886_100_MG_LVK_56_SE.metabat2.bin.463.fa	DTU_2024_1036886_100_MG_LVK_56_SE:_contig_18907	19486	20154	-	yagY/ecpB	1-669/669	===============	0/0	100	98.5	vfdb	NP_286009	(yagY/ecpB) E. coli common pilus chaperone EcpB [ECP (VF0404)] [Escherichia coli O157:H7 str. EDL933]
DTU_2024_1036886_100_MG_LVK_56_SE.metabat2.bin.463.fa	DTU_2024_1036886_100_MG_LVK_56_SE:_contig_18907	20212	20799	-	yagZ/ecpA	1-588/588	===============	0/0	100	99.15	vfdb	NP_286010	(yagZ/ecpA) E. coli common pilus structural subunit EcpA [ECP (VF0404)] [Escherichia coli O157:H7 str. EDL933]
DTU_2024_1036886_100_MG_LVK_56_SE.metabat2.bin.463.fa	DTU_2024_1036886_100_MG_LVK_56_SE:_contig_18907	20874	21464	-	ykgK/ecpR	1-591/591	===============	0/0	100	97.29	vfdb	NP_286011	(ykgK/ecpR) regulator protein EcpR [ECP (VF0404)] [Escherichia coli O157:H7 str. EDL933]
DTU_2024_1036886_100_MG_LVK_56_SE.metabat2.bin.463.fa	DTU_2024_1036886_100_MG_LVK_56_SE:_contig_18907	24485	28733	+	fdeC	1-4246/4251	========/======	2025-03-01	99.88	94.23	vfdb	YP_002390132	(fdeC) adhesin FdeC [FdeC (VF0506)] [Escherichia coli O45:K1:H7 str. S88]
DTU_2024_1036886_100_MG_LVK_56_SE.metabat2.bin.463.fa	DTU_2024_1036886_100_MG_LVK_56_SE:_contig_18907	344676	345446	-	entD	1-771/771	===============	0/0	100	94.29	vfdb	NP_752599	(entD) phosphopantetheinyl transferase component of enterobactin synthase multienzyme complex [Enterobactin (VF0228)] [Escherichia coli CFT073]
DTU_2024_1036886_100_MG_LVK_56_SE.metabat2.bin.463.fa	DTU_2024_1036886_100_MG_LVK_56_SE:_contig_18907	345471	347711	-	fepA	1-2241/2241	===============	0/0	100	97.46	vfdb	NP_752600	(fepA) ferrienterobactin outer membrane transporter [Enterobactin (VF0228)] [Escherichia coli CFT073]
DTU_2024_1036886_100_MG_LVK_56_SE.metabat2.bin.463.fa	DTU_2024_1036886_100_MG_LVK_56_SE:_contig_18907	347954	349156	+	fes	1-1203/1203	===============	0/0	100	96.67	vfdb	NP_752602	(fes) enterobactin/ferric enterobactin esterase [enterobactin (IA019)] [Escherichia coli CFT073]
DTU_2024_1036886_100_MG_LVK_56_SE.metabat2.bin.463.fa	DTU_2024_1036886_100_MG_LVK_56_SE:_contig_18907	349374	353229	+	entF	1-3854/3882	========/======	2025-02-02	99.28	95.83	vfdb	NP_752604	(entF) enterobactin synthase multienzyme complex component ATP-dependent [Enterobactin (VF0228)] [Escherichia coli CFT073]
DTU_2024_1036886_100_MG_LVK_56_SE.metabat2.bin.463.fa	DTU_2024_1036886_100_MG_LVK_56_SE:_contig_18907	354604	355419	-	fepC	1-816/816	===============	0/0	100	97.79	vfdb	NP_752606	(fepC) ferrienterobactin ABC transporter ATPase [Enterobactin (VF0228)] [Escherichia coli CFT073]
DTU_2024_1036886_100_MG_LVK_56_SE.metabat2.bin.463.fa	DTU_2024_1036886_100_MG_LVK_56_SE:_contig_18907	355416	356408	-	fepG	1-993/993	===============	0/0	100	94.66	vfdb	NP_752607	(fepG) iron-enterobactin ABC transporter permease [Enterobactin (VF0228)] [Escherichia coli CFT073]
DTU_2024_1036886_100_MG_LVK_56_SE.metabat2.bin.463.fa	DTU_2024_1036886_100_MG_LVK_56_SE:_contig_18907	356405	357421	-	fepD	1-1017/1017	===============	0/0	100	96.07	vfdb	NP_752608	(fepD) ferrienterobactin ABC transporter permease [Enterobactin (VF0228)] [Escherichia coli CFT073]
DTU_2024_1036886_100_MG_LVK_56_SE.metabat2.bin.463.fa	DTU_2024_1036886_100_MG_LVK_56_SE:_contig_18907	357520	358770	+	entS	1-1251/1251	===============	0/0	100	95.52	vfdb	NP_752609	(entS) enterobactin exporter iron-regulated [enterobactin (IA019)] [Escherichia coli CFT073]
DTU_2024_1036886_100_MG_LVK_56_SE.metabat2.bin.463.fa	DTU_2024_1036886_100_MG_LVK_56_SE:_contig_18907	358774	359730	-	fepB	1-957/957	===============	0/0	100	97.6	vfdb	NP_752610	(fepB) ferrienterobactin ABC transporter periplasmic binding protein [Enterobactin (VF0228)] [Escherichia coli CFT073]
DTU_2024_1036886_100_MG_LVK_56_SE.metabat2.bin.463.fa	DTU_2024_1036886_100_MG_LVK_56_SE:_contig_18907	360090	361277	+	entC	1-1188/1188	===============	0/0	100	97.14	vfdb	NP_752611	(entC) isochorismate synthase 1 [Enterobactin (VF0228)] [Escherichia coli CFT073]
DTU_2024_1036886_100_MG_LVK_56_SE.metabat2.bin.463.fa	DTU_2024_1036886_100_MG_LVK_56_SE:_contig_18907	361287	362897	+	entE	1-1611/1611	===============	0/0	100	96.03	vfdb	NP_752612	(entE) 23-dihydroxybenzoate-AMP ligase component of enterobactin synthase multienzyme complex [Enterobactin (VF0228)] [Escherichia coli CFT073]
DTU_2024_1036886_100_MG_LVK_56_SE.metabat2.bin.463.fa	DTU_2024_1036886_100_MG_LVK_56_SE:_contig_18907	362911	363768	+	entB	1-858/858	===============	0/0	100	98.37	vfdb	NP_752613	(entB) isochorismatase [Enterobactin (VF0228)] [Escherichia coli CFT073]
DTU_2024_1036886_100_MG_LVK_56_SE.metabat2.bin.463.fa	DTU_2024_1036886_100_MG_LVK_56_SE:_contig_18907	363768	364514	+	entA	1-747/747	===============	0/0	100	95.98	vfdb	NP_752614	(entA) 23-dihydro-23-dihydroxybenzoate dehydrogenase [Enterobactin (VF0228)] [Escherichia coli CFT073]
DTU_2024_1036886_100_MG_LVK_56_SE.metabat2.bin.463.fa	DTU_2024_1036886_100_MG_LVK_56_SE:_contig_7641	28490	29782	-	espX5	1-1293/1293	===============	0/0	100	96.06	vfdb	NP_290699	(espX5) Type III secretion system effector EspX5 [LEE encoded T3SS (SS020)] [Escherichia coli O157:H7 str. EDL933]
DTU_2024_1036886_100_MG_LVK_56_SE.metabat2.bin.463.fa	DTU_2024_1036886_100_MG_LVK_56_SE:_contig_8174	203660	205559	+	espL1	1-1899/1899	========/======	2025-01-01	100	95.84	vfdb	NP_288154	(espL1) Type III secretion system effector espL1 [LEE encoded T3SS (SS020)] [Escherichia coli O157:H7 str. EDL933]
DTU_2024_1036886_100_MG_LVK_56_SE.metabat2.bin.463.fa	DTU_2024_1036886_100_MG_LVK_56_SE:_contig_8174	447842	449146	-	ybtS	1-1305/1305	===============	0/0	100	99.69	vfdb	NP_405477	(ybtS) salicylate synthase Irp9 [Yersiniabactin (VF0136)] [Yersinia pestis CO92]
DTU_2024_1036886_100_MG_LVK_56_SE.metabat2.bin.463.fa	DTU_2024_1036886_100_MG_LVK_56_SE:_contig_8174	449174	450454	-	ybtX	1-1281/1281	===============	0/0	100	99.61	vfdb	NP_405476	(ybtX) putative signal transducer [Yersiniabactin (VF0136)] [Yersinia pestis CO92]
DTU_2024_1036886_100_MG_LVK_56_SE.metabat2.bin.463.fa	DTU_2024_1036886_100_MG_LVK_56_SE:_contig_8174	450447	452249	-	ybtQ	1-1803/1803	===============	0/0	100	99.78	vfdb	NP_405475	(ybtQ) inner membrane ABC-transporter YbtQ [Yersiniabactin (VF0136)] [Yersinia pestis CO92]
DTU_2024_1036886_100_MG_LVK_56_SE.metabat2.bin.463.fa	DTU_2024_1036886_100_MG_LVK_56_SE:_contig_8174	452236	454038	-	ybtP	1-1803/1803	===============	0/0	100	99.67	vfdb	NP_405474	(ybtP) lipoprotein inner membrane ABC-transporter [Yersiniabactin (VF0136)] [Yersinia pestis CO92]
DTU_2024_1036886_100_MG_LVK_56_SE.metabat2.bin.463.fa	DTU_2024_1036886_100_MG_LVK_56_SE:_contig_8174	454205	455164	+	ybtA	1-960/960	===============	0/0	100	99.48	vfdb	NP_405473	(ybtA) transcriptional regulator YbtA [Yersiniabactin (VF0136)] [Yersinia pestis CO92]
DTU_2024_1036886_100_MG_LVK_56_SE.metabat2.bin.463.fa	DTU_2024_1036886_100_MG_LVK_56_SE:_contig_8174	455355	461462	+	irp2	1-6108/6108	===============	0/0	100	99.51	vfdb	NP_405472	(irp2) yersiniabactin biosynthetic protein Irp2 [Yersiniabactin (VF0136)] [Yersinia pestis CO92]
DTU_2024_1036886_100_MG_LVK_56_SE.metabat2.bin.463.fa	DTU_2024_1036886_100_MG_LVK_56_SE:_contig_8174	461550	471041	+	irp1	1-9492/9492	===============	0/0	100	99.68	vfdb	NP_405471	(irp1) yersiniabactin biosynthetic protein Irp1 [Yersiniabactin (VF0136)] [Yersinia pestis CO92]
DTU_2024_1036886_100_MG_LVK_56_SE.metabat2.bin.463.fa	DTU_2024_1036886_100_MG_LVK_56_SE:_contig_8174	471038	472138	+	ybtU	1-1101/1101	===============	0/0	100	99.55	vfdb	NP_405470	(ybtU) yersiniabactin biosynthetic protein YbtU [Yersiniabactin (VF0136)] [Yersinia pestis CO92]
DTU_2024_1036886_100_MG_LVK_56_SE.metabat2.bin.463.fa	DTU_2024_1036886_100_MG_LVK_56_SE:_contig_8174	472135	472938	+	ybtT	1-804/804	===============	0/0	100	99.75	vfdb	NP_405469	(ybtT) yersiniabactin biosynthetic protein YbtT [Yersiniabactin (VF0136)] [Yersinia pestis CO92]
DTU_2024_1036886_100_MG_LVK_56_SE.metabat2.bin.463.fa	DTU_2024_1036886_100_MG_LVK_56_SE:_contig_8174	472942	474519	+	ybtE	1-1578/1578	===============	0/0	100	99.87	vfdb	NP_405468	(ybtE) yersiniabactin siderophore biosynthetic protein [Yersiniabactin (VF0136)] [Yersinia pestis CO92]
DTU_2024_1036886_100_MG_LVK_56_SE.metabat2.bin.463.fa	DTU_2024_1036886_100_MG_LVK_56_SE:_contig_8174	474650	476671	+	fyuA	1-2022/2022	===============	0/0	100	99.95	vfdb	NP_405467	(fyuA) pesticin/yersiniabactin receptor protein [Yersiniabactin (VF0136)] [Yersinia pestis CO92]
DTU_2024_1036889_100_MG_LVK_74_SE.metabat2.bin.192.fa	DTU_2024_1036889_100_MG_LVK_74_SE:_contig_12072	149593	150363	-	entD	1-771/771	===============	0/0	100	95.07	vfdb	NP_752599	(entD) phosphopantetheinyl transferase component of enterobactin synthase multienzyme complex [Enterobactin (VF0228)] [Escherichia coli CFT073]
DTU_2024_1036889_100_MG_LVK_74_SE.metabat2.bin.192.fa	DTU_2024_1036889_100_MG_LVK_74_SE:_contig_12072	150388	152628	-	fepA	1-2241/2241	===============	0/0	100	96.74	vfdb	NP_752600	(fepA) ferrienterobactin outer membrane transporter [Enterobactin (VF0228)] [Escherichia coli CFT073]
DTU_2024_1036889_100_MG_LVK_74_SE.metabat2.bin.192.fa	DTU_2024_1036889_100_MG_LVK_74_SE:_contig_12072	152871	154073	+	fes	1-1203/1203	===============	0/0	100	96.67	vfdb	NP_752602	(fes) enterobactin/ferric enterobactin esterase [enterobactin (IA019)] [Escherichia coli CFT073]
DTU_2024_1036889_100_MG_LVK_74_SE.metabat2.bin.192.fa	DTU_2024_1036889_100_MG_LVK_74_SE:_contig_12072	154291	158144	+	entF	1-3854/3882	===============	0/0	99.28	95.64	vfdb	NP_752604	(entF) enterobactin synthase multienzyme complex component ATP-dependent [Enterobactin (VF0228)] [Escherichia coli CFT073]
DTU_2024_1036889_100_MG_LVK_74_SE.metabat2.bin.192.fa	DTU_2024_1036889_100_MG_LVK_74_SE:_contig_12072	161345	162160	-	fepC	1-816/816	===============	0/0	100	97.3	vfdb	NP_752606	(fepC) ferrienterobactin ABC transporter ATPase [Enterobactin (VF0228)] [Escherichia coli CFT073]
DTU_2024_1036889_100_MG_LVK_74_SE.metabat2.bin.192.fa	DTU_2024_1036889_100_MG_LVK_74_SE:_contig_12072	162157	163149	-	fepG	1-993/993	===============	0/0	100	94.16	vfdb	NP_752607	(fepG) iron-enterobactin ABC transporter permease [Enterobactin (VF0228)] [Escherichia coli CFT073]
DTU_2024_1036889_100_MG_LVK_74_SE.metabat2.bin.192.fa	DTU_2024_1036889_100_MG_LVK_74_SE:_contig_12072	163146	164183	-	fepD	1-1017/1017	========/======	19/25	99.8	90.77	vfdb	NP_752608	(fepD) ferrienterobactin ABC transporter permease [Enterobactin (VF0228)] [Escherichia coli CFT073]
DTU_2024_1036889_100_MG_LVK_74_SE.metabat2.bin.192.fa	DTU_2024_1036889_100_MG_LVK_74_SE:_contig_12072	166817	168040	+	entC	9-1188/1188	========/======	31/46	99.24	90.94	vfdb	NP_752611	(entC) isochorismate synthase 1 [Enterobactin (VF0228)] [Escherichia coli CFT073]
DTU_2024_1036889_100_MG_LVK_74_SE.metabat2.bin.192.fa	DTU_2024_1036889_100_MG_LVK_74_SE:_contig_12072	168050	169664	+	entE	1-1611/1611	========/======	2025-10-10	99.81	94.93	vfdb	NP_752612	(entE) 23-dihydroxybenzoate-AMP ligase component of enterobactin synthase multienzyme complex [Enterobactin (VF0228)] [Escherichia coli CFT073]
DTU_2024_1036889_100_MG_LVK_74_SE.metabat2.bin.192.fa	DTU_2024_1036889_100_MG_LVK_74_SE:_contig_12072	169678	170534	+	entB	1-858/858	========/======	2025-01-01	99.88	96.97	vfdb	NP_752613	(entB) isochorismatase [Enterobactin (VF0228)] [Escherichia coli CFT073]
DTU_2024_1036889_100_MG_LVK_74_SE.metabat2.bin.192.fa	DTU_2024_1036889_100_MG_LVK_74_SE:_contig_12072	170534	171288	+	entA	1-747/747	========/======	2025-08-08	100	93.64	vfdb	NP_752614	(entA) 23-dihydro-23-dihydroxybenzoate dehydrogenase [Enterobactin (VF0228)] [Escherichia coli CFT073]
DTU_2024_1036889_100_MG_LVK_74_SE.metabat2.bin.192.fa	DTU_2024_1036889_100_MG_LVK_74_SE:_contig_14569	33236	33774	+	fimI	1-540/540	========/======	2025-01-01	99.81	98.7	vfdb	NP_757242	(fimI) Fimbrin-like protein fimI precursor [Type 1 fimbriae (VF0221)] [Escherichia coli CFT073]
DTU_2024_1036889_100_MG_LVK_74_SE.metabat2.bin.192.fa	DTU_2024_1036889_100_MG_LVK_74_SE:_contig_14569	33811	34537	+	fimC	1-726/726	========/======	2025-01-01	100	98.21	vfdb	NP_757243	(fimC) Chaperone protein fimC precursor [Type 1 fimbriae (VF0221)] [Escherichia coli CFT073]
DTU_2024_1036889_100_MG_LVK_74_SE.metabat2.bin.192.fa	DTU_2024_1036889_100_MG_LVK_74_SE:_contig_14569	34604	37240	+	fimD	1-2637/2637	===============	0/0	100	98.48	vfdb	NP_757244	(fimD) Outer membrane usher protein fimD precursor [Type 1 fimbriae (VF0221)] [Escherichia coli CFT073]
DTU_2024_1036889_100_MG_LVK_74_SE.metabat2.bin.192.fa	DTU_2024_1036889_100_MG_LVK_74_SE:_contig_14569	37247	37780	+	fimF	1-534/534	===============	0/0	100	97.38	vfdb	NP_757245	(fimF) FimF protein precursor [Type 1 fimbriae (VF0221)] [Escherichia coli CFT073]
DTU_2024_1036889_100_MG_LVK_74_SE.metabat2.bin.192.fa	DTU_2024_1036889_100_MG_LVK_74_SE:_contig_14569	37793	38296	+	fimG	1-504/504	===============	0/0	100	98.02	vfdb	NP_757247	(fimG) FimG protein precursor [Type 1 fimbriae (VF0221)] [Escherichia coli CFT073]
DTU_2024_1036889_100_MG_LVK_74_SE.metabat2.bin.192.fa	DTU_2024_1036889_100_MG_LVK_74_SE:_contig_14569	38307	39218	+	fimH	1-912/912	===============	0/0	100	97.37	vfdb	NP_757248	(fimH) FimH protein precursor [Type 1 fimbriae (VF0221)] [Escherichia coli CFT073]
DTU_2024_1036889_100_MG_LVK_74_SE.metabat2.bin.192.fa	DTU_2024_1036889_100_MG_LVK_74_SE:_contig_14584	187218	188510	+	espX5	1-1293/1293	===============	0/0	100	96.6	vfdb	NP_290699	(espX5) Type III secretion system effector EspX5 [LEE encoded T3SS (SS020)] [Escherichia coli O157:H7 str. EDL933]
DTU_2024_1036889_100_MG_LVK_74_SE.metabat2.bin.192.fa	DTU_2024_1036889_100_MG_LVK_74_SE:_contig_14584	218011	219591	-	espX4	1-1581/1581	===============	0/0	100	96.39	vfdb	NP_290672	(espX4) Type III secretion system effector EspX4 [LEE encoded T3SS (SS020)] [Escherichia coli O157:H7 str. EDL933]
DTU_2024_1036889_100_MG_LVK_74_SE.metabat2.bin.192.fa	DTU_2024_1036889_100_MG_LVK_74_SE:_contig_14584	247807	249898	+	espL4	1-2092/2187	===============	0/0	95.66	97.23	vfdb	NP_290644	(espL4) Type III secretion system effector EspL4 [LEE encoded T3SS (SS020)] [Escherichia coli O157:H7 str. EDL933]
DTU_2024_1036889_100_MG_LVK_74_SE.metabat2.bin.192.fa	DTU_2024_1036889_100_MG_LVK_74_SE:_contig_14587	35481	36909	+	aslA	1-1428/1428	========/======	2025-01-01	100	92.86	vfdb	AAG10151	(aslA) putative arylsulfatase [AslA (VF0238)] [Escherichia coli O18:K1:H7 str. RS218]
DTU_2024_1036889_100_MG_LVK_74_SE.metabat2.bin.192.fa	DTU_2024_1036889_100_MG_LVK_74_SE:_contig_18361	207720	208501	-	espY1	1-753/753	========/======	1931-03-01	99.87	90.42	vfdb	NP_285753	(espY1) Type III secretion system effector EspY1 [LEE encoded T3SS (SS020)] [Escherichia coli O157:H7 str. EDL933]
DTU_2024_1036889_100_MG_LVK_74_SE.metabat2.bin.192.fa	DTU_2024_1036889_100_MG_LVK_74_SE:_contig_18361	246771	248192	+	espX1	1-1422/1422	========/======	2025-02-02	99.93	95.29	vfdb	NP_285716	(espX1) Type III secretion system effector EspX1 [LEE encoded T3SS (SS020)] [Escherichia coli O157:H7 str. EDL933]
DTU_2024_1036889_100_MG_LVK_74_SE.metabat2.bin.192.fa	DTU_2024_1036889_100_MG_LVK_74_SE:_contig_36477	84	1100	-	fepD	1-1017/1017	===============	0/0	100	96.07	vfdb	NP_752608	(fepD) ferrienterobactin ABC transporter permease [Enterobactin (VF0228)] [Escherichia coli CFT073]
DTU_2024_1036889_100_MG_LVK_74_SE.metabat2.bin.192.fa	DTU_2024_1036889_100_MG_LVK_74_SE:_contig_36477	1199	2449	+	entS	1-1251/1251	===============	0/0	100	95.36	vfdb	NP_752609	(entS) enterobactin exporter iron-regulated [enterobactin (IA019)] [Escherichia coli CFT073]
DTU_2024_1036889_100_MG_LVK_74_SE.metabat2.bin.192.fa	DTU_2024_1036889_100_MG_LVK_74_SE:_contig_36477	2453	3409	-	fepB	1-957/957	===============	0/0	100	97.49	vfdb	NP_752610	(fepB) ferrienterobactin ABC transporter periplasmic binding protein [Enterobactin (VF0228)] [Escherichia coli CFT073]
DTU_2024_1036889_100_MG_LVK_74_SE.metabat2.bin.192.fa	DTU_2024_1036889_100_MG_LVK_74_SE:_contig_36477	3772	4959	+	entC	1-1188/1188	===============	0/0	100	97.9	vfdb	NP_752611	(entC) isochorismate synthase 1 [Enterobactin (VF0228)] [Escherichia coli CFT073]
DTU_2024_1036889_100_MG_LVK_74_SE.metabat2.bin.192.fa	DTU_2024_1036889_100_MG_LVK_74_SE:_contig_36477	4969	6579	+	entE	1-1611/1611	===============	0/0	100	95.41	vfdb	NP_752612	(entE) 23-dihydroxybenzoate-AMP ligase component of enterobactin synthase multienzyme complex [Enterobactin (VF0228)] [Escherichia coli CFT073]
DTU_2024_1036889_100_MG_LVK_74_SE.metabat2.bin.192.fa	DTU_2024_1036889_100_MG_LVK_74_SE:_contig_36477	6593	7450	+	entB	1-858/858	===============	0/0	100	98.14	vfdb	NP_752613	(entB) isochorismatase [Enterobactin (VF0228)] [Escherichia coli CFT073]
DTU_2024_1036889_100_MG_LVK_74_SE.metabat2.bin.192.fa	DTU_2024_1036889_100_MG_LVK_74_SE:_contig_36477	7450	8196	+	entA	1-747/747	===============	0/0	100	95.72	vfdb	NP_752614	(entA) 23-dihydro-23-dihydroxybenzoate dehydrogenase [Enterobactin (VF0228)] [Escherichia coli CFT073]
DTU_2024_1036889_100_MG_LVK_74_SE.metabat2.bin.192.fa	DTU_2024_1036889_100_MG_LVK_74_SE:_contig_43112	22432	23185	-	yagV/ecpE	1-754/756	===============	0/0	99.74	97.08	vfdb	NP_286006	(yagV/ecpE) E. coli common pilus chaperone EcpE [ECP (VF0404)] [Escherichia coli O157:H7 str. EDL933]
DTU_2024_1036889_100_MG_LVK_74_SE.metabat2.bin.192.fa	DTU_2024_1036889_100_MG_LVK_74_SE:_contig_43112	23109	24752	-	yagW/ecpD	1-1644/1644	===============	0/0	100	99.09	vfdb	NP_286007	(yagW/ecpD) polymerized tip adhesin of ECP fibers [ECP (VF0404)] [Escherichia coli O157:H7 str. EDL933]
DTU_2024_1036889_100_MG_LVK_74_SE.metabat2.bin.192.fa	DTU_2024_1036889_100_MG_LVK_74_SE:_contig_43112	24742	27267	-	yagX/ecpC	1-2526/2526	===============	0/0	100	98.77	vfdb	NP_286008	(yagX/ecpC) E. coli common pilus usher EcpC [ECP (VF0404)] [Escherichia coli O157:H7 str. EDL933]
DTU_2024_1036889_100_MG_LVK_74_SE.metabat2.bin.192.fa	DTU_2024_1036889_100_MG_LVK_74_SE:_contig_43112	27293	27961	-	yagY/ecpB	1-669/669	===============	0/0	100	98.06	vfdb	NP_286009	(yagY/ecpB) E. coli common pilus chaperone EcpB [ECP (VF0404)] [Escherichia coli O157:H7 str. EDL933]
DTU_2024_1036889_100_MG_LVK_74_SE.metabat2.bin.192.fa	DTU_2024_1036889_100_MG_LVK_74_SE:_contig_43112	28019	28606	-	yagZ/ecpA	1-588/588	===============	0/0	100	98.81	vfdb	NP_286010	(yagZ/ecpA) E. coli common pilus structural subunit EcpA [ECP (VF0404)] [Escherichia coli O157:H7 str. EDL933]
DTU_2024_1036889_100_MG_LVK_74_SE.metabat2.bin.192.fa	DTU_2024_1036889_100_MG_LVK_74_SE:_contig_43112	28681	29271	-	ykgK/ecpR	1-591/591	===============	0/0	100	96.95	vfdb	NP_286011	(ykgK/ecpR) regulator protein EcpR [ECP (VF0404)] [Escherichia coli O157:H7 str. EDL933]
DTU_2024_1036889_100_MG_LVK_74_SE.metabat2.bin.192.fa	DTU_2024_1036889_100_MG_LVK_74_SE:_contig_43112	32293	36541	+	fdeC	1-4246/4251	========/======	2025-03-01	99.88	94.21	vfdb	YP_002390132	(fdeC) adhesin FdeC [FdeC (VF0506)] [Escherichia coli O45:K1:H7 str. S88]
DTU_2024_1036889_100_MG_LVK_74_SE.metabat2.bin.192.fa	DTU_2024_1036889_100_MG_LVK_74_SE:_contig_51715	7232	8063	+	gspC	1-831/831	========/======	2025-01-01	100	93.75	vfdb	YP_404599	(gspC) general secretion pathway protein C [T2SS (VF0333)] [Shigella dysenteriae Sd197]
DTU_2024_1036889_100_MG_LVK_74_SE.metabat2.bin.192.fa	DTU_2024_1036889_100_MG_LVK_74_SE:_contig_51715	8303	10155	+	gspD	1-1836/1836	========/======	2017-03-01	100	95.68	vfdb	YP_404600	(gspD) general secretion pathway protein D [T2SS (VF0333)] [Shigella dysenteriae Sd197]
DTU_2024_1036889_100_MG_LVK_74_SE.metabat2.bin.192.fa	DTU_2024_1036889_100_MG_LVK_74_SE:_contig_51715	10155	11648	+	gspE	1-1494/1494	===============	0/0	100	96.59	vfdb	YP_404601	(gspE) general secretion pathway protein E [T2SS (VF0333)] [Shigella dysenteriae Sd197]
DTU_2024_1036889_100_MG_LVK_74_SE.metabat2.bin.192.fa	DTU_2024_1036889_100_MG_LVK_74_SE:_contig_51715	11648	12847	+	gspF	1-1200/1200	===============	0/0	100	96.08	vfdb	YP_404602	(gspF) general secretion pathway protein F [T2SS (VF0333)] [Shigella dysenteriae Sd197]
DTU_2024_1036889_100_MG_LVK_74_SE.metabat2.bin.192.fa	DTU_2024_1036889_100_MG_LVK_74_SE:_contig_51715	12888	13343	+	gspG	1-456/456	===============	0/0	100	95.61	vfdb	YP_404603	(gspG) general secretion pathway protein G [T2SS (VF0333)] [Shigella dysenteriae Sd197]
DTU_2024_1036889_100_MG_LVK_74_SE.metabat2.bin.192.fa	DTU_2024_1036889_100_MG_LVK_74_SE:_contig_51715	13380	13911	+	gspH	1-531/531	========/======	2025-01-01	100	95.86	vfdb	YP_404604	(gspH) general secretion pathway protein H [T2SS (VF0333)] [Shigella dysenteriae Sd197]
DTU_2024_1036889_100_MG_LVK_74_SE.metabat2.bin.192.fa	DTU_2024_1036889_100_MG_LVK_74_SE:_contig_51715	13908	14279	+	gspI	1-372/372	===============	0/0	100	95.16	vfdb	YP_404605	(gspI) general secretion pathway protein I [T2SS (VF0333)] [Shigella dysenteriae Sd197]
DTU_2024_1036889_100_MG_LVK_74_SE.metabat2.bin.192.fa	DTU_2024_1036889_100_MG_LVK_74_SE:_contig_51715	14312	14881	+	gspJ	1-570/570	===============	0/0	100	96.67	vfdb	YP_404606	(gspJ) general secretion pathway protein J [T2SS (VF0333)] [Shigella dysenteriae Sd197]
DTU_2024_1036889_100_MG_LVK_74_SE.metabat2.bin.192.fa	DTU_2024_1036889_100_MG_LVK_74_SE:_contig_51715	14878	15855	+	gspK	1-978/978	===============	0/0	100	96.63	vfdb	YP_404607	(gspK) general secretion pathway protein K [T2SS (VF0333)] [Shigella dysenteriae Sd197]
DTU_2024_1036889_100_MG_LVK_74_SE.metabat2.bin.192.fa	DTU_2024_1036889_100_MG_LVK_74_SE:_contig_51715	16170	17030	+	gspL	1-861/861	===============	0/0	100	95.47	vfdb	YP_404608	(gspL) general secretion pathway protein L [T2SS (VF0333)] [Shigella dysenteriae Sd197]
DTU_2024_1036889_100_MG_LVK_74_SE.metabat2.bin.192.fa	DTU_2024_1036889_100_MG_LVK_74_SE:_contig_51715	17146	17569	+	gspM	1-423/423	========/======	2025-01-01	100	94.1	vfdb	YP_404609	(gspM) general secretion pathway protein M [T2SS (VF0333)] [Shigella dysenteriae Sd197]
DTU_2024_1036889_100_MG_LVK_74_SE.metabat2.bin.192.fa	DTU_2024_1036889_100_MG_LVK_74_SE:_contig_51717	61	432	+	gspI	1-372/372	===============	0/0	100	95.16	vfdb	YP_404605	(gspI) general secretion pathway protein I [T2SS (VF0333)] [Shigella dysenteriae Sd197]
DTU_2024_1036889_100_MG_LVK_74_SE.metabat2.bin.192.fa	DTU_2024_1036889_100_MG_LVK_74_SE:_contig_51717	465	1034	+	gspJ	1-570/570	===============	0/0	100	96.67	vfdb	YP_404606	(gspJ) general secretion pathway protein J [T2SS (VF0333)] [Shigella dysenteriae Sd197]
DTU_2024_1036889_100_MG_LVK_74_SE.metabat2.bin.192.fa	DTU_2024_1036889_100_MG_LVK_74_SE:_contig_51717	1031	2008	+	gspK	1-978/978	===============	0/0	100	96.93	vfdb	YP_404607	(gspK) general secretion pathway protein K [T2SS (VF0333)] [Shigella dysenteriae Sd197]
DTU_2024_1036889_100_MG_LVK_74_SE.metabat2.bin.192.fa	DTU_2024_1036889_100_MG_LVK_74_SE:_contig_51717	2323	3183	+	gspL	1-861/861	===============	0/0	100	97.1	vfdb	YP_404608	(gspL) general secretion pathway protein L [T2SS (VF0333)] [Shigella dysenteriae Sd197]
DTU_2024_1036889_100_MG_LVK_74_SE.metabat2.bin.192.fa	DTU_2024_1036889_100_MG_LVK_74_SE:_contig_51717	3299	3721	+	gspM	1-423/423	===============	0/0	100	98.34	vfdb	YP_404609	(gspM) general secretion pathway protein M [T2SS (VF0333)] [Shigella dysenteriae Sd197]
DTU_2024_1036889_100_MG_LVK_74_SE.metabat2.bin.192.fa	DTU_2024_1036889_100_MG_LVK_74_SE:_contig_78009	109085	110125	+	ompA	1-1041/1041	===============	0/0	100	98.08	vfdb	AAF37887	(ompA) outer membrane protein A [OmpA (VF0236)] [Escherichia coli O18:K1:H7 str. RS218]
DTU_2024_1036889_100_MG_LVK_74_SE.metabat2.bin.192.fa	DTU_2024_1036889_100_MG_LVK_74_SE:_contig_81381	56787	58686	-	espL1	1-1899/1899	========/======	2025-01-01	100	97.53	vfdb	NP_288154	(espL1) Type III secretion system effector espL1 [LEE encoded T3SS (SS020)] [Escherichia coli O157:H7 str. EDL933]
DTU_2024_1036892_100_MG_LVK_80_SE.metabat2.bin.175.fa	DTU_2024_1036892_100_MG_LVK_80_SE:_contig_23594	153951	155372	+	espX1	1-1422/1422	===============	0/0	100	95.36	vfdb	NP_285716	(espX1) Type III secretion system effector EspX1 [LEE encoded T3SS (SS020)] [Escherichia coli O157:H7 str. EDL933]
DTU_2024_1036892_100_MG_LVK_80_SE.metabat2.bin.175.fa	DTU_2024_1036892_100_MG_LVK_80_SE:_contig_27969	24701	25993	+	espX5	1-1293/1293	===============	0/0	100	97.14	vfdb	NP_290699	(espX5) Type III secretion system effector EspX5 [LEE encoded T3SS (SS020)] [Escherichia coli O157:H7 str. EDL933]
DTU_2024_1036892_100_MG_LVK_80_SE.metabat2.bin.175.fa	DTU_2024_1036892_100_MG_LVK_80_SE:_contig_27969	57184	58635	-	espX4	1-1448/1581	========/=====.	2025-04-04	91.59	93.32	vfdb	NP_290672	(espX4) Type III secretion system effector EspX4 [LEE encoded T3SS (SS020)] [Escherichia coli O157:H7 str. EDL933]
DTU_2024_1036892_100_MG_LVK_80_SE.metabat2.bin.175.fa	DTU_2024_1036892_100_MG_LVK_80_SE:_contig_27969	96265	98451	+	espL4	1-2187/2187	===============	0/0	100	97.3	vfdb	NP_290644	(espL4) Type III secretion system effector EspL4 [LEE encoded T3SS (SS020)] [Escherichia coli O157:H7 str. EDL933]
DTU_2024_1036892_100_MG_LVK_80_SE.metabat2.bin.175.fa	DTU_2024_1036892_100_MG_LVK_80_SE:_contig_37164	1926	2756	-	gspC	1-831/831	===============	0/0	100	94.7	vfdb	YP_404599	(gspC) general secretion pathway protein C [T2SS (VF0333)] [Shigella dysenteriae Sd197]
DTU_2024_1036892_100_MG_LVK_80_SE.metabat2.bin.175.fa	DTU_2024_1036892_100_MG_LVK_80_SE:_contig_38399	155	564	-	gspM	1-418/423	========/======	2025-12-06	96.45	93.57	vfdb	YP_404609	(gspM) general secretion pathway protein M [T2SS (VF0333)] [Shigella dysenteriae Sd197]
DTU_2024_1036892_100_MG_LVK_80_SE.metabat2.bin.175.fa	DTU_2024_1036892_100_MG_LVK_80_SE:_contig_38399	680	1541	-	gspL	1-861/861	========/======	2025-01-01	100	97.33	vfdb	YP_404608	(gspL) general secretion pathway protein L [T2SS (VF0333)] [Shigella dysenteriae Sd197]
DTU_2024_1036892_100_MG_LVK_80_SE.metabat2.bin.175.fa	DTU_2024_1036892_100_MG_LVK_80_SE:_contig_38399	1856	2834	-	gspK	1-978/978	========/======	2025-11-08	99.49	95.53	vfdb	YP_404607	(gspK) general secretion pathway protein K [T2SS (VF0333)] [Shigella dysenteriae Sd197]
DTU_2024_1036892_100_MG_LVK_80_SE.metabat2.bin.175.fa	DTU_2024_1036892_100_MG_LVK_80_SE:_contig_38399	2831	3400	-	gspJ	1-570/570	===============	0/0	100	96.67	vfdb	YP_404606	(gspJ) general secretion pathway protein J [T2SS (VF0333)] [Shigella dysenteriae Sd197]
DTU_2024_1036892_100_MG_LVK_80_SE.metabat2.bin.175.fa	DTU_2024_1036892_100_MG_LVK_80_SE:_contig_38399	3433	3804	-	gspI	1-372/372	===============	0/0	100	95.16	vfdb	YP_404605	(gspI) general secretion pathway protein I [T2SS (VF0333)] [Shigella dysenteriae Sd197]
DTU_2024_1036892_100_MG_LVK_80_SE.metabat2.bin.175.fa	DTU_2024_1036892_100_MG_LVK_80_SE:_contig_38399	3801	4332	-	gspH	1-531/531	========/======	2025-01-01	100	95.3	vfdb	YP_404604	(gspH) general secretion pathway protein H [T2SS (VF0333)] [Shigella dysenteriae Sd197]
DTU_2024_1036892_100_MG_LVK_80_SE.metabat2.bin.175.fa	DTU_2024_1036892_100_MG_LVK_80_SE:_contig_38399	4369	4824	-	gspG	1-456/456	===============	0/0	100	94.96	vfdb	YP_404603	(gspG) general secretion pathway protein G [T2SS (VF0333)] [Shigella dysenteriae Sd197]
DTU_2024_1036892_100_MG_LVK_80_SE.metabat2.bin.175.fa	DTU_2024_1036892_100_MG_LVK_80_SE:_contig_38399	4865	6063	-	gspF	1-1200/1200	========/======	2025-01-01	99.92	97.08	vfdb	YP_404602	(gspF) general secretion pathway protein F [T2SS (VF0333)] [Shigella dysenteriae Sd197]
DTU_2024_1036892_100_MG_LVK_80_SE.metabat2.bin.175.fa	DTU_2024_1036892_100_MG_LVK_80_SE:_contig_38399	6063	7558	-	gspE	1-1494/1494	========/======	2025-02-02	100	96.66	vfdb	YP_404601	(gspE) general secretion pathway protein E [T2SS (VF0333)] [Shigella dysenteriae Sd197]
DTU_2024_1036892_100_MG_LVK_80_SE.metabat2.bin.175.fa	DTU_2024_1036892_100_MG_LVK_80_SE:_contig_38399	9743	10935	+	gspF	1-1200/1200	========/======	2025-11-08	99.25	94.84	vfdb	YP_404602	(gspF) general secretion pathway protein F [T2SS (VF0333)] [Shigella dysenteriae Sd197]
DTU_2024_1036892_100_MG_LVK_80_SE.metabat2.bin.175.fa	DTU_2024_1036892_100_MG_LVK_80_SE:_contig_38399	10976	11431	+	gspG	1-456/456	========/======	2025-02-02	99.78	95.84	vfdb	YP_404603	(gspG) general secretion pathway protein G [T2SS (VF0333)] [Shigella dysenteriae Sd197]
DTU_2024_1036892_100_MG_LVK_80_SE.metabat2.bin.175.fa	DTU_2024_1036892_100_MG_LVK_80_SE:_contig_38399	11472	12008	+	gspH	4-531/531	========/======	2025-09-06	99.44	92.18	vfdb	YP_404604	(gspH) general secretion pathway protein H [T2SS (VF0333)] [Shigella dysenteriae Sd197]
DTU_2024_1036892_100_MG_LVK_80_SE.metabat2.bin.175.fa	DTU_2024_1036892_100_MG_LVK_80_SE:_contig_38399	12005	12376	+	gspI	1-372/372	===============	0/0	100	95.16	vfdb	YP_404605	(gspI) general secretion pathway protein I [T2SS (VF0333)] [Shigella dysenteriae Sd197]
DTU_2024_1036892_100_MG_LVK_80_SE.metabat2.bin.175.fa	DTU_2024_1036892_100_MG_LVK_80_SE:_contig_38399	12409	12983	+	gspJ	1-570/570	========/======	2025-05-04	100	95.83	vfdb	YP_404606	(gspJ) general secretion pathway protein J [T2SS (VF0333)] [Shigella dysenteriae Sd197]
DTU_2024_1036892_100_MG_LVK_80_SE.metabat2.bin.175.fa	DTU_2024_1036892_100_MG_LVK_80_SE:_contig_38399	12980	13957	+	gspK	1-978/978	===============	0/0	100	97.65	vfdb	YP_404607	(gspK) general secretion pathway protein K [T2SS (VF0333)] [Shigella dysenteriae Sd197]
DTU_2024_1036892_100_MG_LVK_80_SE.metabat2.bin.175.fa	DTU_2024_1036892_100_MG_LVK_80_SE:_contig_38399	14272	15131	+	gspL	1-861/861	========/======	2025-01-01	99.88	96.75	vfdb	YP_404608	(gspL) general secretion pathway protein L [T2SS (VF0333)] [Shigella dysenteriae Sd197]
DTU_2024_1036892_100_MG_LVK_80_SE.metabat2.bin.175.fa	DTU_2024_1036892_100_MG_LVK_80_SE:_contig_38399	15247	15669	+	gspM	1-423/423	===============	0/0	100	94.8	vfdb	YP_404609	(gspM) general secretion pathway protein M [T2SS (VF0333)] [Shigella dysenteriae Sd197]
DTU_2024_1036892_100_MG_LVK_80_SE.metabat2.bin.175.fa	DTU_2024_1036892_100_MG_LVK_80_SE:_contig_4599	47034	48089	+	ompA	1-1041/1041	========/======	2015-04-01	100	94.89	vfdb	AAF37887	(ompA) outer membrane protein A [OmpA (VF0236)] [Escherichia coli O18:K1:H7 str. RS218]
DTU_2024_1036892_100_MG_LVK_80_SE.metabat2.bin.175.fa	DTU_2024_1036892_100_MG_LVK_80_SE:_contig_76796	11146	12574	-	aslA	1-1428/1428	========/======	2025-01-01	100	92.86	vfdb	AAG10151	(aslA) putative arylsulfatase [AslA (VF0238)] [Escherichia coli O18:K1:H7 str. RS218]
DTU_2024_1036892_100_MG_LVK_80_SE.metabat2.bin.175.fa	DTU_2024_1036892_100_MG_LVK_80_SE:_contig_76823	15589	16894	-	ybtS	1-1305/1305	========/======	2025-01-01	100	99.62	vfdb	NP_405477	(ybtS) salicylate synthase Irp9 [Yersiniabactin (VF0136)] [Yersinia pestis CO92]
DTU_2024_1036892_100_MG_LVK_80_SE.metabat2.bin.175.fa	DTU_2024_1036892_100_MG_LVK_80_SE:_contig_76823	16922	18215	-	ybtX	1-1281/1281	========/======	2015-09-01	99.92	98.22	vfdb	NP_405476	(ybtX) putative signal transducer [Yersiniabactin (VF0136)] [Yersinia pestis CO92]
DTU_2024_1036892_100_MG_LVK_80_SE.metabat2.bin.175.fa	DTU_2024_1036892_100_MG_LVK_80_SE:_contig_76823	18208	20011	-	ybtQ	1-1803/1803	========/======	2025-01-01	100	99.61	vfdb	NP_405475	(ybtQ) inner membrane ABC-transporter YbtQ [Yersiniabactin (VF0136)] [Yersinia pestis CO92]
DTU_2024_1036892_100_MG_LVK_80_SE.metabat2.bin.175.fa	DTU_2024_1036892_100_MG_LVK_80_SE:_contig_76823	19998	21806	-	ybtP	1-1803/1803	========/======	2025-06-01	100	99.17	vfdb	NP_405474	(ybtP) lipoprotein inner membrane ABC-transporter [Yersiniabactin (VF0136)] [Yersinia pestis CO92]
DTU_2024_1036892_100_MG_LVK_80_SE.metabat2.bin.175.fa	DTU_2024_1036892_100_MG_LVK_80_SE:_contig_76823	21973	22933	+	ybtA	1-960/960	========/======	2025-01-01	100	99.38	vfdb	NP_405473	(ybtA) transcriptional regulator YbtA [Yersiniabactin (VF0136)] [Yersinia pestis CO92]
DTU_2024_1036892_100_MG_LVK_80_SE.metabat2.bin.175.fa	DTU_2024_1036892_100_MG_LVK_80_SE:_contig_9208	103645	104391	-	entA	1-747/747	===============	0/0	100	95.72	vfdb	NP_752614	(entA) 23-dihydro-23-dihydroxybenzoate dehydrogenase [Enterobactin (VF0228)] [Escherichia coli CFT073]
DTU_2024_1036892_100_MG_LVK_80_SE.metabat2.bin.175.fa	DTU_2024_1036892_100_MG_LVK_80_SE:_contig_9208	104391	105248	-	entB	1-858/858	===============	0/0	100	98.14	vfdb	NP_752613	(entB) isochorismatase [Enterobactin (VF0228)] [Escherichia coli CFT073]
DTU_2024_1036892_100_MG_LVK_80_SE.metabat2.bin.175.fa	DTU_2024_1036892_100_MG_LVK_80_SE:_contig_9208	105262	106872	-	entE	1-1611/1611	===============	0/0	100	95.78	vfdb	NP_752612	(entE) 23-dihydroxybenzoate-AMP ligase component of enterobactin synthase multienzyme complex [Enterobactin (VF0228)] [Escherichia coli CFT073]
DTU_2024_1036892_100_MG_LVK_80_SE.metabat2.bin.175.fa	DTU_2024_1036892_100_MG_LVK_80_SE:_contig_9208	106882	108071	-	entC	1-1188/1188	========/======	2025-02-02	100	97.65	vfdb	NP_752611	(entC) isochorismate synthase 1 [Enterobactin (VF0228)] [Escherichia coli CFT073]
DTU_2024_1036892_100_MG_LVK_80_SE.metabat2.bin.175.fa	DTU_2024_1036892_100_MG_LVK_80_SE:_contig_9208	108434	109391	+	fepB	1-957/957	========/======	2025-01-01	100	98.12	vfdb	NP_752610	(fepB) ferrienterobactin ABC transporter periplasmic binding protein [Enterobactin (VF0228)] [Escherichia coli CFT073]
DTU_2024_1036892_100_MG_LVK_80_SE.metabat2.bin.175.fa	DTU_2024_1036892_100_MG_LVK_80_SE:_contig_9208	109395	110645	-	entS	1-1251/1251	===============	0/0	100	95.52	vfdb	NP_752609	(entS) enterobactin exporter iron-regulated [enterobactin (IA019)] [Escherichia coli CFT073]
DTU_2024_1036892_100_MG_LVK_80_SE.metabat2.bin.175.fa	DTU_2024_1036892_100_MG_LVK_80_SE:_contig_9208	110744	111760	+	fepD	1-1017/1017	===============	0/0	100	96.46	vfdb	NP_752608	(fepD) ferrienterobactin ABC transporter permease [Enterobactin (VF0228)] [Escherichia coli CFT073]
DTU_2024_1036892_100_MG_LVK_80_SE.metabat2.bin.175.fa	DTU_2024_1036892_100_MG_LVK_80_SE:_contig_9208	111757	112749	+	fepG	1-993/993	===============	0/0	100	94.56	vfdb	NP_752607	(fepG) iron-enterobactin ABC transporter permease [Enterobactin (VF0228)] [Escherichia coli CFT073]
DTU_2024_1036892_100_MG_LVK_80_SE.metabat2.bin.175.fa	DTU_2024_1036892_100_MG_LVK_80_SE:_contig_9208	112746	113561	+	fepC	1-816/816	===============	0/0	100	97.3	vfdb	NP_752606	(fepC) ferrienterobactin ABC transporter ATPase [Enterobactin (VF0228)] [Escherichia coli CFT073]
DTU_2024_1036892_100_MG_LVK_80_SE.metabat2.bin.175.fa	DTU_2024_1036892_100_MG_LVK_80_SE:_contig_9208	114935	118788	-	entF	1-3854/3882	===============	0/0	99.28	95.69	vfdb	NP_752604	(entF) enterobactin synthase multienzyme complex component ATP-dependent [Enterobactin (VF0228)] [Escherichia coli CFT073]
DTU_2024_1036893_100_MG_LVK_82_SE.metabat2.bin.124.fa	DTU_2024_1036893_100_MG_LVK_82_SE:_contig_17761	1	422	-	gspM	1-422/423	===============	0/0	99.76	93.6	vfdb	YP_404609	(gspM) general secretion pathway protein M [T2SS (VF0333)] [Shigella dysenteriae Sd197]
DTU_2024_1036893_100_MG_LVK_82_SE.metabat2.bin.124.fa	DTU_2024_1036893_100_MG_LVK_82_SE:_contig_17761	538	1398	-	gspL	1-861/861	===============	0/0	100	94.89	vfdb	YP_404608	(gspL) general secretion pathway protein L [T2SS (VF0333)] [Shigella dysenteriae Sd197]
DTU_2024_1036893_100_MG_LVK_82_SE.metabat2.bin.124.fa	DTU_2024_1036893_100_MG_LVK_82_SE:_contig_17761	1713	2690	-	gspK	1-978/978	===============	0/0	100	96.73	vfdb	YP_404607	(gspK) general secretion pathway protein K [T2SS (VF0333)] [Shigella dysenteriae Sd197]
DTU_2024_1036893_100_MG_LVK_82_SE.metabat2.bin.124.fa	DTU_2024_1036893_100_MG_LVK_82_SE:_contig_17761	2687	3256	-	gspJ	1-570/570	===============	0/0	100	94.91	vfdb	YP_404606	(gspJ) general secretion pathway protein J [T2SS (VF0333)] [Shigella dysenteriae Sd197]
DTU_2024_1036893_100_MG_LVK_82_SE.metabat2.bin.124.fa	DTU_2024_1036893_100_MG_LVK_82_SE:_contig_17761	3289	3660	-	gspI	1-372/372	===============	0/0	100	93.01	vfdb	YP_404605	(gspI) general secretion pathway protein I [T2SS (VF0333)] [Shigella dysenteriae Sd197]
DTU_2024_1036893_100_MG_LVK_82_SE.metabat2.bin.124.fa	DTU_2024_1036893_100_MG_LVK_82_SE:_contig_17761	3657	4187	-	gspH	1-531/531	===============	0/0	100	94.16	vfdb	YP_404604	(gspH) general secretion pathway protein H [T2SS (VF0333)] [Shigella dysenteriae Sd197]
DTU_2024_1036893_100_MG_LVK_82_SE.metabat2.bin.124.fa	DTU_2024_1036893_100_MG_LVK_82_SE:_contig_17761	4224	4679	-	gspG	1-456/456	===============	0/0	100	94.74	vfdb	YP_404603	(gspG) general secretion pathway protein G [T2SS (VF0333)] [Shigella dysenteriae Sd197]
DTU_2024_1036893_100_MG_LVK_82_SE.metabat2.bin.124.fa	DTU_2024_1036893_100_MG_LVK_82_SE:_contig_17761	4720	5919	-	gspF	1-1200/1200	===============	0/0	100	95.5	vfdb	YP_404602	(gspF) general secretion pathway protein F [T2SS (VF0333)] [Shigella dysenteriae Sd197]
DTU_2024_1036893_100_MG_LVK_82_SE.metabat2.bin.124.fa	DTU_2024_1036893_100_MG_LVK_82_SE:_contig_17761	5919	7412	-	gspE	1-1494/1494	===============	0/0	100	96.05	vfdb	YP_404601	(gspE) general secretion pathway protein E [T2SS (VF0333)] [Shigella dysenteriae Sd197]
DTU_2024_1036893_100_MG_LVK_82_SE.metabat2.bin.124.fa	DTU_2024_1036893_100_MG_LVK_82_SE:_contig_17761	7412	9262	-	gspD	1-1836/1836	========/======	2015-01-01	100	97.14	vfdb	YP_404600	(gspD) general secretion pathway protein D [T2SS (VF0333)] [Shigella dysenteriae Sd197]
DTU_2024_1036893_100_MG_LVK_82_SE.metabat2.bin.124.fa	DTU_2024_1036893_100_MG_LVK_82_SE:_contig_17761	9502	10332	-	gspC	1-831/831	===============	0/0	100	95.31	vfdb	YP_404599	(gspC) general secretion pathway protein C [T2SS (VF0333)] [Shigella dysenteriae Sd197]
DTU_2024_1036893_100_MG_LVK_82_SE.metabat2.bin.124.fa	DTU_2024_1036893_100_MG_LVK_82_SE:_contig_17767	164621	166042	+	espX1	1-1422/1422	===============	0/0	100	95.22	vfdb	NP_285716	(espX1) Type III secretion system effector EspX1 [LEE encoded T3SS (SS020)] [Escherichia coli O157:H7 str. EDL933]
DTU_2024_1036893_100_MG_LVK_82_SE.metabat2.bin.124.fa	DTU_2024_1036893_100_MG_LVK_82_SE:_contig_17767	277707	278618	-	fimH	1-912/912	===============	0/0	100	97.59	vfdb	NP_757248	(fimH) FimH protein precursor [Type 1 fimbriae (VF0221)] [Escherichia coli CFT073]
DTU_2024_1036893_100_MG_LVK_82_SE.metabat2.bin.124.fa	DTU_2024_1036893_100_MG_LVK_82_SE:_contig_17767	278629	279132	-	fimG	1-504/504	===============	0/0	100	97.42	vfdb	NP_757247	(fimG) FimG protein precursor [Type 1 fimbriae (VF0221)] [Escherichia coli CFT073]
DTU_2024_1036893_100_MG_LVK_82_SE.metabat2.bin.124.fa	DTU_2024_1036893_100_MG_LVK_82_SE:_contig_17767	279145	279678	-	fimF	1-534/534	===============	0/0	100	97.57	vfdb	NP_757245	(fimF) FimF protein precursor [Type 1 fimbriae (VF0221)] [Escherichia coli CFT073]
DTU_2024_1036893_100_MG_LVK_82_SE.metabat2.bin.124.fa	DTU_2024_1036893_100_MG_LVK_82_SE:_contig_17767	279685	282320	-	fimD	1-2637/2637	========/======	2025-01-01	99.96	98.37	vfdb	NP_757244	(fimD) Outer membrane usher protein fimD precursor [Type 1 fimbriae (VF0221)] [Escherichia coli CFT073]
DTU_2024_1036893_100_MG_LVK_82_SE.metabat2.bin.124.fa	DTU_2024_1036893_100_MG_LVK_82_SE:_contig_17767	282387	283112	-	fimC	1-726/726	===============	0/0	100	98.76	vfdb	NP_757243	(fimC) Chaperone protein fimC precursor [Type 1 fimbriae (VF0221)] [Escherichia coli CFT073]
DTU_2024_1036893_100_MG_LVK_82_SE.metabat2.bin.124.fa	DTU_2024_1036893_100_MG_LVK_82_SE:_contig_17767	283149	283688	-	fimI	1-540/540	===============	0/0	100	98.33	vfdb	NP_757242	(fimI) Fimbrin-like protein fimI precursor [Type 1 fimbriae (VF0221)] [Escherichia coli CFT073]
DTU_2024_1036893_100_MG_LVK_82_SE.metabat2.bin.124.fa	DTU_2024_1036893_100_MG_LVK_82_SE:_contig_17767	284791	285385	-	fimE	1-595/597	===============	0/0	99.66	99.33	vfdb	NP_757240	(fimE) Type 1 fimbriae Regulatory protein fimE [Type 1 fimbriae (VF0221)] [Escherichia coli CFT073]
DTU_2024_1036893_100_MG_LVK_82_SE.metabat2.bin.124.fa	DTU_2024_1036893_100_MG_LVK_82_SE:_contig_17767	285862	286464	-	fimB	1-603/603	===============	0/0	100	98.01	vfdb	NP_757239	(fimB) Type 1 fimbriae Regulatory protein fimB [Type 1 fimbriae (VF0221)] [Escherichia coli CFT073]
DTU_2024_1036893_100_MG_LVK_82_SE.metabat2.bin.124.fa	DTU_2024_1036893_100_MG_LVK_82_SE:_contig_17767	515834	517126	+	espX5	1-1293/1293	===============	0/0	100	97.14	vfdb	NP_290699	(espX5) Type III secretion system effector EspX5 [LEE encoded T3SS (SS020)] [Escherichia coli O157:H7 str. EDL933]
DTU_2024_1036893_100_MG_LVK_82_SE.metabat2.bin.124.fa	DTU_2024_1036893_100_MG_LVK_82_SE:_contig_17833	277341	281589	-	fdeC	1-4246/4251	========/======	2025-03-01	99.88	94.26	vfdb	YP_002390132	(fdeC) adhesin FdeC [FdeC (VF0506)] [Escherichia coli O45:K1:H7 str. S88]
DTU_2024_1036893_100_MG_LVK_82_SE.metabat2.bin.124.fa	DTU_2024_1036893_100_MG_LVK_82_SE:_contig_17833	284610	285200	+	ykgK/ecpR	1-591/591	===============	0/0	100	96.95	vfdb	NP_286011	(ykgK/ecpR) regulator protein EcpR [ECP (VF0404)] [Escherichia coli O157:H7 str. EDL933]
DTU_2024_1036893_100_MG_LVK_82_SE.metabat2.bin.124.fa	DTU_2024_1036893_100_MG_LVK_82_SE:_contig_17833	285275	285862	+	yagZ/ecpA	1-588/588	===============	0/0	100	99.15	vfdb	NP_286010	(yagZ/ecpA) E. coli common pilus structural subunit EcpA [ECP (VF0404)] [Escherichia coli O157:H7 str. EDL933]
DTU_2024_1036893_100_MG_LVK_82_SE.metabat2.bin.124.fa	DTU_2024_1036893_100_MG_LVK_82_SE:_contig_17833	285920	286588	+	yagY/ecpB	1-669/669	===============	0/0	100	98.21	vfdb	NP_286009	(yagY/ecpB) E. coli common pilus chaperone EcpB [ECP (VF0404)] [Escherichia coli O157:H7 str. EDL933]
DTU_2024_1036893_100_MG_LVK_82_SE.metabat2.bin.124.fa	DTU_2024_1036893_100_MG_LVK_82_SE:_contig_17833	286614	289139	+	yagX/ecpC	1-2526/2526	===============	0/0	100	98.77	vfdb	NP_286008	(yagX/ecpC) E. coli common pilus usher EcpC [ECP (VF0404)] [Escherichia coli O157:H7 str. EDL933]
DTU_2024_1036893_100_MG_LVK_82_SE.metabat2.bin.124.fa	DTU_2024_1036893_100_MG_LVK_82_SE:_contig_17833	289129	290772	+	yagW/ecpD	1-1644/1644	===============	0/0	100	99.03	vfdb	NP_286007	(yagW/ecpD) polymerized tip adhesin of ECP fibers [ECP (VF0404)] [Escherichia coli O157:H7 str. EDL933]
DTU_2024_1036893_100_MG_LVK_82_SE.metabat2.bin.124.fa	DTU_2024_1036893_100_MG_LVK_82_SE:_contig_17833	290696	291449	+	yagV/ecpE	1-754/756	===============	0/0	99.74	96.95	vfdb	NP_286006	(yagV/ecpE) E. coli common pilus chaperone EcpE [ECP (VF0404)] [Escherichia coli O157:H7 str. EDL933]
DTU_2024_1036893_100_MG_LVK_82_SE.metabat2.bin.124.fa	DTU_2024_1036893_100_MG_LVK_82_SE:_contig_17865	295470	296510	-	ompA	1-1041/1041	===============	0/0	100	97.98	vfdb	AAF37887	(ompA) outer membrane protein A [OmpA (VF0236)] [Escherichia coli O18:K1:H7 str. RS218]
DTU_2024_1036893_100_MG_LVK_82_SE.metabat2.bin.124.fa	DTU_2024_1036893_100_MG_LVK_82_SE:_contig_5773	316389	318288	+	espL1	1-1899/1899	========/======	2025-01-01	100	97.53	vfdb	NP_288154	(espL1) Type III secretion system effector espL1 [LEE encoded T3SS (SS020)] [Escherichia coli O157:H7 str. EDL933]
DTU_2024_1036893_100_MG_LVK_82_SE.metabat2.bin.124.fa	DTU_2024_1036893_100_MG_LVK_82_SE:_contig_70899	15241	16011	-	entD	1-771/771	===============	0/0	100	95.07	vfdb	NP_752599	(entD) phosphopantetheinyl transferase component of enterobactin synthase multienzyme complex [Enterobactin (VF0228)] [Escherichia coli CFT073]
DTU_2024_1036893_100_MG_LVK_82_SE.metabat2.bin.124.fa	DTU_2024_1036893_100_MG_LVK_82_SE:_contig_70899	16036	18276	-	fepA	1-2241/2241	===============	0/0	100	96.74	vfdb	NP_752600	(fepA) ferrienterobactin outer membrane transporter [Enterobactin (VF0228)] [Escherichia coli CFT073]
DTU_2024_1036893_100_MG_LVK_82_SE.metabat2.bin.124.fa	DTU_2024_1036893_100_MG_LVK_82_SE:_contig_70899	18519	19721	+	fes	1-1203/1203	===============	0/0	100	96.67	vfdb	NP_752602	(fes) enterobactin/ferric enterobactin esterase [enterobactin (IA019)] [Escherichia coli CFT073]
DTU_2024_1036893_100_MG_LVK_82_SE.metabat2.bin.124.fa	DTU_2024_1036893_100_MG_LVK_82_SE:_contig_70899	19939	23794	+	entF	1-3854/3882	========/======	2025-02-02	99.28	95.72	vfdb	NP_752604	(entF) enterobactin synthase multienzyme complex component ATP-dependent [Enterobactin (VF0228)] [Escherichia coli CFT073]
DTU_2024_1036893_100_MG_LVK_82_SE.metabat2.bin.124.fa	DTU_2024_1036893_100_MG_LVK_82_SE:_contig_70899	25169	25984	-	fepC	1-816/816	===============	0/0	100	97.3	vfdb	NP_752606	(fepC) ferrienterobactin ABC transporter ATPase [Enterobactin (VF0228)] [Escherichia coli CFT073]
DTU_2024_1036893_100_MG_LVK_82_SE.metabat2.bin.124.fa	DTU_2024_1036893_100_MG_LVK_82_SE:_contig_70899	25981	26973	-	fepG	1-993/993	===============	0/0	100	94.06	vfdb	NP_752607	(fepG) iron-enterobactin ABC transporter permease [Enterobactin (VF0228)] [Escherichia coli CFT073]
DTU_2024_1036893_100_MG_LVK_82_SE.metabat2.bin.124.fa	DTU_2024_1036893_100_MG_LVK_82_SE:_contig_70899	26970	27986	-	fepD	1-1017/1017	===============	0/0	100	96.07	vfdb	NP_752608	(fepD) ferrienterobactin ABC transporter permease [Enterobactin (VF0228)] [Escherichia coli CFT073]
DTU_2024_1036893_100_MG_LVK_82_SE.metabat2.bin.124.fa	DTU_2024_1036893_100_MG_LVK_82_SE:_contig_70899	28085	29335	+	entS	1-1251/1251	===============	0/0	100	95.44	vfdb	NP_752609	(entS) enterobactin exporter iron-regulated [enterobactin (IA019)] [Escherichia coli CFT073]
DTU_2024_1036893_100_MG_LVK_82_SE.metabat2.bin.124.fa	DTU_2024_1036893_100_MG_LVK_82_SE:_contig_70899	29339	30295	-	fepB	1-957/957	===============	0/0	100	97.49	vfdb	NP_752610	(fepB) ferrienterobactin ABC transporter periplasmic binding protein [Enterobactin (VF0228)] [Escherichia coli CFT073]
DTU_2024_1036893_100_MG_LVK_82_SE.metabat2.bin.124.fa	DTU_2024_1036893_100_MG_LVK_82_SE:_contig_70899	30658	31845	+	entC	1-1188/1188	===============	0/0	100	97.9	vfdb	NP_752611	(entC) isochorismate synthase 1 [Enterobactin (VF0228)] [Escherichia coli CFT073]
DTU_2024_1036893_100_MG_LVK_82_SE.metabat2.bin.124.fa	DTU_2024_1036893_100_MG_LVK_82_SE:_contig_70899	31855	33465	+	entE	1-1611/1611	===============	0/0	100	95.41	vfdb	NP_752612	(entE) 23-dihydroxybenzoate-AMP ligase component of enterobactin synthase multienzyme complex [Enterobactin (VF0228)] [Escherichia coli CFT073]
DTU_2024_1036893_100_MG_LVK_82_SE.metabat2.bin.124.fa	DTU_2024_1036893_100_MG_LVK_82_SE:_contig_70899	33479	34336	+	entB	1-858/858	===============	0/0	100	98.14	vfdb	NP_752613	(entB) isochorismatase [Enterobactin (VF0228)] [Escherichia coli CFT073]
DTU_2024_1036893_100_MG_LVK_82_SE.metabat2.bin.124.fa	DTU_2024_1036893_100_MG_LVK_82_SE:_contig_70899	34336	35082	+	entA	1-747/747	===============	0/0	100	95.58	vfdb	NP_752614	(entA) 23-dihydro-23-dihydroxybenzoate dehydrogenase [Enterobactin (VF0228)] [Escherichia coli CFT073]
DTU_2024_1036894_100_MG_LVK_83_SE.metabat2.bin.299.fa	DTU_2024_1036894_100_MG_LVK_83_SE:_contig_11977	1241	2662	-	espX1	1-1422/1422	===============	0/0	100	95.22	vfdb	NP_285716	(espX1) Type III secretion system effector EspX1 [LEE encoded T3SS (SS020)] [Escherichia coli O157:H7 str. EDL933]
DTU_2024_1036894_100_MG_LVK_83_SE.metabat2.bin.299.fa	DTU_2024_1036894_100_MG_LVK_83_SE:_contig_1965	551028	551450	-	gspM	1-423/423	===============	0/0	100	94.56	vfdb	YP_404609	(gspM) general secretion pathway protein M [T2SS (VF0333)] [Shigella dysenteriae Sd197]
DTU_2024_1036894_100_MG_LVK_83_SE.metabat2.bin.299.fa	DTU_2024_1036894_100_MG_LVK_83_SE:_contig_1965	551566	552426	-	gspL	1-861/861	===============	0/0	100	97.79	vfdb	YP_404608	(gspL) general secretion pathway protein L [T2SS (VF0333)] [Shigella dysenteriae Sd197]
DTU_2024_1036894_100_MG_LVK_83_SE.metabat2.bin.299.fa	DTU_2024_1036894_100_MG_LVK_83_SE:_contig_1965	552741	553718	-	gspK	1-978/978	===============	0/0	100	96.42	vfdb	YP_404607	(gspK) general secretion pathway protein K [T2SS (VF0333)] [Shigella dysenteriae Sd197]
DTU_2024_1036894_100_MG_LVK_83_SE.metabat2.bin.299.fa	DTU_2024_1036894_100_MG_LVK_83_SE:_contig_1965	553715	554284	-	gspJ	1-570/570	===============	0/0	100	97.19	vfdb	YP_404606	(gspJ) general secretion pathway protein J [T2SS (VF0333)] [Shigella dysenteriae Sd197]
DTU_2024_1036894_100_MG_LVK_83_SE.metabat2.bin.299.fa	DTU_2024_1036894_100_MG_LVK_83_SE:_contig_1965	554317	554688	-	gspI	1-372/372	===============	0/0	100	94.89	vfdb	YP_404605	(gspI) general secretion pathway protein I [T2SS (VF0333)] [Shigella dysenteriae Sd197]
DTU_2024_1036894_100_MG_LVK_83_SE.metabat2.bin.299.fa	DTU_2024_1036894_100_MG_LVK_83_SE:_contig_1965	554685	555215	-	gspH	1-531/531	===============	0/0	100	95.1	vfdb	YP_404604	(gspH) general secretion pathway protein H [T2SS (VF0333)] [Shigella dysenteriae Sd197]
DTU_2024_1036894_100_MG_LVK_83_SE.metabat2.bin.299.fa	DTU_2024_1036894_100_MG_LVK_83_SE:_contig_1965	555252	555707	-	gspG	1-456/456	===============	0/0	100	95.61	vfdb	YP_404603	(gspG) general secretion pathway protein G [T2SS (VF0333)] [Shigella dysenteriae Sd197]
DTU_2024_1036894_100_MG_LVK_83_SE.metabat2.bin.299.fa	DTU_2024_1036894_100_MG_LVK_83_SE:_contig_1965	555748	556947	-	gspF	1-1200/1200	===============	0/0	100	96.83	vfdb	YP_404602	(gspF) general secretion pathway protein F [T2SS (VF0333)] [Shigella dysenteriae Sd197]
DTU_2024_1036894_100_MG_LVK_83_SE.metabat2.bin.299.fa	DTU_2024_1036894_100_MG_LVK_83_SE:_contig_1965	556947	558440	-	gspE	1-1494/1494	===============	0/0	100	96.19	vfdb	YP_404601	(gspE) general secretion pathway protein E [T2SS (VF0333)] [Shigella dysenteriae Sd197]
DTU_2024_1036894_100_MG_LVK_83_SE.metabat2.bin.299.fa	DTU_2024_1036894_100_MG_LVK_83_SE:_contig_1965	558440	560290	-	gspD	1-1836/1836	========/======	2015-01-01	100	97.73	vfdb	YP_404600	(gspD) general secretion pathway protein D [T2SS (VF0333)] [Shigella dysenteriae Sd197]
DTU_2024_1036894_100_MG_LVK_83_SE.metabat2.bin.299.fa	DTU_2024_1036894_100_MG_LVK_83_SE:_contig_1965	560530	561360	-	gspC	1-831/831	===============	0/0	100	95.31	vfdb	YP_404599	(gspC) general secretion pathway protein C [T2SS (VF0333)] [Shigella dysenteriae Sd197]
DTU_2024_1036894_100_MG_LVK_83_SE.metabat2.bin.299.fa	DTU_2024_1036894_100_MG_LVK_83_SE:_contig_1965	580224	580340	-	astA	1-117/117	===============	0/0	100	100	vfdb	BAA94855	(astA) heat-stable enterotoxin 1 [EAST1 (VF0216)] [Escherichia coli O44:H18 042]
DTU_2024_1036894_100_MG_LVK_83_SE.metabat2.bin.299.fa	DTU_2024_1036894_100_MG_LVK_83_SE:_contig_1965	711972	712802	+	gspC	1-831/831	===============	0/0	100	95.31	vfdb	YP_404599	(gspC) general secretion pathway protein C [T2SS (VF0333)] [Shigella dysenteriae Sd197]
DTU_2024_1036894_100_MG_LVK_83_SE.metabat2.bin.299.fa	DTU_2024_1036894_100_MG_LVK_83_SE:_contig_1965	713042	714892	+	gspD	1-1836/1836	========/======	2015-01-01	100	97.14	vfdb	YP_404600	(gspD) general secretion pathway protein D [T2SS (VF0333)] [Shigella dysenteriae Sd197]
DTU_2024_1036894_100_MG_LVK_83_SE.metabat2.bin.299.fa	DTU_2024_1036894_100_MG_LVK_83_SE:_contig_1965	714892	716385	+	gspE	1-1494/1494	===============	0/0	100	96.05	vfdb	YP_404601	(gspE) general secretion pathway protein E [T2SS (VF0333)] [Shigella dysenteriae Sd197]
DTU_2024_1036894_100_MG_LVK_83_SE.metabat2.bin.299.fa	DTU_2024_1036894_100_MG_LVK_83_SE:_contig_1965	716385	717584	+	gspF	1-1200/1200	===============	0/0	100	95.5	vfdb	YP_404602	(gspF) general secretion pathway protein F [T2SS (VF0333)] [Shigella dysenteriae Sd197]
DTU_2024_1036894_100_MG_LVK_83_SE.metabat2.bin.299.fa	DTU_2024_1036894_100_MG_LVK_83_SE:_contig_1965	717625	718080	+	gspG	1-456/456	===============	0/0	100	94.74	vfdb	YP_404603	(gspG) general secretion pathway protein G [T2SS (VF0333)] [Shigella dysenteriae Sd197]
DTU_2024_1036894_100_MG_LVK_83_SE.metabat2.bin.299.fa	DTU_2024_1036894_100_MG_LVK_83_SE:_contig_1965	718117	718647	+	gspH	1-531/531	===============	0/0	100	94.16	vfdb	YP_404604	(gspH) general secretion pathway protein H [T2SS (VF0333)] [Shigella dysenteriae Sd197]
DTU_2024_1036894_100_MG_LVK_83_SE.metabat2.bin.299.fa	DTU_2024_1036894_100_MG_LVK_83_SE:_contig_1965	718644	719015	+	gspI	1-372/372	===============	0/0	100	93.01	vfdb	YP_404605	(gspI) general secretion pathway protein I [T2SS (VF0333)] [Shigella dysenteriae Sd197]
DTU_2024_1036894_100_MG_LVK_83_SE.metabat2.bin.299.fa	DTU_2024_1036894_100_MG_LVK_83_SE:_contig_1965	719048	719617	+	gspJ	1-570/570	===============	0/0	100	94.91	vfdb	YP_404606	(gspJ) general secretion pathway protein J [T2SS (VF0333)] [Shigella dysenteriae Sd197]
DTU_2024_1036894_100_MG_LVK_83_SE.metabat2.bin.299.fa	DTU_2024_1036894_100_MG_LVK_83_SE:_contig_1965	719614	720591	+	gspK	1-978/978	===============	0/0	100	96.73	vfdb	YP_404607	(gspK) general secretion pathway protein K [T2SS (VF0333)] [Shigella dysenteriae Sd197]
DTU_2024_1036894_100_MG_LVK_83_SE.metabat2.bin.299.fa	DTU_2024_1036894_100_MG_LVK_83_SE:_contig_1965	720906	721766	+	gspL	1-861/861	===============	0/0	100	94.89	vfdb	YP_404608	(gspL) general secretion pathway protein L [T2SS (VF0333)] [Shigella dysenteriae Sd197]
DTU_2024_1036894_100_MG_LVK_83_SE.metabat2.bin.299.fa	DTU_2024_1036894_100_MG_LVK_83_SE:_contig_1965	721882	722303	+	gspM	1-422/423	===============	0/0	99.76	93.6	vfdb	YP_404609	(gspM) general secretion pathway protein M [T2SS (VF0333)] [Shigella dysenteriae Sd197]
DTU_2024_1036894_100_MG_LVK_83_SE.metabat2.bin.299.fa	DTU_2024_1036894_100_MG_LVK_83_SE:_contig_2457	47952	48068	-	astA	1-117/117	===============	0/0	100	95.73	vfdb	BAA94855	(astA) heat-stable enterotoxin 1 [EAST1 (VF0216)] [Escherichia coli O44:H18 042]
DTU_2024_1036894_100_MG_LVK_83_SE.metabat2.bin.299.fa	DTU_2024_1036894_100_MG_LVK_83_SE:_contig_2457	212166	213594	-	aslA	1-1428/1428	========/======	2025-01-01	100	92.86	vfdb	AAG10151	(aslA) putative arylsulfatase [AslA (VF0238)] [Escherichia coli O18:K1:H7 str. RS218]
DTU_2024_1036894_100_MG_LVK_83_SE.metabat2.bin.299.fa	DTU_2024_1036894_100_MG_LVK_83_SE:_contig_2457	448566	450752	-	espL4	1-2187/2187	===============	0/0	100	97.39	vfdb	NP_290644	(espL4) Type III secretion system effector EspL4 [LEE encoded T3SS (SS020)] [Escherichia coli O157:H7 str. EDL933]
DTU_2024_1036894_100_MG_LVK_83_SE.metabat2.bin.299.fa	DTU_2024_1036894_100_MG_LVK_83_SE:_contig_2457	479221	480801	+	espX4	1-1581/1581	===============	0/0	100	96.39	vfdb	NP_290672	(espX4) Type III secretion system effector EspX4 [LEE encoded T3SS (SS020)] [Escherichia coli O157:H7 str. EDL933]
DTU_2024_1036894_100_MG_LVK_83_SE.metabat2.bin.299.fa	DTU_2024_1036894_100_MG_LVK_83_SE:_contig_2457	510306	511598	-	espX5	1-1293/1293	===============	0/0	100	97.14	vfdb	NP_290699	(espX5) Type III secretion system effector EspX5 [LEE encoded T3SS (SS020)] [Escherichia coli O157:H7 str. EDL933]
DTU_2024_1036894_100_MG_LVK_83_SE.metabat2.bin.299.fa	DTU_2024_1036894_100_MG_LVK_83_SE:_contig_2457	761704	762306	+	fimB	1-603/603	===============	0/0	100	98.01	vfdb	NP_757239	(fimB) Type 1 fimbriae Regulatory protein fimB [Type 1 fimbriae (VF0221)] [Escherichia coli CFT073]
DTU_2024_1036894_100_MG_LVK_83_SE.metabat2.bin.299.fa	DTU_2024_1036894_100_MG_LVK_83_SE:_contig_2457	762783	763377	+	fimE	1-595/597	===============	0/0	99.66	99.33	vfdb	NP_757240	(fimE) Type 1 fimbriae Regulatory protein fimE [Type 1 fimbriae (VF0221)] [Escherichia coli CFT073]
DTU_2024_1036894_100_MG_LVK_83_SE.metabat2.bin.299.fa	DTU_2024_1036894_100_MG_LVK_83_SE:_contig_2457	764480	765019	+	fimI	1-540/540	===============	0/0	100	98.33	vfdb	NP_757242	(fimI) Fimbrin-like protein fimI precursor [Type 1 fimbriae (VF0221)] [Escherichia coli CFT073]
DTU_2024_1036894_100_MG_LVK_83_SE.metabat2.bin.299.fa	DTU_2024_1036894_100_MG_LVK_83_SE:_contig_2457	765056	765781	+	fimC	1-726/726	===============	0/0	100	98.76	vfdb	NP_757243	(fimC) Chaperone protein fimC precursor [Type 1 fimbriae (VF0221)] [Escherichia coli CFT073]
DTU_2024_1036894_100_MG_LVK_83_SE.metabat2.bin.299.fa	DTU_2024_1036894_100_MG_LVK_83_SE:_contig_2457	765848	768483	+	fimD	1-2637/2637	========/======	2025-01-01	99.96	98.37	vfdb	NP_757244	(fimD) Outer membrane usher protein fimD precursor [Type 1 fimbriae (VF0221)] [Escherichia coli CFT073]
DTU_2024_1036894_100_MG_LVK_83_SE.metabat2.bin.299.fa	DTU_2024_1036894_100_MG_LVK_83_SE:_contig_2457	768490	769023	+	fimF	1-534/534	===============	0/0	100	97.57	vfdb	NP_757245	(fimF) FimF protein precursor [Type 1 fimbriae (VF0221)] [Escherichia coli CFT073]
DTU_2024_1036894_100_MG_LVK_83_SE.metabat2.bin.299.fa	DTU_2024_1036894_100_MG_LVK_83_SE:_contig_2457	769036	769539	+	fimG	1-504/504	===============	0/0	100	97.42	vfdb	NP_757247	(fimG) FimG protein precursor [Type 1 fimbriae (VF0221)] [Escherichia coli CFT073]
DTU_2024_1036894_100_MG_LVK_83_SE.metabat2.bin.299.fa	DTU_2024_1036894_100_MG_LVK_83_SE:_contig_2457	769550	770461	+	fimH	1-912/912	===============	0/0	100	97.48	vfdb	NP_757248	(fimH) FimH protein precursor [Type 1 fimbriae (VF0221)] [Escherichia coli CFT073]
DTU_2024_1036894_100_MG_LVK_83_SE.metabat2.bin.299.fa	DTU_2024_1036894_100_MG_LVK_83_SE:_contig_2459	271883	276131	-	fdeC	1-4246/4251	========/======	2025-03-01	99.88	94.26	vfdb	YP_002390132	(fdeC) adhesin FdeC [FdeC (VF0506)] [Escherichia coli O45:K1:H7 str. S88]
DTU_2024_1036894_100_MG_LVK_83_SE.metabat2.bin.299.fa	DTU_2024_1036894_100_MG_LVK_83_SE:_contig_2459	279152	279742	+	ykgK/ecpR	1-591/591	===============	0/0	100	96.95	vfdb	NP_286011	(ykgK/ecpR) regulator protein EcpR [ECP (VF0404)] [Escherichia coli O157:H7 str. EDL933]
DTU_2024_1036894_100_MG_LVK_83_SE.metabat2.bin.299.fa	DTU_2024_1036894_100_MG_LVK_83_SE:_contig_2459	279817	280404	+	yagZ/ecpA	1-588/588	===============	0/0	100	99.15	vfdb	NP_286010	(yagZ/ecpA) E. coli common pilus structural subunit EcpA [ECP (VF0404)] [Escherichia coli O157:H7 str. EDL933]
DTU_2024_1036894_100_MG_LVK_83_SE.metabat2.bin.299.fa	DTU_2024_1036894_100_MG_LVK_83_SE:_contig_2459	280462	281130	+	yagY/ecpB	1-669/669	===============	0/0	100	98.06	vfdb	NP_286009	(yagY/ecpB) E. coli common pilus chaperone EcpB [ECP (VF0404)] [Escherichia coli O157:H7 str. EDL933]
DTU_2024_1036894_100_MG_LVK_83_SE.metabat2.bin.299.fa	DTU_2024_1036894_100_MG_LVK_83_SE:_contig_2459	281156	283681	+	yagX/ecpC	1-2526/2526	===============	0/0	100	98.69	vfdb	NP_286008	(yagX/ecpC) E. coli common pilus usher EcpC [ECP (VF0404)] [Escherichia coli O157:H7 str. EDL933]
DTU_2024_1036894_100_MG_LVK_83_SE.metabat2.bin.299.fa	DTU_2024_1036894_100_MG_LVK_83_SE:_contig_2459	283671	285314	+	yagW/ecpD	1-1644/1644	===============	0/0	100	99.03	vfdb	NP_286007	(yagW/ecpD) polymerized tip adhesin of ECP fibers [ECP (VF0404)] [Escherichia coli O157:H7 str. EDL933]
DTU_2024_1036894_100_MG_LVK_83_SE.metabat2.bin.299.fa	DTU_2024_1036894_100_MG_LVK_83_SE:_contig_2459	285238	285991	+	yagV/ecpE	1-754/756	===============	0/0	99.74	96.95	vfdb	NP_286006	(yagV/ecpE) E. coli common pilus chaperone EcpE [ECP (VF0404)] [Escherichia coli O157:H7 str. EDL933]
DTU_2024_1036894_100_MG_LVK_83_SE.metabat2.bin.299.fa	DTU_2024_1036894_100_MG_LVK_83_SE:_contig_2461	110	880	-	entD	1-771/771	===============	0/0	100	95.2	vfdb	NP_752599	(entD) phosphopantetheinyl transferase component of enterobactin synthase multienzyme complex [Enterobactin (VF0228)] [Escherichia coli CFT073]
DTU_2024_1036894_100_MG_LVK_83_SE.metabat2.bin.299.fa	DTU_2024_1036894_100_MG_LVK_83_SE:_contig_2461	905	3145	-	fepA	1-2241/2241	===============	0/0	100	96.74	vfdb	NP_752600	(fepA) ferrienterobactin outer membrane transporter [Enterobactin (VF0228)] [Escherichia coli CFT073]
DTU_2024_1036894_100_MG_LVK_83_SE.metabat2.bin.299.fa	DTU_2024_1036894_100_MG_LVK_83_SE:_contig_2461	3388	4590	+	fes	1-1203/1203	===============	0/0	100	96.67	vfdb	NP_752602	(fes) enterobactin/ferric enterobactin esterase [enterobactin (IA019)] [Escherichia coli CFT073]
DTU_2024_1036894_100_MG_LVK_83_SE.metabat2.bin.299.fa	DTU_2024_1036894_100_MG_LVK_83_SE:_contig_2461	4808	8661	+	entF	1-3854/3882	===============	0/0	99.28	95.69	vfdb	NP_752604	(entF) enterobactin synthase multienzyme complex component ATP-dependent [Enterobactin (VF0228)] [Escherichia coli CFT073]
DTU_2024_1036894_100_MG_LVK_83_SE.metabat2.bin.299.fa	DTU_2024_1036894_100_MG_LVK_83_SE:_contig_2461	10035	10850	-	fepC	1-816/816	===============	0/0	100	97.3	vfdb	NP_752606	(fepC) ferrienterobactin ABC transporter ATPase [Enterobactin (VF0228)] [Escherichia coli CFT073]
DTU_2024_1036894_100_MG_LVK_83_SE.metabat2.bin.299.fa	DTU_2024_1036894_100_MG_LVK_83_SE:_contig_2461	10847	11839	-	fepG	1-993/993	===============	0/0	100	94.06	vfdb	NP_752607	(fepG) iron-enterobactin ABC transporter permease [Enterobactin (VF0228)] [Escherichia coli CFT073]
DTU_2024_1036894_100_MG_LVK_83_SE.metabat2.bin.299.fa	DTU_2024_1036894_100_MG_LVK_83_SE:_contig_2461	11836	12852	-	fepD	1-1017/1017	===============	0/0	100	96.07	vfdb	NP_752608	(fepD) ferrienterobactin ABC transporter permease [Enterobactin (VF0228)] [Escherichia coli CFT073]
DTU_2024_1036894_100_MG_LVK_83_SE.metabat2.bin.299.fa	DTU_2024_1036894_100_MG_LVK_83_SE:_contig_2461	12951	14201	+	entS	1-1251/1251	===============	0/0	100	95.44	vfdb	NP_752609	(entS) enterobactin exporter iron-regulated [enterobactin (IA019)] [Escherichia coli CFT073]
DTU_2024_1036894_100_MG_LVK_83_SE.metabat2.bin.299.fa	DTU_2024_1036894_100_MG_LVK_83_SE:_contig_2461	14205	15161	-	fepB	1-957/957	===============	0/0	100	97.49	vfdb	NP_752610	(fepB) ferrienterobactin ABC transporter periplasmic binding protein [Enterobactin (VF0228)] [Escherichia coli CFT073]
DTU_2024_1036894_100_MG_LVK_83_SE.metabat2.bin.299.fa	DTU_2024_1036894_100_MG_LVK_83_SE:_contig_2461	15524	16711	+	entC	1-1188/1188	===============	0/0	100	97.81	vfdb	NP_752611	(entC) isochorismate synthase 1 [Enterobactin (VF0228)] [Escherichia coli CFT073]
DTU_2024_1036894_100_MG_LVK_83_SE.metabat2.bin.299.fa	DTU_2024_1036894_100_MG_LVK_83_SE:_contig_2461	16721	18331	+	entE	1-1611/1611	===============	0/0	100	95.34	vfdb	NP_752612	(entE) 23-dihydroxybenzoate-AMP ligase component of enterobactin synthase multienzyme complex [Enterobactin (VF0228)] [Escherichia coli CFT073]
DTU_2024_1036894_100_MG_LVK_83_SE.metabat2.bin.299.fa	DTU_2024_1036894_100_MG_LVK_83_SE:_contig_2461	18345	19202	+	entB	1-858/858	===============	0/0	100	98.14	vfdb	NP_752613	(entB) isochorismatase [Enterobactin (VF0228)] [Escherichia coli CFT073]
DTU_2024_1036894_100_MG_LVK_83_SE.metabat2.bin.299.fa	DTU_2024_1036894_100_MG_LVK_83_SE:_contig_2461	19202	19948	+	entA	1-747/747	===============	0/0	100	95.58	vfdb	NP_752614	(entA) 23-dihydro-23-dihydroxybenzoate dehydrogenase [Enterobactin (VF0228)] [Escherichia coli CFT073]
DTU_2024_1036894_100_MG_LVK_83_SE.metabat2.bin.299.fa	DTU_2024_1036894_100_MG_LVK_83_SE:_contig_2461	404216	405256	-	ompA	1-1041/1041	===============	0/0	100	97.98	vfdb	AAF37887	(ompA) outer membrane protein A [OmpA (VF0236)] [Escherichia coli O18:K1:H7 str. RS218]
DTU_2024_1036894_100_MG_LVK_83_SE.metabat2.bin.299.fa	DTU_2024_1036894_100_MG_LVK_83_SE:_contig_2461	1338186	1340085	+	espL1	1-1899/1899	========/======	2025-01-01	100	97.53	vfdb	NP_288154	(espL1) Type III secretion system effector espL1 [LEE encoded T3SS (SS020)] [Escherichia coli O157:H7 str. EDL933]
DTU_2024_1036895_100_MG_LVK_88_SE.metabat2.bin.182.fa	DTU_2024_1036895_100_MG_LVK_88_SE:_contig_1331	123547	124975	+	aslA	1-1428/1428	========/======	2025-01-01	100	93.56	vfdb	AAG10151	(aslA) putative arylsulfatase [AslA (VF0238)] [Escherichia coli O18:K1:H7 str. RS218]
DTU_2024_1036895_100_MG_LVK_88_SE.metabat2.bin.182.fa	DTU_2024_1036895_100_MG_LVK_88_SE:_contig_13338	4621	6203	+	espX4	1-1581/1581	========/======	2025-04-04	99.94	93.12	vfdb	NP_290672	(espX4) Type III secretion system effector EspX4 [LEE encoded T3SS (SS020)] [Escherichia coli O157:H7 str. EDL933]
DTU_2024_1036895_100_MG_LVK_88_SE.metabat2.bin.182.fa	DTU_2024_1036895_100_MG_LVK_88_SE:_contig_31663	11355	12108	-	yagV/ecpE	1-754/756	===============	0/0	99.74	97.08	vfdb	NP_286006	(yagV/ecpE) E. coli common pilus chaperone EcpE [ECP (VF0404)] [Escherichia coli O157:H7 str. EDL933]
DTU_2024_1036895_100_MG_LVK_88_SE.metabat2.bin.182.fa	DTU_2024_1036895_100_MG_LVK_88_SE:_contig_31663	12032	13675	-	yagW/ecpD	1-1644/1644	===============	0/0	100	99.09	vfdb	NP_286007	(yagW/ecpD) polymerized tip adhesin of ECP fibers [ECP (VF0404)] [Escherichia coli O157:H7 str. EDL933]
DTU_2024_1036895_100_MG_LVK_88_SE.metabat2.bin.182.fa	DTU_2024_1036895_100_MG_LVK_88_SE:_contig_45032	6517	8416	-	espL1	1-1899/1899	========/======	2025-01-01	100	97.58	vfdb	NP_288154	(espL1) Type III secretion system effector espL1 [LEE encoded T3SS (SS020)] [Escherichia coli O157:H7 str. EDL933]
DTU_2024_1036895_100_MG_LVK_88_SE.metabat2.bin.182.fa	DTU_2024_1036895_100_MG_LVK_88_SE:_contig_45351	22402	23442	-	ompA	1-1041/1041	===============	0/0	100	97.98	vfdb	AAF37887	(ompA) outer membrane protein A [OmpA (VF0236)] [Escherichia coli O18:K1:H7 str. RS218]
DTU_2024_1036895_100_MG_LVK_88_SE.metabat2.bin.182.fa	DTU_2024_1036895_100_MG_LVK_88_SE:_contig_45739	5102	6394	-	espX5	1-1293/1293	===============	0/0	100	97.14	vfdb	NP_290699	(espX5) Type III secretion system effector EspX5 [LEE encoded T3SS (SS020)] [Escherichia coli O157:H7 str. EDL933]
DTU_2024_1036895_100_MG_LVK_88_SE.metabat2.bin.182.fa	DTU_2024_1036895_100_MG_LVK_88_SE:_contig_46740	7653	9839	-	espL4	1-2187/2187	===============	0/0	100	97.3	vfdb	NP_290644	(espL4) Type III secretion system effector EspL4 [LEE encoded T3SS (SS020)] [Escherichia coli O157:H7 str. EDL933]
DTU_2024_1036895_100_MG_LVK_88_SE.metabat2.bin.182.fa	DTU_2024_1036895_100_MG_LVK_88_SE:_contig_49616	26874	31127	-	fdeC	1-4246/4251	========/======	2025-08-05	99.88	93.94	vfdb	YP_002390132	(fdeC) adhesin FdeC [FdeC (VF0506)] [Escherichia coli O45:K1:H7 str. S88]
DTU_2024_1036895_100_MG_LVK_88_SE.metabat2.bin.182.fa	DTU_2024_1036895_100_MG_LVK_88_SE:_contig_56740	3	680	-	entA	1-677/747	========/=====.	2025-01-01	90.63	95.13	vfdb	NP_752614	(entA) 23-dihydro-23-dihydroxybenzoate dehydrogenase [Enterobactin (VF0228)] [Escherichia coli CFT073]
DTU_2024_1036895_100_MG_LVK_88_SE.metabat2.bin.182.fa	DTU_2024_1036895_100_MG_LVK_88_SE:_contig_56740	680	1538	-	entB	1-858/858	========/======	2025-01-01	100	98.02	vfdb	NP_752613	(entB) isochorismatase [Enterobactin (VF0228)] [Escherichia coli CFT073]
DTU_2024_1036895_100_MG_LVK_88_SE.metabat2.bin.182.fa	DTU_2024_1036895_100_MG_LVK_88_SE:_contig_56740	1552	3163	-	entE	1-1611/1611	========/======	2025-01-01	100	95.41	vfdb	NP_752612	(entE) 23-dihydroxybenzoate-AMP ligase component of enterobactin synthase multienzyme complex [Enterobactin (VF0228)] [Escherichia coli CFT073]
DTU_2024_1036895_100_MG_LVK_88_SE.metabat2.bin.182.fa	DTU_2024_1036895_100_MG_LVK_88_SE:_contig_56740	3173	4360	-	entC	2-1188/1188	========/======	2025-01-01	99.92	97.73	vfdb	NP_752611	(entC) isochorismate synthase 1 [Enterobactin (VF0228)] [Escherichia coli CFT073]
DTU_2024_1036895_100_MG_LVK_88_SE.metabat2.bin.182.fa	DTU_2024_1036895_100_MG_LVK_88_SE:_contig_56740	4724	5680	+	fepB	1-957/957	===============	0/0	100	97.49	vfdb	NP_752610	(fepB) ferrienterobactin ABC transporter periplasmic binding protein [Enterobactin (VF0228)] [Escherichia coli CFT073]
DTU_2024_1036895_100_MG_LVK_88_SE.metabat2.bin.182.fa	DTU_2024_1036895_100_MG_LVK_88_SE:_contig_56740	5684	6934	-	entS	1-1251/1251	===============	0/0	100	95.44	vfdb	NP_752609	(entS) enterobactin exporter iron-regulated [enterobactin (IA019)] [Escherichia coli CFT073]
DTU_2024_1036895_100_MG_LVK_88_SE.metabat2.bin.182.fa	DTU_2024_1036895_100_MG_LVK_88_SE:_contig_56740	7033	8049	+	fepD	1-1017/1017	===============	0/0	100	96.07	vfdb	NP_752608	(fepD) ferrienterobactin ABC transporter permease [Enterobactin (VF0228)] [Escherichia coli CFT073]
DTU_2024_1036895_100_MG_LVK_88_SE.metabat2.bin.182.fa	DTU_2024_1036895_100_MG_LVK_88_SE:_contig_56740	8046	9038	+	fepG	1-993/993	===============	0/0	100	94.06	vfdb	NP_752607	(fepG) iron-enterobactin ABC transporter permease [Enterobactin (VF0228)] [Escherichia coli CFT073]
DTU_2024_1036895_100_MG_LVK_88_SE.metabat2.bin.182.fa	DTU_2024_1036895_100_MG_LVK_88_SE:_contig_56740	9035	9850	+	fepC	1-816/816	===============	0/0	100	97.18	vfdb	NP_752606	(fepC) ferrienterobactin ABC transporter ATPase [Enterobactin (VF0228)] [Escherichia coli CFT073]
DTU_2024_1036895_100_MG_LVK_88_SE.metabat2.bin.182.fa	DTU_2024_1036895_100_MG_LVK_88_SE:_contig_56740	11225	15078	-	entF	1-3854/3882	===============	0/0	99.28	95.67	vfdb	NP_752604	(entF) enterobactin synthase multienzyme complex component ATP-dependent [Enterobactin (VF0228)] [Escherichia coli CFT073]
DTU_2024_1036895_100_MG_LVK_88_SE.metabat2.bin.182.fa	DTU_2024_1036895_100_MG_LVK_88_SE:_contig_58253	8428	9733	-	ybtS	1-1305/1305	========/======	2025-01-01	100	99.62	vfdb	NP_405477	(ybtS) salicylate synthase Irp9 [Yersiniabactin (VF0136)] [Yersinia pestis CO92]
DTU_2024_1036895_100_MG_LVK_88_SE.metabat2.bin.182.fa	DTU_2024_1036895_100_MG_LVK_88_SE:_contig_58253	9761	11045	-	ybtX	1-1281/1281	========/======	2025-04-03	100	98.68	vfdb	NP_405476	(ybtX) putative signal transducer [Yersiniabactin (VF0136)] [Yersinia pestis CO92]
DTU_2024_1036895_100_MG_LVK_88_SE.metabat2.bin.182.fa	DTU_2024_1036895_100_MG_LVK_88_SE:_contig_58253	11038	12846	-	ybtQ	2-1803/1803	========/======	2025-07-06	99.94	99.06	vfdb	NP_405475	(ybtQ) inner membrane ABC-transporter YbtQ [Yersiniabactin (VF0136)] [Yersinia pestis CO92]
DTU_2024_1036895_100_MG_LVK_88_SE.metabat2.bin.182.fa	DTU_2024_1036895_100_MG_LVK_88_SE:_contig_58253	12834	14578	-	ybtP	72-1803/1803	========/======	2013-07-01	96.06	98.62	vfdb	NP_405474	(ybtP) lipoprotein inner membrane ABC-transporter [Yersiniabactin (VF0136)] [Yersinia pestis CO92]
DTU_2024_1036897_100_MG_LVK_97_SE.metabat2.bin.79.fa	DTU_2024_1036897_100_MG_LVK_97_SE:_contig_11079	27970	29869	-	espL1	1-1899/1899	========/======	2025-01-01	100	96.05	vfdb	NP_288154	(espL1) Type III secretion system effector espL1 [LEE encoded T3SS (SS020)] [Escherichia coli O157:H7 str. EDL933]
DTU_2024_1036897_100_MG_LVK_97_SE.metabat2.bin.79.fa	DTU_2024_1036897_100_MG_LVK_97_SE:_contig_11558	6824	9010	-	espL4	1-2187/2187	===============	0/0	100	97.35	vfdb	NP_290644	(espL4) Type III secretion system effector EspL4 [LEE encoded T3SS (SS020)] [Escherichia coli O157:H7 str. EDL933]
DTU_2024_1036897_100_MG_LVK_97_SE.metabat2.bin.79.fa	DTU_2024_1036897_100_MG_LVK_97_SE:_contig_18144	29646	30698	-	ompA	1-1041/1041	========/======	2025-12-01	100	94.3	vfdb	AAF37887	(ompA) outer membrane protein A [OmpA (VF0236)] [Escherichia coli O18:K1:H7 str. RS218]
DTU_2024_1036897_100_MG_LVK_97_SE.metabat2.bin.79.fa	DTU_2024_1036897_100_MG_LVK_97_SE:_contig_1846	9489	10691	-	fes	1-1203/1203	===============	0/0	100	96.84	vfdb	NP_752602	(fes) enterobactin/ferric enterobactin esterase [enterobactin (IA019)] [Escherichia coli CFT073]
DTU_2024_1036897_100_MG_LVK_97_SE.metabat2.bin.79.fa	DTU_2024_1036897_100_MG_LVK_97_SE:_contig_1846	10934	13174	+	fepA	1-2241/2241	===============	0/0	100	96.74	vfdb	NP_752600	(fepA) ferrienterobactin outer membrane transporter [Enterobactin (VF0228)] [Escherichia coli CFT073]
DTU_2024_1036897_100_MG_LVK_97_SE.metabat2.bin.79.fa	DTU_2024_1036897_100_MG_LVK_97_SE:_contig_1846	13199	13969	+	entD	1-771/771	===============	0/0	100	95.2	vfdb	NP_752599	(entD) phosphopantetheinyl transferase component of enterobactin synthase multienzyme complex [Enterobactin (VF0228)] [Escherichia coli CFT073]
DTU_2024_1036897_100_MG_LVK_97_SE.metabat2.bin.79.fa	DTU_2024_1036897_100_MG_LVK_97_SE:_contig_18531	22804	22920	+	astA	1-117/117	===============	0/0	100	100	vfdb	BAA94855	(astA) heat-stable enterotoxin 1 [EAST1 (VF0216)] [Escherichia coli O44:H18 042]
DTU_2024_1036897_100_MG_LVK_97_SE.metabat2.bin.79.fa	DTU_2024_1036897_100_MG_LVK_97_SE:_contig_2099	4280	5110	+	gspC	1-831/831	===============	0/0	100	95.31	vfdb	YP_404599	(gspC) general secretion pathway protein C [T2SS (VF0333)] [Shigella dysenteriae Sd197]
DTU_2024_1036897_100_MG_LVK_97_SE.metabat2.bin.79.fa	DTU_2024_1036897_100_MG_LVK_97_SE:_contig_2099	5350	7200	+	gspD	1-1836/1836	========/======	2015-01-01	100	96.87	vfdb	YP_404600	(gspD) general secretion pathway protein D [T2SS (VF0333)] [Shigella dysenteriae Sd197]
DTU_2024_1036897_100_MG_LVK_97_SE.metabat2.bin.79.fa	DTU_2024_1036897_100_MG_LVK_97_SE:_contig_2100	1319	2519	+	gspF	1-1200/1200	========/======	2025-01-01	100	95.92	vfdb	YP_404602	(gspF) general secretion pathway protein F [T2SS (VF0333)] [Shigella dysenteriae Sd197]
DTU_2024_1036897_100_MG_LVK_97_SE.metabat2.bin.79.fa	DTU_2024_1036897_100_MG_LVK_97_SE:_contig_2100	2560	3015	+	gspG	1-456/456	===============	0/0	100	96.93	vfdb	YP_404603	(gspG) general secretion pathway protein G [T2SS (VF0333)] [Shigella dysenteriae Sd197]
DTU_2024_1036897_100_MG_LVK_97_SE.metabat2.bin.79.fa	DTU_2024_1036897_100_MG_LVK_97_SE:_contig_2100	3052	3582	+	gspH	1-531/531	===============	0/0	100	95.48	vfdb	YP_404604	(gspH) general secretion pathway protein H [T2SS (VF0333)] [Shigella dysenteriae Sd197]
DTU_2024_1036897_100_MG_LVK_97_SE.metabat2.bin.79.fa	DTU_2024_1036897_100_MG_LVK_97_SE:_contig_2100	3579	3950	+	gspI	1-372/372	===============	0/0	100	95.16	vfdb	YP_404605	(gspI) general secretion pathway protein I [T2SS (VF0333)] [Shigella dysenteriae Sd197]
DTU_2024_1036897_100_MG_LVK_97_SE.metabat2.bin.79.fa	DTU_2024_1036897_100_MG_LVK_97_SE:_contig_2100	3983	4552	+	gspJ	1-570/570	===============	0/0	100	94.39	vfdb	YP_404606	(gspJ) general secretion pathway protein J [T2SS (VF0333)] [Shigella dysenteriae Sd197]
DTU_2024_1036897_100_MG_LVK_97_SE.metabat2.bin.79.fa	DTU_2024_1036897_100_MG_LVK_97_SE:_contig_2100	4549	5526	+	gspK	1-978/978	===============	0/0	100	97.75	vfdb	YP_404607	(gspK) general secretion pathway protein K [T2SS (VF0333)] [Shigella dysenteriae Sd197]
DTU_2024_1036897_100_MG_LVK_97_SE.metabat2.bin.79.fa	DTU_2024_1036897_100_MG_LVK_97_SE:_contig_2100	5841	6701	+	gspL	1-861/861	===============	0/0	100	97.68	vfdb	YP_404608	(gspL) general secretion pathway protein L [T2SS (VF0333)] [Shigella dysenteriae Sd197]
DTU_2024_1036897_100_MG_LVK_97_SE.metabat2.bin.79.fa	DTU_2024_1036897_100_MG_LVK_97_SE:_contig_2100	6817	7238	+	gspM	1-422/423	===============	0/0	99.76	97.16	vfdb	YP_404609	(gspM) general secretion pathway protein M [T2SS (VF0333)] [Shigella dysenteriae Sd197]
DTU_2024_1036897_100_MG_LVK_97_SE.metabat2.bin.79.fa	DTU_2024_1036897_100_MG_LVK_97_SE:_contig_2100	8296	9072	+	kpsM	1-777/777	===============	0/0	100	94.98	vfdb	AAA24046	(kpsM) KpsM [K1 capsule (VF0239)] [Escherichia coli O18:K1:H7 str. RS218]
DTU_2024_1036897_100_MG_LVK_97_SE.metabat2.bin.79.fa	DTU_2024_1036897_100_MG_LVK_97_SE:_contig_2561	42933	44361	-	aslA	1-1428/1428	========/======	2025-01-01	100	93.42	vfdb	AAG10151	(aslA) putative arylsulfatase [AslA (VF0238)] [Escherichia coli O18:K1:H7 str. RS218]
DTU_2024_1036897_100_MG_LVK_97_SE.metabat2.bin.79.fa	DTU_2024_1036897_100_MG_LVK_97_SE:_contig_27012	29781	31203	+	espX1	1-1422/1422	========/======	2025-01-01	100	95.36	vfdb	NP_285716	(espX1) Type III secretion system effector EspX1 [LEE encoded T3SS (SS020)] [Escherichia coli O157:H7 str. EDL933]
DTU_2024_1036897_100_MG_LVK_97_SE.metabat2.bin.79.fa	DTU_2024_1036897_100_MG_LVK_97_SE:_contig_27054	3041	7290	-	fdeC	1-4226/4251	========/======	21/24	99.41	92.64	vfdb	YP_002390132	(fdeC) adhesin FdeC [FdeC (VF0506)] [Escherichia coli O45:K1:H7 str. S88]
DTU_2024_1036897_100_MG_LVK_97_SE.metabat2.bin.79.fa	DTU_2024_1036897_100_MG_LVK_97_SE:_contig_27054	10312	10902	+	ykgK/ecpR	1-591/591	===============	0/0	100	96.95	vfdb	NP_286011	(ykgK/ecpR) regulator protein EcpR [ECP (VF0404)] [Escherichia coli O157:H7 str. EDL933]
DTU_2024_1036897_100_MG_LVK_97_SE.metabat2.bin.79.fa	DTU_2024_1036897_100_MG_LVK_97_SE:_contig_27054	10977	11564	+	yagZ/ecpA	1-588/588	===============	0/0	100	99.15	vfdb	NP_286010	(yagZ/ecpA) E. coli common pilus structural subunit EcpA [ECP (VF0404)] [Escherichia coli O157:H7 str. EDL933]
DTU_2024_1036897_100_MG_LVK_97_SE.metabat2.bin.79.fa	DTU_2024_1036897_100_MG_LVK_97_SE:_contig_27054	11622	12290	+	yagY/ecpB	1-669/669	===============	0/0	100	98.06	vfdb	NP_286009	(yagY/ecpB) E. coli common pilus chaperone EcpB [ECP (VF0404)] [Escherichia coli O157:H7 str. EDL933]
DTU_2024_1036897_100_MG_LVK_97_SE.metabat2.bin.79.fa	DTU_2024_1036897_100_MG_LVK_97_SE:_contig_27054	12316	14841	+	yagX/ecpC	1-2526/2526	===============	0/0	100	98.73	vfdb	NP_286008	(yagX/ecpC) E. coli common pilus usher EcpC [ECP (VF0404)] [Escherichia coli O157:H7 str. EDL933]
DTU_2024_1036897_100_MG_LVK_97_SE.metabat2.bin.79.fa	DTU_2024_1036897_100_MG_LVK_97_SE:_contig_27054	14831	16476	+	yagW/ecpD	1-1644/1644	========/======	2025-02-02	100	98.91	vfdb	NP_286007	(yagW/ecpD) polymerized tip adhesin of ECP fibers [ECP (VF0404)] [Escherichia coli O157:H7 str. EDL933]
DTU_2024_1036897_100_MG_LVK_97_SE.metabat2.bin.79.fa	DTU_2024_1036897_100_MG_LVK_97_SE:_contig_27054	16400	17153	+	yagV/ecpE	1-754/756	===============	0/0	99.74	96.95	vfdb	NP_286006	(yagV/ecpE) E. coli common pilus chaperone EcpE [ECP (VF0404)] [Escherichia coli O157:H7 str. EDL933]
DTU_2024_1036897_100_MG_LVK_97_SE.metabat2.bin.79.fa	DTU_2024_1036897_100_MG_LVK_97_SE:_contig_27367	626	1441	-	fepC	1-816/816	===============	0/0	100	97.3	vfdb	NP_752606	(fepC) ferrienterobactin ABC transporter ATPase [Enterobactin (VF0228)] [Escherichia coli CFT073]
DTU_2024_1036897_100_MG_LVK_97_SE.metabat2.bin.79.fa	DTU_2024_1036897_100_MG_LVK_97_SE:_contig_27367	1438	2430	-	fepG	1-993/993	===============	0/0	100	94.06	vfdb	NP_752607	(fepG) iron-enterobactin ABC transporter permease [Enterobactin (VF0228)] [Escherichia coli CFT073]
DTU_2024_1036897_100_MG_LVK_97_SE.metabat2.bin.79.fa	DTU_2024_1036897_100_MG_LVK_97_SE:_contig_27367	2427	3443	-	fepD	1-1017/1017	===============	0/0	100	96.07	vfdb	NP_752608	(fepD) ferrienterobactin ABC transporter permease [Enterobactin (VF0228)] [Escherichia coli CFT073]
DTU_2024_1036897_100_MG_LVK_97_SE.metabat2.bin.79.fa	DTU_2024_1036897_100_MG_LVK_97_SE:_contig_27367	3542	4792	+	entS	1-1251/1251	===============	0/0	100	95.44	vfdb	NP_752609	(entS) enterobactin exporter iron-regulated [enterobactin (IA019)] [Escherichia coli CFT073]
DTU_2024_1036897_100_MG_LVK_97_SE.metabat2.bin.79.fa	DTU_2024_1036897_100_MG_LVK_97_SE:_contig_27367	4796	5753	-	fepB	1-957/957	========/======	2025-01-01	100	97.7	vfdb	NP_752610	(fepB) ferrienterobactin ABC transporter periplasmic binding protein [Enterobactin (VF0228)] [Escherichia coli CFT073]
DTU_2024_1036897_100_MG_LVK_97_SE.metabat2.bin.79.fa	DTU_2024_1036897_100_MG_LVK_97_SE:_contig_27367	6116	7303	+	entC	1-1188/1188	===============	0/0	100	97.9	vfdb	NP_752611	(entC) isochorismate synthase 1 [Enterobactin (VF0228)] [Escherichia coli CFT073]
DTU_2024_1036897_100_MG_LVK_97_SE.metabat2.bin.79.fa	DTU_2024_1036897_100_MG_LVK_97_SE:_contig_27367	7313	8923	+	entE	1-1611/1611	===============	0/0	100	95.47	vfdb	NP_752612	(entE) 23-dihydroxybenzoate-AMP ligase component of enterobactin synthase multienzyme complex [Enterobactin (VF0228)] [Escherichia coli CFT073]
DTU_2024_1036897_100_MG_LVK_97_SE.metabat2.bin.79.fa	DTU_2024_1036897_100_MG_LVK_97_SE:_contig_27367	8937	9794	+	entB	1-858/858	===============	0/0	100	98.14	vfdb	NP_752613	(entB) isochorismatase [Enterobactin (VF0228)] [Escherichia coli CFT073]
DTU_2024_1036897_100_MG_LVK_97_SE.metabat2.bin.79.fa	DTU_2024_1036897_100_MG_LVK_97_SE:_contig_27367	9794	10540	+	entA	1-747/747	===============	0/0	100	95.98	vfdb	NP_752614	(entA) 23-dihydro-23-dihydroxybenzoate dehydrogenase [Enterobactin (VF0228)] [Escherichia coli CFT073]
DTU_2024_1036897_100_MG_LVK_97_SE.metabat2.bin.79.fa	DTU_2024_1036897_100_MG_LVK_97_SE:_contig_8830	14747	16039	+	espX5	1-1293/1293	===============	0/0	100	96.91	vfdb	NP_290699	(espX5) Type III secretion system effector EspX5 [LEE encoded T3SS (SS020)] [Escherichia coli O157:H7 str. EDL933]
DTU_2024_1036897_100_MG_LVK_97_SE.metabat2.bin.79.fa	DTU_2024_1036897_100_MG_LVK_97_SE:_contig_8830	45551	47132	-	espX4	1-1581/1581	========/======	2025-03-03	99.94	92.92	vfdb	NP_290672	(espX4) Type III secretion system effector EspX4 [LEE encoded T3SS (SS020)] [Escherichia coli O157:H7 str. EDL933]
DTU_2024_1036898_100_MG_LVK_98_SE.metabat2.bin.158.fa	DTU_2024_1036898_100_MG_LVK_98_SE:_contig_21984	40409	41990	+	espX4	1-1581/1581	========/======	2025-01-01	100	93.36	vfdb	NP_290672	(espX4) Type III secretion system effector EspX4 [LEE encoded T3SS (SS020)] [Escherichia coli O157:H7 str. EDL933]
DTU_2024_1036898_100_MG_LVK_98_SE.metabat2.bin.158.fa	DTU_2024_1036898_100_MG_LVK_98_SE:_contig_22428	212	745	+	fimF	1-534/534	===============	0/0	100	97.38	vfdb	NP_757245	(fimF) FimF protein precursor [Type 1 fimbriae (VF0221)] [Escherichia coli CFT073]
DTU_2024_1036898_100_MG_LVK_98_SE.metabat2.bin.158.fa	DTU_2024_1036898_100_MG_LVK_98_SE:_contig_22428	758	1261	+	fimG	1-504/504	===============	0/0	100	97.82	vfdb	NP_757247	(fimG) FimG protein precursor [Type 1 fimbriae (VF0221)] [Escherichia coli CFT073]
DTU_2024_1036898_100_MG_LVK_98_SE.metabat2.bin.158.fa	DTU_2024_1036898_100_MG_LVK_98_SE:_contig_22428	1272	2183	+	fimH	1-912/912	===============	0/0	100	97.26	vfdb	NP_757248	(fimH) FimH protein precursor [Type 1 fimbriae (VF0221)] [Escherichia coli CFT073]
DTU_2024_1036898_100_MG_LVK_98_SE.metabat2.bin.158.fa	DTU_2024_1036898_100_MG_LVK_98_SE:_contig_24679	1449	2220	-	entD	1-771/771	========/======	2025-03-02	99.87	93.79	vfdb	NP_752599	(entD) phosphopantetheinyl transferase component of enterobactin synthase multienzyme complex [Enterobactin (VF0228)] [Escherichia coli CFT073]
DTU_2024_1036898_100_MG_LVK_98_SE.metabat2.bin.158.fa	DTU_2024_1036898_100_MG_LVK_98_SE:_contig_24679	2245	4485	-	fepA	1-2241/2241	===============	0/0	100	97.32	vfdb	NP_752600	(fepA) ferrienterobactin outer membrane transporter [Enterobactin (VF0228)] [Escherichia coli CFT073]
DTU_2024_1036898_100_MG_LVK_98_SE.metabat2.bin.158.fa	DTU_2024_1036898_100_MG_LVK_98_SE:_contig_24679	4728	5934	+	fes	1-1203/1203	========/======	2025-04-04	100	95.86	vfdb	NP_752602	(fes) enterobactin/ferric enterobactin esterase [enterobactin (IA019)] [Escherichia coli CFT073]
DTU_2024_1036898_100_MG_LVK_98_SE.metabat2.bin.158.fa	DTU_2024_1036898_100_MG_LVK_98_SE:_contig_24679	6155	10006	+	entF	3-3854/3882	===============	0/0	99.23	95.51	vfdb	NP_752604	(entF) enterobactin synthase multienzyme complex component ATP-dependent [Enterobactin (VF0228)] [Escherichia coli CFT073]
DTU_2024_1036898_100_MG_LVK_98_SE.metabat2.bin.158.fa	DTU_2024_1036898_100_MG_LVK_98_SE:_contig_24679	11380	12195	-	fepC	1-816/816	===============	0/0	100	97.18	vfdb	NP_752606	(fepC) ferrienterobactin ABC transporter ATPase [Enterobactin (VF0228)] [Escherichia coli CFT073]
DTU_2024_1036898_100_MG_LVK_98_SE.metabat2.bin.158.fa	DTU_2024_1036898_100_MG_LVK_98_SE:_contig_24679	12192	13184	-	fepG	1-993/993	===============	0/0	100	94.06	vfdb	NP_752607	(fepG) iron-enterobactin ABC transporter permease [Enterobactin (VF0228)] [Escherichia coli CFT073]
DTU_2024_1036898_100_MG_LVK_98_SE.metabat2.bin.158.fa	DTU_2024_1036898_100_MG_LVK_98_SE:_contig_24679	13181	14197	-	fepD	1-1017/1017	===============	0/0	100	96.46	vfdb	NP_752608	(fepD) ferrienterobactin ABC transporter permease [Enterobactin (VF0228)] [Escherichia coli CFT073]
DTU_2024_1036898_100_MG_LVK_98_SE.metabat2.bin.158.fa	DTU_2024_1036898_100_MG_LVK_98_SE:_contig_24679	14296	15546	+	entS	1-1251/1251	===============	0/0	100	95.6	vfdb	NP_752609	(entS) enterobactin exporter iron-regulated [enterobactin (IA019)] [Escherichia coli CFT073]
DTU_2024_1036898_100_MG_LVK_98_SE.metabat2.bin.158.fa	DTU_2024_1036898_100_MG_LVK_98_SE:_contig_24679	15550	16506	-	fepB	1-957/957	===============	0/0	100	97.49	vfdb	NP_752610	(fepB) ferrienterobactin ABC transporter periplasmic binding protein [Enterobactin (VF0228)] [Escherichia coli CFT073]
DTU_2024_1036898_100_MG_LVK_98_SE.metabat2.bin.158.fa	DTU_2024_1036898_100_MG_LVK_98_SE:_contig_24679	16869	18056	+	entC	1-1188/1188	===============	0/0	100	97.56	vfdb	NP_752611	(entC) isochorismate synthase 1 [Enterobactin (VF0228)] [Escherichia coli CFT073]
DTU_2024_1036898_100_MG_LVK_98_SE.metabat2.bin.158.fa	DTU_2024_1036898_100_MG_LVK_98_SE:_contig_24679	18066	19676	+	entE	1-1611/1611	===============	0/0	100	95.59	vfdb	NP_752612	(entE) 23-dihydroxybenzoate-AMP ligase component of enterobactin synthase multienzyme complex [Enterobactin (VF0228)] [Escherichia coli CFT073]
DTU_2024_1036898_100_MG_LVK_98_SE.metabat2.bin.158.fa	DTU_2024_1036898_100_MG_LVK_98_SE:_contig_24679	19690	20547	+	entB	1-858/858	===============	0/0	100	97.44	vfdb	NP_752613	(entB) isochorismatase [Enterobactin (VF0228)] [Escherichia coli CFT073]
DTU_2024_1036898_100_MG_LVK_98_SE.metabat2.bin.158.fa	DTU_2024_1036898_100_MG_LVK_98_SE:_contig_24679	20547	21293	+	entA	1-747/747	===============	0/0	100	95.98	vfdb	NP_752614	(entA) 23-dihydro-23-dihydroxybenzoate dehydrogenase [Enterobactin (VF0228)] [Escherichia coli CFT073]
DTU_2024_1036898_100_MG_LVK_98_SE.metabat2.bin.158.fa	DTU_2024_1036898_100_MG_LVK_98_SE:_contig_4574	56922	58345	-	espX1	1-1422/1422	========/======	2025-08-06	99.79	94.18	vfdb	NP_285716	(espX1) Type III secretion system effector EspX1 [LEE encoded T3SS (SS020)] [Escherichia coli O157:H7 str. EDL933]
DTU_2024_1036898_100_MG_LVK_98_SE.metabat2.bin.158.fa	DTU_2024_1036898_100_MG_LVK_98_SE:_contig_45793	35260	36551	+	espX5	1-1293/1293	========/======	2025-01-01	99.92	95.9	vfdb	NP_290699	(espX5) Type III secretion system effector EspX5 [LEE encoded T3SS (SS020)] [Escherichia coli O157:H7 str. EDL933]
DTU_2024_1036898_100_MG_LVK_98_SE.metabat2.bin.158.fa	DTU_2024_1036898_100_MG_LVK_98_SE:_contig_7001	974	2021	+	ompA	1-1041/1041	========/======	2025-09-08	99.9	96.76	vfdb	AAF37887	(ompA) outer membrane protein A [OmpA (VF0236)] [Escherichia coli O18:K1:H7 str. RS218]
DTU_2025_1037644_100_MG_LVK_18_SE.metabat2.bin.169.fa	DTU_2025_1037644_100_MG_LVK_18_SE:_contig_11135	1427	2485	-	espW	1-1059/1059	===============	0/0	100	98.39	vfdb	NP_289177	(espW) Type III secretion system effector EspW [LEE encoded T3SS (SS020)] [Escherichia coli O157:H7 str. EDL933]
DTU_2025_1037644_100_MG_LVK_18_SE.metabat2.bin.169.fa	DTU_2025_1037644_100_MG_LVK_18_SE:_contig_20113	2346	3549	-	fes	1-1203/1203	========/======	2025-01-01	100	97.26	vfdb	NP_752602	(fes) enterobactin/ferric enterobactin esterase [enterobactin (IA019)] [Escherichia coli CFT073]
DTU_2025_1037644_100_MG_LVK_18_SE.metabat2.bin.169.fa	DTU_2025_1037644_100_MG_LVK_18_SE:_contig_20113	3792	6032	+	fepA	1-2241/2241	===============	0/0	100	96.88	vfdb	NP_752600	(fepA) ferrienterobactin outer membrane transporter [Enterobactin (VF0228)] [Escherichia coli CFT073]
DTU_2025_1037644_100_MG_LVK_18_SE.metabat2.bin.169.fa	DTU_2025_1037644_100_MG_LVK_18_SE:_contig_20113	6057	6827	+	entD	1-771/771	===============	0/0	100	94.03	vfdb	NP_752599	(entD) phosphopantetheinyl transferase component of enterobactin synthase multienzyme complex [Enterobactin (VF0228)] [Escherichia coli CFT073]
DTU_2025_1037644_100_MG_LVK_18_SE.metabat2.bin.169.fa	DTU_2025_1037644_100_MG_LVK_18_SE:_contig_20115	32	619	-	yagZ/ecpA	1-588/588	===============	0/0	100	99.32	vfdb	NP_286010	(yagZ/ecpA) E. coli common pilus structural subunit EcpA [ECP (VF0404)] [Escherichia coli O157:H7 str. EDL933]
DTU_2025_1037644_100_MG_LVK_18_SE.metabat2.bin.169.fa	DTU_2025_1037644_100_MG_LVK_18_SE:_contig_20115	694	1284	-	ykgK/ecpR	1-591/591	===============	0/0	100	99.32	vfdb	NP_286011	(ykgK/ecpR) regulator protein EcpR [ECP (VF0404)] [Escherichia coli O157:H7 str. EDL933]
DTU_2025_1037644_100_MG_LVK_18_SE.metabat2.bin.169.fa	DTU_2025_1037644_100_MG_LVK_18_SE:_contig_20115	4303	8560	+	fdeC	1-4246/4251	========/======	2025-12-09	99.88	93.66	vfdb	YP_002390132	(fdeC) adhesin FdeC [FdeC (VF0506)] [Escherichia coli O45:K1:H7 str. S88]
DTU_2025_1037644_100_MG_LVK_18_SE.metabat2.bin.169.fa	DTU_2025_1037644_100_MG_LVK_18_SE:_contig_20115	10958	15180	-	fdeC	1-4229/4251	========/======	2018-08-01	99.2	90.65	vfdb	YP_002390132	(fdeC) adhesin FdeC [FdeC (VF0506)] [Escherichia coli O45:K1:H7 str. S88]
DTU_2025_1037644_100_MG_LVK_18_SE.metabat2.bin.169.fa	DTU_2025_1037644_100_MG_LVK_18_SE:_contig_20117	40	708	+	yagY/ecpB	1-669/669	===============	0/0	100	98.66	vfdb	NP_286009	(yagY/ecpB) E. coli common pilus chaperone EcpB [ECP (VF0404)] [Escherichia coli O157:H7 str. EDL933]
DTU_2025_1037644_100_MG_LVK_18_SE.metabat2.bin.169.fa	DTU_2025_1037644_100_MG_LVK_18_SE:_contig_20117	734	3260	+	yagX/ecpC	1-2526/2526	========/======	2025-01-01	100	99.05	vfdb	NP_286008	(yagX/ecpC) E. coli common pilus usher EcpC [ECP (VF0404)] [Escherichia coli O157:H7 str. EDL933]
DTU_2025_1037644_100_MG_LVK_18_SE.metabat2.bin.169.fa	DTU_2025_1037644_100_MG_LVK_18_SE:_contig_20117	3250	4893	+	yagW/ecpD	1-1644/1644	===============	0/0	100	99.27	vfdb	NP_286007	(yagW/ecpD) polymerized tip adhesin of ECP fibers [ECP (VF0404)] [Escherichia coli O157:H7 str. EDL933]
DTU_2025_1037644_100_MG_LVK_18_SE.metabat2.bin.169.fa	DTU_2025_1037644_100_MG_LVK_18_SE:_contig_20117	4817	5570	+	yagV/ecpE	1-754/756	===============	0/0	99.74	96.82	vfdb	NP_286006	(yagV/ecpE) E. coli common pilus chaperone EcpE [ECP (VF0404)] [Escherichia coli O157:H7 str. EDL933]
DTU_2025_1037644_100_MG_LVK_18_SE.metabat2.bin.169.fa	DTU_2025_1037644_100_MG_LVK_18_SE:_contig_2438	27055	28042	-	nleC	1-988/993	===============	0/0	99.5	94.23	vfdb	NP_286533	(nleC) Type III secretion system effector NleC zinc metalloprotease [NleC (VF0340)] [Escherichia coli O157:H7 str. EDL933]
DTU_2025_1037644_100_MG_LVK_18_SE.metabat2.bin.169.fa	DTU_2025_1037644_100_MG_LVK_18_SE:_contig_2438	130388	131299	-	fimH	1-912/912	===============	0/0	100	97.59	vfdb	NP_757248	(fimH) FimH protein precursor [Type 1 fimbriae (VF0221)] [Escherichia coli CFT073]
DTU_2025_1037644_100_MG_LVK_18_SE.metabat2.bin.169.fa	DTU_2025_1037644_100_MG_LVK_18_SE:_contig_2438	131310	131813	-	fimG	1-504/504	===============	0/0	100	98.21	vfdb	NP_757247	(fimG) FimG protein precursor [Type 1 fimbriae (VF0221)] [Escherichia coli CFT073]
DTU_2025_1037644_100_MG_LVK_18_SE.metabat2.bin.169.fa	DTU_2025_1037644_100_MG_LVK_18_SE:_contig_2438	131826	132359	-	fimF	1-534/534	===============	0/0	100	97.75	vfdb	NP_757245	(fimF) FimF protein precursor [Type 1 fimbriae (VF0221)] [Escherichia coli CFT073]
DTU_2025_1037644_100_MG_LVK_18_SE.metabat2.bin.169.fa	DTU_2025_1037644_100_MG_LVK_18_SE:_contig_2438	132366	135002	-	fimD	1-2637/2637	===============	0/0	100	98.67	vfdb	NP_757244	(fimD) Outer membrane usher protein fimD precursor [Type 1 fimbriae (VF0221)] [Escherichia coli CFT073]
DTU_2025_1037644_100_MG_LVK_18_SE.metabat2.bin.169.fa	DTU_2025_1037644_100_MG_LVK_18_SE:_contig_2438	135069	135794	-	fimC	1-726/726	===============	0/0	100	98.48	vfdb	NP_757243	(fimC) Chaperone protein fimC precursor [Type 1 fimbriae (VF0221)] [Escherichia coli CFT073]
DTU_2025_1037644_100_MG_LVK_18_SE.metabat2.bin.169.fa	DTU_2025_1037644_100_MG_LVK_18_SE:_contig_2438	135831	136370	-	fimI	1-540/540	===============	0/0	100	98.89	vfdb	NP_757242	(fimI) Fimbrin-like protein fimI precursor [Type 1 fimbriae (VF0221)] [Escherichia coli CFT073]
DTU_2025_1037644_100_MG_LVK_18_SE.metabat2.bin.169.fa	DTU_2025_1037644_100_MG_LVK_18_SE:_contig_2438	137471	138067	-	fimE	1-597/597	===============	0/0	100	99.33	vfdb	NP_757240	(fimE) Type 1 fimbriae Regulatory protein fimE [Type 1 fimbriae (VF0221)] [Escherichia coli CFT073]
DTU_2025_1037644_100_MG_LVK_18_SE.metabat2.bin.169.fa	DTU_2025_1037644_100_MG_LVK_18_SE:_contig_2438	138546	139148	-	fimB	1-603/603	===============	0/0	100	98.01	vfdb	NP_757239	(fimB) Type 1 fimbriae Regulatory protein fimB [Type 1 fimbriae (VF0221)] [Escherichia coli CFT073]
DTU_2025_1037644_100_MG_LVK_18_SE.metabat2.bin.169.fa	DTU_2025_1037644_100_MG_LVK_18_SE:_contig_2438	156892	157723	+	gspC	1-831/831	========/======	2025-01-01	100	95.31	vfdb	YP_404599	(gspC) general secretion pathway protein C [T2SS (VF0333)] [Shigella dysenteriae Sd197]
DTU_2025_1037644_100_MG_LVK_18_SE.metabat2.bin.169.fa	DTU_2025_1037644_100_MG_LVK_18_SE:_contig_2438	157963	159814	+	gspD	1-1836/1836	========/======	2016-02-01	100	97.19	vfdb	YP_404600	(gspD) general secretion pathway protein D [T2SS (VF0333)] [Shigella dysenteriae Sd197]
DTU_2025_1037644_100_MG_LVK_18_SE.metabat2.bin.169.fa	DTU_2025_1037644_100_MG_LVK_18_SE:_contig_2438	159814	161309	+	gspE	1-1494/1494	========/======	2025-02-01	100	96.06	vfdb	YP_404601	(gspE) general secretion pathway protein E [T2SS (VF0333)] [Shigella dysenteriae Sd197]
DTU_2025_1037644_100_MG_LVK_18_SE.metabat2.bin.169.fa	DTU_2025_1037644_100_MG_LVK_18_SE:_contig_2438	161309	162508	+	gspF	1-1200/1200	===============	0/0	100	95.58	vfdb	YP_404602	(gspF) general secretion pathway protein F [T2SS (VF0333)] [Shigella dysenteriae Sd197]
DTU_2025_1037644_100_MG_LVK_18_SE.metabat2.bin.169.fa	DTU_2025_1037644_100_MG_LVK_18_SE:_contig_2438	162549	163004	+	gspG	1-456/456	===============	0/0	100	95.61	vfdb	YP_404603	(gspG) general secretion pathway protein G [T2SS (VF0333)] [Shigella dysenteriae Sd197]
DTU_2025_1037644_100_MG_LVK_18_SE.metabat2.bin.169.fa	DTU_2025_1037644_100_MG_LVK_18_SE:_contig_2438	163041	163571	+	gspH	1-531/531	===============	0/0	100	96.05	vfdb	YP_404604	(gspH) general secretion pathway protein H [T2SS (VF0333)] [Shigella dysenteriae Sd197]
DTU_2025_1037644_100_MG_LVK_18_SE.metabat2.bin.169.fa	DTU_2025_1037644_100_MG_LVK_18_SE:_contig_2438	163568	163938	+	gspI	1-371/372	===============	0/0	99.73	94.88	vfdb	YP_404605	(gspI) general secretion pathway protein I [T2SS (VF0333)] [Shigella dysenteriae Sd197]
DTU_2025_1037644_100_MG_LVK_18_SE.metabat2.bin.169.fa	DTU_2025_1037644_100_MG_LVK_18_SE:_contig_2438	163972	164541	+	gspJ	1-570/570	===============	0/0	100	97.19	vfdb	YP_404606	(gspJ) general secretion pathway protein J [T2SS (VF0333)] [Shigella dysenteriae Sd197]
DTU_2025_1037644_100_MG_LVK_18_SE.metabat2.bin.169.fa	DTU_2025_1037644_100_MG_LVK_18_SE:_contig_2438	164538	165522	+	gspK	1-978/978	========/======	2025-07-06	100	96.75	vfdb	YP_404607	(gspK) general secretion pathway protein K [T2SS (VF0333)] [Shigella dysenteriae Sd197]
DTU_2025_1037644_100_MG_LVK_18_SE.metabat2.bin.169.fa	DTU_2025_1037644_100_MG_LVK_18_SE:_contig_2438	165837	166697	+	gspL	1-861/861	===============	0/0	100	97.1	vfdb	YP_404608	(gspL) general secretion pathway protein L [T2SS (VF0333)] [Shigella dysenteriae Sd197]
DTU_2025_1037644_100_MG_LVK_18_SE.metabat2.bin.169.fa	DTU_2025_1037644_100_MG_LVK_18_SE:_contig_2438	166813	167235	+	gspM	1-423/423	===============	0/0	100	96.69	vfdb	YP_404609	(gspM) general secretion pathway protein M [T2SS (VF0333)] [Shigella dysenteriae Sd197]
DTU_2025_1037644_100_MG_LVK_18_SE.metabat2.bin.169.fa	DTU_2025_1037644_100_MG_LVK_18_SE:_contig_34064	30024	31316	+	espX5	1-1293/1293	===============	0/0	100	96.75	vfdb	NP_290699	(espX5) Type III secretion system effector EspX5 [LEE encoded T3SS (SS020)] [Escherichia coli O157:H7 str. EDL933]
DTU_2025_1037644_100_MG_LVK_18_SE.metabat2.bin.169.fa	DTU_2025_1037644_100_MG_LVK_18_SE:_contig_34967	22274	23695	+	espX1	1-1422/1422	===============	0/0	100	94.44	vfdb	NP_285716	(espX1) Type III secretion system effector EspX1 [LEE encoded T3SS (SS020)] [Escherichia coli O157:H7 str. EDL933]
DTU_2025_1037644_100_MG_LVK_18_SE.metabat2.bin.169.fa	DTU_2025_1037644_100_MG_LVK_18_SE:_contig_35667	98140	100041	-	espL1	1-1899/1899	========/======	2025-03-03	100	97.16	vfdb	NP_288154	(espL1) Type III secretion system effector espL1 [LEE encoded T3SS (SS020)] [Escherichia coli O157:H7 str. EDL933]
DTU_2025_1037644_100_MG_LVK_18_SE.metabat2.bin.169.fa	DTU_2025_1037644_100_MG_LVK_18_SE:_contig_36372	197	1055	-	entB	1-858/858	========/======	2025-03-03	99.88	96.86	vfdb	NP_752613	(entB) isochorismatase [Enterobactin (VF0228)] [Escherichia coli CFT073]
DTU_2025_1037644_100_MG_LVK_18_SE.metabat2.bin.169.fa	DTU_2025_1037644_100_MG_LVK_18_SE:_contig_36372	1069	2679	-	entE	1-1611/1611	===============	0/0	100	95.78	vfdb	NP_752612	(entE) 23-dihydroxybenzoate-AMP ligase component of enterobactin synthase multienzyme complex [Enterobactin (VF0228)] [Escherichia coli CFT073]
DTU_2025_1037644_100_MG_LVK_18_SE.metabat2.bin.169.fa	DTU_2025_1037644_100_MG_LVK_18_SE:_contig_36372	2689	3876	-	entC	1-1188/1188	===============	0/0	100	97.9	vfdb	NP_752611	(entC) isochorismate synthase 1 [Enterobactin (VF0228)] [Escherichia coli CFT073]
DTU_2025_1037644_100_MG_LVK_18_SE.metabat2.bin.169.fa	DTU_2025_1037644_100_MG_LVK_18_SE:_contig_36372	4239	5195	+	fepB	1-957/957	===============	0/0	100	97.39	vfdb	NP_752610	(fepB) ferrienterobactin ABC transporter periplasmic binding protein [Enterobactin (VF0228)] [Escherichia coli CFT073]
DTU_2025_1037644_100_MG_LVK_18_SE.metabat2.bin.169.fa	DTU_2025_1037644_100_MG_LVK_18_SE:_contig_36372	5199	6449	-	entS	1-1251/1251	===============	0/0	100	95.44	vfdb	NP_752609	(entS) enterobactin exporter iron-regulated [enterobactin (IA019)] [Escherichia coli CFT073]
DTU_2025_1037644_100_MG_LVK_18_SE.metabat2.bin.169.fa	DTU_2025_1037644_100_MG_LVK_18_SE:_contig_36372	6548	7565	+	fepD	1-1017/1017	========/======	2025-01-01	100	95.97	vfdb	NP_752608	(fepD) ferrienterobactin ABC transporter permease [Enterobactin (VF0228)] [Escherichia coli CFT073]
DTU_2025_1037644_100_MG_LVK_18_SE.metabat2.bin.169.fa	DTU_2025_1037644_100_MG_LVK_18_SE:_contig_36372	7562	8554	+	fepG	1-993/993	========/======	2025-02-02	99.9	93.66	vfdb	NP_752607	(fepG) iron-enterobactin ABC transporter permease [Enterobactin (VF0228)] [Escherichia coli CFT073]
DTU_2025_1037644_100_MG_LVK_18_SE.metabat2.bin.169.fa	DTU_2025_1037644_100_MG_LVK_18_SE:_contig_36372	8551	9365	+	fepC	1-816/816	========/======	2025-07-05	99.51	95.73	vfdb	NP_752606	(fepC) ferrienterobactin ABC transporter ATPase [Enterobactin (VF0228)] [Escherichia coli CFT073]
DTU_2025_1037644_100_MG_LVK_18_SE.metabat2.bin.169.fa	DTU_2025_1037644_100_MG_LVK_18_SE:_contig_36372	12628	13443	-	fepC	1-816/816	===============	0/0	100	97.3	vfdb	NP_752606	(fepC) ferrienterobactin ABC transporter ATPase [Enterobactin (VF0228)] [Escherichia coli CFT073]
DTU_2025_1037644_100_MG_LVK_18_SE.metabat2.bin.169.fa	DTU_2025_1037644_100_MG_LVK_18_SE:_contig_36372	13440	14432	-	fepG	1-993/993	===============	0/0	100	94.06	vfdb	NP_752607	(fepG) iron-enterobactin ABC transporter permease [Enterobactin (VF0228)] [Escherichia coli CFT073]
DTU_2025_1037644_100_MG_LVK_18_SE.metabat2.bin.169.fa	DTU_2025_1037644_100_MG_LVK_18_SE:_contig_36372	14429	15446	-	fepD	1-1017/1017	========/======	2025-01-01	100	95.97	vfdb	NP_752608	(fepD) ferrienterobactin ABC transporter permease [Enterobactin (VF0228)] [Escherichia coli CFT073]
DTU_2025_1037644_100_MG_LVK_18_SE.metabat2.bin.169.fa	DTU_2025_1037644_100_MG_LVK_18_SE:_contig_36372	15545	16796	+	entS	1-1251/1251	========/======	2025-01-01	100	95.29	vfdb	NP_752609	(entS) enterobactin exporter iron-regulated [enterobactin (IA019)] [Escherichia coli CFT073]
DTU_2025_1037644_100_MG_LVK_18_SE.metabat2.bin.169.fa	DTU_2025_1037644_100_MG_LVK_18_SE:_contig_36372	16800	17760	-	fepB	1-957/957	========/======	2025-06-05	99.9	95.74	vfdb	NP_752610	(fepB) ferrienterobactin ABC transporter periplasmic binding protein [Enterobactin (VF0228)] [Escherichia coli CFT073]
DTU_2025_1037644_100_MG_LVK_18_SE.metabat2.bin.169.fa	DTU_2025_1037644_100_MG_LVK_18_SE:_contig_36372	19327	20929	+	entE	1-1611/1611	========/======	2018-11-01	99.19	93.19	vfdb	NP_752612	(entE) 23-dihydroxybenzoate-AMP ligase component of enterobactin synthase multienzyme complex [Enterobactin (VF0228)] [Escherichia coli CFT073]
DTU_2025_1037644_100_MG_LVK_18_SE.metabat2.bin.169.fa	DTU_2025_1037644_100_MG_LVK_18_SE:_contig_36372	20944	21805	+	entB	1-858/858	========/======	2025-06-03	99.88	96.41	vfdb	NP_752613	(entB) isochorismatase [Enterobactin (VF0228)] [Escherichia coli CFT073]
DTU_2025_1037644_100_MG_LVK_18_SE.metabat2.bin.169.fa	DTU_2025_1037644_100_MG_LVK_18_SE:_contig_36372	21805	22551	+	entA	1-747/747	===============	0/0	100	95.72	vfdb	NP_752614	(entA) 23-dihydro-23-dihydroxybenzoate dehydrogenase [Enterobactin (VF0228)] [Escherichia coli CFT073]
DTU_2025_1037644_100_MG_LVK_18_SE.metabat2.bin.169.fa	DTU_2025_1037644_100_MG_LVK_18_SE:_contig_36536	12498	14082	-	espX4	1-1581/1581	========/======	2025-04-04	100	93.38	vfdb	NP_290672	(espX4) Type III secretion system effector EspX4 [LEE encoded T3SS (SS020)] [Escherichia coli O157:H7 str. EDL933]
DTU_2025_1037644_100_MG_LVK_18_SE.metabat2.bin.169.fa	DTU_2025_1037644_100_MG_LVK_18_SE:_contig_36905	28084	29124	-	ompA	1-1041/1041	===============	0/0	100	98.08	vfdb	AAF37887	(ompA) outer membrane protein A [OmpA (VF0236)] [Escherichia coli O18:K1:H7 str. RS218]
DTU_2025_1037644_100_MG_LVK_18_SE.metabat2.bin.169.fa	DTU_2025_1037644_100_MG_LVK_18_SE:_contig_8665	16418	18609	+	espL4	1-2187/2187	========/======	2025-05-02	100	96.99	vfdb	NP_290644	(espL4) Type III secretion system effector EspL4 [LEE encoded T3SS (SS020)] [Escherichia coli O157:H7 str. EDL933]

## Sheet: blastn_vfdb_SI_MAGs
#FILE	SEQUENCE	START	END	STRAND	GENE	COVERAGE	COVERAGE_MAP	GAPS	%COVERAGE	%IDENTITY	DATABASE	ACCESSION	PRODUCT	RESISTANCE
DTU_2014_1035953_100_SI_LVK_17_SE.fq.gz_flye.fasta	DTU_2014_1035953_100_SI_LVK_17_SE.fq.gz_flye_contig_1	359270	359692	-	gspM	1-423/423	===============	0/0	100	98.34	vfdb	YP_404609	(gspM) general secretion pathway protein M [T2SS (VF0333)] [Shigella dysenteriae Sd197]
DTU_2014_1035953_100_SI_LVK_17_SE.fq.gz_flye.fasta	DTU_2014_1035953_100_SI_LVK_17_SE.fq.gz_flye_contig_1	359808	360668	-	gspL	1-861/861	===============	0/0	100	97.1	vfdb	YP_404608	(gspL) general secretion pathway protein L [T2SS (VF0333)] [Shigella dysenteriae Sd197]
DTU_2014_1035953_100_SI_LVK_17_SE.fq.gz_flye.fasta	DTU_2014_1035953_100_SI_LVK_17_SE.fq.gz_flye_contig_1	360983	361960	-	gspK	1-978/978	===============	0/0	100	97.03	vfdb	YP_404607	(gspK) general secretion pathway protein K [T2SS (VF0333)] [Shigella dysenteriae Sd197]
DTU_2014_1035953_100_SI_LVK_17_SE.fq.gz_flye.fasta	DTU_2014_1035953_100_SI_LVK_17_SE.fq.gz_flye_contig_1	361957	362526	-	gspJ	1-570/570	===============	0/0	100	96.67	vfdb	YP_404606	(gspJ) general secretion pathway protein J [T2SS (VF0333)] [Shigella dysenteriae Sd197]
DTU_2014_1035953_100_SI_LVK_17_SE.fq.gz_flye.fasta	DTU_2014_1035953_100_SI_LVK_17_SE.fq.gz_flye_contig_1	362559	362930	-	gspI	1-372/372	===============	0/0	100	95.16	vfdb	YP_404605	(gspI) general secretion pathway protein I [T2SS (VF0333)] [Shigella dysenteriae Sd197]
DTU_2014_1035953_100_SI_LVK_17_SE.fq.gz_flye.fasta	DTU_2014_1035953_100_SI_LVK_17_SE.fq.gz_flye_contig_1	362927	363457	-	gspH	1-531/531	===============	0/0	100	95.48	vfdb	YP_404604	(gspH) general secretion pathway protein H [T2SS (VF0333)] [Shigella dysenteriae Sd197]
DTU_2014_1035953_100_SI_LVK_17_SE.fq.gz_flye.fasta	DTU_2014_1035953_100_SI_LVK_17_SE.fq.gz_flye_contig_1	363494	363949	-	gspG	1-456/456	===============	0/0	100	94.96	vfdb	YP_404603	(gspG) general secretion pathway protein G [T2SS (VF0333)] [Shigella dysenteriae Sd197]
DTU_2014_1035953_100_SI_LVK_17_SE.fq.gz_flye.fasta	DTU_2014_1035953_100_SI_LVK_17_SE.fq.gz_flye_contig_1	363990	365189	-	gspF	1-1200/1200	===============	0/0	100	96	vfdb	YP_404602	(gspF) general secretion pathway protein F [T2SS (VF0333)] [Shigella dysenteriae Sd197]
DTU_2014_1035953_100_SI_LVK_17_SE.fq.gz_flye.fasta	DTU_2014_1035953_100_SI_LVK_17_SE.fq.gz_flye_contig_1	365189	366684	-	gspE	1-1494/1494	========/======	2025-02-02	100	96.06	vfdb	YP_404601	(gspE) general secretion pathway protein E [T2SS (VF0333)] [Shigella dysenteriae Sd197]
DTU_2014_1035953_100_SI_LVK_17_SE.fq.gz_flye.fasta	DTU_2014_1035953_100_SI_LVK_17_SE.fq.gz_flye_contig_10	25311	26351	+	ompA	1-1041/1041	===============	0/0	100	98.08	vfdb	AAF37887	(ompA) outer membrane protein A [OmpA (VF0236)] [Escherichia coli O18:K1:H7 str. RS218]
DTU_2014_1035953_100_SI_LVK_17_SE.fq.gz_flye.fasta	DTU_2014_1035953_100_SI_LVK_17_SE.fq.gz_flye_contig_10	450732	451478	-	entA	1-747/747	===============	0/0	100	95.72	vfdb	NP_752614	(entA) 23-dihydro-23-dihydroxybenzoate dehydrogenase [Enterobactin (VF0228)] [Escherichia coli CFT073]
DTU_2014_1035953_100_SI_LVK_17_SE.fq.gz_flye.fasta	DTU_2014_1035953_100_SI_LVK_17_SE.fq.gz_flye_contig_10	451478	452335	-	entB	1-858/858	===============	0/0	100	98.14	vfdb	NP_752613	(entB) isochorismatase [Enterobactin (VF0228)] [Escherichia coli CFT073]
DTU_2014_1035953_100_SI_LVK_17_SE.fq.gz_flye.fasta	DTU_2014_1035953_100_SI_LVK_17_SE.fq.gz_flye_contig_10	452349	453959	-	entE	1-1611/1611	===============	0/0	100	95.41	vfdb	NP_752612	(entE) 23-dihydroxybenzoate-AMP ligase component of enterobactin synthase multienzyme complex [Enterobactin (VF0228)] [Escherichia coli CFT073]
DTU_2014_1035953_100_SI_LVK_17_SE.fq.gz_flye.fasta	DTU_2014_1035953_100_SI_LVK_17_SE.fq.gz_flye_contig_10	453969	455156	-	entC	1-1188/1188	===============	0/0	100	97.9	vfdb	NP_752611	(entC) isochorismate synthase 1 [Enterobactin (VF0228)] [Escherichia coli CFT073]
DTU_2014_1035953_100_SI_LVK_17_SE.fq.gz_flye.fasta	DTU_2014_1035953_100_SI_LVK_17_SE.fq.gz_flye_contig_10	455519	456475	+	fepB	1-957/957	===============	0/0	100	97.49	vfdb	NP_752610	(fepB) ferrienterobactin ABC transporter periplasmic binding protein [Enterobactin (VF0228)] [Escherichia coli CFT073]
DTU_2014_1035953_100_SI_LVK_17_SE.fq.gz_flye.fasta	DTU_2014_1035953_100_SI_LVK_17_SE.fq.gz_flye_contig_10	456479	457729	-	entS	1-1251/1251	===============	0/0	100	95.36	vfdb	NP_752609	(entS) enterobactin exporter iron-regulated [enterobactin (IA019)] [Escherichia coli CFT073]
DTU_2014_1035953_100_SI_LVK_17_SE.fq.gz_flye.fasta	DTU_2014_1035953_100_SI_LVK_17_SE.fq.gz_flye_contig_10	457828	458844	+	fepD	1-1017/1017	===============	0/0	100	96.07	vfdb	NP_752608	(fepD) ferrienterobactin ABC transporter permease [Enterobactin (VF0228)] [Escherichia coli CFT073]
DTU_2014_1035953_100_SI_LVK_17_SE.fq.gz_flye.fasta	DTU_2014_1035953_100_SI_LVK_17_SE.fq.gz_flye_contig_10	458841	459833	+	fepG	1-993/993	===============	0/0	100	94.06	vfdb	NP_752607	(fepG) iron-enterobactin ABC transporter permease [Enterobactin (VF0228)] [Escherichia coli CFT073]
DTU_2014_1035953_100_SI_LVK_17_SE.fq.gz_flye.fasta	DTU_2014_1035953_100_SI_LVK_17_SE.fq.gz_flye_contig_10	459830	460645	+	fepC	1-816/816	===============	0/0	100	97.3	vfdb	NP_752606	(fepC) ferrienterobactin ABC transporter ATPase [Enterobactin (VF0228)] [Escherichia coli CFT073]
DTU_2014_1035953_100_SI_LVK_17_SE.fq.gz_flye.fasta	DTU_2014_1035953_100_SI_LVK_17_SE.fq.gz_flye_contig_10	462019	465872	-	entF	1-3854/3882	===============	0/0	99.28	95.69	vfdb	NP_752604	(entF) enterobactin synthase multienzyme complex component ATP-dependent [Enterobactin (VF0228)] [Escherichia coli CFT073]
DTU_2014_1035953_100_SI_LVK_17_SE.fq.gz_flye.fasta	DTU_2014_1035953_100_SI_LVK_17_SE.fq.gz_flye_contig_10	466090	467292	-	fes	1-1203/1203	===============	0/0	100	96.67	vfdb	NP_752602	(fes) enterobactin/ferric enterobactin esterase [enterobactin (IA019)] [Escherichia coli CFT073]
DTU_2014_1035953_100_SI_LVK_17_SE.fq.gz_flye.fasta	DTU_2014_1035953_100_SI_LVK_17_SE.fq.gz_flye_contig_10	467535	469775	+	fepA	1-2241/2241	===============	0/0	100	96.74	vfdb	NP_752600	(fepA) ferrienterobactin outer membrane transporter [Enterobactin (VF0228)] [Escherichia coli CFT073]
DTU_2014_1035953_100_SI_LVK_17_SE.fq.gz_flye.fasta	DTU_2014_1035953_100_SI_LVK_17_SE.fq.gz_flye_contig_10	469800	470570	+	entD	1-771/771	===============	0/0	100	95.07	vfdb	NP_752599	(entD) phosphopantetheinyl transferase component of enterobactin synthase multienzyme complex [Enterobactin (VF0228)] [Escherichia coli CFT073]
DTU_2014_1035953_100_SI_LVK_17_SE.fq.gz_flye.fasta	DTU_2014_1035953_100_SI_LVK_17_SE.fq.gz_flye_contig_11	1263	2758	+	gspE	1-1494/1494	========/======	2025-02-02	100	96.12	vfdb	YP_404601	(gspE) general secretion pathway protein E [T2SS (VF0333)] [Shigella dysenteriae Sd197]
DTU_2014_1035953_100_SI_LVK_17_SE.fq.gz_flye.fasta	DTU_2014_1035953_100_SI_LVK_17_SE.fq.gz_flye_contig_11	2758	3960	+	gspF	1-1200/1200	========/======	2025-03-03	100	95.59	vfdb	YP_404602	(gspF) general secretion pathway protein F [T2SS (VF0333)] [Shigella dysenteriae Sd197]
DTU_2014_1035953_100_SI_LVK_17_SE.fq.gz_flye.fasta	DTU_2014_1035953_100_SI_LVK_17_SE.fq.gz_flye_contig_11	4001	4456	+	gspG	1-456/456	===============	0/0	100	94.96	vfdb	YP_404603	(gspG) general secretion pathway protein G [T2SS (VF0333)] [Shigella dysenteriae Sd197]
DTU_2014_1035953_100_SI_LVK_17_SE.fq.gz_flye.fasta	DTU_2014_1035953_100_SI_LVK_17_SE.fq.gz_flye_contig_11	4493	5024	+	gspH	1-531/531	========/======	2025-01-01	100	95.49	vfdb	YP_404604	(gspH) general secretion pathway protein H [T2SS (VF0333)] [Shigella dysenteriae Sd197]
DTU_2014_1035953_100_SI_LVK_17_SE.fq.gz_flye.fasta	DTU_2014_1035953_100_SI_LVK_17_SE.fq.gz_flye_contig_11	5021	5392	+	gspI	1-372/372	===============	0/0	100	95.16	vfdb	YP_404605	(gspI) general secretion pathway protein I [T2SS (VF0333)] [Shigella dysenteriae Sd197]
DTU_2014_1035953_100_SI_LVK_17_SE.fq.gz_flye.fasta	DTU_2014_1035953_100_SI_LVK_17_SE.fq.gz_flye_contig_11	5425	5994	+	gspJ	1-570/570	===============	0/0	100	96.67	vfdb	YP_404606	(gspJ) general secretion pathway protein J [T2SS (VF0333)] [Shigella dysenteriae Sd197]
DTU_2014_1035953_100_SI_LVK_17_SE.fq.gz_flye.fasta	DTU_2014_1035953_100_SI_LVK_17_SE.fq.gz_flye_contig_11	5991	6968	+	gspK	1-978/978	===============	0/0	100	97.03	vfdb	YP_404607	(gspK) general secretion pathway protein K [T2SS (VF0333)] [Shigella dysenteriae Sd197]
DTU_2014_1035953_100_SI_LVK_17_SE.fq.gz_flye.fasta	DTU_2014_1035953_100_SI_LVK_17_SE.fq.gz_flye_contig_11	7283	8143	+	gspL	1-861/861	===============	0/0	100	95.59	vfdb	YP_404608	(gspL) general secretion pathway protein L [T2SS (VF0333)] [Shigella dysenteriae Sd197]
DTU_2014_1035953_100_SI_LVK_17_SE.fq.gz_flye.fasta	DTU_2014_1035953_100_SI_LVK_17_SE.fq.gz_flye_contig_11	8259	8681	+	gspM	1-423/423	===============	0/0	100	94.8	vfdb	YP_404609	(gspM) general secretion pathway protein M [T2SS (VF0333)] [Shigella dysenteriae Sd197]
DTU_2014_1035953_100_SI_LVK_17_SE.fq.gz_flye.fasta	DTU_2014_1035953_100_SI_LVK_17_SE.fq.gz_flye_contig_18	137782	138612	+	gspC	1-831/831	===============	0/0	100	93.38	vfdb	YP_404599	(gspC) general secretion pathway protein C [T2SS (VF0333)] [Shigella dysenteriae Sd197]
DTU_2014_1035953_100_SI_LVK_17_SE.fq.gz_flye.fasta	DTU_2014_1035953_100_SI_LVK_17_SE.fq.gz_flye_contig_18	138852	140702	+	gspD	1-1836/1836	========/======	2015-01-01	100	94.11	vfdb	YP_404600	(gspD) general secretion pathway protein D [T2SS (VF0333)] [Shigella dysenteriae Sd197]
DTU_2014_1035953_100_SI_LVK_17_SE.fq.gz_flye.fasta	DTU_2014_1035953_100_SI_LVK_17_SE.fq.gz_flye_contig_18	140702	142196	+	gspE	1-1494/1494	========/======	2025-01-01	100	95.99	vfdb	YP_404601	(gspE) general secretion pathway protein E [T2SS (VF0333)] [Shigella dysenteriae Sd197]
DTU_2014_1035953_100_SI_LVK_17_SE.fq.gz_flye.fasta	DTU_2014_1035953_100_SI_LVK_17_SE.fq.gz_flye_contig_18	142196	143397	+	gspF	1-1200/1200	========/======	2025-02-02	100	95.76	vfdb	YP_404602	(gspF) general secretion pathway protein F [T2SS (VF0333)] [Shigella dysenteriae Sd197]
DTU_2014_1035953_100_SI_LVK_17_SE.fq.gz_flye.fasta	DTU_2014_1035953_100_SI_LVK_17_SE.fq.gz_flye_contig_2	348892	350791	+	espL1	1-1899/1899	========/======	2025-01-01	100	97.53	vfdb	NP_288154	(espL1) Type III secretion system effector espL1 [LEE encoded T3SS (SS020)] [Escherichia coli O157:H7 str. EDL933]
DTU_2014_1035953_100_SI_LVK_17_SE.fq.gz_flye.fasta	DTU_2014_1035953_100_SI_LVK_17_SE.fq.gz_flye_contig_23	72198	72951	-	yagV/ecpE	1-754/756	===============	0/0	99.74	97.08	vfdb	NP_286006	(yagV/ecpE) E. coli common pilus chaperone EcpE [ECP (VF0404)] [Escherichia coli O157:H7 str. EDL933]
DTU_2014_1035953_100_SI_LVK_17_SE.fq.gz_flye.fasta	DTU_2014_1035953_100_SI_LVK_17_SE.fq.gz_flye_contig_23	72875	74518	-	yagW/ecpD	1-1644/1644	===============	0/0	100	99.09	vfdb	NP_286007	(yagW/ecpD) polymerized tip adhesin of ECP fibers [ECP (VF0404)] [Escherichia coli O157:H7 str. EDL933]
DTU_2014_1035953_100_SI_LVK_17_SE.fq.gz_flye.fasta	DTU_2014_1035953_100_SI_LVK_17_SE.fq.gz_flye_contig_23	74508	77033	-	yagX/ecpC	1-2526/2526	===============	0/0	100	98.77	vfdb	NP_286008	(yagX/ecpC) E. coli common pilus usher EcpC [ECP (VF0404)] [Escherichia coli O157:H7 str. EDL933]
DTU_2014_1035953_100_SI_LVK_17_SE.fq.gz_flye.fasta	DTU_2014_1035953_100_SI_LVK_17_SE.fq.gz_flye_contig_23	77059	77727	-	yagY/ecpB	1-669/669	===============	0/0	100	98.06	vfdb	NP_286009	(yagY/ecpB) E. coli common pilus chaperone EcpB [ECP (VF0404)] [Escherichia coli O157:H7 str. EDL933]
DTU_2014_1035953_100_SI_LVK_17_SE.fq.gz_flye.fasta	DTU_2014_1035953_100_SI_LVK_17_SE.fq.gz_flye_contig_23	77785	78372	-	yagZ/ecpA	1-588/588	===============	0/0	100	98.81	vfdb	NP_286010	(yagZ/ecpA) E. coli common pilus structural subunit EcpA [ECP (VF0404)] [Escherichia coli O157:H7 str. EDL933]
DTU_2014_1035953_100_SI_LVK_17_SE.fq.gz_flye.fasta	DTU_2014_1035953_100_SI_LVK_17_SE.fq.gz_flye_contig_23	78447	79037	-	ykgK/ecpR	1-591/591	===============	0/0	100	96.95	vfdb	NP_286011	(ykgK/ecpR) regulator protein EcpR [ECP (VF0404)] [Escherichia coli O157:H7 str. EDL933]
DTU_2014_1035953_100_SI_LVK_17_SE.fq.gz_flye.fasta	DTU_2014_1035953_100_SI_LVK_17_SE.fq.gz_flye_contig_23	82834	87082	+	fdeC	1-4246/4251	========/======	2025-03-01	99.88	94.21	vfdb	YP_002390132	(fdeC) adhesin FdeC [FdeC (VF0506)] [Escherichia coli O45:K1:H7 str. S88]
DTU_2014_1035953_100_SI_LVK_17_SE.fq.gz_flye.fasta	DTU_2014_1035953_100_SI_LVK_17_SE.fq.gz_flye_contig_26	58805	60241	-	hlyD	1-1437/1437	===============	0/0	100	96.73	vfdb	NP_755449	(hlyD) Hemolysin D [Hemolysin (VF0225)] [Escherichia coli CFT073]
DTU_2014_1035953_100_SI_LVK_17_SE.fq.gz_flye.fasta	DTU_2014_1035953_100_SI_LVK_17_SE.fq.gz_flye_contig_26	60260	62383	-	hlyB	1-2124/2124	===============	0/0	100	98.12	vfdb	NP_755448	(hlyB) Hemolysin B [Hemolysin (VF0225)] [Escherichia coli CFT073]
DTU_2014_1035953_100_SI_LVK_17_SE.fq.gz_flye.fasta	DTU_2014_1035953_100_SI_LVK_17_SE.fq.gz_flye_contig_26	62455	65529	-	hlyA	1-3075/3075	===============	0/0	100	96.88	vfdb	NP_755445	(hlyA) Hemolysin A [Hemolysin (VF0225)] [Escherichia coli CFT073]
DTU_2014_1035953_100_SI_LVK_17_SE.fq.gz_flye.fasta	DTU_2014_1035953_100_SI_LVK_17_SE.fq.gz_flye_contig_29	171	593	-	gspM	1-423/423	===============	0/0	100	94.8	vfdb	YP_404609	(gspM) general secretion pathway protein M [T2SS (VF0333)] [Shigella dysenteriae Sd197]
DTU_2014_1035953_100_SI_LVK_17_SE.fq.gz_flye.fasta	DTU_2014_1035953_100_SI_LVK_17_SE.fq.gz_flye_contig_29	709	1569	-	gspL	1-861/861	===============	0/0	100	95.59	vfdb	YP_404608	(gspL) general secretion pathway protein L [T2SS (VF0333)] [Shigella dysenteriae Sd197]
DTU_2014_1035953_100_SI_LVK_17_SE.fq.gz_flye.fasta	DTU_2014_1035953_100_SI_LVK_17_SE.fq.gz_flye_contig_29	1885	2862	-	gspK	1-978/978	===============	0/0	100	96.83	vfdb	YP_404607	(gspK) general secretion pathway protein K [T2SS (VF0333)] [Shigella dysenteriae Sd197]
DTU_2014_1035953_100_SI_LVK_17_SE.fq.gz_flye.fasta	DTU_2014_1035953_100_SI_LVK_17_SE.fq.gz_flye_contig_29	2859	3428	-	gspJ	1-570/570	===============	0/0	100	92.98	vfdb	YP_404606	(gspJ) general secretion pathway protein J [T2SS (VF0333)] [Shigella dysenteriae Sd197]
DTU_2014_1035953_100_SI_LVK_17_SE.fq.gz_flye.fasta	DTU_2014_1035953_100_SI_LVK_17_SE.fq.gz_flye_contig_29	3461	3832	-	gspI	1-372/372	===============	0/0	100	94.09	vfdb	YP_404605	(gspI) general secretion pathway protein I [T2SS (VF0333)] [Shigella dysenteriae Sd197]
DTU_2014_1035953_100_SI_LVK_17_SE.fq.gz_flye.fasta	DTU_2014_1035953_100_SI_LVK_17_SE.fq.gz_flye_contig_29	3829	4360	-	gspH	1-531/531	========/======	2025-01-01	100	96.24	vfdb	YP_404604	(gspH) general secretion pathway protein H [T2SS (VF0333)] [Shigella dysenteriae Sd197]
DTU_2014_1035953_100_SI_LVK_17_SE.fq.gz_flye.fasta	DTU_2014_1035953_100_SI_LVK_17_SE.fq.gz_flye_contig_29	4397	4852	-	gspG	1-456/456	===============	0/0	100	95.83	vfdb	YP_404603	(gspG) general secretion pathway protein G [T2SS (VF0333)] [Shigella dysenteriae Sd197]
DTU_2014_1035953_100_SI_LVK_17_SE.fq.gz_flye.fasta	DTU_2014_1035953_100_SI_LVK_17_SE.fq.gz_flye_contig_29	4893	6093	-	gspF	1-1200/1200	========/======	2025-01-01	100	95.92	vfdb	YP_404602	(gspF) general secretion pathway protein F [T2SS (VF0333)] [Shigella dysenteriae Sd197]
DTU_2014_1035953_100_SI_LVK_17_SE.fq.gz_flye.fasta	DTU_2014_1035953_100_SI_LVK_17_SE.fq.gz_flye_contig_29	6093	7586	-	gspE	1-1494/1494	===============	0/0	100	96.52	vfdb	YP_404601	(gspE) general secretion pathway protein E [T2SS (VF0333)] [Shigella dysenteriae Sd197]
DTU_2014_1035953_100_SI_LVK_17_SE.fq.gz_flye.fasta	DTU_2014_1035953_100_SI_LVK_17_SE.fq.gz_flye_contig_29	7586	9436	-	gspD	1-1836/1836	========/======	2015-01-01	100	96.87	vfdb	YP_404600	(gspD) general secretion pathway protein D [T2SS (VF0333)] [Shigella dysenteriae Sd197]
DTU_2014_1035953_100_SI_LVK_17_SE.fq.gz_flye.fasta	DTU_2014_1035953_100_SI_LVK_17_SE.fq.gz_flye_contig_29	9547	10358	-	gspC	1-812/831	===============	0/0	97.71	96.67	vfdb	YP_404599	(gspC) general secretion pathway protein C [T2SS (VF0333)] [Shigella dysenteriae Sd197]
DTU_2014_1035953_100_SI_LVK_17_SE.fq.gz_flye.fasta	DTU_2014_1035953_100_SI_LVK_17_SE.fq.gz_flye_contig_4	45046	46338	+	espX5	1-1293/1293	===============	0/0	100	96.6	vfdb	NP_290699	(espX5) Type III secretion system effector EspX5 [LEE encoded T3SS (SS020)] [Escherichia coli O157:H7 str. EDL933]
DTU_2014_1035953_100_SI_LVK_17_SE.fq.gz_flye.fasta	DTU_2014_1035953_100_SI_LVK_17_SE.fq.gz_flye_contig_4	112620	114200	-	espX4	1-1581/1581	===============	0/0	100	96.33	vfdb	NP_290672	(espX4) Type III secretion system effector EspX4 [LEE encoded T3SS (SS020)] [Escherichia coli O157:H7 str. EDL933]
DTU_2014_1035953_100_SI_LVK_17_SE.fq.gz_flye.fasta	DTU_2014_1035953_100_SI_LVK_17_SE.fq.gz_flye_contig_4	142416	144602	+	espL4	1-2187/2187	===============	0/0	100	97.3	vfdb	NP_290644	(espL4) Type III secretion system effector EspL4 [LEE encoded T3SS (SS020)] [Escherichia coli O157:H7 str. EDL933]
DTU_2014_1035953_100_SI_LVK_17_SE.fq.gz_flye.fasta	DTU_2014_1035953_100_SI_LVK_17_SE.fq.gz_flye_contig_4	379227	380655	+	aslA	1-1428/1428	========/======	2025-01-01	100	92.86	vfdb	AAG10151	(aslA) putative arylsulfatase [AslA (VF0238)] [Escherichia coli O18:K1:H7 str. RS218]
DTU_2014_1035953_100_SI_LVK_17_SE.fq.gz_flye.fasta	DTU_2014_1035953_100_SI_LVK_17_SE.fq.gz_flye_contig_6	104659	105261	+	fimB	1-603/603	===============	0/0	100	97.84	vfdb	NP_757239	(fimB) Type 1 fimbriae Regulatory protein fimB [Type 1 fimbriae (VF0221)] [Escherichia coli CFT073]
DTU_2014_1035953_100_SI_LVK_17_SE.fq.gz_flye.fasta	DTU_2014_1035953_100_SI_LVK_17_SE.fq.gz_flye_contig_6	105739	106335	+	fimE	1-597/597	===============	0/0	100	99	vfdb	NP_757240	(fimE) Type 1 fimbriae Regulatory protein fimE [Type 1 fimbriae (VF0221)] [Escherichia coli CFT073]
DTU_2014_1035953_100_SI_LVK_17_SE.fq.gz_flye.fasta	DTU_2014_1035953_100_SI_LVK_17_SE.fq.gz_flye_contig_6	106759	107364	+	fimA	1-606/606	===============	0/0	100	90.1	vfdb	NP_757241	(fimA) Type-1 fimbrial protein A chain precursor [Type 1 fimbriae (VF0221)] [Escherichia coli CFT073]
DTU_2014_1035953_100_SI_LVK_17_SE.fq.gz_flye.fasta	DTU_2014_1035953_100_SI_LVK_17_SE.fq.gz_flye_contig_6	107429	107967	+	fimI	1-540/540	========/======	2025-01-01	99.81	98.7	vfdb	NP_757242	(fimI) Fimbrin-like protein fimI precursor [Type 1 fimbriae (VF0221)] [Escherichia coli CFT073]
DTU_2014_1035953_100_SI_LVK_17_SE.fq.gz_flye.fasta	DTU_2014_1035953_100_SI_LVK_17_SE.fq.gz_flye_contig_6	108004	108729	+	fimC	1-726/726	===============	0/0	100	98.35	vfdb	NP_757243	(fimC) Chaperone protein fimC precursor [Type 1 fimbriae (VF0221)] [Escherichia coli CFT073]
DTU_2014_1035953_100_SI_LVK_17_SE.fq.gz_flye.fasta	DTU_2014_1035953_100_SI_LVK_17_SE.fq.gz_flye_contig_6	108796	111432	+	fimD	1-2637/2637	===============	0/0	100	98.52	vfdb	NP_757244	(fimD) Outer membrane usher protein fimD precursor [Type 1 fimbriae (VF0221)] [Escherichia coli CFT073]
DTU_2014_1035953_100_SI_LVK_17_SE.fq.gz_flye.fasta	DTU_2014_1035953_100_SI_LVK_17_SE.fq.gz_flye_contig_6	111439	111972	+	fimF	1-534/534	===============	0/0	100	97.38	vfdb	NP_757245	(fimF) FimF protein precursor [Type 1 fimbriae (VF0221)] [Escherichia coli CFT073]
DTU_2014_1035953_100_SI_LVK_17_SE.fq.gz_flye.fasta	DTU_2014_1035953_100_SI_LVK_17_SE.fq.gz_flye_contig_6	111985	112488	+	fimG	1-504/504	===============	0/0	100	98.21	vfdb	NP_757247	(fimG) FimG protein precursor [Type 1 fimbriae (VF0221)] [Escherichia coli CFT073]
DTU_2014_1035953_100_SI_LVK_17_SE.fq.gz_flye.fasta	DTU_2014_1035953_100_SI_LVK_17_SE.fq.gz_flye_contig_6	112499	113410	+	fimH	1-912/912	===============	0/0	100	97.37	vfdb	NP_757248	(fimH) FimH protein precursor [Type 1 fimbriae (VF0221)] [Escherichia coli CFT073]
DTU_2014_1035953_100_SI_LVK_17_SE.fq.gz_flye.fasta	DTU_2014_1035953_100_SI_LVK_17_SE.fq.gz_flye_contig_6	226869	228290	-	espX1	1-1422/1422	========/======	2025-02-02	99.93	95.29	vfdb	NP_285716	(espX1) Type III secretion system effector EspX1 [LEE encoded T3SS (SS020)] [Escherichia coli O157:H7 str. EDL933]
DTU_2014_1035953_100_SI_LVK_17_SE.fq.gz_flye.fasta	DTU_2014_1035953_100_SI_LVK_17_SE.fq.gz_flye_contig_6	266557	267338	+	espY1	1-753/753	========/======	1931-03-01	99.87	90.42	vfdb	NP_285753	(espY1) Type III secretion system effector EspY1 [LEE encoded T3SS (SS020)] [Escherichia coli O157:H7 str. EDL933]
DTU_2024_1035952_100_SI_LVK_11_SE.fq.gz_flye.fasta	DTU_2024_1035952_100_SI_LVK_11_SE.fq.gz_flye_contig_1	183068	184966	+	espL1	1-1899/1899	===============	0/0	100	98.42	vfdb	NP_288154	(espL1) Type III secretion system effector espL1 [LEE encoded T3SS (SS020)] [Escherichia coli O157:H7 str. EDL933]
DTU_2024_1035952_100_SI_LVK_11_SE.fq.gz_flye.fasta	DTU_2024_1035952_100_SI_LVK_11_SE.fq.gz_flye_contig_11	22354	25428	+	hlyA	1-3075/3075	===============	0/0	100	96.98	vfdb	NP_755445	(hlyA) Hemolysin A [Hemolysin (VF0225)] [Escherichia coli CFT073]
DTU_2024_1035952_100_SI_LVK_11_SE.fq.gz_flye.fasta	DTU_2024_1035952_100_SI_LVK_11_SE.fq.gz_flye_contig_11	25500	27623	+	hlyB	1-2124/2124	===============	0/0	100	98.12	vfdb	NP_755448	(hlyB) Hemolysin B [Hemolysin (VF0225)] [Escherichia coli CFT073]
DTU_2024_1035952_100_SI_LVK_11_SE.fq.gz_flye.fasta	DTU_2024_1035952_100_SI_LVK_11_SE.fq.gz_flye_contig_11	27642	29078	+	hlyD	1-1437/1437	===============	0/0	100	96.8	vfdb	NP_755449	(hlyD) Hemolysin D [Hemolysin (VF0225)] [Escherichia coli CFT073]
DTU_2024_1035952_100_SI_LVK_11_SE.fq.gz_flye.fasta	DTU_2024_1035952_100_SI_LVK_11_SE.fq.gz_flye_contig_12	114709	115464	-	yagV/ecpE	1-756/756	===============	0/0	100	98.15	vfdb	NP_286006	(yagV/ecpE) E. coli common pilus chaperone EcpE [ECP (VF0404)] [Escherichia coli O157:H7 str. EDL933]
DTU_2024_1035952_100_SI_LVK_11_SE.fq.gz_flye.fasta	DTU_2024_1035952_100_SI_LVK_11_SE.fq.gz_flye_contig_12	115388	117031	-	yagW/ecpD	1-1644/1644	===============	0/0	100	99.7	vfdb	NP_286007	(yagW/ecpD) polymerized tip adhesin of ECP fibers [ECP (VF0404)] [Escherichia coli O157:H7 str. EDL933]
DTU_2024_1035952_100_SI_LVK_11_SE.fq.gz_flye.fasta	DTU_2024_1035952_100_SI_LVK_11_SE.fq.gz_flye_contig_12	117021	119546	-	yagX/ecpC	1-2526/2526	===============	0/0	100	99.41	vfdb	NP_286008	(yagX/ecpC) E. coli common pilus usher EcpC [ECP (VF0404)] [Escherichia coli O157:H7 str. EDL933]
DTU_2024_1035952_100_SI_LVK_11_SE.fq.gz_flye.fasta	DTU_2024_1035952_100_SI_LVK_11_SE.fq.gz_flye_contig_12	119572	120240	-	yagY/ecpB	1-669/669	===============	0/0	100	99.25	vfdb	NP_286009	(yagY/ecpB) E. coli common pilus chaperone EcpB [ECP (VF0404)] [Escherichia coli O157:H7 str. EDL933]
DTU_2024_1035952_100_SI_LVK_11_SE.fq.gz_flye.fasta	DTU_2024_1035952_100_SI_LVK_11_SE.fq.gz_flye_contig_12	120298	120885	-	yagZ/ecpA	1-588/588	===============	0/0	100	99.32	vfdb	NP_286010	(yagZ/ecpA) E. coli common pilus structural subunit EcpA [ECP (VF0404)] [Escherichia coli O157:H7 str. EDL933]
DTU_2024_1035952_100_SI_LVK_11_SE.fq.gz_flye.fasta	DTU_2024_1035952_100_SI_LVK_11_SE.fq.gz_flye_contig_12	120960	121550	-	ykgK/ecpR	1-591/591	===============	0/0	100	99.66	vfdb	NP_286011	(ykgK/ecpR) regulator protein EcpR [ECP (VF0404)] [Escherichia coli O157:H7 str. EDL933]
DTU_2024_1035952_100_SI_LVK_11_SE.fq.gz_flye.fasta	DTU_2024_1035952_100_SI_LVK_11_SE.fq.gz_flye_contig_12	130868	135081	+	fdeC	1-4217/4251	========/======	2025-03-01	99.13	92.01	vfdb	YP_002390132	(fdeC) adhesin FdeC [FdeC (VF0506)] [Escherichia coli O45:K1:H7 str. S88]
DTU_2024_1035952_100_SI_LVK_11_SE.fq.gz_flye.fasta	DTU_2024_1035952_100_SI_LVK_11_SE.fq.gz_flye_contig_12	279247	280818	-	espY3	1-1572/1572	===============	0/0	100	98.22	vfdb	NP_286160	(espY3) Type III secretion system effector EspY3 [LEE encoded T3SS (SS020)] [Escherichia coli O157:H7 str. EDL933]
DTU_2024_1035952_100_SI_LVK_11_SE.fq.gz_flye.fasta	DTU_2024_1035952_100_SI_LVK_11_SE.fq.gz_flye_contig_12	518266	520452	-	espL4	1-2187/2187	===============	0/0	100	98.54	vfdb	NP_290644	(espL4) Type III secretion system effector EspL4 [LEE encoded T3SS (SS020)] [Escherichia coli O157:H7 str. EDL933]
DTU_2024_1035952_100_SI_LVK_11_SE.fq.gz_flye.fasta	DTU_2024_1035952_100_SI_LVK_11_SE.fq.gz_flye_contig_12	554911	556491	+	espX4	1-1581/1581	===============	0/0	100	98.17	vfdb	NP_290672	(espX4) Type III secretion system effector EspX4 [LEE encoded T3SS (SS020)] [Escherichia coli O157:H7 str. EDL933]
DTU_2024_1035952_100_SI_LVK_11_SE.fq.gz_flye.fasta	DTU_2024_1035952_100_SI_LVK_11_SE.fq.gz_flye_contig_12	585966	587258	-	espX5	1-1293/1293	===============	0/0	100	97.45	vfdb	NP_290699	(espX5) Type III secretion system effector EspX5 [LEE encoded T3SS (SS020)] [Escherichia coli O157:H7 str. EDL933]
DTU_2024_1035952_100_SI_LVK_11_SE.fq.gz_flye.fasta	DTU_2024_1035952_100_SI_LVK_11_SE.fq.gz_flye_contig_12	872580	873182	+	fimB	1-603/603	===============	0/0	100	97.68	vfdb	NP_757239	(fimB) Type 1 fimbriae Regulatory protein fimB [Type 1 fimbriae (VF0221)] [Escherichia coli CFT073]
DTU_2024_1035952_100_SI_LVK_11_SE.fq.gz_flye.fasta	DTU_2024_1035952_100_SI_LVK_11_SE.fq.gz_flye_contig_12	873660	874256	+	fimE	1-597/597	===============	0/0	100	99.16	vfdb	NP_757240	(fimE) Type 1 fimbriae Regulatory protein fimE [Type 1 fimbriae (VF0221)] [Escherichia coli CFT073]
DTU_2024_1035952_100_SI_LVK_11_SE.fq.gz_flye.fasta	DTU_2024_1035952_100_SI_LVK_11_SE.fq.gz_flye_contig_12	874680	875285	+	fimA	1-606/606	===============	0/0	100	90.92	vfdb	NP_757241	(fimA) Type-1 fimbrial protein A chain precursor [Type 1 fimbriae (VF0221)] [Escherichia coli CFT073]
DTU_2024_1035952_100_SI_LVK_11_SE.fq.gz_flye.fasta	DTU_2024_1035952_100_SI_LVK_11_SE.fq.gz_flye_contig_12	875350	875889	+	fimI	1-540/540	===============	0/0	100	98.89	vfdb	NP_757242	(fimI) Fimbrin-like protein fimI precursor [Type 1 fimbriae (VF0221)] [Escherichia coli CFT073]
DTU_2024_1035952_100_SI_LVK_11_SE.fq.gz_flye.fasta	DTU_2024_1035952_100_SI_LVK_11_SE.fq.gz_flye_contig_12	875926	876651	+	fimC	1-726/726	===============	0/0	100	98.21	vfdb	NP_757243	(fimC) Chaperone protein fimC precursor [Type 1 fimbriae (VF0221)] [Escherichia coli CFT073]
DTU_2024_1035952_100_SI_LVK_11_SE.fq.gz_flye.fasta	DTU_2024_1035952_100_SI_LVK_11_SE.fq.gz_flye_contig_12	876718	879354	+	fimD	1-2637/2637	===============	0/0	100	98.67	vfdb	NP_757244	(fimD) Outer membrane usher protein fimD precursor [Type 1 fimbriae (VF0221)] [Escherichia coli CFT073]
DTU_2024_1035952_100_SI_LVK_11_SE.fq.gz_flye.fasta	DTU_2024_1035952_100_SI_LVK_11_SE.fq.gz_flye_contig_12	879361	879894	+	fimF	1-534/534	===============	0/0	100	97.75	vfdb	NP_757245	(fimF) FimF protein precursor [Type 1 fimbriae (VF0221)] [Escherichia coli CFT073]
DTU_2024_1035952_100_SI_LVK_11_SE.fq.gz_flye.fasta	DTU_2024_1035952_100_SI_LVK_11_SE.fq.gz_flye_contig_12	879907	880410	+	fimG	1-504/504	===============	0/0	100	98.21	vfdb	NP_757247	(fimG) FimG protein precursor [Type 1 fimbriae (VF0221)] [Escherichia coli CFT073]
DTU_2024_1035952_100_SI_LVK_11_SE.fq.gz_flye.fasta	DTU_2024_1035952_100_SI_LVK_11_SE.fq.gz_flye_contig_12	880421	881332	+	fimH	1-912/912	===============	0/0	100	97.7	vfdb	NP_757248	(fimH) FimH protein precursor [Type 1 fimbriae (VF0221)] [Escherichia coli CFT073]
DTU_2024_1035952_100_SI_LVK_11_SE.fq.gz_flye.fasta	DTU_2024_1035952_100_SI_LVK_11_SE.fq.gz_flye_contig_12	993881	995302	-	espX1	1-1422/1422	===============	0/0	100	97.12	vfdb	NP_285716	(espX1) Type III secretion system effector EspX1 [LEE encoded T3SS (SS020)] [Escherichia coli O157:H7 str. EDL933]
DTU_2024_1035952_100_SI_LVK_11_SE.fq.gz_flye.fasta	DTU_2024_1035952_100_SI_LVK_11_SE.fq.gz_flye_contig_12	1034021	1034773	+	espY1	1-753/753	===============	0/0	100	98.41	vfdb	NP_285753	(espY1) Type III secretion system effector EspY1 [LEE encoded T3SS (SS020)] [Escherichia coli O157:H7 str. EDL933]
DTU_2024_1035952_100_SI_LVK_11_SE.fq.gz_flye.fasta	DTU_2024_1035952_100_SI_LVK_11_SE.fq.gz_flye_contig_12	1051212	1051781	+	espY2	1-570/570	===============	0/0	100	98.6	vfdb	NP_285765	(espY2) Type III secretion system effector EspY2 [LEE encoded T3SS (SS020)] [Escherichia coli O157:H7 str. EDL933]
DTU_2024_1035952_100_SI_LVK_11_SE.fq.gz_flye.fasta	DTU_2024_1035952_100_SI_LVK_11_SE.fq.gz_flye_contig_13	6788	7008	+	papI	1-221/234	===============	0/0	94.44	98.64	vfdb	NP_755468	(papI) regulatory protein PapI [P fimbriae (VF0220)] [Escherichia coli CFT073]
DTU_2024_1035952_100_SI_LVK_11_SE.fq.gz_flye.fasta	DTU_2024_1035952_100_SI_LVK_11_SE.fq.gz_flye_contig_13	38228	38650	-	gspM	1-423/423	===============	0/0	100	98.34	vfdb	YP_404609	(gspM) general secretion pathway protein M [T2SS (VF0333)] [Shigella dysenteriae Sd197]
DTU_2024_1035952_100_SI_LVK_11_SE.fq.gz_flye.fasta	DTU_2024_1035952_100_SI_LVK_11_SE.fq.gz_flye_contig_13	38766	39626	-	gspL	1-861/861	===============	0/0	100	97.21	vfdb	YP_404608	(gspL) general secretion pathway protein L [T2SS (VF0333)] [Shigella dysenteriae Sd197]
DTU_2024_1035952_100_SI_LVK_11_SE.fq.gz_flye.fasta	DTU_2024_1035952_100_SI_LVK_11_SE.fq.gz_flye_contig_13	39941	40918	-	gspK	1-978/978	===============	0/0	100	96.22	vfdb	YP_404607	(gspK) general secretion pathway protein K [T2SS (VF0333)] [Shigella dysenteriae Sd197]
DTU_2024_1035952_100_SI_LVK_11_SE.fq.gz_flye.fasta	DTU_2024_1035952_100_SI_LVK_11_SE.fq.gz_flye_contig_13	40915	41484	-	gspJ	1-570/570	===============	0/0	100	94.56	vfdb	YP_404606	(gspJ) general secretion pathway protein J [T2SS (VF0333)] [Shigella dysenteriae Sd197]
DTU_2024_1035952_100_SI_LVK_11_SE.fq.gz_flye.fasta	DTU_2024_1035952_100_SI_LVK_11_SE.fq.gz_flye_contig_13	41517	41888	-	gspI	1-372/372	===============	0/0	100	97.31	vfdb	YP_404605	(gspI) general secretion pathway protein I [T2SS (VF0333)] [Shigella dysenteriae Sd197]
DTU_2024_1035952_100_SI_LVK_11_SE.fq.gz_flye.fasta	DTU_2024_1035952_100_SI_LVK_11_SE.fq.gz_flye_contig_13	41885	42415	-	gspH	1-531/531	===============	0/0	100	98.31	vfdb	YP_404604	(gspH) general secretion pathway protein H [T2SS (VF0333)] [Shigella dysenteriae Sd197]
DTU_2024_1035952_100_SI_LVK_11_SE.fq.gz_flye.fasta	DTU_2024_1035952_100_SI_LVK_11_SE.fq.gz_flye_contig_13	42452	42907	-	gspG	1-456/456	===============	0/0	100	94.96	vfdb	YP_404603	(gspG) general secretion pathway protein G [T2SS (VF0333)] [Shigella dysenteriae Sd197]
DTU_2024_1035952_100_SI_LVK_11_SE.fq.gz_flye.fasta	DTU_2024_1035952_100_SI_LVK_11_SE.fq.gz_flye_contig_13	42948	44147	-	gspF	1-1200/1200	===============	0/0	100	96.08	vfdb	YP_404602	(gspF) general secretion pathway protein F [T2SS (VF0333)] [Shigella dysenteriae Sd197]
DTU_2024_1035952_100_SI_LVK_11_SE.fq.gz_flye.fasta	DTU_2024_1035952_100_SI_LVK_11_SE.fq.gz_flye_contig_13	44147	45640	-	gspE	1-1494/1494	===============	0/0	100	96.45	vfdb	YP_404601	(gspE) general secretion pathway protein E [T2SS (VF0333)] [Shigella dysenteriae Sd197]
DTU_2024_1035952_100_SI_LVK_11_SE.fq.gz_flye.fasta	DTU_2024_1035952_100_SI_LVK_11_SE.fq.gz_flye_contig_13	45640	47490	-	gspD	1-1836/1836	========/======	2015-01-01	100	97.78	vfdb	YP_404600	(gspD) general secretion pathway protein D [T2SS (VF0333)] [Shigella dysenteriae Sd197]
DTU_2024_1035952_100_SI_LVK_11_SE.fq.gz_flye.fasta	DTU_2024_1035952_100_SI_LVK_11_SE.fq.gz_flye_contig_13	47730	48560	-	gspC	1-831/831	===============	0/0	100	97.71	vfdb	YP_404599	(gspC) general secretion pathway protein C [T2SS (VF0333)] [Shigella dysenteriae Sd197]
DTU_2024_1035952_100_SI_LVK_11_SE.fq.gz_flye.fasta	DTU_2024_1035952_100_SI_LVK_11_SE.fq.gz_flye_contig_13	655881	656909	-	shuS	1-1029/1029	===============	0/0	100	98.83	vfdb	YP_405020	(shuS) heme/hemoglobin transport protein ShuS [Shu (VF0256)] [Shigella dysenteriae Sd197]
DTU_2024_1035952_100_SI_LVK_11_SE.fq.gz_flye.fasta	DTU_2024_1035952_100_SI_LVK_11_SE.fq.gz_flye_contig_13	656958	658940	-	shuA	1-1983/1983	===============	0/0	100	99.44	vfdb	YP_405019	(shuA) outer membrane heme/hemoglobin receptor ShuA [Shu (VF0256)] [Shigella dysenteriae Sd197]
DTU_2024_1035952_100_SI_LVK_11_SE.fq.gz_flye.fasta	DTU_2024_1035952_100_SI_LVK_11_SE.fq.gz_flye_contig_13	659545	660537	+	shuT	1-993/993	===============	0/0	100	98.89	vfdb	YP_405017	(shuT) periplasmic binding protein ShuT [Shu (VF0256)] [Shigella dysenteriae Sd197]
DTU_2024_1035952_100_SI_LVK_11_SE.fq.gz_flye.fasta	DTU_2024_1035952_100_SI_LVK_11_SE.fq.gz_flye_contig_13	660557	661894	+	chuW	1-1338/1338	===============	0/0	100	96.64	vfdb	NP_756176	(chuW) Putative oxygen independent coproporphyrinogen III oxidase [Chu (VF0227)] [Escherichia coli CFT073]
DTU_2024_1035952_100_SI_LVK_11_SE.fq.gz_flye.fasta	DTU_2024_1035952_100_SI_LVK_11_SE.fq.gz_flye_contig_13	661907	662401	+	shuX	1-495/495	===============	0/0	100	98.59	vfdb	YP_405016	(shuX) shu locus protein ShuX [Shu (VF0256)] [Shigella dysenteriae Sd197]
DTU_2024_1035952_100_SI_LVK_11_SE.fq.gz_flye.fasta	DTU_2024_1035952_100_SI_LVK_11_SE.fq.gz_flye_contig_13	662401	663024	+	chuY	1-624/624	===============	0/0	100	97.28	vfdb	NP_756178	(chuY) ChuY [Chu (VF0227)] [Escherichia coli CFT073]
DTU_2024_1035952_100_SI_LVK_11_SE.fq.gz_flye.fasta	DTU_2024_1035952_100_SI_LVK_11_SE.fq.gz_flye_contig_13	663073	664065	+	chuU	1-993/993	===============	0/0	100	98.89	vfdb	NP_756179	(chuU) heme permease protein ChuU [Chu (VF0227)] [Escherichia coli CFT073]
DTU_2024_1035952_100_SI_LVK_11_SE.fq.gz_flye.fasta	DTU_2024_1035952_100_SI_LVK_11_SE.fq.gz_flye_contig_13	664032	664832	+	chuV	1-801/801	===============	0/0	100	98.25	vfdb	NP_756180	(chuV) ATP-binding hydrophilic protein ChuV [Chu (VF0227)] [Escherichia coli CFT073]
DTU_2024_1035952_100_SI_LVK_11_SE.fq.gz_flye.fasta	DTU_2024_1035952_100_SI_LVK_11_SE.fq.gz_flye_contig_13	935832	938240	-	espY4	1-2409/2409	===============	0/0	100	96.64	vfdb	NP_290352	(espY4) Type III secretion system effector EspY4 [LEE encoded T3SS (SS020)] [Escherichia coli O157:H7 str. EDL933]
DTU_2024_1035952_100_SI_LVK_11_SE.fq.gz_flye.fasta	DTU_2024_1035952_100_SI_LVK_11_SE.fq.gz_flye_contig_13	1027471	1028899	-	aslA	1-1428/1428	========/======	2025-01-01	100	93.56	vfdb	AAG10151	(aslA) putative arylsulfatase [AslA (VF0238)] [Escherichia coli O18:K1:H7 str. RS218]
DTU_2024_1035952_100_SI_LVK_11_SE.fq.gz_flye.fasta	DTU_2024_1035952_100_SI_LVK_11_SE.fq.gz_flye_contig_15	525345	526400	+	ompA	1-1041/1041	========/======	2015-02-01	100	95.27	vfdb	AAF37887	(ompA) outer membrane protein A [OmpA (VF0236)] [Escherichia coli O18:K1:H7 str. RS218]
DTU_2024_1035952_100_SI_LVK_11_SE.fq.gz_flye.fasta	DTU_2024_1035952_100_SI_LVK_11_SE.fq.gz_flye_contig_2	59175	59945	-	entD	1-771/771	===============	0/0	100	94.16	vfdb	NP_752599	(entD) phosphopantetheinyl transferase component of enterobactin synthase multienzyme complex [Enterobactin (VF0228)] [Escherichia coli CFT073]
DTU_2024_1035952_100_SI_LVK_11_SE.fq.gz_flye.fasta	DTU_2024_1035952_100_SI_LVK_11_SE.fq.gz_flye_contig_2	59970	62210	-	fepA	1-2241/2241	===============	0/0	100	96.39	vfdb	NP_752600	(fepA) ferrienterobactin outer membrane transporter [Enterobactin (VF0228)] [Escherichia coli CFT073]
DTU_2024_1035952_100_SI_LVK_11_SE.fq.gz_flye.fasta	DTU_2024_1035952_100_SI_LVK_11_SE.fq.gz_flye_contig_2	62453	63655	+	fes	1-1203/1203	===============	0/0	100	97.01	vfdb	NP_752602	(fes) enterobactin/ferric enterobactin esterase [enterobactin (IA019)] [Escherichia coli CFT073]
DTU_2024_1035952_100_SI_LVK_11_SE.fq.gz_flye.fasta	DTU_2024_1035952_100_SI_LVK_11_SE.fq.gz_flye_contig_2	63873	67726	+	entF	1-3854/3882	========/======	2025-02-02	99.25	95.49	vfdb	NP_752604	(entF) enterobactin synthase multienzyme complex component ATP-dependent [Enterobactin (VF0228)] [Escherichia coli CFT073]
DTU_2024_1035952_100_SI_LVK_11_SE.fq.gz_flye.fasta	DTU_2024_1035952_100_SI_LVK_11_SE.fq.gz_flye_contig_2	69100	69915	-	fepC	1-816/816	===============	0/0	100	96.57	vfdb	NP_752606	(fepC) ferrienterobactin ABC transporter ATPase [Enterobactin (VF0228)] [Escherichia coli CFT073]
DTU_2024_1035952_100_SI_LVK_11_SE.fq.gz_flye.fasta	DTU_2024_1035952_100_SI_LVK_11_SE.fq.gz_flye_contig_2	69912	70904	-	fepG	1-993/993	===============	0/0	100	94.46	vfdb	NP_752607	(fepG) iron-enterobactin ABC transporter permease [Enterobactin (VF0228)] [Escherichia coli CFT073]
DTU_2024_1035952_100_SI_LVK_11_SE.fq.gz_flye.fasta	DTU_2024_1035952_100_SI_LVK_11_SE.fq.gz_flye_contig_2	70901	71917	-	fepD	1-1017/1017	===============	0/0	100	96.07	vfdb	NP_752608	(fepD) ferrienterobactin ABC transporter permease [Enterobactin (VF0228)] [Escherichia coli CFT073]
DTU_2024_1035952_100_SI_LVK_11_SE.fq.gz_flye.fasta	DTU_2024_1035952_100_SI_LVK_11_SE.fq.gz_flye_contig_2	72016	73265	+	entS	1-1250/1251	===============	0/0	99.92	96	vfdb	NP_752609	(entS) enterobactin exporter iron-regulated [enterobactin (IA019)] [Escherichia coli CFT073]
DTU_2024_1035952_100_SI_LVK_11_SE.fq.gz_flye.fasta	DTU_2024_1035952_100_SI_LVK_11_SE.fq.gz_flye_contig_2	73356	74312	-	fepB	1-957/957	===============	0/0	100	96.66	vfdb	NP_752610	(fepB) ferrienterobactin ABC transporter periplasmic binding protein [Enterobactin (VF0228)] [Escherichia coli CFT073]
DTU_2024_1035952_100_SI_LVK_11_SE.fq.gz_flye.fasta	DTU_2024_1035952_100_SI_LVK_11_SE.fq.gz_flye_contig_2	74489	75676	+	entC	1-1188/1188	===============	0/0	100	98.23	vfdb	NP_752611	(entC) isochorismate synthase 1 [Enterobactin (VF0228)] [Escherichia coli CFT073]
DTU_2024_1035952_100_SI_LVK_11_SE.fq.gz_flye.fasta	DTU_2024_1035952_100_SI_LVK_11_SE.fq.gz_flye_contig_2	75686	77296	+	entE	1-1611/1611	===============	0/0	100	95.41	vfdb	NP_752612	(entE) 23-dihydroxybenzoate-AMP ligase component of enterobactin synthase multienzyme complex [Enterobactin (VF0228)] [Escherichia coli CFT073]
DTU_2024_1035952_100_SI_LVK_11_SE.fq.gz_flye.fasta	DTU_2024_1035952_100_SI_LVK_11_SE.fq.gz_flye_contig_2	77310	78167	+	entB	1-858/858	===============	0/0	100	98.02	vfdb	NP_752613	(entB) isochorismatase [Enterobactin (VF0228)] [Escherichia coli CFT073]
DTU_2024_1035952_100_SI_LVK_11_SE.fq.gz_flye.fasta	DTU_2024_1035952_100_SI_LVK_11_SE.fq.gz_flye_contig_2	78167	78913	+	entA	1-747/747	===============	0/0	100	94.78	vfdb	NP_752614	(entA) 23-dihydro-23-dihydroxybenzoate dehydrogenase [Enterobactin (VF0228)] [Escherichia coli CFT073]
DTU_2024_1035952_100_SI_LVK_11_SE.fq.gz_flye.fasta	DTU_2024_1035952_100_SI_LVK_11_SE.fq.gz_flye_contig_2	282628	284640	+	espX2	1-2013/2013	===============	0/0	100	98.56	vfdb	NP_286562	(espX2) Type III secretion system effector EspX2 [LEE encoded T3SS (SS020)] [Escherichia coli O157:H7 str. EDL933]
DTU_2024_1035952_100_SI_LVK_11_SE.fq.gz_flye.fasta	DTU_2024_1035952_100_SI_LVK_11_SE.fq.gz_flye_contig_21	16902	18154	-	espR1	1-1253/1260	===============	0/0	99.44	97.92	vfdb	NP_287686	(espR1) Type III secretion system effector espR1 [LEE encoded T3SS (SS020)] [Escherichia coli O157:H7 str. EDL933]
DTU_2024_1035952_100_SI_LVK_11_SE.fq.gz_flye.fasta	DTU_2024_1035952_100_SI_LVK_11_SE.fq.gz_flye_contig_30	328064	329074	-	papG	1-1011/1011	===============	0/0	100	99.01	vfdb	NP_755458	(papG) P pilus tip adhesin PapG [P fimbriae (VF0220)] [Escherichia coli CFT073]
DTU_2024_1035952_100_SI_LVK_11_SE.fq.gz_flye.fasta	DTU_2024_1035952_100_SI_LVK_11_SE.fq.gz_flye_contig_30	329118	329648	-	papF	1-531/531	===============	0/0	100	98.68	vfdb	NP_755459	(papF) P pilus minor subunit PapF [P fimbriae (VF0220)] [Escherichia coli CFT073]
DTU_2024_1035952_100_SI_LVK_11_SE.fq.gz_flye.fasta	DTU_2024_1035952_100_SI_LVK_11_SE.fq.gz_flye_contig_30	329693	330232	-	papE	1-540/540	===============	0/0	100	94.26	vfdb	NP_755460	(papE) P pilus minor subunit PapE [P fimbriae (VF0220)] [Escherichia coli CFT073]
DTU_2024_1035952_100_SI_LVK_11_SE.fq.gz_flye.fasta	DTU_2024_1035952_100_SI_LVK_11_SE.fq.gz_flye_contig_30	330241	330780	-	papK	1-540/540	===============	0/0	100	99.44	vfdb	NP_755461	(papK) P pilus minor subunit PapK [P fimbriae (VF0220)] [Escherichia coli CFT073]
DTU_2024_1035952_100_SI_LVK_11_SE.fq.gz_flye.fasta	DTU_2024_1035952_100_SI_LVK_11_SE.fq.gz_flye_contig_30	330787	331368	-	papJ	1-582/582	===============	0/0	100	98.11	vfdb	NP_755463	(papJ) P pilus assembly protein PapJ [P fimbriae (VF0220)] [Escherichia coli CFT073]
DTU_2024_1035952_100_SI_LVK_11_SE.fq.gz_flye.fasta	DTU_2024_1035952_100_SI_LVK_11_SE.fq.gz_flye_contig_30	331405	332010	-	papD	1-606/606	===============	0/0	100	99.5	vfdb	NP_755464	(papD) chaperone protein PapD [P fimbriae (VF0220)] [Escherichia coli CFT073]
DTU_2024_1035952_100_SI_LVK_11_SE.fq.gz_flye.fasta	DTU_2024_1035952_100_SI_LVK_11_SE.fq.gz_flye_contig_31	1	2378	-	papC	1-2378/2523	===============	0/0	94.25	99.24	vfdb	NP_755465	(papC) usher protein PapC [P fimbriae (VF0220)] [Escherichia coli CFT073]
DTU_2024_1035952_100_SI_LVK_11_SE.fq.gz_flye.fasta	DTU_2024_1035952_100_SI_LVK_11_SE.fq.gz_flye_contig_31	2425	2962	-	papH	50-588/588	.=======/======	2025-01-01	91.5	97.22	vfdb	NP_755466	(papH) P pilus termination subunit PapH [P fimbriae (VF0220)] [Escherichia coli CFT073]
DTU_2024_1035954_100_SI_LVK_43_SE.fq.gz_flye.fasta	DTU_2024_1035954_100_SI_LVK_43_SE.fq.gz_flye_contig_1	368202	369230	-	shuS	1-1029/1029	===============	0/0	100	98.64	vfdb	YP_405020	(shuS) heme/hemoglobin transport protein ShuS [Shu (VF0256)] [Shigella dysenteriae Sd197]
DTU_2024_1035954_100_SI_LVK_43_SE.fq.gz_flye.fasta	DTU_2024_1035954_100_SI_LVK_43_SE.fq.gz_flye_contig_1	369279	371261	-	shuA	1-1983/1983	===============	0/0	100	99.44	vfdb	YP_405019	(shuA) outer membrane heme/hemoglobin receptor ShuA [Shu (VF0256)] [Shigella dysenteriae Sd197]
DTU_2024_1035954_100_SI_LVK_43_SE.fq.gz_flye.fasta	DTU_2024_1035954_100_SI_LVK_43_SE.fq.gz_flye_contig_1	371866	372858	+	shuT	1-993/993	===============	0/0	100	98.39	vfdb	YP_405017	(shuT) periplasmic binding protein ShuT [Shu (VF0256)] [Shigella dysenteriae Sd197]
DTU_2024_1035954_100_SI_LVK_43_SE.fq.gz_flye.fasta	DTU_2024_1035954_100_SI_LVK_43_SE.fq.gz_flye_contig_1	372878	374215	+	chuW	1-1338/1338	===============	0/0	100	96.11	vfdb	NP_756176	(chuW) Putative oxygen independent coproporphyrinogen III oxidase [Chu (VF0227)] [Escherichia coli CFT073]
DTU_2024_1035954_100_SI_LVK_43_SE.fq.gz_flye.fasta	DTU_2024_1035954_100_SI_LVK_43_SE.fq.gz_flye_contig_1	374228	374722	+	shuX	1-495/495	===============	0/0	100	98.79	vfdb	YP_405016	(shuX) shu locus protein ShuX [Shu (VF0256)] [Shigella dysenteriae Sd197]
DTU_2024_1035954_100_SI_LVK_43_SE.fq.gz_flye.fasta	DTU_2024_1035954_100_SI_LVK_43_SE.fq.gz_flye_contig_1	374722	375345	+	shuY	1-624/624	===============	0/0	100	99.04	vfdb	YP_405015	(shuY) shu locus protein ShuY [Shu (VF0256)] [Shigella dysenteriae Sd197]
DTU_2024_1035954_100_SI_LVK_43_SE.fq.gz_flye.fasta	DTU_2024_1035954_100_SI_LVK_43_SE.fq.gz_flye_contig_1	375396	376388	+	chuU	1-993/993	===============	0/0	100	98.39	vfdb	NP_756179	(chuU) heme permease protein ChuU [Chu (VF0227)] [Escherichia coli CFT073]
DTU_2024_1035954_100_SI_LVK_43_SE.fq.gz_flye.fasta	DTU_2024_1035954_100_SI_LVK_43_SE.fq.gz_flye_contig_1	376355	377155	+	chuV	1-801/801	===============	0/0	100	98.13	vfdb	NP_756180	(chuV) ATP-binding hydrophilic protein ChuV [Chu (VF0227)] [Escherichia coli CFT073]
DTU_2024_1035954_100_SI_LVK_43_SE.fq.gz_flye.fasta	DTU_2024_1035954_100_SI_LVK_43_SE.fq.gz_flye_contig_1	646193	648601	-	espY4	1-2409/2409	===============	0/0	100	96.68	vfdb	NP_290352	(espY4) Type III secretion system effector EspY4 [LEE encoded T3SS (SS020)] [Escherichia coli O157:H7 str. EDL933]
DTU_2024_1035954_100_SI_LVK_43_SE.fq.gz_flye.fasta	DTU_2024_1035954_100_SI_LVK_43_SE.fq.gz_flye_contig_1	737138	738566	-	aslA	1-1428/1428	========/======	2025-01-01	100	93.98	vfdb	AAG10151	(aslA) putative arylsulfatase [AslA (VF0238)] [Escherichia coli O18:K1:H7 str. RS218]
DTU_2024_1035954_100_SI_LVK_43_SE.fq.gz_flye.fasta	DTU_2024_1035954_100_SI_LVK_43_SE.fq.gz_flye_contig_1	980706	982892	-	espL4	1-2187/2187	===============	0/0	100	98.99	vfdb	NP_290644	(espL4) Type III secretion system effector EspL4 [LEE encoded T3SS (SS020)] [Escherichia coli O157:H7 str. EDL933]
DTU_2024_1035954_100_SI_LVK_43_SE.fq.gz_flye.fasta	DTU_2024_1035954_100_SI_LVK_43_SE.fq.gz_flye_contig_1	1017351	1018931	+	espX4	1-1581/1581	===============	0/0	100	98.23	vfdb	NP_290672	(espX4) Type III secretion system effector EspX4 [LEE encoded T3SS (SS020)] [Escherichia coli O157:H7 str. EDL933]
DTU_2024_1035954_100_SI_LVK_43_SE.fq.gz_flye.fasta	DTU_2024_1035954_100_SI_LVK_43_SE.fq.gz_flye_contig_1	1061188	1062480	-	espX5	1-1293/1293	===============	0/0	100	97.45	vfdb	NP_290699	(espX5) Type III secretion system effector EspX5 [LEE encoded T3SS (SS020)] [Escherichia coli O157:H7 str. EDL933]
DTU_2024_1035954_100_SI_LVK_43_SE.fq.gz_flye.fasta	DTU_2024_1035954_100_SI_LVK_43_SE.fq.gz_flye_contig_1	1157182	1157298	+	astA	1-117/117	===============	0/0	100	98.29	vfdb	BAA94855	(astA) heat-stable enterotoxin 1 [EAST1 (VF0216)] [Escherichia coli O44:H18 042]
DTU_2024_1035954_100_SI_LVK_43_SE.fq.gz_flye.fasta	DTU_2024_1035954_100_SI_LVK_43_SE.fq.gz_flye_contig_1	1357003	1357605	+	fimB	1-603/603	===============	0/0	100	97.68	vfdb	NP_757239	(fimB) Type 1 fimbriae Regulatory protein fimB [Type 1 fimbriae (VF0221)] [Escherichia coli CFT073]
DTU_2024_1035954_100_SI_LVK_43_SE.fq.gz_flye.fasta	DTU_2024_1035954_100_SI_LVK_43_SE.fq.gz_flye_contig_1	1358083	1358679	+	fimE	1-597/597	===============	0/0	100	98.49	vfdb	NP_757240	(fimE) Type 1 fimbriae Regulatory protein fimE [Type 1 fimbriae (VF0221)] [Escherichia coli CFT073]
DTU_2024_1035954_100_SI_LVK_43_SE.fq.gz_flye.fasta	DTU_2024_1035954_100_SI_LVK_43_SE.fq.gz_flye_contig_1	1359104	1359709	+	fimA	1-606/606	===============	0/0	100	90.92	vfdb	NP_757241	(fimA) Type-1 fimbrial protein A chain precursor [Type 1 fimbriae (VF0221)] [Escherichia coli CFT073]
DTU_2024_1035954_100_SI_LVK_43_SE.fq.gz_flye.fasta	DTU_2024_1035954_100_SI_LVK_43_SE.fq.gz_flye_contig_1	1359774	1360313	+	fimI	1-540/540	===============	0/0	100	99.07	vfdb	NP_757242	(fimI) Fimbrin-like protein fimI precursor [Type 1 fimbriae (VF0221)] [Escherichia coli CFT073]
DTU_2024_1035954_100_SI_LVK_43_SE.fq.gz_flye.fasta	DTU_2024_1035954_100_SI_LVK_43_SE.fq.gz_flye_contig_1	1360350	1361075	+	fimC	1-726/726	===============	0/0	100	98.35	vfdb	NP_757243	(fimC) Chaperone protein fimC precursor [Type 1 fimbriae (VF0221)] [Escherichia coli CFT073]
DTU_2024_1035954_100_SI_LVK_43_SE.fq.gz_flye.fasta	DTU_2024_1035954_100_SI_LVK_43_SE.fq.gz_flye_contig_1	1361141	1363777	+	fimD	1-2637/2637	===============	0/0	100	98.75	vfdb	NP_757244	(fimD) Outer membrane usher protein fimD precursor [Type 1 fimbriae (VF0221)] [Escherichia coli CFT073]
DTU_2024_1035954_100_SI_LVK_43_SE.fq.gz_flye.fasta	DTU_2024_1035954_100_SI_LVK_43_SE.fq.gz_flye_contig_1	1363784	1364317	+	fimF	1-534/534	===============	0/0	100	97.19	vfdb	NP_757245	(fimF) FimF protein precursor [Type 1 fimbriae (VF0221)] [Escherichia coli CFT073]
DTU_2024_1035954_100_SI_LVK_43_SE.fq.gz_flye.fasta	DTU_2024_1035954_100_SI_LVK_43_SE.fq.gz_flye_contig_1	1364330	1364833	+	fimG	1-504/504	===============	0/0	100	98.21	vfdb	NP_757247	(fimG) FimG protein precursor [Type 1 fimbriae (VF0221)] [Escherichia coli CFT073]
DTU_2024_1035954_100_SI_LVK_43_SE.fq.gz_flye.fasta	DTU_2024_1035954_100_SI_LVK_43_SE.fq.gz_flye_contig_1	1364844	1365755	+	fimH	1-912/912	===============	0/0	100	97.59	vfdb	NP_757248	(fimH) FimH protein precursor [Type 1 fimbriae (VF0221)] [Escherichia coli CFT073]
DTU_2024_1035954_100_SI_LVK_43_SE.fq.gz_flye.fasta	DTU_2024_1035954_100_SI_LVK_43_SE.fq.gz_flye_contig_1	1535270	1536691	-	espX1	1-1422/1422	===============	0/0	100	96.41	vfdb	NP_285716	(espX1) Type III secretion system effector EspX1 [LEE encoded T3SS (SS020)] [Escherichia coli O157:H7 str. EDL933]
DTU_2024_1035954_100_SI_LVK_43_SE.fq.gz_flye.fasta	DTU_2024_1035954_100_SI_LVK_43_SE.fq.gz_flye_contig_1	1591225	1591794	+	espY2	1-570/570	===============	0/0	100	98.07	vfdb	NP_285765	(espY2) Type III secretion system effector EspY2 [LEE encoded T3SS (SS020)] [Escherichia coli O157:H7 str. EDL933]
DTU_2024_1035954_100_SI_LVK_43_SE.fq.gz_flye.fasta	DTU_2024_1035954_100_SI_LVK_43_SE.fq.gz_flye_contig_1	1869498	1870253	-	yagV/ecpE	1-756/756	===============	0/0	100	97.22	vfdb	NP_286006	(yagV/ecpE) E. coli common pilus chaperone EcpE [ECP (VF0404)] [Escherichia coli O157:H7 str. EDL933]
DTU_2024_1035954_100_SI_LVK_43_SE.fq.gz_flye.fasta	DTU_2024_1035954_100_SI_LVK_43_SE.fq.gz_flye_contig_1	1870177	1871820	-	yagW/ecpD	1-1644/1644	===============	0/0	100	97.69	vfdb	NP_286007	(yagW/ecpD) polymerized tip adhesin of ECP fibers [ECP (VF0404)] [Escherichia coli O157:H7 str. EDL933]
DTU_2024_1035954_100_SI_LVK_43_SE.fq.gz_flye.fasta	DTU_2024_1035954_100_SI_LVK_43_SE.fq.gz_flye_contig_1	1871810	1874335	-	yagX/ecpC	1-2526/2526	===============	0/0	100	99.72	vfdb	NP_286008	(yagX/ecpC) E. coli common pilus usher EcpC [ECP (VF0404)] [Escherichia coli O157:H7 str. EDL933]
DTU_2024_1035954_100_SI_LVK_43_SE.fq.gz_flye.fasta	DTU_2024_1035954_100_SI_LVK_43_SE.fq.gz_flye_contig_1	1874361	1875029	-	yagY/ecpB	1-669/669	===============	0/0	100	98.8	vfdb	NP_286009	(yagY/ecpB) E. coli common pilus chaperone EcpB [ECP (VF0404)] [Escherichia coli O157:H7 str. EDL933]
DTU_2024_1035954_100_SI_LVK_43_SE.fq.gz_flye.fasta	DTU_2024_1035954_100_SI_LVK_43_SE.fq.gz_flye_contig_1	1875087	1875674	-	yagZ/ecpA	1-588/588	===============	0/0	100	99.15	vfdb	NP_286010	(yagZ/ecpA) E. coli common pilus structural subunit EcpA [ECP (VF0404)] [Escherichia coli O157:H7 str. EDL933]
DTU_2024_1035954_100_SI_LVK_43_SE.fq.gz_flye.fasta	DTU_2024_1035954_100_SI_LVK_43_SE.fq.gz_flye_contig_1	1875748	1876338	-	ykgK/ecpR	1-591/591	===============	0/0	100	99.66	vfdb	NP_286011	(ykgK/ecpR) regulator protein EcpR [ECP (VF0404)] [Escherichia coli O157:H7 str. EDL933]
DTU_2024_1035954_100_SI_LVK_43_SE.fq.gz_flye.fasta	DTU_2024_1035954_100_SI_LVK_43_SE.fq.gz_flye_contig_1	1884082	1888323	+	fdeC	1-4245/4251	========/======	2025-05-03	99.76	92.2	vfdb	YP_002390132	(fdeC) adhesin FdeC [FdeC (VF0506)] [Escherichia coli O45:K1:H7 str. S88]
DTU_2024_1035954_100_SI_LVK_43_SE.fq.gz_flye.fasta	DTU_2024_1035954_100_SI_LVK_43_SE.fq.gz_flye_contig_1	2021442	2023013	-	espY3	1-1572/1572	===============	0/0	100	99.75	vfdb	NP_286160	(espY3) Type III secretion system effector EspY3 [LEE encoded T3SS (SS020)] [Escherichia coli O157:H7 str. EDL933]
DTU_2024_1035954_100_SI_LVK_43_SE.fq.gz_flye.fasta	DTU_2024_1035954_100_SI_LVK_43_SE.fq.gz_flye_contig_1	2192068	2192838	-	entD	1-771/771	===============	0/0	100	94.29	vfdb	NP_752599	(entD) phosphopantetheinyl transferase component of enterobactin synthase multienzyme complex [Enterobactin (VF0228)] [Escherichia coli CFT073]
DTU_2024_1035954_100_SI_LVK_43_SE.fq.gz_flye.fasta	DTU_2024_1035954_100_SI_LVK_43_SE.fq.gz_flye_contig_1	2192863	2195103	-	fepA	1-2241/2241	===============	0/0	100	97.19	vfdb	NP_752600	(fepA) ferrienterobactin outer membrane transporter [Enterobactin (VF0228)] [Escherichia coli CFT073]
DTU_2024_1035954_100_SI_LVK_43_SE.fq.gz_flye.fasta	DTU_2024_1035954_100_SI_LVK_43_SE.fq.gz_flye_contig_1	2195346	2196548	+	fes	1-1203/1203	===============	0/0	100	96.84	vfdb	NP_752602	(fes) enterobactin/ferric enterobactin esterase [enterobactin (IA019)] [Escherichia coli CFT073]
DTU_2024_1035954_100_SI_LVK_43_SE.fq.gz_flye.fasta	DTU_2024_1035954_100_SI_LVK_43_SE.fq.gz_flye_contig_1	2196766	2200619	+	entF	1-3854/3882	========/======	2025-02-02	99.25	96.06	vfdb	NP_752604	(entF) enterobactin synthase multienzyme complex component ATP-dependent [Enterobactin (VF0228)] [Escherichia coli CFT073]
DTU_2024_1035954_100_SI_LVK_43_SE.fq.gz_flye.fasta	DTU_2024_1035954_100_SI_LVK_43_SE.fq.gz_flye_contig_1	2201993	2202808	-	fepC	1-816/816	===============	0/0	100	96.08	vfdb	NP_752606	(fepC) ferrienterobactin ABC transporter ATPase [Enterobactin (VF0228)] [Escherichia coli CFT073]
DTU_2024_1035954_100_SI_LVK_43_SE.fq.gz_flye.fasta	DTU_2024_1035954_100_SI_LVK_43_SE.fq.gz_flye_contig_1	2202805	2203797	-	fepG	1-993/993	===============	0/0	100	95.06	vfdb	NP_752607	(fepG) iron-enterobactin ABC transporter permease [Enterobactin (VF0228)] [Escherichia coli CFT073]
DTU_2024_1035954_100_SI_LVK_43_SE.fq.gz_flye.fasta	DTU_2024_1035954_100_SI_LVK_43_SE.fq.gz_flye_contig_1	2203794	2204810	-	fepD	1-1017/1017	===============	0/0	100	95.97	vfdb	NP_752608	(fepD) ferrienterobactin ABC transporter permease [Enterobactin (VF0228)] [Escherichia coli CFT073]
DTU_2024_1035954_100_SI_LVK_43_SE.fq.gz_flye.fasta	DTU_2024_1035954_100_SI_LVK_43_SE.fq.gz_flye_contig_1	2204909	2206159	+	entS	1-1251/1251	===============	0/0	100	96.16	vfdb	NP_752609	(entS) enterobactin exporter iron-regulated [enterobactin (IA019)] [Escherichia coli CFT073]
DTU_2024_1035954_100_SI_LVK_43_SE.fq.gz_flye.fasta	DTU_2024_1035954_100_SI_LVK_43_SE.fq.gz_flye_contig_1	2206163	2207119	-	fepB	1-957/957	===============	0/0	100	98.22	vfdb	NP_752610	(fepB) ferrienterobactin ABC transporter periplasmic binding protein [Enterobactin (VF0228)] [Escherichia coli CFT073]
DTU_2024_1035954_100_SI_LVK_43_SE.fq.gz_flye.fasta	DTU_2024_1035954_100_SI_LVK_43_SE.fq.gz_flye_contig_1	2207296	2208483	+	entC	1-1188/1188	===============	0/0	100	98.06	vfdb	NP_752611	(entC) isochorismate synthase 1 [Enterobactin (VF0228)] [Escherichia coli CFT073]
DTU_2024_1035954_100_SI_LVK_43_SE.fq.gz_flye.fasta	DTU_2024_1035954_100_SI_LVK_43_SE.fq.gz_flye_contig_1	2208493	2210103	+	entE	1-1611/1611	===============	0/0	100	96.15	vfdb	NP_752612	(entE) 23-dihydroxybenzoate-AMP ligase component of enterobactin synthase multienzyme complex [Enterobactin (VF0228)] [Escherichia coli CFT073]
DTU_2024_1035954_100_SI_LVK_43_SE.fq.gz_flye.fasta	DTU_2024_1035954_100_SI_LVK_43_SE.fq.gz_flye_contig_1	2210117	2210974	+	entB	1-858/858	===============	0/0	100	97.67	vfdb	NP_752613	(entB) isochorismatase [Enterobactin (VF0228)] [Escherichia coli CFT073]
DTU_2024_1035954_100_SI_LVK_43_SE.fq.gz_flye.fasta	DTU_2024_1035954_100_SI_LVK_43_SE.fq.gz_flye_contig_1	2210974	2211720	+	entA	1-747/747	===============	0/0	100	94.91	vfdb	NP_752614	(entA) 23-dihydro-23-dihydroxybenzoate dehydrogenase [Enterobactin (VF0228)] [Escherichia coli CFT073]
DTU_2024_1035954_100_SI_LVK_43_SE.fq.gz_flye.fasta	DTU_2024_1035954_100_SI_LVK_43_SE.fq.gz_flye_contig_3	177692	178831	+	espR4	1-1140/1140	===============	0/0	100	96.23	vfdb	NP_288396	(espR4) Type III secretion system effector espR4 [LEE encoded T3SS (SS020)] [Escherichia coli O157:H7 str. EDL933]
DTU_2024_1035954_100_SI_LVK_43_SE.fq.gz_flye.fasta	DTU_2024_1035954_100_SI_LVK_43_SE.fq.gz_flye_contig_3	179650	180789	+	espR4	1-1140/1140	===============	0/0	100	93.77	vfdb	NP_288396	(espR4) Type III secretion system effector espR4 [LEE encoded T3SS (SS020)] [Escherichia coli O157:H7 str. EDL933]
DTU_2024_1035954_100_SI_LVK_43_SE.fq.gz_flye.fasta	DTU_2024_1035954_100_SI_LVK_43_SE.fq.gz_flye_contig_3	386481	388379	-	espL1	1-1899/1899	===============	0/0	100	96.79	vfdb	NP_288154	(espL1) Type III secretion system effector espL1 [LEE encoded T3SS (SS020)] [Escherichia coli O157:H7 str. EDL933]
DTU_2024_1035954_100_SI_LVK_43_SE.fq.gz_flye.fasta	DTU_2024_1035954_100_SI_LVK_43_SE.fq.gz_flye_contig_3	695671	696921	+	espR1	1-1251/1260	===============	0/0	99.29	96.32	vfdb	NP_287686	(espR1) Type III secretion system effector espR1 [LEE encoded T3SS (SS020)] [Escherichia coli O157:H7 str. EDL933]
DTU_2024_1035954_100_SI_LVK_43_SE.fq.gz_flye.fasta	DTU_2024_1035954_100_SI_LVK_43_SE.fq.gz_flye_contig_3	1195099	1196151	+	ompA	1-1041/1041	========/======	2025-12-01	100	94.59	vfdb	AAF37887	(ompA) outer membrane protein A [OmpA (VF0236)] [Escherichia coli O18:K1:H7 str. RS218]
DTU_2024_1035954_100_SI_LVK_43_SE.fq.gz_flye.fasta	DTU_2024_1035954_100_SI_LVK_43_SE.fq.gz_flye_contig_3	1387435	1389447	-	espX2	1-2013/2013	===============	0/0	100	98.36	vfdb	NP_286562	(espX2) Type III secretion system effector EspX2 [LEE encoded T3SS (SS020)] [Escherichia coli O157:H7 str. EDL933]
DTU_2024_1035954_100_SI_LVK_43_SE.fq.gz_flye.fasta	DTU_2024_1035954_100_SI_LVK_43_SE.fq.gz_flye_contig_5	1894	4968	+	hlyA	1-3075/3075	===============	0/0	100	96.94	vfdb	NP_755445	(hlyA) Hemolysin A [Hemolysin (VF0225)] [Escherichia coli CFT073]
DTU_2024_1035954_100_SI_LVK_43_SE.fq.gz_flye.fasta	DTU_2024_1035954_100_SI_LVK_43_SE.fq.gz_flye_contig_5	5040	7163	+	hlyB	1-2124/2124	===============	0/0	100	98.16	vfdb	NP_755448	(hlyB) Hemolysin B [Hemolysin (VF0225)] [Escherichia coli CFT073]
DTU_2024_1035954_100_SI_LVK_43_SE.fq.gz_flye.fasta	DTU_2024_1035954_100_SI_LVK_43_SE.fq.gz_flye_contig_5	7182	8618	+	hlyD	1-1437/1437	===============	0/0	100	96.8	vfdb	NP_755449	(hlyD) Hemolysin D [Hemolysin (VF0225)] [Escherichia coli CFT073]
DTU_2024_1035954_100_SI_LVK_43_SE.fq.gz_flye.fasta	DTU_2024_1035954_100_SI_LVK_43_SE.fq.gz_flye_contig_5	123019	123237	-	estIa	1-219/219	===============	0/0	100	100	vfdb	YP_003294006	(estIa) heat stable enterotoxin I [Heat-stable toxin (ST) (VF0211)] [Escherichia coli O78:H11:K80 str. H10407]
DTU_2024_1035954_100_SI_LVK_43_SE.fq.gz_flye.fasta	DTU_2024_1035954_100_SI_LVK_43_SE.fq.gz_flye_contig_6	179230	180060	+	gspC	1-831/831	===============	0/0	100	96.39	vfdb	YP_404599	(gspC) general secretion pathway protein C [T2SS (VF0333)] [Shigella dysenteriae Sd197]
DTU_2024_1035954_100_SI_LVK_43_SE.fq.gz_flye.fasta	DTU_2024_1035954_100_SI_LVK_43_SE.fq.gz_flye_contig_6	180300	182150	+	gspD	1-1836/1836	========/======	2015-01-01	100	98.06	vfdb	YP_404600	(gspD) general secretion pathway protein D [T2SS (VF0333)] [Shigella dysenteriae Sd197]
DTU_2024_1035954_100_SI_LVK_43_SE.fq.gz_flye.fasta	DTU_2024_1035954_100_SI_LVK_43_SE.fq.gz_flye_contig_6	182150	183643	+	gspE	1-1494/1494	===============	0/0	100	97.32	vfdb	YP_404601	(gspE) general secretion pathway protein E [T2SS (VF0333)] [Shigella dysenteriae Sd197]
DTU_2024_1035954_100_SI_LVK_43_SE.fq.gz_flye.fasta	DTU_2024_1035954_100_SI_LVK_43_SE.fq.gz_flye_contig_6	183643	184842	+	gspF	1-1200/1200	===============	0/0	100	98.17	vfdb	YP_404602	(gspF) general secretion pathway protein F [T2SS (VF0333)] [Shigella dysenteriae Sd197]
DTU_2024_1035954_100_SI_LVK_43_SE.fq.gz_flye.fasta	DTU_2024_1035954_100_SI_LVK_43_SE.fq.gz_flye_contig_6	184883	185338	+	gspG	1-456/456	===============	0/0	100	95.83	vfdb	YP_404603	(gspG) general secretion pathway protein G [T2SS (VF0333)] [Shigella dysenteriae Sd197]
DTU_2024_1035954_100_SI_LVK_43_SE.fq.gz_flye.fasta	DTU_2024_1035954_100_SI_LVK_43_SE.fq.gz_flye_contig_6	185375	185905	+	gspH	1-531/531	===============	0/0	100	97.93	vfdb	YP_404604	(gspH) general secretion pathway protein H [T2SS (VF0333)] [Shigella dysenteriae Sd197]
DTU_2024_1035954_100_SI_LVK_43_SE.fq.gz_flye.fasta	DTU_2024_1035954_100_SI_LVK_43_SE.fq.gz_flye_contig_6	185902	186273	+	gspI	1-372/372	===============	0/0	100	97.31	vfdb	YP_404605	(gspI) general secretion pathway protein I [T2SS (VF0333)] [Shigella dysenteriae Sd197]
DTU_2024_1035954_100_SI_LVK_43_SE.fq.gz_flye.fasta	DTU_2024_1035954_100_SI_LVK_43_SE.fq.gz_flye_contig_6	186306	186875	+	gspJ	1-570/570	===============	0/0	100	97.54	vfdb	YP_404606	(gspJ) general secretion pathway protein J [T2SS (VF0333)] [Shigella dysenteriae Sd197]
DTU_2024_1035954_100_SI_LVK_43_SE.fq.gz_flye.fasta	DTU_2024_1035954_100_SI_LVK_43_SE.fq.gz_flye_contig_6	186872	187849	+	gspK	1-978/978	===============	0/0	100	98.36	vfdb	YP_404607	(gspK) general secretion pathway protein K [T2SS (VF0333)] [Shigella dysenteriae Sd197]
DTU_2024_1035954_100_SI_LVK_43_SE.fq.gz_flye.fasta	DTU_2024_1035954_100_SI_LVK_43_SE.fq.gz_flye_contig_6	188164	189024	+	gspL	1-861/861	===============	0/0	100	98.49	vfdb	YP_404608	(gspL) general secretion pathway protein L [T2SS (VF0333)] [Shigella dysenteriae Sd197]
DTU_2024_1035954_100_SI_LVK_43_SE.fq.gz_flye.fasta	DTU_2024_1035954_100_SI_LVK_43_SE.fq.gz_flye_contig_6	189140	189562	+	gspM	1-423/423	===============	0/0	100	98.34	vfdb	YP_404609	(gspM) general secretion pathway protein M [T2SS (VF0333)] [Shigella dysenteriae Sd197]
DTU_2024_1035955_100_SI_LVK_48_SE.fq.gz_flye.fasta	DTU_2024_1035955_100_SI_LVK_48_SE.fq.gz_flye_contig_10	214280	215237	+	stx2A	1-958/960	===============	0/0	99.79	94.26	vfdb	NP_286976	(stx2A) shiga-like toxin II A subunit encoded by bacteriophage BP-933W [Stx (VF0206)] [Escherichia coli O157:H7 str. EDL933]
DTU_2024_1035955_100_SI_LVK_48_SE.fq.gz_flye.fasta	DTU_2024_1035955_100_SI_LVK_48_SE.fq.gz_flye_contig_12	11096	12532	-	hlyD	1-1437/1437	===============	0/0	100	96.73	vfdb	NP_755449	(hlyD) Hemolysin D [Hemolysin (VF0225)] [Escherichia coli CFT073]
DTU_2024_1035955_100_SI_LVK_48_SE.fq.gz_flye.fasta	DTU_2024_1035955_100_SI_LVK_48_SE.fq.gz_flye_contig_12	12551	14674	-	hlyB	1-2124/2124	===============	0/0	100	98.12	vfdb	NP_755448	(hlyB) Hemolysin B [Hemolysin (VF0225)] [Escherichia coli CFT073]
DTU_2024_1035955_100_SI_LVK_48_SE.fq.gz_flye.fasta	DTU_2024_1035955_100_SI_LVK_48_SE.fq.gz_flye_contig_12	14746	17820	-	hlyA	1-3075/3075	===============	0/0	100	96.88	vfdb	NP_755445	(hlyA) Hemolysin A [Hemolysin (VF0225)] [Escherichia coli CFT073]
DTU_2024_1035955_100_SI_LVK_48_SE.fq.gz_flye.fasta	DTU_2024_1035955_100_SI_LVK_48_SE.fq.gz_flye_contig_12	48349	48465	+	astA	1-117/117	===============	0/0	100	100	vfdb	BAA94855	(astA) heat-stable enterotoxin 1 [EAST1 (VF0216)] [Escherichia coli O44:H18 042]
DTU_2024_1035955_100_SI_LVK_48_SE.fq.gz_flye.fasta	DTU_2024_1035955_100_SI_LVK_48_SE.fq.gz_flye_contig_17	38	409	-	gspI	1-372/372	===============	0/0	100	94.09	vfdb	YP_404605	(gspI) general secretion pathway protein I [T2SS (VF0333)] [Shigella dysenteriae Sd197]
DTU_2024_1035955_100_SI_LVK_48_SE.fq.gz_flye.fasta	DTU_2024_1035955_100_SI_LVK_48_SE.fq.gz_flye_contig_17	406	936	-	gspH	1-531/531	===============	0/0	100	96.05	vfdb	YP_404604	(gspH) general secretion pathway protein H [T2SS (VF0333)] [Shigella dysenteriae Sd197]
DTU_2024_1035955_100_SI_LVK_48_SE.fq.gz_flye.fasta	DTU_2024_1035955_100_SI_LVK_48_SE.fq.gz_flye_contig_17	973	1428	-	gspG	1-456/456	===============	0/0	100	96.05	vfdb	YP_404603	(gspG) general secretion pathway protein G [T2SS (VF0333)] [Shigella dysenteriae Sd197]
DTU_2024_1035955_100_SI_LVK_48_SE.fq.gz_flye.fasta	DTU_2024_1035955_100_SI_LVK_48_SE.fq.gz_flye_contig_17	1469	2668	-	gspF	1-1200/1200	===============	0/0	100	94.83	vfdb	YP_404602	(gspF) general secretion pathway protein F [T2SS (VF0333)] [Shigella dysenteriae Sd197]
DTU_2024_1035955_100_SI_LVK_48_SE.fq.gz_flye.fasta	DTU_2024_1035955_100_SI_LVK_48_SE.fq.gz_flye_contig_17	2668	4161	-	gspE	1-1494/1494	===============	0/0	100	95.25	vfdb	YP_404601	(gspE) general secretion pathway protein E [T2SS (VF0333)] [Shigella dysenteriae Sd197]
DTU_2024_1035955_100_SI_LVK_48_SE.fq.gz_flye.fasta	DTU_2024_1035955_100_SI_LVK_48_SE.fq.gz_flye_contig_17	4161	6011	-	gspD	1-1836/1836	========/======	2015-01-01	100	94.06	vfdb	YP_404600	(gspD) general secretion pathway protein D [T2SS (VF0333)] [Shigella dysenteriae Sd197]
DTU_2024_1035955_100_SI_LVK_48_SE.fq.gz_flye.fasta	DTU_2024_1035955_100_SI_LVK_48_SE.fq.gz_flye_contig_17	6251	7081	-	gspC	1-831/831	===============	0/0	100	93.5	vfdb	YP_404599	(gspC) general secretion pathway protein C [T2SS (VF0333)] [Shigella dysenteriae Sd197]
DTU_2024_1035955_100_SI_LVK_48_SE.fq.gz_flye.fasta	DTU_2024_1035955_100_SI_LVK_48_SE.fq.gz_flye_contig_17	146817	147647	+	gspC	1-831/831	===============	0/0	100	95.07	vfdb	YP_404599	(gspC) general secretion pathway protein C [T2SS (VF0333)] [Shigella dysenteriae Sd197]
DTU_2024_1035955_100_SI_LVK_48_SE.fq.gz_flye.fasta	DTU_2024_1035955_100_SI_LVK_48_SE.fq.gz_flye_contig_17	147887	149737	+	gspD	1-1836/1836	========/======	2015-01-01	100	97.35	vfdb	YP_404600	(gspD) general secretion pathway protein D [T2SS (VF0333)] [Shigella dysenteriae Sd197]
DTU_2024_1035955_100_SI_LVK_48_SE.fq.gz_flye.fasta	DTU_2024_1035955_100_SI_LVK_48_SE.fq.gz_flye_contig_2	353439	354859	+	espX1	1-1422/1422	========/======	2025-01-01	99.93	94.37	vfdb	NP_285716	(espX1) Type III secretion system effector EspX1 [LEE encoded T3SS (SS020)] [Escherichia coli O157:H7 str. EDL933]
DTU_2024_1035955_100_SI_LVK_48_SE.fq.gz_flye.fasta	DTU_2024_1035955_100_SI_LVK_48_SE.fq.gz_flye_contig_2	465841	466752	-	fimH	1-912/912	===============	0/0	100	97.26	vfdb	NP_757248	(fimH) FimH protein precursor [Type 1 fimbriae (VF0221)] [Escherichia coli CFT073]
DTU_2024_1035955_100_SI_LVK_48_SE.fq.gz_flye.fasta	DTU_2024_1035955_100_SI_LVK_48_SE.fq.gz_flye_contig_2	466763	467266	-	fimG	1-504/504	===============	0/0	100	97.82	vfdb	NP_757247	(fimG) FimG protein precursor [Type 1 fimbriae (VF0221)] [Escherichia coli CFT073]
DTU_2024_1035955_100_SI_LVK_48_SE.fq.gz_flye.fasta	DTU_2024_1035955_100_SI_LVK_48_SE.fq.gz_flye_contig_2	467279	467812	-	fimF	1-534/534	===============	0/0	100	97	vfdb	NP_757245	(fimF) FimF protein precursor [Type 1 fimbriae (VF0221)] [Escherichia coli CFT073]
DTU_2024_1035955_100_SI_LVK_48_SE.fq.gz_flye.fasta	DTU_2024_1035955_100_SI_LVK_48_SE.fq.gz_flye_contig_2	467819	470455	-	fimD	1-2637/2637	===============	0/0	100	98.6	vfdb	NP_757244	(fimD) Outer membrane usher protein fimD precursor [Type 1 fimbriae (VF0221)] [Escherichia coli CFT073]
DTU_2024_1035955_100_SI_LVK_48_SE.fq.gz_flye.fasta	DTU_2024_1035955_100_SI_LVK_48_SE.fq.gz_flye_contig_2	470522	471247	-	fimC	1-726/726	===============	0/0	100	98.62	vfdb	NP_757243	(fimC) Chaperone protein fimC precursor [Type 1 fimbriae (VF0221)] [Escherichia coli CFT073]
DTU_2024_1035955_100_SI_LVK_48_SE.fq.gz_flye.fasta	DTU_2024_1035955_100_SI_LVK_48_SE.fq.gz_flye_contig_2	471284	471798	-	fimI	26-540/540	===============	0/0	95.37	97.86	vfdb	NP_757242	(fimI) Fimbrin-like protein fimI precursor [Type 1 fimbriae (VF0221)] [Escherichia coli CFT073]
DTU_2024_1035955_100_SI_LVK_48_SE.fq.gz_flye.fasta	DTU_2024_1035955_100_SI_LVK_48_SE.fq.gz_flye_contig_2	712257	713549	+	espX5	1-1293/1293	===============	0/0	100	95.51	vfdb	NP_290699	(espX5) Type III secretion system effector EspX5 [LEE encoded T3SS (SS020)] [Escherichia coli O157:H7 str. EDL933]
DTU_2024_1035955_100_SI_LVK_48_SE.fq.gz_flye.fasta	DTU_2024_1035955_100_SI_LVK_48_SE.fq.gz_flye_contig_2	744628	746209	-	espX4	1-1581/1581	========/======	2025-03-03	99.94	92.86	vfdb	NP_290672	(espX4) Type III secretion system effector EspX4 [LEE encoded T3SS (SS020)] [Escherichia coli O157:H7 str. EDL933]
DTU_2024_1035955_100_SI_LVK_48_SE.fq.gz_flye.fasta	DTU_2024_1035955_100_SI_LVK_48_SE.fq.gz_flye_contig_2	1844102	1844524	-	gspM	1-423/423	===============	0/0	100	94.56	vfdb	YP_404609	(gspM) general secretion pathway protein M [T2SS (VF0333)] [Shigella dysenteriae Sd197]
DTU_2024_1035955_100_SI_LVK_48_SE.fq.gz_flye.fasta	DTU_2024_1035955_100_SI_LVK_48_SE.fq.gz_flye_contig_2	1844640	1845500	-	gspL	1-861/861	===============	0/0	100	95.82	vfdb	YP_404608	(gspL) general secretion pathway protein L [T2SS (VF0333)] [Shigella dysenteriae Sd197]
DTU_2024_1035955_100_SI_LVK_48_SE.fq.gz_flye.fasta	DTU_2024_1035955_100_SI_LVK_48_SE.fq.gz_flye_contig_2	1845815	1846792	-	gspK	1-978/978	===============	0/0	100	94.68	vfdb	YP_404607	(gspK) general secretion pathway protein K [T2SS (VF0333)] [Shigella dysenteriae Sd197]
DTU_2024_1035955_100_SI_LVK_48_SE.fq.gz_flye.fasta	DTU_2024_1035955_100_SI_LVK_48_SE.fq.gz_flye_contig_2	1846789	1847358	-	gspJ	1-570/570	===============	0/0	100	92.98	vfdb	YP_404606	(gspJ) general secretion pathway protein J [T2SS (VF0333)] [Shigella dysenteriae Sd197]
DTU_2024_1035955_100_SI_LVK_48_SE.fq.gz_flye.fasta	DTU_2024_1035955_100_SI_LVK_48_SE.fq.gz_flye_contig_2	1847391	1847763	-	gspI	1-372/372	========/======	2025-01-01	100	93.83	vfdb	YP_404605	(gspI) general secretion pathway protein I [T2SS (VF0333)] [Shigella dysenteriae Sd197]
DTU_2024_1035955_100_SI_LVK_48_SE.fq.gz_flye.fasta	DTU_2024_1035955_100_SI_LVK_48_SE.fq.gz_flye_contig_2	1847760	1848291	-	gspH	1-531/531	========/======	2025-01-01	100	95.86	vfdb	YP_404604	(gspH) general secretion pathway protein H [T2SS (VF0333)] [Shigella dysenteriae Sd197]
DTU_2024_1035955_100_SI_LVK_48_SE.fq.gz_flye.fasta	DTU_2024_1035955_100_SI_LVK_48_SE.fq.gz_flye_contig_2	1848328	1848783	-	gspG	1-456/456	===============	0/0	100	95.39	vfdb	YP_404603	(gspG) general secretion pathway protein G [T2SS (VF0333)] [Shigella dysenteriae Sd197]
DTU_2024_1035955_100_SI_LVK_48_SE.fq.gz_flye.fasta	DTU_2024_1035955_100_SI_LVK_48_SE.fq.gz_flye_contig_2	1848824	1850025	-	gspF	1-1200/1200	========/======	2025-02-02	100	96.17	vfdb	YP_404602	(gspF) general secretion pathway protein F [T2SS (VF0333)] [Shigella dysenteriae Sd197]
DTU_2024_1035955_100_SI_LVK_48_SE.fq.gz_flye.fasta	DTU_2024_1035955_100_SI_LVK_48_SE.fq.gz_flye_contig_2	1850025	1851520	-	gspE	1-1494/1494	========/======	2025-02-02	100	95.92	vfdb	YP_404601	(gspE) general secretion pathway protein E [T2SS (VF0333)] [Shigella dysenteriae Sd197]
DTU_2024_1035955_100_SI_LVK_48_SE.fq.gz_flye.fasta	DTU_2024_1035955_100_SI_LVK_48_SE.fq.gz_flye_contig_2	1851520	1853372	-	gspD	1-1836/1836	========/======	2017-03-01	100	95.9	vfdb	YP_404600	(gspD) general secretion pathway protein D [T2SS (VF0333)] [Shigella dysenteriae Sd197]
DTU_2024_1035955_100_SI_LVK_48_SE.fq.gz_flye.fasta	DTU_2024_1035955_100_SI_LVK_48_SE.fq.gz_flye_contig_2	1853612	1854445	-	gspC	1-831/831	========/======	2025-03-03	100	94	vfdb	YP_404599	(gspC) general secretion pathway protein C [T2SS (VF0333)] [Shigella dysenteriae Sd197]
DTU_2024_1035955_100_SI_LVK_48_SE.fq.gz_flye.fasta	DTU_2024_1035955_100_SI_LVK_48_SE.fq.gz_flye_contig_28	171	593	-	gspM	1-423/423	===============	0/0	100	94.56	vfdb	YP_404609	(gspM) general secretion pathway protein M [T2SS (VF0333)] [Shigella dysenteriae Sd197]
DTU_2024_1035955_100_SI_LVK_48_SE.fq.gz_flye.fasta	DTU_2024_1035955_100_SI_LVK_48_SE.fq.gz_flye_contig_28	709	1569	-	gspL	1-861/861	===============	0/0	100	95.82	vfdb	YP_404608	(gspL) general secretion pathway protein L [T2SS (VF0333)] [Shigella dysenteriae Sd197]
DTU_2024_1035955_100_SI_LVK_48_SE.fq.gz_flye.fasta	DTU_2024_1035955_100_SI_LVK_48_SE.fq.gz_flye_contig_28	1884	2861	-	gspK	1-978/978	===============	0/0	100	94.68	vfdb	YP_404607	(gspK) general secretion pathway protein K [T2SS (VF0333)] [Shigella dysenteriae Sd197]
DTU_2024_1035955_100_SI_LVK_48_SE.fq.gz_flye.fasta	DTU_2024_1035955_100_SI_LVK_48_SE.fq.gz_flye_contig_28	2858	3427	-	gspJ	1-570/570	===============	0/0	100	92.98	vfdb	YP_404606	(gspJ) general secretion pathway protein J [T2SS (VF0333)] [Shigella dysenteriae Sd197]
DTU_2024_1035955_100_SI_LVK_48_SE.fq.gz_flye.fasta	DTU_2024_1035955_100_SI_LVK_48_SE.fq.gz_flye_contig_28	3460	3831	-	gspI	1-372/372	===============	0/0	100	94.09	vfdb	YP_404605	(gspI) general secretion pathway protein I [T2SS (VF0333)] [Shigella dysenteriae Sd197]
DTU_2024_1035955_100_SI_LVK_48_SE.fq.gz_flye.fasta	DTU_2024_1035955_100_SI_LVK_48_SE.fq.gz_flye_contig_28	3828	4358	-	gspH	1-531/531	===============	0/0	100	96.05	vfdb	YP_404604	(gspH) general secretion pathway protein H [T2SS (VF0333)] [Shigella dysenteriae Sd197]
DTU_2024_1035955_100_SI_LVK_48_SE.fq.gz_flye.fasta	DTU_2024_1035955_100_SI_LVK_48_SE.fq.gz_flye_contig_28	4395	4850	-	gspG	1-456/456	===============	0/0	100	96.05	vfdb	YP_404603	(gspG) general secretion pathway protein G [T2SS (VF0333)] [Shigella dysenteriae Sd197]
DTU_2024_1035955_100_SI_LVK_48_SE.fq.gz_flye.fasta	DTU_2024_1035955_100_SI_LVK_48_SE.fq.gz_flye_contig_28	4891	6090	-	gspF	1-1200/1200	===============	0/0	100	94.83	vfdb	YP_404602	(gspF) general secretion pathway protein F [T2SS (VF0333)] [Shigella dysenteriae Sd197]
DTU_2024_1035955_100_SI_LVK_48_SE.fq.gz_flye.fasta	DTU_2024_1035955_100_SI_LVK_48_SE.fq.gz_flye_contig_28	6090	7583	-	gspE	1-1494/1494	===============	0/0	100	95.25	vfdb	YP_404601	(gspE) general secretion pathway protein E [T2SS (VF0333)] [Shigella dysenteriae Sd197]
DTU_2024_1035955_100_SI_LVK_48_SE.fq.gz_flye.fasta	DTU_2024_1035955_100_SI_LVK_48_SE.fq.gz_flye_contig_28	7583	9433	-	gspD	1-1836/1836	========/======	2015-01-01	100	94.06	vfdb	YP_404600	(gspD) general secretion pathway protein D [T2SS (VF0333)] [Shigella dysenteriae Sd197]
DTU_2024_1035955_100_SI_LVK_48_SE.fq.gz_flye.fasta	DTU_2024_1035955_100_SI_LVK_48_SE.fq.gz_flye_contig_28	9673	10503	-	gspC	1-831/831	===============	0/0	100	93.5	vfdb	YP_404599	(gspC) general secretion pathway protein C [T2SS (VF0333)] [Shigella dysenteriae Sd197]
DTU_2024_1035955_100_SI_LVK_48_SE.fq.gz_flye.fasta	DTU_2024_1035955_100_SI_LVK_48_SE.fq.gz_flye_contig_8	547345	547767	-	gspM	1-423/423	===============	0/0	100	94.09	vfdb	YP_404609	(gspM) general secretion pathway protein M [T2SS (VF0333)] [Shigella dysenteriae Sd197]
DTU_2024_1035955_100_SI_LVK_48_SE.fq.gz_flye.fasta	DTU_2024_1035955_100_SI_LVK_48_SE.fq.gz_flye_contig_8	547883	548743	-	gspL	1-861/861	===============	0/0	100	97.56	vfdb	YP_404608	(gspL) general secretion pathway protein L [T2SS (VF0333)] [Shigella dysenteriae Sd197]
DTU_2024_1035955_100_SI_LVK_48_SE.fq.gz_flye.fasta	DTU_2024_1035955_100_SI_LVK_48_SE.fq.gz_flye_contig_8	549058	550035	-	gspK	1-978/978	===============	0/0	100	97.75	vfdb	YP_404607	(gspK) general secretion pathway protein K [T2SS (VF0333)] [Shigella dysenteriae Sd197]
DTU_2024_1035955_100_SI_LVK_48_SE.fq.gz_flye.fasta	DTU_2024_1035955_100_SI_LVK_48_SE.fq.gz_flye_contig_8	550032	550601	-	gspJ	1-570/570	===============	0/0	100	97.19	vfdb	YP_404606	(gspJ) general secretion pathway protein J [T2SS (VF0333)] [Shigella dysenteriae Sd197]
DTU_2024_1035955_100_SI_LVK_48_SE.fq.gz_flye.fasta	DTU_2024_1035955_100_SI_LVK_48_SE.fq.gz_flye_contig_8	550634	551005	-	gspI	1-372/372	===============	0/0	100	94.62	vfdb	YP_404605	(gspI) general secretion pathway protein I [T2SS (VF0333)] [Shigella dysenteriae Sd197]
DTU_2024_1035955_100_SI_LVK_48_SE.fq.gz_flye.fasta	DTU_2024_1035955_100_SI_LVK_48_SE.fq.gz_flye_contig_8	551002	551532	-	gspH	1-531/531	===============	0/0	100	95.86	vfdb	YP_404604	(gspH) general secretion pathway protein H [T2SS (VF0333)] [Shigella dysenteriae Sd197]
DTU_2024_1035955_100_SI_LVK_48_SE.fq.gz_flye.fasta	DTU_2024_1035955_100_SI_LVK_48_SE.fq.gz_flye_contig_8	551569	552024	-	gspG	1-456/456	===============	0/0	100	95.61	vfdb	YP_404603	(gspG) general secretion pathway protein G [T2SS (VF0333)] [Shigella dysenteriae Sd197]
DTU_2024_1035955_100_SI_LVK_48_SE.fq.gz_flye.fasta	DTU_2024_1035955_100_SI_LVK_48_SE.fq.gz_flye_contig_8	552065	553264	-	gspF	1-1200/1200	===============	0/0	100	96.25	vfdb	YP_404602	(gspF) general secretion pathway protein F [T2SS (VF0333)] [Shigella dysenteriae Sd197]
DTU_2024_1035955_100_SI_LVK_48_SE.fq.gz_flye.fasta	DTU_2024_1035955_100_SI_LVK_48_SE.fq.gz_flye_contig_8	553264	554757	-	gspE	1-1494/1494	===============	0/0	100	96.79	vfdb	YP_404601	(gspE) general secretion pathway protein E [T2SS (VF0333)] [Shigella dysenteriae Sd197]
DTU_2024_1035955_100_SI_LVK_48_SE.fq.gz_flye.fasta	DTU_2024_1035955_100_SI_LVK_48_SE.fq.gz_flye_contig_8	554757	556607	-	gspD	1-1836/1836	========/======	2015-01-01	100	97.35	vfdb	YP_404600	(gspD) general secretion pathway protein D [T2SS (VF0333)] [Shigella dysenteriae Sd197]
DTU_2024_1035955_100_SI_LVK_48_SE.fq.gz_flye.fasta	DTU_2024_1035955_100_SI_LVK_48_SE.fq.gz_flye_contig_8	556847	557677	-	gspC	1-831/831	===============	0/0	100	95.07	vfdb	YP_404599	(gspC) general secretion pathway protein C [T2SS (VF0333)] [Shigella dysenteriae Sd197]
DTU_2024_1035955_100_SI_LVK_48_SE.fq.gz_flye.fasta	DTU_2024_1035955_100_SI_LVK_48_SE.fq.gz_flye_contig_9	361771	362823	-	ompA	1-1041/1041	========/======	2025-12-01	100	94.3	vfdb	AAF37887	(ompA) outer membrane protein A [OmpA (VF0236)] [Escherichia coli O18:K1:H7 str. RS218]
DTU_2024_1035955_100_SI_LVK_48_SE.fq.gz_flye.fasta	DTU_2024_1035955_100_SI_LVK_48_SE.fq.gz_flye_contig_9	869019	869789	-	entD	1-771/771	===============	0/0	100	94.03	vfdb	NP_752599	(entD) phosphopantetheinyl transferase component of enterobactin synthase multienzyme complex [Enterobactin (VF0228)] [Escherichia coli CFT073]
DTU_2024_1035955_100_SI_LVK_48_SE.fq.gz_flye.fasta	DTU_2024_1035955_100_SI_LVK_48_SE.fq.gz_flye_contig_9	869814	872054	-	fepA	1-2241/2241	===============	0/0	100	96.79	vfdb	NP_752600	(fepA) ferrienterobactin outer membrane transporter [Enterobactin (VF0228)] [Escherichia coli CFT073]
DTU_2024_1035955_100_SI_LVK_48_SE.fq.gz_flye.fasta	DTU_2024_1035955_100_SI_LVK_48_SE.fq.gz_flye_contig_9	872297	873499	+	fes	1-1203/1203	===============	0/0	100	96.51	vfdb	NP_752602	(fes) enterobactin/ferric enterobactin esterase [enterobactin (IA019)] [Escherichia coli CFT073]
DTU_2024_1035955_100_SI_LVK_48_SE.fq.gz_flye.fasta	DTU_2024_1035955_100_SI_LVK_48_SE.fq.gz_flye_contig_9	873717	877546	+	entF	1-3830/3882	===============	0/0	98.66	95.85	vfdb	NP_752604	(entF) enterobactin synthase multienzyme complex component ATP-dependent [Enterobactin (VF0228)] [Escherichia coli CFT073]
DTU_2024_1035955_100_SI_LVK_48_SE.fq.gz_flye.fasta	DTU_2024_1035955_100_SI_LVK_48_SE.fq.gz_flye_contig_9	878945	879760	-	fepC	1-816/816	===============	0/0	100	97.18	vfdb	NP_752606	(fepC) ferrienterobactin ABC transporter ATPase [Enterobactin (VF0228)] [Escherichia coli CFT073]
DTU_2024_1035955_100_SI_LVK_48_SE.fq.gz_flye.fasta	DTU_2024_1035955_100_SI_LVK_48_SE.fq.gz_flye_contig_9	879757	880749	-	fepG	1-993/993	===============	0/0	100	94.76	vfdb	NP_752607	(fepG) iron-enterobactin ABC transporter permease [Enterobactin (VF0228)] [Escherichia coli CFT073]
DTU_2024_1035955_100_SI_LVK_48_SE.fq.gz_flye.fasta	DTU_2024_1035955_100_SI_LVK_48_SE.fq.gz_flye_contig_9	880746	881762	-	fepD	1-1017/1017	===============	0/0	100	96.36	vfdb	NP_752608	(fepD) ferrienterobactin ABC transporter permease [Enterobactin (VF0228)] [Escherichia coli CFT073]
DTU_2024_1035955_100_SI_LVK_48_SE.fq.gz_flye.fasta	DTU_2024_1035955_100_SI_LVK_48_SE.fq.gz_flye_contig_9	881861	883111	+	entS	1-1251/1251	===============	0/0	100	95.6	vfdb	NP_752609	(entS) enterobactin exporter iron-regulated [enterobactin (IA019)] [Escherichia coli CFT073]
DTU_2024_1035955_100_SI_LVK_48_SE.fq.gz_flye.fasta	DTU_2024_1035955_100_SI_LVK_48_SE.fq.gz_flye_contig_9	883115	884071	-	fepB	1-957/957	===============	0/0	100	97.28	vfdb	NP_752610	(fepB) ferrienterobactin ABC transporter periplasmic binding protein [Enterobactin (VF0228)] [Escherichia coli CFT073]
DTU_2024_1035955_100_SI_LVK_48_SE.fq.gz_flye.fasta	DTU_2024_1035955_100_SI_LVK_48_SE.fq.gz_flye_contig_9	884434	885621	+	entC	1-1188/1188	===============	0/0	100	97.56	vfdb	NP_752611	(entC) isochorismate synthase 1 [Enterobactin (VF0228)] [Escherichia coli CFT073]
DTU_2024_1035955_100_SI_LVK_48_SE.fq.gz_flye.fasta	DTU_2024_1035955_100_SI_LVK_48_SE.fq.gz_flye_contig_9	885631	887241	+	entE	1-1611/1611	===============	0/0	100	95.97	vfdb	NP_752612	(entE) 23-dihydroxybenzoate-AMP ligase component of enterobactin synthase multienzyme complex [Enterobactin (VF0228)] [Escherichia coli CFT073]
DTU_2024_1035955_100_SI_LVK_48_SE.fq.gz_flye.fasta	DTU_2024_1035955_100_SI_LVK_48_SE.fq.gz_flye_contig_9	887255	888112	+	entB	1-858/858	===============	0/0	100	98.02	vfdb	NP_752613	(entB) isochorismatase [Enterobactin (VF0228)] [Escherichia coli CFT073]
DTU_2024_1035955_100_SI_LVK_48_SE.fq.gz_flye.fasta	DTU_2024_1035955_100_SI_LVK_48_SE.fq.gz_flye_contig_9	888112	888858	+	entA	1-747/747	===============	0/0	100	95.98	vfdb	NP_752614	(entA) 23-dihydro-23-dihydroxybenzoate dehydrogenase [Enterobactin (VF0228)] [Escherichia coli CFT073]
DTU_2024_1035956_100_SI_LVK_60_SE.fq.gz_flye.fasta	DTU_2024_1035956_100_SI_LVK_60_SE.fq.gz_flye_contig_14	202523	202945	-	gspM	1-423/423	===============	0/0	100	94.09	vfdb	YP_404609	(gspM) general secretion pathway protein M [T2SS (VF0333)] [Shigella dysenteriae Sd197]
DTU_2024_1035956_100_SI_LVK_60_SE.fq.gz_flye.fasta	DTU_2024_1035956_100_SI_LVK_60_SE.fq.gz_flye_contig_14	203061	203921	-	gspL	1-861/861	===============	0/0	100	97.56	vfdb	YP_404608	(gspL) general secretion pathway protein L [T2SS (VF0333)] [Shigella dysenteriae Sd197]
DTU_2024_1035956_100_SI_LVK_60_SE.fq.gz_flye.fasta	DTU_2024_1035956_100_SI_LVK_60_SE.fq.gz_flye_contig_14	204236	205213	-	gspK	1-978/978	===============	0/0	100	97.75	vfdb	YP_404607	(gspK) general secretion pathway protein K [T2SS (VF0333)] [Shigella dysenteriae Sd197]
DTU_2024_1035956_100_SI_LVK_60_SE.fq.gz_flye.fasta	DTU_2024_1035956_100_SI_LVK_60_SE.fq.gz_flye_contig_14	205210	205779	-	gspJ	1-570/570	===============	0/0	100	97.19	vfdb	YP_404606	(gspJ) general secretion pathway protein J [T2SS (VF0333)] [Shigella dysenteriae Sd197]
DTU_2024_1035956_100_SI_LVK_60_SE.fq.gz_flye.fasta	DTU_2024_1035956_100_SI_LVK_60_SE.fq.gz_flye_contig_14	205812	206183	-	gspI	1-372/372	===============	0/0	100	94.62	vfdb	YP_404605	(gspI) general secretion pathway protein I [T2SS (VF0333)] [Shigella dysenteriae Sd197]
DTU_2024_1035956_100_SI_LVK_60_SE.fq.gz_flye.fasta	DTU_2024_1035956_100_SI_LVK_60_SE.fq.gz_flye_contig_14	206180	206710	-	gspH	1-531/531	===============	0/0	100	95.67	vfdb	YP_404604	(gspH) general secretion pathway protein H [T2SS (VF0333)] [Shigella dysenteriae Sd197]
DTU_2024_1035956_100_SI_LVK_60_SE.fq.gz_flye.fasta	DTU_2024_1035956_100_SI_LVK_60_SE.fq.gz_flye_contig_14	206747	207202	-	gspG	1-456/456	===============	0/0	100	95.61	vfdb	YP_404603	(gspG) general secretion pathway protein G [T2SS (VF0333)] [Shigella dysenteriae Sd197]
DTU_2024_1035956_100_SI_LVK_60_SE.fq.gz_flye.fasta	DTU_2024_1035956_100_SI_LVK_60_SE.fq.gz_flye_contig_14	207243	208442	-	gspF	1-1200/1200	===============	0/0	100	96.25	vfdb	YP_404602	(gspF) general secretion pathway protein F [T2SS (VF0333)] [Shigella dysenteriae Sd197]
DTU_2024_1035956_100_SI_LVK_60_SE.fq.gz_flye.fasta	DTU_2024_1035956_100_SI_LVK_60_SE.fq.gz_flye_contig_14	208442	209935	-	gspE	1-1494/1494	===============	0/0	100	96.79	vfdb	YP_404601	(gspE) general secretion pathway protein E [T2SS (VF0333)] [Shigella dysenteriae Sd197]
DTU_2024_1035956_100_SI_LVK_60_SE.fq.gz_flye.fasta	DTU_2024_1035956_100_SI_LVK_60_SE.fq.gz_flye_contig_14	209935	211785	-	gspD	1-1836/1836	========/======	2015-01-01	100	97.35	vfdb	YP_404600	(gspD) general secretion pathway protein D [T2SS (VF0333)] [Shigella dysenteriae Sd197]
DTU_2024_1035956_100_SI_LVK_60_SE.fq.gz_flye.fasta	DTU_2024_1035956_100_SI_LVK_60_SE.fq.gz_flye_contig_14	212025	212855	-	gspC	1-831/831	===============	0/0	100	95.07	vfdb	YP_404599	(gspC) general secretion pathway protein C [T2SS (VF0333)] [Shigella dysenteriae Sd197]
DTU_2024_1035956_100_SI_LVK_60_SE.fq.gz_flye.fasta	DTU_2024_1035956_100_SI_LVK_60_SE.fq.gz_flye_contig_14	220154	220984	+	gspC	1-831/831	===============	0/0	100	95.07	vfdb	YP_404599	(gspC) general secretion pathway protein C [T2SS (VF0333)] [Shigella dysenteriae Sd197]
DTU_2024_1035956_100_SI_LVK_60_SE.fq.gz_flye.fasta	DTU_2024_1035956_100_SI_LVK_60_SE.fq.gz_flye_contig_14	221224	223074	+	gspD	1-1836/1836	========/======	2015-01-01	100	97.35	vfdb	YP_404600	(gspD) general secretion pathway protein D [T2SS (VF0333)] [Shigella dysenteriae Sd197]
DTU_2024_1035956_100_SI_LVK_60_SE.fq.gz_flye.fasta	DTU_2024_1035956_100_SI_LVK_60_SE.fq.gz_flye_contig_14	223074	224567	+	gspE	1-1494/1494	===============	0/0	100	96.79	vfdb	YP_404601	(gspE) general secretion pathway protein E [T2SS (VF0333)] [Shigella dysenteriae Sd197]
DTU_2024_1035956_100_SI_LVK_60_SE.fq.gz_flye.fasta	DTU_2024_1035956_100_SI_LVK_60_SE.fq.gz_flye_contig_14	224567	225766	+	gspF	1-1200/1200	===============	0/0	100	96.25	vfdb	YP_404602	(gspF) general secretion pathway protein F [T2SS (VF0333)] [Shigella dysenteriae Sd197]
DTU_2024_1035956_100_SI_LVK_60_SE.fq.gz_flye.fasta	DTU_2024_1035956_100_SI_LVK_60_SE.fq.gz_flye_contig_14	225807	226262	+	gspG	1-456/456	===============	0/0	100	95.61	vfdb	YP_404603	(gspG) general secretion pathway protein G [T2SS (VF0333)] [Shigella dysenteriae Sd197]
DTU_2024_1035956_100_SI_LVK_60_SE.fq.gz_flye.fasta	DTU_2024_1035956_100_SI_LVK_60_SE.fq.gz_flye_contig_14	226299	226829	+	gspH	1-531/531	===============	0/0	100	95.67	vfdb	YP_404604	(gspH) general secretion pathway protein H [T2SS (VF0333)] [Shigella dysenteriae Sd197]
DTU_2024_1035956_100_SI_LVK_60_SE.fq.gz_flye.fasta	DTU_2024_1035956_100_SI_LVK_60_SE.fq.gz_flye_contig_14	226826	227197	+	gspI	1-372/372	===============	0/0	100	94.62	vfdb	YP_404605	(gspI) general secretion pathway protein I [T2SS (VF0333)] [Shigella dysenteriae Sd197]
DTU_2024_1035956_100_SI_LVK_60_SE.fq.gz_flye.fasta	DTU_2024_1035956_100_SI_LVK_60_SE.fq.gz_flye_contig_14	227230	227799	+	gspJ	1-570/570	===============	0/0	100	97.19	vfdb	YP_404606	(gspJ) general secretion pathway protein J [T2SS (VF0333)] [Shigella dysenteriae Sd197]
DTU_2024_1035956_100_SI_LVK_60_SE.fq.gz_flye.fasta	DTU_2024_1035956_100_SI_LVK_60_SE.fq.gz_flye_contig_14	227796	228773	+	gspK	1-978/978	===============	0/0	100	97.75	vfdb	YP_404607	(gspK) general secretion pathway protein K [T2SS (VF0333)] [Shigella dysenteriae Sd197]
DTU_2024_1035956_100_SI_LVK_60_SE.fq.gz_flye.fasta	DTU_2024_1035956_100_SI_LVK_60_SE.fq.gz_flye_contig_14	229088	229948	+	gspL	1-861/861	===============	0/0	100	97.56	vfdb	YP_404608	(gspL) general secretion pathway protein L [T2SS (VF0333)] [Shigella dysenteriae Sd197]
DTU_2024_1035956_100_SI_LVK_60_SE.fq.gz_flye.fasta	DTU_2024_1035956_100_SI_LVK_60_SE.fq.gz_flye_contig_14	230064	230486	+	gspM	1-423/423	===============	0/0	100	94.09	vfdb	YP_404609	(gspM) general secretion pathway protein M [T2SS (VF0333)] [Shigella dysenteriae Sd197]
DTU_2024_1035956_100_SI_LVK_60_SE.fq.gz_flye.fasta	DTU_2024_1035956_100_SI_LVK_60_SE.fq.gz_flye_contig_15	42440	44336	-	espL1	1-1899/1899	========/======	2025-04-02	99.84	94.68	vfdb	NP_288154	(espL1) Type III secretion system effector espL1 [LEE encoded T3SS (SS020)] [Escherichia coli O157:H7 str. EDL933]
DTU_2024_1035956_100_SI_LVK_60_SE.fq.gz_flye.fasta	DTU_2024_1035956_100_SI_LVK_60_SE.fq.gz_flye_contig_17	369	3443	+	hlyA	1-3075/3075	===============	0/0	100	96.94	vfdb	NP_755445	(hlyA) Hemolysin A [Hemolysin (VF0225)] [Escherichia coli CFT073]
DTU_2024_1035956_100_SI_LVK_60_SE.fq.gz_flye.fasta	DTU_2024_1035956_100_SI_LVK_60_SE.fq.gz_flye_contig_17	3515	5638	+	hlyB	1-2124/2124	===============	0/0	100	98.16	vfdb	NP_755448	(hlyB) Hemolysin B [Hemolysin (VF0225)] [Escherichia coli CFT073]
DTU_2024_1035956_100_SI_LVK_60_SE.fq.gz_flye.fasta	DTU_2024_1035956_100_SI_LVK_60_SE.fq.gz_flye_contig_17	5657	7093	+	hlyD	1-1437/1437	===============	0/0	100	96.8	vfdb	NP_755449	(hlyD) Hemolysin D [Hemolysin (VF0225)] [Escherichia coli CFT073]
DTU_2024_1035956_100_SI_LVK_60_SE.fq.gz_flye.fasta	DTU_2024_1035956_100_SI_LVK_60_SE.fq.gz_flye_contig_2	230790	231842	-	ompA	1-1041/1041	========/======	2025-12-01	100	94.21	vfdb	AAF37887	(ompA) outer membrane protein A [OmpA (VF0236)] [Escherichia coli O18:K1:H7 str. RS218]
DTU_2024_1035956_100_SI_LVK_60_SE.fq.gz_flye.fasta	DTU_2024_1035956_100_SI_LVK_60_SE.fq.gz_flye_contig_24	160691	161437	-	entA	1-747/747	===============	0/0	100	95.98	vfdb	NP_752614	(entA) 23-dihydro-23-dihydroxybenzoate dehydrogenase [Enterobactin (VF0228)] [Escherichia coli CFT073]
DTU_2024_1035956_100_SI_LVK_60_SE.fq.gz_flye.fasta	DTU_2024_1035956_100_SI_LVK_60_SE.fq.gz_flye_contig_24	161437	162294	-	entB	1-858/858	===============	0/0	100	98.02	vfdb	NP_752613	(entB) isochorismatase [Enterobactin (VF0228)] [Escherichia coli CFT073]
DTU_2024_1035956_100_SI_LVK_60_SE.fq.gz_flye.fasta	DTU_2024_1035956_100_SI_LVK_60_SE.fq.gz_flye_contig_24	162308	163918	-	entE	1-1611/1611	===============	0/0	100	95.97	vfdb	NP_752612	(entE) 23-dihydroxybenzoate-AMP ligase component of enterobactin synthase multienzyme complex [Enterobactin (VF0228)] [Escherichia coli CFT073]
DTU_2024_1035956_100_SI_LVK_60_SE.fq.gz_flye.fasta	DTU_2024_1035956_100_SI_LVK_60_SE.fq.gz_flye_contig_24	163928	165115	-	entC	1-1188/1188	===============	0/0	100	97.47	vfdb	NP_752611	(entC) isochorismate synthase 1 [Enterobactin (VF0228)] [Escherichia coli CFT073]
DTU_2024_1035956_100_SI_LVK_60_SE.fq.gz_flye.fasta	DTU_2024_1035956_100_SI_LVK_60_SE.fq.gz_flye_contig_24	165478	166434	+	fepB	1-957/957	===============	0/0	100	97.28	vfdb	NP_752610	(fepB) ferrienterobactin ABC transporter periplasmic binding protein [Enterobactin (VF0228)] [Escherichia coli CFT073]
DTU_2024_1035956_100_SI_LVK_60_SE.fq.gz_flye.fasta	DTU_2024_1035956_100_SI_LVK_60_SE.fq.gz_flye_contig_24	166438	167688	-	entS	1-1251/1251	===============	0/0	100	95.6	vfdb	NP_752609	(entS) enterobactin exporter iron-regulated [enterobactin (IA019)] [Escherichia coli CFT073]
DTU_2024_1035956_100_SI_LVK_60_SE.fq.gz_flye.fasta	DTU_2024_1035956_100_SI_LVK_60_SE.fq.gz_flye_contig_24	167787	168803	+	fepD	1-1017/1017	===============	0/0	100	96.26	vfdb	NP_752608	(fepD) ferrienterobactin ABC transporter permease [Enterobactin (VF0228)] [Escherichia coli CFT073]
DTU_2024_1035956_100_SI_LVK_60_SE.fq.gz_flye.fasta	DTU_2024_1035956_100_SI_LVK_60_SE.fq.gz_flye_contig_24	168800	169792	+	fepG	1-993/993	===============	0/0	100	94.66	vfdb	NP_752607	(fepG) iron-enterobactin ABC transporter permease [Enterobactin (VF0228)] [Escherichia coli CFT073]
DTU_2024_1035956_100_SI_LVK_60_SE.fq.gz_flye.fasta	DTU_2024_1035956_100_SI_LVK_60_SE.fq.gz_flye_contig_24	169789	170604	+	fepC	1-816/816	===============	0/0	100	97.18	vfdb	NP_752606	(fepC) ferrienterobactin ABC transporter ATPase [Enterobactin (VF0228)] [Escherichia coli CFT073]
DTU_2024_1035956_100_SI_LVK_60_SE.fq.gz_flye.fasta	DTU_2024_1035956_100_SI_LVK_60_SE.fq.gz_flye_contig_24	172003	175832	-	entF	1-3830/3882	===============	0/0	98.66	95.88	vfdb	NP_752604	(entF) enterobactin synthase multienzyme complex component ATP-dependent [Enterobactin (VF0228)] [Escherichia coli CFT073]
DTU_2024_1035956_100_SI_LVK_60_SE.fq.gz_flye.fasta	DTU_2024_1035956_100_SI_LVK_60_SE.fq.gz_flye_contig_24	176050	177252	-	fes	1-1203/1203	===============	0/0	100	96.51	vfdb	NP_752602	(fes) enterobactin/ferric enterobactin esterase [enterobactin (IA019)] [Escherichia coli CFT073]
DTU_2024_1035956_100_SI_LVK_60_SE.fq.gz_flye.fasta	DTU_2024_1035956_100_SI_LVK_60_SE.fq.gz_flye_contig_24	177495	179735	+	fepA	1-2241/2241	===============	0/0	100	96.74	vfdb	NP_752600	(fepA) ferrienterobactin outer membrane transporter [Enterobactin (VF0228)] [Escherichia coli CFT073]
DTU_2024_1035956_100_SI_LVK_60_SE.fq.gz_flye.fasta	DTU_2024_1035956_100_SI_LVK_60_SE.fq.gz_flye_contig_24	179760	180530	+	entD	1-771/771	===============	0/0	100	94.03	vfdb	NP_752599	(entD) phosphopantetheinyl transferase component of enterobactin synthase multienzyme complex [Enterobactin (VF0228)] [Escherichia coli CFT073]
DTU_2024_1035956_100_SI_LVK_60_SE.fq.gz_flye.fasta	DTU_2024_1035956_100_SI_LVK_60_SE.fq.gz_flye_contig_24	468791	473016	-	fdeC	1-4229/4251	========/======	2025-03-01	99.41	91.37	vfdb	YP_002390132	(fdeC) adhesin FdeC [FdeC (VF0506)] [Escherichia coli O45:K1:H7 str. S88]
DTU_2024_1035956_100_SI_LVK_60_SE.fq.gz_flye.fasta	DTU_2024_1035956_100_SI_LVK_60_SE.fq.gz_flye_contig_24	476036	476626	+	ykgK/ecpR	1-591/591	===============	0/0	100	97.29	vfdb	NP_286011	(ykgK/ecpR) regulator protein EcpR [ECP (VF0404)] [Escherichia coli O157:H7 str. EDL933]
DTU_2024_1035956_100_SI_LVK_60_SE.fq.gz_flye.fasta	DTU_2024_1035956_100_SI_LVK_60_SE.fq.gz_flye_contig_24	476701	477288	+	yagZ/ecpA	1-588/588	===============	0/0	100	99.15	vfdb	NP_286010	(yagZ/ecpA) E. coli common pilus structural subunit EcpA [ECP (VF0404)] [Escherichia coli O157:H7 str. EDL933]
DTU_2024_1035956_100_SI_LVK_60_SE.fq.gz_flye.fasta	DTU_2024_1035956_100_SI_LVK_60_SE.fq.gz_flye_contig_24	477347	478015	+	yagY/ecpB	1-669/669	===============	0/0	100	98.36	vfdb	NP_286009	(yagY/ecpB) E. coli common pilus chaperone EcpB [ECP (VF0404)] [Escherichia coli O157:H7 str. EDL933]
DTU_2024_1035956_100_SI_LVK_60_SE.fq.gz_flye.fasta	DTU_2024_1035956_100_SI_LVK_60_SE.fq.gz_flye_contig_24	478041	480567	+	yagX/ecpC	1-2526/2526	========/======	2025-01-01	100	98.66	vfdb	NP_286008	(yagX/ecpC) E. coli common pilus usher EcpC [ECP (VF0404)] [Escherichia coli O157:H7 str. EDL933]
DTU_2024_1035956_100_SI_LVK_60_SE.fq.gz_flye.fasta	DTU_2024_1035956_100_SI_LVK_60_SE.fq.gz_flye_contig_24	480557	482200	+	yagW/ecpD	1-1644/1644	===============	0/0	100	98.66	vfdb	NP_286007	(yagW/ecpD) polymerized tip adhesin of ECP fibers [ECP (VF0404)] [Escherichia coli O157:H7 str. EDL933]
DTU_2024_1035956_100_SI_LVK_60_SE.fq.gz_flye.fasta	DTU_2024_1035956_100_SI_LVK_60_SE.fq.gz_flye_contig_24	482124	482877	+	yagV/ecpE	1-754/756	===============	0/0	99.74	96.82	vfdb	NP_286006	(yagV/ecpE) E. coli common pilus chaperone EcpE [ECP (VF0404)] [Escherichia coli O157:H7 str. EDL933]
DTU_2024_1035956_100_SI_LVK_60_SE.fq.gz_flye.fasta	DTU_2024_1035956_100_SI_LVK_60_SE.fq.gz_flye_contig_26	67905	69197	+	espX5	1-1293/1293	===============	0/0	100	95.51	vfdb	NP_290699	(espX5) Type III secretion system effector EspX5 [LEE encoded T3SS (SS020)] [Escherichia coli O157:H7 str. EDL933]
DTU_2024_1035956_100_SI_LVK_60_SE.fq.gz_flye.fasta	DTU_2024_1035956_100_SI_LVK_60_SE.fq.gz_flye_contig_26	98724	100305	-	espX4	1-1581/1581	========/======	2025-03-03	99.94	92.86	vfdb	NP_290672	(espX4) Type III secretion system effector EspX4 [LEE encoded T3SS (SS020)] [Escherichia coli O157:H7 str. EDL933]
DTU_2024_1035956_100_SI_LVK_60_SE.fq.gz_flye.fasta	DTU_2024_1035956_100_SI_LVK_60_SE.fq.gz_flye_contig_44	661	879	+	estIa	1-219/219	===============	0/0	100	100	vfdb	YP_003294006	(estIa) heat stable enterotoxin I [Heat-stable toxin (ST) (VF0211)] [Escherichia coli O78:H11:K80 str. H10407]
DTU_2024_1035956_100_SI_LVK_60_SE.fq.gz_flye.fasta	DTU_2024_1035956_100_SI_LVK_60_SE.fq.gz_flye_contig_45	165369	165971	+	fimB	1-603/603	===============	0/0	100	98.01	vfdb	NP_757239	(fimB) Type 1 fimbriae Regulatory protein fimB [Type 1 fimbriae (VF0221)] [Escherichia coli CFT073]
DTU_2024_1035956_100_SI_LVK_60_SE.fq.gz_flye.fasta	DTU_2024_1035956_100_SI_LVK_60_SE.fq.gz_flye_contig_45	166449	167045	+	fimE	1-597/597	===============	0/0	100	99.16	vfdb	NP_757240	(fimE) Type 1 fimbriae Regulatory protein fimE [Type 1 fimbriae (VF0221)] [Escherichia coli CFT073]
DTU_2024_1035956_100_SI_LVK_60_SE.fq.gz_flye.fasta	DTU_2024_1035956_100_SI_LVK_60_SE.fq.gz_flye_contig_45	168139	168678	+	fimI	1-540/540	===============	0/0	100	97.78	vfdb	NP_757242	(fimI) Fimbrin-like protein fimI precursor [Type 1 fimbriae (VF0221)] [Escherichia coli CFT073]
DTU_2024_1035956_100_SI_LVK_60_SE.fq.gz_flye.fasta	DTU_2024_1035956_100_SI_LVK_60_SE.fq.gz_flye_contig_45	168715	169440	+	fimC	1-726/726	===============	0/0	100	98.62	vfdb	NP_757243	(fimC) Chaperone protein fimC precursor [Type 1 fimbriae (VF0221)] [Escherichia coli CFT073]
DTU_2024_1035956_100_SI_LVK_60_SE.fq.gz_flye.fasta	DTU_2024_1035956_100_SI_LVK_60_SE.fq.gz_flye_contig_45	173488	174021	+	fimF	1-534/534	===============	0/0	100	97	vfdb	NP_757245	(fimF) FimF protein precursor [Type 1 fimbriae (VF0221)] [Escherichia coli CFT073]
DTU_2024_1035956_100_SI_LVK_60_SE.fq.gz_flye.fasta	DTU_2024_1035956_100_SI_LVK_60_SE.fq.gz_flye_contig_45	174034	174537	+	fimG	1-504/504	===============	0/0	100	97.82	vfdb	NP_757247	(fimG) FimG protein precursor [Type 1 fimbriae (VF0221)] [Escherichia coli CFT073]
DTU_2024_1035956_100_SI_LVK_60_SE.fq.gz_flye.fasta	DTU_2024_1035956_100_SI_LVK_60_SE.fq.gz_flye_contig_45	174548	175459	+	fimH	1-912/912	===============	0/0	100	97.26	vfdb	NP_757248	(fimH) FimH protein precursor [Type 1 fimbriae (VF0221)] [Escherichia coli CFT073]
DTU_2024_1035956_100_SI_LVK_60_SE.fq.gz_flye.fasta	DTU_2024_1035956_100_SI_LVK_60_SE.fq.gz_flye_contig_6	304271	305690	+	espX1	1-1422/1422	========/======	2025-02-02	99.86	94.44	vfdb	NP_285716	(espX1) Type III secretion system effector EspX1 [LEE encoded T3SS (SS020)] [Escherichia coli O157:H7 str. EDL933]
DTU_2024_1035956_100_SI_LVK_60_SE.fq.gz_flye.fasta	DTU_2024_1035956_100_SI_LVK_60_SE.fq.gz_flye_contig_7	264289	265593	-	ybtS	1-1305/1305	===============	0/0	100	99.92	vfdb	NP_405477	(ybtS) salicylate synthase Irp9 [Yersiniabactin (VF0136)] [Yersinia pestis CO92]
DTU_2024_1035956_100_SI_LVK_60_SE.fq.gz_flye.fasta	DTU_2024_1035956_100_SI_LVK_60_SE.fq.gz_flye_contig_7	265621	266901	-	ybtX	1-1281/1281	===============	0/0	100	99.69	vfdb	NP_405476	(ybtX) putative signal transducer [Yersiniabactin (VF0136)] [Yersinia pestis CO92]
DTU_2024_1035956_100_SI_LVK_60_SE.fq.gz_flye.fasta	DTU_2024_1035956_100_SI_LVK_60_SE.fq.gz_flye_contig_7	266894	268696	-	ybtQ	1-1803/1803	===============	0/0	100	99.61	vfdb	NP_405475	(ybtQ) inner membrane ABC-transporter YbtQ [Yersiniabactin (VF0136)] [Yersinia pestis CO92]
DTU_2024_1035956_100_SI_LVK_60_SE.fq.gz_flye.fasta	DTU_2024_1035956_100_SI_LVK_60_SE.fq.gz_flye_contig_7	268683	270485	-	ybtP	1-1803/1803	===============	0/0	100	99.61	vfdb	NP_405474	(ybtP) lipoprotein inner membrane ABC-transporter [Yersiniabactin (VF0136)] [Yersinia pestis CO92]
DTU_2024_1035956_100_SI_LVK_60_SE.fq.gz_flye.fasta	DTU_2024_1035956_100_SI_LVK_60_SE.fq.gz_flye_contig_7	270652	271611	+	ybtA	1-960/960	===============	0/0	100	99.48	vfdb	NP_405473	(ybtA) transcriptional regulator YbtA [Yersiniabactin (VF0136)] [Yersinia pestis CO92]
DTU_2024_1035956_100_SI_LVK_60_SE.fq.gz_flye.fasta	DTU_2024_1035956_100_SI_LVK_60_SE.fq.gz_flye_contig_7	271802	277909	+	irp2	1-6108/6108	===============	0/0	100	99.77	vfdb	NP_405472	(irp2) yersiniabactin biosynthetic protein Irp2 [Yersiniabactin (VF0136)] [Yersinia pestis CO92]
DTU_2024_1035956_100_SI_LVK_60_SE.fq.gz_flye.fasta	DTU_2024_1035956_100_SI_LVK_60_SE.fq.gz_flye_contig_7	277997	287488	+	irp1	1-9492/9492	===============	0/0	100	99.25	vfdb	NP_405471	(irp1) yersiniabactin biosynthetic protein Irp1 [Yersiniabactin (VF0136)] [Yersinia pestis CO92]
DTU_2024_1035956_100_SI_LVK_60_SE.fq.gz_flye.fasta	DTU_2024_1035956_100_SI_LVK_60_SE.fq.gz_flye_contig_7	287485	288585	+	ybtU	1-1101/1101	===============	0/0	100	100	vfdb	NP_405470	(ybtU) yersiniabactin biosynthetic protein YbtU [Yersiniabactin (VF0136)] [Yersinia pestis CO92]
DTU_2024_1035956_100_SI_LVK_60_SE.fq.gz_flye.fasta	DTU_2024_1035956_100_SI_LVK_60_SE.fq.gz_flye_contig_7	288582	289385	+	ybtT	1-804/804	===============	0/0	100	99.75	vfdb	NP_405469	(ybtT) yersiniabactin biosynthetic protein YbtT [Yersiniabactin (VF0136)] [Yersinia pestis CO92]
DTU_2024_1035956_100_SI_LVK_60_SE.fq.gz_flye.fasta	DTU_2024_1035956_100_SI_LVK_60_SE.fq.gz_flye_contig_7	289389	290966	+	ybtE	1-1578/1578	===============	0/0	100	99.81	vfdb	NP_405468	(ybtE) yersiniabactin siderophore biosynthetic protein [Yersiniabactin (VF0136)] [Yersinia pestis CO92]
DTU_2024_1035956_100_SI_LVK_60_SE.fq.gz_flye.fasta	DTU_2024_1035956_100_SI_LVK_60_SE.fq.gz_flye_contig_7	291097	293118	+	fyuA	1-2022/2022	===============	0/0	100	99.9	vfdb	NP_405467	(fyuA) pesticin/yersiniabactin receptor protein [Yersiniabactin (VF0136)] [Yersinia pestis CO92]
DTU_2024_1035957_100_SI_LVK_61_SE.fq.gz_flye.fasta	DTU_2024_1035957_100_SI_LVK_61_SE.fq.gz_flye_contig_1	221535	222288	-	yagV/ecpE	1-754/756	===============	0/0	99.74	96.68	vfdb	NP_286006	(yagV/ecpE) E. coli common pilus chaperone EcpE [ECP (VF0404)] [Escherichia coli O157:H7 str. EDL933]
DTU_2024_1035957_100_SI_LVK_61_SE.fq.gz_flye.fasta	DTU_2024_1035957_100_SI_LVK_61_SE.fq.gz_flye_contig_1	222212	223855	-	yagW/ecpD	1-1644/1644	===============	0/0	100	98.6	vfdb	NP_286007	(yagW/ecpD) polymerized tip adhesin of ECP fibers [ECP (VF0404)] [Escherichia coli O157:H7 str. EDL933]
DTU_2024_1035957_100_SI_LVK_61_SE.fq.gz_flye.fasta	DTU_2024_1035957_100_SI_LVK_61_SE.fq.gz_flye_contig_1	223845	226370	-	yagX/ecpC	1-2526/2526	===============	0/0	100	98.61	vfdb	NP_286008	(yagX/ecpC) E. coli common pilus usher EcpC [ECP (VF0404)] [Escherichia coli O157:H7 str. EDL933]
DTU_2024_1035957_100_SI_LVK_61_SE.fq.gz_flye.fasta	DTU_2024_1035957_100_SI_LVK_61_SE.fq.gz_flye_contig_1	226396	227064	-	yagY/ecpB	1-669/669	===============	0/0	100	98.21	vfdb	NP_286009	(yagY/ecpB) E. coli common pilus chaperone EcpB [ECP (VF0404)] [Escherichia coli O157:H7 str. EDL933]
DTU_2024_1035957_100_SI_LVK_61_SE.fq.gz_flye.fasta	DTU_2024_1035957_100_SI_LVK_61_SE.fq.gz_flye_contig_1	227122	227709	-	yagZ/ecpA	1-588/588	===============	0/0	100	99.15	vfdb	NP_286010	(yagZ/ecpA) E. coli common pilus structural subunit EcpA [ECP (VF0404)] [Escherichia coli O157:H7 str. EDL933]
DTU_2024_1035957_100_SI_LVK_61_SE.fq.gz_flye.fasta	DTU_2024_1035957_100_SI_LVK_61_SE.fq.gz_flye_contig_1	227784	228374	-	ykgK/ecpR	1-591/591	===============	0/0	100	97.63	vfdb	NP_286011	(ykgK/ecpR) regulator protein EcpR [ECP (VF0404)] [Escherichia coli O157:H7 str. EDL933]
DTU_2024_1035957_100_SI_LVK_61_SE.fq.gz_flye.fasta	DTU_2024_1035957_100_SI_LVK_61_SE.fq.gz_flye_contig_1	231373	235598	+	fdeC	1-4229/4251	========/======	2025-03-01	99.41	92.48	vfdb	YP_002390132	(fdeC) adhesin FdeC [FdeC (VF0506)] [Escherichia coli O45:K1:H7 str. S88]
DTU_2024_1035957_100_SI_LVK_61_SE.fq.gz_flye.fasta	DTU_2024_1035957_100_SI_LVK_61_SE.fq.gz_flye_contig_1	553040	553810	-	entD	1-771/771	===============	0/0	100	94.03	vfdb	NP_752599	(entD) phosphopantetheinyl transferase component of enterobactin synthase multienzyme complex [Enterobactin (VF0228)] [Escherichia coli CFT073]
DTU_2024_1035957_100_SI_LVK_61_SE.fq.gz_flye.fasta	DTU_2024_1035957_100_SI_LVK_61_SE.fq.gz_flye_contig_1	553835	556075	-	fepA	1-2241/2241	===============	0/0	100	96.74	vfdb	NP_752600	(fepA) ferrienterobactin outer membrane transporter [Enterobactin (VF0228)] [Escherichia coli CFT073]
DTU_2024_1035957_100_SI_LVK_61_SE.fq.gz_flye.fasta	DTU_2024_1035957_100_SI_LVK_61_SE.fq.gz_flye_contig_1	556318	557520	+	fes	1-1203/1203	===============	0/0	100	96.92	vfdb	NP_752602	(fes) enterobactin/ferric enterobactin esterase [enterobactin (IA019)] [Escherichia coli CFT073]
DTU_2024_1035957_100_SI_LVK_61_SE.fq.gz_flye.fasta	DTU_2024_1035957_100_SI_LVK_61_SE.fq.gz_flye_contig_1	557738	561567	+	entF	1-3830/3882	===============	0/0	98.66	95.56	vfdb	NP_752604	(entF) enterobactin synthase multienzyme complex component ATP-dependent [Enterobactin (VF0228)] [Escherichia coli CFT073]
DTU_2024_1035957_100_SI_LVK_61_SE.fq.gz_flye.fasta	DTU_2024_1035957_100_SI_LVK_61_SE.fq.gz_flye_contig_1	562965	563780	-	fepC	1-816/816	===============	0/0	100	96.94	vfdb	NP_752606	(fepC) ferrienterobactin ABC transporter ATPase [Enterobactin (VF0228)] [Escherichia coli CFT073]
DTU_2024_1035957_100_SI_LVK_61_SE.fq.gz_flye.fasta	DTU_2024_1035957_100_SI_LVK_61_SE.fq.gz_flye_contig_1	563777	564769	-	fepG	1-993/993	===============	0/0	100	94.66	vfdb	NP_752607	(fepG) iron-enterobactin ABC transporter permease [Enterobactin (VF0228)] [Escherichia coli CFT073]
DTU_2024_1035957_100_SI_LVK_61_SE.fq.gz_flye.fasta	DTU_2024_1035957_100_SI_LVK_61_SE.fq.gz_flye_contig_1	564766	565782	-	fepD	1-1017/1017	===============	0/0	100	96.36	vfdb	NP_752608	(fepD) ferrienterobactin ABC transporter permease [Enterobactin (VF0228)] [Escherichia coli CFT073]
DTU_2024_1035957_100_SI_LVK_61_SE.fq.gz_flye.fasta	DTU_2024_1035957_100_SI_LVK_61_SE.fq.gz_flye_contig_1	565881	567131	+	entS	1-1251/1251	===============	0/0	100	95.68	vfdb	NP_752609	(entS) enterobactin exporter iron-regulated [enterobactin (IA019)] [Escherichia coli CFT073]
DTU_2024_1035957_100_SI_LVK_61_SE.fq.gz_flye.fasta	DTU_2024_1035957_100_SI_LVK_61_SE.fq.gz_flye_contig_1	567135	568091	-	fepB	1-957/957	===============	0/0	100	97.39	vfdb	NP_752610	(fepB) ferrienterobactin ABC transporter periplasmic binding protein [Enterobactin (VF0228)] [Escherichia coli CFT073]
DTU_2024_1035957_100_SI_LVK_61_SE.fq.gz_flye.fasta	DTU_2024_1035957_100_SI_LVK_61_SE.fq.gz_flye_contig_1	568268	569455	+	entC	1-1188/1188	===============	0/0	100	97.9	vfdb	NP_752611	(entC) isochorismate synthase 1 [Enterobactin (VF0228)] [Escherichia coli CFT073]
DTU_2024_1035957_100_SI_LVK_61_SE.fq.gz_flye.fasta	DTU_2024_1035957_100_SI_LVK_61_SE.fq.gz_flye_contig_1	569465	571075	+	entE	1-1611/1611	===============	0/0	100	95.84	vfdb	NP_752612	(entE) 23-dihydroxybenzoate-AMP ligase component of enterobactin synthase multienzyme complex [Enterobactin (VF0228)] [Escherichia coli CFT073]
DTU_2024_1035957_100_SI_LVK_61_SE.fq.gz_flye.fasta	DTU_2024_1035957_100_SI_LVK_61_SE.fq.gz_flye_contig_1	571089	571946	+	entB	1-858/858	===============	0/0	100	97.2	vfdb	NP_752613	(entB) isochorismatase [Enterobactin (VF0228)] [Escherichia coli CFT073]
DTU_2024_1035957_100_SI_LVK_61_SE.fq.gz_flye.fasta	DTU_2024_1035957_100_SI_LVK_61_SE.fq.gz_flye_contig_1	571946	572692	+	entA	1-747/747	===============	0/0	100	95.85	vfdb	NP_752614	(entA) 23-dihydro-23-dihydroxybenzoate dehydrogenase [Enterobactin (VF0228)] [Escherichia coli CFT073]
DTU_2024_1035957_100_SI_LVK_61_SE.fq.gz_flye.fasta	DTU_2024_1035957_100_SI_LVK_61_SE.fq.gz_flye_contig_17	16330	17651	-	iucD	1-1323/1338	========/======	2025-01-01	98.8	96.14	vfdb	NP_755499	(iucD) L-lysine 6-monooxygenase IucD [Aerobactin (VF0229)] [Escherichia coli CFT073]
DTU_2024_1035957_100_SI_LVK_61_SE.fq.gz_flye.fasta	DTU_2024_1035957_100_SI_LVK_61_SE.fq.gz_flye_contig_17	17648	19390	-	iucC	1-1743/1743	===============	0/0	100	96.04	vfdb	NP_755500	(iucC) aerobactin siderophore biosynthesis protein IucC [Aerobactin (VF0229)] [Escherichia coli CFT073]
DTU_2024_1035957_100_SI_LVK_61_SE.fq.gz_flye.fasta	DTU_2024_1035957_100_SI_LVK_61_SE.fq.gz_flye_contig_17	19390	20337	-	iucB	1-948/948	===============	0/0	100	95.67	vfdb	NP_755501	(iucB) aerobactin siderophore biosynthesis protein IucB [Aerobactin (VF0229)] [Escherichia coli CFT073]
DTU_2024_1035957_100_SI_LVK_61_SE.fq.gz_flye.fasta	DTU_2024_1035957_100_SI_LVK_61_SE.fq.gz_flye_contig_17	20338	22125	-	iucA	1-1788/1788	===============	0/0	100	94.24	vfdb	NP_755502	(iucA) aerobactin siderophore biosynthesis protein IucD [Aerobactin (VF0229)] [Escherichia coli CFT073]
DTU_2024_1035957_100_SI_LVK_61_SE.fq.gz_flye.fasta	DTU_2024_1035957_100_SI_LVK_61_SE.fq.gz_flye_contig_17	74620	75782	+	iroB	1-1163/1164	===============	0/0	99.91	98.37	vfdb	NP_753168	(iroB) glucosyltransferase IroB [Salmochelin (IA013)] [Escherichia coli CFT073]
DTU_2024_1035957_100_SI_LVK_61_SE.fq.gz_flye.fasta	DTU_2024_1035957_100_SI_LVK_61_SE.fq.gz_flye_contig_17	75845	79582	+	iroC	1-3738/3738	===============	0/0	100	99.14	vfdb	NP_753167	(iroC) ATP binding cassette transporter [Salmochelin (IA013)] [Escherichia coli CFT073]
DTU_2024_1035957_100_SI_LVK_61_SE.fq.gz_flye.fasta	DTU_2024_1035957_100_SI_LVK_61_SE.fq.gz_flye_contig_17	79686	80915	+	iroD	1-1230/1230	===============	0/0	100	98.62	vfdb	NP_753166	(iroD) esterase [Salmochelin (IA013)] [Escherichia coli CFT073]
DTU_2024_1035957_100_SI_LVK_61_SE.fq.gz_flye.fasta	DTU_2024_1035957_100_SI_LVK_61_SE.fq.gz_flye_contig_17	81000	81956	+	iroE	1-957/957	===============	0/0	100	99.48	vfdb	NP_753165	(iroE) esterase [Salmochelin (IA013)] [Escherichia coli CFT073]
DTU_2024_1035957_100_SI_LVK_61_SE.fq.gz_flye.fasta	DTU_2024_1035957_100_SI_LVK_61_SE.fq.gz_flye_contig_17	82001	84178	-	iroN	1-2178/2178	===============	0/0	100	99.13	vfdb	NP_753164	(iroN) salmochelin receptor IroN [IroN (VF0230)] [Escherichia coli CFT073]
DTU_2024_1035957_100_SI_LVK_61_SE.fq.gz_flye.fasta	DTU_2024_1035957_100_SI_LVK_61_SE.fq.gz_flye_contig_2	1051054	1052094	-	ompA	1-1041/1041	===============	0/0	100	98.08	vfdb	AAF37887	(ompA) outer membrane protein A [OmpA (VF0236)] [Escherichia coli O18:K1:H7 str. RS218]
DTU_2024_1035957_100_SI_LVK_61_SE.fq.gz_flye.fasta	DTU_2024_1035957_100_SI_LVK_61_SE.fq.gz_flye_contig_3	91384	93282	+	espL1	1-1899/1899	===============	0/0	100	94.94	vfdb	NP_288154	(espL1) Type III secretion system effector espL1 [LEE encoded T3SS (SS020)] [Escherichia coli O157:H7 str. EDL933]
DTU_2024_1035957_100_SI_LVK_61_SE.fq.gz_flye.fasta	DTU_2024_1035957_100_SI_LVK_61_SE.fq.gz_flye_contig_5	2765	4345	+	espX4	1-1581/1581	========/======	2025-02-02	99.94	92.98	vfdb	NP_290672	(espX4) Type III secretion system effector EspX4 [LEE encoded T3SS (SS020)] [Escherichia coli O157:H7 str. EDL933]
DTU_2024_1035957_100_SI_LVK_61_SE.fq.gz_flye.fasta	DTU_2024_1035957_100_SI_LVK_61_SE.fq.gz_flye_contig_5	33902	35194	-	espX5	1-1293/1293	===============	0/0	100	95.59	vfdb	NP_290699	(espX5) Type III secretion system effector EspX5 [LEE encoded T3SS (SS020)] [Escherichia coli O157:H7 str. EDL933]
DTU_2024_1035957_100_SI_LVK_61_SE.fq.gz_flye.fasta	DTU_2024_1035957_100_SI_LVK_61_SE.fq.gz_flye_contig_5	271475	272077	+	fimB	1-603/603	===============	0/0	100	97.84	vfdb	NP_757239	(fimB) Type 1 fimbriae Regulatory protein fimB [Type 1 fimbriae (VF0221)] [Escherichia coli CFT073]
DTU_2024_1035957_100_SI_LVK_61_SE.fq.gz_flye.fasta	DTU_2024_1035957_100_SI_LVK_61_SE.fq.gz_flye_contig_5	272555	273151	+	fimE	1-597/597	===============	0/0	100	98.66	vfdb	NP_757240	(fimE) Type 1 fimbriae Regulatory protein fimE [Type 1 fimbriae (VF0221)] [Escherichia coli CFT073]
DTU_2024_1035957_100_SI_LVK_61_SE.fq.gz_flye.fasta	DTU_2024_1035957_100_SI_LVK_61_SE.fq.gz_flye_contig_5	273575	274180	+	fimA	1-606/606	===============	0/0	100	90.92	vfdb	NP_757241	(fimA) Type-1 fimbrial protein A chain precursor [Type 1 fimbriae (VF0221)] [Escherichia coli CFT073]
DTU_2024_1035957_100_SI_LVK_61_SE.fq.gz_flye.fasta	DTU_2024_1035957_100_SI_LVK_61_SE.fq.gz_flye_contig_5	274245	274784	+	fimI	1-540/540	===============	0/0	100	98.7	vfdb	NP_757242	(fimI) Fimbrin-like protein fimI precursor [Type 1 fimbriae (VF0221)] [Escherichia coli CFT073]
DTU_2024_1035957_100_SI_LVK_61_SE.fq.gz_flye.fasta	DTU_2024_1035957_100_SI_LVK_61_SE.fq.gz_flye_contig_5	274821	275546	+	fimC	1-726/726	===============	0/0	100	98.21	vfdb	NP_757243	(fimC) Chaperone protein fimC precursor [Type 1 fimbriae (VF0221)] [Escherichia coli CFT073]
DTU_2024_1035957_100_SI_LVK_61_SE.fq.gz_flye.fasta	DTU_2024_1035957_100_SI_LVK_61_SE.fq.gz_flye_contig_5	275613	278249	+	fimD	1-2637/2637	===============	0/0	100	98.75	vfdb	NP_757244	(fimD) Outer membrane usher protein fimD precursor [Type 1 fimbriae (VF0221)] [Escherichia coli CFT073]
DTU_2024_1035957_100_SI_LVK_61_SE.fq.gz_flye.fasta	DTU_2024_1035957_100_SI_LVK_61_SE.fq.gz_flye_contig_5	278256	278789	+	fimF	1-534/534	===============	0/0	100	96.63	vfdb	NP_757245	(fimF) FimF protein precursor [Type 1 fimbriae (VF0221)] [Escherichia coli CFT073]
DTU_2024_1035957_100_SI_LVK_61_SE.fq.gz_flye.fasta	DTU_2024_1035957_100_SI_LVK_61_SE.fq.gz_flye_contig_5	278802	279305	+	fimG	1-504/504	===============	0/0	100	97.82	vfdb	NP_757247	(fimG) FimG protein precursor [Type 1 fimbriae (VF0221)] [Escherichia coli CFT073]
DTU_2024_1035957_100_SI_LVK_61_SE.fq.gz_flye.fasta	DTU_2024_1035957_100_SI_LVK_61_SE.fq.gz_flye_contig_5	279316	280227	+	fimH	1-912/912	===============	0/0	100	97.37	vfdb	NP_757248	(fimH) FimH protein precursor [Type 1 fimbriae (VF0221)] [Escherichia coli CFT073]
DTU_2024_1035957_100_SI_LVK_61_SE.fq.gz_flye.fasta	DTU_2024_1035957_100_SI_LVK_61_SE.fq.gz_flye_contig_5	399630	401051	-	espX1	1-1422/1422	===============	0/0	100	94.66	vfdb	NP_285716	(espX1) Type III secretion system effector EspX1 [LEE encoded T3SS (SS020)] [Escherichia coli O157:H7 str. EDL933]
DTU_2024_1035957_100_SI_LVK_61_SE.fq.gz_flye.fasta	DTU_2024_1035957_100_SI_LVK_61_SE.fq.gz_flye_contig_8	36454	37005	-	papX	1-552/552	===============	0/0	100	100	vfdb	NP_755457	(papX) PapX protein regulates flagellum synthesis to repress motility [P fimbriae (CVF425)] [Escherichia coli CFT073]
DTU_2024_1035957_100_SI_LVK_61_SE.fq.gz_flye.fasta	DTU_2024_1035957_100_SI_LVK_61_SE.fq.gz_flye_contig_8	38316	38850	-	papF	1-531/531	========/======	2025-04-02	100	94.02	vfdb	NP_755459	(papF) P pilus minor subunit PapF [P fimbriae (VF0220)] [Escherichia coli CFT073]
DTU_2024_1035957_100_SI_LVK_61_SE.fq.gz_flye.fasta	DTU_2024_1035957_100_SI_LVK_61_SE.fq.gz_flye_contig_8	38895	39434	-	papE	1-540/540	===============	0/0	100	94.44	vfdb	NP_755460	(papE) P pilus minor subunit PapE [P fimbriae (VF0220)] [Escherichia coli CFT073]
DTU_2024_1035957_100_SI_LVK_61_SE.fq.gz_flye.fasta	DTU_2024_1035957_100_SI_LVK_61_SE.fq.gz_flye_contig_8	39443	39982	-	papK	1-540/540	===============	0/0	100	98.89	vfdb	NP_755461	(papK) P pilus minor subunit PapK [P fimbriae (VF0220)] [Escherichia coli CFT073]
DTU_2024_1035957_100_SI_LVK_61_SE.fq.gz_flye.fasta	DTU_2024_1035957_100_SI_LVK_61_SE.fq.gz_flye_contig_8	39989	40570	-	papJ	1-582/582	===============	0/0	100	97.77	vfdb	NP_755463	(papJ) P pilus assembly protein PapJ [P fimbriae (VF0220)] [Escherichia coli CFT073]
DTU_2024_1035957_100_SI_LVK_61_SE.fq.gz_flye.fasta	DTU_2024_1035957_100_SI_LVK_61_SE.fq.gz_flye_contig_8	40607	41212	-	papD	1-606/606	===============	0/0	100	99.34	vfdb	NP_755464	(papD) chaperone protein PapD [P fimbriae (VF0220)] [Escherichia coli CFT073]
DTU_2024_1035957_100_SI_LVK_61_SE.fq.gz_flye.fasta	DTU_2024_1035957_100_SI_LVK_61_SE.fq.gz_flye_contig_8	41412	43934	-	papC	1-2523/2523	===============	0/0	100	99.33	vfdb	NP_755465	(papC) usher protein PapC [P fimbriae (VF0220)] [Escherichia coli CFT073]
DTU_2024_1035957_100_SI_LVK_61_SE.fq.gz_flye.fasta	DTU_2024_1035957_100_SI_LVK_61_SE.fq.gz_flye_contig_8	43981	44519	-	papH	50-588/588	.==============	0/0	91.67	97.4	vfdb	NP_755466	(papH) P pilus termination subunit PapH [P fimbriae (VF0220)] [Escherichia coli CFT073]
DTU_2024_1035957_100_SI_LVK_61_SE.fq.gz_flye.fasta	DTU_2024_1035957_100_SI_LVK_61_SE.fq.gz_flye_contig_8	45387	45701	-	papB	1-315/315	===============	0/0	100	99.05	vfdb		(papB) regulatory protein PapB [P fimbriae (VF0220)] [Escherichia coli CFT073]
DTU_2024_1035957_100_SI_LVK_61_SE.fq.gz_flye.fasta	DTU_2024_1035957_100_SI_LVK_61_SE.fq.gz_flye_contig_8	65412	68456	-	cnf1	1-3045/3045	===============	0/0	100	99.57	vfdb	CAA50007	(cnf1) cytotoxic necrotizing factor 1 [CNF-1 (VF0240)] [Escherichia coli str. E-B35]
DTU_2024_1035957_100_SI_LVK_61_SE.fq.gz_flye.fasta	DTU_2024_1035957_100_SI_LVK_61_SE.fq.gz_flye_contig_8	69404	70840	-	hlyD	1-1437/1437	===============	0/0	100	98.4	vfdb	NP_755449	(hlyD) Hemolysin D [Hemolysin (VF0225)] [Escherichia coli CFT073]
DTU_2024_1035957_100_SI_LVK_61_SE.fq.gz_flye.fasta	DTU_2024_1035957_100_SI_LVK_61_SE.fq.gz_flye_contig_8	70859	72982	-	hlyB	1-2124/2124	===============	0/0	100	99.53	vfdb	NP_755448	(hlyB) Hemolysin B [Hemolysin (VF0225)] [Escherichia coli CFT073]
DTU_2024_1035957_100_SI_LVK_61_SE.fq.gz_flye.fasta	DTU_2024_1035957_100_SI_LVK_61_SE.fq.gz_flye_contig_8	73053	76127	-	hlyA	1-3075/3075	===============	0/0	100	99.06	vfdb	NP_755445	(hlyA) Hemolysin A [Hemolysin (VF0225)] [Escherichia coli CFT073]
DTU_2024_1035957_100_SI_LVK_61_SE.fq.gz_flye.fasta	DTU_2024_1035957_100_SI_LVK_61_SE.fq.gz_flye_contig_8	76139	76812	-	hlyC	1-675/675	========/======	2025-01-01	99.85	98.96	vfdb	NP_755444	(hlyC) Hemolysin C [Hemolysin (VF0225)] [Escherichia coli CFT073]
DTU_2024_1035958_100_SI_LVK_74_SE.fq.gz_flye.fasta	DTU_2024_1035958_100_SI_LVK_74_SE.fq.gz_flye_contig_18	199828	201249	-	espX1	1-1422/1422	========/======	2025-02-02	99.93	95.29	vfdb	NP_285716	(espX1) Type III secretion system effector EspX1 [LEE encoded T3SS (SS020)] [Escherichia coli O157:H7 str. EDL933]
DTU_2024_1035958_100_SI_LVK_74_SE.fq.gz_flye.fasta	DTU_2024_1035958_100_SI_LVK_74_SE.fq.gz_flye_contig_18	239516	240297	+	espY1	1-753/753	========/======	1931-03-01	99.87	90.42	vfdb	NP_285753	(espY1) Type III secretion system effector EspY1 [LEE encoded T3SS (SS020)] [Escherichia coli O157:H7 str. EDL933]
DTU_2024_1035958_100_SI_LVK_74_SE.fq.gz_flye.fasta	DTU_2024_1035958_100_SI_LVK_74_SE.fq.gz_flye_contig_18	462150	464241	-	espL4	1-2092/2187	===============	0/0	95.66	97.23	vfdb	NP_290644	(espL4) Type III secretion system effector EspL4 [LEE encoded T3SS (SS020)] [Escherichia coli O157:H7 str. EDL933]
DTU_2024_1035958_100_SI_LVK_74_SE.fq.gz_flye.fasta	DTU_2024_1035958_100_SI_LVK_74_SE.fq.gz_flye_contig_18	492457	494037	+	espX4	1-1581/1581	===============	0/0	100	96.39	vfdb	NP_290672	(espX4) Type III secretion system effector EspX4 [LEE encoded T3SS (SS020)] [Escherichia coli O157:H7 str. EDL933]
DTU_2024_1035958_100_SI_LVK_74_SE.fq.gz_flye.fasta	DTU_2024_1035958_100_SI_LVK_74_SE.fq.gz_flye_contig_18	523537	524829	-	espX5	1-1293/1293	===============	0/0	100	96.6	vfdb	NP_290699	(espX5) Type III secretion system effector EspX5 [LEE encoded T3SS (SS020)] [Escherichia coli O157:H7 str. EDL933]
DTU_2024_1035958_100_SI_LVK_74_SE.fq.gz_flye.fasta	DTU_2024_1035958_100_SI_LVK_74_SE.fq.gz_flye_contig_18	744221	744759	+	fimI	1-540/540	========/======	2025-01-01	99.81	98.7	vfdb	NP_757242	(fimI) Fimbrin-like protein fimI precursor [Type 1 fimbriae (VF0221)] [Escherichia coli CFT073]
DTU_2024_1035958_100_SI_LVK_74_SE.fq.gz_flye.fasta	DTU_2024_1035958_100_SI_LVK_74_SE.fq.gz_flye_contig_18	744796	745521	+	fimC	1-726/726	===============	0/0	100	98.35	vfdb	NP_757243	(fimC) Chaperone protein fimC precursor [Type 1 fimbriae (VF0221)] [Escherichia coli CFT073]
DTU_2024_1035958_100_SI_LVK_74_SE.fq.gz_flye.fasta	DTU_2024_1035958_100_SI_LVK_74_SE.fq.gz_flye_contig_18	745588	748224	+	fimD	1-2637/2637	===============	0/0	100	98.48	vfdb	NP_757244	(fimD) Outer membrane usher protein fimD precursor [Type 1 fimbriae (VF0221)] [Escherichia coli CFT073]
DTU_2024_1035958_100_SI_LVK_74_SE.fq.gz_flye.fasta	DTU_2024_1035958_100_SI_LVK_74_SE.fq.gz_flye_contig_18	748231	748764	+	fimF	1-534/534	===============	0/0	100	97.38	vfdb	NP_757245	(fimF) FimF protein precursor [Type 1 fimbriae (VF0221)] [Escherichia coli CFT073]
DTU_2024_1035958_100_SI_LVK_74_SE.fq.gz_flye.fasta	DTU_2024_1035958_100_SI_LVK_74_SE.fq.gz_flye_contig_18	748777	749280	+	fimG	1-504/504	===============	0/0	100	98.02	vfdb	NP_757247	(fimG) FimG protein precursor [Type 1 fimbriae (VF0221)] [Escherichia coli CFT073]
DTU_2024_1035958_100_SI_LVK_74_SE.fq.gz_flye.fasta	DTU_2024_1035958_100_SI_LVK_74_SE.fq.gz_flye_contig_18	749291	750202	+	fimH	1-912/912	===============	0/0	100	97.37	vfdb	NP_757248	(fimH) FimH protein precursor [Type 1 fimbriae (VF0221)] [Escherichia coli CFT073]
DTU_2024_1035958_100_SI_LVK_74_SE.fq.gz_flye.fasta	DTU_2024_1035958_100_SI_LVK_74_SE.fq.gz_flye_contig_20	70967	71720	-	yagV/ecpE	1-754/756	===============	0/0	99.74	97.08	vfdb	NP_286006	(yagV/ecpE) E. coli common pilus chaperone EcpE [ECP (VF0404)] [Escherichia coli O157:H7 str. EDL933]
DTU_2024_1035958_100_SI_LVK_74_SE.fq.gz_flye.fasta	DTU_2024_1035958_100_SI_LVK_74_SE.fq.gz_flye_contig_20	71644	73287	-	yagW/ecpD	1-1644/1644	===============	0/0	100	99.09	vfdb	NP_286007	(yagW/ecpD) polymerized tip adhesin of ECP fibers [ECP (VF0404)] [Escherichia coli O157:H7 str. EDL933]
DTU_2024_1035958_100_SI_LVK_74_SE.fq.gz_flye.fasta	DTU_2024_1035958_100_SI_LVK_74_SE.fq.gz_flye_contig_20	73277	75802	-	yagX/ecpC	1-2526/2526	===============	0/0	100	98.77	vfdb	NP_286008	(yagX/ecpC) E. coli common pilus usher EcpC [ECP (VF0404)] [Escherichia coli O157:H7 str. EDL933]
DTU_2024_1035958_100_SI_LVK_74_SE.fq.gz_flye.fasta	DTU_2024_1035958_100_SI_LVK_74_SE.fq.gz_flye_contig_20	75828	76496	-	yagY/ecpB	1-669/669	===============	0/0	100	98.06	vfdb	NP_286009	(yagY/ecpB) E. coli common pilus chaperone EcpB [ECP (VF0404)] [Escherichia coli O157:H7 str. EDL933]
DTU_2024_1035958_100_SI_LVK_74_SE.fq.gz_flye.fasta	DTU_2024_1035958_100_SI_LVK_74_SE.fq.gz_flye_contig_20	76554	77141	-	yagZ/ecpA	1-588/588	===============	0/0	100	98.81	vfdb	NP_286010	(yagZ/ecpA) E. coli common pilus structural subunit EcpA [ECP (VF0404)] [Escherichia coli O157:H7 str. EDL933]
DTU_2024_1035958_100_SI_LVK_74_SE.fq.gz_flye.fasta	DTU_2024_1035958_100_SI_LVK_74_SE.fq.gz_flye_contig_20	77216	77806	-	ykgK/ecpR	1-591/591	===============	0/0	100	96.95	vfdb	NP_286011	(ykgK/ecpR) regulator protein EcpR [ECP (VF0404)] [Escherichia coli O157:H7 str. EDL933]
DTU_2024_1035958_100_SI_LVK_74_SE.fq.gz_flye.fasta	DTU_2024_1035958_100_SI_LVK_74_SE.fq.gz_flye_contig_20	80826	85074	+	fdeC	1-4246/4251	========/======	2025-03-01	99.88	94.21	vfdb	YP_002390132	(fdeC) adhesin FdeC [FdeC (VF0506)] [Escherichia coli O45:K1:H7 str. S88]
DTU_2024_1035958_100_SI_LVK_74_SE.fq.gz_flye.fasta	DTU_2024_1035958_100_SI_LVK_74_SE.fq.gz_flye_contig_20	359096	359866	-	entD	1-771/771	===============	0/0	100	95.07	vfdb	NP_752599	(entD) phosphopantetheinyl transferase component of enterobactin synthase multienzyme complex [Enterobactin (VF0228)] [Escherichia coli CFT073]
DTU_2024_1035958_100_SI_LVK_74_SE.fq.gz_flye.fasta	DTU_2024_1035958_100_SI_LVK_74_SE.fq.gz_flye_contig_20	359891	362131	-	fepA	1-2241/2241	===============	0/0	100	96.74	vfdb	NP_752600	(fepA) ferrienterobactin outer membrane transporter [Enterobactin (VF0228)] [Escherichia coli CFT073]
DTU_2024_1035958_100_SI_LVK_74_SE.fq.gz_flye.fasta	DTU_2024_1035958_100_SI_LVK_74_SE.fq.gz_flye_contig_20	362374	363576	+	fes	1-1203/1203	===============	0/0	100	96.67	vfdb	NP_752602	(fes) enterobactin/ferric enterobactin esterase [enterobactin (IA019)] [Escherichia coli CFT073]
DTU_2024_1035958_100_SI_LVK_74_SE.fq.gz_flye.fasta	DTU_2024_1035958_100_SI_LVK_74_SE.fq.gz_flye_contig_20	363794	367647	+	entF	1-3854/3882	===============	0/0	99.28	95.64	vfdb	NP_752604	(entF) enterobactin synthase multienzyme complex component ATP-dependent [Enterobactin (VF0228)] [Escherichia coli CFT073]
DTU_2024_1035958_100_SI_LVK_74_SE.fq.gz_flye.fasta	DTU_2024_1035958_100_SI_LVK_74_SE.fq.gz_flye_contig_20	370849	371664	-	fepC	1-816/816	===============	0/0	100	97.3	vfdb	NP_752606	(fepC) ferrienterobactin ABC transporter ATPase [Enterobactin (VF0228)] [Escherichia coli CFT073]
DTU_2024_1035958_100_SI_LVK_74_SE.fq.gz_flye.fasta	DTU_2024_1035958_100_SI_LVK_74_SE.fq.gz_flye_contig_20	371661	372653	-	fepG	1-993/993	===============	0/0	100	94.06	vfdb	NP_752607	(fepG) iron-enterobactin ABC transporter permease [Enterobactin (VF0228)] [Escherichia coli CFT073]
DTU_2024_1035958_100_SI_LVK_74_SE.fq.gz_flye.fasta	DTU_2024_1035958_100_SI_LVK_74_SE.fq.gz_flye_contig_20	372650	373666	-	fepD	1-1017/1017	===============	0/0	100	96.07	vfdb	NP_752608	(fepD) ferrienterobactin ABC transporter permease [Enterobactin (VF0228)] [Escherichia coli CFT073]
DTU_2024_1035958_100_SI_LVK_74_SE.fq.gz_flye.fasta	DTU_2024_1035958_100_SI_LVK_74_SE.fq.gz_flye_contig_20	373765	375015	+	entS	1-1251/1251	===============	0/0	100	95.36	vfdb	NP_752609	(entS) enterobactin exporter iron-regulated [enterobactin (IA019)] [Escherichia coli CFT073]
DTU_2024_1035958_100_SI_LVK_74_SE.fq.gz_flye.fasta	DTU_2024_1035958_100_SI_LVK_74_SE.fq.gz_flye_contig_20	375019	375975	-	fepB	1-957/957	===============	0/0	100	97.49	vfdb	NP_752610	(fepB) ferrienterobactin ABC transporter periplasmic binding protein [Enterobactin (VF0228)] [Escherichia coli CFT073]
DTU_2024_1035958_100_SI_LVK_74_SE.fq.gz_flye.fasta	DTU_2024_1035958_100_SI_LVK_74_SE.fq.gz_flye_contig_20	376338	377525	+	entC	1-1188/1188	===============	0/0	100	97.9	vfdb	NP_752611	(entC) isochorismate synthase 1 [Enterobactin (VF0228)] [Escherichia coli CFT073]
DTU_2024_1035958_100_SI_LVK_74_SE.fq.gz_flye.fasta	DTU_2024_1035958_100_SI_LVK_74_SE.fq.gz_flye_contig_20	377535	379145	+	entE	1-1611/1611	===============	0/0	100	95.41	vfdb	NP_752612	(entE) 23-dihydroxybenzoate-AMP ligase component of enterobactin synthase multienzyme complex [Enterobactin (VF0228)] [Escherichia coli CFT073]
DTU_2024_1035958_100_SI_LVK_74_SE.fq.gz_flye.fasta	DTU_2024_1035958_100_SI_LVK_74_SE.fq.gz_flye_contig_20	379159	380016	+	entB	1-858/858	===============	0/0	100	98.14	vfdb	NP_752613	(entB) isochorismatase [Enterobactin (VF0228)] [Escherichia coli CFT073]
DTU_2024_1035958_100_SI_LVK_74_SE.fq.gz_flye.fasta	DTU_2024_1035958_100_SI_LVK_74_SE.fq.gz_flye_contig_20	380016	380762	+	entA	1-747/747	===============	0/0	100	95.72	vfdb	NP_752614	(entA) 23-dihydro-23-dihydroxybenzoate dehydrogenase [Enterobactin (VF0228)] [Escherichia coli CFT073]
DTU_2024_1035958_100_SI_LVK_74_SE.fq.gz_flye.fasta	DTU_2024_1035958_100_SI_LVK_74_SE.fq.gz_flye_contig_23	181694	183122	-	aslA	1-1428/1428	========/======	2025-01-01	100	92.86	vfdb	AAG10151	(aslA) putative arylsulfatase [AslA (VF0238)] [Escherichia coli O18:K1:H7 str. RS218]
DTU_2024_1035958_100_SI_LVK_74_SE.fq.gz_flye.fasta	DTU_2024_1035958_100_SI_LVK_74_SE.fq.gz_flye_contig_24	117032	117989	+	stx2A	1-958/960	===============	0/0	99.79	94.36	vfdb	NP_286976	(stx2A) shiga-like toxin II A subunit encoded by bacteriophage BP-933W [Stx (VF0206)] [Escherichia coli O157:H7 str. EDL933]
DTU_2024_1035958_100_SI_LVK_74_SE.fq.gz_flye.fasta	DTU_2024_1035958_100_SI_LVK_74_SE.fq.gz_flye_contig_25	171789	173688	-	espL1	1-1899/1899	========/======	2025-01-01	100	97.53	vfdb	NP_288154	(espL1) Type III secretion system effector espL1 [LEE encoded T3SS (SS020)] [Escherichia coli O157:H7 str. EDL933]
DTU_2024_1035958_100_SI_LVK_74_SE.fq.gz_flye.fasta	DTU_2024_1035958_100_SI_LVK_74_SE.fq.gz_flye_contig_3	129188	130228	-	ompA	1-1041/1041	===============	0/0	100	98.08	vfdb	AAF37887	(ompA) outer membrane protein A [OmpA (VF0236)] [Escherichia coli O18:K1:H7 str. RS218]
DTU_2024_1035958_100_SI_LVK_74_SE.fq.gz_flye.fasta	DTU_2024_1035958_100_SI_LVK_74_SE.fq.gz_flye_contig_35	6227	9301	+	hlyA	1-3075/3075	===============	0/0	100	96.88	vfdb	NP_755445	(hlyA) Hemolysin A [Hemolysin (VF0225)] [Escherichia coli CFT073]
DTU_2024_1035958_100_SI_LVK_74_SE.fq.gz_flye.fasta	DTU_2024_1035958_100_SI_LVK_74_SE.fq.gz_flye_contig_35	9373	11496	+	hlyB	1-2124/2124	===============	0/0	100	98.12	vfdb	NP_755448	(hlyB) Hemolysin B [Hemolysin (VF0225)] [Escherichia coli CFT073]
DTU_2024_1035958_100_SI_LVK_74_SE.fq.gz_flye.fasta	DTU_2024_1035958_100_SI_LVK_74_SE.fq.gz_flye_contig_35	11515	12951	+	hlyD	1-1437/1437	===============	0/0	100	96.73	vfdb	NP_755449	(hlyD) Hemolysin D [Hemolysin (VF0225)] [Escherichia coli CFT073]
DTU_2024_1035958_100_SI_LVK_74_SE.fq.gz_flye.fasta	DTU_2024_1035958_100_SI_LVK_74_SE.fq.gz_flye_contig_5	314845	315267	-	gspM	1-423/423	===============	0/0	100	98.34	vfdb	YP_404609	(gspM) general secretion pathway protein M [T2SS (VF0333)] [Shigella dysenteriae Sd197]
DTU_2024_1035958_100_SI_LVK_74_SE.fq.gz_flye.fasta	DTU_2024_1035958_100_SI_LVK_74_SE.fq.gz_flye_contig_5	315383	316243	-	gspL	1-861/861	===============	0/0	100	97.1	vfdb	YP_404608	(gspL) general secretion pathway protein L [T2SS (VF0333)] [Shigella dysenteriae Sd197]
DTU_2024_1035958_100_SI_LVK_74_SE.fq.gz_flye.fasta	DTU_2024_1035958_100_SI_LVK_74_SE.fq.gz_flye_contig_5	316558	317535	-	gspK	1-978/978	===============	0/0	100	96.93	vfdb	YP_404607	(gspK) general secretion pathway protein K [T2SS (VF0333)] [Shigella dysenteriae Sd197]
DTU_2024_1035958_100_SI_LVK_74_SE.fq.gz_flye.fasta	DTU_2024_1035958_100_SI_LVK_74_SE.fq.gz_flye_contig_5	317532	318101	-	gspJ	1-570/570	===============	0/0	100	96.67	vfdb	YP_404606	(gspJ) general secretion pathway protein J [T2SS (VF0333)] [Shigella dysenteriae Sd197]
DTU_2024_1035958_100_SI_LVK_74_SE.fq.gz_flye.fasta	DTU_2024_1035958_100_SI_LVK_74_SE.fq.gz_flye_contig_5	318134	318505	-	gspI	1-372/372	===============	0/0	100	95.16	vfdb	YP_404605	(gspI) general secretion pathway protein I [T2SS (VF0333)] [Shigella dysenteriae Sd197]
DTU_2024_1035958_100_SI_LVK_74_SE.fq.gz_flye.fasta	DTU_2024_1035958_100_SI_LVK_74_SE.fq.gz_flye_contig_5	318502	319033	-	gspH	1-531/531	========/======	2025-01-01	100	95.49	vfdb	YP_404604	(gspH) general secretion pathway protein H [T2SS (VF0333)] [Shigella dysenteriae Sd197]
DTU_2024_1035958_100_SI_LVK_74_SE.fq.gz_flye.fasta	DTU_2024_1035958_100_SI_LVK_74_SE.fq.gz_flye_contig_5	319070	319525	-	gspG	1-456/456	===============	0/0	100	94.96	vfdb	YP_404603	(gspG) general secretion pathway protein G [T2SS (VF0333)] [Shigella dysenteriae Sd197]
DTU_2024_1035958_100_SI_LVK_74_SE.fq.gz_flye.fasta	DTU_2024_1035958_100_SI_LVK_74_SE.fq.gz_flye_contig_5	319566	320767	-	gspF	1-1200/1200	========/======	2025-02-02	100	95.84	vfdb	YP_404602	(gspF) general secretion pathway protein F [T2SS (VF0333)] [Shigella dysenteriae Sd197]
DTU_2024_1035958_100_SI_LVK_74_SE.fq.gz_flye.fasta	DTU_2024_1035958_100_SI_LVK_74_SE.fq.gz_flye_contig_5	320767	322260	-	gspE	1-1494/1494	===============	0/0	100	96.25	vfdb	YP_404601	(gspE) general secretion pathway protein E [T2SS (VF0333)] [Shigella dysenteriae Sd197]
DTU_2024_1035958_100_SI_LVK_74_SE.fq.gz_flye.fasta	DTU_2024_1035958_100_SI_LVK_74_SE.fq.gz_flye_contig_5	322260	324111	-	gspD	1-1836/1836	========/======	2016-02-01	100	95.68	vfdb	YP_404600	(gspD) general secretion pathway protein D [T2SS (VF0333)] [Shigella dysenteriae Sd197]
DTU_2024_1035958_100_SI_LVK_74_SE.fq.gz_flye.fasta	DTU_2024_1035958_100_SI_LVK_74_SE.fq.gz_flye_contig_5	324351	325183	-	gspC	1-831/831	========/======	2025-02-02	100	95.08	vfdb	YP_404599	(gspC) general secretion pathway protein C [T2SS (VF0333)] [Shigella dysenteriae Sd197]
DTU_2024_1035959_100_SI_LVK_80_SE.fq.gz_flye.fasta	DTU_2024_1035959_100_SI_LVK_80_SE.fq.gz_flye_contig_10	286021	287441	+	espX1	1-1422/1422	========/======	2025-01-01	99.93	94.58	vfdb	NP_285716	(espX1) Type III secretion system effector EspX1 [LEE encoded T3SS (SS020)] [Escherichia coli O157:H7 str. EDL933]
DTU_2024_1035959_100_SI_LVK_80_SE.fq.gz_flye.fasta	DTU_2024_1035959_100_SI_LVK_80_SE.fq.gz_flye_contig_10	397300	398211	-	fimH	1-912/912	===============	0/0	100	97.26	vfdb	NP_757248	(fimH) FimH protein precursor [Type 1 fimbriae (VF0221)] [Escherichia coli CFT073]
DTU_2024_1035959_100_SI_LVK_80_SE.fq.gz_flye.fasta	DTU_2024_1035959_100_SI_LVK_80_SE.fq.gz_flye_contig_10	398222	398725	-	fimG	1-504/504	===============	0/0	100	98.02	vfdb	NP_757247	(fimG) FimG protein precursor [Type 1 fimbriae (VF0221)] [Escherichia coli CFT073]
DTU_2024_1035959_100_SI_LVK_80_SE.fq.gz_flye.fasta	DTU_2024_1035959_100_SI_LVK_80_SE.fq.gz_flye_contig_10	398738	399271	-	fimF	1-534/534	===============	0/0	100	97.38	vfdb	NP_757245	(fimF) FimF protein precursor [Type 1 fimbriae (VF0221)] [Escherichia coli CFT073]
DTU_2024_1035959_100_SI_LVK_80_SE.fq.gz_flye.fasta	DTU_2024_1035959_100_SI_LVK_80_SE.fq.gz_flye_contig_10	399278	401914	-	fimD	1-2637/2637	===============	0/0	100	98.6	vfdb	NP_757244	(fimD) Outer membrane usher protein fimD precursor [Type 1 fimbriae (VF0221)] [Escherichia coli CFT073]
DTU_2024_1035959_100_SI_LVK_80_SE.fq.gz_flye.fasta	DTU_2024_1035959_100_SI_LVK_80_SE.fq.gz_flye_contig_10	401981	402706	-	fimC	1-726/726	===============	0/0	100	98.62	vfdb	NP_757243	(fimC) Chaperone protein fimC precursor [Type 1 fimbriae (VF0221)] [Escherichia coli CFT073]
DTU_2024_1035959_100_SI_LVK_80_SE.fq.gz_flye.fasta	DTU_2024_1035959_100_SI_LVK_80_SE.fq.gz_flye_contig_10	402743	403282	-	fimI	1-540/540	===============	0/0	100	98.89	vfdb	NP_757242	(fimI) Fimbrin-like protein fimI precursor [Type 1 fimbriae (VF0221)] [Escherichia coli CFT073]
DTU_2024_1035959_100_SI_LVK_80_SE.fq.gz_flye.fasta	DTU_2024_1035959_100_SI_LVK_80_SE.fq.gz_flye_contig_10	404384	404978	-	fimE	1-595/597	===============	0/0	99.66	99.5	vfdb	NP_757240	(fimE) Type 1 fimbriae Regulatory protein fimE [Type 1 fimbriae (VF0221)] [Escherichia coli CFT073]
DTU_2024_1035959_100_SI_LVK_80_SE.fq.gz_flye.fasta	DTU_2024_1035959_100_SI_LVK_80_SE.fq.gz_flye_contig_10	405455	406057	-	fimB	1-603/603	===============	0/0	100	98.18	vfdb	NP_757239	(fimB) Type 1 fimbriae Regulatory protein fimB [Type 1 fimbriae (VF0221)] [Escherichia coli CFT073]
DTU_2024_1035959_100_SI_LVK_80_SE.fq.gz_flye.fasta	DTU_2024_1035959_100_SI_LVK_80_SE.fq.gz_flye_contig_10	690281	691573	+	espX5	1-1293/1293	===============	0/0	100	95.59	vfdb	NP_290699	(espX5) Type III secretion system effector EspX5 [LEE encoded T3SS (SS020)] [Escherichia coli O157:H7 str. EDL933]
DTU_2024_1035959_100_SI_LVK_80_SE.fq.gz_flye.fasta	DTU_2024_1035959_100_SI_LVK_80_SE.fq.gz_flye_contig_10	721123	722703	-	espX4	1-1581/1581	========/======	2025-02-02	99.94	93.05	vfdb	NP_290672	(espX4) Type III secretion system effector EspX4 [LEE encoded T3SS (SS020)] [Escherichia coli O157:H7 str. EDL933]
DTU_2024_1035959_100_SI_LVK_80_SE.fq.gz_flye.fasta	DTU_2024_1035959_100_SI_LVK_80_SE.fq.gz_flye_contig_2	105823	106653	+	gspC	1-831/831	===============	0/0	100	94.58	vfdb	YP_404599	(gspC) general secretion pathway protein C [T2SS (VF0333)] [Shigella dysenteriae Sd197]
DTU_2024_1035959_100_SI_LVK_80_SE.fq.gz_flye.fasta	DTU_2024_1035959_100_SI_LVK_80_SE.fq.gz_flye_contig_2	106893	108743	+	gspD	1-1836/1836	========/======	2015-01-01	100	97.46	vfdb	YP_404600	(gspD) general secretion pathway protein D [T2SS (VF0333)] [Shigella dysenteriae Sd197]
DTU_2024_1035959_100_SI_LVK_80_SE.fq.gz_flye.fasta	DTU_2024_1035959_100_SI_LVK_80_SE.fq.gz_flye_contig_2	108743	110236	+	gspE	1-1494/1494	===============	0/0	100	96.65	vfdb	YP_404601	(gspE) general secretion pathway protein E [T2SS (VF0333)] [Shigella dysenteriae Sd197]
DTU_2024_1035959_100_SI_LVK_80_SE.fq.gz_flye.fasta	DTU_2024_1035959_100_SI_LVK_80_SE.fq.gz_flye_contig_2	110236	111435	+	gspF	1-1200/1200	===============	0/0	100	96.67	vfdb	YP_404602	(gspF) general secretion pathway protein F [T2SS (VF0333)] [Shigella dysenteriae Sd197]
DTU_2024_1035959_100_SI_LVK_80_SE.fq.gz_flye.fasta	DTU_2024_1035959_100_SI_LVK_80_SE.fq.gz_flye_contig_2	111476	111931	+	gspG	1-456/456	===============	0/0	100	96.27	vfdb	YP_404603	(gspG) general secretion pathway protein G [T2SS (VF0333)] [Shigella dysenteriae Sd197]
DTU_2024_1035959_100_SI_LVK_80_SE.fq.gz_flye.fasta	DTU_2024_1035959_100_SI_LVK_80_SE.fq.gz_flye_contig_2	111968	112498	+	gspH	1-531/531	===============	0/0	100	95.48	vfdb	YP_404604	(gspH) general secretion pathway protein H [T2SS (VF0333)] [Shigella dysenteriae Sd197]
DTU_2024_1035959_100_SI_LVK_80_SE.fq.gz_flye.fasta	DTU_2024_1035959_100_SI_LVK_80_SE.fq.gz_flye_contig_2	112495	112866	+	gspI	1-372/372	===============	0/0	100	95.16	vfdb	YP_404605	(gspI) general secretion pathway protein I [T2SS (VF0333)] [Shigella dysenteriae Sd197]
DTU_2024_1035959_100_SI_LVK_80_SE.fq.gz_flye.fasta	DTU_2024_1035959_100_SI_LVK_80_SE.fq.gz_flye_contig_2	112899	113468	+	gspJ	1-570/570	===============	0/0	100	97.19	vfdb	YP_404606	(gspJ) general secretion pathway protein J [T2SS (VF0333)] [Shigella dysenteriae Sd197]
DTU_2024_1035959_100_SI_LVK_80_SE.fq.gz_flye.fasta	DTU_2024_1035959_100_SI_LVK_80_SE.fq.gz_flye_contig_2	113465	114442	+	gspK	1-978/978	===============	0/0	100	97.65	vfdb	YP_404607	(gspK) general secretion pathway protein K [T2SS (VF0333)] [Shigella dysenteriae Sd197]
DTU_2024_1035959_100_SI_LVK_80_SE.fq.gz_flye.fasta	DTU_2024_1035959_100_SI_LVK_80_SE.fq.gz_flye_contig_2	114757	115617	+	gspL	1-861/861	===============	0/0	100	96.86	vfdb	YP_404608	(gspL) general secretion pathway protein L [T2SS (VF0333)] [Shigella dysenteriae Sd197]
DTU_2024_1035959_100_SI_LVK_80_SE.fq.gz_flye.fasta	DTU_2024_1035959_100_SI_LVK_80_SE.fq.gz_flye_contig_2	115733	116155	+	gspM	1-423/423	===============	0/0	100	97.16	vfdb	YP_404609	(gspM) general secretion pathway protein M [T2SS (VF0333)] [Shigella dysenteriae Sd197]
DTU_2024_1035959_100_SI_LVK_80_SE.fq.gz_flye.fasta	DTU_2024_1035959_100_SI_LVK_80_SE.fq.gz_flye_contig_2	131162	131278	+	astA	1-117/117	===============	0/0	100	95.73	vfdb	BAA94855	(astA) heat-stable enterotoxin 1 [EAST1 (VF0216)] [Escherichia coli O44:H18 042]
DTU_2024_1035959_100_SI_LVK_80_SE.fq.gz_flye.fasta	DTU_2024_1035959_100_SI_LVK_80_SE.fq.gz_flye_contig_20	38979	40283	-	ybtS	1-1305/1305	===============	0/0	100	99.62	vfdb	NP_405477	(ybtS) salicylate synthase Irp9 [Yersiniabactin (VF0136)] [Yersinia pestis CO92]
DTU_2024_1035959_100_SI_LVK_80_SE.fq.gz_flye.fasta	DTU_2024_1035959_100_SI_LVK_80_SE.fq.gz_flye_contig_20	40311	41591	-	ybtX	1-1281/1281	===============	0/0	100	99.69	vfdb	NP_405476	(ybtX) putative signal transducer [Yersiniabactin (VF0136)] [Yersinia pestis CO92]
DTU_2024_1035959_100_SI_LVK_80_SE.fq.gz_flye.fasta	DTU_2024_1035959_100_SI_LVK_80_SE.fq.gz_flye_contig_20	41584	43386	-	ybtQ	1-1803/1803	===============	0/0	100	99.72	vfdb	NP_405475	(ybtQ) inner membrane ABC-transporter YbtQ [Yersiniabactin (VF0136)] [Yersinia pestis CO92]
DTU_2024_1035959_100_SI_LVK_80_SE.fq.gz_flye.fasta	DTU_2024_1035959_100_SI_LVK_80_SE.fq.gz_flye_contig_20	43373	45175	-	ybtP	1-1803/1803	===============	0/0	100	99.67	vfdb	NP_405474	(ybtP) lipoprotein inner membrane ABC-transporter [Yersiniabactin (VF0136)] [Yersinia pestis CO92]
DTU_2024_1035959_100_SI_LVK_80_SE.fq.gz_flye.fasta	DTU_2024_1035959_100_SI_LVK_80_SE.fq.gz_flye_contig_20	45342	46301	+	ybtA	1-960/960	===============	0/0	100	99.48	vfdb	NP_405473	(ybtA) transcriptional regulator YbtA [Yersiniabactin (VF0136)] [Yersinia pestis CO92]
DTU_2024_1035959_100_SI_LVK_80_SE.fq.gz_flye.fasta	DTU_2024_1035959_100_SI_LVK_80_SE.fq.gz_flye_contig_20	46492	52599	+	irp2	1-6108/6108	===============	0/0	100	99.8	vfdb	NP_405472	(irp2) yersiniabactin biosynthetic protein Irp2 [Yersiniabactin (VF0136)] [Yersinia pestis CO92]
DTU_2024_1035959_100_SI_LVK_80_SE.fq.gz_flye.fasta	DTU_2024_1035959_100_SI_LVK_80_SE.fq.gz_flye_contig_20	52687	62178	+	irp1	1-9492/9492	===============	0/0	100	99.86	vfdb	NP_405471	(irp1) yersiniabactin biosynthetic protein Irp1 [Yersiniabactin (VF0136)] [Yersinia pestis CO92]
DTU_2024_1035959_100_SI_LVK_80_SE.fq.gz_flye.fasta	DTU_2024_1035959_100_SI_LVK_80_SE.fq.gz_flye_contig_20	62175	63275	+	ybtU	1-1101/1101	===============	0/0	100	99.73	vfdb	NP_405470	(ybtU) yersiniabactin biosynthetic protein YbtU [Yersiniabactin (VF0136)] [Yersinia pestis CO92]
DTU_2024_1035959_100_SI_LVK_80_SE.fq.gz_flye.fasta	DTU_2024_1035959_100_SI_LVK_80_SE.fq.gz_flye_contig_20	63272	64075	+	ybtT	1-804/804	===============	0/0	100	99.75	vfdb	NP_405469	(ybtT) yersiniabactin biosynthetic protein YbtT [Yersiniabactin (VF0136)] [Yersinia pestis CO92]
DTU_2024_1035959_100_SI_LVK_80_SE.fq.gz_flye.fasta	DTU_2024_1035959_100_SI_LVK_80_SE.fq.gz_flye_contig_20	64079	65656	+	ybtE	1-1578/1578	===============	0/0	100	99.81	vfdb	NP_405468	(ybtE) yersiniabactin siderophore biosynthetic protein [Yersiniabactin (VF0136)] [Yersinia pestis CO92]
DTU_2024_1035959_100_SI_LVK_80_SE.fq.gz_flye.fasta	DTU_2024_1035959_100_SI_LVK_80_SE.fq.gz_flye_contig_20	65787	67808	+	fyuA	1-2022/2022	===============	0/0	100	99.9	vfdb	NP_405467	(fyuA) pesticin/yersiniabactin receptor protein [Yersiniabactin (VF0136)] [Yersinia pestis CO92]
DTU_2024_1035959_100_SI_LVK_80_SE.fq.gz_flye.fasta	DTU_2024_1035959_100_SI_LVK_80_SE.fq.gz_flye_contig_21	46912	47665	-	yagV/ecpE	1-754/756	===============	0/0	99.74	96.82	vfdb	NP_286006	(yagV/ecpE) E. coli common pilus chaperone EcpE [ECP (VF0404)] [Escherichia coli O157:H7 str. EDL933]
DTU_2024_1035959_100_SI_LVK_80_SE.fq.gz_flye.fasta	DTU_2024_1035959_100_SI_LVK_80_SE.fq.gz_flye_contig_21	47589	49232	-	yagW/ecpD	1-1644/1644	===============	0/0	100	98.6	vfdb	NP_286007	(yagW/ecpD) polymerized tip adhesin of ECP fibers [ECP (VF0404)] [Escherichia coli O157:H7 str. EDL933]
DTU_2024_1035959_100_SI_LVK_80_SE.fq.gz_flye.fasta	DTU_2024_1035959_100_SI_LVK_80_SE.fq.gz_flye_contig_21	49222	51747	-	yagX/ecpC	1-2526/2526	===============	0/0	100	98.73	vfdb	NP_286008	(yagX/ecpC) E. coli common pilus usher EcpC [ECP (VF0404)] [Escherichia coli O157:H7 str. EDL933]
DTU_2024_1035959_100_SI_LVK_80_SE.fq.gz_flye.fasta	DTU_2024_1035959_100_SI_LVK_80_SE.fq.gz_flye_contig_21	51773	52441	-	yagY/ecpB	1-669/669	===============	0/0	100	98.8	vfdb	NP_286009	(yagY/ecpB) E. coli common pilus chaperone EcpB [ECP (VF0404)] [Escherichia coli O157:H7 str. EDL933]
DTU_2024_1035959_100_SI_LVK_80_SE.fq.gz_flye.fasta	DTU_2024_1035959_100_SI_LVK_80_SE.fq.gz_flye_contig_21	52499	53086	-	yagZ/ecpA	1-588/588	===============	0/0	100	99.32	vfdb	NP_286010	(yagZ/ecpA) E. coli common pilus structural subunit EcpA [ECP (VF0404)] [Escherichia coli O157:H7 str. EDL933]
DTU_2024_1035959_100_SI_LVK_80_SE.fq.gz_flye.fasta	DTU_2024_1035959_100_SI_LVK_80_SE.fq.gz_flye_contig_21	53161	53751	-	ykgK/ecpR	1-591/591	===============	0/0	100	97.29	vfdb	NP_286011	(ykgK/ecpR) regulator protein EcpR [ECP (VF0404)] [Escherichia coli O157:H7 str. EDL933]
DTU_2024_1035959_100_SI_LVK_80_SE.fq.gz_flye.fasta	DTU_2024_1035959_100_SI_LVK_80_SE.fq.gz_flye_contig_21	56771	61019	+	fdeC	1-4246/4251	========/======	2025-03-01	99.88	94.21	vfdb	YP_002390132	(fdeC) adhesin FdeC [FdeC (VF0506)] [Escherichia coli O45:K1:H7 str. S88]
DTU_2024_1035959_100_SI_LVK_80_SE.fq.gz_flye.fasta	DTU_2024_1035959_100_SI_LVK_80_SE.fq.gz_flye_contig_22	200293	202162	-	espL1	1-1899/1899	========/======	2029-01-01	98.47	95.16	vfdb	NP_288154	(espL1) Type III secretion system effector espL1 [LEE encoded T3SS (SS020)] [Escherichia coli O157:H7 str. EDL933]
DTU_2024_1035959_100_SI_LVK_80_SE.fq.gz_flye.fasta	DTU_2024_1035959_100_SI_LVK_80_SE.fq.gz_flye_contig_23	88434	89486	+	ompA	1-1041/1041	========/======	2025-12-01	100	94.49	vfdb	AAF37887	(ompA) outer membrane protein A [OmpA (VF0236)] [Escherichia coli O18:K1:H7 str. RS218]
DTU_2024_1035959_100_SI_LVK_80_SE.fq.gz_flye.fasta	DTU_2024_1035959_100_SI_LVK_80_SE.fq.gz_flye_contig_25	44461	44577	-	astA	1-117/117	===============	0/0	100	99.14	vfdb	BAA94855	(astA) heat-stable enterotoxin 1 [EAST1 (VF0216)] [Escherichia coli O44:H18 042]
DTU_2024_1035959_100_SI_LVK_80_SE.fq.gz_flye.fasta	DTU_2024_1035959_100_SI_LVK_80_SE.fq.gz_flye_contig_25	54155	54931	+	eltA	1-777/777	===============	0/0	100	99.23	vfdb	AAA24685	(eltA) heat-labile enterotoxin A prepeptide (from human) [Heat-labile toxin (LT) (VF0210)] [Escherichia coli]
DTU_2024_1035959_100_SI_LVK_80_SE.fq.gz_flye.fasta	DTU_2024_1035959_100_SI_LVK_80_SE.fq.gz_flye_contig_25	54928	55302	+	eltB	1-375/375	===============	0/0	100	98.4	vfdb	AAA98064	(eltB) enterotoxin subunit B (from human) [Heat-labile toxin (LT) (VF0210)] [Escherichia coli]
DTU_2024_1035959_100_SI_LVK_80_SE.fq.gz_flye.fasta	DTU_2024_1035959_100_SI_LVK_80_SE.fq.gz_flye_contig_32	15846	17282	-	hlyD	1-1437/1437	===============	0/0	100	96.8	vfdb	NP_755449	(hlyD) Hemolysin D [Hemolysin (VF0225)] [Escherichia coli CFT073]
DTU_2024_1035959_100_SI_LVK_80_SE.fq.gz_flye.fasta	DTU_2024_1035959_100_SI_LVK_80_SE.fq.gz_flye_contig_32	17301	19424	-	hlyB	1-2124/2124	===============	0/0	100	98.12	vfdb	NP_755448	(hlyB) Hemolysin B [Hemolysin (VF0225)] [Escherichia coli CFT073]
DTU_2024_1035959_100_SI_LVK_80_SE.fq.gz_flye.fasta	DTU_2024_1035959_100_SI_LVK_80_SE.fq.gz_flye_contig_32	19496	22570	-	hlyA	1-3075/3075	===============	0/0	100	96.98	vfdb	NP_755445	(hlyA) Hemolysin A [Hemolysin (VF0225)] [Escherichia coli CFT073]
DTU_2024_1035959_100_SI_LVK_80_SE.fq.gz_flye.fasta	DTU_2024_1035959_100_SI_LVK_80_SE.fq.gz_flye_contig_5	296502	297272	-	entD	1-771/771	===============	0/0	100	95.07	vfdb	NP_752599	(entD) phosphopantetheinyl transferase component of enterobactin synthase multienzyme complex [Enterobactin (VF0228)] [Escherichia coli CFT073]
DTU_2024_1035959_100_SI_LVK_80_SE.fq.gz_flye.fasta	DTU_2024_1035959_100_SI_LVK_80_SE.fq.gz_flye_contig_5	297297	299537	-	fepA	1-2241/2241	===============	0/0	100	97.41	vfdb	NP_752600	(fepA) ferrienterobactin outer membrane transporter [Enterobactin (VF0228)] [Escherichia coli CFT073]
DTU_2024_1035959_100_SI_LVK_80_SE.fq.gz_flye.fasta	DTU_2024_1035959_100_SI_LVK_80_SE.fq.gz_flye_contig_5	299780	300982	+	fes	1-1203/1203	===============	0/0	100	96.43	vfdb	NP_752602	(fes) enterobactin/ferric enterobactin esterase [enterobactin (IA019)] [Escherichia coli CFT073]
DTU_2024_1035959_100_SI_LVK_80_SE.fq.gz_flye.fasta	DTU_2024_1035959_100_SI_LVK_80_SE.fq.gz_flye_contig_5	301200	305029	+	entF	1-3830/3882	===============	0/0	98.66	95.48	vfdb	NP_752604	(entF) enterobactin synthase multienzyme complex component ATP-dependent [Enterobactin (VF0228)] [Escherichia coli CFT073]
DTU_2024_1035959_100_SI_LVK_80_SE.fq.gz_flye.fasta	DTU_2024_1035959_100_SI_LVK_80_SE.fq.gz_flye_contig_5	306427	307242	-	fepC	1-816/816	===============	0/0	100	97.3	vfdb	NP_752606	(fepC) ferrienterobactin ABC transporter ATPase [Enterobactin (VF0228)] [Escherichia coli CFT073]
DTU_2024_1035959_100_SI_LVK_80_SE.fq.gz_flye.fasta	DTU_2024_1035959_100_SI_LVK_80_SE.fq.gz_flye_contig_5	307239	308231	-	fepG	1-993/993	===============	0/0	100	94.46	vfdb	NP_752607	(fepG) iron-enterobactin ABC transporter permease [Enterobactin (VF0228)] [Escherichia coli CFT073]
DTU_2024_1035959_100_SI_LVK_80_SE.fq.gz_flye.fasta	DTU_2024_1035959_100_SI_LVK_80_SE.fq.gz_flye_contig_5	308228	309244	-	fepD	1-1017/1017	===============	0/0	100	96.36	vfdb	NP_752608	(fepD) ferrienterobactin ABC transporter permease [Enterobactin (VF0228)] [Escherichia coli CFT073]
DTU_2024_1035959_100_SI_LVK_80_SE.fq.gz_flye.fasta	DTU_2024_1035959_100_SI_LVK_80_SE.fq.gz_flye_contig_5	309343	310593	+	entS	1-1251/1251	===============	0/0	100	95.52	vfdb	NP_752609	(entS) enterobactin exporter iron-regulated [enterobactin (IA019)] [Escherichia coli CFT073]
DTU_2024_1035959_100_SI_LVK_80_SE.fq.gz_flye.fasta	DTU_2024_1035959_100_SI_LVK_80_SE.fq.gz_flye_contig_5	310597	311553	-	fepB	1-957/957	===============	0/0	100	97.39	vfdb	NP_752610	(fepB) ferrienterobactin ABC transporter periplasmic binding protein [Enterobactin (VF0228)] [Escherichia coli CFT073]
DTU_2024_1035959_100_SI_LVK_80_SE.fq.gz_flye.fasta	DTU_2024_1035959_100_SI_LVK_80_SE.fq.gz_flye_contig_5	311916	313103	+	entC	1-1188/1188	===============	0/0	100	97.39	vfdb	NP_752611	(entC) isochorismate synthase 1 [Enterobactin (VF0228)] [Escherichia coli CFT073]
DTU_2024_1035959_100_SI_LVK_80_SE.fq.gz_flye.fasta	DTU_2024_1035959_100_SI_LVK_80_SE.fq.gz_flye_contig_5	313113	314723	+	entE	1-1611/1611	===============	0/0	100	95.78	vfdb	NP_752612	(entE) 23-dihydroxybenzoate-AMP ligase component of enterobactin synthase multienzyme complex [Enterobactin (VF0228)] [Escherichia coli CFT073]
DTU_2024_1035959_100_SI_LVK_80_SE.fq.gz_flye.fasta	DTU_2024_1035959_100_SI_LVK_80_SE.fq.gz_flye_contig_5	314737	315594	+	entB	1-858/858	===============	0/0	100	97.9	vfdb	NP_752613	(entB) isochorismatase [Enterobactin (VF0228)] [Escherichia coli CFT073]
DTU_2024_1035959_100_SI_LVK_80_SE.fq.gz_flye.fasta	DTU_2024_1035959_100_SI_LVK_80_SE.fq.gz_flye_contig_5	315594	316340	+	entA	1-747/747	===============	0/0	100	95.98	vfdb	NP_752614	(entA) 23-dihydro-23-dihydroxybenzoate dehydrogenase [Enterobactin (VF0228)] [Escherichia coli CFT073]
DTU_2024_1035960_100_SI_LVK_83_SE.fq.gz_flye.fasta	DTU_2024_1035960_100_SI_LVK_83_SE.fq.gz_flye_contig_1	329691	330731	+	ompA	1-1041/1041	===============	0/0	100	97.98	vfdb	AAF37887	(ompA) outer membrane protein A [OmpA (VF0236)] [Escherichia coli O18:K1:H7 str. RS218]
DTU_2024_1035960_100_SI_LVK_83_SE.fq.gz_flye.fasta	DTU_2024_1035960_100_SI_LVK_83_SE.fq.gz_flye_contig_1	714999	715745	-	entA	1-747/747	===============	0/0	100	95.58	vfdb	NP_752614	(entA) 23-dihydro-23-dihydroxybenzoate dehydrogenase [Enterobactin (VF0228)] [Escherichia coli CFT073]
DTU_2024_1035960_100_SI_LVK_83_SE.fq.gz_flye.fasta	DTU_2024_1035960_100_SI_LVK_83_SE.fq.gz_flye_contig_1	715745	716602	-	entB	1-858/858	===============	0/0	100	98.14	vfdb	NP_752613	(entB) isochorismatase [Enterobactin (VF0228)] [Escherichia coli CFT073]
DTU_2024_1035960_100_SI_LVK_83_SE.fq.gz_flye.fasta	DTU_2024_1035960_100_SI_LVK_83_SE.fq.gz_flye_contig_1	716616	718226	-	entE	1-1611/1611	===============	0/0	100	95.34	vfdb	NP_752612	(entE) 23-dihydroxybenzoate-AMP ligase component of enterobactin synthase multienzyme complex [Enterobactin (VF0228)] [Escherichia coli CFT073]
DTU_2024_1035960_100_SI_LVK_83_SE.fq.gz_flye.fasta	DTU_2024_1035960_100_SI_LVK_83_SE.fq.gz_flye_contig_1	718236	719423	-	entC	1-1188/1188	===============	0/0	100	97.81	vfdb	NP_752611	(entC) isochorismate synthase 1 [Enterobactin (VF0228)] [Escherichia coli CFT073]
DTU_2024_1035960_100_SI_LVK_83_SE.fq.gz_flye.fasta	DTU_2024_1035960_100_SI_LVK_83_SE.fq.gz_flye_contig_1	719786	720742	+	fepB	1-957/957	===============	0/0	100	97.49	vfdb	NP_752610	(fepB) ferrienterobactin ABC transporter periplasmic binding protein [Enterobactin (VF0228)] [Escherichia coli CFT073]
DTU_2024_1035960_100_SI_LVK_83_SE.fq.gz_flye.fasta	DTU_2024_1035960_100_SI_LVK_83_SE.fq.gz_flye_contig_1	720746	721996	-	entS	1-1251/1251	===============	0/0	100	95.44	vfdb	NP_752609	(entS) enterobactin exporter iron-regulated [enterobactin (IA019)] [Escherichia coli CFT073]
DTU_2024_1035960_100_SI_LVK_83_SE.fq.gz_flye.fasta	DTU_2024_1035960_100_SI_LVK_83_SE.fq.gz_flye_contig_1	722095	723111	+	fepD	1-1017/1017	===============	0/0	100	96.07	vfdb	NP_752608	(fepD) ferrienterobactin ABC transporter permease [Enterobactin (VF0228)] [Escherichia coli CFT073]
DTU_2024_1035960_100_SI_LVK_83_SE.fq.gz_flye.fasta	DTU_2024_1035960_100_SI_LVK_83_SE.fq.gz_flye_contig_1	723108	724100	+	fepG	1-993/993	===============	0/0	100	94.06	vfdb	NP_752607	(fepG) iron-enterobactin ABC transporter permease [Enterobactin (VF0228)] [Escherichia coli CFT073]
DTU_2024_1035960_100_SI_LVK_83_SE.fq.gz_flye.fasta	DTU_2024_1035960_100_SI_LVK_83_SE.fq.gz_flye_contig_1	724097	724912	+	fepC	1-816/816	===============	0/0	100	97.3	vfdb	NP_752606	(fepC) ferrienterobactin ABC transporter ATPase [Enterobactin (VF0228)] [Escherichia coli CFT073]
DTU_2024_1035960_100_SI_LVK_83_SE.fq.gz_flye.fasta	DTU_2024_1035960_100_SI_LVK_83_SE.fq.gz_flye_contig_1	726286	730139	-	entF	1-3854/3882	===============	0/0	99.28	95.69	vfdb	NP_752604	(entF) enterobactin synthase multienzyme complex component ATP-dependent [Enterobactin (VF0228)] [Escherichia coli CFT073]
DTU_2024_1035960_100_SI_LVK_83_SE.fq.gz_flye.fasta	DTU_2024_1035960_100_SI_LVK_83_SE.fq.gz_flye_contig_1	730357	731559	-	fes	1-1203/1203	===============	0/0	100	96.67	vfdb	NP_752602	(fes) enterobactin/ferric enterobactin esterase [enterobactin (IA019)] [Escherichia coli CFT073]
DTU_2024_1035960_100_SI_LVK_83_SE.fq.gz_flye.fasta	DTU_2024_1035960_100_SI_LVK_83_SE.fq.gz_flye_contig_1	731802	734042	+	fepA	1-2241/2241	===============	0/0	100	96.74	vfdb	NP_752600	(fepA) ferrienterobactin outer membrane transporter [Enterobactin (VF0228)] [Escherichia coli CFT073]
DTU_2024_1035960_100_SI_LVK_83_SE.fq.gz_flye.fasta	DTU_2024_1035960_100_SI_LVK_83_SE.fq.gz_flye_contig_1	734067	734837	+	entD	1-771/771	===============	0/0	100	95.2	vfdb	NP_752599	(entD) phosphopantetheinyl transferase component of enterobactin synthase multienzyme complex [Enterobactin (VF0228)] [Escherichia coli CFT073]
DTU_2024_1035960_100_SI_LVK_83_SE.fq.gz_flye.fasta	DTU_2024_1035960_100_SI_LVK_83_SE.fq.gz_flye_contig_1	776101	776854	-	yagV/ecpE	1-754/756	===============	0/0	99.74	96.95	vfdb	NP_286006	(yagV/ecpE) E. coli common pilus chaperone EcpE [ECP (VF0404)] [Escherichia coli O157:H7 str. EDL933]
DTU_2024_1035960_100_SI_LVK_83_SE.fq.gz_flye.fasta	DTU_2024_1035960_100_SI_LVK_83_SE.fq.gz_flye_contig_1	776778	778421	-	yagW/ecpD	1-1644/1644	===============	0/0	100	98.97	vfdb	NP_286007	(yagW/ecpD) polymerized tip adhesin of ECP fibers [ECP (VF0404)] [Escherichia coli O157:H7 str. EDL933]
DTU_2024_1035960_100_SI_LVK_83_SE.fq.gz_flye.fasta	DTU_2024_1035960_100_SI_LVK_83_SE.fq.gz_flye_contig_1	778411	780936	-	yagX/ecpC	1-2526/2526	===============	0/0	100	98.69	vfdb	NP_286008	(yagX/ecpC) E. coli common pilus usher EcpC [ECP (VF0404)] [Escherichia coli O157:H7 str. EDL933]
DTU_2024_1035960_100_SI_LVK_83_SE.fq.gz_flye.fasta	DTU_2024_1035960_100_SI_LVK_83_SE.fq.gz_flye_contig_1	780962	781630	-	yagY/ecpB	1-669/669	===============	0/0	100	98.06	vfdb	NP_286009	(yagY/ecpB) E. coli common pilus chaperone EcpB [ECP (VF0404)] [Escherichia coli O157:H7 str. EDL933]
DTU_2024_1035960_100_SI_LVK_83_SE.fq.gz_flye.fasta	DTU_2024_1035960_100_SI_LVK_83_SE.fq.gz_flye_contig_1	781688	782275	-	yagZ/ecpA	1-588/588	===============	0/0	100	99.15	vfdb	NP_286010	(yagZ/ecpA) E. coli common pilus structural subunit EcpA [ECP (VF0404)] [Escherichia coli O157:H7 str. EDL933]
DTU_2024_1035960_100_SI_LVK_83_SE.fq.gz_flye.fasta	DTU_2024_1035960_100_SI_LVK_83_SE.fq.gz_flye_contig_1	782350	782940	-	ykgK/ecpR	1-591/591	===============	0/0	100	96.95	vfdb	NP_286011	(ykgK/ecpR) regulator protein EcpR [ECP (VF0404)] [Escherichia coli O157:H7 str. EDL933]
DTU_2024_1035960_100_SI_LVK_83_SE.fq.gz_flye.fasta	DTU_2024_1035960_100_SI_LVK_83_SE.fq.gz_flye_contig_1	785961	790209	+	fdeC	1-4246/4251	========/======	2025-03-01	99.88	94.26	vfdb	YP_002390132	(fdeC) adhesin FdeC [FdeC (VF0506)] [Escherichia coli O45:K1:H7 str. S88]
DTU_2024_1035960_100_SI_LVK_83_SE.fq.gz_flye.fasta	DTU_2024_1035960_100_SI_LVK_83_SE.fq.gz_flye_contig_1	1348292	1349713	+	espX1	1-1422/1422	===============	0/0	100	95.22	vfdb	NP_285716	(espX1) Type III secretion system effector EspX1 [LEE encoded T3SS (SS020)] [Escherichia coli O157:H7 str. EDL933]
DTU_2024_1035960_100_SI_LVK_83_SE.fq.gz_flye.fasta	DTU_2024_1035960_100_SI_LVK_83_SE.fq.gz_flye_contig_1	1446759	1447670	-	fimH	1-912/912	===============	0/0	100	97.48	vfdb	NP_757248	(fimH) FimH protein precursor [Type 1 fimbriae (VF0221)] [Escherichia coli CFT073]
DTU_2024_1035960_100_SI_LVK_83_SE.fq.gz_flye.fasta	DTU_2024_1035960_100_SI_LVK_83_SE.fq.gz_flye_contig_1	1447681	1448184	-	fimG	1-504/504	===============	0/0	100	97.42	vfdb	NP_757247	(fimG) FimG protein precursor [Type 1 fimbriae (VF0221)] [Escherichia coli CFT073]
DTU_2024_1035960_100_SI_LVK_83_SE.fq.gz_flye.fasta	DTU_2024_1035960_100_SI_LVK_83_SE.fq.gz_flye_contig_1	1448197	1448730	-	fimF	1-534/534	===============	0/0	100	97.57	vfdb	NP_757245	(fimF) FimF protein precursor [Type 1 fimbriae (VF0221)] [Escherichia coli CFT073]
DTU_2024_1035960_100_SI_LVK_83_SE.fq.gz_flye.fasta	DTU_2024_1035960_100_SI_LVK_83_SE.fq.gz_flye_contig_1	1448737	1451372	-	fimD	1-2637/2637	========/======	2025-01-01	99.96	98.37	vfdb	NP_757244	(fimD) Outer membrane usher protein fimD precursor [Type 1 fimbriae (VF0221)] [Escherichia coli CFT073]
DTU_2024_1035960_100_SI_LVK_83_SE.fq.gz_flye.fasta	DTU_2024_1035960_100_SI_LVK_83_SE.fq.gz_flye_contig_1	1451439	1452164	-	fimC	1-726/726	===============	0/0	100	98.76	vfdb	NP_757243	(fimC) Chaperone protein fimC precursor [Type 1 fimbriae (VF0221)] [Escherichia coli CFT073]
DTU_2024_1035960_100_SI_LVK_83_SE.fq.gz_flye.fasta	DTU_2024_1035960_100_SI_LVK_83_SE.fq.gz_flye_contig_1	1452201	1452740	-	fimI	1-540/540	===============	0/0	100	98.33	vfdb	NP_757242	(fimI) Fimbrin-like protein fimI precursor [Type 1 fimbriae (VF0221)] [Escherichia coli CFT073]
DTU_2024_1035960_100_SI_LVK_83_SE.fq.gz_flye.fasta	DTU_2024_1035960_100_SI_LVK_83_SE.fq.gz_flye_contig_1	1453843	1454437	-	fimE	1-595/597	===============	0/0	99.66	99.33	vfdb	NP_757240	(fimE) Type 1 fimbriae Regulatory protein fimE [Type 1 fimbriae (VF0221)] [Escherichia coli CFT073]
DTU_2024_1035960_100_SI_LVK_83_SE.fq.gz_flye.fasta	DTU_2024_1035960_100_SI_LVK_83_SE.fq.gz_flye_contig_1	1454914	1455516	-	fimB	1-603/603	===============	0/0	100	98.01	vfdb	NP_757239	(fimB) Type 1 fimbriae Regulatory protein fimB [Type 1 fimbriae (VF0221)] [Escherichia coli CFT073]
DTU_2024_1035960_100_SI_LVK_83_SE.fq.gz_flye.fasta	DTU_2024_1035960_100_SI_LVK_83_SE.fq.gz_flye_contig_1	1696082	1697374	+	espX5	1-1293/1293	===============	0/0	100	97.14	vfdb	NP_290699	(espX5) Type III secretion system effector EspX5 [LEE encoded T3SS (SS020)] [Escherichia coli O157:H7 str. EDL933]
DTU_2024_1035960_100_SI_LVK_83_SE.fq.gz_flye.fasta	DTU_2024_1035960_100_SI_LVK_83_SE.fq.gz_flye_contig_1	1726879	1728459	-	espX4	1-1581/1581	===============	0/0	100	96.39	vfdb	NP_290672	(espX4) Type III secretion system effector EspX4 [LEE encoded T3SS (SS020)] [Escherichia coli O157:H7 str. EDL933]
DTU_2024_1035960_100_SI_LVK_83_SE.fq.gz_flye.fasta	DTU_2024_1035960_100_SI_LVK_83_SE.fq.gz_flye_contig_1	1756675	1758861	+	espL4	1-2187/2187	===============	0/0	100	97.39	vfdb	NP_290644	(espL4) Type III secretion system effector EspL4 [LEE encoded T3SS (SS020)] [Escherichia coli O157:H7 str. EDL933]
DTU_2024_1035960_100_SI_LVK_83_SE.fq.gz_flye.fasta	DTU_2024_1035960_100_SI_LVK_83_SE.fq.gz_flye_contig_1	1993832	1995260	+	aslA	1-1428/1428	========/======	2025-01-01	100	92.86	vfdb	AAG10151	(aslA) putative arylsulfatase [AslA (VF0238)] [Escherichia coli O18:K1:H7 str. RS218]
DTU_2024_1035960_100_SI_LVK_83_SE.fq.gz_flye.fasta	DTU_2024_1035960_100_SI_LVK_83_SE.fq.gz_flye_contig_11	54644	56980	+	faeD	103-2439/2439	===============	0/0	95.82	91.48	vfdb	YP_002295985	(faeD) fimbrial usher protein FaeD [K88 pili/F4 fimbriae (AI040)] [Escherichia coli SE11]
DTU_2024_1035960_100_SI_LVK_83_SE.fq.gz_flye.fasta	DTU_2024_1035960_100_SI_LVK_83_SE.fq.gz_flye_contig_11	56973	57700	+	faeE	1-728/777	===============	0/0	93.69	92.44	vfdb	YP_002295986	(faeE) fimbrial chaperone FaeE [K88 pili/F4 fimbriae (AI040)] [Escherichia coli SE11]
DTU_2024_1035960_100_SI_LVK_83_SE.fq.gz_flye.fasta	DTU_2024_1035960_100_SI_LVK_83_SE.fq.gz_flye_contig_2	36371	38270	+	espL1	1-1899/1899	========/======	2025-01-01	100	97.53	vfdb	NP_288154	(espL1) Type III secretion system effector espL1 [LEE encoded T3SS (SS020)] [Escherichia coli O157:H7 str. EDL933]
DTU_2024_1035960_100_SI_LVK_83_SE.fq.gz_flye.fasta	DTU_2024_1035960_100_SI_LVK_83_SE.fq.gz_flye_contig_2	1377860	1378281	-	gspM	1-422/423	===============	0/0	99.76	93.6	vfdb	YP_404609	(gspM) general secretion pathway protein M [T2SS (VF0333)] [Shigella dysenteriae Sd197]
DTU_2024_1035960_100_SI_LVK_83_SE.fq.gz_flye.fasta	DTU_2024_1035960_100_SI_LVK_83_SE.fq.gz_flye_contig_2	1378397	1379257	-	gspL	1-861/861	===============	0/0	100	94.89	vfdb	YP_404608	(gspL) general secretion pathway protein L [T2SS (VF0333)] [Shigella dysenteriae Sd197]
DTU_2024_1035960_100_SI_LVK_83_SE.fq.gz_flye.fasta	DTU_2024_1035960_100_SI_LVK_83_SE.fq.gz_flye_contig_2	1379572	1380549	-	gspK	1-978/978	===============	0/0	100	96.73	vfdb	YP_404607	(gspK) general secretion pathway protein K [T2SS (VF0333)] [Shigella dysenteriae Sd197]
DTU_2024_1035960_100_SI_LVK_83_SE.fq.gz_flye.fasta	DTU_2024_1035960_100_SI_LVK_83_SE.fq.gz_flye_contig_2	1380546	1381115	-	gspJ	1-570/570	===============	0/0	100	94.91	vfdb	YP_404606	(gspJ) general secretion pathway protein J [T2SS (VF0333)] [Shigella dysenteriae Sd197]
DTU_2024_1035960_100_SI_LVK_83_SE.fq.gz_flye.fasta	DTU_2024_1035960_100_SI_LVK_83_SE.fq.gz_flye_contig_2	1381148	1381519	-	gspI	1-372/372	===============	0/0	100	93.01	vfdb	YP_404605	(gspI) general secretion pathway protein I [T2SS (VF0333)] [Shigella dysenteriae Sd197]
DTU_2024_1035960_100_SI_LVK_83_SE.fq.gz_flye.fasta	DTU_2024_1035960_100_SI_LVK_83_SE.fq.gz_flye_contig_2	1381516	1382046	-	gspH	1-531/531	===============	0/0	100	94.16	vfdb	YP_404604	(gspH) general secretion pathway protein H [T2SS (VF0333)] [Shigella dysenteriae Sd197]
DTU_2024_1035960_100_SI_LVK_83_SE.fq.gz_flye.fasta	DTU_2024_1035960_100_SI_LVK_83_SE.fq.gz_flye_contig_2	1382083	1382538	-	gspG	1-456/456	===============	0/0	100	94.74	vfdb	YP_404603	(gspG) general secretion pathway protein G [T2SS (VF0333)] [Shigella dysenteriae Sd197]
DTU_2024_1035960_100_SI_LVK_83_SE.fq.gz_flye.fasta	DTU_2024_1035960_100_SI_LVK_83_SE.fq.gz_flye_contig_2	1382579	1383778	-	gspF	1-1200/1200	===============	0/0	100	95.5	vfdb	YP_404602	(gspF) general secretion pathway protein F [T2SS (VF0333)] [Shigella dysenteriae Sd197]
DTU_2024_1035960_100_SI_LVK_83_SE.fq.gz_flye.fasta	DTU_2024_1035960_100_SI_LVK_83_SE.fq.gz_flye_contig_2	1383778	1385271	-	gspE	1-1494/1494	===============	0/0	100	96.05	vfdb	YP_404601	(gspE) general secretion pathway protein E [T2SS (VF0333)] [Shigella dysenteriae Sd197]
DTU_2024_1035960_100_SI_LVK_83_SE.fq.gz_flye.fasta	DTU_2024_1035960_100_SI_LVK_83_SE.fq.gz_flye_contig_2	1385271	1387121	-	gspD	1-1836/1836	========/======	2015-01-01	100	97.14	vfdb	YP_404600	(gspD) general secretion pathway protein D [T2SS (VF0333)] [Shigella dysenteriae Sd197]
DTU_2024_1035960_100_SI_LVK_83_SE.fq.gz_flye.fasta	DTU_2024_1035960_100_SI_LVK_83_SE.fq.gz_flye_contig_2	1387361	1388191	-	gspC	1-831/831	===============	0/0	100	95.31	vfdb	YP_404599	(gspC) general secretion pathway protein C [T2SS (VF0333)] [Shigella dysenteriae Sd197]
DTU_2024_1035960_100_SI_LVK_83_SE.fq.gz_flye.fasta	DTU_2024_1035960_100_SI_LVK_83_SE.fq.gz_flye_contig_5	20161	20277	+	astA	1-117/117	===============	0/0	100	95.73	vfdb	BAA94855	(astA) heat-stable enterotoxin 1 [EAST1 (VF0216)] [Escherichia coli O44:H18 042]
DTU_2024_1035960_100_SI_LVK_83_SE.fq.gz_flye.fasta	DTU_2024_1035960_100_SI_LVK_83_SE.fq.gz_flye_contig_5	701760	702182	-	gspM	1-423/423	===============	0/0	100	94.56	vfdb	YP_404609	(gspM) general secretion pathway protein M [T2SS (VF0333)] [Shigella dysenteriae Sd197]
DTU_2024_1035960_100_SI_LVK_83_SE.fq.gz_flye.fasta	DTU_2024_1035960_100_SI_LVK_83_SE.fq.gz_flye_contig_5	702298	703158	-	gspL	1-861/861	===============	0/0	100	97.79	vfdb	YP_404608	(gspL) general secretion pathway protein L [T2SS (VF0333)] [Shigella dysenteriae Sd197]
DTU_2024_1035960_100_SI_LVK_83_SE.fq.gz_flye.fasta	DTU_2024_1035960_100_SI_LVK_83_SE.fq.gz_flye_contig_5	703473	704450	-	gspK	1-978/978	===============	0/0	100	96.42	vfdb	YP_404607	(gspK) general secretion pathway protein K [T2SS (VF0333)] [Shigella dysenteriae Sd197]
DTU_2024_1035960_100_SI_LVK_83_SE.fq.gz_flye.fasta	DTU_2024_1035960_100_SI_LVK_83_SE.fq.gz_flye_contig_5	704447	705016	-	gspJ	1-570/570	===============	0/0	100	97.19	vfdb	YP_404606	(gspJ) general secretion pathway protein J [T2SS (VF0333)] [Shigella dysenteriae Sd197]
DTU_2024_1035960_100_SI_LVK_83_SE.fq.gz_flye.fasta	DTU_2024_1035960_100_SI_LVK_83_SE.fq.gz_flye_contig_5	705049	705420	-	gspI	1-372/372	===============	0/0	100	94.89	vfdb	YP_404605	(gspI) general secretion pathway protein I [T2SS (VF0333)] [Shigella dysenteriae Sd197]
DTU_2024_1035960_100_SI_LVK_83_SE.fq.gz_flye.fasta	DTU_2024_1035960_100_SI_LVK_83_SE.fq.gz_flye_contig_5	705417	705947	-	gspH	1-531/531	===============	0/0	100	95.1	vfdb	YP_404604	(gspH) general secretion pathway protein H [T2SS (VF0333)] [Shigella dysenteriae Sd197]
DTU_2024_1035960_100_SI_LVK_83_SE.fq.gz_flye.fasta	DTU_2024_1035960_100_SI_LVK_83_SE.fq.gz_flye_contig_5	705984	706439	-	gspG	1-456/456	===============	0/0	100	95.61	vfdb	YP_404603	(gspG) general secretion pathway protein G [T2SS (VF0333)] [Shigella dysenteriae Sd197]
DTU_2024_1035960_100_SI_LVK_83_SE.fq.gz_flye.fasta	DTU_2024_1035960_100_SI_LVK_83_SE.fq.gz_flye_contig_5	706480	707679	-	gspF	1-1200/1200	===============	0/0	100	96.83	vfdb	YP_404602	(gspF) general secretion pathway protein F [T2SS (VF0333)] [Shigella dysenteriae Sd197]
DTU_2024_1035960_100_SI_LVK_83_SE.fq.gz_flye.fasta	DTU_2024_1035960_100_SI_LVK_83_SE.fq.gz_flye_contig_5	707679	709172	-	gspE	1-1494/1494	===============	0/0	100	96.19	vfdb	YP_404601	(gspE) general secretion pathway protein E [T2SS (VF0333)] [Shigella dysenteriae Sd197]
DTU_2024_1035960_100_SI_LVK_83_SE.fq.gz_flye.fasta	DTU_2024_1035960_100_SI_LVK_83_SE.fq.gz_flye_contig_5	709172	711022	-	gspD	1-1836/1836	========/======	2015-01-01	100	97.73	vfdb	YP_404600	(gspD) general secretion pathway protein D [T2SS (VF0333)] [Shigella dysenteriae Sd197]
DTU_2024_1035960_100_SI_LVK_83_SE.fq.gz_flye.fasta	DTU_2024_1035960_100_SI_LVK_83_SE.fq.gz_flye_contig_5	711262	712092	-	gspC	1-831/831	===============	0/0	100	95.31	vfdb	YP_404599	(gspC) general secretion pathway protein C [T2SS (VF0333)] [Shigella dysenteriae Sd197]
DTU_2024_1035960_100_SI_LVK_83_SE.fq.gz_flye.fasta	DTU_2024_1035960_100_SI_LVK_83_SE.fq.gz_flye_contig_5	730956	731072	-	astA	1-117/117	===============	0/0	100	100	vfdb	BAA94855	(astA) heat-stable enterotoxin 1 [EAST1 (VF0216)] [Escherichia coli O44:H18 042]
DTU_2024_1035960_100_SI_LVK_83_SE.fq.gz_flye.fasta	DTU_2024_1035960_100_SI_LVK_83_SE.fq.gz_flye_contig_6	11776	12150	-	eltB	1-375/375	===============	0/0	100	98.4	vfdb	AAA98064	(eltB) enterotoxin subunit B (from human) [Heat-labile toxin (LT) (VF0210)] [Escherichia coli]
DTU_2024_1035960_100_SI_LVK_83_SE.fq.gz_flye.fasta	DTU_2024_1035960_100_SI_LVK_83_SE.fq.gz_flye_contig_6	12147	12923	-	eltA	1-777/777	===============	0/0	100	99.36	vfdb	AAA24685	(eltA) heat-labile enterotoxin A prepeptide (from human) [Heat-labile toxin (LT) (VF0210)] [Escherichia coli]
DTU_2024_1035960_100_SI_LVK_83_SE.fq.gz_flye.fasta	DTU_2024_1035960_100_SI_LVK_83_SE.fq.gz_flye_contig_7	68150	68368	+	estIa	1-219/219	===============	0/0	100	100	vfdb	YP_003294006	(estIa) heat stable enterotoxin I [Heat-stable toxin (ST) (VF0211)] [Escherichia coli O78:H11:K80 str. H10407]
DTU_2024_1035960_100_SI_LVK_83_SE.fq.gz_flye.fasta	DTU_2024_1035960_100_SI_LVK_83_SE.fq.gz_flye_contig_8	12720	15794	+	hlyA	1-3075/3075	===============	0/0	100	96.88	vfdb	NP_755445	(hlyA) Hemolysin A [Hemolysin (VF0225)] [Escherichia coli CFT073]
DTU_2024_1035960_100_SI_LVK_83_SE.fq.gz_flye.fasta	DTU_2024_1035960_100_SI_LVK_83_SE.fq.gz_flye_contig_8	15866	17989	+	hlyB	1-2124/2124	===============	0/0	100	98.12	vfdb	NP_755448	(hlyB) Hemolysin B [Hemolysin (VF0225)] [Escherichia coli CFT073]
DTU_2024_1035960_100_SI_LVK_83_SE.fq.gz_flye.fasta	DTU_2024_1035960_100_SI_LVK_83_SE.fq.gz_flye_contig_8	18008	19444	+	hlyD	1-1437/1437	===============	0/0	100	96.73	vfdb	NP_755449	(hlyD) Hemolysin D [Hemolysin (VF0225)] [Escherichia coli CFT073]
DTU_2024_1035961_100_SI_LVK_94_SE.fq.gz_flye.fasta	DTU_2024_1035961_100_SI_LVK_94_SE.fq.gz_flye_contig_1	48565	49993	-	aslA	1-1428/1428	========/======	2025-01-01	100	92.93	vfdb	AAG10151	(aslA) putative arylsulfatase [AslA (VF0238)] [Escherichia coli O18:K1:H7 str. RS218]
DTU_2024_1035961_100_SI_LVK_94_SE.fq.gz_flye.fasta	DTU_2024_1035961_100_SI_LVK_94_SE.fq.gz_flye_contig_16	6274	7326	+	ompA	1-1041/1041	========/======	2025-12-01	100	94.59	vfdb	AAF37887	(ompA) outer membrane protein A [OmpA (VF0236)] [Escherichia coli O18:K1:H7 str. RS218]
DTU_2024_1035961_100_SI_LVK_94_SE.fq.gz_flye.fasta	DTU_2024_1035961_100_SI_LVK_94_SE.fq.gz_flye_contig_20	186315	188213	+	espL1	1-1899/1899	===============	0/0	100	96.37	vfdb	NP_288154	(espL1) Type III secretion system effector espL1 [LEE encoded T3SS (SS020)] [Escherichia coli O157:H7 str. EDL933]
DTU_2024_1035961_100_SI_LVK_94_SE.fq.gz_flye.fasta	DTU_2024_1035961_100_SI_LVK_94_SE.fq.gz_flye_contig_34	23306	23422	-	astA	1-117/117	===============	0/0	100	100	vfdb	BAA94855	(astA) heat-stable enterotoxin 1 [EAST1 (VF0216)] [Escherichia coli O44:H18 042]
DTU_2024_1035961_100_SI_LVK_94_SE.fq.gz_flye.fasta	DTU_2024_1035961_100_SI_LVK_94_SE.fq.gz_flye_contig_34	25209	26645	-	hlyD	1-1437/1437	===============	0/0	100	96.66	vfdb	NP_755449	(hlyD) Hemolysin D [Hemolysin (VF0225)] [Escherichia coli CFT073]
DTU_2024_1035961_100_SI_LVK_94_SE.fq.gz_flye.fasta	DTU_2024_1035961_100_SI_LVK_94_SE.fq.gz_flye_contig_34	26664	28787	-	hlyB	1-2124/2124	===============	0/0	100	98.07	vfdb	NP_755448	(hlyB) Hemolysin B [Hemolysin (VF0225)] [Escherichia coli CFT073]
DTU_2024_1035961_100_SI_LVK_94_SE.fq.gz_flye.fasta	DTU_2024_1035961_100_SI_LVK_94_SE.fq.gz_flye_contig_34	28859	31933	-	hlyA	1-3075/3075	===============	0/0	100	97.11	vfdb	NP_755445	(hlyA) Hemolysin A [Hemolysin (VF0225)] [Escherichia coli CFT073]
DTU_2024_1035961_100_SI_LVK_94_SE.fq.gz_flye.fasta	DTU_2024_1035961_100_SI_LVK_94_SE.fq.gz_flye_contig_37	24005	24550	+	faeC	1-546/546	===============	0/0	100	99.82	vfdb	AAL47165	(faeC) FaeC [K88 pili/F4 fimbriae (AI040)] [Escherichia coli]
DTU_2024_1035961_100_SI_LVK_94_SE.fq.gz_flye.fasta	DTU_2024_1035961_100_SI_LVK_94_SE.fq.gz_flye_contig_37	24562	27000	+	faeD	1-2439/2439	===============	0/0	100	99.47	vfdb	YP_002295985	(faeD) fimbrial usher protein FaeD [K88 pili/F4 fimbriae (AI040)] [Escherichia coli SE11]
DTU_2024_1035961_100_SI_LVK_94_SE.fq.gz_flye.fasta	DTU_2024_1035961_100_SI_LVK_94_SE.fq.gz_flye_contig_37	26993	27769	+	faeE	1-777/777	===============	0/0	100	98.2	vfdb	YP_002295986	(faeE) fimbrial chaperone FaeE [K88 pili/F4 fimbriae (AI040)] [Escherichia coli SE11]
DTU_2024_1035961_100_SI_LVK_94_SE.fq.gz_flye.fasta	DTU_2024_1035961_100_SI_LVK_94_SE.fq.gz_flye_contig_37	27804	28295	+	faeF	1-492/492	===============	0/0	100	98.58	vfdb	YP_002295987	(faeF) fimbrial protein FaeF [K88 pili/F4 fimbriae (AI040)] [Escherichia coli SE11]
DTU_2024_1035961_100_SI_LVK_94_SE.fq.gz_flye.fasta	DTU_2024_1035961_100_SI_LVK_94_SE.fq.gz_flye_contig_37	29554	30351	+	faeH	1-798/798	===============	0/0	100	99.62	vfdb	YP_002295989	(faeH) fimbrial protein FaeH [K88 pili/F4 fimbriae (AI040)] [Escherichia coli SE11]
DTU_2024_1035961_100_SI_LVK_94_SE.fq.gz_flye.fasta	DTU_2024_1035961_100_SI_LVK_94_SE.fq.gz_flye_contig_37	30381	31145	+	faeI	1-765/765	===============	0/0	100	99.74	vfdb	YP_002295990	(faeI) fimbrial protein FaeI [K88 pili/F4 fimbriae (AI040)] [Escherichia coli SE11]
DTU_2024_1035961_100_SI_LVK_94_SE.fq.gz_flye.fasta	DTU_2024_1035961_100_SI_LVK_94_SE.fq.gz_flye_contig_37	31162	31935	+	faeJ	1-774/774	===============	0/0	100	99.87	vfdb	YP_002295991	(faeJ) fimbrial protein FaeJ [K88 pili/F4 fimbriae (AI040)] [Escherichia coli SE11]
DTU_2024_1035961_100_SI_LVK_94_SE.fq.gz_flye.fasta	DTU_2024_1035961_100_SI_LVK_94_SE.fq.gz_flye_contig_4	786108	786938	+	gspC	1-831/831	===============	0/0	100	95.31	vfdb	YP_404599	(gspC) general secretion pathway protein C [T2SS (VF0333)] [Shigella dysenteriae Sd197]
DTU_2024_1035961_100_SI_LVK_94_SE.fq.gz_flye.fasta	DTU_2024_1035961_100_SI_LVK_94_SE.fq.gz_flye_contig_4	787178	789028	+	gspD	1-1836/1836	========/======	2015-01-01	100	97.73	vfdb	YP_404600	(gspD) general secretion pathway protein D [T2SS (VF0333)] [Shigella dysenteriae Sd197]
DTU_2024_1035961_100_SI_LVK_94_SE.fq.gz_flye.fasta	DTU_2024_1035961_100_SI_LVK_94_SE.fq.gz_flye_contig_4	789028	790521	+	gspE	1-1494/1494	===============	0/0	100	96.19	vfdb	YP_404601	(gspE) general secretion pathway protein E [T2SS (VF0333)] [Shigella dysenteriae Sd197]
DTU_2024_1035961_100_SI_LVK_94_SE.fq.gz_flye.fasta	DTU_2024_1035961_100_SI_LVK_94_SE.fq.gz_flye_contig_4	790521	791720	+	gspF	1-1200/1200	===============	0/0	100	96.75	vfdb	YP_404602	(gspF) general secretion pathway protein F [T2SS (VF0333)] [Shigella dysenteriae Sd197]
DTU_2024_1035961_100_SI_LVK_94_SE.fq.gz_flye.fasta	DTU_2024_1035961_100_SI_LVK_94_SE.fq.gz_flye_contig_4	791761	792216	+	gspG	1-456/456	===============	0/0	100	95.61	vfdb	YP_404603	(gspG) general secretion pathway protein G [T2SS (VF0333)] [Shigella dysenteriae Sd197]
DTU_2024_1035961_100_SI_LVK_94_SE.fq.gz_flye.fasta	DTU_2024_1035961_100_SI_LVK_94_SE.fq.gz_flye_contig_4	792253	792783	+	gspH	1-531/531	===============	0/0	100	95.1	vfdb	YP_404604	(gspH) general secretion pathway protein H [T2SS (VF0333)] [Shigella dysenteriae Sd197]
DTU_2024_1035961_100_SI_LVK_94_SE.fq.gz_flye.fasta	DTU_2024_1035961_100_SI_LVK_94_SE.fq.gz_flye_contig_4	792780	793151	+	gspI	1-372/372	===============	0/0	100	94.89	vfdb	YP_404605	(gspI) general secretion pathway protein I [T2SS (VF0333)] [Shigella dysenteriae Sd197]
DTU_2024_1035961_100_SI_LVK_94_SE.fq.gz_flye.fasta	DTU_2024_1035961_100_SI_LVK_94_SE.fq.gz_flye_contig_4	793184	793753	+	gspJ	1-570/570	===============	0/0	100	97.02	vfdb	YP_404606	(gspJ) general secretion pathway protein J [T2SS (VF0333)] [Shigella dysenteriae Sd197]
DTU_2024_1035961_100_SI_LVK_94_SE.fq.gz_flye.fasta	DTU_2024_1035961_100_SI_LVK_94_SE.fq.gz_flye_contig_4	793750	794727	+	gspK	1-978/978	===============	0/0	100	96.42	vfdb	YP_404607	(gspK) general secretion pathway protein K [T2SS (VF0333)] [Shigella dysenteriae Sd197]
DTU_2024_1035961_100_SI_LVK_94_SE.fq.gz_flye.fasta	DTU_2024_1035961_100_SI_LVK_94_SE.fq.gz_flye_contig_4	795042	795902	+	gspL	1-861/861	===============	0/0	100	97.79	vfdb	YP_404608	(gspL) general secretion pathway protein L [T2SS (VF0333)] [Shigella dysenteriae Sd197]
DTU_2024_1035961_100_SI_LVK_94_SE.fq.gz_flye.fasta	DTU_2024_1035961_100_SI_LVK_94_SE.fq.gz_flye_contig_4	796018	796440	+	gspM	1-423/423	===============	0/0	100	94.56	vfdb	YP_404609	(gspM) general secretion pathway protein M [T2SS (VF0333)] [Shigella dysenteriae Sd197]
DTU_2024_1035961_100_SI_LVK_94_SE.fq.gz_flye.fasta	DTU_2024_1035961_100_SI_LVK_94_SE.fq.gz_flye_contig_5	30629	31382	-	yagV/ecpE	1-754/756	===============	0/0	99.74	96.95	vfdb	NP_286006	(yagV/ecpE) E. coli common pilus chaperone EcpE [ECP (VF0404)] [Escherichia coli O157:H7 str. EDL933]
DTU_2024_1035961_100_SI_LVK_94_SE.fq.gz_flye.fasta	DTU_2024_1035961_100_SI_LVK_94_SE.fq.gz_flye_contig_5	31306	32949	-	yagW/ecpD	1-1644/1644	===============	0/0	100	99.27	vfdb	NP_286007	(yagW/ecpD) polymerized tip adhesin of ECP fibers [ECP (VF0404)] [Escherichia coli O157:H7 str. EDL933]
DTU_2024_1035961_100_SI_LVK_94_SE.fq.gz_flye.fasta	DTU_2024_1035961_100_SI_LVK_94_SE.fq.gz_flye_contig_5	32939	35464	-	yagX/ecpC	1-2526/2526	===============	0/0	100	98.77	vfdb	NP_286008	(yagX/ecpC) E. coli common pilus usher EcpC [ECP (VF0404)] [Escherichia coli O157:H7 str. EDL933]
DTU_2024_1035961_100_SI_LVK_94_SE.fq.gz_flye.fasta	DTU_2024_1035961_100_SI_LVK_94_SE.fq.gz_flye_contig_5	35490	36158	-	yagY/ecpB	1-669/669	===============	0/0	100	98.21	vfdb	NP_286009	(yagY/ecpB) E. coli common pilus chaperone EcpB [ECP (VF0404)] [Escherichia coli O157:H7 str. EDL933]
DTU_2024_1035961_100_SI_LVK_94_SE.fq.gz_flye.fasta	DTU_2024_1035961_100_SI_LVK_94_SE.fq.gz_flye_contig_5	36216	36803	-	yagZ/ecpA	1-588/588	===============	0/0	100	99.15	vfdb	NP_286010	(yagZ/ecpA) E. coli common pilus structural subunit EcpA [ECP (VF0404)] [Escherichia coli O157:H7 str. EDL933]
DTU_2024_1035961_100_SI_LVK_94_SE.fq.gz_flye.fasta	DTU_2024_1035961_100_SI_LVK_94_SE.fq.gz_flye_contig_5	36878	37468	-	ykgK/ecpR	1-591/591	===============	0/0	100	96.78	vfdb	NP_286011	(ykgK/ecpR) regulator protein EcpR [ECP (VF0404)] [Escherichia coli O157:H7 str. EDL933]
DTU_2024_1035961_100_SI_LVK_94_SE.fq.gz_flye.fasta	DTU_2024_1035961_100_SI_LVK_94_SE.fq.gz_flye_contig_5	40489	44737	+	fdeC	1-4246/4251	========/======	2025-03-01	99.88	94.14	vfdb	YP_002390132	(fdeC) adhesin FdeC [FdeC (VF0506)] [Escherichia coli O45:K1:H7 str. S88]
DTU_2024_1035961_100_SI_LVK_94_SE.fq.gz_flye.fasta	DTU_2024_1035961_100_SI_LVK_94_SE.fq.gz_flye_contig_5	325393	326163	-	entD	1-771/771	===============	0/0	100	94.16	vfdb	NP_752599	(entD) phosphopantetheinyl transferase component of enterobactin synthase multienzyme complex [Enterobactin (VF0228)] [Escherichia coli CFT073]
DTU_2024_1035961_100_SI_LVK_94_SE.fq.gz_flye.fasta	DTU_2024_1035961_100_SI_LVK_94_SE.fq.gz_flye_contig_5	326188	328428	-	fepA	1-2241/2241	===============	0/0	100	96.83	vfdb	NP_752600	(fepA) ferrienterobactin outer membrane transporter [Enterobactin (VF0228)] [Escherichia coli CFT073]
DTU_2024_1035961_100_SI_LVK_94_SE.fq.gz_flye.fasta	DTU_2024_1035961_100_SI_LVK_94_SE.fq.gz_flye_contig_5	328671	329873	+	fes	1-1203/1203	===============	0/0	100	96.59	vfdb	NP_752602	(fes) enterobactin/ferric enterobactin esterase [enterobactin (IA019)] [Escherichia coli CFT073]
DTU_2024_1035961_100_SI_LVK_94_SE.fq.gz_flye.fasta	DTU_2024_1035961_100_SI_LVK_94_SE.fq.gz_flye_contig_5	330091	333944	+	entF	1-3854/3882	===============	0/0	99.28	95.69	vfdb	NP_752604	(entF) enterobactin synthase multienzyme complex component ATP-dependent [Enterobactin (VF0228)] [Escherichia coli CFT073]
DTU_2024_1035961_100_SI_LVK_94_SE.fq.gz_flye.fasta	DTU_2024_1035961_100_SI_LVK_94_SE.fq.gz_flye_contig_5	335318	336133	-	fepC	1-816/816	===============	0/0	100	97.43	vfdb	NP_752606	(fepC) ferrienterobactin ABC transporter ATPase [Enterobactin (VF0228)] [Escherichia coli CFT073]
DTU_2024_1035961_100_SI_LVK_94_SE.fq.gz_flye.fasta	DTU_2024_1035961_100_SI_LVK_94_SE.fq.gz_flye_contig_5	336130	337122	-	fepG	1-993/993	===============	0/0	100	94.46	vfdb	NP_752607	(fepG) iron-enterobactin ABC transporter permease [Enterobactin (VF0228)] [Escherichia coli CFT073]
DTU_2024_1035961_100_SI_LVK_94_SE.fq.gz_flye.fasta	DTU_2024_1035961_100_SI_LVK_94_SE.fq.gz_flye_contig_5	337119	338135	-	fepD	1-1017/1017	===============	0/0	100	96.07	vfdb	NP_752608	(fepD) ferrienterobactin ABC transporter permease [Enterobactin (VF0228)] [Escherichia coli CFT073]
DTU_2024_1035961_100_SI_LVK_94_SE.fq.gz_flye.fasta	DTU_2024_1035961_100_SI_LVK_94_SE.fq.gz_flye_contig_5	338234	339484	+	entS	1-1251/1251	===============	0/0	100	96.08	vfdb	NP_752609	(entS) enterobactin exporter iron-regulated [enterobactin (IA019)] [Escherichia coli CFT073]
DTU_2024_1035961_100_SI_LVK_94_SE.fq.gz_flye.fasta	DTU_2024_1035961_100_SI_LVK_94_SE.fq.gz_flye_contig_5	339488	340444	-	fepB	1-957/957	===============	0/0	100	97.49	vfdb	NP_752610	(fepB) ferrienterobactin ABC transporter periplasmic binding protein [Enterobactin (VF0228)] [Escherichia coli CFT073]
DTU_2024_1035961_100_SI_LVK_94_SE.fq.gz_flye.fasta	DTU_2024_1035961_100_SI_LVK_94_SE.fq.gz_flye_contig_5	340621	341808	+	entC	1-1188/1188	===============	0/0	100	97.14	vfdb	NP_752611	(entC) isochorismate synthase 1 [Enterobactin (VF0228)] [Escherichia coli CFT073]
DTU_2024_1035961_100_SI_LVK_94_SE.fq.gz_flye.fasta	DTU_2024_1035961_100_SI_LVK_94_SE.fq.gz_flye_contig_5	341818	343428	+	entE	1-1611/1611	===============	0/0	100	95.59	vfdb	NP_752612	(entE) 23-dihydroxybenzoate-AMP ligase component of enterobactin synthase multienzyme complex [Enterobactin (VF0228)] [Escherichia coli CFT073]
DTU_2024_1035961_100_SI_LVK_94_SE.fq.gz_flye.fasta	DTU_2024_1035961_100_SI_LVK_94_SE.fq.gz_flye_contig_5	343442	344299	+	entB	1-858/858	===============	0/0	100	98.37	vfdb	NP_752613	(entB) isochorismatase [Enterobactin (VF0228)] [Escherichia coli CFT073]
DTU_2024_1035961_100_SI_LVK_94_SE.fq.gz_flye.fasta	DTU_2024_1035961_100_SI_LVK_94_SE.fq.gz_flye_contig_5	344299	345045	+	entA	1-747/747	===============	0/0	100	95.85	vfdb	NP_752614	(entA) 23-dihydro-23-dihydroxybenzoate dehydrogenase [Enterobactin (VF0228)] [Escherichia coli CFT073]
DTU_2024_1035961_100_SI_LVK_94_SE.fq.gz_flye.fasta	DTU_2024_1035961_100_SI_LVK_94_SE.fq.gz_flye_contig_7	223222	224641	+	espX1	1-1422/1422	========/======	2025-02-02	99.86	95.22	vfdb	NP_285716	(espX1) Type III secretion system effector EspX1 [LEE encoded T3SS (SS020)] [Escherichia coli O157:H7 str. EDL933]
DTU_2024_1035961_100_SI_LVK_94_SE.fq.gz_flye.fasta	DTU_2024_1035961_100_SI_LVK_94_SE.fq.gz_flye_contig_8	30699	31991	+	espX5	1-1293/1293	===============	0/0	100	96.6	vfdb	NP_290699	(espX5) Type III secretion system effector EspX5 [LEE encoded T3SS (SS020)] [Escherichia coli O157:H7 str. EDL933]
DTU_2024_1035961_100_SI_LVK_94_SE.fq.gz_flye.fasta	DTU_2024_1035961_100_SI_LVK_94_SE.fq.gz_flye_contig_8	61490	63070	-	espX4	1-1581/1581	========/======	2025-02-02	99.94	93.36	vfdb	NP_290672	(espX4) Type III secretion system effector EspX4 [LEE encoded T3SS (SS020)] [Escherichia coli O157:H7 str. EDL933]
DTU_2024_1035962_100_SI_LVK_97_SE.fq.gz_flye.fasta	DTU_2024_1035962_100_SI_LVK_97_SE.fq.gz_flye_contig_1	115108	116160	-	ompA	1-1041/1041	========/======	2025-12-01	100	94.59	vfdb	AAF37887	(ompA) outer membrane protein A [OmpA (VF0236)] [Escherichia coli O18:K1:H7 str. RS218]
DTU_2024_1035962_100_SI_LVK_97_SE.fq.gz_flye.fasta	DTU_2024_1035962_100_SI_LVK_97_SE.fq.gz_flye_contig_19	68653	69406	-	yagV/ecpE	1-754/756	===============	0/0	99.74	96.95	vfdb	NP_286006	(yagV/ecpE) E. coli common pilus chaperone EcpE [ECP (VF0404)] [Escherichia coli O157:H7 str. EDL933]
DTU_2024_1035962_100_SI_LVK_97_SE.fq.gz_flye.fasta	DTU_2024_1035962_100_SI_LVK_97_SE.fq.gz_flye_contig_19	69330	70973	-	yagW/ecpD	1-1644/1644	===============	0/0	100	99.27	vfdb	NP_286007	(yagW/ecpD) polymerized tip adhesin of ECP fibers [ECP (VF0404)] [Escherichia coli O157:H7 str. EDL933]
DTU_2024_1035962_100_SI_LVK_97_SE.fq.gz_flye.fasta	DTU_2024_1035962_100_SI_LVK_97_SE.fq.gz_flye_contig_19	70963	73488	-	yagX/ecpC	1-2526/2526	===============	0/0	100	98.77	vfdb	NP_286008	(yagX/ecpC) E. coli common pilus usher EcpC [ECP (VF0404)] [Escherichia coli O157:H7 str. EDL933]
DTU_2024_1035962_100_SI_LVK_97_SE.fq.gz_flye.fasta	DTU_2024_1035962_100_SI_LVK_97_SE.fq.gz_flye_contig_19	73514	74182	-	yagY/ecpB	1-669/669	===============	0/0	100	98.21	vfdb	NP_286009	(yagY/ecpB) E. coli common pilus chaperone EcpB [ECP (VF0404)] [Escherichia coli O157:H7 str. EDL933]
DTU_2024_1035962_100_SI_LVK_97_SE.fq.gz_flye.fasta	DTU_2024_1035962_100_SI_LVK_97_SE.fq.gz_flye_contig_19	74240	74827	-	yagZ/ecpA	1-588/588	===============	0/0	100	99.15	vfdb	NP_286010	(yagZ/ecpA) E. coli common pilus structural subunit EcpA [ECP (VF0404)] [Escherichia coli O157:H7 str. EDL933]
DTU_2024_1035962_100_SI_LVK_97_SE.fq.gz_flye.fasta	DTU_2024_1035962_100_SI_LVK_97_SE.fq.gz_flye_contig_19	74902	75492	-	ykgK/ecpR	1-591/591	===============	0/0	100	96.78	vfdb	NP_286011	(ykgK/ecpR) regulator protein EcpR [ECP (VF0404)] [Escherichia coli O157:H7 str. EDL933]
DTU_2024_1035962_100_SI_LVK_97_SE.fq.gz_flye.fasta	DTU_2024_1035962_100_SI_LVK_97_SE.fq.gz_flye_contig_19	78513	82761	+	fdeC	1-4246/4251	========/======	2025-03-01	99.88	94.12	vfdb	YP_002390132	(fdeC) adhesin FdeC [FdeC (VF0506)] [Escherichia coli O45:K1:H7 str. S88]
DTU_2024_1035962_100_SI_LVK_97_SE.fq.gz_flye.fasta	DTU_2024_1035962_100_SI_LVK_97_SE.fq.gz_flye_contig_19	362705	363475	-	entD	1-771/771	===============	0/0	100	94.16	vfdb	NP_752599	(entD) phosphopantetheinyl transferase component of enterobactin synthase multienzyme complex [Enterobactin (VF0228)] [Escherichia coli CFT073]
DTU_2024_1035962_100_SI_LVK_97_SE.fq.gz_flye.fasta	DTU_2024_1035962_100_SI_LVK_97_SE.fq.gz_flye_contig_19	363500	365740	-	fepA	1-2241/2241	===============	0/0	100	96.83	vfdb	NP_752600	(fepA) ferrienterobactin outer membrane transporter [Enterobactin (VF0228)] [Escherichia coli CFT073]
DTU_2024_1035962_100_SI_LVK_97_SE.fq.gz_flye.fasta	DTU_2024_1035962_100_SI_LVK_97_SE.fq.gz_flye_contig_19	365983	367185	+	fes	1-1203/1203	===============	0/0	100	96.59	vfdb	NP_752602	(fes) enterobactin/ferric enterobactin esterase [enterobactin (IA019)] [Escherichia coli CFT073]
DTU_2024_1035962_100_SI_LVK_97_SE.fq.gz_flye.fasta	DTU_2024_1035962_100_SI_LVK_97_SE.fq.gz_flye_contig_19	367403	371256	+	entF	1-3854/3882	===============	0/0	99.28	95.72	vfdb	NP_752604	(entF) enterobactin synthase multienzyme complex component ATP-dependent [Enterobactin (VF0228)] [Escherichia coli CFT073]
DTU_2024_1035962_100_SI_LVK_97_SE.fq.gz_flye.fasta	DTU_2024_1035962_100_SI_LVK_97_SE.fq.gz_flye_contig_19	372630	373445	-	fepC	1-816/816	===============	0/0	100	97.43	vfdb	NP_752606	(fepC) ferrienterobactin ABC transporter ATPase [Enterobactin (VF0228)] [Escherichia coli CFT073]
DTU_2024_1035962_100_SI_LVK_97_SE.fq.gz_flye.fasta	DTU_2024_1035962_100_SI_LVK_97_SE.fq.gz_flye_contig_19	373442	374434	-	fepG	1-993/993	===============	0/0	100	94.46	vfdb	NP_752607	(fepG) iron-enterobactin ABC transporter permease [Enterobactin (VF0228)] [Escherichia coli CFT073]
DTU_2024_1035962_100_SI_LVK_97_SE.fq.gz_flye.fasta	DTU_2024_1035962_100_SI_LVK_97_SE.fq.gz_flye_contig_19	374431	375447	-	fepD	1-1017/1017	===============	0/0	100	95.97	vfdb	NP_752608	(fepD) ferrienterobactin ABC transporter permease [Enterobactin (VF0228)] [Escherichia coli CFT073]
DTU_2024_1035962_100_SI_LVK_97_SE.fq.gz_flye.fasta	DTU_2024_1035962_100_SI_LVK_97_SE.fq.gz_flye_contig_19	375546	376796	+	entS	1-1251/1251	===============	0/0	100	96.08	vfdb	NP_752609	(entS) enterobactin exporter iron-regulated [enterobactin (IA019)] [Escherichia coli CFT073]
DTU_2024_1035962_100_SI_LVK_97_SE.fq.gz_flye.fasta	DTU_2024_1035962_100_SI_LVK_97_SE.fq.gz_flye_contig_19	376800	377756	-	fepB	1-957/957	===============	0/0	100	97.49	vfdb	NP_752610	(fepB) ferrienterobactin ABC transporter periplasmic binding protein [Enterobactin (VF0228)] [Escherichia coli CFT073]
DTU_2024_1035962_100_SI_LVK_97_SE.fq.gz_flye.fasta	DTU_2024_1035962_100_SI_LVK_97_SE.fq.gz_flye_contig_19	377933	379120	+	entC	1-1188/1188	===============	0/0	100	97.14	vfdb	NP_752611	(entC) isochorismate synthase 1 [Enterobactin (VF0228)] [Escherichia coli CFT073]
DTU_2024_1035962_100_SI_LVK_97_SE.fq.gz_flye.fasta	DTU_2024_1035962_100_SI_LVK_97_SE.fq.gz_flye_contig_19	379130	380740	+	entE	1-1611/1611	===============	0/0	100	95.59	vfdb	NP_752612	(entE) 23-dihydroxybenzoate-AMP ligase component of enterobactin synthase multienzyme complex [Enterobactin (VF0228)] [Escherichia coli CFT073]
DTU_2024_1035962_100_SI_LVK_97_SE.fq.gz_flye.fasta	DTU_2024_1035962_100_SI_LVK_97_SE.fq.gz_flye_contig_19	380754	381611	+	entB	1-858/858	===============	0/0	100	98.37	vfdb	NP_752613	(entB) isochorismatase [Enterobactin (VF0228)] [Escherichia coli CFT073]
DTU_2024_1035962_100_SI_LVK_97_SE.fq.gz_flye.fasta	DTU_2024_1035962_100_SI_LVK_97_SE.fq.gz_flye_contig_19	381611	382357	+	entA	1-747/747	===============	0/0	100	95.85	vfdb	NP_752614	(entA) 23-dihydro-23-dihydroxybenzoate dehydrogenase [Enterobactin (VF0228)] [Escherichia coli CFT073]
DTU_2024_1035962_100_SI_LVK_97_SE.fq.gz_flye.fasta	DTU_2024_1035962_100_SI_LVK_97_SE.fq.gz_flye_contig_2	346739	348031	+	espX5	1-1293/1293	===============	0/0	100	96.6	vfdb	NP_290699	(espX5) Type III secretion system effector EspX5 [LEE encoded T3SS (SS020)] [Escherichia coli O157:H7 str. EDL933]
DTU_2024_1035962_100_SI_LVK_97_SE.fq.gz_flye.fasta	DTU_2024_1035962_100_SI_LVK_97_SE.fq.gz_flye_contig_2	377530	379110	-	espX4	1-1581/1581	========/======	2025-02-02	99.94	93.36	vfdb	NP_290672	(espX4) Type III secretion system effector EspX4 [LEE encoded T3SS (SS020)] [Escherichia coli O157:H7 str. EDL933]
DTU_2024_1035962_100_SI_LVK_97_SE.fq.gz_flye.fasta	DTU_2024_1035962_100_SI_LVK_97_SE.fq.gz_flye_contig_28	36627	37240	+	hlyC	41-675/675	========/======	2021-04-01	90.96	90.08	vfdb	NP_755444	(hlyC) Hemolysin C [Hemolysin (VF0225)] [Escherichia coli CFT073]
DTU_2024_1035962_100_SI_LVK_97_SE.fq.gz_flye.fasta	DTU_2024_1035962_100_SI_LVK_97_SE.fq.gz_flye_contig_28	37252	40326	+	hlyA	1-3075/3075	===============	0/0	100	97.11	vfdb	NP_755445	(hlyA) Hemolysin A [Hemolysin (VF0225)] [Escherichia coli CFT073]
DTU_2024_1035962_100_SI_LVK_97_SE.fq.gz_flye.fasta	DTU_2024_1035962_100_SI_LVK_97_SE.fq.gz_flye_contig_28	40398	42521	+	hlyB	1-2124/2124	===============	0/0	100	98.07	vfdb	NP_755448	(hlyB) Hemolysin B [Hemolysin (VF0225)] [Escherichia coli CFT073]
DTU_2024_1035962_100_SI_LVK_97_SE.fq.gz_flye.fasta	DTU_2024_1035962_100_SI_LVK_97_SE.fq.gz_flye_contig_28	42540	43976	+	hlyD	1-1437/1437	===============	0/0	100	96.66	vfdb	NP_755449	(hlyD) Hemolysin D [Hemolysin (VF0225)] [Escherichia coli CFT073]
DTU_2024_1035962_100_SI_LVK_97_SE.fq.gz_flye.fasta	DTU_2024_1035962_100_SI_LVK_97_SE.fq.gz_flye_contig_28	45763	45879	+	astA	1-117/117	===============	0/0	100	100	vfdb	BAA94855	(astA) heat-stable enterotoxin 1 [EAST1 (VF0216)] [Escherichia coli O44:H18 042]
DTU_2024_1035962_100_SI_LVK_97_SE.fq.gz_flye.fasta	DTU_2024_1035962_100_SI_LVK_97_SE.fq.gz_flye_contig_30	101085	102504	+	espX1	1-1422/1422	========/======	2025-02-02	99.86	95.22	vfdb	NP_285716	(espX1) Type III secretion system effector EspX1 [LEE encoded T3SS (SS020)] [Escherichia coli O157:H7 str. EDL933]
DTU_2024_1035962_100_SI_LVK_97_SE.fq.gz_flye.fasta	DTU_2024_1035962_100_SI_LVK_97_SE.fq.gz_flye_contig_4	20105	20221	-	astA	1-117/117	===============	0/0	100	99.14	vfdb	BAA94855	(astA) heat-stable enterotoxin 1 [EAST1 (VF0216)] [Escherichia coli O44:H18 042]
DTU_2024_1035962_100_SI_LVK_97_SE.fq.gz_flye.fasta	DTU_2024_1035962_100_SI_LVK_97_SE.fq.gz_flye_contig_4	29799	30575	+	eltA	1-777/777	===============	0/0	100	99.36	vfdb	AAA24685	(eltA) heat-labile enterotoxin A prepeptide (from human) [Heat-labile toxin (LT) (VF0210)] [Escherichia coli]
DTU_2024_1035962_100_SI_LVK_97_SE.fq.gz_flye.fasta	DTU_2024_1035962_100_SI_LVK_97_SE.fq.gz_flye_contig_4	30572	30946	+	eltB	1-375/375	===============	0/0	100	98.4	vfdb	AAA98064	(eltB) enterotoxin subunit B (from human) [Heat-labile toxin (LT) (VF0210)] [Escherichia coli]
DTU_2024_1035962_100_SI_LVK_97_SE.fq.gz_flye.fasta	DTU_2024_1035962_100_SI_LVK_97_SE.fq.gz_flye_contig_4	40821	41594	-	faeJ	1-774/774	===============	0/0	100	99.87	vfdb	YP_002295991	(faeJ) fimbrial protein FaeJ [K88 pili/F4 fimbriae (AI040)] [Escherichia coli SE11]
DTU_2024_1035962_100_SI_LVK_97_SE.fq.gz_flye.fasta	DTU_2024_1035962_100_SI_LVK_97_SE.fq.gz_flye_contig_4	41611	42375	-	faeI	1-765/765	===============	0/0	100	99.74	vfdb	YP_002295990	(faeI) fimbrial protein FaeI [K88 pili/F4 fimbriae (AI040)] [Escherichia coli SE11]
DTU_2024_1035962_100_SI_LVK_97_SE.fq.gz_flye.fasta	DTU_2024_1035962_100_SI_LVK_97_SE.fq.gz_flye_contig_4	42405	43202	-	faeH	1-798/798	===============	0/0	100	99.62	vfdb	YP_002295989	(faeH) fimbrial protein FaeH [K88 pili/F4 fimbriae (AI040)] [Escherichia coli SE11]
DTU_2024_1035962_100_SI_LVK_97_SE.fq.gz_flye.fasta	DTU_2024_1035962_100_SI_LVK_97_SE.fq.gz_flye_contig_4	44461	44952	-	faeF	1-492/492	===============	0/0	100	98.58	vfdb	YP_002295987	(faeF) fimbrial protein FaeF [K88 pili/F4 fimbriae (AI040)] [Escherichia coli SE11]
DTU_2024_1035962_100_SI_LVK_97_SE.fq.gz_flye.fasta	DTU_2024_1035962_100_SI_LVK_97_SE.fq.gz_flye_contig_4	44987	45763	-	faeE	1-777/777	===============	0/0	100	98.2	vfdb	YP_002295986	(faeE) fimbrial chaperone FaeE [K88 pili/F4 fimbriae (AI040)] [Escherichia coli SE11]
DTU_2024_1035962_100_SI_LVK_97_SE.fq.gz_flye.fasta	DTU_2024_1035962_100_SI_LVK_97_SE.fq.gz_flye_contig_4	45756	48193	-	faeD	1-2439/2439	========/======	2025-01-01	99.96	99.47	vfdb	YP_002295985	(faeD) fimbrial usher protein FaeD [K88 pili/F4 fimbriae (AI040)] [Escherichia coli SE11]
DTU_2024_1035962_100_SI_LVK_97_SE.fq.gz_flye.fasta	DTU_2024_1035962_100_SI_LVK_97_SE.fq.gz_flye_contig_4	48205	48750	-	faeC	1-546/546	===============	0/0	100	99.82	vfdb	AAL47165	(faeC) FaeC [K88 pili/F4 fimbriae (AI040)] [Escherichia coli]
DTU_2024_1035962_100_SI_LVK_97_SE.fq.gz_flye.fasta	DTU_2024_1035962_100_SI_LVK_97_SE.fq.gz_flye_contig_5	13291	14042	+	paa	1-752/759	===============	0/0	99.08	90.82	vfdb	NP_287515	(paa) outer membrane adhesin Paa [Paa (VF0194)] [Escherichia coli O157:H7 str. EDL933]
DTU_2024_1035962_100_SI_LVK_97_SE.fq.gz_flye.fasta	DTU_2024_1035962_100_SI_LVK_97_SE.fq.gz_flye_contig_7	17537	18965	+	aslA	1-1428/1428	========/======	2025-01-01	100	92.93	vfdb	AAG10151	(aslA) putative arylsulfatase [AslA (VF0238)] [Escherichia coli O18:K1:H7 str. RS218]
DTU_2024_1035962_100_SI_LVK_97_SE.fq.gz_flye.fasta	DTU_2024_1035962_100_SI_LVK_97_SE.fq.gz_flye_contig_7	946211	947041	+	gspC	1-831/831	===============	0/0	100	95.31	vfdb	YP_404599	(gspC) general secretion pathway protein C [T2SS (VF0333)] [Shigella dysenteriae Sd197]
DTU_2024_1035962_100_SI_LVK_97_SE.fq.gz_flye.fasta	DTU_2024_1035962_100_SI_LVK_97_SE.fq.gz_flye_contig_7	947281	949131	+	gspD	1-1836/1836	========/======	2015-01-01	100	97.73	vfdb	YP_404600	(gspD) general secretion pathway protein D [T2SS (VF0333)] [Shigella dysenteriae Sd197]
DTU_2024_1035962_100_SI_LVK_97_SE.fq.gz_flye.fasta	DTU_2024_1035962_100_SI_LVK_97_SE.fq.gz_flye_contig_7	949131	950624	+	gspE	1-1494/1494	===============	0/0	100	96.19	vfdb	YP_404601	(gspE) general secretion pathway protein E [T2SS (VF0333)] [Shigella dysenteriae Sd197]
DTU_2024_1035962_100_SI_LVK_97_SE.fq.gz_flye.fasta	DTU_2024_1035962_100_SI_LVK_97_SE.fq.gz_flye_contig_7	950624	951823	+	gspF	1-1200/1200	===============	0/0	100	96.75	vfdb	YP_404602	(gspF) general secretion pathway protein F [T2SS (VF0333)] [Shigella dysenteriae Sd197]
DTU_2024_1035962_100_SI_LVK_97_SE.fq.gz_flye.fasta	DTU_2024_1035962_100_SI_LVK_97_SE.fq.gz_flye_contig_7	951864	952319	+	gspG	1-456/456	===============	0/0	100	95.61	vfdb	YP_404603	(gspG) general secretion pathway protein G [T2SS (VF0333)] [Shigella dysenteriae Sd197]
DTU_2024_1035962_100_SI_LVK_97_SE.fq.gz_flye.fasta	DTU_2024_1035962_100_SI_LVK_97_SE.fq.gz_flye_contig_7	952356	952886	+	gspH	1-531/531	===============	0/0	100	95.1	vfdb	YP_404604	(gspH) general secretion pathway protein H [T2SS (VF0333)] [Shigella dysenteriae Sd197]
DTU_2024_1035962_100_SI_LVK_97_SE.fq.gz_flye.fasta	DTU_2024_1035962_100_SI_LVK_97_SE.fq.gz_flye_contig_7	952883	953254	+	gspI	1-372/372	===============	0/0	100	94.89	vfdb	YP_404605	(gspI) general secretion pathway protein I [T2SS (VF0333)] [Shigella dysenteriae Sd197]
DTU_2024_1035962_100_SI_LVK_97_SE.fq.gz_flye.fasta	DTU_2024_1035962_100_SI_LVK_97_SE.fq.gz_flye_contig_7	953287	953856	+	gspJ	1-570/570	===============	0/0	100	97.02	vfdb	YP_404606	(gspJ) general secretion pathway protein J [T2SS (VF0333)] [Shigella dysenteriae Sd197]
DTU_2024_1035962_100_SI_LVK_97_SE.fq.gz_flye.fasta	DTU_2024_1035962_100_SI_LVK_97_SE.fq.gz_flye_contig_7	953853	954830	+	gspK	1-978/978	===============	0/0	100	96.42	vfdb	YP_404607	(gspK) general secretion pathway protein K [T2SS (VF0333)] [Shigella dysenteriae Sd197]
DTU_2024_1035962_100_SI_LVK_97_SE.fq.gz_flye.fasta	DTU_2024_1035962_100_SI_LVK_97_SE.fq.gz_flye_contig_7	955145	956005	+	gspL	1-861/861	===============	0/0	100	97.79	vfdb	YP_404608	(gspL) general secretion pathway protein L [T2SS (VF0333)] [Shigella dysenteriae Sd197]
DTU_2024_1035962_100_SI_LVK_97_SE.fq.gz_flye.fasta	DTU_2024_1035962_100_SI_LVK_97_SE.fq.gz_flye_contig_7	956121	956543	+	gspM	1-423/423	===============	0/0	100	94.56	vfdb	YP_404609	(gspM) general secretion pathway protein M [T2SS (VF0333)] [Shigella dysenteriae Sd197]
DTU_2024_1035962_100_SI_LVK_97_SE.fq.gz_flye.fasta	DTU_2024_1035962_100_SI_LVK_97_SE.fq.gz_flye_contig_8	329926	331824	+	espL1	1-1899/1899	===============	0/0	100	96.37	vfdb	NP_288154	(espL1) Type III secretion system effector espL1 [LEE encoded T3SS (SS020)] [Escherichia coli O157:H7 str. EDL933]
DTU_2024_1035963_100_SI_LVK_98_SE.fq.gz_flye.fasta	DTU_2024_1035963_100_SI_LVK_98_SE.fq.gz_flye_contig_10	72429	73481	+	ompA	1-1041/1041	========/======	2025-12-01	100	94.11	vfdb	AAF37887	(ompA) outer membrane protein A [OmpA (VF0236)] [Escherichia coli O18:K1:H7 str. RS218]
DTU_2024_1035963_100_SI_LVK_98_SE.fq.gz_flye.fasta	DTU_2024_1035963_100_SI_LVK_98_SE.fq.gz_flye_contig_10	291683	292530	-	cif	1-849/849	========/======	2025-01-01	99.88	99.88	vfdb	AAN07916	(cif) Type III secretion system effector Cif cyclomodulin [Cif (VF0205)] [Escherichia coli O26 str. C/15333]
DTU_2024_1035963_100_SI_LVK_98_SE.fq.gz_flye.fasta	DTU_2024_1035963_100_SI_LVK_98_SE.fq.gz_flye_contig_10	292754	293635	-	nleH1	1-882/882	===============	0/0	100	93.42	vfdb	NP_286534	(nleH1) Type III secretion system effector NleH1 [LEE encoded T3SS (SS020)] [Escherichia coli O157:H7 str. EDL933]
DTU_2024_1035963_100_SI_LVK_98_SE.fq.gz_flye.fasta	DTU_2024_1035963_100_SI_LVK_98_SE.fq.gz_flye_contig_11	212984	214883	-	espL1	1-1899/1899	========/======	2025-01-01	100	97.37	vfdb	NP_288154	(espL1) Type III secretion system effector espL1 [LEE encoded T3SS (SS020)] [Escherichia coli O157:H7 str. EDL933]
DTU_2024_1035963_100_SI_LVK_98_SE.fq.gz_flye.fasta	DTU_2024_1035963_100_SI_LVK_98_SE.fq.gz_flye_contig_14	2185	2403	+	escE	1-219/219	===============	0/0	100	99.54	vfdb	NP_290287	(escE) chaperone for EscF [LEE encoded T3SS (SS020)] [Escherichia coli O157:H7 str. EDL933]
DTU_2024_1035963_100_SI_LVK_98_SE.fq.gz_flye.fasta	DTU_2024_1035963_100_SI_LVK_98_SE.fq.gz_flye_contig_14	2407	2730	+	cesAB	1-324/324	===============	0/0	100	99.69	vfdb	NP_290286	(cesAB) chaperone for EspA and EspB [LEE encoded T3SS (SS020)] [Escherichia coli O157:H7 str. EDL933]
DTU_2024_1035963_100_SI_LVK_98_SE.fq.gz_flye.fasta	DTU_2024_1035963_100_SI_LVK_98_SE.fq.gz_flye_contig_14	3352	3966	+	escL	1-615/615	===============	0/0	100	99.67	vfdb	NP_290284	(escL) negative regulator EscL stator protein [LEE encoded T3SS (SS020)] [Escherichia coli O157:H7 str. EDL933]
DTU_2024_1035963_100_SI_LVK_98_SE.fq.gz_flye.fasta	DTU_2024_1035963_100_SI_LVK_98_SE.fq.gz_flye_contig_14	3971	4624	+	escR	1-654/654	===============	0/0	100	99.85	vfdb	NP_290283	(escR) Type III secretion systemminor export apparatus protein EscR [TTSS (VF0191)] [Escherichia coli O157:H7 str. EDL933]
DTU_2024_1035963_100_SI_LVK_98_SE.fq.gz_flye.fasta	DTU_2024_1035963_100_SI_LVK_98_SE.fq.gz_flye_contig_14	4624	4893	+	escS	1-270/270	===============	0/0	100	99.63	vfdb	NP_290282	(escS) Type III secretion systemminor export apparatus protein EscS [TTSS (VF0191)] [Escherichia coli O157:H7 str. EDL933]
DTU_2024_1035963_100_SI_LVK_98_SE.fq.gz_flye.fasta	DTU_2024_1035963_100_SI_LVK_98_SE.fq.gz_flye_contig_14	4893	5669	+	escT	1-777/777	===============	0/0	100	99.61	vfdb	NP_290281	(escT) Type III secretion system minor export apparatus protein EscT [TTSS (VF0191)] [Escherichia coli O157:H7 str. EDL933]
DTU_2024_1035963_100_SI_LVK_98_SE.fq.gz_flye.fasta	DTU_2024_1035963_100_SI_LVK_98_SE.fq.gz_flye_contig_14	5662	6699	+	escU	1-1038/1038	===============	0/0	100	99.61	vfdb	NP_290280	(escU) Type III secretion system export apparatus switch protein EscU [TTSS (VF0191)] [Escherichia coli O157:H7 str. EDL933]
DTU_2024_1035963_100_SI_LVK_98_SE.fq.gz_flye.fasta	DTU_2024_1035963_100_SI_LVK_98_SE.fq.gz_flye_contig_14	6696	7154	-	etgA	1-459/459	===============	0/0	100	99.13	vfdb	NP_290279	(etgA) T3SS-associated peptidoglycan lytic enzyme [LEE encoded T3SS (SS020)] [Escherichia coli O157:H7 str. EDL933]
DTU_2024_1035963_100_SI_LVK_98_SE.fq.gz_flye.fasta	DTU_2024_1035963_100_SI_LVK_98_SE.fq.gz_flye_contig_14	8574	9029	-	cesD	1-456/456	===============	0/0	100	99.78	vfdb	NP_290276	(cesD) chaperone for EspB and EspD [TTSS (VF0191)] [Escherichia coli O157:H7 str. EDL933]
DTU_2024_1035963_100_SI_LVK_98_SE.fq.gz_flye.fasta	DTU_2024_1035963_100_SI_LVK_98_SE.fq.gz_flye_contig_14	9043	10581	-	escC	1-1539/1539	===============	0/0	100	99.55	vfdb	NP_290275	(escC) Type III secretion system secretin EscC [TTSS (VF0191)] [Escherichia coli O157:H7 str. EDL933]
DTU_2024_1035963_100_SI_LVK_98_SE.fq.gz_flye.fasta	DTU_2024_1035963_100_SI_LVK_98_SE.fq.gz_flye_contig_14	10581	11036	-	sepD	1-456/456	===============	0/0	100	98.68	vfdb	NP_290274	(sepD) Type III secretion system secretion switch protein SepD [LEE encoded T3SS (SS020)] [Escherichia coli O157:H7 str. EDL933]
DTU_2024_1035963_100_SI_LVK_98_SE.fq.gz_flye.fasta	DTU_2024_1035963_100_SI_LVK_98_SE.fq.gz_flye_contig_14	11042	11614	-	escJ	1-573/573	===============	0/0	100	98.95	vfdb	NP_290273	(escJ) Type III secretion system inner MS ring protein EscJ [TTSS (VF0191)] [Escherichia coli O157:H7 str. EDL933]
DTU_2024_1035963_100_SI_LVK_98_SE.fq.gz_flye.fasta	DTU_2024_1035963_100_SI_LVK_98_SE.fq.gz_flye_contig_14	11617	12045	-	escI	1-429/429	===============	0/0	100	93.24	vfdb	NP_290272	(escI) Type III secretion system inner rod component EscI [LEE encoded T3SS (SS020)] [Escherichia coli O157:H7 str. EDL933]
DTU_2024_1035963_100_SI_LVK_98_SE.fq.gz_flye.fasta	DTU_2024_1035963_100_SI_LVK_98_SE.fq.gz_flye_contig_14	12558	12911	+	cesL	1-354/354	===============	0/0	100	99.44	vfdb	NP_290270	(cesL) chaperone for SepL [LEE encoded T3SS (SS020)] [Escherichia coli O157:H7 str. EDL933]
DTU_2024_1035963_100_SI_LVK_98_SE.fq.gz_flye.fasta	DTU_2024_1035963_100_SI_LVK_98_SE.fq.gz_flye_contig_14	12908	14935	+	escV	1-2028/2028	===============	0/0	100	97.98	vfdb	NP_290269	(escV) Type III secretion system major export apparatus protein [TTSS (VF0191)] [Escherichia coli O157:H7 str. EDL933]
DTU_2024_1035963_100_SI_LVK_98_SE.fq.gz_flye.fasta	DTU_2024_1035963_100_SI_LVK_98_SE.fq.gz_flye_contig_14	14919	16259	+	escN	1-1341/1341	===============	0/0	100	98.21	vfdb	NP_290268	(escN) ATPase EscN [TTSS (VF0191)] [Escherichia coli O157:H7 str. EDL933]
DTU_2024_1035963_100_SI_LVK_98_SE.fq.gz_flye.fasta	DTU_2024_1035963_100_SI_LVK_98_SE.fq.gz_flye_contig_14	16262	16639	+	escO	1-378/378	===============	0/0	100	98.41	vfdb	NP_290267	(escO) positive regulator EscO [LEE encoded T3SS (SS020)] [Escherichia coli O157:H7 str. EDL933]
DTU_2024_1035963_100_SI_LVK_98_SE.fq.gz_flye.fasta	DTU_2024_1035963_100_SI_LVK_98_SE.fq.gz_flye_contig_14	16773	17048	+	escP	1-276/276	===============	0/0	100	97.46	vfdb	NP_290266	(escP) Type III secretion system needle length regulator EscP [LEE encoded T3SS (SS020)] [Escherichia coli O157:H7 str. EDL933]
DTU_2024_1035963_100_SI_LVK_98_SE.fq.gz_flye.fasta	DTU_2024_1035963_100_SI_LVK_98_SE.fq.gz_flye_contig_14	17011	17928	+	sepQ/escQ	1-918/918	===============	0/0	100	93.14	vfdb	NP_290265	(sepQ/escQ) Type III secetion system C ring protein EscQ [TTSS (VF0191)] [Escherichia coli O157:H7 str. EDL933]
DTU_2024_1035963_100_SI_LVK_98_SE.fq.gz_flye.fasta	DTU_2024_1035963_100_SI_LVK_98_SE.fq.gz_flye_contig_14	21996	22466	+	cesT	1-471/471	===============	0/0	100	95.33	vfdb	NP_290260	(cesT) multieffector chaperone [LEE encoded T3SS (SS020)] [Escherichia coli O157:H7 str. EDL933]
DTU_2024_1035963_100_SI_LVK_98_SE.fq.gz_flye.fasta	DTU_2024_1035963_100_SI_LVK_98_SE.fq.gz_flye_contig_14	25648	26868	-	escD	1-1221/1221	===============	0/0	100	95	vfdb	NP_290258	(escD) Type III secretion system outer MS ring protein EscD [TTSS (VF0191)] [Escherichia coli O157:H7 str. EDL933]
DTU_2024_1035963_100_SI_LVK_98_SE.fq.gz_flye.fasta	DTU_2024_1035963_100_SI_LVK_98_SE.fq.gz_flye_contig_14	27011	28066	+	sepL	1-1056/1056	===============	0/0	100	91.1	vfdb	NP_290257	(sepL) Type III secretion system secretion gatekeeper SepL [TTSS (VF0191)] [Escherichia coli O157:H7 str. EDL933]
DTU_2024_1035963_100_SI_LVK_98_SE.fq.gz_flye.fasta	DTU_2024_1035963_100_SI_LVK_98_SE.fq.gz_flye_contig_14	28718	29860	+	espD	1-1143/1143	========/======	2025-02-02	99.91	91.43	vfdb	AAC38395	(espD) EspD [EspD (VF0180)] [Escherichia coli O127:H6 str. E2348/69]
DTU_2024_1035963_100_SI_LVK_98_SE.fq.gz_flye.fasta	DTU_2024_1035963_100_SI_LVK_98_SE.fq.gz_flye_contig_14	29881	30843	+	espB	1-966/966	========/======	2025-03-01	99.69	95.24	vfdb	AAC38396	(espB) EspB [EspB (VF0179)] [Escherichia coli O127:H6 str. E2348/69]
DTU_2024_1035963_100_SI_LVK_98_SE.fq.gz_flye.fasta	DTU_2024_1035963_100_SI_LVK_98_SE.fq.gz_flye_contig_14	30850	31256	+	cesD2	1-407/408	===============	0/0	99.75	97.79	vfdb	NP_290253	(cesD2) chaperone for EspD [LEE encoded T3SS (SS020)] [Escherichia coli O157:H7 str. EDL933]
DTU_2024_1035963_100_SI_LVK_98_SE.fq.gz_flye.fasta	DTU_2024_1035963_100_SI_LVK_98_SE.fq.gz_flye_contig_14	31292	31513	+	escF	1-222/222	===============	0/0	100	97.75	vfdb	NP_290252	(escF) Type III secretion system needle filament protein EscF [TTSS (VF0191)] [Escherichia coli O157:H7 str. EDL933]
DTU_2024_1035963_100_SI_LVK_98_SE.fq.gz_flye.fasta	DTU_2024_1035963_100_SI_LVK_98_SE.fq.gz_flye_contig_14	31519	31797	+	escG	1-279/279	===============	0/0	100	96.77	vfdb	NP_290251	(escG) chaperone for EscF [LEE encoded T3SS (SS020)] [Escherichia coli O157:H7 str. EDL933]
DTU_2024_1035963_100_SI_LVK_98_SE.fq.gz_flye.fasta	DTU_2024_1035963_100_SI_LVK_98_SE.fq.gz_flye_contig_14	38141	39337	+	espG	1-1197/1197	===============	0/0	100	97.74	vfdb	NP_290289	(espG) Type III secretion system effector EspG GTPase activating protein [EspG (VF0201)] [Escherichia coli O157:H7 str. EDL933]
DTU_2024_1035963_100_SI_LVK_98_SE.fq.gz_flye.fasta	DTU_2024_1035963_100_SI_LVK_98_SE.fq.gz_flye_contig_14	42200	42874	-	nleE	1-675/675	===============	0/0	100	99.56	vfdb	NP_289554	(nleE) Type III secretion system effector NleE [LEE encoded T3SS (SS020)] [Escherichia coli O157:H7 str. EDL933]
DTU_2024_1035963_100_SI_LVK_98_SE.fq.gz_flye.fasta	DTU_2024_1035963_100_SI_LVK_98_SE.fq.gz_flye_contig_14	42923	43912	-	nleB1	1-990/990	===============	0/0	100	99.09	vfdb	NP_289553	(nleB1) Type III secretion system effector nleB1 [LEE encoded T3SS (SS020)] [Escherichia coli O157:H7 str. EDL933]
DTU_2024_1035963_100_SI_LVK_98_SE.fq.gz_flye.fasta	DTU_2024_1035963_100_SI_LVK_98_SE.fq.gz_flye_contig_14	44521	46170	-	espL2	1-1650/1650	===============	0/0	100	99.52	vfdb	NP_289551	(espL2) Type III secretion system effector espL2 [LEE encoded T3SS (SS020)] [Escherichia coli O157:H7 str. EDL933]
DTU_2024_1035963_100_SI_LVK_98_SE.fq.gz_flye.fasta	DTU_2024_1035963_100_SI_LVK_98_SE.fq.gz_flye_contig_17	4997	5748	+	paa	1-752/759	===============	0/0	99.08	91.75	vfdb	NP_287515	(paa) outer membrane adhesin Paa [Paa (VF0194)] [Escherichia coli O157:H7 str. EDL933]
DTU_2024_1035963_100_SI_LVK_98_SE.fq.gz_flye.fasta	DTU_2024_1035963_100_SI_LVK_98_SE.fq.gz_flye_contig_22	24240	25532	-	espX5	1-1293/1293	===============	0/0	100	95.59	vfdb	NP_290699	(espX5) Type III secretion system effector EspX5 [LEE encoded T3SS (SS020)] [Escherichia coli O157:H7 str. EDL933]
DTU_2024_1035963_100_SI_LVK_98_SE.fq.gz_flye.fasta	DTU_2024_1035963_100_SI_LVK_98_SE.fq.gz_flye_contig_3	12409	13467	-	espW	1-1059/1059	===============	0/0	100	98.21	vfdb	NP_289177	(espW) Type III secretion system effector EspW [LEE encoded T3SS (SS020)] [Escherichia coli O157:H7 str. EDL933]
DTU_2024_1035963_100_SI_LVK_98_SE.fq.gz_flye.fasta	DTU_2024_1035963_100_SI_LVK_98_SE.fq.gz_flye_contig_3	14375	14963	+	espM2	1-589/591	===============	0/0	99.66	94.74	vfdb	NP_289175	(espM2) Type III secretion system effector EspM2 Rho guanine exchange factor [LEE encoded T3SS (SS020)] [Escherichia coli O157:H7 str. EDL933]
DTU_2024_1035963_100_SI_LVK_98_SE.fq.gz_flye.fasta	DTU_2024_1035963_100_SI_LVK_98_SE.fq.gz_flye_contig_3	215705	216616	+	nleH2	1-912/912	===============	0/0	100	99.67	vfdb	NP_287959	(nleH2) Type III secretion system effector NleH2 [LEE encoded T3SS (SS020)] [Escherichia coli O157:H7 str. EDL933]
DTU_2024_1035963_100_SI_LVK_98_SE.fq.gz_flye.fasta	DTU_2024_1035963_100_SI_LVK_98_SE.fq.gz_flye_contig_3	216682	217251	+	nleF	1-570/570	===============	0/0	100	99.47	vfdb	NP_287958	(nleF) Type III secretion system effector NleF caspase inhibitor [LEE encoded T3SS (SS020)] [Escherichia coli O157:H7 str. EDL933]
DTU_2024_1035963_100_SI_LVK_98_SE.fq.gz_flye.fasta	DTU_2024_1035963_100_SI_LVK_98_SE.fq.gz_flye_contig_32	105945	106691	-	entA	1-747/747	===============	0/0	100	95.85	vfdb	NP_752614	(entA) 23-dihydro-23-dihydroxybenzoate dehydrogenase [Enterobactin (VF0228)] [Escherichia coli CFT073]
DTU_2024_1035963_100_SI_LVK_98_SE.fq.gz_flye.fasta	DTU_2024_1035963_100_SI_LVK_98_SE.fq.gz_flye_contig_32	106691	107548	-	entB	1-858/858	===============	0/0	100	97.67	vfdb	NP_752613	(entB) isochorismatase [Enterobactin (VF0228)] [Escherichia coli CFT073]
DTU_2024_1035963_100_SI_LVK_98_SE.fq.gz_flye.fasta	DTU_2024_1035963_100_SI_LVK_98_SE.fq.gz_flye_contig_32	107562	109172	-	entE	1-1611/1611	===============	0/0	100	96.03	vfdb	NP_752612	(entE) 23-dihydroxybenzoate-AMP ligase component of enterobactin synthase multienzyme complex [Enterobactin (VF0228)] [Escherichia coli CFT073]
DTU_2024_1035963_100_SI_LVK_98_SE.fq.gz_flye.fasta	DTU_2024_1035963_100_SI_LVK_98_SE.fq.gz_flye_contig_32	109182	110369	-	entC	1-1188/1188	===============	0/0	100	97.56	vfdb	NP_752611	(entC) isochorismate synthase 1 [Enterobactin (VF0228)] [Escherichia coli CFT073]
DTU_2024_1035963_100_SI_LVK_98_SE.fq.gz_flye.fasta	DTU_2024_1035963_100_SI_LVK_98_SE.fq.gz_flye_contig_32	110732	111688	+	fepB	1-957/957	===============	0/0	100	96.86	vfdb	NP_752610	(fepB) ferrienterobactin ABC transporter periplasmic binding protein [Enterobactin (VF0228)] [Escherichia coli CFT073]
DTU_2024_1035963_100_SI_LVK_98_SE.fq.gz_flye.fasta	DTU_2024_1035963_100_SI_LVK_98_SE.fq.gz_flye_contig_32	111692	112942	-	entS	1-1251/1251	===============	0/0	100	95.84	vfdb	NP_752609	(entS) enterobactin exporter iron-regulated [enterobactin (IA019)] [Escherichia coli CFT073]
DTU_2024_1035963_100_SI_LVK_98_SE.fq.gz_flye.fasta	DTU_2024_1035963_100_SI_LVK_98_SE.fq.gz_flye_contig_32	113041	114057	+	fepD	1-1017/1017	===============	0/0	100	95.67	vfdb	NP_752608	(fepD) ferrienterobactin ABC transporter permease [Enterobactin (VF0228)] [Escherichia coli CFT073]
DTU_2024_1035963_100_SI_LVK_98_SE.fq.gz_flye.fasta	DTU_2024_1035963_100_SI_LVK_98_SE.fq.gz_flye_contig_32	114054	115046	+	fepG	1-993/993	===============	0/0	100	93.96	vfdb	NP_752607	(fepG) iron-enterobactin ABC transporter permease [Enterobactin (VF0228)] [Escherichia coli CFT073]
DTU_2024_1035963_100_SI_LVK_98_SE.fq.gz_flye.fasta	DTU_2024_1035963_100_SI_LVK_98_SE.fq.gz_flye_contig_32	115043	115858	+	fepC	1-816/816	===============	0/0	100	97.3	vfdb	NP_752606	(fepC) ferrienterobactin ABC transporter ATPase [Enterobactin (VF0228)] [Escherichia coli CFT073]
DTU_2024_1035963_100_SI_LVK_98_SE.fq.gz_flye.fasta	DTU_2024_1035963_100_SI_LVK_98_SE.fq.gz_flye_contig_32	117232	121085	-	entF	1-3854/3882	===============	0/0	99.28	95.64	vfdb	NP_752604	(entF) enterobactin synthase multienzyme complex component ATP-dependent [Enterobactin (VF0228)] [Escherichia coli CFT073]
DTU_2024_1035963_100_SI_LVK_98_SE.fq.gz_flye.fasta	DTU_2024_1035963_100_SI_LVK_98_SE.fq.gz_flye_contig_32	121303	122505	-	fes	1-1203/1203	===============	0/0	100	96.18	vfdb	NP_752602	(fes) enterobactin/ferric enterobactin esterase [enterobactin (IA019)] [Escherichia coli CFT073]
DTU_2024_1035963_100_SI_LVK_98_SE.fq.gz_flye.fasta	DTU_2024_1035963_100_SI_LVK_98_SE.fq.gz_flye_contig_32	122748	124988	+	fepA	1-2241/2241	===============	0/0	100	96.83	vfdb	NP_752600	(fepA) ferrienterobactin outer membrane transporter [Enterobactin (VF0228)] [Escherichia coli CFT073]
DTU_2024_1035963_100_SI_LVK_98_SE.fq.gz_flye.fasta	DTU_2024_1035963_100_SI_LVK_98_SE.fq.gz_flye_contig_32	125435	127675	-	fepA	1-2241/2241	===============	0/0	100	96.83	vfdb	NP_752600	(fepA) ferrienterobactin outer membrane transporter [Enterobactin (VF0228)] [Escherichia coli CFT073]
DTU_2024_1035963_100_SI_LVK_98_SE.fq.gz_flye.fasta	DTU_2024_1035963_100_SI_LVK_98_SE.fq.gz_flye_contig_32	127918	129120	+	fes	1-1203/1203	===============	0/0	100	96.18	vfdb	NP_752602	(fes) enterobactin/ferric enterobactin esterase [enterobactin (IA019)] [Escherichia coli CFT073]
DTU_2024_1035963_100_SI_LVK_98_SE.fq.gz_flye.fasta	DTU_2024_1035963_100_SI_LVK_98_SE.fq.gz_flye_contig_32	129338	133191	+	entF	1-3854/3882	===============	0/0	99.28	95.64	vfdb	NP_752604	(entF) enterobactin synthase multienzyme complex component ATP-dependent [Enterobactin (VF0228)] [Escherichia coli CFT073]
DTU_2024_1035963_100_SI_LVK_98_SE.fq.gz_flye.fasta	DTU_2024_1035963_100_SI_LVK_98_SE.fq.gz_flye_contig_32	134565	135380	-	fepC	1-816/816	===============	0/0	100	97.3	vfdb	NP_752606	(fepC) ferrienterobactin ABC transporter ATPase [Enterobactin (VF0228)] [Escherichia coli CFT073]
DTU_2024_1035963_100_SI_LVK_98_SE.fq.gz_flye.fasta	DTU_2024_1035963_100_SI_LVK_98_SE.fq.gz_flye_contig_32	135377	136369	-	fepG	1-993/993	===============	0/0	100	93.96	vfdb	NP_752607	(fepG) iron-enterobactin ABC transporter permease [Enterobactin (VF0228)] [Escherichia coli CFT073]
DTU_2024_1035963_100_SI_LVK_98_SE.fq.gz_flye.fasta	DTU_2024_1035963_100_SI_LVK_98_SE.fq.gz_flye_contig_32	136366	137382	-	fepD	1-1017/1017	===============	0/0	100	95.67	vfdb	NP_752608	(fepD) ferrienterobactin ABC transporter permease [Enterobactin (VF0228)] [Escherichia coli CFT073]
DTU_2024_1035963_100_SI_LVK_98_SE.fq.gz_flye.fasta	DTU_2024_1035963_100_SI_LVK_98_SE.fq.gz_flye_contig_32	137481	138731	+	entS	1-1251/1251	===============	0/0	100	95.84	vfdb	NP_752609	(entS) enterobactin exporter iron-regulated [enterobactin (IA019)] [Escherichia coli CFT073]
DTU_2024_1035963_100_SI_LVK_98_SE.fq.gz_flye.fasta	DTU_2024_1035963_100_SI_LVK_98_SE.fq.gz_flye_contig_32	138735	139691	-	fepB	1-957/957	===============	0/0	100	96.86	vfdb	NP_752610	(fepB) ferrienterobactin ABC transporter periplasmic binding protein [Enterobactin (VF0228)] [Escherichia coli CFT073]
DTU_2024_1035963_100_SI_LVK_98_SE.fq.gz_flye.fasta	DTU_2024_1035963_100_SI_LVK_98_SE.fq.gz_flye_contig_32	140054	141241	+	entC	1-1188/1188	===============	0/0	100	97.56	vfdb	NP_752611	(entC) isochorismate synthase 1 [Enterobactin (VF0228)] [Escherichia coli CFT073]
DTU_2024_1035963_100_SI_LVK_98_SE.fq.gz_flye.fasta	DTU_2024_1035963_100_SI_LVK_98_SE.fq.gz_flye_contig_32	141251	142861	+	entE	1-1611/1611	===============	0/0	100	96.03	vfdb	NP_752612	(entE) 23-dihydroxybenzoate-AMP ligase component of enterobactin synthase multienzyme complex [Enterobactin (VF0228)] [Escherichia coli CFT073]
DTU_2024_1035963_100_SI_LVK_98_SE.fq.gz_flye.fasta	DTU_2024_1035963_100_SI_LVK_98_SE.fq.gz_flye_contig_32	142875	143732	+	entB	1-858/858	===============	0/0	100	97.67	vfdb	NP_752613	(entB) isochorismatase [Enterobactin (VF0228)] [Escherichia coli CFT073]
DTU_2024_1035963_100_SI_LVK_98_SE.fq.gz_flye.fasta	DTU_2024_1035963_100_SI_LVK_98_SE.fq.gz_flye_contig_32	143732	144478	+	entA	1-747/747	===============	0/0	100	95.85	vfdb	NP_752614	(entA) 23-dihydro-23-dihydroxybenzoate dehydrogenase [Enterobactin (VF0228)] [Escherichia coli CFT073]
DTU_2024_1035963_100_SI_LVK_98_SE.fq.gz_flye.fasta	DTU_2024_1035963_100_SI_LVK_98_SE.fq.gz_flye_contig_36	3499	6573	+	hlyA	1-3075/3075	===============	0/0	100	96.91	vfdb	NP_755445	(hlyA) Hemolysin A [Hemolysin (VF0225)] [Escherichia coli CFT073]
DTU_2024_1035963_100_SI_LVK_98_SE.fq.gz_flye.fasta	DTU_2024_1035963_100_SI_LVK_98_SE.fq.gz_flye_contig_36	6645	8768	+	hlyB	1-2124/2124	===============	0/0	100	98.12	vfdb	NP_755448	(hlyB) Hemolysin B [Hemolysin (VF0225)] [Escherichia coli CFT073]
DTU_2024_1035963_100_SI_LVK_98_SE.fq.gz_flye.fasta	DTU_2024_1035963_100_SI_LVK_98_SE.fq.gz_flye_contig_36	8787	10223	+	hlyD	1-1437/1437	===============	0/0	100	96.59	vfdb	NP_755449	(hlyD) Hemolysin D [Hemolysin (VF0225)] [Escherichia coli CFT073]
DTU_2024_1035963_100_SI_LVK_98_SE.fq.gz_flye.fasta	DTU_2024_1035963_100_SI_LVK_98_SE.fq.gz_flye_contig_4	199915	201472	+	espY3	1-1572/1572	========/======	2016-03-01	99.05	94.6	vfdb	NP_286160	(espY3) Type III secretion system effector EspY3 [LEE encoded T3SS (SS020)] [Escherichia coli O157:H7 str. EDL933]
DTU_2024_1035963_100_SI_LVK_98_SE.fq.gz_flye.fasta	DTU_2024_1035963_100_SI_LVK_98_SE.fq.gz_flye_contig_4	320973	325198	-	fdeC	1-4229/4251	========/======	2025-03-01	99.41	92.67	vfdb	YP_002390132	(fdeC) adhesin FdeC [FdeC (VF0506)] [Escherichia coli O45:K1:H7 str. S88]
DTU_2024_1035963_100_SI_LVK_98_SE.fq.gz_flye.fasta	DTU_2024_1035963_100_SI_LVK_98_SE.fq.gz_flye_contig_4	328218	328808	+	ykgK/ecpR	1-591/591	===============	0/0	100	97.29	vfdb	NP_286011	(ykgK/ecpR) regulator protein EcpR [ECP (VF0404)] [Escherichia coli O157:H7 str. EDL933]
DTU_2024_1035963_100_SI_LVK_98_SE.fq.gz_flye.fasta	DTU_2024_1035963_100_SI_LVK_98_SE.fq.gz_flye_contig_4	328883	329470	+	yagZ/ecpA	1-588/588	===============	0/0	100	99.15	vfdb	NP_286010	(yagZ/ecpA) E. coli common pilus structural subunit EcpA [ECP (VF0404)] [Escherichia coli O157:H7 str. EDL933]
DTU_2024_1035963_100_SI_LVK_98_SE.fq.gz_flye.fasta	DTU_2024_1035963_100_SI_LVK_98_SE.fq.gz_flye_contig_4	329528	330196	+	yagY/ecpB	1-669/669	===============	0/0	100	98.95	vfdb	NP_286009	(yagY/ecpB) E. coli common pilus chaperone EcpB [ECP (VF0404)] [Escherichia coli O157:H7 str. EDL933]
DTU_2024_1035963_100_SI_LVK_98_SE.fq.gz_flye.fasta	DTU_2024_1035963_100_SI_LVK_98_SE.fq.gz_flye_contig_4	330222	332747	+	yagX/ecpC	1-2526/2526	===============	0/0	100	98.65	vfdb	NP_286008	(yagX/ecpC) E. coli common pilus usher EcpC [ECP (VF0404)] [Escherichia coli O157:H7 str. EDL933]
DTU_2024_1035963_100_SI_LVK_98_SE.fq.gz_flye.fasta	DTU_2024_1035963_100_SI_LVK_98_SE.fq.gz_flye_contig_4	332737	334380	+	yagW/ecpD	1-1644/1644	===============	0/0	100	98.84	vfdb	NP_286007	(yagW/ecpD) polymerized tip adhesin of ECP fibers [ECP (VF0404)] [Escherichia coli O157:H7 str. EDL933]
DTU_2024_1035963_100_SI_LVK_98_SE.fq.gz_flye.fasta	DTU_2024_1035963_100_SI_LVK_98_SE.fq.gz_flye_contig_4	334304	335057	+	yagV/ecpE	1-754/756	===============	0/0	99.74	97.22	vfdb	NP_286006	(yagV/ecpE) E. coli common pilus chaperone EcpE [ECP (VF0404)] [Escherichia coli O157:H7 str. EDL933]
DTU_2024_1035963_100_SI_LVK_98_SE.fq.gz_flye.fasta	DTU_2024_1035963_100_SI_LVK_98_SE.fq.gz_flye_contig_4	448628	450048	-	espX1	1-1422/1422	========/======	2025-01-01	99.93	95.71	vfdb	NP_285716	(espX1) Type III secretion system effector EspX1 [LEE encoded T3SS (SS020)] [Escherichia coli O157:H7 str. EDL933]
DTU_2024_1035963_100_SI_LVK_98_SE.fq.gz_flye.fasta	DTU_2024_1035963_100_SI_LVK_98_SE.fq.gz_flye_contig_5	81379	81981	+	fimB	1-603/603	===============	0/0	100	97.84	vfdb	NP_757239	(fimB) Type 1 fimbriae Regulatory protein fimB [Type 1 fimbriae (VF0221)] [Escherichia coli CFT073]
DTU_2024_1035963_100_SI_LVK_98_SE.fq.gz_flye.fasta	DTU_2024_1035963_100_SI_LVK_98_SE.fq.gz_flye_contig_5	82459	83055	+	fimE	1-597/597	===============	0/0	100	99	vfdb	NP_757240	(fimE) Type 1 fimbriae Regulatory protein fimE [Type 1 fimbriae (VF0221)] [Escherichia coli CFT073]
DTU_2024_1035963_100_SI_LVK_98_SE.fq.gz_flye.fasta	DTU_2024_1035963_100_SI_LVK_98_SE.fq.gz_flye_contig_5	83479	84084	+	fimA	1-606/606	===============	0/0	100	92.24	vfdb	NP_757241	(fimA) Type-1 fimbrial protein A chain precursor [Type 1 fimbriae (VF0221)] [Escherichia coli CFT073]
DTU_2024_1035963_100_SI_LVK_98_SE.fq.gz_flye.fasta	DTU_2024_1035963_100_SI_LVK_98_SE.fq.gz_flye_contig_5	84149	84688	+	fimI	1-540/540	===============	0/0	100	98.33	vfdb	NP_757242	(fimI) Fimbrin-like protein fimI precursor [Type 1 fimbriae (VF0221)] [Escherichia coli CFT073]
DTU_2024_1035963_100_SI_LVK_98_SE.fq.gz_flye.fasta	DTU_2024_1035963_100_SI_LVK_98_SE.fq.gz_flye_contig_5	84725	85450	+	fimC	1-726/726	===============	0/0	100	98.62	vfdb	NP_757243	(fimC) Chaperone protein fimC precursor [Type 1 fimbriae (VF0221)] [Escherichia coli CFT073]
DTU_2024_1035963_100_SI_LVK_98_SE.fq.gz_flye.fasta	DTU_2024_1035963_100_SI_LVK_98_SE.fq.gz_flye_contig_5	85517	88153	+	fimD	1-2637/2637	===============	0/0	100	98.6	vfdb	NP_757244	(fimD) Outer membrane usher protein fimD precursor [Type 1 fimbriae (VF0221)] [Escherichia coli CFT073]
DTU_2024_1035963_100_SI_LVK_98_SE.fq.gz_flye.fasta	DTU_2024_1035963_100_SI_LVK_98_SE.fq.gz_flye_contig_5	88160	88693	+	fimF	1-534/534	===============	0/0	100	97.38	vfdb	NP_757245	(fimF) FimF protein precursor [Type 1 fimbriae (VF0221)] [Escherichia coli CFT073]
DTU_2024_1035963_100_SI_LVK_98_SE.fq.gz_flye.fasta	DTU_2024_1035963_100_SI_LVK_98_SE.fq.gz_flye_contig_5	88706	89209	+	fimG	1-504/504	===============	0/0	100	97.82	vfdb	NP_757247	(fimG) FimG protein precursor [Type 1 fimbriae (VF0221)] [Escherichia coli CFT073]
DTU_2024_1035963_100_SI_LVK_98_SE.fq.gz_flye.fasta	DTU_2024_1035963_100_SI_LVK_98_SE.fq.gz_flye_contig_5	89220	90131	+	fimH	1-912/912	===============	0/0	100	97.26	vfdb	NP_757248	(fimH) FimH protein precursor [Type 1 fimbriae (VF0221)] [Escherichia coli CFT073]
DTU_2024_1035963_100_SI_LVK_98_SE.fq.gz_flye.fasta	DTU_2024_1035963_100_SI_LVK_98_SE.fq.gz_flye_contig_5	154674	156253	-	espX4	1-1581/1581	========/======	2025-03-03	99.87	92.92	vfdb	NP_290672	(espX4) Type III secretion system effector EspX4 [LEE encoded T3SS (SS020)] [Escherichia coli O157:H7 str. EDL933]
DTU_2024_1035963_100_SI_LVK_98_SE.fq.gz_flye.fasta	DTU_2024_1035963_100_SI_LVK_98_SE.fq.gz_flye_contig_5	1403809	1404639	+	gspC	1-831/831	===============	0/0	100	95.19	vfdb	YP_404599	(gspC) general secretion pathway protein C [T2SS (VF0333)] [Shigella dysenteriae Sd197]
DTU_2024_1035963_100_SI_LVK_98_SE.fq.gz_flye.fasta	DTU_2024_1035963_100_SI_LVK_98_SE.fq.gz_flye_contig_5	1404879	1406729	+	gspD	1-1836/1836	========/======	2015-01-01	100	97.35	vfdb	YP_404600	(gspD) general secretion pathway protein D [T2SS (VF0333)] [Shigella dysenteriae Sd197]
DTU_2024_1035963_100_SI_LVK_98_SE.fq.gz_flye.fasta	DTU_2024_1035963_100_SI_LVK_98_SE.fq.gz_flye_contig_5	1406729	1408222	+	gspE	1-1494/1494	===============	0/0	100	96.39	vfdb	YP_404601	(gspE) general secretion pathway protein E [T2SS (VF0333)] [Shigella dysenteriae Sd197]
DTU_2024_1035963_100_SI_LVK_98_SE.fq.gz_flye.fasta	DTU_2024_1035963_100_SI_LVK_98_SE.fq.gz_flye_contig_5	1408222	1409421	+	gspF	1-1200/1200	===============	0/0	100	97.08	vfdb	YP_404602	(gspF) general secretion pathway protein F [T2SS (VF0333)] [Shigella dysenteriae Sd197]
DTU_2024_1035963_100_SI_LVK_98_SE.fq.gz_flye.fasta	DTU_2024_1035963_100_SI_LVK_98_SE.fq.gz_flye_contig_5	1409462	1409917	+	gspG	1-456/456	===============	0/0	100	98.03	vfdb	YP_404603	(gspG) general secretion pathway protein G [T2SS (VF0333)] [Shigella dysenteriae Sd197]
DTU_2024_1035963_100_SI_LVK_98_SE.fq.gz_flye.fasta	DTU_2024_1035963_100_SI_LVK_98_SE.fq.gz_flye_contig_5	1409954	1410484	+	gspH	1-531/531	===============	0/0	100	96.05	vfdb	YP_404604	(gspH) general secretion pathway protein H [T2SS (VF0333)] [Shigella dysenteriae Sd197]
DTU_2024_1035963_100_SI_LVK_98_SE.fq.gz_flye.fasta	DTU_2024_1035963_100_SI_LVK_98_SE.fq.gz_flye_contig_5	1410481	1410852	+	gspI	1-372/372	===============	0/0	100	95.16	vfdb	YP_404605	(gspI) general secretion pathway protein I [T2SS (VF0333)] [Shigella dysenteriae Sd197]
DTU_2024_1035963_100_SI_LVK_98_SE.fq.gz_flye.fasta	DTU_2024_1035963_100_SI_LVK_98_SE.fq.gz_flye_contig_5	1410885	1411454	+	gspJ	1-570/570	===============	0/0	100	96.67	vfdb	YP_404606	(gspJ) general secretion pathway protein J [T2SS (VF0333)] [Shigella dysenteriae Sd197]
DTU_2024_1035963_100_SI_LVK_98_SE.fq.gz_flye.fasta	DTU_2024_1035963_100_SI_LVK_98_SE.fq.gz_flye_contig_5	1411451	1412428	+	gspK	1-978/978	===============	0/0	100	97.75	vfdb	YP_404607	(gspK) general secretion pathway protein K [T2SS (VF0333)] [Shigella dysenteriae Sd197]
DTU_2024_1035963_100_SI_LVK_98_SE.fq.gz_flye.fasta	DTU_2024_1035963_100_SI_LVK_98_SE.fq.gz_flye_contig_5	1412743	1413603	+	gspL	1-861/861	===============	0/0	100	96.05	vfdb	YP_404608	(gspL) general secretion pathway protein L [T2SS (VF0333)] [Shigella dysenteriae Sd197]
DTU_2024_1035963_100_SI_LVK_98_SE.fq.gz_flye.fasta	DTU_2024_1035963_100_SI_LVK_98_SE.fq.gz_flye_contig_5	1413719	1414141	+	gspM	1-423/423	===============	0/0	100	94.56	vfdb	YP_404609	(gspM) general secretion pathway protein M [T2SS (VF0333)] [Shigella dysenteriae Sd197]
DTU_2024_1035964_100_SI_LVK_102_SE.fq.gz_flye.fasta	DTU_2024_1035964_100_SI_LVK_102_SE.fq.gz_flye_contig_14	350586	351008	-	gspM	1-423/423	===============	0/0	100	98.34	vfdb	YP_404609	(gspM) general secretion pathway protein M [T2SS (VF0333)] [Shigella dysenteriae Sd197]
DTU_2024_1035964_100_SI_LVK_102_SE.fq.gz_flye.fasta	DTU_2024_1035964_100_SI_LVK_102_SE.fq.gz_flye_contig_14	351124	351984	-	gspL	1-861/861	===============	0/0	100	97.1	vfdb	YP_404608	(gspL) general secretion pathway protein L [T2SS (VF0333)] [Shigella dysenteriae Sd197]
DTU_2024_1035964_100_SI_LVK_102_SE.fq.gz_flye.fasta	DTU_2024_1035964_100_SI_LVK_102_SE.fq.gz_flye_contig_14	352299	353276	-	gspK	1-978/978	===============	0/0	100	97.03	vfdb	YP_404607	(gspK) general secretion pathway protein K [T2SS (VF0333)] [Shigella dysenteriae Sd197]
DTU_2024_1035964_100_SI_LVK_102_SE.fq.gz_flye.fasta	DTU_2024_1035964_100_SI_LVK_102_SE.fq.gz_flye_contig_14	353273	353842	-	gspJ	1-570/570	===============	0/0	100	96.67	vfdb	YP_404606	(gspJ) general secretion pathway protein J [T2SS (VF0333)] [Shigella dysenteriae Sd197]
DTU_2024_1035964_100_SI_LVK_102_SE.fq.gz_flye.fasta	DTU_2024_1035964_100_SI_LVK_102_SE.fq.gz_flye_contig_14	353875	354246	-	gspI	1-372/372	===============	0/0	100	95.16	vfdb	YP_404605	(gspI) general secretion pathway protein I [T2SS (VF0333)] [Shigella dysenteriae Sd197]
DTU_2024_1035964_100_SI_LVK_102_SE.fq.gz_flye.fasta	DTU_2024_1035964_100_SI_LVK_102_SE.fq.gz_flye_contig_14	354243	354773	-	gspH	1-531/531	===============	0/0	100	95.48	vfdb	YP_404604	(gspH) general secretion pathway protein H [T2SS (VF0333)] [Shigella dysenteriae Sd197]
DTU_2024_1035964_100_SI_LVK_102_SE.fq.gz_flye.fasta	DTU_2024_1035964_100_SI_LVK_102_SE.fq.gz_flye_contig_14	354810	355265	-	gspG	1-456/456	===============	0/0	100	94.96	vfdb	YP_404603	(gspG) general secretion pathway protein G [T2SS (VF0333)] [Shigella dysenteriae Sd197]
DTU_2024_1035964_100_SI_LVK_102_SE.fq.gz_flye.fasta	DTU_2024_1035964_100_SI_LVK_102_SE.fq.gz_flye_contig_14	355306	356505	-	gspF	1-1200/1200	===============	0/0	100	96	vfdb	YP_404602	(gspF) general secretion pathway protein F [T2SS (VF0333)] [Shigella dysenteriae Sd197]
DTU_2024_1035964_100_SI_LVK_102_SE.fq.gz_flye.fasta	DTU_2024_1035964_100_SI_LVK_102_SE.fq.gz_flye_contig_15	191459	193358	+	espL1	1-1899/1899	========/======	2025-01-01	100	97.58	vfdb	NP_288154	(espL1) Type III secretion system effector espL1 [LEE encoded T3SS (SS020)] [Escherichia coli O157:H7 str. EDL933]
DTU_2024_1035964_100_SI_LVK_102_SE.fq.gz_flye.fasta	DTU_2024_1035964_100_SI_LVK_102_SE.fq.gz_flye_contig_19	158373	159154	-	espY1	1-753/753	========/======	1931-03-01	99.87	90.42	vfdb	NP_285753	(espY1) Type III secretion system effector EspY1 [LEE encoded T3SS (SS020)] [Escherichia coli O157:H7 str. EDL933]
DTU_2024_1035964_100_SI_LVK_102_SE.fq.gz_flye.fasta	DTU_2024_1035964_100_SI_LVK_102_SE.fq.gz_flye_contig_19	197422	198843	+	espX1	1-1422/1422	========/======	2025-02-02	99.93	95.29	vfdb	NP_285716	(espX1) Type III secretion system effector EspX1 [LEE encoded T3SS (SS020)] [Escherichia coli O157:H7 str. EDL933]
DTU_2024_1035964_100_SI_LVK_102_SE.fq.gz_flye.fasta	DTU_2024_1035964_100_SI_LVK_102_SE.fq.gz_flye_contig_2	822068	823496	-	aslA	1-1428/1428	========/======	2025-01-01	100	92.86	vfdb	AAG10151	(aslA) putative arylsulfatase [AslA (VF0238)] [Escherichia coli O18:K1:H7 str. RS218]
DTU_2024_1035964_100_SI_LVK_102_SE.fq.gz_flye.fasta	DTU_2024_1035964_100_SI_LVK_102_SE.fq.gz_flye_contig_2	1058783	1060969	-	espL4	1-2187/2187	===============	0/0	100	97.3	vfdb	NP_290644	(espL4) Type III secretion system effector EspL4 [LEE encoded T3SS (SS020)] [Escherichia coli O157:H7 str. EDL933]
DTU_2024_1035964_100_SI_LVK_102_SE.fq.gz_flye.fasta	DTU_2024_1035964_100_SI_LVK_102_SE.fq.gz_flye_contig_2	1089185	1090765	+	espX4	1-1581/1581	===============	0/0	100	96.39	vfdb	NP_290672	(espX4) Type III secretion system effector EspX4 [LEE encoded T3SS (SS020)] [Escherichia coli O157:H7 str. EDL933]
DTU_2024_1035964_100_SI_LVK_102_SE.fq.gz_flye.fasta	DTU_2024_1035964_100_SI_LVK_102_SE.fq.gz_flye_contig_2	1120265	1121557	-	espX5	1-1293/1293	===============	0/0	100	96.6	vfdb	NP_290699	(espX5) Type III secretion system effector EspX5 [LEE encoded T3SS (SS020)] [Escherichia coli O157:H7 str. EDL933]
DTU_2024_1035964_100_SI_LVK_102_SE.fq.gz_flye.fasta	DTU_2024_1035964_100_SI_LVK_102_SE.fq.gz_flye_contig_2	1349514	1350116	+	fimB	1-603/603	===============	0/0	100	97.84	vfdb	NP_757239	(fimB) Type 1 fimbriae Regulatory protein fimB [Type 1 fimbriae (VF0221)] [Escherichia coli CFT073]
DTU_2024_1035964_100_SI_LVK_102_SE.fq.gz_flye.fasta	DTU_2024_1035964_100_SI_LVK_102_SE.fq.gz_flye_contig_2	1350594	1351190	+	fimE	1-597/597	===============	0/0	100	99	vfdb	NP_757240	(fimE) Type 1 fimbriae Regulatory protein fimE [Type 1 fimbriae (VF0221)] [Escherichia coli CFT073]
DTU_2024_1035964_100_SI_LVK_102_SE.fq.gz_flye.fasta	DTU_2024_1035964_100_SI_LVK_102_SE.fq.gz_flye_contig_2	1351614	1352219	+	fimA	1-606/606	===============	0/0	100	90.1	vfdb	NP_757241	(fimA) Type-1 fimbrial protein A chain precursor [Type 1 fimbriae (VF0221)] [Escherichia coli CFT073]
DTU_2024_1035964_100_SI_LVK_102_SE.fq.gz_flye.fasta	DTU_2024_1035964_100_SI_LVK_102_SE.fq.gz_flye_contig_2	1352284	1352822	+	fimI	1-540/540	========/======	2025-01-01	99.81	98.7	vfdb	NP_757242	(fimI) Fimbrin-like protein fimI precursor [Type 1 fimbriae (VF0221)] [Escherichia coli CFT073]
DTU_2024_1035964_100_SI_LVK_102_SE.fq.gz_flye.fasta	DTU_2024_1035964_100_SI_LVK_102_SE.fq.gz_flye_contig_2	1352859	1353584	+	fimC	1-726/726	===============	0/0	100	98.35	vfdb	NP_757243	(fimC) Chaperone protein fimC precursor [Type 1 fimbriae (VF0221)] [Escherichia coli CFT073]
DTU_2024_1035964_100_SI_LVK_102_SE.fq.gz_flye.fasta	DTU_2024_1035964_100_SI_LVK_102_SE.fq.gz_flye_contig_2	1353651	1356287	+	fimD	1-2637/2637	===============	0/0	100	98.52	vfdb	NP_757244	(fimD) Outer membrane usher protein fimD precursor [Type 1 fimbriae (VF0221)] [Escherichia coli CFT073]
DTU_2024_1035964_100_SI_LVK_102_SE.fq.gz_flye.fasta	DTU_2024_1035964_100_SI_LVK_102_SE.fq.gz_flye_contig_2	1356294	1356827	+	fimF	1-534/534	===============	0/0	100	97.38	vfdb	NP_757245	(fimF) FimF protein precursor [Type 1 fimbriae (VF0221)] [Escherichia coli CFT073]
DTU_2024_1035964_100_SI_LVK_102_SE.fq.gz_flye.fasta	DTU_2024_1035964_100_SI_LVK_102_SE.fq.gz_flye_contig_2	1356840	1357343	+	fimG	1-504/504	===============	0/0	100	98.21	vfdb	NP_757247	(fimG) FimG protein precursor [Type 1 fimbriae (VF0221)] [Escherichia coli CFT073]
DTU_2024_1035964_100_SI_LVK_102_SE.fq.gz_flye.fasta	DTU_2024_1035964_100_SI_LVK_102_SE.fq.gz_flye_contig_2	1357354	1358265	+	fimH	1-912/912	===============	0/0	100	97.37	vfdb	NP_757248	(fimH) FimH protein precursor [Type 1 fimbriae (VF0221)] [Escherichia coli CFT073]
DTU_2024_1035964_100_SI_LVK_102_SE.fq.gz_flye.fasta	DTU_2024_1035964_100_SI_LVK_102_SE.fq.gz_flye_contig_23	45134	45904	-	entD	1-771/771	===============	0/0	100	95.07	vfdb	NP_752599	(entD) phosphopantetheinyl transferase component of enterobactin synthase multienzyme complex [Enterobactin (VF0228)] [Escherichia coli CFT073]
DTU_2024_1035964_100_SI_LVK_102_SE.fq.gz_flye.fasta	DTU_2024_1035964_100_SI_LVK_102_SE.fq.gz_flye_contig_23	45929	48169	-	fepA	1-2241/2241	===============	0/0	100	96.74	vfdb	NP_752600	(fepA) ferrienterobactin outer membrane transporter [Enterobactin (VF0228)] [Escherichia coli CFT073]
DTU_2024_1035964_100_SI_LVK_102_SE.fq.gz_flye.fasta	DTU_2024_1035964_100_SI_LVK_102_SE.fq.gz_flye_contig_23	48412	49614	+	fes	1-1203/1203	===============	0/0	100	96.67	vfdb	NP_752602	(fes) enterobactin/ferric enterobactin esterase [enterobactin (IA019)] [Escherichia coli CFT073]
DTU_2024_1035964_100_SI_LVK_102_SE.fq.gz_flye.fasta	DTU_2024_1035964_100_SI_LVK_102_SE.fq.gz_flye_contig_23	49832	53685	+	entF	1-3854/3882	===============	0/0	99.28	95.67	vfdb	NP_752604	(entF) enterobactin synthase multienzyme complex component ATP-dependent [Enterobactin (VF0228)] [Escherichia coli CFT073]
DTU_2024_1035964_100_SI_LVK_102_SE.fq.gz_flye.fasta	DTU_2024_1035964_100_SI_LVK_102_SE.fq.gz_flye_contig_23	55059	55874	-	fepC	1-816/816	===============	0/0	100	97.3	vfdb	NP_752606	(fepC) ferrienterobactin ABC transporter ATPase [Enterobactin (VF0228)] [Escherichia coli CFT073]
DTU_2024_1035964_100_SI_LVK_102_SE.fq.gz_flye.fasta	DTU_2024_1035964_100_SI_LVK_102_SE.fq.gz_flye_contig_23	55871	56863	-	fepG	1-993/993	===============	0/0	100	94.06	vfdb	NP_752607	(fepG) iron-enterobactin ABC transporter permease [Enterobactin (VF0228)] [Escherichia coli CFT073]
[truncated: 1,545 more rows]
