# Supplementary material for: Metagenomics provides broad detection of pathogens, antimicrobial resistance, and virulence genes in pig diarrhoea and complement conventional methods
Source: Research Square preprint supplement (doi:10.21203/rs.3.rs-8285969/v1), 2025-12-19
Supplement: Supplementary file 7 [file c38af786bd9e662624b20bcd.xlsx]

## Sheet: P2 Solo
						Estimated bases	Passed bases (Q score > 9)
Corresponding sample IDs	FC1_04102024	N50 = 6.54 kb
		Total bp, Mb	Passed bp, %	Passed bp, Mbp	Passed base-pairs, bp	141.15 Gb	106.74 Gb
DTU_2024_1036880_100_MG_LVK_11_SE.fq.gz	Barcode01	40315.4	87	35074.4	3.50744e+12
DTU_2024_1036881_100_MG_LVK_17_SE.fq.gz	Barcode02	31824.2	86	27368.8	2736882920000
DTU_2024_1036882_100_MG_LVK_42_SE.fq.gz	Barcode03	26596	85.4	22712.9	2271294130000
DTU_2024_1036883_100_MG_LVK_43_SE.fq.gz	Barcode04	20334.7	86.1	17508.2	1.75082e+12
					0
	FC2_04102024	N50 = 6.04 kb			0	106.74 Gb	87.49 Gb
					0
DTU_2024_1036884_100_MG_LVK_48_SE.fq.gz	Barcode05	15926.4	87.1	13871.9	1387185085000
DTU_2024_1036885_100_MG_LVK_52_SE.fq.gz	Barcode06	26082.2	88.6	23108.9	2310887350000
DTU_2024_1036886_100_MG_LVK_56_SE.fq.gz	Barcode07	26311.8	87.6	23049.2	2.30492e+12
DTU_2024_1036887_100_MG_LVK_60_SE.fq.gz	Barcode08	25954.5	88.9	23073.6	2307355050000
					0
	FC3_15102024	N50 = 5.76 kb			0	135.47 Gb	110.01 Gb
					0
DTU_2024_1036888_100_MG_LVK_61_SE.fq.gz	Barcode09	35368.7	88.4	31265.9	3126588660000
DTU_2024_1036889_100_MG_LVK_74_SE.fq.gz	Barcode10	25903.4	87.8	22743.2	2.27432e+12
DTU_2024_1036890_100_MG_LVK_76_SE.fq.gz	Barcode11	31242	87.2	27243	2724298912000
DTU_2024_1036891_100_MG_LVK_79_SE.fq.gz	Barcode12	28466.3	88.3	25135.8	2.51358e+12
					0
	FC4_15102024	N50 = 3.01 kb			0	119.24 Gb	99.36 Gb
					0
DTU_2024_1036892_100_MG_LVK_80_SE.fq.gz	Barcode13	21157	90.8	19210.6	1921059232000
DTU_2024_1036893_100_MG_LVK_82_SE.fq.gz	Barcode14	25474.1	90.6	23079.5	2307952554000
DTU_2024_1036894_100_MG_LVK_83_SE.fq.gz	Barcode15	23106.4	89.3	20634	2.0634e+12
DTU_2024_1036895_100_MG_LVK_88_SE.fq.gz	Barcode16	35422.4	91.2	32305.2	3.23052e+12
					0
	FC5_28102024	N50 = 3.38 kb			0	65.76 Gb	51.54 Gb
					0
DTU_2024_1036896_100_MG_LVK_94_SE.fq.gz	Barcode17	17313.7	88.2	15270.7	1527069222000
DTU_2024_1036897_100_MG_LVK_97_SE.fq.gz	Barcode18	7640.33	86.9	6639.45	663944677000
DTU_2024_1036898_100_MG_LVK_98_SE.fq.gz	Barcode19	11966.9	87.1	10423.2	1.04232e+12
DTU_2024_1036899_100_MG_LVK_101_SE.fq.gz	Barcode20	18338.1	90	16504.3	1.65043e+12
	FC6_28102024	N50 = 2.62 kb				93.81 Gb	73.41 Gb
DTU_2024_1036900_100_MG_LVK_102_SE.fq.gz	Barcode21	19507.7	86.6	16893.7	1.68937e+12
DTU_2024_1036901_100_MG_LVK_103_SE.fq.gz	Barcode22	20564.6	86.8	17850.1	1785006412000
DTU_2024_1036902_100_MG_ID_262_W_F146_6_SE.fq.gz	Barcode23	18929.3	88	16657.8	1665778400000
DTU_2024_1036903_100_MG_ID_262_W_F146_11_SE.fq.g	Barcode24	19718.5	86.2	16997.4	1.69974e+12
	FC7_04112024	N50 = 4.32 kb				161.29 Gb	150.97 Gb
DTU_2024_1036904_100_MG_ID_1188_W_F139_2_SE.fq.gz	Barcode01	30719.3	95.8	29429.1	2942913730000
DTU_2024_1036905_100_MG_ID_1188_W_F139_10_SE.fq.gz	Barcode02	42095.9	96.1	40454.2	4045416951000
DTU_2024_1036906_100_MG_ID_3066_W_F150_12_SE.fq.gz	Barcode03	28479.7	96.1	27369	2.7369e+12
DTU_2024_1036907_100_MG_ID_3066_W_F150_21_SE.fq.gz	Barcode04	49428.9	96	47451.8	4.74518e+12
	LVK_culture_negative_MG_260325 (combined 72h + 48h)					63.52 Gb	52.08 Gb
DTU_2025_1037643_100_MG_LVK_8_SE.fq.gz	Barcode15	788.96	96.3	7677.33	7.67733e+11
DTU_2025_1037644_100_MG_LVK_18_SE.fq.gz	Barcode16	765.54	96.6	7624.34	7.62434e+11
DTU_2025_1037645_100_MG_LVK_73_SE.fq.gz	Barcode17	1035.41	95.9	10093	1.0093e+12
DTU_2025_1037646_100_MG_LVK_107_SE.fq.gz	Barcode18	582.16	96.2	5692.47	569247056000

## Sheet: Grid4
barcode IDs	Corresponding sample IDs	Total bp, Mb	Passed bp, %	Passed bp, Mbp	Passed base-pairs, bp	N50, kb
barcode01	DTU_2025_1036880_101_MG_LVK_11_SE.fq.gz	1481.07	93.1	1378.88	137887617000	3.79
barcode02	DTU_2025_1036884_101_MG_LVK_48_SE.fq.gz	1428.82	94.2	1345.95	1.34595e+11
barcode03	DTU_2025_1036887_101_MG_LVK_60_SE.fq.gz	903.22	93.8	847.22	8.4722e+10
barcode04	DTU_2025_1036894_101_MG_LVK_83_SE.fq.gz	650.41	88.4	574.962	57496244000

## Sheet: Grid23
barcode IDs	Corresponding sample IDs	Total bp, Mb	Passed bp, %	Passed bp, Mbp	Passed base-pairs, bp	N50, kb
barcode01		355.23	92.7	329.298	3.29298e+10	4.38
barcode02		167.41	89.1	149.162	14916231000
barcode03		164.35	85.9	141.177	14117665000
barcode04		206.98	89.2	184.626	1.84626e+10
barcode05		168.15	91.4	153.689	1.53689e+10
barcode06		193.64	89.9	174.082	17408236000
barcode07		698.44	91.1	636.279	6.36279e+10
barcode08		201.63	94.1	189.734	18973383000
barcode09		289.6	91.5	264.984	2.64984e+10
barcode10		168.2	89.1	149.866	1.49866e+10
barcode11		189.15	89.8	169.857	1.69857e+10
barcode12		95.22	90.4	86.0789	8.60789e+09
barcode13		122.6	84.8	103.965	10396480000
barcode14		153.77	88.3	135.779	13577891000
barcode15		153.16	88.8	136.006	13600608000
barcode16		127.35	91.5	116.525	11652525000
barcode17		150.61	84.7	127.567	1.27567e+10
barcode18		129.92	87.9	114.2	1.142e+10
barcode19		125.88	87.4	110.019	11001912000
barcode20		199.68	92.3	184.305	18430464000
barcode21		223.31	89.4	199.639	19963914000
barcode22		158.99	81.5	129.577	12957685000
barcode23		170.48	89.4	152.409	15240912000

## Sheet: P2_Grid4
Sample ID	PromethION P2 Solo	GridION_4	GridION_23
MG_LVK_11	3507.44	137.888	32.9298
MG_LVK_48	1387.19	134.595	15.3689
MG_LVK_60	2307.36	84.722	18.9734
MG_LVK_83	2063.4	57.4962	13.6006

## Sheet: P2_Grid23
Sample ID	PromethION P2 Solo	GridION-23
MG_LVK_11	3507.44	32.9298
MG_LVK_17	2736.88	14.9162
MG_LVK_42	2271.29	14.1177
MG_LVK_43	1750.82	18.4626
MG_LVK_48	1387.19	15.3689
MG_LVK_52	2310.89	17.4082
MG_LVK_60	2307.36	63.6279
MG_LVK_61	3126.59	18.9734
MG_LVK_74	2274.32	26.4984
MG_LVK_76	2724.3	14.9866
MG_LVK_79	2513.58	16.9857
MG_LVK_80	1921.06	8.60789
MG_LVK_82	2307.95	10.3965
MG_LVK_83	2063.4	13.5779
MG_LVK_88	3230.52	13.6006
MG_LVK_94	1527.07	11.6525
MG_LVK_97	663.945	12.7567
MG_LVK_98	1042.32	11.42
MG_LVK_101	1650.43	11.0019
MG_LVK_102	1689.37	18.4305
MG_LVK_103	1785.01	19.9639
MG_LVK_18	762.434	12.9577
MG_LVK_73	1009.3	15.2409
