# Supplementary material for: Metagenomics provides broad detection of pathogens, antimicrobial resistance, and virulence genes in pig diarrhoea and complement conventional methods
Source: Research Square preprint supplement (doi:10.21203/rs.3.rs-8285969/v1), 2025-12-19
Supplement: Supplementary file 8 [file d997e8ee6656b9d4d1986f1c.xlsx]

## Sheet: Table_S8_genomic
	S.obs	S.chao1	S.ACE	data_shannon	data_simpson	data_evenness
DTU_2024_1036880_100_MG_LVK_11_SE	7070	7671.21	7576.52	4.74946	0.936063	0.535838
DTU_2024_1036881_100_MG_LVK_17_SE	8469	8945.76	8915.05	4.50425	0.912322	0.498028
DTU_2024_1036882_100_MG_LVK_42_SE	6044	6631.72	6546.4	4.31177	0.878435	0.495217
DTU_2024_1036883_100_MG_LVK_43_SE	7599	8240.17	8130.24	5.46409	0.966284	0.611485
DTU_2024_1036884_100_MG_LVK_48_SE	4540	5219	5075.51	5.12919	0.956622	0.609118
DTU_2024_1036885_100_MG_LVK_52_SE	6859	7632.59	7476.15	4.42943	0.875187	0.501446
DTU_2024_1036886_100_MG_LVK_56_SE	8940	9656.66	9532.03	5.38352	0.949218	0.591707
DTU_2024_1036887_100_MG_LVK_60_SE	5178	5727.9	5658.17	4.06189	0.88196	0.474954
DTU_2024_1036888_100_MG_LVK_61_SE	5408	5827.58	5749.04	3.37946	0.786169	0.39316
DTU_2024_1036889_100_MG_LVK_74_SE	8355	8938.38	8832.91	5.1451	0.935178	0.56974
DTU_2024_1036890_100_MG_LVK_76_SE	7096	7511.21	7457.06	4.82547	0.928353	0.544188
DTU_2024_1036891_100_MG_LVK_79_SE	10268	11679.8	11487.9	5.37104	0.956849	0.581484
DTU_2024_1036892_100_MG_LVK_80_SE	8461	9096.39	9034.51	3.27678	0.735222	0.362347
DTU_2024_1036893_100_MG_LVK_82_SE	7469	8004.88	7970.48	4.65244	0.91289	0.521661
DTU_2024_1036894_100_MG_LVK_83_SE	7756	8730.53	8611.98	4.40271	0.876623	0.491582
DTU_2024_1036895_100_MG_LVK_88_SE	6311	6693.91	6654.88	3.24553	0.755668	0.370915
DTU_2024_1036896_100_MG_LVK_94_SE	8952	9875.27	9754.87	5.37361	0.939813	0.590531
DTU_2024_1036897_100_MG_LVK_97_SE	8130	8985.02	8910.51	5.21169	0.965978	0.578863
DTU_2024_1036898_100_MG_LVK_98_SE	8319	9069.55	8995.98	4.68846	0.89692	0.519423
DTU_2024_1036899_100_MG_LVK_101_SE	11415	12775.8	12560.8	4.85011	0.913547	0.519135
DTU_2024_1036900_100_MG_LVK_102_SE	8024	8449.14	8392.89	4.14495	0.869526	0.461053
DTU_2024_1036901_100_MG_LVK_103_SE	7783	8287.14	8203.65	3.88682	0.851094	0.433811
Control_DTU_2024_1036902_100_MG_ID_262_W_F146_6_SE	4576	5107.28	4982.82	5.62651	0.973863	0.667552
Control_DTU_2024_1036903_100_MG_ID_262_W_F146_11_SE	4451	5022.05	4896.32	5.24483	0.956699	0.624319
Control_DTU_2024_1036904_100_MG_ID_1188_W_F139_2_SE	4535	4865	4806.92	4.67719	0.934682	0.555513
Control_DTU_2024_1036905_100_MG_ID_1188_W_F139_10_SE	4881	5202.38	5153.19	5.68973	0.981462	0.669923
Control_DTU_2024_1036906_100_MG_ID_3066_W_F150_12_SE	4219	4511.06	4451.52	4.78371	0.949512	0.573081
Control_DTU_2024_1036907_100_MG_ID_3066_W_F150_21_SE	4108	4213.85	4208.03	4.30449	0.925501	0.517324
DTU_2025_1037643_100_MG_LVK_8	6297	7335.37	7245.1	4.29796	0.864656	0.491318
DTU_2025_1037644_100_MG_LVK_18	6757	7654.14	7602.94	5.29111	0.957961	0.600013
DTU_2025_1037645_100_MG_LVK_73	6263	7215.97	7116.81	4.09341	0.821793	0.468224
DTU_2025_1037646_100_MG_LVK_107	6707	8254.17	8230.18	5.31965	0.965572	0.603758

## Sheet: Table_S8_resfinder
	S.obs	S.chao1	S.ACE	data_shannon	data_simpson	data_evenness
MG_P2_LVK_11_SE	185	208.882	209.275	3.21016	0.906134	0.614932
MG_P2_LVK_17_SE	160	189.25	185.445	3.14645	0.925726	0.61997
MG_P2_LVK_42_SE	104	116.667	121.925	3.11474	0.930535	0.670645
MG_P2_LVK_43_SE	153	184.5	179.104	3.45259	0.951199	0.686339
MG_P2_LVK_48_SE	128	141.571	145.857	3.22293	0.930842	0.664243
MG_P2_LVK_52_SE	201	219.6	225.176	3.42986	0.900619	0.646739
MG_P2_LVK_56_SE	162	199.4	196.485	3.35451	0.905971	0.659351
MG_P2_LVK_60_SE	127	148.667	153.994	2.48994	0.805174	0.514006
MG_P2_LVK_61_SE	101	132.625	124.804	1.92836	0.719693	0.417835
MG_P2_LVK_74_SE	121	127.5	128.009	2.70502	0.852758	0.56404
MG_P2_LVK_76_SE	184	212.636	228.454	3.18704	0.88887	0.611137
MG_P2_LVK_79_SE	151	169.4	173.178	3.38931	0.929454	0.675527
MG_P2_LVK_80_SE	172	203.231	194.459	2.10268	0.684371	0.408487
MG_P2_LVK_82_SE	161	192.071	188.674	3.12983	0.911762	0.615939
MG_P2_LVK_83_SE	150	160.5	169.464	3.03811	0.907	0.606333
MG_P2_LVK_88_SE	132	145.6	142.96	2.87327	0.884153	0.588447
MG_P2_LVK_94_SE	152	159.773	166.041	3.48887	0.932172	0.694456
MG_P2_LVK_97_SE	134	145	150.492	3.21364	0.908934	0.656133
MG_P2_LVK_98_SE	180	207.067	200.949	3.82785	0.953797	0.737123
MG_P2_LVK_101_SE	144	225.2	167.121	3.25842	0.927928	0.655643
MG_P2_LVK_102_SE	130	153	150.59	2.59354	0.860804	0.532824
MG_P2_LVK_103_SE	176	197	200.085	3.52014	0.923161	0.680815
MG_P2_LVK_8	128	178.143	152.055	3.35027	0.922973	0.690488
MG_P2_LVK_18	93	106.571	117.007	3.1547	0.929958	0.696002
MG_P2_LVK_73	112	137.091	131.257	2.52428	0.771804	0.534975
MG_P2_LVK_107	123	144.429	146.234	3.60991	0.952751	0.750161
Control_MG_P2_ID_262_W_F146_6_SE	62	69.5	69.7476	2.79592	0.908362	0.677449
Control_MG_P2_ID_262_W_F146_11_SE	68	108	85.2963	2.75436	0.906508	0.652768
Control_MG_P2_ID_1188_W_F139_2_SE	72	85	88.3276	2.54497	0.854166	0.595083
Control_MG_P2_ID_1188_W_F139_10_SE	80	110.6	103.905	2.77946	0.898358	0.634287
Control_MG_P2_ID_3066_W_F150_12_S	67	85.2	84.2931	2.72821	0.908082	0.648848
Control_MG_P2_ID_3066_W_F150_21_SE	71	78.8571	83.4117	2.60036	0.889556	0.610029

## Sheet: Table_S9A_family_aldex
family_name	DTU_2024_1036880_100_MG_LVK_11_SE.mapstat	DTU_2024_1036881_100_MG_LVK_17_SE.mapstat	DTU_2024_1036882_100_MG_LVK_42_SE.mapstat	DTU_2024_1036883_100_MG_LVK_43_SE.mapstat	DTU_2024_1036884_100_MG_LVK_48_SE.mapstat	DTU_2024_1036885_100_MG_LVK_52_SE.mapstat	DTU_2024_1036886_100_MG_LVK_56_SE.mapstat	DTU_2024_1036887_100_MG_LVK_60_SE.mapstat	DTU_2024_1036888_100_MG_LVK_61_SE.mapstat	DTU_2024_1036889_100_MG_LVK_74_SE.mapstat	DTU_2024_1036890_100_MG_LVK_76_SE.mapstat	DTU_2024_1036891_100_MG_LVK_79_SE.mapstat	DTU_2024_1036892_100_MG_LVK_80_SE.mapstat	DTU_2024_1036893_100_MG_LVK_82_SE.mapstat	DTU_2024_1036894_100_MG_LVK_83_SE.mapstat	DTU_2024_1036895_100_MG_LVK_88_SE.mapstat	DTU_2024_1036896_100_MG_LVK_94_SE.mapstat	DTU_2024_1036897_100_MG_LVK_97_SE.mapstat	DTU_2024_1036898_100_MG_LVK_98_SE.mapstat	DTU_2024_1036899_100_MG_LVK_101_SE.mapstat	DTU_2024_1036900_100_MG_LVK_102_SE.mapstat	DTU_2024_1036901_100_MG_LVK_103_SE.mapstat	NC_DTU_2024_1036902_100_MG_ID_262_W_F146_6_SE.mapstat	NC_DTU_2024_1036903_100_MG_ID_262_W_F146_11_SE.mapstat	NC_DTU_2024_1036904_100_MG_ID_1188_W_F139_2_SE.mapstat	NC_DTU_2024_1036905_100_MG_ID_1188_W_F139_10_SE.mapstat	NC_DTU_2024_1036906_100_MG_ID_3066_W_F150_12_SE.mapstat	NC_DTU_2024_1036907_100_MG_ID_3066_W_F150_21_SE.mapstat	DTU_2025_1036880_101_MG_LVK_11.mapstat	DTU_2025_1036880_102_MG_LVK_11.mapstat	DTU_2025_1036881_101_MG_LVK_17.mapstat	DTU_2025_1036882_101_MG_LVK_42.mapstat	DTU_2025_1036883_101_MG_LVK_43.mapstat	DTU_2025_1036884_101_MG_LVK_48.mapstat	DTU_2025_1036884_102_MG_LVK_48.mapstat	DTU_2025_1036885_101_MG_LVK_52.mapstat	DTU_2025_1036887_101_MG_LVK_60.mapstat	DTU_2025_1036887_102_MG_LVK_60.mapstat	DTU_2025_1036888_101_MG_LVK_61.mapstat	DTU_2025_1036889_101_MG_LVK_74.mapstat	DTU_2025_1036890_101_MG_LVK_76.mapstat	DTU_2025_1036891_101_MG_LVK_79.mapstat	DTU_2025_1036892_101_MG_LVK_80.mapstat	DTU_2025_1036893_101_MG_LVK_82.mapstat	DTU_2025_1036894_101_MG_LVK_83.mapstat	DTU_2025_1036894_102_MG_LVK_83.mapstat	DTU_2025_1036895_101_MG_LVK_88.mapstat	DTU_2025_1036896_101_MG_LVK_94.mapstat	DTU_2025_1036897_101_MG_LVK_97.mapstat
Porphyromonadaceae	0.158383	0.0908065	0.305316	0.104656	0.326579	0.0413913	0.121066	0.132409	0.110922	0.129665	0.140675	0.0674786	0.160114	0.244782	0.212478	0.0347842	0.0831259	0.230171	0.214752	0.116673	0.0871752	0.116133	0.369707	0.252445	0.557072	0.270613	0.209145	0.448698						0.231199											0.117559
Lactobacillaceae	0.0255552	0.0154094	0.0642215	0.00702226	0.060218	0.0565071	0.00413312	0.0430305	0.0957527	0.00884523	0.0678071	0.013407	0.0432534	0.0248912	0.0468831	0.144026	0.00413439	0.00228181	0.0194249	0.00869796	0.0213214	0.0919457	0.00681175	0.0211822	0.0476791	0.0181747	0.0771766	0.23497	0.0172799	0.0283406	0.0387961	0.16584	0.0504004	0.0458436	0.0808859	0.0707345	0.0436073	0.0484661	0.128436	0.039122	0.113842	0.0546189	0.0991735	0.0997191	0.064749	0.114381	0.288484	0.0342017	0.0187715
Streptococcaceae	0.0106514	0.121539	0.117353	0.00227695	0.00303587	0.082563	0.00210176	0.0205306	0.0689031	0.00714022	0.0780742	0.0185646	0.00479379	0.0116835	0.018107	0.129084	0.00111377	0.00151305	0.00201509	0.0416817	0.00427713	0.00229679	0.0206497	0.0159734	0.0155017	0.0921997	0.134011	0.351345	0.00123359	0.00227898	0.0446406	0.0404023	0.00402649	0.000193644		0.0215633	0.00383968	0.00263537	0.0167126	0.00292727	0.0108638	0.00142195	0.00308307	0.00239542	0.00344711	0.00940325	0.0156178	0.00104221	0.00133782
Enterobacteriaceae	0.0137345	0.0214162	0.0420997	0.0268236	0.0271559	0.00898509	0.00919221	0.143749	0.0295689	0.017073	0.00727285	0.0118692	0.00850047	0.0201942	0.0154553	0.0217539	0.0108923	0.00562362	0.00906384	0.00528257	0.00478709	0.00680492	0.155923	0.0130184	0.0215215	0.130511	0.010765	0.183553	0.000235577	0.000213106		0.00298137	0.00194264	0.0107162	0.00247725	0.000100917	0.035093	0.0158061	0.00021291	0.000489341	0.000549424	0.000677723	0.00055722	0.00519838	0.00961043	0.00234885		0.00347937	0.00139751
Turicibacteraceae	0.0113707	0.0338841	0.035528	0.085545	0.0131388	0.0156091		0.0546397	0.0216964	0.0332518	0.0116004	0.0304691	0.0505433	0.0558321	0.0665236	0.0619783	0.0118007	0.0284717	0.0510588	0.0474179	0.0705149	0.00801454	0.0132716	0.0123358	0.0171015				0.101476							0.0875711
Atopobiaceae	0.00972704	0.0245202	0.01028	0.0235681	0.00409269	0.0278848	0.0195095	0.0225155	0.0450246	0.0149333	0.0122072	0.0261091	0.0198306	0.00940711	0.0136176	0.0111487	0.00370285	0.00176814	0.0203165	0.024521	0.0159457	0.0107751	0.0526999	0.0468698	0.0131822	0.026657	0.0831115	0.0661809						4.32e-06		0.000108863								0.000718547	0.000211712
Veillonellaceae	3.9e-06	0.00234543	5.49e-05	4.93e-06	5.98e-05	0.0110096	2.54e-05	1.64e-05	0.00394849	0.00802743	0.0072696	0.0109068	0.00304911	0.00531634		0.0096673	0.00458136	0.0126343	2.78e-05	0.0134376	0.00580399	0.00460759	0.0116357	0.0162427	0.0369272	0.0335907	0.0539557	0.192146
Carnobacteriaceae	0.0106779	0.00363187	0.00122578	0.000607103	0.00375237	0.0895048	0.00288879	0.00256489	2.47e-05	0.000914994	0.0329696	0.0112401	0.00621222	0.00053083	0.000897343	0.056745	0.00277768	5.16e-05	0.00193994	0.011668	0.000139018	0.0138227	1.64e-05	4.97e-05	6.63e-05	2.68e-05	1.68e-05	0.000170839	0.00387305	0.002134	0.000375906					0.0442808	6.81e-05			0.000268006	0.0357786	0.000550767	0.00031955	0.0015053	4.33e-05		0.056463	0.00222184	0.000872972
Coriobacteriaceae	0.00555644	0.00336471	0.00337378	0.0065318	0.00684949	0.000481331	0.0162644	0.00617129	0.00327885	0.00375479	0.00163607	0.00417749	0.0054691	0.0427549	0.0218437	0.0120491	0.0049249	0.0198604	0.00574069	0.00881787	0.00482252	0.0079348	0.0022819	2.39e-05	0.00165016	0.00261312	2.21e-05	0.00262747	0.000104775	0.0014629	0.000185104					0.000113565	7.08e-05	5.44e-05	0.000130026	0.000136043						0.000239943
Oscillospiraceae	0.00236295	0.00137093	0.00154169	0.00177661	0.0082768	0.00112917	0.000919853	0.00219647	0.0021729	0.00268001	0.00179979	0.00183673	0.000559359	0.00374588	0.00233582	0.00113444	0.000711501	0.00104506	0.000964746	0.000502282	0.000857758	0.000911008	0.00467379	0.00416292	0.0020615	0.00338414	0.00452296	0.00643922	0.00311467	0.00272432	0.00302286	0.00163339	0.0207038	0.0038685	0.00230435	0.00116115	0.00140294	0.00136275	0.00326772	0.00232151		0.00554769	0.0204366	0.00601019	0.00215379	0.0070622	9.55e-05	0.0123891	0.0195144
Prevotellaceae	0.000723447	0.00168135	0.00110157	0.000748224	0.00426662	0.000765862	0.000457173	0.000867809	0.00223818	0.003332	0.0024572	0.00131879	0.000700854	0.000702141	0.00104301	0.00143763	0.0011412	0.00093946	0.00115576	0.000454653	0.00302563	0.00050825	0.0182888	0.0269417	0.0131506	0.0231023	0.0203855	0.0260955	0.000297831	6.35e-05	6.76e-05	0.000142335		0.00102293	0.000290438	7.71e-05	9.02e-05	3.05e-05	0.000162734	0.000171022	0.000230315	0.000172397	0.000183156	0.000469858	0.000575536	0.000406331	0.000177656	0.000296551	0.00161777
Chlamydiaceae	3.43e-05	0.00496483	0.0071854	0.0069004		0.00226197	0.00354861		0.0122725	0.00737145	0.00270874	0.0197649	0.0182979	0.0100506	0.0205994		0.00206762	0.00678913	0.00677603	0.00523346	0.00388318			2.84e-05	0.0106514		0.00171482									0.000187281			0.00208439				0.00163319	0.000976352	0.00137546	0.00561428			0.00580019
Corynebacteriaceae	0.00604694	0.00725818	0.0177125	0.00918026	1.94e-05	0.00141101	0.0197127	0.000149056		0.00410252	6.88e-06	0.00763776	0.00230684	0.00226591	0.00602925	0.0107812	0.00432422	2.14e-05	0.0046801	0.00550415	0.00192555	0.0159577		5.87e-06		6.24e-06			5.25e-05	5.67e-05												0.000247687				0.000337475
Lachnospiraceae	0.00161086	0.00281452	0.00407606	0.00434605	0.00621532	0.00216658	0.00263021	0.00822414	0.00924271	0.00532773	0.00262309	0.00300389	0.00135137	0.00507672	0.00638122	0.00364531	0.00207438	0.000864717	0.00150643	0.00289498	0.00193718	0.00152143	0.0058701	0.00423576	0.00318035	0.0059171	0.00759989	0.00964123	0.00034314	0.000600384	0.000374191	0.000687446	0.00240429	0.00240469	0.0067313	0.000289964	0.00308531	0.00324837	0.00227521	0.000895313	0.000214166	0.000711345	0.000402357	0.00161181	0.00147609	0.00260545	0.000580882	0.00152541	0.00137162
Bifidobacteriaceae	0.00352607	0.0105405	0.0015559	0.0046577	0.000271805	0.000101538	0.00112927	0.000266025	0.00100261	0.000691933	0.00261273	0.00446415	0.00302725	0.00173138	0.00322131	0.00464936	0.000759349	0.00702865	0.000229499	0.000608189	0.00115081	0.000153612	0.000826615	0.000759292	0.0027353	0.00168969	0.00365436	0.00390611	0.000232941	0.000288007	0.000263239	0.000554235		0.000211004			0.000355153		0.0001452	0.00107316	0.000216834						0.000552885		0.000742042
Bacteroidaceae	0.00148815	0.000582107	0.000374241	0.00565564	0.000546891	0.000532562	0.00028966	0.00152378	0.000490714	0.000260423	0.000603531	0.0010975	0.00192151	0.00131844	0.000929305	0.000239292	0.00130574	0.0839312	0.00817015	0.000160226	0.0004392	0.00176214	0.00176818	0.00181132	0.00153915	0.00578916	0.00251575	0.00288732	0.000117038	0.000836505	0.000192894	2.51e-05	9.42e-05	0.000341952	0.000129766	0.000145944	0.000251245	4.84e-05	6.9e-05	0.000108381	0.000176015	0.000227056		0.000153637	0.00026813		0.000703859	0.000600682	0.00118201
Peptostreptococcaceae	0.00855643	0.00122212	0.000438554	0.00108056	0.000672086	0.00326692	0.00394172	0.000274134	0.000684177	0.000284551	0.000878493	0.00221792	0.00100276	0.000222641	0.000867852	0.000771035	0.00114659	8.71e-05	0.000496488	0.000703521	0.000587323	0.00224267	0.000279829	0.000271375	0.000302747	0.000400981	0.000115665	2e-05	0.00899064	0.0119171	0.00505356	0.000240316	0.00398264	2.85e-05	3.69e-05	0.00574068	0.000761805	0.000429736	0.000520076	0.000254673	0.000219105	0.00232288	0.000481057	0.000212896	0.00151709	0.00302551	0.000928182	0.00328853	0.000997004
Clostridiaceae	0.00115873	0.000743957	0.00091064	0.00196867	0.00406739	0.000663349	0.000437318	0.00172697	0.000845717	0.000769331	0.000496892	0.000459117	0.000345702	0.00114173	0.000971545	0.000899822	0.000302931	0.000230615	0.000388369	0.000566285	0.000494079	0.000391723	0.00137648	0.000890934	0.000908521	0.00174808	0.00205389	0.00196991	0.00489135	0.00731558	0.00463024	0.00206894	0.0103587	0.00663049	0.0105987	0.00219418	0.00213049	0.00155631	0.00184517	0.00172287	0.000647087	0.00168023	0.00147243	0.00150876	0.00190788	0.00465659	0.00295735	0.00246423	0.00323159
Acidaminococcaceae	0.000585913	0.00177701	0.000542199	0.000302872	0.00370374	0.00158068	0.000566983	0.000613675	0.0019498	0.0037648	0.00191954	0.00284536	0.000522983	0.00109032	0.000765654	0.00183838	0.000467571	0.000214766	0.000584244	0.00109108	0.00243388	0.000798493	0.00530023	0.005283	0.0123731	0.0101536	0.00466368	0.00596456	0.000776626	0.00100417	0.00132439			0.000891764	0.00175992	0.000743126	0.00130424	0.000225412	0.00205188	0.00163538		0.00058517		0.00262904	0.000578146	0.00210035		0.00588928	0.00750873
Odoribacteraceae	2.71e-05	2.82e-05	1.83e-05	0.0326232	1.4e-05		0.0522612	7.51e-06	3.19e-05	1.74e-05	2.47e-05	1.69e-05	0.011825	1.71e-05	3.28e-05	1.89e-05	0.00606016	4.42e-06	4.03e-05	1.18e-05	5.66e-05	1.25e-05	7.2e-05	9.09e-05	5.43e-05	6.09e-05	3.31e-05	6.97e-05	3.86e-05					2.91e-05
Planococcaceae	0.00051526	0.00013202	0.000116326	6.47e-06	2.96e-05	0.000883027	0.000332663	7.55e-06	3.83e-05	0.000948895	0.00230127	0.011433	0.000893518	0.000552902	2.11e-05	0.00984033	0.0024595	4.71e-05	0.00120224	0.00220558	0.00141158	0.00158312	4.47e-06	5.35e-06					0.00182037	0.00153444	0.000471132					0.0002004	0.000229824			0.000381318	0.00228131	0.015637	0.00126215	0.000955924	0.000315676		0.0018799	0.00800584	0.00226629
Aerococcaceae	0.00637807	0.00199714	0.00107825	0.00121464	0.000160496	0.0039211	0.00155298	0.000161627	0.000129825	0.000516075	0.00165857	0.00476939	0.000838054	0.00395132	0.00194856	0.00564866	0.00181233	0.0100158	0.000475307	0.00582504	0.00948031	0.00273439	1.52e-05	2.1e-05	4.89e-06				0.0041706	0.00201011	0.000422123	0.000602761				0.00106764					0.000355242	0.00145726	0.00247834		0.000215151		0.00077426		0.00072763
Erysipelotrichaceae	0.0017812	0.00194326	0.00172483	0.00276774	0.00153849	0.000683874	0.0022669	0.00258601	0.00237582	0.00114248	0.00064726	0.00136397	0.00180725	0.00281053	0.00242158	0.00345408	0.000697406	0.000814964	0.00136905	0.00284078	0.00162727	0.00147377	0.000824693	0.0013266	0.000883651	0.00146515	0.00165154	0.00244385	0.0012728	0.00149305	0.00125145	0.00219454	0.00271677	0.000824873	0.00204151	0.000829337	0.00123502	0.00158801	0.00191066	0.00137114	0.000663573	0.00166163	0.0014503	0.00215475	0.00078893	0.00182928	0.000975545	0.00318643	0.00456833
Eubacteriales Family XIII. Incertae Sedis	0.00158728	0.00344966	0.00114873	0.00341954	0.000568934	0.00136526	0.00105431	0.00169161	0.00158046	0.000539285	0.000429452	0.000614128	0.00164349	0.00494994	0.00314846	0.00135853	0.000448569	0.000850791	0.000939619	0.00179729	0.00399579	0.00314011	0.000525756	0.000260906	0.00146599	0.00200283	0.000420571	0.00113887	0.00243142	0.00120968	0.000664113	0.00050797	0.00175991	0.000213485	0.000359236	0.000105847	0.00142654	0.000193361	0.000316533	0.000217046	0.000126722	0.000291934	0.0004797	0.0052645	0.000476241	0.000455098	0.000179288	0.000331512	0.000806434
Staphylococcaceae	0.00215858	0.000869167	0.000806633	0.000498415	9.66e-05	0.00122415	0.000118828	0.0004777	0.000109947	8.09e-05	0.00229757	0.00159249	9.15e-05	9.28e-05	6.73e-05	0.00650874	0.000950546	0.000216371	0.00168439	0.000788815	9.69e-05	0.00296461				5.68e-06			0.00852273	0.00882208	0.000135456	0.000364093	0.00029133		0.000203232	0.000569237	0.00173088	0.00287709	0.000352917	0.000158377	0.000787138		0.00107372	0.000670641	9.07e-05	0.000463927	0.000714009	0.00917222	0.00309591
Eubacteriaceae	0.000868997	0.00050445	0.000884153	0.000415881	0.00515392	0.000720885	0.000999511	0.00111693	0.000931312	0.00274722	0.00123327	0.000386641	0.000509503	0.00112364	0.00197598	0.00105286	0.00120216	0.000517216	0.00071425	0.000367698	0.000587188	0.000444975	0.00273699	0.0032025	0.00150312	0.00384444	0.00136538	0.00314844	0.00216926	0.000938937		0.00100211	0.000191646	0.00201307	0.000573248	0.000436723	4.71e-05	0.000619149	0.00020448	0.00229743			0.000198696	0.00604636	0.00166281	0.00161844		0.00170734
Enterococcaceae	0.00351678	0.000626419	0.000227968	0.000492684	0.000273361	0.00247449	0.00221883	0.000320698	0.000636428	8.62e-05	0.00326024	0.000711324	0.000849976	0.00224275	0.000589201	0.000987875	0.000883995	0.00113749	0.000412449	0.00128541	0.000200617	0.000802145	0.000896394	0.000505439	0.000141204	0.000522115	0.000394541	0.00574995	0.000550559	0.000990223	0.00155362		0.00151579			0.000298988	0.000392275		0.000961705	0.000251605	0.000727137	0.00160467	0.00103167	0.000481718	0.000466984		0.000634878	0.00073111	0.0104785
Weeksellaceae	1.26e-05	1.45e-05	1.88e-05	6.47e-05	2.84e-05	0.0026905	0.00052291	2.12e-05	2.35e-05	1.55e-05	0.000284919	0.00898985	0.00329846	1.12e-05	1.9e-05	1.34e-05	0.000975992	5.8e-05	0.0151003	0.00143995	2.58e-05	0.000755719	0.0001087	0.000100652	4.1e-05	7.68e-05	8.79e-05	0.000108848	2.17e-05	3.53e-05		2.13e-05	4.78e-05	1.82e-05	3.49e-05	1.1e-05	7.03e-06	1.93e-05	2.41e-05	4.02e-05		0.000894616	0.000511101		6.94e-05	4.63e-05	4.44e-05	6.56e-05	0.000170792
Treponemataceae	0.00198735	0.0010703	0.00135054	0.00195795	0.000687952	0.00329189	0.000181699	0.000794572	0.000816263	0.000679793	0.000520715	0.00117541	0.000844661	0.000873053	0.00176343	0.000907037	0.000353134	0.000403318	0.00146184	0.000770212	0.00143027	0.000594768	0.00455015	0.00418414	0.00300549	0.0049151	0.00211067	0.00126821	0.00031866					8.48e-05		4.97e-05								0.000201247	0.000204537
Alcaligenaceae	0.0277082	5.56e-06		0.000331181		0.000235642	6.16e-05		8.2e-06	1.57e-05	0.000147626	0.00016734	0.00198641	2.28e-05	3.19e-05	0.000537351	0.00225434	3.08e-05	0.00070975	9.71e-05	3.42e-06	2.39e-05														3.51e-05						0.00274327	0.000143824
Muribaculaceae	3.99e-05	2.61e-05	4.36e-05	2.87e-05	7.7e-05	9.48e-06	1.46e-05	3.33e-05	3.9e-05	4.58e-05	1e-05	1.76e-05	2.24e-05	0.00257672	4.81e-05	1.75e-05	3.68e-05	2.16e-05	1.3e-05	7.39e-06	5.37e-05	9.87e-06	0.0127455	8.98e-05	3.86e-05	0.00324398	0.00748469	0.00737267	5.54e-05					5.44e-05			4.45e-05					0.000127461			0.00011434			0.000211779
Aurantimonadaceae	0.000527559	0.00238564	0.00295971			0.000938213	0.000676752	0.00013918	0.00354691	0.00066842	0.00151375	0.000358541	8.04e-05		3.89e-05	0.000247758		2.25e-05	5.23e-05	0.00102575	6.92e-05		0.00014472	0.000268516	5.6e-05	0.000928214	0.000332022	0.00235916	0.000463754		0.000471771	0.00115926				0.000731385	0.000361465		0.00282662	0.0012686	0.00117207						0.000292687
Selenomonadaceae	0.000231441	0.000298584	0.000578875	0.000601394	3.92e-05	0.000913631	0.000471533	0.000106418	0.000225863	0.000906387	0.00151024	0.000530952	0.000639802	0.000434846	0.000488722	0.000130476	0.00028746	2.01e-05	0.000285631	0.00013862	0.000315027	8.09e-05	0.00190774	0.00202269	0.00171737	0.0063359	0.00154534	0.00660192						3.58e-05						0.000168127					0.00315318
Moraxellaceae	0.000201024	0.000377735	0.00028722	3.58e-05	3.32e-05	0.00361303	0.000165835	1.99e-05	2.6e-05	5.98e-05	0.00628547	0.00252872	0.000533791	1.99e-05	7.71e-05	0.00131438	0.000316684	2.33e-05	0.00099353	0.000156649		0.00113491	5.74e-06	2.02e-05		9.48e-06	8.99e-06		0.000141926	0.000121045	0.000171694					0.00172164					0.00115913	0.000863655	0.000544714		0.000207771		0.00126377	0.00109746
Desulfovibrionaceae	2.84e-06	0.00107252	0.000116585	0.00474153	6.39e-06	6.1e-05	1.18e-05		3.73e-06	0.000548937	0.00183407	0.00117461	0.00143237	0.000774957	3.54e-06	0.000536361	0.00146727	1.54e-05	0.00110748	6.88e-06	0.000893084	0.000802771	0.000188522	0.00188639	3.66e-05	0.00101026	0.00338958	5.41e-05		5.81e-05	0.000176035		0.000267286																0.000959748
Coprobacillaceae	0.000505344	0.000313707	0.00010246	0.000364573	0.000115416	7.93e-05	0.00049715	0.000464195	0.00040568	0.000393655	6.29e-05	0.000173655	4.16e-05	0.000452963	0.000398329	0.000206867	0.000130093	6.71e-05	9.7e-05	0.000183501	6.44e-05	0.000240565	0.000106916	8.9e-05	7.03e-05	0.000323928	0.000356117	0.000502784	0.000702946	0.000802589	0.000713514	0.000391116	0.00116613	0.000120819	0.000254406	0.00019589	0.000428589	0.000288365	0.00047373	0.000669895	0.000761144	0.00105697	0.000574868	0.00207586	0.000395688	0.00128122		0.00108907	0.00177712
Morganellaceae	8.96e-06	4.7e-05		9.7e-05	2.4e-05	0.00301327	6.29e-06			1.4e-05	0.00239002	5.84e-05	0.0020158	1.56e-05		0.000171127	0.000377186		0.000864957	0.000135089		0.000360264																					0.00887251					0.00389856
Actinomycetaceae	0.000190234	0.00076488		6.24e-05		8.51e-05	0.000797653				4.48e-06	0.0012208	0.000909655	0.00566227	0.00838585	2.64e-05		0.000488471	9.37e-06	0.001689		0.00406387			7.88e-05	7.44e-06
Pseudomonadaceae	7.29e-05					0.00630082					0.000519311	0.000683354	0.00165087	1.4e-05		0.000205412	1.9e-05		0.0030734	0.000164131		0.00129356				4.45e-06			0.00014011			0.00043342				0.000638355								0.00060104
Synergistaceae	0.0156999			4.92e-06			0.00142708						3.17e-06		4e-06		0.00594116	1.39e-05		8.88e-06		2.28e-06
Peptoniphilaceae	0.00220784	0.000753221	0.000262489	0.000588479	9.66e-06	0.00035658	0.000717581	0.000172246	0.00039867	1.69e-05	0.000237965	0.00059561	0.00028238	3.26e-05	1.27e-05	0.000274974	0.000715009	0.000157188	5.2e-05	0.000270638	2.73e-05	0.000156823	1.09e-05	8.84e-06		0.000803774		0.00310811	0.002143	0.00132312						0.000434135					0.000343944	0.000446418	0.00114786
Eggerthellaceae	0.00112231	0.00157237	0.000958883	0.00205368	0.000245315	0.000522836	0.000332722	0.000469395	0.000622876	0.000261664	0.000176118	0.000196607	0.000635072	0.000830886	0.000757981	0.000326561	0.000131304	0.000293713	0.000423156	0.000357087	0.000657247	0.000375146	0.00043809	0.000155163	0.00085903	0.000725132	0.00026485	0.000853807	0.000292477	0.0002484	0.0001815	0.000144684		7.84e-05		7.99e-05	0.000239056	0.000223342	0.000103724					0.000264559	8.17e-05
Yersiniaceae													0.000253866									4.63e-06			0.0176257
Flavobacteriaceae	1.22e-05	1.35e-05	8.43e-06	1.02e-05	1.06e-05	2.38e-05	2.64e-05	1.12e-05	1.12e-05	3.69e-06	3.4e-05	0.000325652	4.36e-05	1e-05	7.73e-06	2.06e-06	0.000619516	2.75e-06	0.000502393	2.1e-05	1.15e-05	1.52e-05	2.33e-06	1.01e-05	4.04e-05	8.17e-06	1.06e-05	1.03e-05	2.12e-05					2.83e-05	8.38e-05	2.41e-05	1.59e-05				4.88e-05		0.000119603	0.000107546	4.91e-05	0.000114706	4.39e-05		6.1e-05
Listeriaceae	0.000396356	2.18e-05				0.00031822	4.48e-05		0.000878322		0.000403189	0.000461242	3.03e-05	4.86e-05	5.82e-05	0.0028568	0.000514368		3.2e-05	0.000634069	5.06e-05	3.44e-05						0.00203018	8.6e-05							0.000279299					0.0010531						0.00176476	0.00104386
Fibrobacteraceae	0.000147024	0.000129217	8.46e-05	3e-05	0.000425686	0.000131964	5.66e-05	0.000212199	0.000376043	0.000132175	4.86e-05	6.6e-05	0.000101168	8.24e-05	0.00013237	5.04e-05	6.69e-05	0.000181282	4.17e-05	2.87e-05	0.000105439	5.11e-05	0.00158004	0.00245276	0.000512886	0.000687595	0.0023565	8.59e-05	0.000137842					0.000314445		5.31e-05	0.000178466								0.000170961	0.000566239			0.00179807
Comamonadaceae	3.23e-05	4.62e-05		6.9e-06		0.000133966	1.1e-05				2.95e-05	1.51e-05	0.000744731		2.55e-06		0.00182571	5.25e-05	0.00225789	1.48e-05		0.000562155							0.000160845							0.00038584							0.000491381
Micrococcaceae	9.6e-05	0.00148718	9.05e-05	4.41e-05	0.000114408	4.31e-05	0.000117625	1.71e-05	2.09e-05	5.32e-05	1.94e-05	1.75e-05	1.44e-05	3.09e-05	2.32e-05	1.05e-05	2.18e-05	6.14e-06	2.56e-05	3.78e-05	1.11e-05	0.00428008	1.16e-05	1.45e-05	0.000189237	7.75e-06	1.07e-05	6.55e-06	5.61e-05	0.000107084				1.59e-05		0.000241236												6.4e-05
Rikenellaceae	0.00025526	2.37e-05	3.11e-05	0.000903224	7.65e-05	2.16e-05	0.00147053	8.01e-05	2.26e-05	4.95e-05	1.87e-05	1.83e-05	6.21e-05	0.000745104	1.92e-05	1.44e-05	0.00131632	2.87e-05	3.22e-05	1.39e-05	6.45e-05	1.23e-05	7.87e-05	0.000109255	8.81e-05	7.09e-05	5.81e-05	5.14e-05	3.02e-05					0.000117554			3.24e-05				7.69e-05				3.61e-05
Helicobacteraceae			1.4e-05	3.88e-05	2.12e-05		2.8e-05	0.000101741	0.000853303	1.3e-06	1.05e-05	1.68e-05	7.84e-05	3.15e-06		3.81e-05	3.05e-05	5.06e-05	1.52e-05	1.73e-05	1.17e-05			0.0037271	0.000618027		1.49e-05												0.000104601
Brachyspiraceae		1.4e-05	0.00516657				2.82e-06	5.16e-06				4.31e-06		3.71e-06			3.09e-05		6.28e-06	1.13e-06	1.01e-05	8.32e-06																					6.44e-05				0.000213361
Fusobacteriaceae		6.52e-05					0.00140233										0.00276179	0.000176934				0.000107032			4.39e-05	0.000345642	0.000134595	9.41e-05
Pasteurellaceae	4.09e-05	7.49e-05		6.14e-06		3.76e-05	2.23e-05	3.55e-05	9.19e-06	1.83e-05	0.000171678	3.73e-06	8.45e-06	6.41e-06	8.5e-06				8.11e-05	9.96e-06	9.89e-06	2.37e-06	7.54e-06	1.42e-05		6.84e-06	2.48e-05	2.45e-05		0.000233302			0.00247595			2.8e-06									7.8e-05
Bacillaceae	2.19e-05	1.05e-05	3.09e-05	7.55e-06	5.49e-05	2.32e-05	6.72e-05	2.3e-05	6.47e-06	3.37e-05	0.000116798	6.5e-05	6.63e-05	3.17e-05	1.01e-05	7.72e-05	0.000233159	3.62e-06	1.16e-05	1.8e-05	1.07e-05	2.25e-05	5.28e-06	1.25e-05	3.09e-05	3.84e-06	7.54e-06	8.55e-06	9.93e-06	9.3e-05		3.07e-05		2.41e-05		5.49e-05	2.62e-05		5.31e-05	0.000829978		0.000438418				0.000132852	0.000431472	5.35e-05	9.75e-05
Neisseriaceae						1.93e-05	9.3e-06					1.44e-05					0.00353465		0.000127782
Campylobacteraceae		0.000130819	0.000315744						6.76e-05	1.08e-05			0.000143664	0.000186921	0.000172528				8.22e-05		0.0011181	0.00089559			0.000106319							0.00012071													0.00020036
Peptococcaceae	3.18e-05	3.67e-05	2.18e-05	1.38e-05	3.25e-06	6.6e-05	1.07e-05	1.33e-05	1.15e-05	7.91e-06	5.78e-05	7.68e-06	1.39e-05	6.49e-05	4.03e-05	6.15e-05	5.76e-06	2.13e-05	3.26e-05	1.9e-05	1.08e-05	4.96e-05	4.11e-06	2.9e-05	8.16e-06	2.76e-05	0.000319474	0.000408598	4.88e-05		0.000524384	0.000463808		4.37e-05		5.95e-05											0.000531386	9.92e-05
Streptomycetaceae	2.11e-06	1.84e-06	1.31e-05	3.8e-06	5.02e-06	5.62e-06	4.74e-07	4.65e-06	1.5e-06	1.52e-06	4.12e-06	2.36e-05	5.37e-06	5.09e-06	3.58e-06	2.51e-06	9.94e-07	0.000492676	2.4e-06	1.18e-06	3.68e-06	2.14e-06	1.14e-05	3.39e-06	2.27e-06	1.11e-05	3.33e-06	4.4e-06	7.39e-06	6.63e-05			0.000502807	1.86e-05	1.04e-05	1.43e-05	1.3e-05		2.35e-05	4.71e-05					8.14e-05	0.000231032		0.000239282	0.000910688
Christensenellaceae	2.6e-05	1.61e-05		2.65e-05	3.76e-05	3.05e-05	0.00222924			3.7e-05	3.73e-05	1.19e-05					2.12e-05			1.28e-05	2.74e-05	5.27e-05			0.000217995
Brevibacteriaceae	1.14e-05	1.63e-05		4.48e-05		2.87e-05	4.09e-05						1.73e-05	1.13e-05	0.000117741			3.6e-05	0.000259666	2.41e-05		0.00112429							7.15e-05				0.000858194
Marinilabiliaceae	5.49e-06	2.95e-06	5.09e-06	1.28e-05	4.71e-06	8.92e-05	1.8e-05		3.07e-06	5.77e-06	4.82e-06	6.95e-06	1.28e-05	6.21e-06	2.25e-06		7.49e-06	2.45e-06	0.000982173	6.24e-06	8.07e-06	3.01e-05	1.99e-05	5.77e-06	6.14e-06				1.35e-05							1.89e-05			4.19e-05						2.75e-05
Chromatiaceae					0.00168882														8.24e-05										2.37e-05					0.000578588						0.000102599
Tissierellaceae	0.000326966	8.64e-05		0.000156272		0.00013847	0.000148258				6.07e-05	8.14e-05	2.34e-05			7.08e-06	4.32e-06		8.57e-06	2.41e-05		3.62e-05							0.00022361	0.00081985						0.000107494				5.29e-05
Oxalobacteraceae	0.000300058	5.58e-05					5.61e-06						1.15e-05				2.3e-06	0.000119822	0.000142159	6.27e-05		0.000787918							0.000228664	0.000309929				0.000119364
Spirochaetaceae	6.14e-05	1.87e-05	1.74e-05	1.07e-05	4.48e-05	1.78e-05	5.92e-06	1.24e-05	2.71e-05	2.08e-05	3.57e-05	9.99e-06	1.95e-05	2.55e-05	2.29e-05	2.69e-05	4.56e-05	1.65e-05	1.9e-05	6.18e-06	6.93e-05	1.36e-05	5.69e-05	0.00021209	5.59e-05	2.56e-05	0.000110702	0.000108922	6.45e-05	0.000346728														0.00021239
Dietziaceae	0.000146273	1.86e-05	4.67e-05	7.56e-05	1.79e-05	1.39e-05	0.000345445					1.41e-05	1.48e-05	5.28e-06	1.04e-05			9.68e-06	7.29e-06	8.37e-06		0.00027701	7.2e-06	7.28e-06		6.72e-06			0.000121512	0.000185748	0.000120225					9.73e-05													0.000223226
Oceanospirillaceae				1.15e-06		0.000832728	5.95e-07	2.89e-05										1.91e-06	6.42e-05	1.26e-06	1.51e-06	2.89e-05													2.51e-05	0.000619606													0.0001
Vibrionaceae			3.16e-05		3.33e-06	8.77e-05	7.22e-07			8.24e-07	1.86e-06	1.86e-05	0.000887126				7.63e-07	4.92e-06	2.17e-05		1.34e-06	2.68e-05	1.47e-06	3.12e-06		2.81e-06		1.04e-05		1.91e-05													6.88e-05						0.000295284
Azonexaceae			3.48e-05	1.42e-05				1.2e-05	0.000108604			3.61e-05		0.000583414	0.000244065	8.72e-05						2.03e-05			5.61e-05	1.32e-05	3.3e-05																		0.000301801
Thalassobaculaceae								0.000637197				0.000787038					0.000104203						4.18e-06	4.71e-06	3.13e-06
Alcanivoracaceae	7.31e-06	9.32e-06	1.05e-05	5.72e-06	2.49e-05	1.22e-05	4.86e-06	9.37e-06	1.72e-05	2.34e-05	1.55e-05	9.49e-06	1.1e-05	8.61e-06	8.78e-06	1.42e-05	7.5e-06	4.98e-06	8.63e-06	3.77e-06	1.68e-05	4.68e-06	9.11e-05	8.84e-05	4.61e-05	7.4e-05	0.000112404	0.000119331	1.09e-05	4.77e-05				2.69e-05	3.09e-05	4.4e-05	1.42e-05		1.48e-05	6.06e-05	4.92e-05			7.26e-05	3.5e-05
Erwiniaceae												1.66e-06		0.000280011	0.000328607																													0.0005563	0.00022628
Streptosporangiaceae	1.96e-05	7.06e-05	1.32e-05	2.68e-05	0.000133917	1.23e-05	3.26e-05	1.11e-05		2.91e-05		1.33e-05	1.14e-05	1.09e-05			2.4e-05	0.000193608	0.000111849	3.46e-06	1.23e-05	4.9e-05							4.65e-05					5.72e-05															0.000348637
Mycobacteriaceae													0.00103131		1.43e-06		0.000240449
Propionibacteriaceae	2.29e-05	1.91e-05		1.13e-05	1.41e-05	4.54e-05	3.04e-05		2.11e-05	1.72e-05		4.11e-06	2.11e-05	0.000122572	0.000172931	2.47e-05		0.000180735	7.54e-05	0.000125197	6.51e-05	3.92e-05	1.06e-05		4.28e-06									1.73e-05	5.63e-05
Dysgonomonadaceae		4.15e-06		1.53e-05		4.41e-05	4.5e-05			8.77e-06	6.57e-06	4.46e-05	2.73e-05			4.76e-06	1.48e-05		0.0002665		1.11e-05	4.96e-05												3.23e-05
Dermabacteraceae	3.59e-06	3.08e-06				3.75e-05	4.14e-05		5.92e-05				3.51e-06									0.000941386
Aeromonadaceae																									1.98e-05	1.32e-05		0.000169104															0.000861016
Sutterellaceae	5.95e-06	0.000149281		3.1e-06	9.45e-06	1.3e-06	5.39e-06	1.2e-05		5.12e-06	8.58e-06	2.86e-06				6.84e-06	3.22e-06	7.61e-06			4.8e-06		2.47e-05	5.64e-05	6.67e-06	2.05e-05	5.54e-06	0.000588555	4.38e-05
Anaplasmataceae													1.4e-06	0.000121914	0.000104866			7.25e-05				1.24e-06												5.54e-05														0.000544024
Kiloniellaceae						0.000885866													1.5e-05
Jonesiaceae	5.64e-05	2.23e-05					1.89e-05			1.99e-05			4.02e-05	1.51e-05	2.33e-05				0.000142278	9.7e-05	7.09e-06	0.000241718								0.000215528
Sphingobacteriaceae		8.04e-06			2.82e-05	8.98e-06	0.000264505				2.93e-06	1.96e-05	6.69e-06		9.39e-06	9.32e-06	1.67e-05	1.64e-05	1.03e-05	1.78e-05	3.49e-05	2e-05			6.75e-06	1.38e-05															0.00014367
Microbacteriaceae	7.33e-05	1.38e-05	2.9e-06	3.52e-05		1.31e-05	3.48e-05		2.29e-06	7.65e-06	7.32e-07		1.9e-05	3.87e-05	3.28e-05	5.54e-06		1.23e-05	8.17e-05	3.77e-05		3.7e-05	1.28e-06	7.37e-06					3.94e-05	0.000201539
Roseobacteraceae	7e-06	5.74e-06	6.91e-06	3.64e-06	8.99e-06	3.68e-06	6.55e-06	1.04e-06	5.47e-06	1.58e-05	3.87e-06	8.84e-06		1.76e-06	8.93e-06	2.89e-06	2.98e-06	4.07e-06	3.66e-05		6.29e-05	6.63e-06	1.24e-05	1.37e-05	9.6e-06	1.44e-05	1.2e-05	2.8e-05				3.1e-05		5.66e-05	5.69e-05	1.55e-05				5.92e-05					4.77e-05
Rhodobacteraceae	1.24e-05	0.000174439	6.67e-06	5.58e-06	6.3e-06	9e-06	2.57e-05	1.7e-06	9.71e-06	1.45e-05	1.9e-06	1.17e-05	3.06e-06	1.82e-06	1.02e-05	1.19e-05	7.04e-06	5.67e-06	1.39e-05	3.14e-06	2.83e-05	1.24e-05	1.66e-05	1.44e-05	1.3e-05	5.1e-06		2.9e-06	4.45e-05					1.4e-05		7.82e-05									1.61e-05	5.75e-05
Williamwhitmaniaceae	4e-05		1.4e-05		4.95e-05	7.77e-06	1.72e-05	5.05e-06	2.29e-05	4.68e-05	8.83e-06		2.96e-06		9.74e-06		4.54e-06	5.22e-06	1.42e-05		3.13e-05	2.73e-06	0.000150382	1.47e-05	4.13e-05	8.24e-05	2.31e-05	3.1e-05						2.91e-05											4.71e-05
Gordoniaceae	0.00012265						3.15e-05														6.67e-06	1.14e-05							0.000185229	0.000382935
Sphaerochaetaceae	3.85e-05					1.54e-05					9.98e-06	1.22e-05			1.84e-05	1.25e-05	5.29e-05		1.65e-05		0.000109287		4.6e-05	2.32e-05	2.62e-05	2.02e-05			0.000103781
Thermohalobacteraceae	2.11e-06			1.78e-06		6.57e-05			3.84e-06					8.72e-07	1.2e-06				1.67e-06	1.79e-06	2.05e-06															0.000551664
Alteromonadaceae	7.5e-06	1.35e-05	7.94e-06	6.3e-06	1.56e-05	3.35e-06	5.86e-07	5.48e-06	5.45e-06	2.08e-05	3.82e-06	3.23e-06	1.91e-06	1.45e-05	4.42e-06	6.99e-06	4.75e-06	2.93e-06		5.34e-06	5.97e-05	4.84e-06	3.22e-05	3.95e-05	4.93e-06	1.52e-05	1.37e-05	3.6e-05						1.52e-05
Deferribacteraceae		1.04e-05		1.11e-05	1.4e-05	1.11e-05	1.43e-05			6.08e-06	0.000142656		1.41e-05	1.69e-05	1.74e-05		2.75e-05		8.07e-06		3.29e-05		2.35e-05	1.93e-05	3e-05
Sphingomonadaceae		2.44e-06		8.63e-07		2.51e-05	5.16e-06				9.16e-07			1.25e-06					1.16e-06		9.58e-07		1.88e-06	1.19e-06	1.58e-06	9.16e-07		3.86e-06		9.89e-05				0.000113901											0.000230308
Brucellaceae	1.58e-05	4.57e-06		9.23e-06			0.000100024												0.000161323	1.22e-05		5.99e-06
Nocardiaceae	0.000200141	1.58e-06									1.24e-05		1.86e-06					2.63e-06	5.92e-06										0.000116362
Xanthomonadaceae		2.06e-05				5.01e-05	1.54e-05					1.43e-05	3.27e-05						7.98e-05			9.19e-06
Paenibacillaceae	2.85e-06	2.62e-06	2.19e-06	2.28e-06	2.2e-06	2.61e-06	9.19e-07	2.3e-06		1.47e-06	5.49e-07	1.47e-06	2.98e-06	7.86e-07	3.94e-06	4.23e-06		1.28e-06			1.73e-06	1.54e-06	5.7e-06	2.57e-06	2.99e-06				1.52e-05					5.89e-06		8.01e-06	7.97e-06						3.26e-05			8.39e-05
Chitinophagaceae		2.65e-05		6.67e-06							1.69e-05					9.43e-06			2.61e-06	2.52e-05		4.91e-05							1.39e-05
Succinivibrionaceae											8.88e-06							5.51e-06						2.94e-05	1.18e-05	2.63e-05	0.000146547	7.2e-05
Rhodocyclaceae									4.12e-05			4.3e-06		4.54e-05	4.62e-05					7.35e-06																0.000154158
Halomonadaceae								2.14e-05			1.53e-05								1.79e-05										1.83e-05					0.00018292
Pirellulaceae	1.74e-05	1.7e-05				4.98e-06				2.69e-06		1.39e-05	6.82e-06	1.34e-05	7.58e-06				6.2e-06	3.94e-06	1.61e-05	7.9e-06			6.61e-06				4.27e-05								4.37e-05
Caulobacteraceae							1.14e-05
Myxococcaceae	1.18e-05	7.06e-06	1.64e-05	3.88e-06	6.12e-06	2.47e-06		2.2e-06	4.46e-06	1.4e-05	2.64e-06	1.2e-06	1.69e-06	2.56e-06	6.81e-06		2.04e-06	2.22e-06	3.21e-06	6.92e-07	1.45e-06	1.92e-06	4.14e-06	1.54e-06	1.13e-05	1.84e-06			9.4e-06	3.65e-05
Prolixibacteraceae		2.99e-05				3.01e-05												4.1e-06	1.57e-05			4.14e-05
Nocardioidaceae				3.33e-05			1.16e-05																						6.16e-06	7.69e-05																		4.02e-05
Marivirgaceae							1.84e-05										0.000139883	4.8e-05
Rhizobiaceae	5.33e-06					1.11e-05	5.21e-06					4.13e-06					1.43e-05		5.63e-05	9.19e-06									9.79e-05
Tannerellaceae	1.52e-05		2.16e-06						1.15e-05	2.73e-06		2.47e-06	5.19e-05	2.96e-05			5.61e-05		5.64e-06
Saccharospirillaceae				6.42e-07		9.87e-07				1.65e-06				9.38e-07									3.86e-06						4.62e-06							7.74e-06								5.03e-05				5.65e-05
Anaeroplasmataceae											4.36e-05					1.03e-05							5.78e-05	4.6e-05
Colwelliaceae		1.23e-06		1.39e-06			6.53e-05			8.75e-07				1.36e-06	5.31e-06		6.64e-05					1.44e-06	2.07e-06					1.74e-06
Archangiaceae																																																	0.000143196
Nakamurellaceae				9.63e-06		2.79e-05									2.66e-05		1.76e-05			1.12e-05		3.91e-05
Victivallaceae		4.37e-06			1.82e-05	1.19e-05		5.73e-06		3.25e-06	3.97e-06			4.09e-06			3.72e-06						8.25e-06		6.1e-06		3.28e-06	6.49e-06
Burkholderiaceae						9.87e-07							9.77e-07		1.57e-06				1.32e-06		1.07e-06			1.33e-05						2.49e-05																		7.68e-05
Desulfobulbaceae	1.34e-06		1.43e-06	7.76e-07	1.67e-06	8.07e-07	8.55e-07							1.07e-06			1.04e-06	1.44e-06			1.79e-06					1.16e-06	1.42e-06							4.96e-06														4.55e-05
Flammeovirgaceae	1.15e-06			1.53e-06							5.73e-06																														0.000101134
Mycoplasmataceae			2.17e-05	1.08e-06								1.04e-05				1.31e-05								1.56e-05
Pseudonocardiaceae		3.22e-06					2.66e-06			7.38e-06	3.11e-06	1.65e-06	1.43e-06		1.12e-05	4.78e-06		2.33e-06	4.16e-06	1.47e-06		3.23e-05							2.11e-05
Tenuifilaceae		1.77e-05					5.93e-06			9.78e-06														1.75e-05		1.58e-05	2.9e-05
Kineosporiaceae						1.67e-05						5.04e-05
Cellulomonadaceae											2.62e-06								8.03e-06												5.86e-05					1.51e-05
Chromobacteriaceae	2.34e-06																											8.16e-05
Spirosomaceae				5.98e-06													1.27e-06		4.21e-05			6.63e-06		8.25e-06		1.46e-05
Ferrovaceae															4.48e-06								1.39e-05		5.75e-06		5.35e-06																		4.92e-05
Schleiferiaceae	2.54e-05																1.11e-05
Shewanellaceae	5.67e-06										4.56e-06																																6.74e-05
Sneathiellaceae																			2.11e-05					1.76e-05	3.85e-05
Devosiaceae	9.17e-07			4.54e-06			1.14e-05											4.52e-06				9.37e-06		9.85e-07
Beutenbergiaceae		4.71e-05																				2.42e-05
Natronogracilivirgulaceae	8.74e-07		1.29e-06	7.31e-07	1.3e-06	7.95e-07		1.24e-06		1.5e-06	8.24e-07	8.27e-07		7.35e-07				1.67e-06	1.43e-06			7.39e-07	1.33e-06		1.14e-06	5.55e-07		8.55e-07						7.14e-06		8.84e-06				2.2e-05					1.06e-05
Halieaceae																																																6.25e-05
Acholeplasmataceae		3.1e-06					1.13e-05						1.61e-05						6.66e-06		2.55e-06	4.18e-06
Xylanivirgaceae		2.59e-06		7.1e-06			2.18e-06				1.24e-05				5.47e-06	6.44e-06	4.13e-06	3.57e-06	3.46e-06		7.65e-06
Intrasporangiaceae	1.49e-05					2.27e-05						1.13e-06						5.25e-06				4.92e-06
Hymenobacteraceae										1.09e-05					5.92e-06								7.15e-06		1.32e-05	1.31e-05
Methylobacteriaceae		1.32e-06							1.98e-06												1.09e-06			1.21e-06
Nocardiopsaceae			4.04e-05
Oscillochloridaceae	4.85e-06	6.01e-06															9.59e-06				7.55e-06
Sporolactobacillaceae		1.25e-05					2.28e-06				1.26e-05
Dermatophilaceae						2.55e-05						7.3e-06								3.24e-06
Alicyclobacillaceae												3.65e-06																															3.08e-05
Phyllobacteriaceae																																														3.39e-05
Erythrobacteraceae																																				1.07e-05
Microscillaceae		3.43e-06								5.96e-06	3.26e-06										9.13e-06		5.43e-06
Acetobacteraceae		6.43e-07	1.45e-06	1.24e-06				3.84e-06	2.21e-06		1.03e-06			1.34e-06	4.69e-06	1.45e-06				2.58e-06	1.01e-06	1.27e-06	1.37e-06	1.96e-06
Budviciaceae											8.85e-06	3.91e-06				7.05e-06
Bradyrhizobiaceae													3.75e-06							2.2e-05
Promicromonosporaceae				9.32e-07							7.51e-06											1.69e-05
Cytophagaceae	6.03e-06																5.5e-06					1.32e-05
Marinobacteraceae							9.64e-07					8.24e-06	6.06e-06						1.31e-06	2.71e-06		1.33e-06
Culicoidibacteraceae	1.19e-05						1.09e-05
Sanguibacteraceae						1.33e-05
Rhodospirillaceae																							2.2e-05
Ornithinimicrobiaceae						1.75e-05																4.12e-06
Cyclobacteriaceae		3.7e-06									1.51e-06	7.56e-07		3.4e-06			2.92e-06					1.72e-06
Kordiimonadaceae											8.72e-06														5.22e-06		5.21e-06
Eubacteriales Family XII. Incertae Sedis	1.86e-05
Deinococcaceae	6.34e-06	8.79e-07		9.46e-07		7.52e-07	6.32e-07			9.02e-07											6.36e-06
Orbaceae																												1.56e-05
Zoogloeaceae	6.74e-06																7.37e-06
Heliobacteriaceae										1.44e-06				3.54e-06							2.62e-06	5.64e-06
Thermoactinomycetaceae			4.3e-06										1.41e-06			4.26e-06					2.66e-06
Terasakiellaceae																										1.16e-05
Hafniaceae												9.59e-06
Piscirickettsiaceae																												8.47e-06
Sporomusaceae													7e-06
Gottschalkiaceae						4.81e-06					1.89e-06
Tsukamurellaceae						1.64e-06														2.46e-06		2.06e-06
Crocinitomicaceae															2.52e-06											3.21e-06
Euzebyaceae												2.63e-06		2.95e-06
Desulfobacteraceae									1.74e-06	1.65e-06																2e-06
Fastidiosibacteraceae																							5.17e-06
Marinifilaceae				1.56e-06																		2.07e-06		1.35e-06
Rhodanobacteraceae		9.72e-07		1.13e-06			7.26e-07											1.82e-06
Beijerinckiaceae						4.47e-06
Desulfocapsaceae											3.82e-06
Desulfomicrobiaceae	3.56e-06
Geobacteraceae										3.47e-06
Vallitaleaceae																						3.43e-06
Hyphomonadaceae																			3.33e-06
Pectobacteriaceae						2.59e-06					7.35e-07
Dermacoccaceae																			3.28e-06
Desulfonatronaceae																			2.89e-06
Micromonosporaceae															2.82e-06
Amorphaceae			1.33e-06									8.3e-07
Bradymonadaceae											1.07e-06
[truncated: 10 more columns]

## Sheet: Table S9B_species
species_name	DTU_2024_1036880_100_MG_LVK_11_SE.mapstat	DTU_2024_1036881_100_MG_LVK_17_SE.mapstat	DTU_2024_1036882_100_MG_LVK_42_SE.mapstat	DTU_2024_1036883_100_MG_LVK_43_SE.mapstat	DTU_2024_1036884_100_MG_LVK_48_SE.mapstat	DTU_2024_1036885_100_MG_LVK_52_SE.mapstat	DTU_2024_1036886_100_MG_LVK_56_SE.mapstat	DTU_2024_1036887_100_MG_LVK_60_SE.mapstat	DTU_2024_1036888_100_MG_LVK_61_SE.mapstat	DTU_2024_1036889_100_MG_LVK_74_SE.mapstat	DTU_2024_1036890_100_MG_LVK_76_SE.mapstat	DTU_2024_1036891_100_MG_LVK_79_SE.mapstat	DTU_2024_1036892_100_MG_LVK_80_SE.mapstat	DTU_2024_1036893_100_MG_LVK_82_SE.mapstat	DTU_2024_1036894_100_MG_LVK_83_SE.mapstat	DTU_2024_1036895_100_MG_LVK_88_SE.mapstat	DTU_2024_1036896_100_MG_LVK_94_SE.mapstat	DTU_2024_1036897_100_MG_LVK_97_SE.mapstat	DTU_2024_1036898_100_MG_LVK_98_SE.mapstat	DTU_2024_1036899_100_MG_LVK_101_SE.mapstat	DTU_2024_1036900_100_MG_LVK_102_SE.mapstat	DTU_2024_1036901_100_MG_LVK_103_SE.mapstat	DTU_2025_1036880_101_MG_LVK_11.mapstat	DTU_2025_1036880_102_MG_LVK_11.mapstat	DTU_2025_1036881_101_MG_LVK_17.mapstat	DTU_2025_1036882_101_MG_LVK_42.mapstat	DTU_2025_1036883_101_MG_LVK_43.mapstat	DTU_2025_1036884_101_MG_LVK_48.mapstat	DTU_2025_1036884_102_MG_LVK_48.mapstat	DTU_2025_1036885_101_MG_LVK_52.mapstat	DTU_2025_1036887_101_MG_LVK_60.mapstat	DTU_2025_1036887_102_MG_LVK_60.mapstat	DTU_2025_1036888_101_MG_LVK_61.mapstat	DTU_2025_1036889_101_MG_LVK_74.mapstat	DTU_2025_1036890_101_MG_LVK_76.mapstat	DTU_2025_1036891_101_MG_LVK_79.mapstat	DTU_2025_1036892_101_MG_LVK_80.mapstat	DTU_2025_1036893_101_MG_LVK_82.mapstat	DTU_2025_1036894_101_MG_LVK_83.mapstat	DTU_2025_1036894_102_MG_LVK_83.mapstat	DTU_2025_1036895_101_MG_LVK_88.mapstat	DTU_2025_1036896_101_MG_LVK_94.mapstat	DTU_2025_1036897_101_MG_LVK_97.mapstat	DTU_2025_1036898_101_MG_LVK_98.mapstat	DTU_2025_1036899_101_MG_LVK_101.mapstat	DTU_2025_1036900_101_MG_LVK_102.mapstat	DTU_2025_1036901_101_MG_LVK_103.mapstat	DTU_2025_1037643_100_MG_LVK_8.mapstat	DTU_2025_1037644_100_MG_LVK_18.mapstat
Absicoccus porci	0.00117297	0.00287349	0.000703622	0.0027203	0.000608163	0.00066473	0.00132399	0.00123285	0.00107346	0.000623483	0.000236507	0.000659452	0.000437804	0.000645062	0.00208132	0.000637848	0.000223718	0.000699338	0.00232679	0.00165091	0.000210489	0.00400193	9.3e-05														0.000167723				0.000196948				0.000108224			3.86e-05	0.00070703
Abyssisolibacter fermentans						4.52e-06						1.74e-06
Acetanaerobacterium elongatum			1.36e-05	1.79e-05			6.34e-06	1.59e-05		1.07e-05	1.1e-05		8.93e-06	6.17e-05	2.21e-05	9.87e-06	1.23e-05		1.21e-05		2.72e-05							5.5e-05																0.000154508					1.11e-05
Acetatifactor muris				1.76e-05		4.88e-05	2.06e-06										2.13e-05			2.33e-06
Acetitomaculum ruminis			4.67e-06		5.92e-06									0.000646322					8.66e-06									1.49e-05
Acetivibrio ethanolgignens	0.000410212	0.000175236	0.000194942	0.000238487	0.000496512	0.000245607	0.000171294	0.000371817	0.000355864	0.000262297	0.000213634	0.00013495	0.000193944	0.000518704	0.000378459	0.000183739	0.000143214	0.000229342	0.000216708	0.000145344	0.000168607	0.000137432	0.000107151	0.000278989	8.63e-05	0.000282217		0.000312384	0.000416959	6.62e-05	0.000222198		0.000188564	0.000362216				0.000435923	0.000118826	0.000574826		0.000735083	0.000475275		0.000172294	0.000277003		1.98e-05	0.00012757
Acetivibrio mesophilus	3.8e-06	3.36e-05	4.36e-05	1.15e-05	7.18e-05	5.72e-06		2.03e-05	3.53e-05	3.89e-05	3.76e-05	4.95e-06	1.37e-05	8.48e-06			3.91e-05			5.47e-06	5.97e-05	2.78e-05		7.27e-05				1.37e-05						0.000195449							9.55e-05							6.85e-06
Acetoanaerobium pronyense	1.61e-05	2.14e-06					5.66e-05
Acetobacter sacchari		5.23e-07
Acetobacteroides hydrogenigenes		5.91e-05	2.99e-05	1.32e-05	3.74e-05	4.34e-05		1.41e-05		8.86e-05	1.46e-05	1.14e-05			4.27e-05	3.61e-05	1.74e-05		2.15e-05	1.39e-05	8.74e-05	2.6e-05																											0.000119407
Achromobacter xylosoxidans							4.47e-05				0.000147626	0.00030314	0.000161047						0.000196041	9.7e-05																												5.41e-05
Acidaminococcus massiliensis																						1.99e-06
Acidaminococcus timonensis
Acidibacillus sulfuroxidans	3.9e-06
Acidipropionibacterium thoenii							7.37e-05
Acidovorax cavernicola																		1.29e-06
Acinetobacter albensis											0.000118039	0.000107123							8.88e-05
Acinetobacter apis							3.42e-05
Acinetobacter baretiae						5.64e-05
Acinetobacter baumannii	1.66e-05	4.32e-05		1.72e-05		0.000271853	6.62e-05		1.99e-05	5.98e-06	0.000268979	0.000900775	0.000130567	2.17e-05	5.3e-05	2.82e-05	0.000113478	4.13e-05	0.000158155	0.000130908		0.000214909	9.67e-05							0.000981311					0.00250608	0.000508809	0.000973707		0.000273643			0.0030443		0.000715484			0.000681333	0.000123309
Acinetobacter celticus						5.38e-05	1.79e-05				0.000276031	9.44e-05	0.000156773						6.46e-05	1.55e-05		4.34e-05														0.000331512
Acinetobacter chengduensis	6.39e-05	2.73e-05		2.22e-05		0.000224802	0.00012544		1.03e-05		0.000283116	0.000746797	0.000107545	3.18e-05		1.18e-05	7.17e-05		0.000374083	0.000167117		0.000184056													0.00094399									0.000699969			2.14e-05	0.000369765
Acinetobacter chinensis	1.82e-05	5.82e-06				0.000376503					5.99e-05	7.36e-05	2.57e-05				7.73e-06		2.97e-05	2.74e-05		2.26e-05								0.000261651						0.000138829								4.75e-05			0.000819786
Acinetobacter cumulans						0.000431075	0.000175916		2.77e-05		0.0024497	0.000507741	0.000204652		0.000150084	4.73e-06	0.000218028		0.0026647	0.000254419		0.000681916	7.34e-05																									0.000299315	0.000154203
Acinetobacter defluvii	2.45e-05					5.7e-05	4.76e-05				4.12e-05		0.000281113				1.66e-05		1.7e-05	2.89e-05		1.28e-05	0.000229874																4.6e-05								0.000168355
Acinetobacter gandensis		8.69e-05		2e-05		0.00158049	0.000887126				0.00373975	0.0076264	0.00172691		3.29e-05	6.69e-05	0.000414243	4.1e-05	0.00459943	0.000698017		0.000852296								0.00023695																		0.000994402
Acinetobacter geminorum							2.12e-05				0.000109538	9.86e-05	8.03e-05				7.39e-05		0.000457564	4.86e-05		7.93e-05																										4.96e-05
Acinetobacter gerneri	7.63e-05	2.2e-05	1.21e-05	1.65e-05		0.000287381	7.22e-05			2.67e-05	0.000784003	0.000402977	0.000257451	8.46e-06	9.08e-05	5.87e-05	4.31e-05	1.61e-05	0.000362692	0.000117943		0.000181232	8.21e-05		0.000238589					0.000457364					0.000400382	0.000829355	0.00048538							0.000759272	0.000677329		0.000336833	0.000128454
Acinetobacter guerrae						2.83e-06					6.49e-06								6.01e-05			2.86e-06
Acinetobacter gyllenbergii		4.74e-06				1.02e-05	5.05e-06				2.27e-05	3.47e-05	3.07e-05						4.24e-05	1.07e-05		3.41e-05																											6.49e-06
Acinetobacter haemolyticus	6.12e-05	3.37e-05		1.19e-05		0.00015171	0.00016113				0.000364236	0.000656015	0.000145425		5.96e-06	2.49e-05	5.58e-05		0.000741619	7.79e-05		0.000329593	0.000462987							0.000432772						0.000792322					0.000768501			0.000605913				1.73e-05
Acinetobacter harbinensis											0.000598995
Acinetobacter indicus		1.03e-05				0.000180783	5.55e-05				0.00041591	0.000560482	0.000249968		1.78e-05		0.00011234		0.00102301	4.23e-05		0.000383115								0.000370514					0.000140458	0.000395013	0.000145217					0.000803659		0.000769358			0.000387047	4.41e-05
Acinetobacter johnsonii	0.00017816	7.02e-05				0.000317806	0.000276562				0.000543765	0.00137986	0.000629015	2.05e-05	3.38e-05	3.29e-05	0.000102512		0.000738624	0.000449016		0.000377519								0.000208663					0.000153861	0.00131824						0.000207928		0.00214352	0.0005607		0.000676232	0.0009259
Acinetobacter junii						2.6e-05
Acinetobacter kanungonis						2.6e-06						3.05e-05								4.72e-06		1.66e-06																										9.09e-06
Acinetobacter kookii						0.000142344	9.85e-05				0.00060789	0.00160469	0.000467653				8.37e-05		0.000576995	0.00038491		0.000846606																										0.000104347
Acinetobacter kyonggiensis	3.3e-05	1.9e-05				0.000103912	3.42e-06				6.22e-05	8.47e-05	4.81e-05				7.09e-05		0.000155639	1.74e-05			0.000114775
Acinetobacter lwoffii	3.67e-05	6.47e-05		3.77e-05	1.62e-05	0.000323143	4.17e-05			1.09e-05	0.000357732	0.00018469	0.000139987	7.55e-06	3.66e-05	3.71e-05	6.5e-05		0.000145899	9.21e-05		0.000125699		0.000278265						0.000271353					0.000688497	0.000413845	0.000358917							0.000623466			0.0013466	4.58e-05
Acinetobacter marinus							1.4e-05			6.83e-06	6.71e-06		4.88e-06																								0.000497812
Acinetobacter modestus											7.82e-05																																				0.000236162
Acinetobacter nosocomialis													5.09e-05
Acinetobacter piscicola	9.6e-05	2.63e-05		2.33e-05		8.03e-05	5.13e-05				0.00213546	0.00288861	0.000205835				7e-05		0.0008365	0.00022465		6.47e-05													0.000538291									0.000956863	0.000590406			0.000147195
Acinetobacter pittii	0.000407479			6e-06		0.000320721					4.19e-05	0.000248353	5.01e-05			8.5e-06	2.51e-05		0.00141834	0.000106483		0.000267354	4.55e-05							0.000134575						0.000333235								0.000400605				3.49e-05
Acinetobacter portensis							5e-05
Acinetobacter pragensis						3.17e-05					6.27e-05		8.08e-05						0.000365395			9.65e-05
Acinetobacter pseudolwoffii	0.00168528	0.00521265	7.24e-06	1.72e-05		0.0524414	0.00235629	2.22e-05		4.97e-06	0.0742577	0.00322508	0.00558283		0.0010772	0.00517234	0.00369183		0.00212701	0.00126857		0.0201051								0.0123515					0.000486543		0.000390319		0.000276858			0.000782848		0.00474377			0.00102284	3.36e-05
Acinetobacter radioresistens		9e-06				7.15e-05	6.42e-06				0.000184743	1.03e-05	3.8e-05			1.83e-05	1.96e-05					7.38e-05								8.98e-05							0.000240922
Acinetobacter rongchengensis	4.46e-05	3.32e-05	1.71e-05	9.33e-06		0.000214701	0.000112752			1.14e-05	0.000398986	0.000706095	0.000277245	9.77e-06	1.99e-05	1.08e-05	6.74e-05	1.22e-05	0.000469125	0.000108214		0.000271487	7.54e-05	6.23e-05	0.000166501					0.00011349					0.000507663	0.000592902	0.000345699		5.35e-05			0.000858116		0.00230087	0.00036248		0.000421255	0.000239519	3.47e-05
Acinetobacter rudis							0.00160637
Acinetobacter schindleri	0.000303013	2.06e-05		5.56e-05		0.000132625	3.35e-05			1.12e-05	0.000110968	0.000301505	0.000232959	1.81e-05	3.14e-05	2.04e-05	6.04e-05	3.87e-05	0.000281597	0.000102315		0.000124927	0.00018145												0.000789908				0.000220298					0.00186854	0.000561746		0.000635059	5.95e-05
Acinetobacter seifertii	3.22e-05	1.49e-05		1.59e-05		0.000430406	2.68e-05			1.77e-05	0.000571479	0.000187904	9.48e-05		8.58e-06	1.98e-05	2.37e-05		0.000209972	7.53e-05		0.000100377								0.000243259					0.00083045	0.000441748								0.00029965				0.000115644
Acinetobacter sichuanensis	0.000106518	3.44e-05		1.29e-05		0.000148219	3.28e-05	2.27e-05	1.65e-05	2.52e-05	0.000240808	0.000669388	9.53e-05	9.57e-06	2.69e-05	3.12e-05	8.13e-05	1.07e-05	0.00042434	5.31e-05		0.000164616	8.22e-05							0.000157858					0.00103028	0.000750754	0.0013495					0.00150054		0.00269187	0.000193662		0.00158698	0.000247722
Acinetobacter soli		2.69e-05		1.07e-05		0.00199647	9.85e-06		2.34e-05		0.00146211		0.000979956			4.5e-05	6.84e-05		0.000183728	1.17e-05		9.07e-05
Acinetobacter sp. 10FS3-1		0.000152995				7.47e-05	0.000103157				0.00106401	0.00142341	0.000344027				8.3e-05		0.000265834	0.000131071		0.000143101													0.000794228													0.000139659	4.27e-05
Acinetobacter sp. ACNIH1		2.59e-05									3.86e-05						1.95e-05
Acinetobacter sp. F9						0.111721					0.187247											0.040372
Acinetobacter sp. FDAARGOS_724				8.44e-06		1.72e-05											1.84e-05
Acinetobacter sp. NEB 394				3.12e-05		0.00016328	4.91e-05				0.000661788	0.000629822	0.00012662		1.39e-05		1.94e-05		0.000565385	0.000149533		0.000306799													0.00066241	0.00078704												0.000115757
Acinetobacter sp. NEB149						8.76e-05
Acinetobacter sp. SH20PTE14	3.07e-05	0.000138344		0.000199978		0.000514779	0.000278942				0.00259474	0.0213188	0.000371958		9.72e-05	3.49e-05	0.000240468	4.99e-05	0.00200512	0.000699377		0.000426841								0.000176388					0.00244638	0.00505685	0.000913101		0.000307213			0.00129139		0.00525502			0.00176859	0.000190541
Acinetobacter sp. TGL-Y2											4.84e-05
Acinetobacter sp. WCHA45	3.23e-05	7.38e-06				0.000137832	8.25e-05				0.000269187	0.000871014	0.000314662			1.53e-05	8.72e-05		0.000554579	0.000166947		0.000381836																										5.6e-05
Acinetobacter sp. WCHA55											6.86e-05	0.000216622
Acinetobacter sp. WCHAc010034		3.24e-05				0.000197026	4.28e-05				0.000121015	0.000874973	0.000245086				3.91e-05		0.000149556	7.69e-05		0.000115262								0.000290548						0.00071332	0.000220773					0.00117258		0.000346696				0.000132501
Acinetobacter sp. WCHAc010052						0.000309172	7.09e-05				0.000235774	0.00076443	4.3e-05				0.000126218		0.00026994	0.000103788		0.000156232
Acinetobacter sp. WY4						0.000701239					0.00124123
Acinetobacter sp. YH12138	0.000156129	7.52e-06				0.00115123	0.00117465		4.65e-05		0.0438644	0.066923	0.00223924			1.77e-05			0.0226063	0.00136002		0.0011744								0.000388548																		0.00491941
Acinetobacter stercoris		6.88e-06				2.41e-05					3.17e-05	1.59e-05	4.13e-05	4.67e-06	1.72e-05		4.61e-05		5.07e-05			5.49e-05								6.34e-05							0.000135893					0.000236715					0.000303358
Acinetobacter terrae		8.29e-05				0.00025369					0.00032488					6.64e-05						4.82e-06
Acinetobacter terrestris						3.04e-05					0.000755325					0.000261157
Acinetobacter tianfuensis	8.34e-05	3.32e-05	2.54e-05	4.78e-05	2.46e-05	0.000281101	0.00016951	2.33e-05	4.33e-06	2.66e-06	0.000521468	0.00113925	0.000385248	3.2e-06	2.24e-05	3e-05	0.000272364	2.64e-05	0.000862508	0.000201977		0.000317069								0.00020998						0.000861909	0.000129892							0.000812079			0.000147952	0.000122827
Acinetobacter tjernbergiae											3.17e-05	0.000851005	1.49e-06				1.18e-06		1.38e-05			1.24e-05														0.00165997	0.000488595
Acinetobacter towneri		1.31e-05				0.000261579	0.000124883				0.000460363	0.00757644	0.000144303			4.99e-05			0.000409726	0.000193665		0.000506188													0.000320017	0.000868224												8.24e-05
Acinetobacter ursingii			1.68e-05	2.33e-05		6.35e-05	0.000144798	2.23e-05			2.78e-05	3.68e-05	0.000366457	8.7e-06	1.28e-05			1.25e-05	0.000314878	0.000340289		0.000314019
Acinetobacter variabilis	0.00336531	0.000369089		0.000547196		0.000328753	1.16e-05				0.000202193	0.000860928					5.22e-05		0.0040216			0.000589862																									0.000191446
Acinetobacter wuhouensis	4.74e-05	1.45e-05				0.000187707	0.000133958				0.000420333	0.00116824	0.000151425		2.69e-05		0.000172392		0.000404062	0.000222179		0.000119087	0.00015565							4.7e-05					0.000324005	0.000591294	0.000587514					0.000824379		0.000633213			0.000225533	0.000550125
Actibacterium ureilyticum							1.39e-05
Actinobacillus indolicus										2.38e-05
Actinobacillus minor	6.83e-06			6.14e-06			2.26e-05	3.55e-05	1.02e-05		7.28e-06	3.73e-06	8.45e-06	6.41e-06					0.00010216	8.79e-06	9.35e-06			0.000233302						2.8e-06																0.000346323
Actinobacillus pleuropneumoniae	0.000109144	0.00014043				3.76e-05	2.15e-05			1.28e-05					8.5e-06				3.89e-05	1.35e-05							0.00247595																			0.00136467			1.03e-05
Actinobacillus porcinus											0.000254344
Actinokineospora fastidiosa										7.38e-06
Actinomyces denticolens														0.00127765
Actinomyces haliotis																				4.2e-06
Actinomyces minihominis		1.37e-05					0.000317706
Actinomyces urogenitalis							9.63e-06					1.57e-05
Actinotignum timonense																				7.07e-06
Acuticoccus kandeliae			1.33e-06									8.3e-07
Adlercreutzia mucosicola																			6.32e-06			8.07e-06
Adlercreutzia muris	2.74e-05	7.83e-06		9.2e-06									8.7e-06	1.08e-05		1.46e-05			1.93e-05		2e-05
Advenella alkanexedens						2.28e-05							0.00328405						0.00118243			2.72e-05								2.48e-05														0.000405324				0.000773857
Advenella faeciporci							2.7e-05						0.00148483	3.07e-06				3.05e-06	0.000470026			1.65e-05															0.000143824							0.000437785				0.000195961
Aequorivita antarctica									1.99e-06
Aequorivita lutea																				2.24e-06																							6.1e-05
Aequorivita sinensis		5.18e-05				1.45e-05																								2.41e-05
Aerococcus suis	0.000465003	0.000123954	0.000776375	2.59e-05		0.00111336	4.34e-05			3.45e-05	0.000190027	0.000513903	0.000112106	0.000275808	0.000148617	0.000385954	4.78e-05	8.83e-05	9.93e-05	0.000668728	0.000446057	0.00122497	0.000270961	0.000714522						0.000483647					0.00067249				0.000386925						0.000485152			5.84e-05	4.98e-05
Aerococcus urinaeequi	0.129935	0.0355107		0.0136989		0.0477716	0.0273071			0.0046037	0.0225918	0.0402023	0.0176754	0.0369681	0.0187247	0.0259675	0.0159149	0.0278134	0.00630246	0.0790359	0.0764396	0.00766792	0.0186828	0.0108875						0.0035961														0.000903168				0.0399048	0.0261468
Aerococcus viridans	0.170701	0.0212204	0.0295911	0.0188808		0.203595	0.0349537			0.00519221	0.023821	0.511939	0.0259057	0.25624	0.137579	0.276866	0.022749	0.124227		0.710087	0.0892553	0.0449559																							0.113577			0.0368695
Aeromonas hydrophila																																					0.000861016
Aestuariicella hydrocarbonica		3.38e-06
Aestuariimicrobium ganziense						3.37e-05
Agathobacter ruminis	1.08e-05	3.81e-05	6.63e-05	2.18e-05	0.000166439	4.53e-06		3.44e-05	2.76e-05	3.15e-05	4.88e-05	6.41e-06	2.61e-05	1.05e-05	4.67e-05	5.69e-05	3.21e-05		8.63e-06	5.34e-05	8.26e-05	4.79e-06						8.96e-05																					2.19e-05
Agathobaculum butyriciproducens	3.69e-05	0.000836549	0.00346299	6.4e-05	0.00311979	0.000359095	5e-05	0.000149253	0.00292048	0.00117982	0.00116831	0.000637556	0.000123793	0.000297987	0.000682896	0.00164532	0.00040998	0.000118486	0.000544336	0.000162511	0.00039764	0.000216623				0.000489043		0.00076951					0.000456304						0.000225832						0.000332301			1.1e-05	0.000636311
Agathobaculum desmolans	0.000430326	0.000221782	0.000203432	6.93e-05	0.00018929	0.000320106	0.000228033	0.000230992	0.000294187	0.000162692	0.000140656	0.000263977	0.000206151	0.000917983	0.000621694	0.000120845	0.000110331	0.000258427	0.000146226	0.000203388	0.000107898	9.62e-05						0.000187486																				4.46e-05	9.44e-05
Agrilactobacillus composti		8.96e-06		9.59e-05			1.39e-05	1.41e-05	1.91e-05	4.57e-06			4.19e-05	7.47e-05	0.000107607	3.58e-05	8.63e-06		1.08e-05	0.000254738	9.74e-05	4.39e-05				7.42e-05													8.62e-05	0.000170925						0.000147763		4.3e-05	2.73e-05
Agrilactobacillus yilanensis	0.00468147	0.000776605	9.22e-05	0.000597532	1.62e-05	0.00168902	0.00126096	0.000264216	7.31e-05	0.000171778	0.0008519	0.00182416	0.000486891	0.00182171	0.000332782	0.00131318	0.000322193	0.000258625	0.00018422	0.0024321	0.00159814	0.000708977	0.0061149	0.00239958	0.00408461	0.00143559				0.00098893					0.000859361	0.00738284	0.000844833	0.00704568	0.00168052	0.00294347	0.00157155	0.00127067		0.000656284	0.009636	0.00206405	0.00282967	7.6e-05	0.00088912
Agrobacterium rosae																	1.43e-05
Agrococcus casei	0.000218567														0.000112497				0.000150642			6.77e-05	2.13e-05																									0.000169075
Agromyces italicus	6.62e-06
Alcaligenes pakistanensis						4.19e-06													8.8e-06																													0.00224686
Alcanivorax profundi	7.31e-06	9.32e-06	1.05e-05	5.72e-06	2.49e-05	1.22e-05	4.86e-06	9.37e-06	1.72e-05	2.34e-05	1.55e-05	9.49e-06	1.1e-05	8.61e-06	8.78e-06	1.42e-05	7.5e-06	4.98e-06	8.63e-06	3.77e-06	1.68e-05	4.68e-06	1.09e-05	4.77e-05				2.69e-05	3.09e-05	4.4e-05	1.42e-05		1.48e-05	6.06e-05	4.92e-05			7.26e-05	3.5e-05							7.87e-05		7.06e-06	2.76e-05
Algoriella xinjiangensis			5.01e-06	9.19e-06			2.83e-05	1.2e-05		2.09e-06	2.53e-05	9.45e-05	3.19e-05		7.65e-06		0.000193013	1.29e-05	0.000168969	2.7e-05		1.55e-05														6.71e-05			3.47e-05									1.1e-05
Algoriphagus aestuarii											1.51e-06	7.56e-07																																				2.56e-06
Algoriphagus oliviformis														3.4e-06			2.92e-06																																4.51e-06
Aliiruegeria sabulilitoris																																																	1.29e-06
Aliivibrio logei												7.01e-07							4.09e-06																		3.22e-05
Alishewanella longhuensis	9.67e-06	1.98e-05	7.94e-06	6.3e-06	2.91e-05	5.97e-06		7.34e-06	7.49e-06	2.08e-05	3.82e-06	2.96e-06	1.91e-06	1.45e-05	5.35e-06	6.99e-06	4.75e-06	2.93e-06		5.34e-06	5.97e-05	4.84e-06						2.51e-05																					3.46e-05
Alistipes finegoldii	1.66e-05													0.00146119	8.12e-06		0.002451
Alistipes ihumii		4.55e-06	3.14e-06					1.27e-05	3.32e-06	4.43e-06	1.53e-06		4.13e-06	2.77e-06	6.61e-06	1.68e-06	1.33e-06					1.55e-06													7.69e-05														1.32e-05
Alistipes onderdonkii							0.0215266
Alistipes shahii	0.000268517	2.65e-05	4.07e-05	0.000938823	8.95e-05	1.43e-05	0.000217022	0.000113425	2.91e-05	5.15e-05	2.94e-05	2.06e-05	6.66e-05	3.56e-05	2.4e-05	1.62e-05	2.92e-05	2.87e-05	3.58e-05	1.4e-05	5.68e-05	2e-05	1.81e-05					0.000117554			3.24e-05								3.61e-05									9.83e-06	3.91e-05
Alkalibacterium gilvum	0.000320821	0.000171716	1.67e-05	0.000475661		0.000903306	3.87e-05		4.89e-06	2.19e-06	0.000339867	0.00014269	7.79e-05	8.46e-06	9.55e-06	0.000697026	3.36e-05	4.38e-06	3.12e-05	0.000104859	1.47e-05	0.000134649	0.000863326	0.00170458	0.000375906					0.000516582					0.000429082	0.000550767	0.000352487				0.000787505			0.000183679	0.000212921	0.00026746	0.000718138	6.99e-05	0.000107856
Alkalibacterium kapii	2.26e-05	7.53e-06			7.56e-06	0.000125153					8.36e-05	2.74e-05	2.8e-05	5e-06		0.000385954	4.42e-06			3.98e-06		1.83e-05								4.9e-05																		1.66e-05
Alkalibacterium olivapovliticus	2.92e-05	9.31e-06	1.37e-05			0.000334337	3.27e-06				0.000174847	0.000117369	1.07e-05	2.09e-05	3.38e-05	0.000223328	9.2e-06	5.01e-05		5.34e-05	6.08e-06	8.92e-05								0.000243185															5.93e-05		0.000490161	1.49e-05
Alkalibacterium pelagium	0.00022798	2.08e-05		6.07e-06		0.000430294	0.0001781			3.76e-05	0.000549112	0.000376008	0.000340542	2.27e-05	5.28e-05	0.000771942	0.000261446	8.83e-06	8.01e-05	0.000841849	2.88e-05	0.000452319	5.93e-05							0.00027043				0.000268006	0.000311931		0.000253675								0.000159804			0.00024993
Alkalibacterium putridalgicola	4.17e-06	4.23e-06				0.000166021					6.39e-05	1.85e-05		7.02e-06	1.39e-05	9.64e-05		1.15e-05		9.19e-05	4.86e-06	1.66e-05																										8.7e-06
Alkalibacterium subtropicum			8.82e-06						2.28e-06		5.73e-06										5.44e-06
Alkalibacterium thalassium	0.000202746	4.31e-05	2.91e-05			0.000155097	1.07e-05			5.97e-06	8.95e-05	4.76e-05	1.33e-05	2.07e-05	4.18e-05	0.000110827	5.55e-05	0.000228717	1.17e-05	8.1e-05	0.00032834	0.000175619	0.000176007	0.000984755											0.000604366								0.000872972	0.000778117	0.000346277		0.000476967	4.46e-05	2.9e-05
Alkalibaculum bacchi	0.0136108	0.00129872		0.000878153		0.00115019	0.00214165		3.02e-06		0.00101803	0.00113362	0.00157452			0.00114768	0.000587013		0.00134002	0.000529123		0.00197052	0.00599851																									0.00116496
Alkalibaculum sporogenes																						5.26e-06
Alkalihalobacillus akibai																			4.55e-06	3.46e-06
Alkalihalobacillus bogoriensis																																																6.2e-05
Alkalihalobacillus krulwichiae								2.46e-06
Alkaliphilus hydrothermalis																			4.97e-06		6.11e-06
Alkaliphilus transvaalensis										4.46e-06
Alkalispirochaeta alkalica																				2.83e-06
Alkanindiges hydrocarboniclasticus		2.3e-05				0.000464989	2.15e-05				5.64e-05					5.69e-06	2.08e-05					9.36e-05								0.000150527
Allisonella histaminiformans						3.03e-05			7.5e-06	0.000161346	0.000155221	2.12e-05				2.67e-05	4.01e-06		3.57e-05		6.71e-06	0.000135645																										1.78e-05
Allobacillus halotolerans										1.92e-06																		7.42e-05			2.62e-05
Allofustis seminis					3.27e-05	0.000118133					5.46e-05	4.68e-05				8.63e-05						3.89e-05																										2.25e-05
Alloprevotella rava	5.98e-05	0.000274817	0.0005094	0.000177675	0.00101472	4.64e-05	6.73e-05	0.00078059	0.000779005	0.000414264	0.000247756	0.000324693	0.000367155	0.000301018	0.000517491	0.000293818	0.000370098	5.85e-05	0.000225371	0.00012102	0.000489411	9.36e-05	9.59e-05					0.000301827			9.49e-05				0.000285235					0.000432902								1.92e-05	0.000216227
Alloscardovia macacae		0.000193696					0.000142688						1.76e-05																																				2.64e-05
Alloscardovia omnicolens	1.33e-05			2.32e-05			1.2e-05	2.86e-05																0.000288007
Allosediminivita pacifica		3.36e-06
Alteribacter natronophilus	4.22e-05	1.19e-05	5.42e-05	2.55e-05	8.48e-05	7.58e-06	3.3e-06	2.44e-05	6.45e-06	5.25e-05	9.34e-06	4.03e-06	1.36e-05	2.26e-05	9.99e-06	1.66e-06	6.07e-06	5.05e-06	1.33e-05	2.11e-06	2.87e-06	1.61e-06	1.51e-05	4.51e-05		2.72e-05		6.9e-06																				5.14e-06	3.77e-06
Amedibacillus dolichus																7.29e-06
Aminicella lysinilytica		1.61e-05		4.68e-06													3.78e-06		7.15e-05		1.43e-05	6.45e-05																											4.49e-06
Amniculibacterium aquaticum	8.75e-06	3.25e-06				4.25e-06	1.14e-05					4.41e-06	6.51e-06						4.51e-06			1.21e-05																						8.3e-05
Amphritea spongicola							5.95e-07															5.71e-07
Amycolatopsis rifamycinica		3.22e-06					2.66e-06					1.65e-06	1.43e-06		1.12e-05	4.78e-06		2.33e-06	4.16e-06	1.47e-06		3.23e-05
Amylolactobacillus amylophilus		0.146284		0.0507462			0.0484847	0.0185827		0.0892944		0.0508351					0.125701	0.0298058	0.00762725	0.16834	0.0324647																											0.04283	0.15452
Amylolactobacillus amylotrophicus	0.00188191	0.00508401	2.65e-05	0.00256533	0.000100487	0.0257292	0.00265548	0.00104258	0.00046375	0.00940075	0.00165766	0.00156134	0.00121211	0.00211722	0.00115126	0.0085923	0.0154044	0.000839579	0.000354854	0.0119572	0.00299102	0.000556208	0.00340873	0.00219033	0.000737045	0.00051533				0.0170236	0.000724264	0.000442218		0.00116657	0.00657359		0.00364094	0.00278842	0.000324099	0.000811205	0.00797496	0.000567952	0.00142398		0.00415846	0.00455174	0.000799505	0.00268505	0.00892256
Anaerobacterium chartisolvens	1.54e-05	4.52e-05	5.56e-05	3.42e-05	9.77e-06	2.96e-05	1.02e-05		9.38e-05	0.000102646	7.27e-05	2.48e-05	4.82e-05	7.47e-05	4.39e-05	3.91e-05	3.13e-05	9e-06	3.22e-05	4.57e-05	6.96e-05	7.08e-05	4.79e-05		9.17e-05														5.54e-05										4.03e-05
Anaerobiospirillum succiniciproducens											8.88e-06							5.51e-06
Anaerobium acetethylicum	0.0003454	0.000191895	2.23e-05		0.000149341	4.23e-05	1.74e-05			3.92e-05		1.06e-05	3.36e-05	1.94e-05	2.19e-05	6.96e-05	0.000658762		0.00191179	1.98e-05	3.77e-05	3.49e-05																						0.000104173				3.97e-05	6.63e-05
Anaerobutyricum hallii			8.75e-06	4.34e-06	0.00541589	9.55e-06	1.16e-05	7.15e-05	0.0109379	4.49e-06	0.00015208	4.76e-05	4.44e-05	0.000143802	0.000282708	1.83e-05	1.21e-05	6.49e-05	5.01e-05	5.08e-05	2.45e-05	2.02e-05						4.61e-05	0.000363751	3.03e-05																		1.39e-05
Anaerobutyricum soehngenii	0.000524429	0.000844383	0.00186972	0.00116807	0.00102067	0.00101732	0.000983581	0.00293605	0.00144527	0.00109388	0.000912025	0.00120486	0.00089449	0.00483944	0.00328829	0.000979261	0.000798735	0.00064214	0.000831282	0.0014027	0.00106239	0.000891558	0.000476724	0.000151179	0.000624726	0.000507655	0.00162326	0.00102901	0.000605856	0.000353705	0.00106175	0.000684372	0.00143172	0.000943688		0.000152953	0.000137715	0.000303053	0.000594984	0.00231686	0.000270948	0.000250284	0.000734376	0.00109829	7.77e-05	0.000286264	0.000392667	0.000423334	0.000420504
Anaerococcus degeneri		2.14e-05
Anaerococcus faecalis	0.000419448	0.000457064	0.000120751	6.21e-05			0.00024259					0.000282236	5.21e-06		8.88e-06				9.64e-05	0.000238501	2.49e-06			0.000506959																					0.000241968
Anaerococcus lactolyticus		3.41e-05	4.42e-05									1.54e-05		2.12e-05	9.96e-06							2.56e-05																										1.41e-05
Anaerococcus porci	0.000571955	0.000173771	8.97e-05	8.31e-05		5.89e-05						0.000111888	0.000111948									0.000315361	0.000332143
Anaerococcus senegalensis	2.99e-05	4.3e-05		1.14e-05															1.83e-05	1.56e-05	3.03e-06		9.03e-05	0.000264506																									3.85e-05
Anaerococcus tetradius		1.78e-05	1.4e-05				6.5e-06					4.17e-05							2.69e-06	0.000104
Anaerocolumna aminovalerica				2.3e-06										8.42e-06							5.73e-06	5.6e-06
Anaerocolumna jejuensis		1.89e-06	4.23e-06						1.84e-06			1.99e-06							2.58e-06																										4.49e-05
Anaerocolumna xylanovorans			3.6e-06	6.98e-07					1.7e-06				2.51e-06	2.28e-06	2.84e-06					1.97e-06
Anaerofustis stercorihominis	0.00348041			0.00201509			0.00306039
Anaerolactibacter massiliensis	0.00941237													0.0117781								0.00563834
Anaeroplasma bactoclasticum											4.36e-05					1.03e-05
Anaerosacchariphilus polymeriproducens		1.14e-05							4.97e-05					1.31e-05	5.66e-06	8.1e-06	1.66e-05		3.77e-05			1.36e-05						1.97e-05
Anaerosalibacter bizertensis												8.92e-06										6.14e-06	5.32e-05
Anaerosolibacter carboniphilus																						2.07e-06
Anaerosphaera aminiphila	0.000879279	0.000206463		0.000349254		0.000126505	7.41e-05					0.000645072	0.000449718						1.55e-05	5.06e-06		6.15e-05	0.0011708														0.00114786												0.000717387
Anaerosphaera multitolerans	0.00095792	0.0006974	0.000109114	0.000475832		0.000270725	0.000277543				0.00012788	0.000134563	0.000183232	6.15e-05		0.000956665	0.000150936	1.85e-05	0.000110918	0.000757429	7.74e-05	0.000711427	0.00087498	0.000599582						0.000478722																	0.000357603	0.000169425	0.000178583
Anaerosporobacter mobilis													0.000692068
Anaerosporomusa subterranea													7e-06
Anaerostipes butyraticus			9.59e-06							2.45e-06			1.45e-05	1.16e-06		3.37e-06	5.98e-06	1.4e-05			2.07e-05	2.86e-06
Anaerostipes faecalis	0.000183756	0.000337448	0.000424843	0.000478551	0.000358487	0.000335231	9.31e-05	0.000484345	0.000479123	0.000414929	0.000203924	0.000219509	0.000291636	0.00085569	0.000948886	0.000702866	0.00014599	7.69e-05	0.000166055	0.000275286	0.000250787	0.000137258	0.000119872		0.000137898			0.000270653	8.02e-05			0.000869238						0.000309299	0.000899014						0.000217664			0.000611938	0.000127089
Anaerostipes hadrus									0.0226218	0.0116591
Anaerostipes hominis	1.14e-05	1.29e-05		1.37e-05	2.82e-05	4.85e-06		5.95e-05	1.36e-05	7.8e-06	8.99e-06	4.38e-06	7.05e-05	9.71e-05	0.000131113	2.9e-05	9.37e-06	2.4e-05	1.61e-05	3.7e-05	1.23e-05	3.13e-05											0.000111682					0.000204793		0.000266513									5.21e-06
Anaerotalea alkaliphila											1.93e-05	1.43e-05				2.66e-05			2.3e-05			3.63e-05
Anaerotignum faecicola				4.14e-05	7.13e-05			0.000110465		4.22e-05	1.13e-05						4.93e-05	2.66e-05
Anaerotignum lactatifermentans	5.99e-05	2.67e-06	5.15e-06	1.91e-05	7.74e-05			4.47e-05	9.94e-06	5.68e-06	1.56e-05		8.98e-06	1.3e-05	4.91e-05	2.39e-06		0.000149829	1.12e-05		4.52e-06		1.79e-05																										4.23e-06
Anaerotignum neopropionicum	5.44e-06				4.1e-06			3.06e-05			6.03e-06				2.11e-05	1.29e-06	9.59e-06			7.88e-06		2.58e-06
Anaerotruncus colihominis				1.87e-05							2.87e-05			4.16e-05					2.29e-05																														2.58e-05
Anaerotruncus rubiinfantis				6.33e-06
Anaerovibrio lipolyticus		7.12e-06	6.02e-06		6.44e-06					6.23e-06			2.6e-06	5.69e-06			4.51e-06	3.85e-06		5.28e-06
Anaerovibrio slackiae	0.000251746	0.000406852	0.00068347	0.000724445	4.73e-05	0.000584587	0.00053584	0.000106228	0.000217203	0.000311011	0.000287192	0.000792548	0.00108146	0.00048682	0.00079663	0.000141578	0.000279034	2.39e-05	0.000416995	0.000110168	0.000201893	0.000116713						3.58e-05						0.000168127					0.00315318						7.62e-05			0.000284892	0.000167967
Anaerovorax odorimutans	1.85e-05	5.76e-05	9.07e-05	3.25e-05	4.95e-05	8.57e-06		6.02e-05	5.05e-05	2.52e-05	2.61e-05	2.27e-05	4.51e-05	4.61e-05	0.000133301	5.01e-05	3.09e-05	1.3e-05	4.32e-05	1.75e-05	6.7e-05	2.91e-05								5.14e-05
Ancrocorticia populi	0.000343234	0.00113595		0.000110542			0.00149609					0.00151908	0.000909655					0.000488471		0.00231999
Ancylomarina longa				1.56e-06																		2.07e-06
Aneurinibacillus tyrosinisolvens													3.05e-06			4.23e-06
Angelakisella massiliensis	4.65e-05	8.46e-05	6.54e-05	5.18e-05	0.000182789	7.82e-05	6.93e-06	6.32e-05	9.88e-05	0.000144699	0.000101452	7.64e-05	5.63e-05	8.66e-05	8.07e-05	0.000134771	1.37e-05	1.88e-05	4.01e-05	4.29e-05	7.25e-05	3.73e-05						1.85e-05			3.13e-05																		5.25e-05
Anoxybacillus calidus																					1.22e-05
Anseongella ginsenosidimutans																	1.45e-05		1.65e-05
Apibacter adventoris																	3.69e-06
Aquirufa rosea																	5.5e-06
Arcanobacterium bovis																				7.84e-06																											0.000523026
Archangium violaceum																																											0.000143196
Arcticibacter svalbardensis																4.42e-06
Arenibacter lacus	2.41e-05		7.73e-06				1.09e-05		2.6e-05	6.03e-06		3.26e-06							9.2e-06	3.42e-06
Arenibacter latericius	4.8e-06
Arsenicicoccus bolidensis						3.18e-05
Arthrobacter silvisoli						1.26e-05
Arthrobacter ulcerisalmonis	0.000208982						4.25e-05
Asaccharospora irregularis	0.000203466	0.000105484	8.19e-05			6.5e-05	6.91e-05					1.44e-05	3.93e-05			0.000350427	5.29e-05		6.8e-05		4.58e-05	9.88e-05	9.43e-05	0.000670613																								0.000108015
Atopococcus tabaci		1.92e-05		2.84e-06		0.000101041	8.73e-06			8.45e-06	6.46e-05	3.45e-05	0.0001327		3.23e-06	6.17e-05	8.46e-05		8.76e-06	1.78e-05		5.86e-05																										4.16e-05	5.08e-06
Atopostipes suicloacalis	0.000286726	7.1e-05	0.000177468			0.000308588	0.000352131		2.23e-06		0.00018738	0.000395561	0.000283659		6.27e-05	0.000394302	0.00520101		3.01e-06	7.86e-05	0.000103614	0.00150154	0.00247249	0.00414211						0.000112315												0.00421651						7.46e-05	1.37e-05
Aurantiacibacter luteus																														1.07e-05
Auraticoccus cholistanensis	1e-05
Aureimonas psammosilenae	0.000527559	0.00268067	0.00295971			0.000938213	0.000676752	0.00013918	0.00354691	0.00066842	0.00151375	0.000358541	8.04e-05		3.89e-05	0.000247758		2.25e-05	5.23e-05	0.00102575	6.92e-05		0.000463754		0.000471771	0.00115926				0.000731385	0.000361465		0.00282662	0.0012686	0.00117207						0.000292687				0.00120569			0.000350842	0.000882102
Aureimonas pseudogalii		2.54e-05
Azonexus fungiphilus			3.48e-05	1.42e-05				1.2e-05	0.000108604			3.61e-05		0.000583414	0.000467418	8.72e-05						2.03e-05																	0.000301801
Azovibrio restrictus									4.12e-05			4.3e-06		4.54e-05	4.62e-05					7.35e-06
Bacilli bacterium	0.0124244	0.0133414	0.0166174	0.0169488		0.0135578	0.0212555	0.0143823	0.0107685					0.0213021				0.00667961
Bacilliculturomica massiliensis	2.69e-05	4.63e-05		3.56e-05	5.65e-05			1.89e-05		1.85e-05					5.69e-05	3.29e-05	2.18e-05				7.66e-05	2.2e-05
Bacillus cabrialesii							8.1e-07															1.42e-06
Bacillus cecembensis						1.87e-05					2.66e-05						2.54e-06			8.59e-06		5.02e-05
Bacillus cereus	4.86e-05																							0.00018867												0.000438418					0.000431472
Bacillus dielmonensis																						1.68e-06
Bacillus lacisalsi	3e-06	2.41e-06		3.8e-06
Bacillus massilionigeriensis																						1.19e-05
Bacillus mycoides										3.06e-06											4.25e-06
Bacillus ndiopicus											1.64e-05											4.7e-05
Bacteroidales bacterium		0.0210404	0.0363051		0.0208657	0.067865		0.0121328	0.0262364	0.0178843	0.033808	0.0295616	0.0141533		0.020682	0.0174827		0.0112029	0.023287		0.0259485	0.0103816																											0.0316543
Bacteroides acidifaciens	0.00131805	0.00221965	0.001781	0.000553971	0.00199218	0.00119157	8.13e-05	0.00211181	0.00216052	0.000633021	0.000929199	0.0014608	0.000943966	0.00181543	0.00165157	0.000945092	0.00183874	0.000777486	0.00140506	0.000539188	0.00172528	0.000982072	0.000417112			2.51e-05		0.00107595								3.09e-05					0.00113519							0.000148177	0.00223916
Bacteroides caccae							6.77e-06										2.31e-05	8.78e-06
Bacteroides caecicola		6.95e-06							1.28e-06	1.93e-05	5.07e-07	1.02e-06									3.39e-06
Bacteroides caecigallinarum			4.01e-06	5.02e-07				7.18e-06		3.43e-06	9.49e-07	9.7e-07	6.91e-07	1.3e-05	4.28e-06	7.66e-05	1.47e-06	1.12e-06	1.2e-05		8.05e-06	1.87e-06			1.71e-05						2.32e-05			1.73e-05
Bacteroides clarus										1.92e-05
Bacteroides congonensis							2.24e-06
Bacteroides coprosuis	0.0601556	0.0334075				0.0152853	0.0168639				0.0133332	0.0503646	0.125892				0.0938168		0.421861			0.111094																										0.0277419	0.0268909
Bacteroides cutis	1.47e-05	2.72e-05		9.04e-06			1.67e-05					7.02e-05	3.37e-05		5.62e-06				0.00013737	3.79e-06		6.35e-05																										3.87e-05	3.78e-05
Bacteroides eggerthii	1.57e-05	8.11e-05	2.47e-05	5.29e-06	0.000108459	3e-05	3.1e-05	7.31e-06	4.71e-05	0.000114415	0.000107515	0.000127344	6.21e-05	5.44e-06	2.77e-05	1.62e-05	3.38e-05		0.000264175	1.96e-05	0.000136158	4.65e-05						1.53e-05					6.9e-05						3.62e-05									0.000182956	4.97e-05
Bacteroides faecalis				3.7e-05														0.000976023
Bacteroides faecichinchillae			5.81e-06	3.97e-05	1.47e-05		6.33e-05	4.23e-05		6.51e-06		5.48e-06	8.41e-06		1.51e-05
Bacteroides finegoldii	6.78e-05	0.000182171	0.000130801	0.00018915	0.000415721	8.49e-05	0.000139317	4.07e-05	0.000180182		0.000204275	0.000137242		0.000292354	0.000161213		1.54e-05	0.000242513	1.39e-05	6.55e-05	0.000162877	3.54e-05								0.000145944						0.000179593						0.00103029	0.00180032	0.000370719					0.000258356
Bacteroides fluxus	5.03e-05	0.000107803	0.000121159	4.21e-05	0.000194208	8.14e-05	2.4e-05	6.22e-05	0.000232021	0.000146874	0.000196246	0.00133927	5.33e-05	0.00218636	0.00471323	0.0018574	4.52e-05	4.43e-05	0.000149231	6.59e-05	0.000421487	2.81e-05	2.22e-05		0.000368697			0.000131194			0.000706029	4.84e-05		0.000171528				0.000153637	0.000214439							0.00045283		6.12e-05	0.00018126
Bacteroides fragilis	7.96e-05		1.78e-05	0.000104058	0.000148173		4.63e-05						1.31e-05					0.617138
Bacteroides gallinaceum		1.26e-05	3.93e-05	1.5e-05	4.41e-05		9.53e-06		6.88e-05	4.21e-05	1.53e-05	7.02e-06	6.64e-06	6.49e-05	2.16e-05	7.62e-06	2.2e-05	1.29e-05		2.79e-05	2.61e-05																												0.000101563
Bacteroides gallinarum	0.000529074	0.000632201	0.000641041	0.000294305	0.00148501	0.000425489	0.000317029	0.000783691	0.00191133	0.000978514	0.000510198	0.000494352	0.000391484	0.000301131	0.000334614	0.000443504	0.000793807	0.00131639	0.000233554	0.000207244	0.000669309	0.000208311						0.000556653											0.000565516										0.00107104
Bacteroides graminisolvens		1.22e-05		3.48e-06			1.72e-05				4.42e-05	8.85e-05	9.03e-06		4.49e-06		2.12e-05		6.74e-06	4.6e-06	5.65e-06	1.09e-05																										1.21e-05	1.56e-05
Bacteroides heparinolyticus				0.0817419
Bacteroides ihuae											0.000126035	4.04e-05					4.77e-05
Bacteroides ilei																		2.57e-05
Bacteroides koreensis		9.28e-06	1.25e-05	2.31e-05	3.26e-05			9e-06	4.61e-05	2.2e-06	7.29e-06	4.86e-06	2.78e-06	4.69e-06	3.78e-06	3.5e-06		8.76e-05		9.53e-06	4.17e-05	5.44e-06									2.47e-05
Bacteroides kribbi		0.000204556	0.000259583	0.00034196	0.0002024	0.000412299	0.000245055	0.000329372	0.00254526	0.000319898	0.00195406	0.000141137	0.000357294	0.000310226	0.000143074	0.000308624	0.000282246	0.000129356	0.0010425	0.000241419	0.0003221	4.65e-05	5.97e-05																				0.000832191					5.47e-06	0.000339468
Bacteroides mediterraneensis	0.000261038	0.000390767	0.000339166	6.71e-05	0.000155433	0.000130968	9.93e-05	9.89e-05	0.000427386	0.000456892	0.000320948	0.000109161	0.00012459	0.000175192	0.000357549	0.000391625	0.000148554	0.000373129	0.000160043	7.25e-05	0.000658654	6.33e-05	5.6e-05					0.000127698	0.000129766		8.95e-05			0.00013627	0.000176015				9.73e-05		0.000272531		0.000499805	7.86e-05		0.000419152		7.06e-06	0.000693315
Bacteroides ndongoniae	0.000489414	0.000324906	0.000815365	0.000816624	0.00161948	0.000118612	0.000250491	0.000411741	0.000464795	0.00119563	0.000493124	0.000344607	0.000215984	0.00065926	0.00109374	0.000417803	0.00024846			0.00021143	0.00280102	0.000157991						0.00107503											0.000899625										0.00112643
Bacteroides neonati												1.82e-05							4.19e-05
Bacteroides nordii													0.0226059
Bacteroides oleiciplenus												0.00016781							0.00061188			0.000293452
Bacteroides ovatus	9.22e-05			1.62e-05	1.44e-05		0.000562429										1.28e-05
Bacteroides propionicifaciens	1.1e-05	0.000113415		4.65e-05		0.000381802	0.000174143				0.000510002	0.000923	0.000228516			0.000172465	0.000961022		7.97e-05	0.000188804		0.000132797																	0.000142539						0.000450315			0.00020253
Bacteroides pyogenes	0.000110223	0.000872599	0.00104441	0.00794479	0.0016289	0.00053268	8.85e-05	0.000304755	0.00054675	0.000964624	0.00126502	0.000566729	0.000837241	0.000467495	0.00211201	0.00063	0.000140614	0.000116962	0.000457207	0.000265473	0.00120645	0.000317918	3.02e-05				9.42e-05	0.000138511			0.000118957								0.000234296							0.000114506			0.00064141
Bacteroides reticulotermitis				9.65e-06															2.47e-05
Bacteroides rodentium	0.000236265	0.00023535	2.79e-05	0.00014765	0.000205987		0.00014119	0.000184222		3.6e-05		0.000760438	0.00026321	6.29e-05		2.07e-05	0.000590481	5.05e-06	0.000921545	7.54e-05	0.000112368	0.000813636						6.04e-05								0.000470685							0.00138504					0.000586783	0.000183051
Bacteroides salyersiae															1.2e-05
Bacteroides thetaiotaomicron	0.00053874		0.000221163	0.0191617				7.3e-05									0.000120831	0.17363						0.000836505
Bacteroides timonensis				1.18e-05			7.28e-06					6.53e-05	1.48e-05				8.57e-06		4.04e-05	7.05e-06		8.53e-06
Bacteroides togonis		1.88e-05	4.68e-06	1.44e-05	4.12e-05				1.14e-05		8.73e-06		1.66e-05	2.25e-05	7.6e-05	2.66e-06	0.0022988		1.06e-05	1.06e-05		1.13e-05						4.03e-05																					4.02e-05
Bacteroides uniformis	3.5e-05												0.019873					0.340934
Bacteroides xylanisolvens	4.22e-05			0.0139613	3.17e-05			0.000481678						1.48e-05	2.63e-05		1.49e-05	0.191838
Bacteroides zhangwenhongi	7.74e-05	0.000221586	0.000540052	0.000146521	0.000536422	0.000145074	2.84e-05	0.000299828	0.000396268	0.00040074	0.000293269	0.000444469	0.000315493	0.000232377	0.000470659	0.000197648	0.00037563	5.85e-05	0.000262232	0.000105019	0.000567132	4.08e-05						0.00041731														0.000171073	0.000156074		0.000110317			8.37e-05	0.000478577
Baileyella intestinalis	0.000648057	0.000151515	0.000150486	0.000280789	7.35e-05	6.08e-05	0.000189743	0.000225318	0.000211536	9.09e-05	4.76e-05	9.25e-05	0.000281768	0.00142921	0.00132566	0.000423403	6.01e-05	0.000149165	0.000253338	0.000469904	0.000291631	0.00138328	0.000243336	0.000229528	0.000257541	0.000482419	0.000535157	8.36e-05	0.000351493	8.99e-05	0.000278895	0.000182069	0.000194381	0.000217046	0.000126722	0.000147154	0.000243065		7.34e-05	0.000145489	0.000179288	0.000331512	0.000523799	9.78e-05	0.000265784	0.000384632		3.44e-05	4.37e-05
Bariatricus massiliensis	0.00152985	0.00159451	0.000880104	0.0117098	0.00935845	0.000717239	0.000833713	0.00179875	0.00882792	0.00220042	0.000423942	0.00128714	0.000796091	0.00756579	0.00737294	0.000599585	0.00065029	0.00069276	0.00168328	0.00150042	0.0027342	0.00204521	0.000747203				0.00740732	0.00134019	0.00196821		0.0013732		0.000964133					0.000269793	0.00269851	0.00206114				0.000677304	0.000582169	0.00105483		0.00119265	0.000978664
Bavariicoccus seileri	2.93e-05	9.21e-06		4.16e-05		6.26e-05	2.79e-05				1.93e-05	3.45e-05	3.68e-05			4.53e-05	0.000100952	0.000825325	1.7e-05	5.42e-05	1.14e-05	6.76e-05																					0.00188638					1.18e-05
Bifidobacterium aerophilum		9.89e-05										0.000118657																																					0.000206803
Bifidobacterium aesculapii													6.63e-06												0.000263239																0.000327239
Bifidobacterium angulatum		0.00809903																																														0.123555
Bifidobacterium animalis		0.0107245									0.00596068	0.00894434			0.0109658	0.0217181
Bifidobacterium anseris																		0.00598575
Bifidobacterium apri		3.17e-06	2.84e-05	0.000140746		1.48e-05	3.53e-05		8.46e-06	4.51e-06	9.58e-05	4.67e-05	4.36e-05	2.57e-05	5.96e-05	0.000321606	2.03e-05	2.99e-05		2.6e-05	8.03e-06																											6.18e-06
Bifidobacterium aquikefiri		0.000177008										9.09e-05					7.23e-06
Bifidobacterium boum	0.00104967	0.000988165	0.00398565	0.00147646	0.00103207	0.000235708	0.000718008	0.000746096	0.00185545	0.00112401	0.00411029	0.00467596	0.00286785	0.0017461	0.00604822	0.00873859	0.00176385	0.0020113	0.000523709	0.00110355	0.000277123	0.000527251	0.000392036			0.000554235		0.000211004			0.000704112		0.0001452	0.00107316	0.000283574						0.000665708							0.000495999	0.000350551
Bifidobacterium callitrichidarum													3.35e-05					8.25e-06	5.83e-06			3.46e-05
Bifidobacterium canis														0.000784272		1.95e-05
Bifidobacterium castoris				3.93e-06								5.03e-06
Bifidobacterium catenulatum											0.00496559																																					1.24845
Bifidobacterium choerinum											7.3e-05	0.0190045						0.0160908																														0.000438766
Bifidobacterium criceti		1.71e-05													2.13e-05			0.000113272																														1.44e-05
Bifidobacterium cuniculi																																											0.000742042
Bifidobacterium italicum																		6.29e-05
Bifidobacterium merycicum																																																8.24e-06
Bifidobacterium minimum		0.000330038	9.66e-05	2.76e-05	2.4e-05	6.85e-06	1.31e-05		7.76e-05	6.63e-06	8.1e-05	2.21e-05		9.16e-05	0.000194046	0.000491882	9.66e-06	1.73e-05		0.000774116	6.06e-05
Bifidobacterium mongoliense		0.00010072		0.000165022			0.000317341					0.00181748																																					3.89e-05
Bifidobacterium myosotis																		4.08e-06		7.97e-06
Bifidobacterium pongonis							2.09e-05					6.72e-06																																				0.000306773
Bifidobacterium porcinum		0.000215219	0.000832472	0.000592464			0.00273344		0.000248999	0.000481094	0.00513731	0.00451632	0.00451539	0.000420499	0.000519789	0.00921776	0.000353839	1.11e-05		0.000431819	0.00155624																											0.000472144
Bifidobacterium primatium				1.01e-05			0.000203959
Bifidobacterium pseudolongum	0.0165165	0.315156		0.185325			0.0144625		0.00551793		0.0136885	0.132687		0.02343	0.0124054	0.0158628		0.168352																														0.0294326	0.0339416
Bifidobacterium reuteri	2.1e-05	4.35e-05	2.14e-05	1.8e-05	1.56e-05	1.46e-05	1.35e-05	2.34e-05	4.49e-05	2.16e-05	2.46e-05	6.82e-06	0.000159395	0.000121225	0.000159921	1.71e-05	1.3e-05	6.07e-05	0.000158954	4.7e-05	0.000144163	4.54e-05	7.38e-05																									0.000225969
Bifidobacterium rousetti												3.15e-06								3.38e-06
Bifidobacterium ruminantium							4.53e-05																																									6.24e-05
Bifidobacterium scaligerum							1.92e-05
Bifidobacterium simiarum																															6.19e-06
Bifidobacterium thermacidophilum				5.26e-05			0.000142501				0.000354782	0.000306302	0.000445993			0.000699202					8.77e-05
Bifidobacterium thermophilum	2.99e-05	2.62e-05	0.000211992	0.000863907			0.000381926		0.000108832		0.0026992	0.00155487	0.000292404	0.000126537	0.003074	0.00259125	0.000146905	2.27e-05		8.8e-05	0.000184429																											5.4e-05
Bifidobacterium tibiigranuli		5.26e-06	6.19e-06								6.91e-06											7.22e-06													0.000150095
Bilifractor porci	0.000579416	0.000173025	8.21e-05	0.000808522		2.9e-05	0.000558227	4.56e-06	4.68e-06	5.39e-06	7.33e-06	1.96e-06	8.18e-06	1.98e-05	6.26e-06	1.61e-05		5.91e-06	2.52e-05	0.000498475		0.00299122	3.19e-05																									6.19e-06	2.08e-05
Bittarella massiliensis	3.98e-05		1.54e-05	4.21e-05		1.55e-05	1.41e-05	6.87e-05	1.82e-05		2.13e-05	2.45e-05			1.27e-05		3.37e-05				2.71e-05	0.00877739			0.00889058	0.00647123			0.0123959					0.0100723		0.0103082		0.0198164	0.0167623	0.0246313			0.0974571	0.0068755	0.000257226	0.00134151	0.010722
Blastopirellula cremea	1.74e-05	1.7e-05				4.98e-06				2.69e-06		1.39e-05	6.82e-06	1.34e-05	7.58e-06				6.2e-06	3.94e-06	1.61e-05	7.9e-06	4.27e-05								4.37e-05																	6.92e-06
Blautia caecimuris	1.19e-05	1.42e-06	5.21e-05	0.00021779	0.000671401	3.1e-06	5.92e-06	8.55e-05	6.23e-05	2.6e-05	2.62e-06	1.35e-05	5.04e-05	9.71e-05	0.000178582		0.000196209	9.12e-05	0.000106612		7.63e-05	4.92e-06		0.000101971				0.00045332				0.000440638											0.00213383		0.000795647
Blautia faecicola				3.56e-05					9.18e-06			1.32e-05								7.83e-06
Blautia faecis		0.000752851	0.0005035	0.000345356	0.00034533	3.45e-06	1.76e-06	7.96e-06	0.000557921	0.000327704	3.14e-05	3.62e-05	5.91e-06	0.000478812	0.00106235	0.00127813	9.31e-06	2.46e-05	6.03e-06	0.000583335	4.53e-06	2.6e-06						2.89e-05	0.000130254		6.31e-06			4.68e-05	5.49e-05							0.000288973
Blautia glucerasea	9.86e-05	0.0001063	0.000110557	0.000203763	0.000441603	8.07e-05	0.000206661	0.000277307	0.000246256	0.0001558	0.000101621	6.65e-05	6.71e-05	0.00026689	0.000240261	8.44e-05	0.000166411	0.000108423	4.82e-05	0.000119725	3.87e-05	3.42e-05	9.93e-06		0.000143828	0.000125442		0.000517389	0.000726743	3.36e-05	2.37e-05		8.77e-05					0.000182507	1.65e-05				0.00136327		8.47e-05			8.01e-06	1.35e-05
Blautia hydrogenotrophica	1.61e-05	1.68e-05	1.64e-05	1.04e-05	8.44e-05			2.05e-05						0.000119387	7.52e-05		2.68e-05				4.75e-05										0.000131049
Blautia intestinalis	9.65e-05	0.000294187	0.00047699	0.000293142	0.00020932	0.000218468	7.85e-05	0.000119202	0.000910676	0.000383106	0.000138966	0.000198373	0.000448093	0.000393194	0.00049289	0.000585303	1.3e-05	1.71e-05	0.000205637	0.000317258	0.000180352	0.000107326	3.08e-05		0.000156618			3.49e-05	9.51e-05	0.000103655	4.09e-05	2.01e-05		0.000405353														8.6e-06	4.21e-05
Blautia luti	4.21e-05	0.000531981	0.00227483	0.000885839	0.0045798	0.00043731	0.000106998	0.000896513	0.00235101	0.00145874	0.000837319	0.000629345	0.000369351	0.00210343	0.00290594	0.00116391	0.000530506	0.000424981	0.000306288	0.000638052	0.000296569	0.000353483	7.14e-05	0.000137585		0.000709381		0.00362821	0.00790645	0.000257544	0.000221874	0.000377735	0.00124853	0.00116408	0.000206145			0.000761599	0.000316958	0.000745184		0.00108695	0.001795	0.000166877	0.000184413	0.000134292	0.000384603	5.31e-05	0.000205654
Blautia massiliensis	0.00308565	0.00563488	0.0139225	0.0103579	0.0107077	0.00934166	0.00184085	0.00492591	0.0241938	0.0127079	0.00760483	0.00492129	0.00223897	0.0101123	0.00852507	0.00746844	0.00538694	3.07e-05	0.00239785	0.00366458	0.00308676	0.00200344	2.69e-05			4.54e-05		7.23e-05	0.000198676		5.57e-05	0.000101648	0.000131734	8.92e-05	0.000185874		0.000201161		6.81e-05			0.000206095		6.81e-05	3.28e-05			0.000549726	0.000765069
Blautia obeum	0.00221543	0.0107864	0.00673246	0.0118276	0.0145596	0.0106931	0.0054467	0.0113789	0.029822	0.0131445	0.00862281	0.00980451	0.00608347	0.0130704	0.0155097	0.011153	0.00284517	0.00243483	0.00474777	0.00794116	0.00588126	0.00480985	3.93e-05					0.00276884		5e-05																		0.00357519	0.00276015
Blautia producta	3.87e-05	0.000224072	0.000152741	0.000175243	0.000468939	0.000102086	1.07e-05	8.87e-05	0.000236365	0.000232339	0.000144949	9.53e-05	8.69e-05	0.000584697	0.000286317	0.000218026	5.67e-05	6.74e-05	6.02e-05	0.000113537	0.000113215	7.32e-05						0.000284165	0.000144004	0.00011291	0.000123254		7.79e-05									0.000350581					0.00016017	1.03e-05	0.000264999
Blautia schinkii	2.52e-05	9.2e-05	0.000287516	5.55e-05	0.000301486	4.76e-05	8.56e-05	4.13e-05	0.00113321	0.000843768	7.06e-05	2.18e-05	7.36e-05	0.000123076	9.16e-05	2.44e-05	3.92e-05	8.26e-06	2.11e-05	7.94e-05	3.23e-05	3.43e-05						0.000140805	7.05e-05			0.00036857	2.08e-05												7.59e-05			2.71e-05	1.97e-05
Blautia sp. NBRC 113351							0.0125867
Blautia sp. SC05B48										0.0348256
Blautia stercoris	6.24e-06	2.19e-05	1.7e-05	1.85e-05	5.05e-05	1.46e-05	3.31e-06	1.5e-05	3.23e-05	3.02e-05	2.15e-05	1.23e-05	7.96e-05	2.15e-05	3.84e-05	1.54e-05	1.43e-05	2.33e-05	1.97e-05	1.88e-05	1.46e-05	1.79e-05									5.18e-05		3.95e-05	7.82e-05														1.02e-05
Blautia wexlerae	0.000481586	0.000640326	0.00197531	0.000784514	0.00363922	0.000578882	0.000615114	0.0013485	0.00201776	0.00137014	0.00106874	0.000701691	0.000428749	0.00308521	0.00299584	0.000993894	0.000725023	0.000620277	0.000557758	0.000621133	0.000427903	0.000390959	0.00037054	0.000416804		0.000233797	0.00101277	0.00342573	0.0077618	0.000156815	0.000612998	0.000556014	0.00103352	0.000315609	6.89e-05	8.47e-05		0.00192255	0.000473311	0.000515421		0.000103964	0.00076666	4.03e-05	0.000331947	0.00023266		8.25e-05	0.000414061
Boudabousia liubingyangii																						8.79e-06
Bowdeniella nasicola						0.000138272																2.2e-05
Bowmanella dokdonensis	3.17e-06	8.15e-07			2.02e-06	7.2e-07	5.86e-07	1.77e-06	1.36e-06			3.77e-06			2.58e-06													5.33e-06
Brachybacterium alimentarium	3.59e-06					4.58e-06	2.56e-06		5.92e-05													3.02e-06
Brachybacterium avium						0.000119338
Brachybacterium massiliense																						0.00160846
Brachybacterium nesterenkovii		3.08e-06				4.39e-05							3.51e-06									3.27e-06
Brachybacterium paraconglomeratum							8.02e-05
Brachybacterium tyrofermentans						6.57e-06																1.39e-05
Brachymonas chironomi																						3.05e-05
Brachyspira catarrhinii		1.03e-05	9.67e-06				2.82e-06	5.16e-06				4.87e-06		3.71e-06			3.71e-06			1.13e-06	1.15e-05	3.65e-06															6.44e-05				0.000213361					4.88e-05			1.34e-05
Brachyspira innocens		2.91e-05	2.96e-05									3.19e-06					3.99e-05
Brachyspira intermedia																					7.23e-06
Brachyspira pilosicoli			0.0206054
Brachyspira suanatina			2.16e-05																6.28e-06			2.7e-05
Brackiella oedipodis									8.2e-06					5.08e-05	4.48e-05
Bradyrhizobium manausense													3.75e-06							2.2e-05
Brevibacillus nitrificans																																														0.000164321
Brevibacterium antiquum																						1.54e-05
Brevibacterium epidermidis	1.14e-05	1.63e-05		4.48e-05		5.26e-05	7.28e-05						2.5e-05	1.13e-05	0.000117741			3.6e-05	0.000259666	2.41e-05		0.000779222	7.15e-05				0.000858194																	0.00015079					4.3e-05
Brevibacterium jeotgali																						0.00425485
Brevibacterium linens																						0.0133816
Brevibacterium mcbrellneri													9.5e-06
Brevibacterium permense																						1.41e-05
Brevibacterium sediminis																						1.57e-05
Brevibacterium senegalense																						0.00024805
Brevibacterium yomogidense						4.79e-06	8.88e-06															2.1e-05
Brevilactibacter flavus	3.55e-06					1.75e-05
Brevilactibacter sinopodophylli		9.18e-06											3.11e-06	1.23e-06		4.09e-06			5.3e-06			2.19e-05
Brevundimonas terrae							1.14e-05																																					0.000211349
Breznakibacter xylanolyticus						0.000171499													0.00286811																									0.00124565
Brochothrix campestris	9.39e-07
Brucella gallinifaecis	1.58e-05						1.72e-05												2.42e-05			3.79e-06																										3.69e-05
Brucella haematophila							4.45e-06												2.15e-05
Brucella thiophenivorans																																																2.83e-05
Buchananella hordeovulneris																						2.28e-06
Budvicia diplopodorum											8.85e-06	3.91e-06				7.05e-06
Bulleidia extructa	0.00182181	0.00409856	0.00386844	0.00326726	0.00114153	0.00155898	0.000531458	0.00194934	0.00487764	0.00198825	0.00118896	0.0028389	0.0035138	0.00751135	0.00700993	0.0068158	0.00135426	0.000391385	0.00177748	0.0036171	0.00293728	0.00224468	0.000313741		0.000994121		0.000885923	0.00054783	0.00149072	0.000589876	0.000311026	0.000548442	0.000722695	0.000601085	0.0004052	0.00050766		0.000878093	0.00100583						0.000929864		0.000636892	0.000563527	0.00115785
Bullifex porci	6.14e-05	2.02e-05	1.74e-05	1.07e-05	4.48e-05	1.78e-05	5.92e-06	1.24e-05	2.71e-05	2.08e-05	3.57e-05	9.88e-06	1.95e-05	2.55e-05	2.56e-05	2.84e-05	4.56e-05	1.65e-05	1.9e-05	7.3e-06	6.93e-05	1.36e-05	6.45e-05	0.000346728														0.00021239											8.62e-05
Butyricicoccus faecihominis	0.00386211	0.000688872	0.000811114	0.00427505	0.0013163	0.000543293	0.00223499	0.00678041	0.00200149	0.00109283	0.000723988	0.00057874	0.00128009	0.0085575	0.00226943	0.000575515	0.000798613	0.00149973	0.000554791	0.00133336	0.000745187	0.000600596	0.00281792	0.00199183				0.000609433	0.00161512	0.00102925	0.00328484	0.00123225	0.00146822													7.54e-05		0.00160683	0.000437765
Butyricicoccus porcorum	0.000368363	0.000554836	0.00040611	0.000304851	0.000876392	0.0012641	6.29e-05	0.000479835	0.00124593	0.00141029	0.00106745	0.000518785	0.000275643	0.000721153	0.000913534	0.000536133	0.000415662	0.000241251	0.000350472	0.00062762	0.000259792	0.00071336	0.000241397			0.000233849		0.000506394	0.000123257	0.00092307	4.54e-05		0.000979914	0.00102957	0.00124351			0.00183722	0.000248537		0.000307803	0.00127746					0.00247182	0.000125536	0.000920471
Butyricicoccus pullicaecorum	6.32e-05	7.44e-06	2.2e-05	6.2e-05	2.88e-05			2.23e-05	3.12e-05	9.52e-06	3.38e-06	4.02e-06	4.05e-06	0.00041358	0.000160318		1.71e-05	3.45e-05	1.01e-05	1.7e-05	3.82e-06	1.93e-05																	2.21e-05				0.000137983		4.4e-05				1.42e-05
Butyricimonas paravirosa	3.11e-05	5.09e-06	2.41e-05		2.25e-05			7.51e-06	3.19e-05	1.05e-05	1.15e-05	2e-05	1.4e-05		2.07e-05	9.37e-06	1.34e-05		4.03e-05		4.21e-05	2.03e-05	4.62e-05																										3.43e-05
Butyricimonas synergistica	1.53e-05	5.13e-05	1.25e-05		5.63e-06		7.46e-06			2.42e-05	3.78e-05	1.05e-05		1.71e-05	4.49e-05	2.85e-05	2.03e-05	4.42e-06		1.18e-05	8.58e-05	4.7e-06	3.1e-05					2.91e-05																					5.18e-05
Butyricimonas virosa				0.0326232			0.104515						0.023636				0.0181468
Butyrivibrio crossotus	1.88e-05	0.000807796	0.000919386	6.72e-05	0.00243441	4.17e-05	4.34e-06	0.000102582	9.79e-05	4.54e-05	0.000353931	0.000337196	0.000639896	1.71e-05	0.000923347	0.00014103	4.06e-06	3.69e-05	2.46e-05	5.64e-06	0.000349494	9.75e-06						0.000248416																					0.000492662
Butyrivibrio fibrisolvens	1.04e-05	6.83e-05	4.06e-05	3.65e-05	2.81e-05	1.37e-05	2.36e-05	2.89e-05	7.08e-05	0.000129158	2.12e-05	2.89e-05	5.37e-05	0.000327319	0.000208632	3.68e-05	1.06e-05	4.21e-05	9.7e-05	5.37e-05	6e-05	7.33e-05											9.01e-05						3.87e-05							0.000214979		4.95e-06	9.8e-06
Caballeronia grimmiae						9.87e-07							9.77e-07						1.32e-06		1.07e-06
Caballeronia mineralivorans															1.57e-06																											7.68e-05
Caldibacillus hisashii	9.52e-06	8.71e-06			1.32e-05	1.76e-06			2.38e-05	2.59e-05		2.25e-05		3.24e-05					1.16e-05		1.2e-05
Caldisalinibacter kiritimatiensis														8.72e-07	1.2e-06
Caloramator proteoclasticus																			2.38e-06
Caloranaerobacter azorensis	2.11e-06			1.78e-06		2.22e-06			3.84e-06										1.67e-06	1.79e-06	2.05e-06
Campylobacter coli																										0.00012071
Campylobacter jejuni		0.000130819	0.000315744						6.76e-05	1.08e-05			0.000143664	0.000186921	0.000172528				8.22e-05		0.0011181	0.00089559																	0.00020036										3.45e-05
Candidatus Accumulibacter aalborgensis															1.1e-05
Candidatus Marispirochaeta associata												1.09e-05				1.2e-05
Candidatus Melainabacteria bacterium MEL.A1						0.00653932
Candidatus Oscillochloris fontis	4.85e-06	6.01e-06															9.59e-06				7.55e-06																												1.24e-05
Candidatus Soleaferrea massiliensis	3.51e-05	1.33e-05	2.15e-05	4.86e-05	3.93e-05	1.75e-05		8.29e-05	4.92e-05	4.74e-05		1.73e-05	1.26e-05		2.97e-05	3.35e-05					1.5e-05
Candidatus Stoquefichus massiliensis						1.03e-05
Capillibacterium thermochitinicola	1.67e-05			1.96e-05
Capnocytophaga canis																					1.47e-06
Caproiciproducens galactitolivorans	0.00558246	0.00108149	0.000696238	0.00142622	0.00143395	0.00554268	0.00109032	0.00324394	0.000778934	0.000597437	0.000434678	0.000461954	0.00322377	0.00760389	0.00323405	0.000619424	0.00173144	0.00316449	0.00123391	0.000459751	0.00144241	0.00074542	0.0393555	0.0154462				2.51e-05		0.00907702	0.012625						0.0204366											0.000300846	0.00111942
Carideicomes alvinocaridis	1.34e-06												1.99e-06					1.82e-06		1.35e-06		9.13e-06
Carnobacterium divergens	8.1e-05						0.00034627
Carnobacterium gallinarum	0.000210246										0.000734964	0.000192514								0.000334824
Carnobacterium inhibens						0.00801784					0.00365502					0.0128066														0.00087724											0.00183862
Carnobacterium jeotgali						0.0156896		2.5e-05			0.00715162					0.0120417
Carnobacterium maltaromaticum	0.000167557			0.000220133				4.51e-05					0.00100652								6.86e-05		0.000517545
Carnobacterium mobile						9.37e-05					1.47e-05		1.29e-05			7.85e-05																			0.000589301
Carnobacterium sp. CP1											2.75e-05
Carnobacterium sp. CS13											0.0101714
Carnobacterium viridans						0.0030411				1.78e-05	0.00268774					0.00335297														0.000391882
Caryophanon latum						4.33e-05					5e-06	5.01e-06	8.53e-06							5.51e-06		6.74e-05
Caryophanon tenue						8.92e-05				1.61e-05						1.65e-05				1.66e-05		0.000328413																										3.3e-05
Catenibacillus scindens	0.000288483	0.000448352	0.000488997	0.000453734	0.000565482	0.000372605	0.000148117	0.000497739	0.000793585	0.000369521	0.000266806	0.00030052	0.000432493	0.00148041	0.00128187	0.0004555	0.00016878	0.000213693	0.000135332	0.000284779	0.000480446	0.000249534	0.000212055					0.000564954					0.000832893						0.000808885									0.000110107	0.000240809
Catenibacterium mitsuokai	0.000375854	0.000220026	0.0001034	0.00025577	0.000115725	8e-05	0.000236829	0.000299784	0.000276124	0.000295368	5.88e-05	0.000116366	3.99e-05	0.000282728	0.00034406	0.000218175	3.37e-05	6.84e-05	9.7e-05	0.000193425	6.64e-05	0.00024352	0.000702946	0.000804535	0.000713514	0.000391116	0.00116613	0.000120819	0.000254406	0.0001979	0.000428589	0.000288365	0.00047373	0.000669895	0.000761144	0.00123464	0.000574868	0.00207584	0.000395688	0.00128766		0.00127113	0.00177712	0.000406673	0.000343171	0.000641989	0.000623178	0.00041031	0.000106103
Catenibacterium sp. co_0103	0.0368387	0.0254059		0.0286677			0.0222072	0.0390795	0.033647	0.0341397		0.0133278		0.0215215	0.0262304																																	0.0610058
Cecembia lonarensis																						1.72e-06
Celeribacter persicus	1.29e-05
Cellulomonas citrea											2.62e-06								8.03e-06						5.86e-05					1.51e-05
Cellulosilyticum ruminicola	5.07e-06			2.42e-06				3.07e-06	3.86e-06	1.16e-06	2.34e-06	1.86e-06	9.53e-06		3.21e-06		1.31e-06		3.19e-06		5.4e-06		1.27e-05																									7.03e-06
Cerasibacillus terrae		9.04e-06				4.35e-05						2.64e-05				4.87e-05				1.31e-05		4.76e-05								9.68e-05
Chitinophaga silvisoli				6.67e-06
Chlamydia suis	3.43e-05	0.00496483	0.0071854	0.0069004		0.00226197	0.00354861		0.0122725	0.00737145	0.00270874	0.0197649	0.0182979	0.0100506	0.0205994		0.00206762	0.00678913	0.00677603	0.00523346	0.00388318									0.000187281			0.00208439				0.00163319	0.000976352	0.00137546	0.00561428			0.00580019					0.00312308	0.00266853
Christensenella hongkongensis				2.76e-05
Christensenella intestinihominis	2.6e-05	1.61e-05		2.2e-05	3.76e-05	3.05e-05	8.01e-06			3.7e-05	3.73e-05	1.19e-05					2.12e-05			1.28e-05	2.74e-05	5.27e-05																											5.24e-05
Christensenella minuta							0.00445048
Chryseobacterium koreense							2.79e-05
Chryseobacterium lacus						6.21e-06													1.27e-05			1.63e-05																										3.34e-05
Chryseobacterium oncorhynchi	1.26e-06	4.7e-06	1.79e-06			3.53e-06				1.18e-06	2.23e-06	9.56e-07			1.26e-06					1.27e-06	2.18e-06	2.4e-06																										1.96e-06
Chryseobacterium paridis							3.39e-06
Chryseobacterium phosphatilyticum										1.04e-06											1.05e-06											1.93e-05											0.000170792
Citrobacter freundii				0.000981879							0.000130502											2.42e-05
Citrobacter koseri																					6.62e-06
Citrobacter rodentium				1.01e-05
Cloacibacillus porcorum	0.0156999						0.00710317										0.0295291
Clostridiaceae bacterium Marseille-Q4149	0.0221207			0.0206853			0.0112296			0.0252389				0.0400165	0.0186928
Clostridiales bacterium	0.0175156	0.00909304		0.0302679		0.00915653	0.0220922			0.00316716	0.0109188	0.00340133	0.00487651	0.0100216	0.00950377		0.0206572	0.0130786			0.00775741	0.0048728																											0.00767703
Clostridiisalibacter paucivorans						0.000129207																								0.000551664
Clostridioides difficile				2.32e-06										9.68e-05	2.19e-05
Clostridium acetireducens	2.1e-06
Clostridium akagii													6.14e-06
Clostridium aminobutyricum	0.000123147	4.87e-05	3.36e-05	0.000123976	9.23e-05	2.93e-05	3.78e-05	8.46e-05	6.14e-05	4.68e-05	2.51e-05	4.63e-05	0.000112301	0.000213534	0.000169833	9.46e-05	4.13e-05	4.03e-05	5.51e-05	6.56e-05	0.000125033	4.8e-05	5.37e-05	8.66e-05			0.000520181	5.6e-05	0.000212426																				2.04e-05
Clostridium cagae																						4.58e-06
Clostridium cavendishii																					3.74e-06	2.7e-06
Clostridium celatum	0.00198807	0.00260466	0.00256321	0.00324618	0.0021881	0.00068011	0.000225331	0.00412535	0.00321703	0.00413273	0.000394525	0.00213388	0.000490176	0.00157181	0.00254825	0.00431264	0.000386455	0.000270852	0.00254848	0.00222246	0.00190421	0.000618558	0.00244807	0.0062935	0.00467287	0.000545192	0.0155943	0.00252886	0.00163639	0.00569965	0.00636469	0.00391775	0.00288606	0.00292499	0.000709488	0.000384219	0.00299055	0.00241716	0.0024234	0.0097627	0.000532969	0.00428618	0.00269159	0.00172515	0.00663617	0.00523709	0.00693744	0.000221993	0.00099667
Clostridium chromiireducens	1.66e-05	0.000132073		0.000181016				1.62e-05	8.64e-06			3.08e-05		2.25e-05	6.46e-05	6.39e-05	2.13e-05			1.43e-05	8.93e-06		0.000348688	0.000486946	0.000394625																								8.01e-05
Clostridium colicanis																1.8e-06
Clostridium cuniculi	0.00127728	0.000890057	0.000789912	0.00287669	0.000201516	0.000203938	5.8e-05	0.00169109	0.000781678	0.000303301	5.26e-05	0.000436256	0.000242684	0.000746694	0.000755469	0.00120047	0.000233852	0.000306541	0.000183966	0.000435345	0.00043417	4.75e-05	0.0084315	0.00997696	0.00528184	0.00282367	0.0118136	0.000304861	0.000927236	0.00242753	0.00203277	0.00139944	0.00251006	0.000961969	0.00012506	0.00213634	0.00164504	0.00173728	0.00248064	0.00549827	0.00386574	0.00296068	0.00580475	0.00272073	0.00284902	0.0031641	0.00188087	0.000161461	0.000531638
Clostridium cylindrosporum																	4.89e-06
Clostridium disporicum	0.00053626	0.000257789	0.000130563	0.000838652	0.000131833	6.1e-05	2.97e-05	0.000531617	0.000308463	0.000301202	3.41e-05	0.000196602	0.000113643	0.000231798	0.000303793	0.000454114	6.52e-05	7.85e-05	0.000202682	0.000319466	0.000308705	2.99e-05	0.00252242	0.00244861	0.00155612		0.00444997	0.000411973	0.000323316	0.00121396	0.00100851	0.000454856	0.000497443	0.000518269		0.000239534	0.000334643	0.00100624	0.000611638	0.00127845	0.000840917	0.000955617	0.00122866	0.000913764	0.000813301	0.00131565	0.000631455	1.73e-05	0.000103102
Clostridium fessum		1.11e-05	9.03e-06	1.41e-05				9.13e-06	0.000165948	0.000157099	9.98e-05	7.25e-06	5.98e-06		4.94e-06	1.75e-05		3.23e-05	8.5e-06	2.64e-05	1.03e-05	1.05e-05	8.92e-05					9.01e-05					9.29e-05	0.000110309
Clostridium frigoris				1.18e-05
Clostridium guangxiense							2.52e-06										4.08e-06
Clostridium haemolyticum													1.44e-06
Clostridium ihumii		5.08e-06											3.55e-06					2.42e-05
Clostridium indicum	0.00010145	0.00012364	0.000187522	0.000273944	0.000401655	0.000155424	0.000197038	0.000172365	0.000172889	0.000191006	0.000201954	9.94e-05	0.000152709	0.00037367	0.000376312	0.00013604	0.000110643	0.000255617	0.000166902	0.000129322	0.000300363	0.000124843	0.000332316	0.000399721				0.000227992										0.00116679	0.000320071									6.2e-05	0.000117365
Clostridium jeddahense	5.39e-05	0.000188953	0.00016483	8.18e-05	8.14e-05	0.000282538	1.59e-05	0.000108988	4.98e-05	0.00018666	0.000164336	7.34e-05		0.000348845	0.000486123	0.000146592	2.36e-05	5.11e-05	8.07e-05	8.01e-05	0.000281056	4.9e-05						6.72e-05																					0.000102707
Clostridium magnum	5.39e-06	1.05e-05					2.35e-05			8.88e-06	4.47e-06	4.35e-06	6.49e-05				9.98e-05		0.000200154				3.08e-05							4.93e-05														0.000271837				3.57e-05
Clostridium minihomine	2.3e-05	5.87e-05	5.19e-05	0.00016025	0.000200133	5.93e-05	2.51e-05	2.46e-05	0.000178083	5.87e-05	1.97e-05		0.000218879	0.00119859	0.000126283	4.65e-05	5.93e-05	3.03e-05	4.29e-05	1.98e-05	3.82e-05																	0.00052743
Clostridium moniliforme																						7.62e-06
Clostridium nigeriense											1.7e-06							2.93e-06
Clostridium paraputrificum	0.000176122	5.43e-05	5.04e-05	0.000121047		7e-06	2.31e-05	2.58e-05	5.66e-05	4.71e-05		7.92e-06	4.03e-05	3.84e-05	1.93e-05	0.000101819	3.01e-05	6.52e-05	3e-05	2.6e-05		1.46e-05	0.000124818																				0.00131268					9.14e-06
Clostridium polyendosporum		1.59e-06						3.22e-06		2.89e-06		1.75e-06	1.61e-06	2.12e-06						3e-06		1.1e-06	1.08e-05								2.82e-05						6.25e-05											2.14e-06
Clostridium polynesiense	0.00012548	1.78e-05		6.2e-05	0.000109916			0.000116803	0.000143884	0.000185512	5.02e-05		7.66e-05	2.17e-05	2.19e-05	3.01e-05			6.66e-05			1.42e-05																											7.45e-05
Clostridium porci	0.000857774	0.000174923	0.000513019	0.000757335	0.00107266	0.000247562	0.000419248	0.000602027	0.000448728	0.000584351	0.000445868	0.000365125	0.000424607	0.00156347	0.000974008	0.000396984	0.000250322	0.000186721	0.000360621	0.000101663	0.000270684	0.000364472	0.000428645					0.00047643			0.000367541													0.000339188				0.000160309	0.000265789
Clostridium psychrophilum			1.45e-05																	1.12e-05
Clostridium puniceum	2.46e-05	1.56e-05	3.47e-05	2.45e-05				5.57e-06	2.5e-05				7.76e-05		1.14e-05	9.08e-05	9.41e-06	1.24e-05	9.46e-06	2.92e-06	6.15e-06	8.16e-06	8.13e-05	0.000186695															4.59e-05								0.000234696		1.18e-05
Clostridium sardiniense	1.33e-05		3.41e-06	2.2e-05			2.18e-06		4.18e-06	4.43e-06		2.2e-06	1.66e-06					6.15e-06		3.12e-06	2.28e-06		2.63e-05				6.14e-05				1.58e-05	2.27e-05	2.91e-05																6.05e-06
Clostridium sartagoforme	3.75e-05	2.62e-05		7.98e-05				4.19e-05	2.57e-05	3.87e-05	1.75e-06	2.32e-05	2.64e-05	5.87e-06	2.62e-05	4.45e-05	7.52e-06	1.55e-05	2.34e-05	4.05e-05	2.71e-05	5.82e-06	8.99e-05	0.000114051				5.11e-05			3.73e-05	0.000172246	5.38e-05						4.85e-05							0.000136677	9.46e-05		8.7e-06
Clostridium saudiense	0.000465997	0.000188263	9.33e-05	0.00109765	1.9e-05	5.81e-05	6.59e-05	0.00065267	0.000369023	0.000425972	2.21e-05	0.000197102	0.000185532	0.000235028	0.000267414	0.00052704	4.18e-05	8.16e-05	0.000424211	0.000469276	0.000275074	2.89e-05	0.00115502	0.000763921	0.000352419	0.000158984	0.00546094	0.000878475		0.00104248	0.00399206	0.00199311	0.0017455	0.00777057					0.00122554	0.000156587	0.000193205	0.000114782	0.000361515	0.00173258	0.00243528	0.00184289	0.00141318	0.000102105	0.000106565
Clostridium sp.	0.0128231	0.0181233	0.0415032	0.00637218	0.236279	0.0128697	0.00482743	0.0439832	0.018725	0.0273904	0.0149303	0.0116617	0.00523869	0.00481671	0.00710132	0.00685812	0.0115301		0.0139325	0.013758	0.00926734	0.00658433						0.230778	0.11702
Clostridium sp. M62/1				0.000256796
Clostridium sulfidigenes	9.95e-05					1.15e-06					1.06e-06		7.75e-06				7.39e-06				1.88e-06	1.2e-05
Clostridium tarantellae	9.82e-07			7.87e-07																1.19e-05			1.88e-05
Clostridium tepidum																																														4.7e-05
Clostridium tetani										8.24e-06												1.26e-05																										1.26e-05
Clostridium thiosulfatireducens	0.00033806					6.72e-05	7.39e-05			1.62e-06			2.01e-05							2.09e-05																											0.00108747
Clostridium uliginosum	4.79e-05			1.69e-05		0.000154076	1.34e-05	2.03e-05		1.43e-05		1.89e-05	1.24e-05	2.03e-05			4.36e-05	3.51e-05		1.99e-05		6.58e-05	4.05e-05
Clostridium vincentii															5.7e-06			8.98e-06					6.03e-06
Clostridium vitabionis	0.000133271	0.000265474	0.00056782	0.000464144	0.0016226	0.000252888	0.000152344	0.000457221	0.00127027	0.000203899	0.00024805	0.000546378	0.00281823	0.00133413	0.00114788	0.000445564	4.95e-05	0.000540289	0.000566517	0.000862451	0.000601044	0.000215334	0.000670744				0.00140944	0.000707411	0.00151196	0.000205881	0.000462256		0.0008132		0.000435884		0.000606483		0.00066653			0.00176831						0.000168713	0.000363009
Clostridium zeae
Cobetia crustatorum																							3.01e-05
Collinsella aerofaciens	0.0374131	0.0234286	0.0169564	0.0445422	0.0205168		0.0681469	0.0571534	0.0250041	0.0174273	0.0164452	0.0294838	0.0315283	0.214805	0.109946	0.048391	0.0205771	0.0690845	0.0353335	0.0566195	0.025265	0.0373263																										0.0313892
Collinsella bouchesdurhonensis	0.000749586	0.00143536	0.000654656	0.00171088	1.43e-05	0.00074673	0.00117477	0.00107776	0.000965451	0.000849415	0.000694502	0.00160427	0.00251815	0.00352385	0.00182803	0.00467871	0.000631066	0.000267134	0.00181588	0.00227383	0.000148563	0.00328329	8.07e-05	0.000198742							4.54e-05	5.44e-05	0.000130026	0.000136043						0.000239943								0.00166278	2.9e-05
Collinsella ihumii													0.0001151	7.72e-05	7.93e-05				5.97e-05					0.00399122
Collinsella intestinalis												2.78e-06	8.31e-06									1.29e-05
Collinsella provencensis		8.49e-05	1.42e-05	2.86e-05				3.36e-05	3.38e-05	6.01e-06			3.48e-05	0.000104026	0.000124315	4.21e-05	5.92e-06		1.49e-05	4.11e-05	0.000127713	5.73e-05			0.000185104						6.19e-05
Colwellia chukchiensis							6.53e-05										6.64e-05
Colwellia ponticola		1.23e-06		1.39e-06						8.75e-07				1.36e-06	5.31e-06							1.44e-06
Comamonas aquatica													0.0248988						0.025257																													0.064686
Comamonas composti							2.54e-06								2.55e-06				1.72e-05
Comamonas denitrificans													1.46e-05				7.23e-06		2.77e-05
Comamonas jiangduensis				1.01e-05		3.68e-05	1.23e-05				1.57e-05	1.85e-05	5.51e-05				9.84e-05		0.000101409	1.48e-05																	0.000491381							0.00267897				9.04e-05
Comamonas suwonensis							2.66e-06					2.9e-06							4.84e-05																													4.95e-06
Comamonas testosteroni	3.67e-05	4.62e-05				0.002022	8.31e-06						0.0187425				0.0282312	0.00010378	0.034155			0.00149662	0.000160845							0.00038584
Comamonas thiooxydans						1.65e-05						1.04e-05	5.67e-05				5.87e-05		0.000107097																									0.000494197				9.66e-05
Companilactobacillus alimentarius		0.00102955					0.000576035			0.000424852		0.000178511					0.000227044	7.39e-06		0.000191485	0.000233375																												0.000453964
Companilactobacillus baiquanensis		0.000353454					0.000387622			0.000194976							0.000216114			9.77e-05	4.74e-05																												0.000111842
Companilactobacillus bobalius		6.39e-06		1.01e-05			0.00138355	7.11e-06		0.00045308							2.29e-05	1.46e-05		0.000293023	1.22e-05
Companilactobacillus crustorum							0.00015014			0.000185689							0.000114102	4.2e-05		4.37e-05
Companilactobacillus farciminis		6.82e-05					0.0901007			0.0653375							0.04139	0.0047841		0.00816475	0.00507205																								0.000520597
Companilactobacillus formosensis		3.68e-06					3.11e-06			6.45e-06										2.29e-05	6.31e-06
Companilactobacillus furfuricola				4.83e-06			3.37e-05	5.67e-06		3.06e-06											5.97e-06
Companilactobacillus futsaii		0.000387263		3.22e-05			0.000166573	2.33e-05		0.000548107		1.89e-05					9.37e-05	3.24e-05		4.76e-05	0.000695278	5.8e-06									8.68e-05			0.00123731								0.000905056	0.000823912		0.000438365	0.000802381
Companilactobacillus halodurans		0.000220836	1.64e-05	3.5e-05			0.000686259	1.09e-05		0.000553229		7.63e-05	9.79e-06	0.00010699	2.01e-05		0.00052976	0.000181434		0.000312963	0.000456162																						0.000988571		0.000969359				6.87e-05
Companilactobacillus heilongjiangensis		0.00639588					0.00542883										0.0435646	0.0112156		0.00696268																												0.0106417
Companilactobacillus huachuanensis		3.55e-05					3.25e-05	2.22e-05									7.64e-05	5.79e-05		2.35e-05	2.81e-05																											3.96e-05	5.59e-05
Companilactobacillus hulinensis	0.000688727	0.000173817	1.87e-05	8.74e-05			0.000199707	3.92e-05		0.000214832	1.15e-05	8.67e-05	5.99e-05	0.000252782	4.45e-05		3.22e-05	2.76e-05		2.06e-05	0.000200714		0.000223589											0.000662418											0.000233867			3.56e-05	3.54e-05
Companilactobacillus insicii							0.000919239	4.01e-05									4.63e-05	9.26e-06		1.57e-05	1.92e-05
Companilactobacillus jidongensis							0.000126448										0.000163652				5.24e-06
Companilactobacillus kedongensis								1.71e-05				1.01e-05																																				7.4e-05
Companilactobacillus keshanensis				4.04e-05			1.82e-05										6.88e-05	5.8e-06			3.94e-06																												3.9e-05
Companilactobacillus kimchiensis		0.000106604					9.91e-05			1.12e-05																																							0.000280733
Companilactobacillus kimchii		3.57e-06					0.000476276	8.08e-06		0.000284862		6.32e-06					4.62e-05	8.53e-06		0.000462536	1.48e-05																												3.28e-05
Companilactobacillus mindensis	1.02e-05	6.47e-05	8.37e-06		4.9e-05	1.79e-05	0.000129586	2.67e-05	3.12e-05	5.61e-05		1.11e-05	7.9e-06	1.35e-05			0.000109211	9.51e-06	5.75e-06	6.64e-06	0.000113748	5.74e-06	0.00029657	0.000205193	0.000792506						0.000117624		0.000157407										0.00182827					6e-05	8.42e-05
Companilactobacillus mishanensis	3.37e-05	7.39e-05		0.000144152			8.02e-05	2.05e-05		2.78e-05		4.89e-06	2.62e-05	1.04e-05	7.01e-06		6.06e-05	0.000167839		4.75e-05	0.000112179	4.16e-06	8.31e-05		0.000232543		0.00168146							0.000226286				0.000319598					0.000564504					5.06e-05	9.53e-05
Companilactobacillus musae							0.000634061													1.46e-05																							0.000806434						1.18e-05
Companilactobacillus nantensis		0.000103604			3.37e-05		0.000215006	9.8e-05		9.62e-05		1.6e-05		7.73e-05	3.64e-05		0.000411874	0.000133317	1.34e-05	6.01e-05	2.02e-05				0.00030312									0.000377067		0.00022874		0.000354377		0.00120393		0.000392692	0.000929085					7.26e-05	3.59e-05
Companilactobacillus nodensis		0.000367404					0.000390672	5.79e-06				3e-05				6.3e-06	0.000308007				0.00101221																											0.000147906	3.73e-05
Companilactobacillus nuruki	1.13e-05	3.14e-05	8.52e-06	6.63e-05			0.000133693	2.19e-05	1.96e-05	3.59e-05	8.54e-06	4.02e-05	1.77e-05	1.83e-05	1.7e-05		3.36e-05	2.43e-05		2.41e-05	0.000100325	5.69e-06	0.000285209	0.000171027	0.000461365									0.0001467								0.000655139	0.00165304		0.00027262	0.0011908		9.31e-06	2.31e-05
Companilactobacillus pabuli							0.00403089			0.00198058							0.00119963			0.000253851	0.000467919
Companilactobacillus paralimentarius		0.000126943				1.15e-06	0.000862949			4.91e-05		2.92e-05					0.000182959	3.85e-05		7.51e-05	2.11e-05													0.000613556								0.000764604						3.15e-05	0.000122765
Companilactobacillus suantsaicola		3.22e-05		1.39e-06			0.000394985	0.000101848	3.64e-05	0.000144335	1.09e-06		3.02e-06	1.45e-06	1.77e-06		0.000200442	3.37e-05		0.00110551	6.6e-05									1.49e-05				3.89e-05								0.00301624							0.000119749
Companilactobacillus tucceti		1.39e-05					9.75e-05			9.39e-05		7.57e-06	2.14e-05		1.06e-05		0.000137547	8.89e-05		0.000139697	3.63e-05																												2e-05
Companilactobacillus versmoldensis		6.22e-05															4.06e-05				8.33e-06
Companilactobacillus zhachilii		2.49e-05		4.6e-05			0.00296465	3.75e-05		0.000234225		7.37e-06	2.51e-05				0.000347756	4.47e-05		6.61e-05	9.22e-05													0.000205766		3.42e-05						0.00121108						4e-05	8.86e-05
Companilactobacillus zhongbaensis	3.87e-05	4.75e-05		3.31e-05			5.19e-05	6.51e-05		6.67e-05		6.79e-05	5.39e-05		5.62e-06		0.000107367	2.63e-05		9.43e-06	5.57e-05										7.12e-05			0.00165871			0.00054486												1.11e-05
Coprococcus catus	0.000162289	0.00776654	0.0410404	0.00507648	0.0650354	0.00743408	0.00323913	0.0324283	0.051464	0.0682159	0.0171825	0.009711	0.0125437	0.00962514	0.0396302	0.0540068	0.0107205	2.88e-05	0.00530636	0.0084641	0.00591937	0.00490827				3.53e-05		7.98e-06			9.93e-06					9.23e-05			1.44e-05										0.0166136
Coprococcus comes	0.0142906	0.021502	0.0288624	0.0236867	0.027279				0.0383509	0.0306188				0.0315746			0.0101072
Coprococcus phoceensis		6.59e-05	9.42e-05	6.87e-05	4.43e-05	8.17e-05	1.97e-05	1.67e-05	0.000214911	9.42e-05	7.21e-05	5.35e-05	3.52e-05	8.28e-05	0.000164779	0.000126809	1.68e-05		5.3e-05	8.49e-05	2.32e-05									0.000128117																		2.16e-05	3.1e-05
Corallococcus aberystwythensis																						2.88e-06
Corynebacterium accolens										4.68e-06											4.95e-06	4.3e-06
Corynebacterium alimapuense						1.21e-05						1.41e-05				0.000108185																																2.38e-05
Corynebacterium ammoniagenes																				0.0249393
Corynebacterium appendicis							1.66e-05															9.52e-05
Corynebacterium bouchesdurhonense																				4.96e-06
Corynebacterium casei	9.47e-05	0.00345429		0.0109319			0.00702152					0.00506836	1.27e-05	0.000157169	0.000374496	0.0315504			0.00429244	0.0114195		0.0389526														0.000247687				0.000337475								0.0133087
Corynebacterium comes																						0.00036448
Corynebacterium crudilactis	0.000701821	0.00265685		0.001649			0.00230253						0.000135557	6.55e-05	0.000488958				0.00191068	0.000822999		0.00398244
Corynebacterium dentalis							0.000288593							0.000235768	0.000575766					0.000612214		0.000812814
Corynebacterium deserti		0.000182177		0.00122135		7.84e-05	0.00117717													0.00137878		0.000910368
Corynebacterium diphtheriae						5.74e-06
Corynebacterium efficiens																0.000248368				0.000168047		0.0391904
Corynebacterium flavescens																				0.0136007
Corynebacterium frankenforstense			0.0115182
Corynebacterium glutamicum	0.0110133	0.0318966		0.0275765			0.0781795			0.00615144		0.0104842	0.0125018	0.00436928	0.00969116		0.00432422		0.046713	0.0223205	0.00959186	0.0729433																									0.000776659
Corynebacterium humireducens												2.53e-06		2.19e-06		8.47e-06		4.61e-06	7.02e-06	4.21e-06		0.000131693
Corynebacterium jeddahense																						1.4e-05
Corynebacterium lipophiloflavum	4.04e-05	0.000124034														3.03e-06						3.54e-05	5.65e-05
Corynebacterium lubricantis		5.4e-05		3.14e-05		8.05e-06	0.000166744					4.21e-05		1.4e-05		1.56e-05		5.33e-06	8.73e-05		6.43e-06	7.22e-05
Corynebacterium marinum		7.21e-05					0.000344137					8.08e-05								0.000400032		0.000220603
Corynebacterium maris												0.0170973										0.00701769
Corynebacterium massiliense													1.54e-05
Corynebacterium matruchotii																						4.32e-06
Corynebacterium neomassiliense	9.59e-06																					1.49e-05
Corynebacterium pacaense												8.58e-06			5.51e-06				3.46e-06	6.15e-06
Corynebacterium phoceense						4.18e-06						2.92e-06		3.92e-06					3.88e-06
Corynebacterium pilosum												0.121018
Corynebacterium pollutisoli						0.00026155							0.00119717							7.64e-05		0.00196576
Corynebacterium qintianiae														2.81e-06					1.83e-06	2.38e-06		5.65e-05
Corynebacterium sputi																4.33e-06				2.05e-06		9.42e-05		5.67e-05
Corynebacterium stationis		0.00911717	0.0481415	0.00860821			0.0254665					0.0426885	0.0126741	0.0111563	0.0244546	0.0225338			0.00761502	0.0348061		0.0401571																										0.00544542
Corynebacterium striatum	8.35e-05	1.71e-05	1.69e-05	7.39e-05			2.88e-06				6.88e-06	1.02e-05	5.65e-05			2.68e-05		8.95e-05	1.54e-05			1.45e-05	4.84e-05
Corynebacterium suicordis				2.71e-06			0.000149052													3.92e-05		7.52e-06
Corynebacterium tapiri				5.26e-06			3.55e-06								8.94e-06							8.9e-05
Corynebacterium tuscaniense	1.97e-05						5.68e-06															3.83e-05
Corynebacterium urinipleomorphum							2.99e-06
Corynebacterium variabile				7.18e-05	1.94e-05	0.000282285	0.0153746	0.000149056				0.000296838	3.74e-06	1.65e-05	2.24e-06	2.14e-05		2.69e-06	3.33e-05	0.00103911	1.22e-05	1.78e-05																										8.03e-05
Corynebacterium xerosis	0.0214192	0.00691533	0.0111734	0.0145947		0.0140634	0.0242609					0.00525278	0.00970004		0.0101346				0.0100282	0.00755796		0.0742031
Criibacterium bergeronii	0.00112282				0.00387657	0.000603076	0.000314597				0.00104578		0.000952609				0.00156961		0.000650384			0.000540393
Culicoidibacter larvae	1.19e-05						1.09e-05
Cutibacterium porci	4.39e-05	1.58e-05			1.41e-05				2.51e-05	1.72e-05			3.93e-05	0.000243917	0.000172931	6.7e-05		0.000358413	0.000145579	0.000125197	6.51e-05	0.0001107						1.73e-05	5.63e-05																			7.48e-06	1.56e-05
Cyclobacterium xiamenense		5.74e-06
Cytophaga aurantiaca	6.03e-06																					1.32e-05
Dechloromonas hortensis															2.07e-05
Deinococcus marmoris	6.34e-06
Deinococcus multiflagellatus																					6.36e-06
Deinococcus xianganensis		8.79e-07		9.46e-07		7.52e-07	6.32e-07			9.02e-07
Dellaglioa algida	0.00026122	0.000290534	2.5e-05	0.000137268		3.29e-06	6.13e-05			4e-06	0.000101502	3.29e-06	0.000301407	4.17e-05	1.73e-05		4.73e-05	8.69e-05	0.000116072	3.21e-05	3.51e-05			0.000416574																								4.15e-05	3.36e-05
Denitrificimonas caeni	4.16e-05					0.00846975					0.000579121	0.000725046	0.00183289						0.00390513			0.00144229	6.98e-05							0.000638355														0.000605663				0.00733109
Denitromonas halophilus																														0.000154158
Dermacoccus abyssi																			3.28e-06
Desemzia incerta						0.00244741					0.00195756		9.94e-05			0.00063905				0.000224251		5.86e-05								2.71e-05
Desertibacillus haloalkaliphilus								1.45e-06													2.55e-06
Desulfitobacterium chlororespirans						3.68e-06
Desulfobulbus alkaliphilus	1.34e-06		1.43e-06	7.76e-07	1.67e-06	8.07e-07	8.55e-07							1.07e-06			1.04e-06	1.44e-06			1.79e-06							4.96e-06														4.55e-05				5.08e-05
Desulfofustis glycolicus											3.82e-06
Desulfohalotomaculum alkaliphilum		0.000111302	3.42e-05			0.000128368					0.000110333			5.04e-06		5.24e-05				8.13e-06					0.000524384	0.000463808															0.000531386
Desulfoluna butyratoxydans									1.74e-06	1.65e-06
Desulfomicrobium macestii	3.56e-06
Desulfonatronum thioautotrophicum																			2.89e-06
Desulfonispora thiosulfatigenes	3.18e-05	1.2e-05	9.41e-06	2.46e-05			1.91e-05	2.04e-05	1.38e-05	1.93e-05	5.19e-06	1.51e-05	2.49e-05	0.000162677	6.93e-05	0.00010817		2.13e-05	4.63e-05	3.2e-05	1.85e-05	9.62e-05	4.88e-05					4.37e-05		7.02e-05
Desulfosporosinus hippei													5.23e-06	3.86e-05	4.55e-06						4.55e-06									4.88e-05
Desulfosporosinus lacus										1.19e-06
Desulfosporosinus metallidurans												6.65e-06									8.3e-06
Desulfovibrio cuneatus	4.26e-06
Desulfovibrio desulfuricans		1.6e-05				3.8e-05					1.15e-05
Desulfovibrio piger	1.41e-06	0.00177868	6.21e-06		6.39e-06	1.53e-06	1.44e-06		3.73e-06	0.000647859	0.00125412	0.00116453	0.00198849	3.24e-06	3.54e-06	0.000627118	0.00165457	6.39e-06	0.00138306	4.54e-06	0.00105764	0.000854868																										3.8e-06	0.00146254
Desulfovibrio porci		0.000247731	0.000221635	8.07e-05		0.000199441	6.12e-06			2.58e-05	0.000353739	2.11e-05	4.21e-05			0.000135031	0.000495403	4.49e-05	0.000367641	1.1e-05	9.21e-06	7.34e-05		5.81e-05																									2.96e-05
Desulfuribacillus stibiiarsenatis												1.38e-06
Devosia elaeis	9.17e-07
Devosia equisanguinis							6.94e-06
Devosia faecipullorum																						9.37e-06
Devosia limi				4.54e-06
Devosia riboflavina																		4.52e-06
Dialister succinatiphilus										0.0110167	0.0143421		0.00605891			0.0207412
Dickeya dianthicola						2.59e-06
Dickeya sp. CSL RW240											7.35e-07
Dielma fastidiosa	9.18e-06
Dietzia aerolata	6.37e-05	1.09e-05	2.78e-05	1.83e-05	1.79e-05	1.48e-05	3.73e-05						1.57e-05	5.28e-06	1.08e-05			9.68e-06	5.37e-06	6.11e-06		2.27e-05	7.84e-05	0.000146357	0.000120225
Dietzia alimentaria	0.000175306	4.55e-05					8.42e-05
Dietzia aurantiaca	0.000430335		0.000163146	0.000161666			0.00115399						2.52e-06		1.01e-05				2.24e-06	3.15e-05		0.000731952	0.00024306	0.000582071
Dietzia cercidiphylli	0.000376032	3.12e-05					0.000120424													9.14e-06		0.000126694	0.000175974	0.000141667
Dietzia cinnamea	8.33e-05						7.27e-05						6.22e-06	5.29e-06					1.42e-05	1.9e-06		1.53e-05	0.000131055	6.68e-05
Dietzia kunjamensis	3.99e-05		6.22e-06			1.25e-05						1.41e-05										9.99e-06								9.73e-05
Dietzia maris	0.000274167	3.52e-06					0.000206378													9.04e-06		0.000124598	3.29e-05	0.000110002
Dietzia natronolimnaea	4e-06	1.17e-05					2.02e-05													6.08e-06		1.24e-05																					0.000223226
Dolosicoccus paucivorans	0.000106656					7.7e-05	4.51e-05				2.83e-05		3.84e-05	3.66e-06		7.11e-05						0.000153395																										8.25e-05
Dorea formicigenerans	0.00423573	0.0259845	0.0262769	0.0332911	0.026197	0.00374311	0.0173126	0.0341729	0.0822048	0.0363729	0.012107	0.0155618	0.0101132	0.0378991	0.0360325	0.0128811	0.00871112	0.00328371	0.0118759	0.0214605	0.00808142	0.00988349				0.0031353		0.00355413			0.00757622		0.0089784															0.00540055	0.00714275
Dorea longicatena	0.00402083	0.0128196	0.0174415	0.0242203	0.0132452	0.0114774	0.00752296	0.0226574	0.0362876	0.0139307	0.00951576	0.00976013	0.00172507	0.00868632	0.0154281	0.00801243	0.0047819	0.00112219	0.00171733	0.00699324	0.00187651	0.00639457	0.0025581	0.00669797		0.00204176	0.00545646	0.00223728	0.0310023	0.00212483	0.00269971	0.00898289	0.00386513						0.00134251	0.000123779				2.43e-05		2.72e-05		0.011358	0.0028655
Dorea phocaeensis	0.00152932	4.38e-05	0.000183939	0.00284462	5.46e-05		0.000104572	0.00315807	8.75e-05	8.07e-05	3.46e-05	2.03e-05	0.000177197	0.00181723	0.00039753	0.000339019	0.000138775	0.000321566	0.000115481	4.97e-05	0.000127074	4.06e-05	0.000152767	0.000277211							0.000456773
Drancourtella massiliensis	1.5e-05	1.14e-05	1.22e-05	3.35e-06	1.19e-05	3.89e-05	1.07e-05	1.59e-05	8.41e-06	1.17e-05	1.36e-05	5.89e-06	1.15e-05	1.55e-05	2.76e-05	5.72e-06	6.29e-06	1.02e-05	1.13e-05	8.67e-06	9.91e-06	7.94e-06						1.21e-05		3.84e-06		0.000171211		0.000125783														2.69e-06	1.02e-05
Duncaniella muris	2.21e-05	3.83e-05	7.05e-05	3.09e-05	0.00011451	9.89e-06	1.26e-05	4.24e-05	5.2e-05	6.9e-05	1.51e-05	2.37e-05	3.88e-05	3.33e-05	4.18e-05	7.1e-06	3.16e-05	2.66e-05	1.58e-05	3.05e-06	5.09e-05	8.67e-06						1.62e-05			4.45e-05											0.000211779						4.93e-06	5.03e-05
Duodenibacillus massiliensis												1.79e-06
Dyella japonica		9.72e-07		1.13e-06			7.26e-07											1.82e-06
Dysgonomonas capnocytophagoides												0.000132037	6.39e-05				1.78e-05		2.66e-05			3.95e-05
Dysgonomonas hofstadii				7.38e-06			0.000191049												0.000896155			0.000158578																										0.000452463
Dysgonomonas macrotermitis						4.41e-05	1.11e-05					7.51e-06	1.75e-05						2.76e-05			1.87e-05
Dysgonomonas massiliensis		4.15e-06					2.27e-05			8.77e-06	6.57e-06	9.82e-06	6.3e-06			4.76e-06	1.4e-05		8.43e-06		1.11e-05	4.05e-06						3.23e-05																					2.12e-05
Dysgonomonas mossii				2.32e-05			4.41e-05					2.89e-05	2.16e-05						0.000260195			3.85e-05																										0.00036732
Echinicola pacifica		1.67e-06
Eggerthella lenta				0.0671408																1.96e-05																									0.000156901
Eggerthella sinensis	1.26e-05	0.000236904	0.000713418		9.38e-05	9.18e-05	2.76e-05		2.21e-05	2.39e-05	7.95e-05	4.69e-05	6.16e-05	0.000297179	6.07e-05	0.000370546	6.67e-05		3.06e-05	0.000144655	6.73e-05	0.000102515	6.84e-05
Eggerthella timonensis							7.31e-06
Eikenella halliae						2.75e-05	9.3e-06
Eisenbergiella massiliensis	1.16e-05	6.85e-05	3.35e-05	1.77e-05	0.000119462	2.44e-05	1.28e-05	7.63e-05	7.12e-05	0.00013297	4.48e-05	2.82e-05	8.27e-05	0.000324254	0.000191434	3.85e-05	1.74e-05	1.18e-05	5.15e-05	0.000131757	3.29e-05	6.14e-05						4.51e-05			5.48e-05			0.000125613					5.88e-05										9.93e-05
Eisenbergiella porci	0.0003045	0.000310893	0.000141777	0.000228434	0.000554901	0.000177731	0.000147618	0.000283448	0.000328271	0.000216348	0.000105073	0.00011479	0.000212211	0.000438288	0.000267952	8.87e-05	0.000192649	0.000518241	0.000328922	0.000147673	0.000214802	0.000138212	0.000206823	0.000541805			0.00395226	0.000113992	0.000465611	0.000189275	0.000221674	0.000342803		0.000422301			0.000239207		0.000583277				0.000896889	0.00018393				1.1e-05	0.000358729
Eisenibacter elegans		3.43e-06								5.96e-06	3.26e-06										9.13e-06
Elizabethkingia argenteiflava	1.31e-05	1.04e-05	2.07e-05	1.69e-05	3.03e-05	7.91e-06	7.58e-06	2.21e-05	2.44e-05	1.95e-05	2.01e-05	1.18e-05	1.3e-05	1.22e-05	1.81e-05	1.46e-05	7.87e-06	5.29e-06	1.31e-05	5.72e-06	2.73e-05	5.34e-06	2.17e-05	3.53e-05		2.13e-05	4.78e-05	1.82e-05	3.49e-05	1.1e-05	7.03e-06		2.41e-05	4.02e-05		2.87e-05	3.61e-05		5.78e-05	4.63e-05	4.44e-05	6.56e-05			2.29e-05	2.44e-05		5.55e-06	2.51e-05
Ellagibacter isourolithinifaciens	0.00161228	0.00261848	0.00135172	0.0018579	0.00025163	0.000625874	0.000373938	0.000533143	0.000607936	0.000208601	0.000178616	0.000205446	0.000774541	0.00127542	0.000903377	0.000345249	0.000139435	0.000306938	0.000539373	0.000357985	0.000889784	0.000478488	0.000351309	0.000281187	0.0001815	0.000144684		7.84e-05		7.99e-05	0.000239056	4.61e-05	0.000103724					0.000264559	8.17e-05					8.97e-05				0.000380904	0.000536848
Empedobacter brevis						1.98e-05	1.98e-05				3.98e-05	0.000632335	0.000139195		2.57e-05		1.88e-05		0.00208272	6.29e-05																								0.0244048	0.000612955			0.000182088
Empedobacter falsenii																			0.000181082
Empedobacter stercoris		2.5e-05	2.28e-05	0.000160437	4.29e-06	0.00422235	0.00110826		9.63e-06	1.26e-06	0.000239408	0.0121019	0.0044675	8.75e-07	3.63e-05	1.58e-06	0.0015443	9.82e-05	0.0208697	0.00194104	4.63e-05	0.00109191														0.00131798	0.00146118		0.00012728					0.00634743	0.000137947			0.00181164	0.000152479
Empedobacter tilapiae											3.95e-05				4.01e-05
Enemella dayhoffiae													2.79e-06
Enorma burkinafasonensis	9.43e-05	0.000106206		7.76e-06	1.11e-05	2.13e-06	1.51e-05	2.57e-05	0.000127439		8.81e-06	2.67e-05	8.63e-05	0.000307892	0.000201081	7.15e-05	8.71e-06	0.000122698	5.55e-05	5.71e-05	6.52e-05	6.41e-05																										3.23e-05	6.2e-06
Enorma phocaeensis	4.18e-05	0.000246799	0.000177716	0.000168951		3.87e-05	3.67e-05	0.000139807	0.000175629	0.000111675	4.31e-05	1.88e-05	6.83e-05	0.000515145	0.000267616	0.000363992			2.55e-05	0.000113645	0.000126521	2.32e-05	0.000147734							9.18e-05																			2.83e-05
Enteractinococcus helveticum																						3.72e-06
Enterobacter asburiae							2.22e-05										1.67e-05																									0.000182992
Enterobacter cloacae															1.34e-05
Enterobacter hormaechei													5.64e-05		0.00298683		0.000126415				7.31e-06
Enterobacter huaxiensis	3.06e-06
Enterobacter kobei														1.98e-05	1.3e-05
Enterobacter roggenkampii																	2.91e-05
Enterobacter vonholyi	1.78e-06						2.44e-06						2.01e-06					5.55e-06
Enterocloster aldenensis		3.93e-05		1.11e-05	4.56e-05			0.000113869	1.19e-05	1.28e-05	0.000219753				1.89e-05	3.02e-05	1.44e-05			2.05e-05																									0.000189308
Enterocloster asparagiformis	5.57e-06		3.7e-06	3.49e-06	2.93e-05			6.67e-06			6.57e-06		5.3e-06	3.59e-05		9.04e-06			5.63e-06	1.16e-05	2.41e-05	2.38e-05
Enterocloster lavalensis		1.12e-05	1.83e-05		1.3e-05		2.11e-06	1.77e-05		1.26e-05	1.77e-05	1.51e-05	1.15e-05	6.6e-06		1.52e-05	2.89e-06				7.76e-06	2.21e-05									3.03e-05
Enterococcus alcedinis	3.34e-05	1.14e-05				9.78e-05	3.04e-06	2.48e-06	2.76e-06	1.07e-05	0.00364639	3.24e-05	0.000131905	1.47e-05	1.94e-05	0.000212716	3.06e-05	3.85e-06	5.49e-05	0.000260258	1.29e-05	8.63e-05								8.37e-05							8.4e-05								4.5e-05			2.19e-05
Enterococcus aquimarinus	0.000201213	5.2e-05		6.08e-06	1.26e-05	0.00104428	0.000368945	4.8e-06		3.25e-05	0.000903786	0.000410919	0.000201707	3.59e-05	5.8e-05	0.00133397	0.00128367		8.31e-05	0.000629142	3.39e-05	0.000140475	0.000380394							0.000194289					0.000159732										9.75e-05			0.000168629	0.00140138
Enterococcus asini													0.00443131					0.00880473
Enterococcus canintestini	1.19e-05																		1.88e-05	1.12e-05
Enterococcus canis	3.18e-05	2.95e-05					9.88e-06				1.12e-05	3.49e-05	0.000180244			0.000186048	3.51e-05	5.14e-05		0.000411617																													8.83e-05
Enterococcus casseliflavus	0.000356046																																															0.000193476	0.000792916
Enterococcus crotali		1.18e-05
Enterococcus devriesei	4.27e-05														1.95e-05									0.000212105																								4.41e-06
Enterococcus diestrammenae	0.00025477	0.000378241	0.00043394	0.00019935		0.000531453	7.8e-05	0.000110261	0.000354228	0.000310379	0.000514211	0.000471389	0.000257644	0.000276365	0.000669893	0.00196105	0.000585896	0.000101552	0.000100528	0.000832016	0.000104921	0.000109821	0.000162486							9.01e-05	0.000151379		0.000490496		0.000383932										0.000203823			0.000236417	0.000677033
Enterococcus dongliensis	1.58e-05	3.03e-05		0.000150879			1.95e-05					1.14e-05	1.79e-05	2.43e-06	1.33e-05	6.7e-06	1.08e-05	4.98e-05		7.64e-05	9.38e-06		2.75e-05																										2.58e-05
Enterococcus durans	0.000101615						1.73e-05				3.02e-05	2.53e-05	4e-05		2.45e-05	8.81e-05	7.62e-06			0.000152014	2.69e-05
Enterococcus faecalis	0.000593343	0.000757355	0.000626892	0.000895916	0.000403836	0.000416406	0.000228006	0.000840425	0.003248	0.00037964	0.000613522	0.000219907	0.000495188	0.00825601	0.000989416	0.000597757	0.000186081	0.00218528	0.000356089	0.000788876	0.000743638	0.000820411	0.000955223	0.00190715	0.00217951		0.00194928			0.000727903	0.000782661		0.00143291	0.000251605	0.000464241	0.000305044	0.00152009	0.00041178	0.000833706			0.000469214	0.00176884	0.000380614	0.000473827		0.00128026	6.17e-05	0.000873813
Enterococcus faecium	0.00123124	0.000703097		0.000360672	0.000662688	0.00144622	0.000454333		0.00045085		0.00211827	0.0021921	0.000373404	0.000779698	5.06e-05	0.00221764	0.000367772	0.000518732	0.000612992	0.00085531	0.000529978	0.0012151		0.000609062							0.00015695						0.0016222				0.000841925		0.00252458		8.36e-05			1e-05	0.00302177
Enterococcus florum	0.000172881	4.51e-05					5.18e-06					8.85e-06	3.48e-05				1.4e-05			8.74e-05	2.81e-05																												0.000336637
Enterococcus gallinarum	9.19e-05	0.000159481		0.000116432						4.51e-05	2.53e-05		0.000891697	0.000243668	7.35e-05			0.0151893	7.95e-05	1.09e-05			0.000208815	0.000161416			0.00125342											0.000429001					0.096746	0.000404252					0.000240759
Enterococcus hermanniensis				2.99e-06								4.39e-06								5.68e-05				0.000130476
Enterococcus hirae																																											0.00119524
Enterococcus hulanensis				3.14e-05								2.07e-05	3.98e-05							1.45e-05	1.01e-05		0.000148814																										4.74e-05
Enterococcus italicus	0.00012007	6.68e-05		5.05e-05		0.000134071	1.33e-05	5.49e-06				3.04e-05	2.37e-05	2.97e-05	6.43e-05	6.03e-05	2.53e-05	3.5e-05	3.82e-05	0.000156102	2.76e-05	9.28e-05	0.000117172	5.72e-05						0.000116392							0.000131821				0.000189606						0.00015345	2.35e-05	0.000161122
Enterococcus lemanii	0.000167867	0.000221594		3.24e-05		0.000808632	0.000178887	1.16e-05		5.8e-05	0.000830723	0.000142588	0.000659672	4.04e-05	0.000140742	0.00173191	0.000274767	1.64e-05	0.000112701	0.00152044	6.73e-05	0.000494482	0.000150143							0.000156707					0.000242035						0.000158797							0.000131003	0.000107444
Enterococcus massiliensis							0.00031052						0.0083504				0.000599531			0.0105364
Enterococcus nangangensis	0.00102691	0.000258686	2.07e-05	6.97e-05			3.13e-05	9.56e-06		2.41e-05		0.000125562	0.000415786	2.72e-05	9.22e-06	2.82e-05	7.64e-05	2.66e-05	0.000302086	0.000171856	0.000213735		0.000685787	0.000403671													0.000554505									0.000130362		0.000104463	0.00503781
Enterococcus pingfangensis		6.88e-06											3.34e-06				3.4e-06	9.03e-06		1.61e-05																													1.81e-05
Enterococcus pseudoavium		0.000164159					0.000665056						5.07e-05				0.00036769			0.000889494																												0.000159016
Enterococcus ratti																																																	2.88e-06
Enterococcus rivorum	1.26e-05	7.2e-06				3.69e-05				4.73e-06	3.02e-05	4.73e-05	3.21e-05		5.49e-06	7.19e-05	4.5e-05	1.07e-05	6.87e-06	8.06e-05		3.8e-05
Enterococcus saigonensis	0.00280647	0.0012222		1.92e-05		0.00401182	0.000856029				0.00259811	0.00029673	0.00177792	1.02e-05	7.29e-06		0.00125049		1.4e-05	0.00148458		1.21e-05																	0.000100261
Enterococcus songbeiensis	2.95e-05	0.000149211		1.6e-05			1.32e-05				2.57e-06	3.53e-05	0.000878368	8.39e-06	1.82e-05	1.53e-05	0.000172583	4.42e-05	8e-05	0.00120368	0.000160772	2.83e-06																							0.000571468			2.1e-05	0.000312114
Enterococcus sulfureus		7.49e-06		7.97e-06								2.32e-06	4.44e-06						3.19e-06																0.000209246
Enterococcus timonensis	0.00318457	0.00093607											0.000615585							0.00124452
Enterococcus ureasiticus														3.72e-06
Enterococcus ureilyticus												2.88e-06	9.38e-06			3.57e-06				5.81e-06
Enterococcus viikkiensis	0.000784779	0.000112151					1.23e-05						1.43e-05	7.93e-06			1.76e-05	3.11e-05	0.000131459	0.000152698	8.65e-05			0.000413282																								3.43e-05	0.00156181
Enterococcus xiangfangensis	0.00135864	0.000484125				0.000675442	7.91e-05											1e-05		0.00123317
Enteroscipio rubneri	1.37e-05			5.11e-05							5.95e-05			3.72e-05	5.45e-05						2.09e-05
Epilithonimonas bovis													1.3e-05
Epilithonimonas hispanica	1.68e-05					1.57e-05	2.46e-06												0.000180487
Epilithonimonas tenax				6.39e-06
Erysipelatoclostridium ramosum				0.017933
Erysipelothrix inopinata	0.0133303						0.0127368						0.0107074				0.00652462			0.0174945
Erysipelothrix sp. HDW6A	0.0173945						0.015778					0.00712701	0.0100266				0.00602989			0.0069772		0.0160019
Erysipelothrix sp. HDW6B						0.00740474	0.00463429				0.00951976									0.00663857		0.00958539
Escherichia coli	0.00560388	0.00287278	0.0232494	0.0246514	0.0325421	0.000709768	0.00815735	0.17614	0.00969666	0.00507256	0.003279	0.00626482	0.00253188	0.024845	0.0154764	0.00886508	0.0122801	0.00500106	0.00540821	1.91e-05	9.73e-05	0.00414564	0.000281233	0.000370986		0.00352735	0.00157395	0.0136247	0.00271381		0.0496683	0.0259741	0.00021662	0.000626026	0.000831558		0.000425524	0.00617632	0.0155094	0.00288963		0.00346999	0.00174046	0.00137233		0.000411645	0.000506858		0.00852504
Escherichia fergusonii				0.00150395	0.00308951		2.37e-05	0.00249997			1.94e-05	2.71e-05	0.000842207	0.00889076	0.0105674			1.61e-06	1.79e-05		3.96e-05	1.17e-05						0.00288868			0.00018254							0.020795	0.00481075			0.000256335							5.09e-05
Escherichia marmotae																							2.54e-05
Escherichia ruysiae																					1.56e-05		4.62e-06
Eubacterium aggregans	0.000149016	4.26e-05		4.69e-05		6.23e-05	4.61e-05			6e-06		1.53e-05	6.53e-05			6.49e-05	5.52e-05		7.95e-05	4.94e-05		0.000174524	4.16e-05	0.000581215						0.000360901												0.000571528		0.000194261					4.47e-05
Eubacterium callanderi							0.00859085
Eubacterium coprostanoligenes	0.000164739	0.000884965	0.00105208	0.000382738	0.00555418	0.000845163	0.000200011	0.000834941	0.00106426	0.00416254	0.00145065	0.000341125	0.000514617	0.000852612	0.00234617	0.00111603	0.00146094	0.000148759	0.000865915	0.000248128	0.000657686	0.000705476						0.00229022	9.86e-05	9.24e-05	4.71e-05		0.00020448				0.00028529		0.00160232	0.000852518						0.000338746		0.000298898	0.000342462
Eubacterium oxidoreducens		6.53e-06	6.67e-06	1.28e-05					2.5e-05	2.22e-05			7.19e-06		8.96e-06						1.29e-05																												7.67e-06
Eubacterium pyruvativorans	0.00201409	0.000420367	0.00238385	0.00122671	0.0129715	0.000878043	0.00165558	0.00664963	0.0104595	0.00306447	0.009066	0.00580752	0.00304149	0.0115157	0.00522589	0.00792625	0.00653153	0.00302513	0.00172593	0.00218102	0.000393023	0.000369814	0.00131847	0.0021304		0.00186469		0.00330087	0.00150724	0.00120121		0.000619149		0.00229743				0.00604636	0.00238857	0.00238436		0.00284315		0.00148881	0.000738125			0.000697238	0.000841603
Eubacterium ramulus	5.19e-05	9.81e-05	0.000136612	0.000432349	4.12e-05	6.3e-05	6e-05	0.000914315	0.000357572	0.000527241	0.000104417	5.79e-05	0.000205751	0.000134246	0.000101408	4.81e-05	6.42e-05	0.000138187	6.14e-06	0.000159464	0.000112785	2.83e-05						5.96e-05	0.000113901																			3.98e-05
Eubacterium ruminantium		4.65e-06	9.38e-06	1.33e-06		5.01e-06			2.1e-05		5.38e-06	1.13e-06		4.93e-06					4.73e-06	3.22e-06		3.32e-06																										2.54e-06	3.36e-05
Eubacterium sp. MSJ-33					0.0290448					0.0145678											0.0117947
Eubacterium uniforme																												1.38e-05
Eubacterium ventriosum		1.67e-05	3.48e-05		6.8e-05	1.93e-05			1.1e-05	1.84e-05	3.98e-06					1.71e-05					1.73e-05	6.52e-06																											3.27e-05
Eubacterium xylanophilum	1.35e-05	8.67e-06	1.1e-05	1.21e-05	1.91e-05	8.26e-06		7.57e-06	6.31e-06	2.51e-05		8.64e-06	5.61e-06	2.65e-05	7.27e-06		1.89e-06		6.62e-06		7.06e-06	9.06e-06						2.28e-05									0.000112101												9.77e-06
Euzebya tangerina												2.63e-06		2.95e-06
Evtepia gabavorous	5.4e-06	2.15e-05	7.49e-05	7.96e-06	0.000174003		9.91e-06	2.72e-05	9.54e-05	9.79e-05	6.43e-05		2.17e-05	3.36e-05	3.62e-05	3.01e-05	3.53e-05	8.07e-06	1.64e-05	7.34e-06	4.21e-05	1.38e-05						6.27e-05	3.03e-05	7.1e-05	1.51e-05											7.59e-05							3.39e-05
Exiguobacterium indicum
Extibacter muris				1.28e-05	6.53e-06		2.51e-06	4.19e-05									3.43e-06	7.11e-06			4.61e-06
Facklamia lactis											6.29e-06											5.09e-05								6.06e-05
Facklamia miroungae						0.000166096										1.3e-05						7.03e-05								3.15e-05
Faecalibacillus faecis	0.00014494	0.00016688	0.000128229	7.11e-05	8.12e-05	4.23e-05	0.000355082	0.000201207	0.00014889	0.000135231	9.08e-05	0.000119701	0.000438944	0.000670421	0.000453787	0.000868155	2.5e-05	0.000275948	0.000175623	0.000771061	0.000216573	0.000315622	0.000119537	0.000219248	0.000180221	0.000496719	0.000494032	9.78e-05	0.000134363	6.55e-05	0.000136482	0.000131391		0.000300769				0.000263039		0.000295514			0.000439399		0.000259691			4.58e-05	7.53e-05
Faecalibacter macacae							0.000315878			6.33e-06	1.24e-05	9.5e-05	1.55e-05		8.34e-06				1.1e-05																													0.00017975
Faecalibacter rhinopitheci							1.61e-05			1.24e-05	0.000607022	5.21e-06								1.98e-06		1.98e-06
Faecalibacterium longum	6.04e-05	7.13e-06	8.55e-05	0.000142489	0.000540126	1.81e-05	0.000610841	0.00184007	0.000987508	0.00022016	0.000254394	0.000117389	6.07e-05	0.000181111	0.00018326	0.000180842	2.73e-05	1.47e-05	5.63e-05	3.4e-05	2.67e-05	3.57e-05						0.000165208	6.73e-05		0.000115905																	5.76e-05	3.17e-05
Faecalibacterium prausnitzii		0.0124833	0.0178748	0.00717172	0.150251	0.0141675		0.028759	0.0319687	0.0579722	0.0643214	0.0350598	0.0157396	0.0137621	0.0112433	0.0308989	0.0240627	0.0127298	0.0142842	0.0109247	0.019251	0.0124359						0.080038
Faecalicatena contorta				3.48e-06			2.87e-06																9.24e-05
Faecalicatena faecalis	0.0012814	0.000823665	0.000416571	0.00200867	0.00384983	0.00130267	0.000843804	0.00186692	0.00218602	0.00203238	0.00157413	0.000750006	0.0010567	0.00295895	0.00258309	0.000957757	0.000693111	0.000977937	0.00128801	0.000322533	0.00101702	0.000554886	0.000391345	0.000330468			0.000362583	0.000816572			0.000845192			0.000169261					0.000436446									0.00078156	0.000354595
Faecalicatena fissicatena	2.45e-05	2.39e-05	4.47e-05	7.41e-05	0.000129919		8.61e-06	7.4e-05	2.39e-05	6.96e-05	3.21e-05	1.55e-05	2.61e-05	6.8e-05	8.53e-05	0.000161348	4.74e-05	5.75e-05	2.87e-05	4.69e-05	4.98e-05	3.02e-05						7.16e-05
Faecalicatena orotica				0.00120715	2.79e-05				4.08e-06		7.72e-06	2.2e-06		1.75e-05	1.05e-05	2.59e-06	2.27e-06				1.16e-05										2.02e-05
Faecalicoccus acidiformans	3.48e-05	5.97e-05	4.9e-05	5.51e-05	3.7e-05	1.75e-05	9.8e-06	2.96e-05	4.19e-05	5.89e-05	3.12e-05	2.46e-05	5e-05	0.00531752	0.00735919	2.43e-05	7.61e-06	0.000323983	4.99e-05	1.09e-05	3.28e-05	3.16e-05			0.000617866		0.000515969												0.00151352										0.000280639
Faecalitalea cylindroides	0.000274637	0.000160522	0.00010389	0.000218028	7.63e-05	3.76e-05	0.00022012	0.000280935	0.000365639	0.000104377	2.87e-05	9.71e-05	0.000433549	0.000182472	0.00023717	0.000305135	4.42e-05	0.000106971	0.000133643	0.00069849	0.00018027	0.000229875	0.000122075	0.000135808				0.000103969			0.000176065	0.000208199	0.000228017	0.000198057						0.000307503			0.000368261					6.08e-05	1.89e-05
Falseniella ignava							1.97e-06						6.4e-06			4.32e-06						5.98e-05
Falsigemmobacter faecalis	4.92e-06	1.94e-06					0.000107284
Falsochrobactrum ovis																			1.01e-05
Ferrovum myxofaciens															4.48e-06																								4.92e-05
Fibrisoma montanum																			4.21e-05			6.63e-06
Fibrobacter intestinalis	0.000374665	0.000240262	9.99e-05	1.87e-05		7.02e-05	3.5e-05			0.000149535	1.52e-05	5.23e-05	0.000232322	0.000214379	0.000208318	6.16e-05	4.93e-05	0.000181282		3.96e-05	5.81e-05	6.87e-05	0.000235122																0.000284996	0.000566239			0.00179807						7.51e-05
Flammeovirga agarivorans	1.15e-06										3.95e-06
Flammeovirga aprica				1.53e-06							7.18e-06																								0.000101134
Flaviflexus ciconiae																						0.0403481
Flaviflexus huanghaiensis		6.14e-06														6.97e-06			9.37e-06			8.2e-06
Flavimobilis rhizosphaerae	5.64e-05	2.23e-05					1.89e-05			1.99e-05			4.02e-05	1.51e-05	2.33e-05				0.000142278	9.7e-05	7.09e-06	0.000241718		0.000215528
Flavivirga rizhaonensis	8.39e-07	7.36e-07	1.28e-06					1.31e-06		8.24e-07
Flavobacterium amnicola	1.27e-05						2.92e-06	6.85e-06						8.59e-06			5.26e-05				3.15e-06																												1.31e-05
Flavobacterium baculatum	1.18e-05					1.7e-05	1.56e-05			1.53e-05									0.000129283			1.13e-05
Flavobacterium croceum												1.01e-05
Flavobacterium dauae		1.84e-06				4.08e-06						2.38e-05	3.07e-05				8.59e-06		2.9e-05	1.21e-05		8.34e-06																										5.49e-06
Flavobacterium hibisci																							5.01e-06
Flavobacterium lutivivi																	1.43e-05
Flavobacterium marinum		2.22e-06										0.000639202	0.000362543						0.000140275	0.000124234		4.35e-05																										6.47e-05
Flavobacterium muglaense		2.81e-06					2.53e-06																																									5.64e-06
Flavobacterium orientale	5.11e-06		1.13e-06	6.41e-06	1.49e-06		2.48e-06		8.93e-06	1.59e-06		6.36e-06		4e-06	3.04e-06	1.74e-06	3.34e-06	4.17e-06	4.09e-06	1.03e-06	1.49e-05	3.72e-06	9.48e-06					1.7e-05
Flavobacterium sasangense												1.03e-05							8.89e-06																													6.92e-06
Flavobacterium tangerinum	4.48e-06	2.19e-05				7.02e-05	1.16e-05				3.72e-05	4.28e-05	3.01e-05				2.81e-05		7.98e-05																		0.000119603											0.000122954
Flavobacterium terrae																	1.24e-05				1.38e-05	8.98e-06
Flavobacterium tibetense	1.47e-05		5.52e-06		1.51e-05	3.46e-06	5.78e-06	7.94e-06	1.92e-05	2.77e-06	2.16e-06	2.46e-06			4.08e-06	2.38e-06	5.17e-06	2.17e-06			1.09e-05	9.55e-07	3.43e-05					3.39e-05	8.38e-05		1.59e-05				4.88e-05			0.000167818	4.91e-05	0.000114706	4.39e-05			3.07e-05		0.000139905	5.78e-05
Flavobacterium ummariense																			7.43e-06
Flavobacterium viscosum	6.76e-06	8.07e-06		5.6e-06		4.05e-06	4.63e-05				2.91e-06	8.49e-06	5.4e-05		7.96e-06		6.19e-06		0.000163967			2.74e-05																						0.000191687				5.01e-05	3.8e-05
Flintibacter sp. KGMB00164						0.00971578								0.0150956
Floccifex porci	0.0018468	0.000745998	0.00110015	0.00105743	2.08e-05	0.000623198	0.000629473	0.00107068	0.000819411	0.000312397	0.000369635	0.00064219	0.00135599	0.00284391	0.00210981	0.00252717	0.000526396	0.000279769	0.00131258	0.00104558	0.00120969	0.00124089	0.00149354	0.000339651		0.00165082		2.57e-05		0.000528079	0.000211895		0.00119276	0.000134116			0.000108565	0.00357374	4.69e-05	0.000224066			0.00193498			0.000111699	0.000260067	4.32e-05	0.000394704
Fluviibacterium aquatile																							1.03e-05																1.61e-05	5.75e-05
Fournierella massiliensis	1.97e-05	2.44e-05	1.61e-05	5.19e-05	2.8e-05	1.29e-05	8.05e-06	4.96e-05	2.44e-05	8.05e-06	7.57e-06	1.42e-05	1.27e-05	0.00464817	0.00569072		8.9e-06	1.32e-05	1.6e-05	7.67e-06	0.00313044	0.00108246						0.00174848	0.00119214			0.000129974						0.0018688	0.00236599	0.00223337						0.00266352		8.67e-06	2.76e-05
Fredinandcohnia aciditolerans				1.04e-06		1.16e-06	7.01e-07		1.92e-06	1.25e-06												2.4e-06
Fredinandcohnia humi				1.59e-06																	1.03e-06
Frigoribacterium faeni															7.47e-06							1.13e-05
Frisingicoccus caecimuris	0.00123954	0.000639785	0.000700203	0.000900167	0.00131121	0.000489406	0.00059878	0.00092313	0.0017094	0.000703486	0.00074306	0.000437712	0.000604709	0.00145015	0.00140955	0.000438087	0.000622364	0.000270021	0.000574978	0.000510008	0.000833322	0.000484014	7.31e-05					1.53e-05			0.000198559						0.000139537		8.54e-05			0.000214346		8.32e-05				0.000166813	0.000183911
Fructilactobacillus lindneri		6.08e-05				2.53e-05	0.00199894													5.67e-05	0.000123985
Fundicoccus ignavus	0.00137262	0.000607926	0.000465039	3.93e-06	2.81e-05	0.00145643	0.000878544			0.000295711	0.00101079	0.000555041	0.000701714	1.16e-05	0.000251658	0.000900381	0.000377145	1.47e-05	0.000918137	0.00114031	7.69e-06	0.00731306	3.81e-05	0.000534344						0.000243716					0.00015951										0.000220702		0.00011466	0.000363332	0.000214464
Furfurilactobacillus rossiae	0.000117156	0.00150367	2.49e-05	0.000228971			0.000765998	5.32e-05	6.05e-06	8.04e-05		0.0059739					0.000534586	0.000105351		2.98e-05	0.00171985		0.000196979	0.000423881	0.00277738		0.00131116							0.00153786								0.00143753			0.000107684	0.00556321			0.000417438
Furfurilactobacillus siliginis	0.000103085	2.92e-05	6.47e-05	1.07e-05		2.74e-06	0.000245417	3.37e-05		1.87e-05		1.07e-05	1.39e-05	0.000147641	4.68e-06		2.26e-05	9.28e-05		5.41e-05	3.38e-05			9.14e-05														0.0012475						0.000117901				3.52e-05	0.000124996
Fusibacter paucivorans	1.86e-05
Fusicatenibacter saccharivorans	0.000676376	0.00252149	0.00498301	0.0032467	0.022963	0.00204898	0.00239764	0.0133411	0.0157544	0.0248854	0.0057055	0.00271452	0.000604524	0.00251217	0.00336762	0.00480477	0.00506078	3.51e-05	0.00100107	0.00185917	0.00217083	0.00105037	5.57e-05			0.000193157		0.00254022	0.000214134	8.86e-05	0.000109513		0.000180134		9.65e-05				0.000174359						5.75e-05	0.000245289		0.00217737	0.00114545
Fusobacterium naviforme		6.52e-05																				0.000107032
Fusobacterium perfoetens																	3.15e-06																															8.63e-06
Fusobacterium ulcerans																	0.00819309
Fusobacterium varium							0.00140233										8.91e-05	0.000176934
Galactobacillus timonensis		0.00234611	0.0028208	0.0025246			2.81e-06				2.58e-05								4.14e-06			0.00202041																											1.04e-05
Galactobacter valiniphilus						7.47e-06				4.87e-06								8.53e-06				4.79e-06
Galbibacter marinus			1.39e-06	3.01e-06		2.97e-06						3.45e-06							5.88e-06			2.4e-06																										6.25e-05
Gallaecimonas xiamenensis																																																6.24e-05
Gallalistipes aquisgranensis																							4.24e-05																										2.93e-05
Gallibacter intestinalis	1.27e-05	2.48e-05	1.21e-05	1.33e-05	5.22e-06	2.76e-06	5.63e-06	6.45e-06	5.75e-06	3.61e-06	4.73e-06	6.77e-06	1.72e-05	2.57e-05	2.99e-05	1.33e-05	3.61e-06	1.59e-05	1.9e-05	2.57e-05	3.82e-05	2.94e-05		0.000105197		0.000139531	0.000191646																					3.46e-06	1.04e-05
Galliscardovia ingluviei		2.17e-05
Garicola koreensis						3.87e-05
Gelidibacter gilvus	2.7e-05
Gelidibacter japonicus						6.64e-06
Gelidibacter maritimus						1.58e-06
Gelidibacter mesophilus										2.31e-06
Gelidibacter pelagius	6.64e-06					4.49e-06
Gelidibacter sediminis		9.22e-06
Gemmiger formicilis	0.000818333	0.00312515	0.0121575	0.00669245	0.00305869	0.00163499	0.00295266	0.00711975	0.012833	0.00673535	0.00787483	0.00567836	0.002935	0.0181511	0.0197507	0.00498442	0.00302058	0.00114755	0.00285356	0.00365954	0.00396582	0.00158895	7.8e-05	8.28e-05	5.87e-05	0.000165818	0.000171463	0.000196293		1.68e-05	0.00110519	8.07e-05	0.00431296	8.12e-05	5.14e-05				0.000124675	8e-05			0.000489993	0.000159513				0.00105321	0.0012301
Gemmiger gallinarum	0.000139014	0.000629244	0.000690258	0.000355788	0.000200029	0.000247557	0.000133538	0.000525049	0.00111497	0.000377406	0.00029108	0.000296818	0.000156799	0.001148	0.00129261	0.000431762	0.000135535	0.000656788	0.000364958	0.000305894	0.000574401	0.000349146	4e-05	0.000127645	0.000170686	0.000132697		3.41e-05		4.79e-05	7.55e-05		0.00109608				7.48e-05						0.00963397					9.66e-05	0.000283452
Gemmobacter caeni	4.25e-06						1.02e-05															4.15e-06
Gemmobacter intermedius	2.12e-05	1.45e-05				4.28e-06	2.42e-05										9.18e-06		1.31e-05			6.18e-06																										2.03e-05
Gemmobacter megaterium																			1.55e-05
Gemmobacter serpentinus		1.08e-05
Geofilum rhodophaeum							1.8e-05						2.66e-05				1.44e-05		7.29e-05			4.21e-05
Geofilum rubicundum	5.49e-06									5.77e-06		2.4e-06			2.94e-06		3.14e-06				6.25e-06
Geomesophilobacter sediminis										3.47e-06
Geosporobacter subterraneus										5.12e-06
Glaesserella parasuis									7.08e-06												1.26e-05
Glaesserella sp. 15-184											4.48e-06																												7.8e-05
Gleimia coleocanis											4.48e-06
Globicatella sanguinis	0.000651095	4.21e-06	5.67e-06		4.06e-06	0.000316542	8.73e-06				3.54e-05	3.88e-05	8.38e-05		4.07e-06	0.000224948	8.71e-06		0.000376409	2.78e-05		0.000127231	0.000808068	0.000571868																				0.00026744	0.000322512			3.34e-05
Globicatella sulfidifaciens			6.19e-05	0.000425507	0.000718973	9.39e-05		0.000304724	0.000371363	0.000148853		0.000334267	0.000368584	0.000283744	0.000315157	0.000326975	0.000432127	0.00167411		0.000595616	5.81e-06	0.000286483																										8.08e-05	0.000277371
Glutamicibacter ardleyensis						1.53e-05					2.51e-05					1.57e-05
Glutamicibacter arilaitensis						0.000210826																0.00032199																										0.000102242
Glutamicibacter protophormiae		0.00730706																				0.0339798																										0.0156394
Glutamicibacter uratoxydans										1.68e-06
Gordonia desulfuricans	3.91e-05
Gordonia hirsuta	0.000487435						3.15e-05																0.000326117	0.000382935
Gordonia jacobaea																					6.67e-06	1.14e-05
Gordonia malaquae	2.24e-05																						2.06e-05
Gordonia sihwensis	0.000142212																						6.81e-05
Gordonibacter pamelaeae		2.74e-05	4.07e-05	1.9e-05		2.44e-05				8.57e-05	1.33e-05		3.41e-05	2.98e-05								1.03e-05
Gottschalkia purinilytica						4.81e-06					1.89e-06
Gracilibacillus lacisalsi																		4.04e-06			7.55e-06
Gramella bathymodioli	1.28e-06									1.48e-06								1.67e-06
Gramella jeungdoensis				1.57e-06														3.07e-06
Granulicatella balaenopterae	3.83e-05	9.45e-05	6.49e-05	0.000103081	6.63e-05	4e-05		9.69e-05	0.000111775	4.2e-05	1.4e-05	9.02e-05	0.000252257	0.000177087	0.000248031	0.000236228	2.78e-06	9.25e-06	0.000118526	0.000195095	0.000111948	0.000117513									6.81e-05								4.33e-05			0.000227181						8.1e-06	4.63e-05
Gulosibacter macacae	0.000138214						1.27e-05
Gulosibacter molinativorax	2.98e-06			1.94e-05		2.48e-05	4.45e-06															2.69e-06
Haematobacter missouriensis		3.93e-06
Hafnia paralvei												9.59e-06
Hallella seregens	8.32e-06	1.7e-05	2.63e-05	5.12e-06	6.61e-05	3.98e-06		5.59e-06	4.28e-05	5.02e-05	1.56e-05	2.37e-05		1.51e-05	8.54e-06	7.21e-06	3.87e-06	4.73e-06	9.63e-06	3.2e-06	6.43e-05	8.29e-06	1.95e-05					2.21e-05			1.61e-05															8.34e-05			4.47e-05
Hallerella porci	6.42e-05	4.04e-05	6.43e-05	3.57e-05	0.000425686	0.00019375	7.81e-05	0.000212199	0.000376043	8.88e-05	5.82e-05	8.66e-05	5.75e-05	3.85e-05	5.64e-05	4.2e-05	9.31e-05		4.17e-05	1.78e-05	0.000152776	4.22e-05	0.000105415					0.000314445		5.31e-05	0.000178466								5.69e-05									1.31e-05	6.84e-05
Halobacillus dabanensis	2.19e-06									3.76e-06											4.4e-06
Haloimpatiens lingqiaonensis	5.61e-06	0.000447495		3.15e-06			2.34e-06				4.05e-06								1.47e-05				4.74e-05
Haloimpatiens massiliensis		6.22e-06															4.82e-06																																8.33e-06
Halolactibacillus halophilus						3.49e-05					1.37e-05	5.2e-06	6.53e-06				3.62e-06					5.31e-06
Halomonas aquamarina											1.53e-05								1.79e-05
Halomonas axialensis																							6.44e-06
Halomonas heilongjiangensis								2.14e-05																				0.00018292
Halomonas litopenaei																																																3.24e-05
Halopseudomonas formosensis						5.45e-06
Halopseudomonas pachastrellae											0.000120178	1.63e-05
Halopseudomonas xiamenensis						0.000179899																																										0.000237403
Haploplasma modicum		3.1e-06					5.38e-06						3.07e-06						6.66e-06		2.55e-06	4.18e-06
Hathewaya proteolytica													3.72e-06									8.6e-05	3.76e-05
Helcococcus massiliensis						9.52e-06										2.32e-05						7.49e-05	5.56e-05							8.81e-05																			2.29e-05
Helcococcus ovis				4.77e-06		4.04e-06				4.93e-06		3.4e-06	3.82e-06						9.99e-06	6.91e-06		1.91e-05																									0.000106291	7.86e-06
Helcococcus sueciensis												4.49e-06	3.61e-06							4.7e-06
Helicobacter canis																5.14e-05
Helicobacter equorum			2.86e-05	3.8e-06	2.12e-05		5.17e-05	0.000113611	0.000853303		1.27e-05	1.56e-05	7.84e-05	3.15e-06		2.49e-05	3.05e-05	5.06e-05		2.1e-05	1.02e-05												0.000104601																3.04e-05
Helicobacter ganmani											4.55e-06
Helicobacter magdeburgensis										1.3e-06
Helicobacter rodentium			6.71e-06																		9.05e-06
Helicobacter trogontum				7.37e-05			4.24e-06	7.8e-05			1.42e-05	1.92e-05							1.52e-05	1.36e-05	1.75e-05
Heliobacterium chlorum																					2.62e-06
Heliomicrobium gestii										1.44e-06
Heliorestis acidaminivorans														3.54e-06								5.64e-06
Heminiphilus faecis	5.99e-05	2.17e-05	3.06e-05	3.4e-05	0.000129874	4.58e-06	2.47e-05	3.64e-05	4.21e-05	8.84e-05		1.88e-05	1.41e-05	4.8e-05	5.41e-05	3.03e-05	7.99e-05	9.35e-06		1.17e-05	9.8e-05	1.4e-05						9.26e-05																					0.000120085
Henriciella mobilis																			3.33e-06
Herbinix hemicellulosilytica															2.91e-05	4.88e-05
Hespellia stercorisuis	0.0018883	0.000571323	0.000971519	0.00167475	0.00299144	0.000670964	0.00073614	0.00308751	0.00342188	0.00106033	0.000677809	0.000760071	0.000672423	0.0032352	0.00229811	0.000851356	0.000536963	0.000117591	0.00020105	0.000670995	0.00060417	0.000292582	0.000395764	0.000128567		0.000199098	0.00639767	0.000688145	0.000832129	8.06e-05	0.000367378		0.000204345					0.000232987				0.000250101	0.000376847	9.75e-05	7.59e-05	0.00043536		0.000612669	0.000252829
Holdemanella biformis	0.000828355	0.00112206	0.00100075	0.00202046	0.000941123	0.000270515	0.00122564	0.00162453	0.00142512	0.000691301	0.000332502	0.000773231	0.000906987	0.00161863	0.00135736	0.00193626	0.000351355	0.000458679	0.000554321	0.00169138	0.000890945	0.000681637	0.000311981	0.000397141	0.000493882		0.000806685	0.000191123			0.000474076	0.000934715	0.000590862				0.00051094	0.00142097	9.76e-05	0.00031609	9.39e-05		0.00307702	0.000110215		0.000226064	0.00188875	0.000387857	0.000161733
Holdemanella porci	0.00203776	0.0027494	0.0022306	0.00417857	0.00183525	0.000755606	0.0030669	0.00367457	0.00319628	0.00159272	0.000797135	0.00177007	0.00210514	0.00349469	0.00296098	0.00441104	0.000804114	0.00103327	0.00158295	0.00367032	0.00204703	0.00157219	0.00135739	0.00167251	0.00154623	0.00228242	0.00298906	0.000918013	0.00215241	0.000878704	0.00141098	0.0016778	0.00211436	0.00151282	0.000921947	0.0017504	0.00170047	0.00241565	0.000807149	0.00217228	0.00125226	0.00318643	0.0052541	0.00178739	0.0014781	0.00063792	0.00164996	0.000857056	0.000867736
Holdemania filiformis				0.000196264			0.000193567											0.000474191
Holdemania massiliensis	0.000106539	0.000201424	0.000572355	0.000507362	7.87e-05	0.000269664		6.51e-05	0.000434901	0.000283731	4.35e-05	0.000122643	0.000197141	0.000275753	0.000330093	0.000666987	3.89e-05	6.95e-05	0.00032577	0.000199591	0.000157476	0.000102717	2.48e-05								0.000127018							0.000560858											0.000121941
Holzapfelia floricola													3.47e-06
Hornefia butyriciproducens	0.000630674	0.00402074	0.000512557	0.00052679	0.00101113	0.000131566	0.000316047	0.00128059	0.000388486	0.000115412	0.000286635	0.0006376	0.000149529	0.00156989	0.000498631	2.27e-05	0.00021582	8.53e-05	0.00399151	0.000321419	0.000301005	0.000443314	0.00634664	0.00309159	0.00128085		0.00543418	0.00144579	0.000382464	0.00012901	0.00238501	0.000228626				0.000581496		0.0052645	0.00200738	0.000764707			0.00193697	0.00890098			0.00215368	0.000108104	0.00158595
Hungatella hathewayi			2.49e-05		1.14e-05				1.17e-05		3.75e-06			3.75e-06				5.98e-06	1.73e-06	5.65e-06	5.44e-06	2.14e-05																		4.44e-05
Hungatella xylanolytica													1e-05	4.72e-06	1.45e-05						9.61e-06
Hutsoniella sourekii			9.36e-05			8.56e-05					3.57e-05	3.73e-05				0.00013321				9.33e-06		0.00013064																										5.48e-05
Hydrogeniiclostidium mannosilyticum		7.48e-06	1.65e-06	1.95e-05	1.75e-05					4.13e-06	1.02e-05	1.82e-05	1.24e-06	2.84e-05	1.6e-05	1.07e-05				5.42e-06	1.68e-06	1.34e-05																											6.71e-06
Hydrogenoanaerobacterium saccharovorans		9.32e-05	0.000157637	9.85e-05	0.000201003		5.84e-05		2.98e-05	6.38e-05	0.000221349	2.6e-05		0.000419079	0.000326015	4.32e-05	5.87e-05	2.29e-05	0.000131671	1.03e-05	0.000116733																												7.06e-05
Hymenobacter jeollabukensis										1.09e-05					5.92e-06
Ideonella sakaiensis																																																	4.57e-06
Ignatzschineria cameli	1.21e-05	7.61e-05	0.00016263	4.8e-05		0.000417953	0.000222087			1.74e-05	8.59e-05	0.000148519	6.24e-05	8.27e-06	1.87e-05	1.15e-05	1.09e-05		3.83e-05		6.96e-06	0.000105199																						0.000206201			0.000415513	0.00040779	3.03e-05
Ignatzschineria indica	2.09e-05	3.1e-05	5.15e-05	0.0016094	1.1e-05	9.56e-05	0.000137701			1.71e-05	7.12e-05	0.000235147	1.81e-05	8.1e-06	6.07e-06				8.09e-05		1.97e-05	2.87e-05								8.76e-05																		0.000303818
Ignatzschineria larvae			4.9e-05			2.12e-05	2.25e-05				4.45e-06	1.41e-05										6.52e-06								2.7e-05																		1.91e-05	9.49e-06
Ignatzschineria ureiclastica	4.4e-05	4.12e-05		1.72e-05		0.000948949	4.18e-05				6.72e-06		0.000342002			5.07e-06	1.13e-05	1.55e-05	0.00029066	9.18e-07	3.27e-06	0.000227301								0.00022088																		0.000175394
Ignavigranum ruoffiae																		0.000456741					5.01e-05																				0.00072763
Inconstantimicrobium porci	3.41e-06	1.93e-05	3.14e-05	5.28e-05		4.04e-05	1.6e-05		4.04e-05	8.83e-05	5.51e-05	3.79e-05	3.56e-05	3.66e-06	3.76e-06	1.59e-05	1.49e-05	1.11e-05				7.8e-06	5.78e-05	0.000169645			0.000142681												5.4e-05				0.000730083	7.87e-05
Intestinibacillus massiliensis	3.68e-05	6e-05		0.00028872	2.71e-05		9.52e-05		3.9e-05	1.09e-05	6.68e-06	1.04e-05	3.65e-05	0.000140139	2.28e-05			0.000127819	1.17e-05		3.63e-05	4.99e-05						3.03e-05
Intestinibacter bartlettii	5.5e-05	0.000141222	0.000338157	0.000788802		2.05e-06		0.000264496	0.000213221	3.48e-05	1.09e-05	8.9e-05	7.54e-05	8.75e-05	8.53e-05	0.000293725	1.81e-06		4.8e-05	2.16e-05	1.89e-05	7.69e-06	0.000163112			0.000110826	0.00175842						0.00163281												8.2e-05			7.58e-06	4.38e-05
Intestinibaculum porci
Intestinimonas butyriciproducens				0.0307986
Intestinimonas gabonensis			1.59e-05	2.36e-05	9e-05		2.37e-05	2.76e-06		7.98e-05				1.48e-05	3.99e-05						1.3e-05																												0.000118667
Intestinimonas massiliensis	2.17e-05	0.000204063	0.000155857	0.0122478	7.38e-05	0.000113557	0.00573296		6.99e-05	0.000126277	0.000125035				0.000133329	0.000376675			5.05e-05		0.000151824	3.21e-05																											7.67e-05
Intestinimonas timonensis	1.8e-05	2.24e-05		2.63e-05	0.00224216			8.29e-05	2.49e-05	1.72e-05		1.08e-05	0.000176866	4.51e-05	3.27e-06		3.96e-06		3.27e-05	7.76e-06	2.2e-05
Intrasporangium chromatireducens	2.57e-05
Isachenkonia alkalipeptolytica											2.77e-06
Isobaculum melis						3.76e-06										2.39e-06				2.68e-06										3.07e-05
Isoptericola sediminis				9.32e-07
Janibacter anophelis
Janibacter endophyticus						4.5e-06
Jeotgalibaca arthritidis	0.011444	0.00869731		0.00748379		0.13014	0.0163785				0.0998955	0.466213	0.0224484			0.0173003	0.0281936			0.105245		0.0460899																										0.0232691
Jeotgalibaca dankookensis	5.43e-05					0.000165759					1.51e-05	2.84e-06	5.05e-06		3.79e-06	0.00642297				1.26e-05		1.2e-05								3.18e-05											0.000131155
Jeotgalibaca porci	0.209449	0.0596379	0.0151161	0.000358102	0.0223957	4.59449	0.0294571	0.0151521		0.00809631	1.53174	0.234453	0.110923	0.00990065	0.00898393	3.15009	0.0175508		0.0162553	0.28785		0.371367	0.0461634							0.550024					0.318356						0.390665							0.131202	0.0169102
Jeotgalibaca sp. PTS2502						0.0358837
Jeotgalibacillus proteolyticus						8.42e-06							1.04e-05			0.000125114	0.000172319		4.34e-05				0.000203005														0.00082222	0.000476442
Jeotgalicoccus aerolatus		0.00177047	0.00219854				0.000448985				0.00460306	0.00688536	0.000289269	1.22e-05	2.26e-05	0.0442979				0.00366242		0.0214747																									0.000529501
Jeotgalicoccus coquinae						0.00182508					2.68e-05	1.66e-05				0.00153267				5.82e-06		6.04e-05								0.000106601					0.00016671												0.000325593
Jeotgalicoccus halotolerans						1.68e-05					6.52e-05	6.83e-06	2.07e-05		5.34e-06	0.000111674			5.64e-06	3.35e-05		0.000354154													0.000340178						0.000876477			0.000154365
Jeotgalicoccus meleagridis		1.58e-05				6.82e-06					5.7e-05	1.97e-05	1.5e-05		6.09e-06	2.89e-05		7.62e-06		3.33e-05		8.87e-05													0.000314146												0.000626385
Jeotgalicoccus psychrophilus						0.000842375					0.00139916	7.47e-05				0.00106985						0.000602886													0.000617548
Jeotgalicoccus schoeneichii						0.000364814
Jeotgalicoccus sp. WY2						0.0131436					0.0241877					0.0213092						0.00976645
Jiulongibacter sediminis																	1.27e-06
Kaistella chaponensis						1.2e-05	2.91e-06
Kiloniella litopenaei						0.000885866													1.5e-05
Kineobactrum sediminis																																										6.25e-05
Kineococcus rubinsiae												5.04e-05
Klebsiella grimontii																	1.28e-05
Klebsiella oxytoca						6.44e-05								0.0076901	0.00477914																	0.000276999						0.00473437	0.00145887			0.00107576
Klebsiella pneumoniae	0.000732534	1.16e-05	0.000260213	5.96e-05	0.00177466	2.58e-05	1.62e-05	0.00267404		9.62e-06	1.74e-05		2.54e-05	0.0010918	0.000890393	1e-05	8.01e-06	0.00039488	3.48e-05	5.02e-06	1.38e-05	3.83e-05		5.1e-05		0.00658815	0.000587047	0.000387498		0.000100917	0.00148874	0.000451079					0.000820612	0.0025984	0.000365742	0.000468059		0.000463713	0.000407356	0.000193582				1.36e-05	2.25e-05
Klebsiella quasipneumoniae	0.530741	0.584651	0.421657	0.571669	0.156317	0.152346	0.119366	0.744021	0.339882	0.248272	0.306201	0.154307	0.315934	0.259413	0.28577	0.276921	0.222309	0.150759	0.166867	0.0632112	0.155782	0.0568857						0.00367524	0.00176652																			0.0614171	0.0532067
Klebsiella sp. WP3-W18-ESBL-02																	6.22e-05
Kluyvera georgiana	0.000201107						0.000237251							0.000353057	0.000484304						2.28e-06
Kluyvera sichuanensis							0.00182776																					0.00105614																1.34e-05
Knoellia aerolata	4.14e-06																	5.25e-06				4.92e-06
Kocuria atrinae				8.15e-06		4.77e-05	1.5e-05		4.59e-06	1.1e-05	7.86e-06	2.54e-05	5.87e-06			6.01e-06						3.24e-05
Kocuria carniphila				3.72e-06		4.3e-05	5.46e-05		2.46e-05							6.81e-06						3.99e-06
Kocuria salsicia					1.13e-05	9.55e-06	0.000679656	9.2e-06											4.61e-05	0.000126211
Kocuria soli						5.26e-06
Kocuria subflava	1.98e-05			2.08e-05		2.15e-05							1.9e-06				4.52e-05					3.03e-06
Kocuria varians	3.48e-05					3.84e-06														3.45e-06		2.26e-06		0.000213027
Komagataeibacter oboediens		7.63e-07	1.45e-06	1.24e-06				3.84e-06	2.21e-06		1.03e-06			1.34e-06	4.69e-06	1.45e-06				2.58e-06	1.01e-06	1.27e-06
Kordiimonas sediminis											8.72e-06
Krasilnikoviella flava											7.51e-06
Kurthia gibsonii											1.15e-05	0.000170864		1.6e-05		3.6e-05	1.7e-05		4.64e-05	1.84e-05										6.23e-05
Kurthia huakuii		0.000326342	1.19e-05		8.19e-06	0.000961789	0.000544691		5.24e-05	0.00286718	0.010343	0.0678608	0.00217214	0.00116001	3.18e-05	0.0240893	0.0120347	3.5e-05	0.00510628	0.00959002	0.0020627	0.00876518			0.000562754					8.07e-05				0.000746368	0.00441811	0.0221966	0.00163254				0.00104391	0.0177699		0.0139211	0.00795615		0.00883058	0.00356255	0.000136841
Kurthia massiliensis						1.24e-06	5.21e-07				1.91e-06	6.41e-06	5.18e-06	1.17e-06	1.45e-05	1.54e-06	4.98e-06		2.68e-06	1.92e-06		1.38e-06														1.69e-05	2.63e-05
Kurthia senegalensis		6.69e-06				1.98e-05	1.05e-05			3.71e-05	0.000176024	0.0027286	0.00300539	4.58e-05	3.78e-06	0.00107125	0.000793929		0.00035319	0.00145531	3.41e-05	0.000238119													0.00197505	0.00441882	0.00307647	0.000184026	0.000315676		0.00124763	0.00512037		0.00345437	0.000956621		0.00176083	7.01e-05
Kurthia sibirica						6.21e-05					5.18e-05	2.44e-05	5.11e-05			9.33e-05			1.46e-05	2.33e-05										0.000251027					0.000710817						0.00110423			0.000208918	0.000214963			6.1e-05
Kurthia zopfii	0.00159936	3.18e-05	1.94e-05		0.000128394	0.00378276	2.96e-05			1.67e-05	0.00302429	0.00201863	0.000106883	1.49e-05	2.8e-05	0.0233278	0.000144684		0.000204328	0.000774897	2.19e-05	0.000444005	0.00480869	0.00153444						0.00023946	0.000229824				0.000622754		0.00112112				0.00296904							0.00239641	0.000231318
Labilibacter sediminis		2.95e-06	5.09e-06	1.28e-05	4.71e-06	6.92e-06			3.07e-06		4.82e-06	1.15e-05	5.96e-06	6.21e-06	1.56e-06		4.91e-06	2.45e-06	5.53e-06	1.76e-06	8.98e-06	6.06e-06	1.35e-05							1.89e-05			4.19e-05						2.75e-05										6.17e-06
Lachnoanaerobaculum saburreum					4.79e-06					3.71e-06		2.31e-06
Lachnobacterium bovis	2.44e-06			1.09e-05		5.46e-06				6.1e-06
Lachnoclostridium pacaense													6.92e-06								4.32e-06
Lachnospira eligens		0.00803056	0.0174053			0.0135556			0.0125702	0.0305498	0.0084246	0.00690719				0.0115655																																	0.0119104
Lachnospira multipara	5.53e-06	8.09e-05	0.000240535	1.47e-05	0.00102017	0.000513334		9.12e-06	0.000242858	0.000188138	8.56e-05	9.71e-05	9.42e-06	0.000238017	8.79e-05	0.000104336	7.64e-05	0.00130928	9.1e-06	1.99e-05	3.09e-05	0.000185442									6.08e-05
Lachnospira pectinoschiza	2.03e-05	2.39e-05	2.79e-05	1.09e-05		1.9e-05			7.99e-05	4.45e-05	1.51e-05	2.36e-05	3.32e-05	1.62e-05	2.3e-05	1.76e-05	5.09e-05		2.99e-05	1.74e-05	2.3e-05	5.31e-06																											1.52e-05
Lachnospiraceae bacterium NSJ-29				0.010668										0.0290898
Lachnospiraceae bacterium NSJ-4		0.00911486			0.0528687									0.0281309
Lachnotalea glycerini			2.84e-05	4.75e-05			1.06e-05										1.41e-05		1.96e-05									8.45e-05
Lacisediminihabitans profunda			2.9e-06	1.7e-06					2.29e-06		7.32e-07				7.8e-07			1.65e-05	7.16e-06			8.11e-07
Lacrimispora algidixylanolytica	5.11e-06				1.14e-05				8.5e-06	3.22e-06								6.32e-06
Lacrimispora amygdalina		1.58e-05			5.36e-06				4.63e-06					3.44e-06			4.05e-05		2.7e-05
Lacticaseibacillus camelliae	7.09e-05	0.000139233		8.55e-05			2.39e-05			8.03e-05		9.24e-05	9.05e-05	1.48e-05			0.000228964	9.87e-05	1.2e-05	6.09e-05	7.19e-05																											0.000306043	0.000400329
Lacticaseibacillus daqingensis	3.64e-05	0.000181516					0.00025279			9.92e-05				2.91e-05	7.72e-06		0.000151846	6.89e-05	0.000194731	0.000202547																												0.000264722	0.000697405
Lacticaseibacillus hegangensis	9.04e-05	0.000260696	6.81e-06	7.2e-06			7.89e-05	1.16e-05		8.98e-05		4.72e-05	0.000152742	5.22e-05	4.86e-05		0.000393254	6.55e-05		0.000142279	1.44e-05		3.62e-05																							0.000165163		0.000179406	0.000783739
Lacticaseibacillus hulanensis		3.74e-05				9.33e-06	0.000231206			2.73e-05		5.96e-06	2.21e-05		1.91e-05		8.37e-05	0.000537979		0.0004533	0.000205815																											2.09e-05	4.78e-05
Lacticaseibacillus jixianensis	1.42e-05	9.81e-06		3.57e-06			1.75e-05			1.62e-05		4.81e-06	7.23e-06	3.89e-06			7.2e-05	2.14e-05		5.62e-05																												4.29e-06	4.81e-05
Lacticaseibacillus manihotivorans		0.0028662		5.84e-05		4.93e-06	0.0076658	6.46e-05		0.00276712		7.02e-05	4.82e-05	4.32e-05	2.91e-05	7.49e-06	0.00554636	0.000169475	1.29e-05	0.0015481	4.8e-05				0.000176965																	0.00171715	0.000388805					0.00192473	0.00473145
Lacticaseibacillus mingshuiensis							4.29e-05			7.43e-06							4.28e-05			4.5e-05
Lacticaseibacillus nasuensis		9.57e-06								1.81e-05		9.79e-06					2.26e-05	1.75e-05		4.82e-06	6.44e-06																												1.4e-05
Lacticaseibacillus pantheris							1.19e-05			3.92e-06				6.96e-06			1.96e-05		9.22e-06	4.63e-06																													9e-06
Lacticaseibacillus paracasei	0.000707889	0.00017329		0.00020774			0.00121278	4.25e-05		6.95e-05		4.14e-05		6.47e-05		3.73e-05	0.000124645	0.000367288		0.000225614					0.00101726							0.000528504										0.00114306						0.000193694	0.000224459
Lacticaseibacillus porcinae		0.000311893										2.44e-06		1.65e-05			3.38e-06	2.95e-05		1.02e-05	3.51e-05																												7.68e-05
Lacticaseibacillus saniviri	1.3e-05	8.68e-05		1.04e-05		4.42e-06	8.62e-05	8.82e-06	1.51e-05	7.1e-05		0.000159818	1.58e-05	1.42e-05			0.000209356	7.54e-05	9.52e-06	0.000115888	3.9e-05						0.000288873							3.55e-05														0.00014212	0.000236228
Lacticaseibacillus sharpeae		3.7e-05		9.75e-06			0.000144328	5.07e-06		0.000152364		1.54e-05	1.21e-05	1.63e-05	2.39e-05		9.4e-05	8.87e-05		0.000182437	2.43e-05																											3.27e-05	0.000127916
Lacticaseibacillus songhuajiangensis	1.19e-05	7.93e-05		5.86e-05	6.62e-06		5.98e-05		6.07e-05	0.000117402		1.07e-05	0.000158811	6.23e-06	3.37e-06		7.01e-05	0.000143608	1.13e-05	0.000187757	0.000418202	0.000659906		0.00317776								0.000365356		0.000219257			0.000762096			0.00113442								6.47e-05	9.94e-05
Lacticaseibacillus suibinensis		0.000134914		9.63e-06	5.03e-05	1.54e-05	9.51e-06			0.000229952		2.24e-05	0.000122276	0.000549994	0.000336635		0.000167672	0.000112142	4.48e-05	3.34e-05	0.000121305	6.48e-05						0.000214901																					5.83e-05
Lacticaseibacillus suilingensis	0.00182531	0.000198416	9.69e-06	1.83e-05			3.23e-05	0.000157136	4.5e-06	8.62e-05		0.00028895	0.00010361	1.9e-05	4.18e-06	1.1e-05	0.000122735	0.000166354	5.61e-05	9.01e-05	0.000117023		0.00106367	0.000493793	0.000172314																	0.000231031				0.000183546		0.000543914	0.00103076
Lacticaseibacillus yichunensis	4.99e-06	3.91e-05		1.37e-05			0.000162581			6.06e-05		3.41e-05	9.58e-06	6.03e-06	1.42e-05		0.000131627	2.54e-05	1.2e-05	0.000112745	3.99e-06																											2.96e-05	0.000133985
Lacticaseibacillus zhaodongensis	2.47e-05	8.5e-05					3.04e-05			4.82e-05		0.000139483		8.13e-06			9.34e-05	5.53e-05	5.89e-06	0.000163963	9.58e-06																					0.000249734						4.82e-06	0.000256866
Lacticigenium naphthae						3.92e-05																0.000157199
Lactimicrobium massiliense				0.00132142							0.000917103						3.6e-05
Lactiplantibacillus argentoratensis							8.54e-05								1.26e-05		3.02e-06	3.95e-05					1.3e-05
Lactiplantibacillus daoliensis							1.87e-06					5.98e-06
Lactiplantibacillus daowaiensis	0.000322588	5.58e-06		3.63e-05			0.000139713	0.000194668						8.22e-06	6.24e-06			0.0005566	8.89e-05	7.47e-05	1.93e-05	2.71e-05	6.68e-05	0.000186267									0.000319804															6.22e-06	7.01e-05
Lactiplantibacillus dongliensis				3.85e-05			2.11e-05											9.12e-06																														0.000118048
Lactiplantibacillus garii		2.24e-05					6.32e-05			0.000382491			0.000768827			0.000199636	3.84e-05				0.00156107	0.000664238																											1.42e-05
Lactiplantibacillus herbarum														4.85e-05	4.77e-05		6.41e-06				2.69e-05
Lactiplantibacillus modestisalitolerans										4.12e-05
Lactiplantibacillus mudanjiangensis																	5.62e-06
Lactiplantibacillus nangangensis	3.3e-05	7.3e-05		1.26e-05		5.48e-06	0.000151061			4.73e-05		2.98e-05					2.89e-05	2.58e-05	7.12e-06	2.79e-05	0.000137956		0.000624998	0.00021645																								3.31e-05	5.71e-05
Lactiplantibacillus paraplantarum	9.26e-05	0.000345545		0.000421756			0.000225266	9.41e-05		0.000224247		0.000183839		0.000159585			0.000335196	0.000256255		0.000279138	0.000374506													0.00134468			0.00110108												0.000873603
Lactiplantibacillus pentosus	4.2e-05	2.31e-05		2.52e-05			8.81e-05			0.000102309		3.81e-05					4.4e-05	0.000778382		7.84e-05	0.000315158																						0.0151806
Lactiplantibacillus pingfangensis		0.00023979		1.91e-05			2.74e-05					2.55e-05					0.000147543	0.000103923		2e-05					0.000641702																							2.79e-05	0.000163447
Lactiplantibacillus plajomi	3.1e-05	7.7e-05		4.98e-05			3.28e-05			0.000247515		3.23e-05	3.31e-05	6.23e-05	1.17e-05		0.000201069	8.08e-05		5.73e-05	0.000408311													0.000275204								0.001277				0.00115979		2.29e-05	0.000105013
Lactiplantibacillus plantarum	0.00127605	0.000541378	8.63e-06	0.000200386	1.98e-05	1.21e-05	0.00029207	0.000534987	0.000347712	0.000157484		0.00011116	2.87e-05	0.000112249	2.64e-05	1.63e-05	0.00046191	0.000423469	2.23e-05	0.000212685	0.000474879	5.47e-05	0.000691075	0.000431682	0.00113746	0.000322226	0.000984203	6.69e-05	0.000148153		0.000109444	0.000234973	0.000461834	0.00061964		0.000191076		0.000259494	0.000147991			0.000820482	0.00183802		0.000457291	0.000567301	0.00048613	8.55e-05	0.000506124
Lactiplantibacillus songbeiensis		3.11e-05	9.54e-06				4.48e-05		2.15e-06				2.73e-06					4.44e-06				5.44e-05																										0.000512878
Lactiplantibacillus xiangfangensis		3.06e-05		1.94e-05			3.13e-05			2.47e-05		6.47e-06					9.27e-05	1.28e-05		0.000153513	4.21e-05																											3.78e-05	7.72e-05
Lactobacillus amylovorus	0.503686	0.95485	1.04589	0.33652	0.451951	0.242227	0.375213	1.35977	3.06296	0.717029	0.864499	0.670335	1.33833	0.85087	1.12155	2.94159	0.386508	0.11351	0.502092	0.685107	1.243	1.03927	0.20557	0.229517	0.355757	0.505045	0.395446	0.239786	0.281165	0.133415	0.286907	0.217234	0.555538	0.511253	0.208389	0.330373	0.379874	0.303487	0.349188	0.497922	0.574442	0.684391	0.709959	0.238706	0.229625	0.40045	0.453271	0.493156	0.29745
Lactobacillus baoqingensis		0.000215328						1.15e-05		5.88e-05		2.14e-05	7.48e-06				3.04e-05	7.17e-06		9.4e-05	1.05e-05																									0.000455356		0.000152635	0.00071628
Lactobacillus crispatus	0.0169119	0.0260604	0.0208904	0.00697121	0.0176494	0.00251935	0.0619466	0.0302111	0.0289891	0.00623524	0.00663092	0.0361752	0.00981664	0.0600373	0.0837738	0.00740091	0.00462712	0.00032523	0.00599947	0.027123	0.0861376	0.00822675	0.00118749		0.0112996	0.0224248					0.001632					0.0538037	0.00317538	0.0532034	0.0504736	0.0443277				0.00163903	0.0338407	0.0475984	0.0120972	0.0189802	0.0109918
Lactobacillus delbrueckii			2.77e-05																	1.01e-05
Lactobacillus equicursoris	0.000255975	3.52e-05	0.000103387	6.89e-05	0.000186861	2.73e-05	2.12e-05	0.000113464	0.000594916	0.000109599	4.04e-05	0.000375055	0.000106997	0.000148164	0.000361597	6.96e-05	7.51e-05	0.000866722	0.00024909	0.000116953	5.2e-05	4.13e-05	0.000105196	0.000185397				0.0001					0.000370519		0.00015663				0.000145232			0.000509369			0.000368624			4.32e-05	5.05e-06
Lactobacillus gallinarum	0.000658458	0.00154224	0.00127834	0.000261638	0.000741024	0.000382221	0.000173672	0.00118234	0.00258944	0.0014025	0.000759423	0.00111425	0.00240933	0.00273208	0.00330749	0.00216271	0.000448726	5.83e-05	0.00206458	0.00436628	0.00552704	0.00212945	0.00113821	0.000135545		0.00202126		0.00019333	0.000978329		0.000431279	7.32e-05		5.17e-05		9.24e-05			0.000192252	0.000252256				0.000969268	0.00315821	0.00386349	0.00207708	0.000845438	0.000477674
Lactobacillus gasseri				1.61e-05	0.000408352					9.18e-05			0.000162978	0.00038705				6.67e-05	0.000150296		0.00272688	0.00115351		0.000294064	0.000311142			0.000106073	1.31e-05																	0.000264794			0.000542162
Lactobacillus gigeriorum	0.000141214	0.000450327	0.00050649	2.45e-05	0.000133356	7.3e-05	4.87e-05	0.000431976	0.000919604	3.44e-05	0.000446433	0.000407178	0.000103847	0.000776953	0.00143952	0.000532972	6.74e-05	2.66e-05	4.06e-05	0.000199917	0.000291771	0.000330982	6.07e-05			0.000372014		0.000122284			0.000296237		0.00052361					0.00103612	0.000256879									0.00020553	4.92e-05
Lactobacillus hamsteri													4.5e-06			3.28e-06
Lactobacillus helveticus	1.32e-05	0.000965189	0.0030807	4.03e-05			0.000162447	0.00947771	0.0426896	0.000350701		0.00124024	3.69e-06	7.89e-05	3.42e-05	0.0412532	0.00646379	0.000443696		0.000463203	0.000444415	0.000272948	3.39e-05	7.29e-05							0.000523216		0.00116066	0.00016688				0.00127417	0.00107162							0.000312926		0.000156019
Lactobacillus hominis									1.17e-05													9.35e-06
Lactobacillus johnsonii	0.150748	0.119858	0.0343672	0.0252427	0.0487753	0.24496	0.0161482	0.0531486	0.0481998	0.0199475	0.00733577	0.0442964	0.0342672	0.0747087	0.0315818		0.00463306	0.0112863	0.0411865	0.0287394	0.160735	0.0998439	0.0436209		0.00111772			0.0469738	0.000928457	0.255939		0.0008012						0.00231789	0.0016032	0.00239262						0.130825		0.0248324	0.0663425
Lactobacillus kalixensis									2.01e-05												1.05e-05
Lactobacillus kitasatonis	2.05e-05	3.62e-05	5.43e-05	1.36e-05	2.42e-05	1.22e-05	2.11e-06	5.25e-05	0.000170515	6.89e-05	3.03e-05	9e-06	0.00578328	0.000159441	0.000143889	0.000140396	2.05e-05	0.00155447	0.00195074	0.000148364	0.00359866	0.000119521	3.65e-05		5.5e-05			5.83e-05			3.28e-05			0.000185019	4.54e-05		0.00012164		1.22e-05			0.00017474					0.000166156	1.12e-05	2.48e-06
Lactobacillus mulieris													1.47e-05								3.95e-06
Lactobacillus nasalidis			1.37e-06						4.93e-06	9.48e-07	8.15e-06	2.63e-06	3.4e-06	2.7e-06	1.18e-05			2.14e-06		1.49e-06	2.22e-06	2.17e-06	3.09e-06			6.57e-05		2.76e-06											1.34e-05	2.8e-05								3.68e-06
Lactobacillus pasteurii	0.00239453	0.000613273	0.00135607	0.000808314	0.00114873		0.000213579	0.0007868	0.00252933	0.00205822	0.000399448	0.000594655	0.00633749	0.00465027	0.00509304	0.000966503	8.89e-05	0.00153513	0.00391717	0.000826336	0.00375309	0.00673045	0.006107	0.00282201				0.000370047			0.000452121								0.000577886							0.000993926	0.00114281	0.000623232	0.000252682
Lactobacillus porci	4.51e-05	2.78e-05	0.000554061	2.09e-05	0.000130774	3.49e-05	0.00022301	0.000416563	0.000221641	0.00026028	0.00135167	0.000180905	0.000249775	0.000303221	0.000588175	0.00240155	8.67e-05	0.000479191	0.00232674	0.00016471	0.000603472	5.06e-05	8.28e-05			9.75e-05		5.74e-05			0.000762405	0.000270571	0.00011121						0.000929532							0.000688577		7.23e-05	3.4e-05
Lactobacillus sp. CBA3605							0.000316305					2.88e-05					0.000123165
Lactobacillus sp. CBA3606		0.000117231		0.000300664
Lactobacillus sp. D1501																	3.46e-05
Lactobacillus taiwanensis																					8.39e-05	0.000111014
Lactobacillus xujianguonis	0.00120649	0.000390562	0.000389226	0.000596485	0.00213329	5.18e-05	0.000542761	0.00240277	0.00976959	0.00136928	0.00189484	0.00185083	0.0161685	0.00213702	0.00280312	0.00197035	0.000538743	0.00128638	0.0081935	0.00148113	0.00805517	0.00529948	0.00111958	0.00111668	0.00020801		0.000239031	0.00101981	0.000460079	6.94e-05	0.000738727	0.000219584	0.00139292	0.00119911		0.000420505	0.000434045	0.000211208	0.00112065	0.000400337	0.000157933	0.000804026		0.000402035	0.000151365	0.000636236	0.000954055	0.00082261	0.0003782
Lactococcus chungangensis						8.6e-05							5.52e-05		6.44e-06		4e-05	2.88e-06
Lactococcus cremoris												0.000183465		6.74e-06			6.12e-06
Lactococcus formosensis		0.000703596					0.000178081		0.00016998	0.000142163							0.000197321				1.94e-05				0.000378231									0.000391918								0.00117606			0.000220027			0.000256312	8.83e-05
Lactococcus fujiensis												4.58e-05					3.75e-05
Lactococcus garvieae	9.3e-05	3.54e-05		4.68e-05		0.000739868									0.000206792		9.08e-05			2.07e-05																													8.46e-05
Lactococcus hircilactis																				5.25e-05
Lactococcus lactis							3.41e-05					0.00111077		0.00178042	7.46e-06		0.00289584				0.000232375
Lactococcus laudensis	1.08e-05						4.91e-06						2.25e-05	5.14e-05	8.09e-06		3.83e-05	3.13e-05																									0.00137584
Lactococcus petauri														5.11e-05	3.97e-05
Lactococcus piscium		4.81e-05		1.27e-06									1.63e-05	9.04e-06			6.53e-05	0.000104958				4.14e-06	3.46e-05																			0.000504418	0.000171712					1.4e-05	6.4e-05
Lactococcus plantarum													6.8e-06
Lactococcus raffinolactis	2.92e-05												0.00408544				0.00628981																									0.00209377
Lactonifactor longoviformis																					3.77e-06
Lamprocystis purpurea					0.00168882														8.24e-05				2.37e-05					0.000578588						0.000102599										5.98e-05
Lampropedia aestuarii							1.73e-05						9.46e-06						5.53e-06
Lampropedia hyalina	2.8e-05
Lapidilactobacillus achengensis	0.000508901	0.000274884	9.93e-06	9.46e-05			0.000320368	2.95e-05	4.23e-06	0.000160119		0.000338631	0.000103196	4.87e-06			0.0021958	0.00111976	0.000111909	0.000220329	0.00040435		8.85e-05																			0.000265319	0.000358142					0.000607396	0.00108202
Lapidilactobacillus bayanensis	4.11e-06	7.92e-05					8.47e-05			0.000217449		0.000147488					0.000179495	2.89e-05	4.81e-06	0.000703654	1.52e-05																					0.000203161						8.45e-06	0.000275925
Lapidilactobacillus concavus	0.000265197	0.00106726	6.96e-05	0.000150682	6.27e-06	5.03e-06	0.000540854	0.000221885	0.000158254	0.0021823	2.64e-05	0.00132508	6.6e-05	2.97e-05	2.02e-05	0.000282421	0.00102798	0.000677707	0.000200119	0.00412812	0.000596699	2.8e-05	0.000184273	0.000151936	7.69e-05						0.000137687					0.00147027	0.001345						0.00101617	0.000529017	0.00113355	0.00042245		0.00049112	0.00374457
Lapidilactobacillus dextrinicus								0.00803474									0.0125287			0.0481614	0.0079857
Lapidilactobacillus gannanensis	0.00105084	0.000566246	4.59e-05	0.000124797			0.000969782	0.000112884	0.000112698	0.000607567		0.000272969	2.15e-05	2.01e-05	1.29e-05	4.27e-06	0.00341154	0.000729525	0.00023158	0.000616437	0.000205014	1.36e-05	0.000700187	0.000397957																		0.00126719				0.000178915		0.000812606	0.00181822
Lapidilactobacillus mulanensis	6.4e-05	0.000134333		6.37e-05		4.9e-06	7.94e-05	5.62e-05	1.54e-05	0.000302047		0.000125954	1.32e-05	7.17e-06	9.96e-06	5.54e-06	0.000197372	0.000140491	2.12e-05	0.000649187	0.000119202		0.000110952																			0.000362132		0.000108964	0.000142453			5.03e-05	0.000483604
Lapidilactobacillus wuchangensis							4.87e-05			3.17e-05		2.38e-05	1.88e-05		6.47e-06		0.000153879			5.67e-05																												2.99e-05	0.0001894
Latilactobacillus curvatus	0.000291388	0.00151618	9.52e-06	0.0217881		2.47e-05	0.00177015	0.00686547	9.29e-05	3.28e-05	2.57e-05	2.24e-05	0.00535278	5.44e-05	0.00110382	6.39e-05	0.0169484	0.0548838		0.00167243	0.00481149		0.000289972	0.0016734	0.000544208		0.00385046	0.000120033						0.0014424			0.000501455		0.000127565				0.00171375		0.000384827	0.00626441		2.77e-05	0.00034829
Latilactobacillus fuchuensis	0.418748	0.00936729						0.129115										0.0122882		0.00914414
Latilactobacillus sakei	0.000516312	0.000307802		0.000538796			0.000141774	0.0011411		4.81e-05		4.12e-05		1.66e-05	1.57e-05		0.000169112	0.00140485		0.000294588	0.0001177				0.000164524									0.00017901				0.000736105	0.000105266	0.000218395			0.00124277		0.000518909				7.42e-05
Lawsonia intracellularis		0.00104917		0.0128979							0.00536518	0.00179058		0.00154668																																		0.00260078	0.000165185
Leclercia adecarboxylata										7.16e-06
Leeuwenhoekiella nanhaiensis		2.08e-05	4.38e-05	1.75e-05		3.89e-05		3.2e-05					2.67e-05	3.18e-05	1.55e-05		1.35e-05				2.5e-05
Lentibacillus sediminis																						1.3e-05
Lentilactobacillus buchneri		1.77e-05		6.84e-05		7.31e-06	3.47e-05			6.36e-05		1.04e-05					7.97e-05	2.16e-05		8.23e-05	8.44e-06				0.000403346																		0.000820232
Lentilactobacillus diolivorans	0.000381964	5.58e-05		2.37e-05				1.63e-05		5.92e-06		3.02e-05	5.24e-06	5.3e-06		3.32e-05			2.65e-05		0.00154177	6.17e-06	0.000367435	0.000302424																						0.00029735			3.3e-05
Lentilactobacillus farraginis	0.000470894	0.000168582		3.8e-06	0.000285442	2.57e-05	3.56e-05	2.84e-06	8.56e-05	0.000167815	2.25e-06	9.32e-05	0.000375863					0.000291194	0.000394672	0.000405161	0.000858735	0.000249524	0.000227066	0.000724923																								7.04e-05
Lentilactobacillus hilgardii		0.000235232		0.000109507			0.00421272			0.00193905							0.00548139			0.000212884	8.28e-05			0.000182811																						0.000456198
Lentilactobacillus kisonensis		2.34e-05
Lentilactobacillus kosonis	6.08e-06	1.26e-05	1.15e-05	1.15e-05	9.16e-06	3.52e-05	0.000172709		2e-05	3.19e-05	7.26e-06			0.000301666	7.71e-05		1.11e-05	3.77e-05		0.000494776	0.000183725	4.65e-06												9.17e-05					0.000119426						0.000581764			1.26e-05	1.66e-05
Lentilactobacillus kribbianus	0.000392362		0.000224598				3.75e-05										6.21e-05	8.2e-05			0.00103668																											0.000130836
Lentilactobacillus otakiensis	4.69e-06	4.82e-06										5.21e-06					4.09e-06				2.93e-06																											1.17e-05	1.69e-05
Lentilactobacillus parabuchneri		0.000343469															0.000252332
Lentilactobacillus parafarraginis	2.61e-05	0.000123435		7.37e-05			0.00239127		5.29e-06	2.89e-05		7.37e-06	2.19e-05	5.5e-05		3.38e-06	0.000181918	1.36e-05	2.97e-05	0.000104359	0.000462275	2.86e-06			0.000262192																	0.00249496							9.59e-06
Lentilactobacillus parakefiri	0.000290843	4.57e-05					1.17e-05	0.000111546		0.000231454		4.88e-05	0.000376749	0.000133254		0.000144376	0.000160144	0.000328017	8.43e-05	0.000282896	0.00195952		0.000402727																										6.4e-06
Lentilactobacillus rapi				2.18e-06													1.41e-06
Lentilactobacillus sunkii		0.000463571															0.000146568			5.02e-06	0.000554738
Leucobacter chromiireducens				8.46e-05			0.00019148													1.19e-05		1.47e-05		0.000321581																								6.09e-05
Leucobacter chromiisoli	7.12e-05
Leucobacter luti	2.12e-05																		9.01e-05			9.69e-05
Leucobacter massiliensis	0.000432886						4.85e-05																																									0.000140525
Leucobacter musarum																						2.12e-06
Leucobacter salsicius	0.000107021	4.78e-06					8.27e-05													3.57e-06		8.86e-06		8.15e-05																								0.000130821
Leucobacter soli	2.12e-05						1.16e-05												3e-05
Leucobacter tardus		1.45e-05
Leucobacter zeae															3.94e-05
Leuconostoc carnosum		0.000403656												0.000844438							0.000694007
Leuconostoc citreum		0.000271319					0.000104246	0.000127554		0.000343959				0.000147023				0.000207194		0.000644215	0.000495617																												7.37e-05
Leuconostoc falkenbergense		1.92e-05													7.72e-06		3.21e-06	2.73e-05
Leuconostoc fallax	4.91e-06	0.000157852		2.58e-05				1.21e-05		3.44e-06		3.05e-05		1.12e-05	1.65e-05		3.6e-06	3.32e-05	3.75e-06	5.48e-05	4.89e-05		4.98e-05		0.000151037											0.000397998												4.78e-06	0.000377703
Leuconostoc gelidum	6.51e-05	0.000160755		4.45e-05			0.000100185	8.87e-05						0.000157317			5.84e-05	0.000301589		0.000216258	0.000314917
Leuconostoc holzapfelii			3.54e-06														4.36e-05
Leuconostoc inhae	5.33e-05						2.91e-05	9.13e-05	9.92e-05	3.3e-05		5.07e-05		9.01e-05			0.000115484	5.62e-05	4.44e-05	7.07e-05	0.000576743																											0.000143865
Leuconostoc kimchii	0.000205293	0.000146291					7.54e-05	8.7e-05		0.000432063		8.95e-05		0.000193092				0.000252157		0.000250357	0.000431086			0.000128237																								5.69e-05	9.87e-05
Leuconostoc lactis	8.89e-05
Leuconostoc mesenteroides		0.000124836								6.35e-05				0.000185217				0.000118251		0.000243143	0.000424999																												0.000415423
Leuconostoc miyukkimchii										0.000300187
Leuconostoc pseudomesenteroides												4.66e-06								0.000180078																													7.44e-06
Leuconostoc rapi		0.0023214								0.00017533							9.16e-05				0.000887818																												0.000290573
Leuconostoc sp. LN180020							5.44e-05	9.34e-05		8.43e-05
Leuconostoc suionicum				0.000164217			5.45e-05			7.26e-05										0.00040726
Levilactobacillus acidifarinae	0.000376773	6.16e-05		1.45e-05	1.75e-05		0.000171809	0.000189948		5.86e-05		7.89e-05		2.85e-05		4.57e-05	4.6e-05		1.45e-05		0.000188502			0.000454755
Levilactobacillus andaensis	0.000155861	0.000504839		7.55e-05		5.28e-06	0.000577899	0.000170943	3.44e-05	0.000408646		0.000113208		7.08e-05	2.88e-05		0.000133808	3.32e-05		0.00018134	0.00152384																											2.95e-05	0.000200523
Levilactobacillus angrenensis	6.89e-06	0.000190438	1.95e-05	5.52e-05	1.11e-05		0.000741947	8.97e-05	2.43e-05	0.000160924		3e-05	1.04e-05	2e-05	1.07e-05	3.33e-05	0.000128293	0.000248811	1.53e-05	6.94e-05	0.00021864	1.34e-05	7.79e-05		0.000331257		0.0006848				3.77e-05			0.000675115		0.000397769							0.00337874		0.000269919	0.000782104		7.15e-06	4.68e-05
Levilactobacillus brevis	0.0018066	0.00170466		0.00185294	1.41e-05	1.49e-05	0.00405338	0.00251619	0.010056	0.00321347		0.000535244		0.000111464	2.92e-05	2.41e-05	0.00174896	0.000236394	7.9e-05	0.00145337	0.000977876	2.56e-05	0.000454369		0.000415322			4.67e-05			0.000254096	0.000136402		0.000340392								0.00312193	0.00404096		0.00130446	0.000637218		4.66e-05	0.00162163
Levilactobacillus cerevisiae		9.03e-05	2.46e-05	0.000106285		1.4e-05	0.000242225	2.83e-05	9.14e-05	0.000290007		2.23e-05			3.65e-05		0.000179726	0.000194647		0.00014011	0.000274475		0.000394757																						0.000468274			6.29e-05	0.000163909
Levilactobacillus enshiensis	9.48e-05	8.23e-05		0.000192522			0.00031652	5.09e-05	1.27e-05	0.000166459		9.27e-05					0.000139671	7.52e-05	9.47e-05	0.000180521	0.000959756																												1.37e-05
Levilactobacillus fujinensis	5.59e-06	7.52e-06					4.42e-05						6.44e-06	5.32e-06	4.87e-06		5.67e-05	2.51e-05		1.99e-05	9.69e-06																												7.24e-06
Levilactobacillus fuyuanensis	0.00159705	0.000366394		0.000177828	0.000297698	0.000214769	0.000190104	4.22e-05	8.8e-05	0.000125776	9.31e-05	8.49e-05	0.000106249	0.000386397	0.000156321	9.46e-05	9.44e-05	0.00013694	3.65e-05	0.000337402	0.000995907	0.000177042	0.00114841	0.000620747										0.000801409		0.000290576										0.00164897		0.000121759	0.000626445
Levilactobacillus hammesii	4.46e-05	0.000153102	2.71e-05	0.000220961		5.79e-06	0.00925269	0.000168042		0.00115737		9.22e-06	4.95e-05	4.81e-06	7.58e-06		0.00105684	2e-05	1.24e-05	0.00167748	0.000814359		3.85e-05	0.00011652	0.000365674							0.000121722		0.000277302												0.000630904		0.000327661	0.000112042
Levilactobacillus huananensis		0.000170488		5.29e-05			0.000153837	6.38e-05		8.6e-05							5.88e-05	0.000104866		0.000197729	0.000412895																											0.00016312	6.39e-05
Levilactobacillus koreensis							0.00665871
Levilactobacillus lanxiensis		0.000731084			1.7e-05	1.63e-05	0.000826618	3.41e-05		0.000225994		2.33e-05					0.000940532			9.15e-05	0.000164434																											0.000166197	0.000602748
Levilactobacillus lindianensis	0.000133362	0.000493384		0.000200406			0.000260574	0.000315842	3.54e-05	0.000120979		1.83e-05	1.56e-05	8.35e-05	1.41e-05	4.08e-06	0.000215235	5.28e-05		0.000235846	0.000499024		0.0010574	0.000518084	0.000295097						0.000109711	0.000421028	0.000351501	0.00139343			0.000544217					0.00190417			0.00095086	0.000509943		0.0002256	0.000337559
Levilactobacillus mulengensis		0.000284405					0.000815346	4.92e-06		7.99e-06						4.51e-06	0.000458325	4.52e-06		6.1e-06	0.000991749																											1.27e-05	0.000581522
Levilactobacillus namurensis	0.000266083	1.86e-05		1.96e-05		5.17e-06	8.32e-05	7.47e-06	1.45e-05	0.00011848		2.37e-05				1.06e-05	3.42e-05	8.9e-05		6.77e-05	0.000242979		7.08e-05	0.000367925																								1.22e-05	3.13e-05
Levilactobacillus parabrevis	0.000122399	0.00160175		0.000184396	7.55e-05	2e-05	0.00103977	0.000322674	0.000112371	0.000752078		0.000267336	5.58e-05		9.02e-06	1.24e-05	0.000329767	3.18e-05	2.3e-05	0.00101552	0.00511186		9.17e-05	0.000271616	0.000463458		0.00129975				0.000465526	0.000787146		0.000984977									0.00584465		0.000471852	0.00136986		0.000358057	0.00106824
Levilactobacillus paucivorans	8.87e-06	7.93e-05	3.05e-05	2.5e-05		4.28e-06	7.44e-05	2.06e-05	1.68e-05	6.81e-05		2.38e-05	3.5e-06	0.000139687	6.45e-05	4.39e-06	7.1e-05	1.25e-05	5.89e-06	5.37e-05	0.000225409	1.18e-05	5e-05		0.00015592	0.000112193								0.00185801											0.000240281			5e-05	0.000107308
Levilactobacillus senmaizukei	5e-06	0.000165959		6.65e-05		3.19e-06	0.000342397	6.85e-05	1.25e-05	6.13e-05	5.16e-06	8.49e-05	2.66e-05	5.86e-06		1.74e-05	6.46e-05	0.000227391		0.000125306	0.000338352										0.000163055											0.000266603	0.0019891					6.01e-05	0.00030995
Levilactobacillus spicheri							0.000176915			4.07e-05								0.000105241		2.81e-05	5.56e-05
Levilactobacillus suantsaii							2.75e-05										0.000128281				2.5e-05													0.00065879								0.00109887
Levilactobacillus suantsaiihabitans		0.000108445				7.8e-06	6.91e-05		3.67e-05	2.71e-05		1.81e-05					0.000114533	1.47e-05	4.28e-06	6.54e-05	2.88e-05	2.02e-05										0.000137764											0.000334225					8.55e-05	6.83e-05
Levilactobacillus tangyuanensis				8.4e-05			0.000109072										5.44e-05			1.1e-05	3.88e-06													0.000400648															5.62e-06
Levilactobacillus tongjiangensis		0.000353658		2.57e-05			0.00021556			6.36e-05		3.91e-05		3.24e-05		4.27e-05	0.000218369	4.91e-05		0.000111486	0.00015227																											6.93e-05	5.96e-05
Levilactobacillus wangkuiensis	9.64e-05	4.55e-05					0.000136863	9.09e-06		4.61e-06							0.000143512	6.24e-06		8.45e-06	0.000378491																					0.000236165						5.65e-05	0.000641093
Levilactobacillus yonginensis	2.63e-05	0.000412907		1.74e-05			0.00053506	0.000121259	1.57e-05	0.000129748		3.88e-05					0.000292449	8.98e-05		0.000315323	0.00031505				0.00108853																							8.23e-05	0.000284612
Levilactobacillus zymae							0.000861121			2.17e-05		1.3e-05					1.33e-05	7.33e-06		1.05e-05	1.47e-05
Ligilactobacillus agilis	0.00668184	7.2e-06	1.5e-05	7.23e-06		0.00272913	0.00355435	0.0306632	3.65e-05	0.00644038	1.31e-05	7.92e-06	1.88e-05	0.00269273	0.00357967		5.47e-06	2.19e-05	3.2e-05	1.41e-05	0.00873263	0.00154571	1.65e-05							8.56e-05	0.0229474	0.00275043		0.00118607					0.000102296	0.00064271				0.000273803			0.000270126	0.00300239
Ligilactobacillus apodemi												3.83e-06						5.29e-06
Ligilactobacillus ceti																					2.5e-06
Ligilactobacillus equi	7.87e-06	4.72e-05	3.33e-05		1.44e-05			3.88e-05	1.47e-06	5.93e-05	4.68e-06	7.36e-06	0.000133752			0.000126113				2.6e-06	0.000330315	9.53e-06						7.13e-06									0.000108458									0.000118154		2.08e-06	1.02e-05
Ligilactobacillus murinus				0.00692451
Ligilactobacillus pobuzihii	9.63e-05	0.000660932		7.06e-05			0.000108781		8.31e-05	0.00026208		3.66e-05		4.39e-06			3e-06	0.000142148	9.09e-06	5.72e-05	0.000432096													0.000405069												0.000192386		0.0001244	0.000293232
Ligilactobacillus ruminis		0.045432	0.0134189	0.000265718		0.0100852						0.000149564				0.0176809																																0.00707627	0.000255721
Ligilactobacillus saerimneri		8.72e-06					6.51e-05							0.000114729	0.000336719				1.98e-05		7.8e-05	5.05e-05
Ligilactobacillus salitolerans		0.000197591						3.4e-06	2.22e-06	3.61e-06								9.49e-06	4.7e-06		9.93e-06																											3.16e-06	3.41e-06
Ligilactobacillus salivarius	0.0455665	0.00416595	1.04e-05	0.00421408	0.0271596	0.00270281	0.0435834	0.0339447	0.00773772	0.0125783		0.00553132	0.00607414	0.00651331	0.00470645	1.53e-05	0.00559508			0.00390068	0.00872491	8.65e-06	0.0194221	0.000918596				0.0104574	0.000179638		0.000165189					0.000346096	0.000493525	0.00566311	0.00042432	0.00034104					0.000720842	0.000574282		0.00920351
Limosilactobacillus agrestis	6.38e-05	4.81e-06						4.36e-06	0.000565025	5.26e-06	4.63e-06	5.44e-06	2.8e-06	9.4e-06	8.19e-07				3.02e-06	4.27e-06	1.37e-05	7.87e-05	1.24e-05
Limosilactobacillus albertensis	8.26e-05	6.86e-05				1.34e-05	7.14e-05	0.000614801	0.000448426		9.91e-05	1.65e-05	7.71e-05	3.41e-05		7.36e-05	3.96e-05	1.36e-05	0.000239489	8.23e-05	2.38e-05	5.67e-05									0.000229468																	1.8e-05
Limosilactobacillus alvi	0.000209043	0.000771097	0.000672319	0.000104323	0.000219127	3.16e-05	0.000463513	0.00158199	0.00107091	0.00155729	0.000197431	0.000121414	0.00141749	0.000707621	0.000536933	0.00120289	0.000120753	7.13e-05	0.000228957	0.000433897	0.00655052	0.0019317	8.28e-05	0.000185905		0.000422485			0.000149373		0.00135092	0.00035841	0.000961064	0.000822552			0.000485165		0.000245974	0.000296972						0.000653987	0.000794679	6.73e-05	0.000144611
Limosilactobacillus antri	0.000413677	5.9e-05	0.000228087		0.000526013		0.000149315	0.000192975	0.000233411	0.000300778			0.000545671	0.00012147	0.00027294	0.000272459	7e-05		0.000157811	0.000223158	0.000588334	0.000298478	0.000840055	0.00102498													0.000390533								0.000480764				8.62e-05
Limosilactobacillus balticus									0.00115054				1.38e-05							2.79e-06																	1.46e-05
Limosilactobacillus coleohominis	3.56e-05	0.000301246	0.00023478	0.000132983	5.06e-05		0.000444452	0.000284321	0.000360817	0.00014892	0.000180946	0.000131139	0.000304182	0.000119254	9.62e-05	0.000292637	4.74e-05			0.000128706	0.000160562	0.000330434																										9.37e-05	4.34e-05
Limosilactobacillus fastidiosus	3.53e-05	6.82e-05	7.8e-05	3.83e-05			2.4e-05		0.000121709	3.77e-05	0.000106681	6.01e-05	0.00016524	2.96e-05	0.000385449	0.000177088	5.12e-06			1.79e-05	0.000220751	8.43e-05																								3.99e-05			6.07e-05
Limosilactobacillus fermentum	0.000413362	0.0047698	0.000112533	6.38e-05	7.08e-05		3.14e-05	0.000168557	0.000157734	5.55e-05	1.02e-05	2.82e-05	0.000218102	7.93e-05	8.91e-05	2.83e-05	8.06e-06	3.14e-05	4.34e-05	7.56e-05	0.00028222	0.000179689	9.94e-05	0.000382902				6.21e-05	0.000235694	5.98e-05																		1.23e-05	0.00132704
Limosilactobacillus gastricus																								0.000181428
Limosilactobacillus ingluviei								0.000204485													4.58e-06
Limosilactobacillus mucosae	0.0335717	0.0170946	0.0326139	0.0117932		0.0134579	0.0086114	0.0266097	0.0433784	0.0226505	0.0500261	0.0198709	0.0220834	0.0416975	0.03203	0.0548077	0.0134912		0.0138496	0.0131013	0.0287981	0.0219731																										0.0438359	0.0127796
Limosilactobacillus oris		0.000629944	0.00109242	9.3e-05			0.000317533	0.000318591	0.000639684	0.000871638				7.43e-05							0.000947535																											8.13e-05
Limosilactobacillus panis	2.49e-05	3.82e-05	3.47e-05	0.000220836	4.56e-05		0.000242115	0.00107224	0.000225919	0.000187611	7.78e-05	0.000136691	0.000796124	7.14e-05	8.51e-05	0.000424997	3.65e-05	1.27e-05	2.02e-05	0.000260727	0.000152059	0.000103445	6.86e-05		0.000248937						4.48e-05		0.000742354									0.000170156					0.000130848	7.18e-05	1.22e-05
Limosilactobacillus pontis								0.186291	0.0969163	0.0947834						0.111703					0.0981833
Limosilactobacillus portuensis	3.43e-05	6.03e-05	0.000261254	0.000209524	1.24e-05		3.79e-05	6.1e-05	0.000116518	4.26e-05	0.000334508		0.000245193	8.34e-05	6.57e-05	0.000128528	4.18e-05	3.39e-06		6.33e-05	0.000334684	0.000331848	6.7e-05	0.00014746							7.5e-05																		6.61e-05
Limosilactobacillus reuteri	0.23933	0.180301	0.108791	0.03406	0.0265408	0.0611819	0.0303385	0.234513	0.26484	0.0810823	0.104744	0.0614108	0.0598169	0.0998776	0.0828148	0.0460963	0.0191078	0.0119978	0.0457931	0.0634552	0.128089	0.15738	0.0590967	0.139363	0.304524	0.145053	0.000944598	0.00897381	0.00125727	0.0676243	0.0472186	0.0520546	0.0792884	0.0783932	0.105507	0.0504346	0.0602409	0.159617	0.0580792	0.145622		0.0017232		0.0737532	0.0603387	0.226648	0.321528	0.0610349	0.0728054
Limosilactobacillus rudii															1.12e-06	7.6e-07						6.35e-07
Limosilactobacillus secaliphilus		7.11e-06					4.45e-06		1.45e-05	2.61e-05	5.66e-06		5.78e-05	1.79e-05	3.9e-05					7.42e-06	2.74e-05	2.33e-05	1.79e-05																		0.000397783
Limosilactobacillus urinaemulieris	5.59e-05	0.000329264	0.000799675	0.000201073		5.7e-06	5.13e-05	5.46e-06	0.000486588	0.000141972	0.000404737	0.000171352	0.000659644	7.4e-05	0.00020503	0.0010049	5.87e-05			0.00014288	0.00062739	0.000317295											0.000190318													0.000249779		0.000140146	0.000184424
Limosilactobacillus vaginalis	0.00833126	0.0084868	0.0116116	0.0108163			0.0193594	0.0769323	0.018663			0.00495814			0.00837394					0.0057358	0.0204623	0.0150392
Liquorilactobacillus capillatus							7.17e-06			5.87e-05		1.57e-05					3.96e-05	0.00081154	1.99e-05	0.000191949			3.46e-05																							0.000185931		3.17e-05	8.15e-05
Liquorilactobacillus mali				5.61e-05	2.74e-05	9.5e-06	1.93e-05	5.58e-05	5.16e-05	0.000198418	5.79e-05		9.92e-05	2.85e-05	4.24e-05	1.1e-05	2.53e-05	0.000158731	3.16e-05	0.000457037	4.47e-05	1.99e-05					4.81e-05																		0.000173003				2.43e-05
Liquorilactobacillus nagelii		7.61e-05
Liquorilactobacillus oeni												5.34e-05		0.000313622	7.78e-05					0.000344592	0.000929164																						0.000267074
Liquorilactobacillus satsumensis			4.37e-05	7.43e-06	1.11e-05					9.69e-05			4.76e-05				4.52e-05			2.36e-05	0.000546681																												2.61e-05
Liquorilactobacillus sucicola							1.09e-05
Liquorilactobacillus uvarum	4.05e-05	7.66e-05		0.000182236			0.000224585	8.03e-05	4.72e-05	0.000138638		0.000100644	9.97e-05	6.22e-05	1.81e-05	2.21e-05	0.000289915	0.00124915	8.24e-05	0.000456689	0.00130601	5.56e-06	0.000119375	0.000172804	0.000150455						3.75e-05			6.91e-05			0.000126462					0.000215996	0.00018827			0.000472266		9.69e-05	0.000293742
Liquorilactobacillus vini		3e-05					1.86e-05			2.79e-06								7.92e-05		3.08e-05																													1.18e-05
Listeria costaricensis	0.000791773								0.000878322		0.000238623	0.000461242
Listeria monocytogenes		2.18e-05				0.00031822	4.48e-05				0.000567754		3.03e-05	4.86e-05	5.82e-05	0.0028568	0.000514368		3.2e-05	0.000634069	5.06e-05	3.44e-05	8.6e-05							0.000279299					0.0010531						0.00176476	0.00104386			0.000983604			8.24e-05
Loigolactobacillus backii	0.00426546	0.00121891		0.000117619			0.000428911		1.71e-05	0.000122331		0.000185003	4.17e-05	0.000136522		7.45e-05	0.000214602	8.22e-05		0.000150701	0.000331232				0.00577311		0.00132415							0.000820909											0.000594524			5.45e-05	0.000663093
Loigolactobacillus bifermentans		0.000231124					0.000727845										0.00029373			0.000377627	0.000910788
Loigolactobacillus binensis		1.02e-05		5.08e-05			2.54e-05	3.19e-05	4.11e-06	2.61e-05		7.26e-06	2.35e-05				1.25e-05	3.42e-05	1.34e-05	0.0001004	0.000403142				0.000149409									1.5e-05								3.45e-05
Loigolactobacillus coryniformis		0.00439692		3.18e-05			0.000256856			0.00521912		3.47e-05					0.00287586	0.000163098		0.000521996	0.000214521																												0.000344474
Loigolactobacillus iwatensis	7.88e-05			1.58e-05								0.000187057		8e-06		1.16e-05	0.00020707	3.32e-05		3.47e-06																												0.000326013	7.49e-05
Loigolactobacillus jiayinensis	2.57e-05	7.15e-05		0.000143825			3.63e-05	5.04e-05	1.32e-06	7.22e-05		6.28e-05			3.15e-06		7.98e-05	9.26e-05	1.55e-05	0.000245505	0.000165637				0.000582287						7.65e-06											0.000344897						4.06e-05	0.000292047
Loigolactobacillus rennini		0.000128785													1.13e-05						1.5e-05	3.27e-06																										1.02e-05	0.000131049
Loigolactobacillus zhaoyuanensis	0.00019553	6.61e-05	4.99e-06	4.67e-05			3.67e-05	2.67e-05	2.15e-05	6.44e-05		7.54e-05	6.56e-06	7.22e-06		2.5e-05	5.51e-05	0.000118615	2.52e-05	0.000164175	9.32e-05		5.15e-05	7.57e-05																			0.000207894		7.02e-05	0.00018523		3.92e-05	0.000110872
Longibaculum muris								0.000114802		1.66e-05		4.28e-05			2.48e-05	5.35e-05	3.57e-05		2.15e-05		7.81e-05
Lujinxingia vulgaris											1.07e-06
Luteimonas marina																			2.74e-06
Luteimonas padinae		1.19e-05
Lutispora thermophila				2.52e-06															6.74e-06	6.49e-06	1.09e-05
Lysinibacillus alkalisoli						1.7e-05	0.000290187			8.44e-05	0.000543179	0.000395129	0.000312302			0.000394448	0.000828674		1.14e-05	9.05e-05		4.53e-05																										2.34e-05
Lysinibacillus boronitolerans			2.43e-06				3.33e-06			1.56e-06		4.87e-06	5.26e-06				7.23e-06			1.7e-06										1.81e-05												5.35e-05						2.57e-06
Lysinibacillus composti						0.000149256	5.31e-05			0.000207069				9.09e-05	2.84e-05	8.78e-06					8.56e-05	3.8e-05												0.000829978													0.000778369
Lysinibacillus fusiformis		1.12e-05					1.76e-05			8.94e-06	0.000105171	3.23e-05	6.52e-05			8.42e-05	4.58e-05			7.67e-06		9.2e-05
Lysinibacillus mangiferihumi												5.51e-05										2.99e-06
Lysinibacillus meyeri																	1.55e-06
Lysinibacillus tabacifolii																						7e-06
Lysinibacillus yapensis									3.46e-06											2.37e-06	5.26e-06																			0.000132852
Lysobacter concretionis		2.93e-05
Macrococcus bohemicus							4.2e-05			1.63e-05	0.000545785	4e-05	0.000107002	5.57e-05	1.42e-05	0.000100532	0.000253267		0.00010122	4.38e-05	7.3e-05	0.000223128													0.00193229		0.00161154	0.000646118				0.00150684		0.000574561			0.000479532	1.99e-05	1.57e-05
Macrococcus caseolyticus	5.97e-05					3.26e-05				0.000132363				4.13e-05				9.18e-05				1.91e-05
Macrococcus goetzii						1.44e-05
Macrococcus sp. IME1552						0.00833178
Macrococcus sp. JEK37	6.85e-06	1.03e-05		3.92e-05		1.48e-05		3.99e-06			5.59e-06	2.82e-06	5.33e-06	0.000133768	6.85e-05	5.04e-06	3.67e-06	4.32e-05	7.63e-06	0.00020932	0.00018189	3.5e-05																		0.000207864			0.000311228		8.66e-05	0.000104402
Mailhella massiliensis			2.22e-05			4.96e-06				1.25e-05	3.23e-05	1.53e-05				3.01e-05	4.2e-06		2.01e-05
Mammaliicoccus sciuri	0.000180035						7.75e-06					3.53e-06	5.16e-05		7.86e-06		0.000520523		2.94e-05	1.76e-05		4.89e-05	0.0021593												0.000909097						0.000551541			0.00394328	0.000234812
Mammaliicoccus vitulinus																																			0.000341507												0.000449233
Mangrovibacterium marinum		2.99e-05				3.01e-05													1.57e-05			4.14e-05																										9e-05
Mangrovihabitans endophyticus															2.82e-06
Maribrevibacterium harenarium						0.000832728		2.89e-05											6.42e-05			5.71e-05								0.000619606
Marinilabilia salmonicolor																				1.07e-05
Marinilactibacillus piezotolerans	1.57e-05	3.74e-05				0.000135866					6.03e-05	1.27e-05	6.05e-06	1.5e-05		4.12e-05			9.62e-06	5.15e-05	8.37e-06	2.22e-05	4.45e-05
Marinilactibacillus psychrotolerans											6.06e-06					1.74e-05						7.83e-06
Marinisubtilis pacificus															4.2e-06
Marinobacter halodurans							9.64e-07					8.24e-06	6.06e-06						1.31e-06	2.71e-06		1.33e-06
Marispirochaeta aestuarii		6.8e-06													4.28e-06
Marivirga atlantica							1.84e-05										0.000139883	4.8e-05
Marmoricola endophyticus				3.33e-05																																										4.29e-05
Marseilla massiliensis			1.9e-05		1.03e-05		2.55e-06	5.51e-06							1.55e-06		1.01e-05		2.58e-05		4.58e-06	1.94e-05																											5.3e-06
Marvinbryantia formatexigens	0.00026141	0.00013024		0.00063455			0.00019156	0.000429329	7.19e-05	0.000205033			0.000222953	0.00143149	0.000521376			8.95e-05		0.000183884	8.2e-05
Massilia guangdongensis																	2.3e-06
Massilibacterium senegalense																						7.67e-06
Massiliimalia massiliensis		6.87e-05		0.000108443					2.02e-05												4.83e-05	2.38e-05
Massiliimalia timonensis		1.49e-05	0.000128072	1.72e-05	0.000241369	7.64e-05		5.47e-05	0.000174107	0.00019895	0.000193955	6.15e-05	6.32e-05	6.09e-05	0.000170864	0.00012855			3.72e-05	5.1e-05								6.04e-05																					5.17e-05
Mediterranea massiliensis	8.37e-05	0.000124669	8.83e-05	3.66e-05	0.000314546	5.89e-05	3.83e-05	9.24e-05	0.000116769	0.000201327	0.00020069	8.25e-05	5.94e-05	8.31e-05	0.000135331	8.46e-05	0.000118306	3.64e-05	9.1e-05	2.6e-05	0.000272284	4.94e-05						0.0001895			5.74e-05								6.25e-05							0.00020263		2.65e-05	0.000422904
Mediterraneibacter butyricigenes	0.000129799			0.00619725		1.47e-05			0.0123307				7.36e-06					7e-06
Mediterraneibacter catenae	0.0047912	0.00112835	0.00328488	0.00313173	0.0109068	0.00191011	0.00185723	0.0037142	0.00349159	0.00530459	0.00115867	0.00190854	0.00148727	0.0108436	0.00222728	0.00296403	0.000946294	0.00214827	0.00187156	0.00356117	0.00282459	0.00299591	0.00197195	0.00233724			0.00320901	0.00204698	0.00133419	0.000340545	0.000775652	0.00154281	0.00113752						0.00102023	0.00103916					0.000349247	0.0016623	0.000490406	0.000548997	0.00135451
Mediterraneibacter faecis	0.00385495	0.00336308	0.00297939	0.0123952	0.0076814	0.00120199	0.00809303	0.0353088	0.0106073	0.00620517	0.00274261	0.00514263	0.000949817	0.019064	0.016886	0.00481124	0.00626719	0.0033264	0.00145283	0.00551168	0.00327764	0.00159063	0.000461742	5.19e-05		0.000188636		0.00154579	0.000102999	7.61e-05	0.00975517	0.00726222	0.00103808			0.00125761	0.000222166	0.00329435	0.0016499	0.000382029	0.000193205	0.00760607	0.00162002	0.000120475	7.69e-05	0.00106774		0.00478302	0.00105484
Mediterraneibacter glycyrrhizinilyticus	4.51e-05	5.69e-05	0.000244933	0.000475746	0.00106706	4e-05	0.000162737	0.000621888	9.84e-05	0.000116469	0.000124033	5.86e-05	0.000101521	0.000263338	0.000192363	0.000121819	0.00017812	0.000365362	4.8e-05	4.15e-05	0.000106108	1.2e-05						0.000323567			8.08e-05																		7.83e-05
Mediterraneibacter massiliensis									2.62e-06			2.17e-06				1.71e-06
Megasphaera elsdenii		0.0116582				0.0769239			0.0196748	0.106666	0.0928394	0.0326857		0.0159211		0.0371895	0.0228726	0.0126343		0.0403014	0.0289527	0.0451872																										0.0152036
Megasphaera hexanoica		2.83e-05	5.49e-05		5.98e-05	9.25e-06		1.64e-05	3.23e-05	0.000241418	9.67e-05	5.66e-06	3.93e-05	2.3e-05		1.43e-05	1.33e-05		1.6e-05		2.67e-05	6.9e-05																										1.02e-05
Megasphaera hominis				4.54e-06																9.8e-06
Megasphaera hutchinsoni		6.53e-06		1.19e-05		1.29e-05			1.77e-05	8.84e-06				4.96e-06		5.35e-06						3.56e-06
Megasphaera paucivorans																						2.32e-06
Melaminivora alkalimesophila																						0.000159297
Melghirimyces thermohalophilus			4.3e-06																		2.66e-06
Merdibacter massiliensis			7.76e-05								0.000130541				0.00050708					3.66e-05
Merdimonas faecis	0.00158261	0.000764451	0.000640112	0.000705883	0.00251144	0.000522189	0.00139414	0.00144979	0.00169634	0.0013614	0.000817367	0.000855235	0.000425778	0.000971738	0.000858753	0.00054041	0.000703548	0.000938213	0.000812049	0.000494144	0.000485224	0.000573055		0.000185049	0.000441483			4.42e-05		3.99e-05	0.00015858	0.00014648	0.000662605	0.000299976	0.000208803				0.000194256	0.000143707					0.000182354		0.000326815	2.1e-05	0.00118326
Mesorhizobium waimense																																								3.39e-05
Metakosakonia massiliensis												7.54e-07										1.65e-06
Metalysinibacillus jejuensis	0.000153894	6.72e-05	0.00012757	6.53e-06	3.83e-06	0.000403107	0.00033273	7.55e-06	9.91e-06	4.4e-05	0.000476074	0.000443618	0.000397457	3.96e-05	2.21e-05	0.000407466	0.000921985	5.19e-05	6e-05	0.000113465	8.78e-05	0.00050464	0.000449423		0.00037951					0.000213075				0.000198793	0.000618711	0.000477819	0.00109462	0.0022073			0.000230817	0.00246621	0.00226629	0.000432907	0.000760924	0.00209197	0.000947074	0.000406466	1.7e-05
Metaprevotella massiliensis	0.000104499	5.14e-05	5.12e-05	3.09e-05	0.000418778	4.81e-05	1.24e-05	0.000266008	0.000321664	0.000108059	0.000122017	0.000119051	0.000112518	5.33e-05	7.49e-05	5.15e-05	0.000153697	2.22e-05	4.14e-05	7.2e-05	8.01e-05	2.72e-05						0.000102338		7.36e-05	6.86e-05																		0.000192099
Metasolibacillus fluoroglycofenilyticus						1.72e-06							1.87e-06
Methylobacterium bullatum									1.98e-06
Methylobacterium variabile		1.32e-06
Microbacterium ginsengisoli	4.26e-06
Microbacterium gubbeenense	1.14e-05					4.57e-06												8.11e-06																														6.32e-06
Microbacterium liquefaciens	3.15e-05					4.03e-06	2.8e-06									4.72e-06
Microbacterium mitrae	4.28e-05	1.3e-05
Microbacterium oxydans						1.9e-05	9.18e-06
Microbacterium paulum	1.03e-05
Microbacterium profundi							8.33e-06
Microbacterium schleiferi																				0.000101447
Microbacterium sorbitolivorans	3.09e-05						3.8e-06			7.65e-06			1.9e-05	3.87e-05	5.54e-05	6.36e-06			6.16e-05	3.4e-05		0.000128462	5.74e-05																									9.64e-06
Micrococcus lylae																														0.000241236
Micrococcus terreus																						2.73e-05
Microlunatus flavus	1.56e-05
Microvirga antarctica																					1.09e-06
Microvirga pakistanensis																																												3.57e-05
Miniimonas arenae																						6.06e-06
Miniimonas sp. S16		4.71e-05																				6.47e-05
Miniphocaeibacter massiliensis	0.00106898	0.000175862	3.18e-05	0.00025475		0.000179032	0.000452408			1.32e-05	0.000338581	0.00089825	8.35e-05	3.21e-05	2.03e-05	0.000569316	1.78e-05		9.68e-05	0.000232529	3.31e-05	0.000217881	0.000793683	0.00123386																								0.000218157	3.1e-05
Mitsuokella jalaludinii	8.08e-06	0.000311375	1.18e-06			0.000951236		0.000108708	0.000274575	0.00137542	0.000870552	0.000484243	0.000121726	0.000429566	3.17e-05	0.000126017	0.000403009		0.000208635	0.000205152	0.000363513	4.07e-05																										0.000153966	0.000510307
Mitsuokella multacida							8.57e-05			0.00512813	0.0130274	0.000160686
Mobilibacterium timonense																						0.00117343
Mobilicoccus massiliensis												7.3e-06
Mobilicoccus pelagius																				3.24e-06
Mobilisporobacter senegalensis		3.06e-06	5.6e-06		2.41e-06			6e-06		2.78e-06		2.68e-06	1.47e-05			5.77e-06						3.08e-06
Mobilitalea sibirica	2.02e-06								2.29e-06					1.76e-06								2.21e-06
Moellerella wisconsensis																			1.9e-05																													0.000374052
Mogibacterium kristiansenii	0.0025873	0.004735	0.00144847	0.00545625	0.00114858	0.00169766	0.0015463	0.00225029	0.00208848	0.000789332	0.000585631	0.000780576	0.00221862	0.00911408	0.00561146	0.00175939	0.000548587	0.00124314	0.00105233	0.00298475	0.00647143	0.00588085	0.00281076	0.00165401	0.000559033	0.000584623		8.59e-05		0.00016133	0.00172528	0.000193014	0.000560837				0.00142624		0.000153606					0.000126302	0.00135736	0.000415504	0.000263773	0.000468888	0.000877457
Moraxella osloensis		2.19e-05				0.0155188					0.000122574					3.77e-05						0.000152633
Moraxella pluranimalium	0.000286822	7.13e-06		2.88e-06		0.00011109	9.96e-06	1.61e-05			0.000277634	0.000133869	6.97e-06	7e-06	9.5e-06	0.000493497	6.51e-05		0.000244696				0.000391863							7.48e-05					0.00488511						0.0052734				0.000180599			3.67e-05	6.63e-05
Moraxella porci																						2.5e-06
Mordavella massiliensis	9.77e-05	1.01e-05	2.02e-05	1.46e-05	5.7e-05		6.84e-06	1.01e-05	9.42e-06	2.36e-05	2.68e-05	2.64e-06	0.000137945	0.001233	9.22e-05	1.68e-05	8.33e-06	5.77e-05	3.3e-05	1.4e-05	3.23e-05	1.09e-05	0.000118015																				0.000276273
Morganella morganii		4.7e-05				0.0191573				1.4e-05	0.00486873	0.000100804	0.0020158			0.000295625	0.000934807		0.0003669	0.000135089		0.000319222															0.00887251					0.00727382		0.000880002	0.000446264		0.00070983	8.18e-05
Morganella psychrotolerans	1.12e-05						6.29e-06				0.00238657
Mucilaginibacter gossypiicola																					1.18e-05
Mucispirillum schaedleri		1.04e-05		1.11e-05	1.4e-05	1.11e-05	1.43e-05			6.08e-06	0.000142656		1.41e-05	1.69e-05	1.74e-05		2.75e-05		8.07e-06		3.29e-05																												9.26e-05
Muricauda oceanensis	2.86e-05																																															2.85e-05
Muricomes intestini	4.44e-05	3.54e-06	9.97e-06				1.52e-06			3.89e-06			1.17e-05	1.01e-05	6.97e-06		2.41e-05		0.000143654
Murimonas intestini		9.21e-06	9.94e-06	4.4e-06	6.18e-06	9.83e-06	3.64e-06	8.21e-06	1.12e-06	4.9e-06	5.45e-06	4.5e-06	1.78e-05	1.02e-05	1.38e-05	1.1e-05	3.05e-06	6.84e-06	6.1e-06	6.65e-06	9.39e-07	1.08e-05													9.86e-05														9.09e-06
Mycetocola lacteus	8.13e-05	3.19e-05					1.66e-05
Mycobacterium angelicum															1.43e-06
Mycobacterium europaeum													0.00103131				0.000240449
Mycoplasma molare			2.17e-05									1.04e-05				1.31e-05
Mycoplasma zalophi
Mycoplasma zalophidermidis				1.08e-06
Myroides albus	2.24e-05						1.03e-06					2.37e-05	1.61e-05				1.7e-05
Myroides guanonis																			4.43e-06																													2.03e-05	3.92e-06
Myroides indicus		6.09e-06										1.16e-05	1.19e-05																																			2.01e-05
Myroides injenensis		4.05e-06				4.88e-06						3.3e-06	4.93e-06				3.16e-06		2.22e-05	1.69e-06																												0.000236622
Myroides marinus						6.29e-06							1.34e-05				9.42e-06		1.64e-05																													3.38e-05
Myroides odoratus																			0.0172075
Myroides pelagicus						1.46e-05					4.22e-06								3e-05																													3.16e-05	1.22e-05
Myroides phaeus	4.59e-05	2.74e-05		2.25e-05		8.53e-05	5.56e-05				9.33e-05	0.00229581	2.17e-05		1.95e-05		0.00424713		9.16e-05																													0.0208197
Myroides xuanwuensis						3.77e-05											1.2e-05					9.22e-06
Myxococcus llanfairpwllgwyngyllgogerychwyrndrobwllllantysiliogogogochensis	1.18e-05	7.06e-06	1.64e-05	4.85e-06	6.12e-06	2.47e-06		2.2e-06	7.64e-06	1.4e-05	2.64e-06	1.48e-06	1.69e-06	2.56e-06	6.81e-06		3.16e-06	2.22e-06	3.21e-06	6.92e-07	1.45e-06		9.4e-06	3.65e-05																				1.59e-05			3.08e-05		4.29e-06
Nakamurella silvestris				9.63e-06		2.79e-05									2.66e-05		1.76e-05			1.12e-05		3.91e-05
Natranaerovirga pectinivora								6.02e-06			4.01e-06										3.29e-06	5.15e-06
Natronincola ferrireducens											2.74e-06
Natronogracilivirgula saccharolytica	8.74e-07		1.29e-06	7.31e-07	1.3e-06	7.95e-07		1.24e-06		1.5e-06	8.24e-07	8.27e-07		7.35e-07				1.67e-06	1.43e-06			7.39e-07						7.14e-06		8.84e-06				2.2e-05					1.06e-05										1.38e-06
Negativibacillus massiliensis	7.76e-05	0.00090239	0.000932747	7.97e-05	0.0026836	8.4e-05	0.00120729	0.0169381	0.00129844	0.000228411	0.000146115	0.0018661	0.00011787	0.00623136	0.00388115	4.82e-05	0.000102773	3.52e-05	0.0001049	0.000547299	0.00180915	0.00152396						0.000259261					0.000362292	0.000566848					0.000193809					0.0003808					3.55e-05
Neglectibacter timonensis	2.66e-05
Neisseria arctica						1.1e-05						1.67e-05
Neisseria dumasiana												1.21e-05																																				4.46e-05
Neobacillus bataviensis		5.98e-06	8.02e-06			1.44e-05			1.96e-06			2.63e-06			2.26e-06	1.39e-05				5.55e-06						3.41e-05
Neobacillus notoginsengisoli								9.26e-05
Neobittarella massiliensis	2.97e-05	0.000288803		3.35e-05	3.74e-05	2.82e-05	5.86e-05	1.18e-05	0.000433599	1.19e-05	3.13e-05	9.55e-05	8.56e-05				2.69e-05		2.46e-05	2.97e-05	0.000150731	0.000150094																											0.000203316
Neofamilia massiliensis				4.78e-06									1.14e-05
Nesterenkonia haasae																																										6.4e-05
Nesterenkonia natronophila	0.000126494	3.91e-05	0.000117762	7.73e-05	0.000148774	1.75e-05	1.06e-05	1.98e-05	2.52e-05	0.000100594	2.14e-05	1.49e-05	2.42e-05	3.09e-05	2.32e-05	4e-06	1.4e-05	6.16e-06	9.64e-06	1.13e-05	1.11e-05	5.58e-06	5.61e-05	5.41e-05				1.59e-05																				1.85e-06
Nesterenkonia salmonea																		3.7e-06				2.76e-06
Niameybacter massiliensis		2.83e-06		6.11e-06																	4.23e-06
Nocardia camponoti																		2.63e-06
Nocardioides allogilvus							1.16e-05																1.08e-05
Nocardioides malaquae																							3.84e-06																			4.02e-05
Nocardioides terrigena																								7.69e-05
Nocardiopsis listeri			4.04e-05
Nonomuraea glycinis	1.96e-05	7.06e-05	2.46e-05	2.68e-05	0.000133917	1.23e-05	3.26e-05	1.11e-05		2.91e-05		1.33e-05	1.14e-05	1.09e-05			2.4e-05	0.000193608	0.000111849	3.46e-06	1.23e-05	4.9e-05	4.65e-05					5.72e-05															0.000348637					1.59e-05	3.16e-05
Nosocomiicoccus massiliensis	1.31e-05		5.51e-06			5.22e-06		4.73e-05	0.000175983			6.35e-05				1.08e-05			0.002344			4.54e-05																						0.000298291					8.92e-06
Novosphingobium aureum		7.93e-07		8.63e-07							9.16e-07			1.25e-06					1.16e-06		9.58e-07																												3.18e-06
Oceanibaculum pacificum								0.000637197				0.000787038					0.000104203
Oceanobacillus salinisoli																							3.5e-06
Oceanospirillum linum				1.15e-06														1.91e-06		1.26e-06	1.51e-06								2.51e-05														0.0001
Ochrovirga pacifica	2.66e-06			2.19e-06
Oligella ureolytica	0.0277082			0.000331181		0.000395414	0.000169399					0.000348623	0.000697006			0.000537351	0.00225434	5.5e-05	0.00401361	0.000184967		3.08e-05								4.53e-05						0.00274327											0.00577002	2.13e-05
Oliverpabstia intestinalis	0.00150256	0.00227161	0.00323317	0.00532684	0.00546882	0.00118357	0.00171566	0.0133964	0.00658339	0.00520693	0.00160187	0.00439328	0.00208138	0.0090393	0.0139957	0.00428762	0.00222292	0.000605764	0.00217867	0.00550395	0.00385387	0.00212633	0.000389995	0.000628745	0.000416426	0.000881771	0.0013922	0.00436977	0.00969704	0.000313858	0.00290745	0.00310289	0.00308516	0.00175182	0.000329765	0.00108824	0.000670358	0.00214166	0.0024497	0.00469576	0.000813419	0.00245649	0.00234729	0.00031933	0.000953734	0.000734464	0.000785595	0.000891507	0.000727301
Olsenella porci		2.55e-05	3.87e-05				2.16e-05				2.75e-05			0.000216579	6.39e-06	4.01e-05		1.27e-05		1.7e-05		3.47e-05																0.000718547
Olsenella profusa	1.28e-06				1.59e-06				2.18e-06			1.58e-06					1.18e-06											4.32e-06
Olsenella sp. GAM18	0.0388225	0.0894873	0.051285	0.0706337	0.00818379	0.0557633	0.0512441	0.0450004	0.180042	0.0447118	0.0607377	0.0993598	0.059415	0.108172	0.0815861	0.0913066	0.0147907		0.0663261	0.133358	0.0476634	0.0689164																										0.0396729	0.0180353
Olsenella urininfantis						6.32e-06								1.88e-05		7.72e-06		1.04e-05
Oribacterium asaccharolyticum			1.83e-05		2.61e-05	2.29e-05			2.83e-05	0.000123126	8.71e-05	5.09e-05		1.11e-05		0.00014119	1.31e-05		3.41e-05			5.74e-05
Oribacterium sinus											6.45e-06	4e-06								3.59e-06																													7.13e-06
Ornithinicoccus halotolerans												1.13e-06
Ornithinimicrobium murale																						4.75e-06
Ornithinimicrobium tianjinense						1.75e-05
Oscillibacter ruminantium	2.58e-05	7.81e-05	0.00016095	4.97e-05	0.000237894	0.000105877	1.23e-05	4.5e-05	4.93e-05	0.000117368	9.36e-05	0.000105256	2.95e-05	6.59e-05	0.000104986	0.000149136			2.52e-05		0.000246339	4.26e-05						0.000101628																					0.00032094
Oscillospiraceae bacterium					0.0185688
Oxobacter pfennigii									8.4e-06	6.39e-06	1.06e-05		6.84e-06
Paenalcaligenes hominis						2.52e-05	5.36e-06					1.22e-05	7.85e-06	1.45e-05					1.73e-05			2.85e-05																										1.07e-05
Paenalcaligenes suwonensis																			7.01e-05
Paenibacillus agri																							3.67e-06							8.01e-06																2.32e-05
Paenibacillus alba					1.76e-06
Paenibacillus azotifigens	2.85e-06	2.62e-06	2.37e-06	2.28e-06	2.29e-06	6.3e-07	9.19e-07	2.3e-06		1.47e-06	5.49e-07	1.47e-06	1.6e-06	8.26e-07	2.83e-06			1.28e-06				1.54e-06	1.95e-05					5.89e-06			7.97e-06						3.26e-05												1.67e-06
Paenibacillus castaneae															5.04e-06
Paenibacillus cineris														7.05e-07
Paenibacillus contaminans						4.58e-06							7.23e-06
Paenibacillus segetis			1.67e-06																		1.73e-06
Paenibacillus tepidiphilus																																								8.39e-05
Paenibacillus turpanensis													1.41e-06
Paenibacillus xylanilyticus																							1.82e-05
Paeniglutamicibacter antarcticus	2.93e-05	1.15e-05									1.36e-05					1.99e-05			5.3e-05	1.04e-05		9.91e-05																										3.49e-05
Paenirhodobacter enshiensis																			3.56e-06																												1.73e-05
Paenochrobactrum gallinarii		4.57e-06					0.000116574												0.000224021	1.22e-05		8.19e-06																										0.000148197
Paludifilum halophilum													1.41e-06			4.26e-06
Pantoea brenneri														6.88e-06																								0.0005563	0.00022628
Pantoea conspicua														0.000553147	0.000328607
Pantoea pleuroti												1.66e-06
Parabacteroides acidifaciens			2.16e-06							2.73e-06
Parabacteroides chinchillae	1.52e-05								1.15e-05				7.03e-05				5.61e-05
Parabacteroides distasonis														2.86e-05
Parabacteroides faecis														3.06e-05					5.64e-06
Parabacteroides provencensis													1.49e-05
Parabacteroides timonensis												2.47e-06
Paracandidimonas soli		7.74e-06
Paracholeplasma morum							2.3e-05						2.92e-05
Paraclostridium benzoelyticum									9.67e-07
Paracnuella aquatica																							1.39e-05
Paracoccus aeridis	4.76e-05	1.29e-05				1.68e-05	1.68e-05					1.33e-05				2.55e-05		6.84e-06	1.46e-05	4.93e-06	6.35e-06	4.81e-05								7.82e-05
Paracoccus alcaliphilus		1.03e-05				2.37e-05	1.69e-05
Paracoccus alkenifer	2.15e-05	0.000797898
Paracoccus chinensis		5.48e-06
Paracoccus denitrificans							8.16e-06
Paracoccus endophyticus						4.43e-06
Paracoccus halophilus						5.08e-06												1.02e-05
Paracoccus limosus	1.15e-05
Paracoccus lutimaris	3.15e-06						9.71e-06
Paracoccus marinus							1.04e-05
Paracoccus salipaludis						3.24e-06
Paracoccus sediminilitoris							1.11e-05
Paracoccus sediminis							2.3e-06
Paracoccus solventivorans		8.55e-06																					7.88e-05
Paracoccus xiamenensis																																												9.82e-05
Paradesulfitobacterium ferrireducens		9.73e-06						6.12e-06				4.35e-06	1.61e-05	4.29e-06		1.05e-05	8.64e-06		1.75e-05	7.92e-06	9.35e-06	1.34e-05
Paraeggerthella hongkongensis	1.66e-05	7.65e-06	6.5e-05	1.76e-05		7.78e-06	1.47e-05	2.29e-05	1.46e-05				5.34e-06	1.26e-05	1.36e-05	2.29e-05	6.62e-06		2.94e-05	1.08e-05		4.84e-05	5.08e-05																									1.28e-05
Parafannyhessea umbonata							0.0657087							0.0205322				0.0104379		0.0136869
Paramuribaculum intestinale	4.42e-05	1.01e-05	1.62e-05	1.89e-05	2.18e-05	1.07e-05	1.06e-05	1.66e-05	2.05e-05	1.48e-05	4.95e-06	1.24e-05	1.15e-05	1.59e-05	4.83e-05	1.59e-05	1.67e-05	2.8e-05	7.37e-06		2.71e-05	6.95e-06	5.54e-05													0.000127461			0.00011434										2.29e-05
Paraprevotella clara	2.19e-05	3.09e-05	8.68e-05	1.24e-05	4.5e-05	2.24e-05	4.84e-06	4.66e-05	1.78e-05	3.45e-05	2.07e-05	2.37e-05	1.87e-05	2.93e-05	0.000109828	4.01e-05	3.6e-05	2.89e-06	2.29e-05	1.19e-05	6.21e-05	1.57e-05	6.1e-05					5.7e-05	2.35e-05										2.1e-05										4.17e-05
Parasporobacterium paucivorans		7.16e-06										4.15e-06			2.1e-06
Parasutterella excrementihominis	5.95e-06	0.000152951					5.39e-06			6.04e-06		4.29e-06					2.96e-06	7.61e-06					4.38e-05																										2.4e-05
Parasutterella secunda																	4.29e-06
Parenemella sanctibonifatiensis		5.05e-06														2.99e-06						4.59e-06
Parolsenella catena		0.00855294										0.00506077				0.00876737			0.014852			0.00636082																										0.0275569
Parvibacter caecicola	2.8e-05	6.28e-05	4.94e-05	2.38e-05		1.39e-05		5.73e-05				2.83e-05	0.000111368	4.42e-05	2.33e-05	1.1e-05				2.42e-05	4.96e-05	2.97e-05	9.03e-05							0.00013529
Pasteurella langaaensis		9.42e-06
Paucidesulfovibrio gracilis		5.84e-06		8.08e-05			2.05e-05											9.64e-06		7.96e-06	2.8e-05				0.000176035		0.000267286																0.000959748		0.00011484	0.000205998		1.93e-05	8.8e-06
Paucilactobacillus hokkaidonensis	0.00174749	0.00338944	0.000367834				0.00062641	0.000161647		0.0010861		0.000536898				0.000359542	0.000886803	0.000679518		0.00118125	0.00149565																											0.000989932	0.0013041
Paucilactobacillus kaifaensis		0.000202801		3.13e-06			0.000264189			7.06e-05		0.000122022		4.8e-05			0.000328632	0.000110658		0.000163561																							0.0043529					0.00012608	0.00022613
Paucilactobacillus nenjiangensis	0.030748	0.0256007	0.00882827	6.55e-05			0.00309362	0.00925825	2.6e-05	0.0114496		0.00835039	0.00146723	2.58e-05		0.00332821	0.00938777	0.00271087	0.00095865	0.0039901	0.0159605	1.05e-05	0.00758856	0.000748276	0.0014622						4.96e-05	5.67e-05		0.000768381								0.000674392	0.000263701		0.000598035	0.00097835		0.0173095	0.0133791
Paucilactobacillus oligofermentans	0.00092689	0.00118972		0.000172407			0.000461306					0.000266372				0.0184194	0.000371721	0.00104742		0.00091454	0.00121894																												0.000342165
Paucilactobacillus suebicus		3.49e-05					1.51e-05			0.000180226							3.81e-05	9.66e-05																0.000572403
Paucilactobacillus vaccinostercus	0.000238176	0.00020038		1.52e-05			0.000184438	2.92e-06	2.24e-06	0.0010108		7.95e-06	6.66e-06	2.21e-05			0.0001747	7.8e-05		5.36e-05	5.71e-05			0.000245481										3.08e-05															6.73e-05
Paucilactobacillus wasatchensis	8.05e-05	8.83e-05		3.65e-05			8.32e-05	4.92e-06		7.27e-05		9.88e-06	2.88e-06				2.91e-05	1.94e-05	1.7e-05	8.25e-05	0.000320542																												4.16e-05
Pediococcus acidilactici	0.000114318	1.06e-05					0.000161867	0.000130161		0.000794588		1.07e-05		0.000256578	2.6e-05		8.52e-05	5.92e-05		0.000820579	0.0012309
Pediococcus argentinicus		3.03e-05																																														3.34e-05	4.84e-05
Pediococcus claussenii	0.00659231	0.00029566		3.35e-05			0.000394933	5.68e-05		0.000274309		3.86e-06		3.94e-06			0.000368663	0.000182201		0.000584617	0.000281439													0.00129411									0.000555918					0.000606131	0.000312649
Pediococcus damnosus		0.000234841					0.000402919			0.000383218							0.000448674			0.000125698	0.000115991																											0.000302717	6.72e-05
Pediococcus ethanolidurans		2.5e-05		4.64e-05			0.000241988			9.86e-05		2.17e-05					1.77e-05			0.000241342	5.84e-06																								0.00042304				7.39e-05
Pediococcus inopinatus		0.0009056		6.28e-05			0.00072652			0.000129621		0.000375328						0.00226424		0.00234585	0.00152426																												0.000405355
Pediococcus parvulus	1.41e-05	7.64e-05	2.7e-05	0.000217771	1.7e-05	0.000111147	0.000142551	0.000122092	1.37e-05	5.85e-05	2.6e-06	2.78e-05	2.7e-05	3.68e-05	5.8e-06	3.16e-05	4.22e-05	0.000203842	1.65e-05	7.39e-05	0.00016015	8.4e-05	2.04e-05								2.65e-05												0.000436333			0.000168952		8.79e-05	9.12e-05
Pediococcus pentosaceus		0.000672301		0.000115182						0.00770195		4.34e-05					0.00700418	0.000182341		0.000116172
Pedobacter changchengzhani		1.27e-05			5.2e-05								6.69e-06
Pedobacter frigidisoli																	1.89e-05
Pedobacter miscanthi															1.29e-05			1.64e-05			6.03e-05	4.85e-05
Pelagibacterium lentulum							2.03e-05																																									4.21e-05
Pelistega europaea															1.9e-05
Pelistega suis		3.38e-06				0.000783674				1.57e-05		5.44e-06						1e-05	0.000187234	9.28e-06	3.42e-06																											3.72e-06	2.27e-05
Pelobium manganitolerans																					6.94e-06
Peptococcus niger		1.37e-05		3.01e-06	3.25e-06		2.26e-06		6.97e-06	3.25e-06		4.59e-06	9.17e-06	1.62e-05	1.81e-05	2.85e-05	2.88e-06		2.03e-05	1.48e-05	5.54e-06	2.9e-05																				9.92e-05							3.35e-06
Peptoniphilus catoniae			1.45e-05	4.19e-05										4.15e-05		0.000188875				4.99e-05	1.76e-05	2.65e-05	0.00023266																									2.35e-05
Peptoniphilus coxii													1.2e-05			6.39e-06			8.29e-06			1.1e-05
Peptoniphilus faecalis	0.000919422	0.00583705	0.00300001	0.0037067		0.000454914	1.42e-05		0.000768199		0.000319547	0.000377922	0.00026333									4.05e-05	0.00199504	0.000670415												0.000877296
Peptoniphilus nemausensis		2.15e-05		1.16e-06		2.55e-06	1.28e-05					1.53e-05	0.000106171	1.46e-05		1.46e-05	3.05e-05		1.1e-05	5.83e-05		2.11e-05
Peptoniphilus obesi		8.27e-06
Peptoniphilus phoceensis			1.47e-05																				8.62e-05
Peptoniphilus rhinitidis		4.9e-05														0.00015301		0.000438292			4.37e-05	0.000477959		0.000462326
Peptoniphilus senegalensis													8.34e-07
Peptoniphilus stercorisuis	0.00373845	0.00100079	0.000200124	0.000685538	9.66e-06	0.000439746	0.000905063	0.000172246	2.91e-05	2.82e-05	0.000203418	0.000810192	0.000107514	3e-05	1.22e-05	0.000364695	0.000775814	1.48e-05	7.66e-05	0.000497387	2.29e-05	0.000235836	0.00288416	0.00174322						0.000534611					0.000343944	0.000230979								0.000498487	0.000210845			0.00080176	0.00040386
Peptostreptococcus porci	6.39e-06			5.93e-06			4.37e-06
Peptostreptococcus russellii	0.0404479	0.00548208	1.61e-05	0.000623125	3.45e-05	0.00945464	0.00938998		1.34e-05	0.00040477	0.00161444	0.0102552	0.00304817	4.24e-05		0.000884234	0.00342212	4.89e-05	0.00100633	0.00219106	7.51e-05	0.00474731	0.0283716	0.0288557	0.000414973					0.01171				0.000446222		0.00115782	0.00114727							0.00106096	0.000326495		0.00211141	0.00399214	0.00313224
Peribacillus asahii																					2.82e-06
Perlabentimonas gracilis		1.77e-05					5.93e-06			9.78e-06
Petroclostridium xylanilyticum				4e-06
Phaeobacter piscinae																			0.000103757
Phascolarctobacterium succinatutens	0.000585913	0.00177701	0.000542199	0.000302872	0.00370374	0.00158068	0.000566983	0.000613675	0.0019498	0.0037648	0.00191954	0.00284536	0.000522983	0.00109032	0.000765654	0.00183838	0.000467571	0.000214766	0.000584244	0.00109108	0.00243388	0.000817425	0.000776626	0.00100417	0.00132439			0.000891764	0.00175992	0.000743126	0.00130424	0.000225412	0.00205188	0.00163538		0.00058517		0.00262904	0.000578146	0.00210035		0.00588928	0.00750873	0.00145263	0.000896669	0.000278743	5.27e-05	0.000388956	0.000790834
Phocaeicola coprocola	3.22e-05	1.66e-05	2.11e-05			2.1e-05				1.83e-05	1.09e-05		1.27e-05		1.59e-05					7.4e-06	1.73e-05																												2.9e-05
Phocaeicola coprophilus								0.0402922
Phocaeicola massiliensis	6.84e-05	0.000433111	0.000143118		0.000993838	0.00016979	3.63e-05	0.000234643	0.000298799	0.000360794	0.000621941	0.00017562	0.000131865	0.000331911	0.000884164	0.000162661	8.65e-05	6.24e-05	0.00012685	4.79e-05	0.000699741	0.00021475						0.000187323																				4.15e-05	0.000480872
Phocaeicola paurosaccharolyticus	4.53e-05	0.000162679		3.99e-05			6.72e-05			9.75e-06		0.000257263	0.000154409				0.000112289		0.00060496			0.000222681																						9.39e-05			9.63e-05	0.00013191	8.28e-05
Phocaeicola plebeius															2.09e-05		8.44e-06
Phocaeicola vulgatus					7.4e-05		1.11e-05							0.0292023				0.0279114										0.000194923
Phocea massiliensis		0.013044	0.00270728	0.0197096	0.0127378	2.01e-05		3.82e-05	0.0101371	0.00548169	3e-05	0.0175841		0.00889545	0.00976609	1.39e-05	8.74e-06		7.33e-05	4.59e-05	1.48e-05	0.000735576					0.040899	0.0170339	0.00140237			0.00378707	0.0154462	0.00304749		0.000787155		0.00191961	0.00356184	0.000809261		0.024043	0.0139384				0.000818442	1.77e-05	0.00752592
Photobacterium chitinilyticum																	7.63e-07
Photorhabdus heterorhabditis						2.5e-05					4.14e-05	1.6e-05										2.32e-05																										1.29e-05
Piscicoccus intestinalis						2.55e-05
Pisciglobus halotolerans	0.000433451	8.8e-05		2.31e-06	6.26e-06	0.000761302	0.00023099	2.5e-05			0.000164684	4.38e-05	9.1e-05	0.000170752	0.000129292	0.000281602	5.09e-05	7e-05	3.99e-05	0.000630994	0.000446378	0.000248936	0.000146762							0.000152302								0.0015053			0.000244458				8.43e-05			4.41e-05
Planococcus antarcticus																1.62e-05
Planococcus chinensis						6.27e-07
Planococcus soli																6.7e-06
Polaribacter pacificus														3.2e-06
Pontibaca salina																		5.02e-06
Pontibacillus litoralis	3.58e-06	4.82e-06		1.38e-06	6.88e-06			7.71e-06		3.49e-06	4.26e-06	1.11e-05		2.7e-06	3.52e-06	5.29e-06	5.83e-06	1.39e-06	2.16e-05		1.19e-05	8.95e-07						8.61e-06
Porcincola intestinalis	5.25e-06	2.65e-05		0.000280874		8.28e-06	2.53e-06				8.29e-05			0.000234539	9.89e-06		9.55e-05			1.36e-05		0.000428029																											4.42e-05
Porphyromonadaceae bacterium	0.316279	0.272412	0.305316	0.313442	0.978224	0.164705	0.483805	0.529201	0.330635	0.645854	0.280999	0.20198	0.160114	0.489542	0.424442	0.103944	0.24937	0.230171	0.214752	0.116673	0.4348	0.116133						0.231199											0.117559										0.196927
Porphyromonas catoniae								4.93e-06													6.02e-06
Porphyromonas circumdentaria		5.02e-06				1.12e-05		2.11e-05						2.25e-05							2.71e-05
Porphyromonas levii	0.000486421				0.000756339	0.00042434	0.000452177	0.000409815	0.00106551	0.000320876	0.000352003	0.000228037			0.000513562	0.000204269					0.000521217																												0.000901663
Porphyromonas loveana				0.000263589																																													2.23e-05
Porphyromonas pasteri		2.45e-06								1.61e-06
Porphyromonas somerae										0.00182775
Prevotella albensis	2.72e-06	2.52e-06	7.24e-06	6.42e-06	2.21e-05		3.7e-06		9.74e-06	1.76e-05	6.45e-06	8.99e-06		3.59e-06	1.09e-05	5.33e-06	1.21e-05		8.89e-06	3.06e-06	2.72e-05	3.95e-06						1.82e-05											5.17e-05										1.84e-05
Prevotella amnii			7.08e-06							1.59e-05	5.27e-05	4.26e-06		7.07e-05							7.46e-06																												1.36e-05
Prevotella aurantiaca	3.32e-05	5.77e-05	6.34e-05	0.000431711	3.63e-05			3.08e-05	5.28e-05	0.000104495	5.94e-05	4.1e-05	5.56e-05	1.28e-05	3.64e-05	5.58e-05	6.77e-05		3.99e-05	2.57e-05	0.000164872		7.1e-05						0.00024383																				0.000194162
Prevotella baroniae					7.14e-06	7.22e-06			2.11e-05	1.68e-05		3.96e-06									2.9e-05	4.22e-06																											1.39e-05
Prevotella bergensis		2.88e-05	4.65e-05						3.14e-05	2.68e-06										2.22e-06
Prevotella brunnea		0.000196555	0.000810315	6.64e-05	0.000496245	0.000139159	9.6e-05	7.66e-05	0.000323401	0.00034483	0.000525589	8.73e-05	0.000125356	0.000466921	0.00026749	0.000101352	0.000164708	7.89e-05	0.000203631	0.000171187	0.000149068																												0.000195535
Prevotella buccalis	5.22e-05	1.03e-05	3.24e-05	3.94e-06	7.35e-06	4.28e-06	4.51e-05	0.000104698	6.86e-06	1.03e-05	6.76e-05	6.31e-06	7.41e-06	7.73e-05	1.52e-05	3.14e-06	5e-05		9.22e-06		2.22e-05	2.63e-05	2.46e-05					7.98e-06											2.26e-05									1.43e-05	1.5e-05
Prevotella colorans	0.000153725	0.000234446	0.000185388	6.03e-05	0.000420719	0.000130787	4.62e-05	0.000113212	0.00016425	0.000327883	0.00017173	0.000116867	0.000157661	0.000141939	0.000146836	0.000203782	0.000233273	5.44e-05	0.000181305	8.75e-05	0.000459314	4.1e-05	1.99e-05					0.00010489		3.71e-05						0.000149163			6.75e-05			0.000169056			0.000199232			2.13e-05	0.000747605
Prevotella conceptionensis	1.45e-05		3.51e-06	3.17e-06	4.26e-06	8.94e-06			8.41e-06	2.92e-05	3.21e-06	3.79e-06			1.44e-05	4.3e-06	6.07e-06				5.18e-05							2.42e-05						3.7e-05															3.11e-05
Prevotella copri	0.0161565	0.0453857	0.0330991	0.0201799	0.10758	0.0238102	0.0125951	0.0251845	0.0737536	0.0759218	0.0796744	0.0431417	0.0167667	0.0232904	0.025026	0.0570397	0.0272063	0.0185725	0.0330513	0.0176342	0.0681191	0.0124035						0.00319175																				0.019568	0.132827
Prevotella corporis																																																	5.94e-06
Prevotella dentasini		2.49e-06	5.65e-06	6.45e-06	3.97e-05					1.86e-05	5.7e-06	1.53e-05		7.5e-06		3.73e-06	6.84e-06				9.16e-06																												3.35e-05
Prevotella falsenii	2.6e-05	2.18e-05	2.53e-05	0.000642251	1.28e-05	8.16e-06	4.2e-06	8.26e-05	9.4e-05	6.75e-06	2.31e-05	2.78e-05	2.03e-05	2.28e-05	2.43e-05	1.42e-05	6.32e-06		2.34e-05	1.45e-05	2.38e-05	1.74e-05																	5.3e-05									7.9e-06	3.43e-05
Prevotella herbatica		0.0278568															0.0294696
Prevotella hominis	0.0006727	0.00159886	0.000843031	0.000674742	0.00479919	0.000628758	0.000296755	0.000471541	0.0017905	0.00546814	0.00240105	0.00123758	0.000478037	0.000464641	0.0012112	0.000955204	0.000726932	0.000301247	0.00125787	0.000481554	0.00384386	0.000610331	3.17e-05	6.35e-05				0.00148505	7.97e-05					0.000238983	0.000156741	0.000192224	0.000309833	0.000161234	8.43e-05		8.75e-05		0.00161777			0.00102269		0.000346489	0.00310086
Prevotella ihumii						3.52e-06			5.45e-06	3.26e-06											1.76e-05							1.12e-05																					4.83e-06
Prevotella illustrans	2.39e-05	3.19e-05	6.41e-05	7.28e-06	4.1e-05	6.44e-06	4.65e-06	7.72e-05	0.000121836	7.09e-05	6.33e-05	9.38e-05	4.69e-05	8.36e-06	2.87e-05	3.03e-05	3.68e-05		6.32e-05	2.47e-05	5.41e-05	2.24e-05	4.12e-05																9.14e-05										0.00012883
Prevotella lascolaii	2.6e-06	9.37e-07			1.01e-05				2.8e-06	6.66e-06	2.22e-06	0.000142293		9.35e-07					0.000800892		1.09e-05		5.57e-06														5.65e-05											1.19e-05
Prevotella loescheii		4.06e-06			5.01e-06				1.68e-05	2.1e-05	2.1e-06	3.03e-06
Prevotella maculosa				3.58e-06	7.66e-06				3.27e-06	7.32e-06					3.65e-06
Prevotella marseillensis											3.2e-05	2.77e-05					4.91e-05		8.69e-05		4.31e-05	2.85e-05																	0.00013554									3.36e-05
Prevotella marshii	0.000184241	0.000121877	0.000120338	3.84e-05	0.000435455	0.0003544	3.64e-05	0.000114941	0.000173104	0.000270489	0.00019148	0.00018832	6.68e-05	0.000104904	0.000255882	8.9e-05	0.0001036		0.000122563	8.5e-05	0.000482825	8.02e-05												0.000392712															0.000393403
Prevotella micans												1.09e-05									3.39e-05
Prevotella mizrahii	0.00028853	0.000218081	0.000288986	0.000188171	0.00151835	0.000222144	0.000108682	0.000677669	0.000493887	0.000384838	0.000172903	0.000200708	0.000229404	0.000227907	0.00058134	0.000260639	0.000250652	0.000214723	0.000279114	9.26e-05	0.000813858	0.000106926	0.000253351			0.000193683		0.000594424	0.000597981	6.06e-05	0.000219022			0.000443615	0.000161172	0.000175804		0.000778482	0.000463342	0.000472109		0.000360299						7.45e-05	0.000557544
Prevotella nanceiensis	1.59e-05		2.46e-05		2.53e-05			9.19e-06	3.23e-05	3.93e-05	2e-05	6.12e-06			8.73e-06	1.94e-05	1.25e-05				6.33e-05	7.1e-06																											6.92e-05
Prevotella oralis	0.000198799	0.000234047	0.00041646	4.79e-05	0.000162623	0.000112552	1.23e-05	9.38e-05	0.000180986	0.000103674	0.000128295	0.000121409	0.000207134	0.000115354	7.61e-05	0.000131269	0.000358099		0.000147044	2.59e-05	0.000334524	3.16e-05																											0.000884887
Prevotella paludivivens		0.00196568		0.00011139			5.33e-05					1.18e-05					0.00210074	7.8e-05																															0.000443217
Prevotella pectinovora	0.000205316	0.000291665	0.000306172	0.0001787	0.00261716	0.000226471	0.000157065	0.000353794	0.000375609	0.00105116	0.00069006	0.000237858	0.000213652	0.000246046	0.000347821	0.000287342	0.000298426	0.000244826	0.000249115	9.82e-05	0.00136883	0.000107404	8.64e-05			3.96e-05		0.000879753	0.000367534	0.000138127	0.000103648	3.05e-05	0.000162734	8.55e-05					0.000177587	0.000313983	0.00026778			0.000133058		0.000345229		4.3e-05	0.00148135
Prevotella pleuritidis																																																	2.29e-05
Prevotella rara	1.17e-05	1.56e-05	5.31e-05	2.21e-05	4.62e-05	1.12e-05	3.44e-06	9.88e-06	2.61e-05	3.89e-05	2.86e-05	9.33e-06	1.46e-05	2.43e-05	3.35e-05	1.29e-05	2.35e-05	6.9e-05	1.85e-05	7.03e-06	9.58e-05	1.17e-05	3.17e-05																									6.38e-06	9.93e-05
Prevotella saccharolytica		5.3e-06							1.3e-05	1.44e-05		9.81e-06					9.4e-06		3.22e-06		1.54e-05							2.03e-05																					1.34e-05
Prevotella salivae	3.6e-05	3.88e-05	2.23e-05	4.13e-05	0.000251479	2.5e-05	9.41e-05	5.31e-05	4.62e-05	7.7e-05	8.52e-05	3.36e-05	1.37e-05	1.68e-05	6.84e-05	4.66e-05	6.27e-05	2.52e-06	3.2e-05	1.03e-05	0.000378155	2.39e-05						0.000135168											1.81e-05							4.29e-05			0.000162592
Prevotella stercorea	0.000767991	0.000628101	0.000564691	0.000739429	0.00210408	0.000471244	0.000407065	0.000860301	0.000709044	0.000975256	0.00114721	0.000433591	0.000545797	0.00026317	0.000469031	0.00033568	0.000537201	0.00365123	0.000595283	0.00021625	0.0019182	0.000309038	0.00169777		6.76e-05			0.000904852	4.54e-05	2.72e-05	2.52e-05			9.7e-05	0.000391686				0.00389021						4.25e-05	0.000134923		0.000113101	0.00180477
Prevotella timonensis	0.000575839	0.00178348	0.00376779	0.00110569	0.00293491	0.00170346	0.00095756	0.00164427	0.000811796	0.00027113	0.00320251	0.000530418	0.0011908	0.00306127	0.00489185	0.00176332	0.00198273		0.00118062		0.000693304																												0.00224426
Prevotella veroralis												2.2e-06			2.9e-06
Prevotellamassilia timonensis		0.00132914	0.00211399		9.71e-06	8.98e-06			0.00410101	1.81e-05	0.00286003	0.00111972	3.73e-05		4.41e-05	0.00228445	1.07e-05		2.37e-05		0.000200245	7.28e-06																											0.00236406
Priestia taiwanensis																						1.89e-06
Priestia veravalensis						1.77e-05
Propionibacterium cyclohexanicum				1.13e-05			8e-06																																										2.62e-05
Propioniciclava soli	3.21e-05								1.7e-05			4.11e-06																																					1.64e-05
Proteiniclasticum ruminis	1.09e-05	2.61e-06				2.98e-05	0.000360717			1.51e-05			0.000640366				3.26e-06		9.26e-05	1.95e-05		0.000897869																										8.47e-06
Proteiniclasticum sediminis		1.83e-05				2.17e-05	1.05e-05						1.47e-05				1.92e-05		4.99e-06	3.68e-06		5.17e-05																										2.8e-05
Proteus alimentorum											1.32e-05											2.51e-06
Proteus columbae						5.39e-06
Proteus faecis						1.36e-05											5.76e-06
Proteus mirabilis	6.74e-06										1.87e-05						8.02e-06																									0.000523304
Proteus sp. NMG38-2
Proteus sp. ZN5				9.7e-05	2.4e-05	6.5e-05								1.56e-05					0.000781075																									0.00144384
Proteus vulgaris						5.49e-05					9.24e-06
Provencibacterium massiliense	0.00016877	0.000175556	6.49e-05		3.75e-05	7.52e-05		0.000237036	5.49e-05	0.000164322				6.33e-05	0.000222539				3.93e-05																														8.69e-05
Providencia heimbachae											0.0164897
Providencia huaxiensis						0.00177178										4.66e-05	2.54e-06		0.00229285			0.00145431
Providencia rettgeri											7.09e-06
Providencia thailandensis											2.3e-06											2.03e-06
Pseudarcicella hirudinis				5.98e-06
Pseudobutyrivibrio ruminis			1.16e-05						1.74e-06	1.11e-05		3.15e-06				8.07e-06																																	5.45e-06
Pseudobutyrivibrio xylanivorans						9.4e-06
Pseudochelatococcus contaminans						4.47e-06
Pseudochrobactrum asaccharolyticum				9.23e-06			1.36e-05												2.52e-05																													3.77e-05
Pseudochrobactrum saccharolyticum																																																2.69e-05
Pseudocitrobacter faecalis																					1.06e-05
Pseudoclavibacter terrae							9.48e-06								9.86e-06
Pseudoduganella danionis	0.000300058	5.58e-05					5.61e-06						1.15e-05					0.000233481	0.000142159	6.27e-05		0.000787918	0.000228664	0.000309929				0.000119364																				4.67e-05
Pseudoflavonifractor capillosus	0.000291162	0.000562455	0.000169876	0.00026835	0.000664504	0.000172864	0.000105279	0.000392355	0.00027349	0.00034122	0.000190021	7.65e-05	8.23e-05	0.00032477	0.000227531	6.2e-06	0.000138848	0.000386046	0.000279564	0.000164626	0.000301745	0.00029615	0.000360437					1.82e-05	0.000422817																			0.000286997	0.000196594
Pseudoflavonifractor gallinarum		9.39e-06	1.26e-05	4.94e-06	1.78e-05	6.57e-06			8.96e-06	1.49e-05	1.07e-05	6.27e-06	1.02e-05	2.87e-05	7.09e-06	6.65e-06	3.56e-06	3.48e-05	6.73e-06		1.13e-05	1.21e-05
Pseudoflavonifractor phocaeensis	0.000116415	4.66e-05	9.41e-05	7.75e-05	0.000217635	7.83e-05	2.77e-05	9.19e-05	0.000124708	0.000104481	0.000169604	8.16e-05	6.46e-05	0.000171423	0.000145304	0.00011628	6.52e-05	8.13e-05	8.77e-05	2.15e-05	7.47e-05	3.36e-05	0.000216175					0.000154358			0.000109															5.96e-05	0.000179779	4.47e-05	9.81e-05
Pseudomonas aeruginosa														1.4e-05					0.000109612			5.53e-05	0.000314886			0.00043342												0.00060104
Pseudomonas alliivorans													1.87e-05
Pseudomonas alloputida																																																9.32e-06
Pseudomonas cyclaminis	0.000135302					0.000109852					0.000537408					0.000205412			9.58e-05				9.91e-05																									0.000105364
Pseudomonas defluvii						1.39e-05													1.35e-05				7.67e-05																									2.67e-06
Pseudomonas haemolytica											3.2e-06
Pseudomonas helleri						2.96e-05
Pseudomonas kirkiae													6.65e-06
Pseudomonas neustonica						0.000387743													0.000127991																													0.000174297
Pseudomonas pharmacofabricae																	1.9e-05		4.88e-05
Pseudomonas profundi																						3.38e-06
Pseudomonas saudimassiliensis																				0.000164131
Pseudomonas xionganensis																	1.9e-05
Pseudomonas yangonensis						8.39e-07
Pseudonocardia ammonioxydans											3.11e-06
Pseudonocardia saturnea																							2.11e-05
Pseudoramibacter alactolyticus																					2.74e-06
Pseudoramibacter porci										5.16e-06			0.000245736	5.48e-06	6.34e-06	6.15e-06	1.14e-05			3.48e-06
Pseudoruminococcus massiliensis	0.000572193	0.000164046	0.000118016	0.000179832	0.000350975	0.00014674	1.19e-05		0.00026529	0.000271141	0.000160393	2.16e-05	7.89e-05	0.000217467	7.46e-05	7.48e-05	1.11e-05		3.56e-05		3.97e-05
Pseudoscardovia radai		0.000101434					0.000697906				0.00027883					0.00123299
Pseudoscardovia suis		1e-05	0.000891365				0.000901921		0.000282153		0.00151893		2.75e-06	0.00037873		0.000727751				7.96e-05
Psychrobacter adeliensis											0.000248184
Psychrobacter alimentarius						0.000225364					0.00037034					0.000251166
Psychrobacter aquaticus											5.52e-06
Psychrobacter aquimaris						0.000978571					0.00091237					0.00029997						9.52e-05								0.000354056																		0.000109334
Psychrobacter celer					6.48e-06	7.87e-05	1.67e-05				0.000127095	0.000102695			3.77e-06	8.1e-05				1.69e-05		1.63e-05																										0.000188383
Psychrobacter cibarius	1.36e-05		2.34e-05			0.00012918	6.15e-06				0.000104828	6.37e-05				4.87e-05						3.04e-05																										3.78e-05
Psychrobacter ciconiae						0.00388736					0.000899686	0.000585051
Psychrobacter cryohalolentis						0.000155323					0.00149164					0.000269039
Psychrobacter faecalis		0.000143534			4.15e-05	0.00148937	0.000106183		3.73e-05	3.49e-05	0.00488537	8.85e-05	8.33e-05		5e-06	0.000257584	6.07e-05	6.93e-06		3.81e-05		0.000361503								0.000726091					0.00108445													0.000361057
Psychrobacter fulvigenes						0.0283093					0.00106984											0.000630332
Psychrobacter glaciei						5.62e-06					0.000101597
Psychrobacter glacincola																6.39e-06
Psychrobacter immobilis		1.65e-05				1.81e-05					0.000437883					1.84e-05						1.9e-05
Psychrobacter jeotgali						1.61e-05					4.36e-05					2.71e-05						2.89e-05																										3.53e-05
Psychrobacter luti						8.2e-06					0.00280716					3.42e-05														6.59e-05
Psychrobacter marincola						1.32e-05	8.73e-06			4.17e-06		1.67e-05				1.51e-05
Psychrobacter maritimus		1.33e-05		3.91e-06		0.0090357	4.75e-06		1.9e-05		0.0534638	8.01e-05		1.43e-05		0.0130667						0.00135992								0.000192727					0.00417512													0.00332501
Psychrobacter nivimaris						3.76e-05					8.87e-05					2.81e-05														0.000185644
Psychrobacter okhotskensis						0.000594793					0.000178956					8.32e-05						7.77e-05								3.95e-05																		1.27e-05
Psychrobacter pacificensis		8.56e-06	0.000117138			0.000287401	0.00015128				0.000460971	8.94e-06	1.98e-05			2.03e-05	1.01e-05					0.000241969																										1.96e-05
Psychrobacter pasteurii	0.000135444	9.86e-05	0.000335518	4.36e-05	3.76e-05	0.00334904	7.16e-05	1.39e-05	3.58e-05	7.1e-05	0.000203226	0.00251531	7.79e-05	3.05e-05	5.16e-05	0.00087289	2.87e-05		1.85e-05	9.6e-05		0.000339863	1.77e-05	5.54e-05						0.000824107						0.000936709					0.00074441				0.000521272		0.00104248	0.00128243	5.08e-05
Psychrobacter phenylpyruvicus	3.72e-05	1.06e-05	2.8e-05			0.000417595	2.87e-05	2.47e-05			4.67e-05	0.000134495	1.54e-05		2.15e-05	0.000100546	3.61e-06		7.21e-06	7.79e-06		5.4e-05		8.81e-05						0.000105976					0.000510543	0.000937581					0.000417219						0.000426631	7.33e-05	1.02e-05
Psychrobacter piechaudii	3.33e-05	7.82e-05	5.31e-05	2.45e-05		0.000179232	7.55e-05			2.65e-05	4.59e-05	0.000284881	1.34e-05	1.7e-06	4.31e-05	0.000131743	2.42e-05		3.43e-06	4.73e-05		4.99e-05								0.000252401																		0.000219902
Psychrobacter piscatorii	3.12e-06	3.49e-05				0.000261954	1.17e-05				0.000361892		1.61e-06		1.95e-06	0.00017802				1.81e-06		6.77e-05																										0.000101265
Psychrobacter proteolyticus											0.000502721
Psychrobacter pulmonis		0.00301749		7.98e-06		0.0485581	0.000167254		1.96e-05		0.0386173	0.00147385	0.00093453	1.67e-05		0.00444262	1.09e-05			2.71e-05		0.00791664								0.00926007					0.000973898													0.0077182
Psychrobacter salsus			5.4e-06			0.000110188					9.56e-05					2.54e-05				2.85e-06		2.49e-06																			0.000154046							4.05e-06
Psychrobacter sanguinis	9.97e-05	5.01e-05				0.000457729	0.000180156				0.00196386	0.000347937				0.000160951																																8.62e-05
Psychrobacter sp. G											7.04e-05					0.00016721
Psychrobacter sp. KCTC 72983											0.000721477					0.000251383
Psychrobacter sp. P11F6											0.00249274					0.000722457
Psychrobacter sp. P11G3						9.02e-05					2.42e-05					5.24e-05
Psychrobacter sp. P11G5		1.83e-05				0.000156216	2.52e-05				0.000285185		2.38e-05	1.53e-05	2.45e-05	0.000291663						0.000187471																										2.85e-05
Psychrobacter sp. P2G3		1.58e-05				4.69e-05					0.000256207					0.000191473						6.74e-05													0.00110084												0.00130738
Psychrobacter sp. WY6																																																0.000149353
Psychrobacter sp. YP14						0.000359922					0.000135824	0.000245185				0.000250063						0.000115874																										0.000131839
Psychrobacter submarinus											3.95e-05	1.44e-05				1.36e-05
Psychrobacter vallis	2.6e-06	5.31e-06				7.19e-05	1.06e-05				9.91e-05	3.93e-05	2.83e-06		2.35e-06	5.9e-05				7.79e-06		1.83e-05			0.000109993																							1.72e-05
Psychroflexus halocasei															5.12e-06				3.83e-06
Psychroflexus planctonicus																					8.9e-06
Puerhibacterium puerhi																						1.69e-05
Puniceibacterium confluentis	3.94e-06	5.41e-06	6.67e-06	2.36e-06	6.58e-06	5.38e-06	2.33e-06	1.7e-06	9.71e-06	1.45e-05	1.9e-06	9.33e-06	4.13e-06	1.82e-06	1.02e-05	2.83e-06	4.9e-06	3.76e-06	2.3e-06		3.57e-05	3.37e-06																											1.07e-05
Pusillimonas caeni																						2.54e-05
Pustulibacterium marinum															2.49e-06			2.88e-06
Puteibacter caeruleilacunae																		4.1e-06
Pyramidobacter piscolens																	2.16e-06
Pyramidobacter porci															4e-06		7.95e-06			8.88e-06
Pyxidicoccus caerfyrddinensis				9.66e-07					1.27e-06			9.14e-07					9.19e-07					9.67e-07
Quadrisphaera granulorum						1.67e-05
Raineyella antarctica																		3.06e-06
Raoultella ornithinolytica	1.06e-05						7.43e-06	0.000283564			3e-05						5.62e-05	0.000223515													0.000480719	0.000156939											0.00180543
Raoultibacter massiliensis			2.45e-05	1.05e-05				1.19e-05																																									2.58e-05
Raoultibacter timonensis	0.000148004	0.000162178	8.69e-05				7.2e-05				2.52e-05		0.000210733	0.000138697	0.000204951				6.29e-05	5.71e-05		4.92e-05
Rhizobium rosettiformans	5.33e-06					1.11e-05													5.63e-05	9.19e-06			9.79e-05
Rhizobium soli												4.13e-06
Rhodococcus defluvii	0.00039074																						7.53e-05
Rhodococcus phenolicus											1.24e-05		1.86e-06
Rhodococcus subtropicus	2.51e-05
Rhodococcus yunnanensis																			5.92e-06
Rhodococcus zopfii	0.000184586																						0.00015741
Rhodovulum viride					5.73e-06																							1.4e-05
Robinsoniella peoriensis	4.45e-05	3.94e-05	3.39e-05	3.95e-05	0.000149606	0.00015442	3.91e-06	0.000198187	0.000130914	2.07e-05	9.52e-05	3.08e-05	8.95e-05	0.000182867	0.000186611	0.00018539	3.15e-05	1.04e-05	3.38e-05	1.43e-05	1.95e-05	3.93e-05	3.14e-05					7.01e-05	0.000157021	0.000118416															0.000102013			2.12e-05	3.64e-05
Romboutsia maritimum				2.15e-06
Romboutsia timonensis	0.00010578	0.00090349	2.79e-05	0.00156896	4.78e-06	0.000220216		0.00012335	0.00137633	0.000230485		0.000995429	0.000163674	0.000140723	0.0018769	0.000397107	0.000126329	6.02e-05	0.000405677	0.000184956	0.00142635		0.00770529	0.0029465	0.0110166	0.000373275	0.00695576	1.62e-05		0.00181437		0.000325889	0.000134477	0.000137064		0.00340656	0.000115638		0.00215091	0.00331068	0.000162396	0.00605284	0.00125278	0.00332088	0.00254222	0.00192941	0.000497492		9.77e-06
Romboutsia weinsteinii	2.76e-06	2.85e-06	9.8e-06	9.02e-06						4.5e-06						1.87e-06					4.07e-06		3.62e-05																						5.96e-05
Roseburia faecis	0.000165679	0.000233173	0.000386085	0.000597855	0.00608629	0.000324602	2.25e-05	0.000875301	0.000900785	0.00169867	0.000204068	0.000107837	0.000278445	0.000394029	0.000375274	0.000553615	0.000173771	9.87e-05	0.000238181	0.000263725	0.00036869	5.77e-05	0.000101189	2.57e-05				0.00211291		5.96e-05	0.000154905			0.000428083					0.000101563						0.000211317			1.6e-05	0.000277416
Roseburia inulinivorans	1.45e-05	1.11e-05	8.45e-05	2.51e-05	0.00671508	2e-05	9.13e-06	0.000295198	0.000135609	0.000430401	5.12e-05	1.62e-05	1.97e-05	0.000117945	7.78e-05	3.14e-05	0.000174833	1.36e-05	3.18e-05	2.01e-05	3.25e-05	1.05e-05	2.6e-05					0.00192334			0.000344603			7.01e-05					2.53e-05						4.13e-05			2.04e-05	2.94e-05
Roseburia porci	0.000201498	0.000185593	0.00049973	0.000251161	0.00137234	0.000186792	7.72e-05	0.000295621	0.000494081	0.000874719	0.000253268	0.000158112	0.000158548	0.000425488	0.000504497	0.00048698	0.00014961	5.84e-05	0.000232273	0.000188183	0.000187412	0.000135682	0.000140462	0.000722158		0.000506235		0.000709632	0.00057577	0.000136222	0.00020165	8.44e-05	0.000319521	0.000576937	0.000567258			0.000603235	0.00045968	0.000337799		0.000470314	0.000210654		0.000112748	0.000210909		7.33e-05	0.000168684
Roseovarius nitratireducens								1.04e-06		7.2e-07
Rossellomorea arthrocnemi																		1.14e-06
Rubneribacter badeniensis	5.49e-05	0.00016329	2.21e-05	6.93e-05		3.43e-05	1.18e-05	5.31e-05	9.22e-05	7.01e-06	3.85e-05			0.000195501	8.19e-05	4.57e-05				2.24e-05	7.86e-05	7.79e-06	0.000111082	8.45e-05																									3.38e-05
Rubrivivax albus																	3.57e-06		6.85e-05
Ructibacterium gallinarum	2.32e-05	1.22e-05	1.87e-05	3.11e-05		3.81e-06	3.29e-06	2.41e-05	1.1e-05	8.81e-06	9.84e-06	4.64e-06	1.6e-05	1.56e-05	9.11e-06	1.33e-05	5.53e-06		1.77e-05	1.89e-05	2.71e-05	4.26e-06							0.000232928																				1.3e-05
Ruegeria haliotis	1.06e-06	8.2e-07	8.49e-06	3.49e-06	1.42e-05	1.81e-06			2.2e-06	3.12e-05	3.19e-06			1.71e-06	1.25e-05	2.76e-06	4.42e-06	7.35e-06	1.88e-06		3.64e-05	9.08e-06				3.1e-05		1.92e-05	5.16e-05	1.55e-05				3.33e-05					2.34e-05										5.5e-06
Ruminiclostridium cellobioparum													3.45e-06								5.87e-06
Ruminiclostridium hungatei	2.32e-05	1.59e-05	1.08e-05	6.85e-06		8.99e-06			2.69e-05	3.26e-05	2.69e-05		5.17e-06	5.37e-05	2.33e-05	3.22e-06	2.66e-06		2.05e-05	2.13e-05	1.79e-05	4.9e-06								6.63e-05																			1.7e-05
Ruminiclostridium sufflavum								4.14e-06
Ruminococcus bicirculans					0.00716789
Ruminococcus bovis	0.0914928	0.0832908	0.0819928	0.103125	0.101465	0.0495852	0.0502205	0.0628124	0.151827	0.0636832	0.0314872	0.0618496	0.0239737	0.0220236	0.100413	0.0167837	0.0161698		0.0536513	0.0173711	0.0299423	0.00966319						0.0752086																					0.0340577
Ruminococcus bromii	0.000449119	0.000254444	0.000398214	0.000439198	0.000468098	0.000515355	0.000271421	0.000355063	0.000196564	0.000168112	0.000151523	0.000176587	0.000150113	0.000314533	0.000280457	0.000118848	7.28e-05	0.00044649	0.000340153	5.08e-05	0.000177757	8.55e-05	0.000802863	0.000207234			0.000508598	0.000355793		0.000526487	0.000180362								0.000146079				0.00237009	0.000444362				6.06e-05	0.000194161
Ruminococcus callidus	1.43e-05	1.5e-05	9.52e-05	1.82e-05	4.18e-05	3.94e-05	5.81e-06		9.8e-05	4.22e-05	5.96e-05	1.7e-05	2.8e-05	3.48e-05	8.6e-06	7.2e-05	2.71e-05		1.87e-05	4.44e-06	8.16e-05	1.31e-05	9.45e-05			0.000642244		2.16e-05		2.37e-05			5.89e-05															5.09e-05	2.82e-05
Ruminococcus flavefaciens	1.98e-05	3.73e-05	3.55e-05	3.25e-05	0.000256122	9.72e-05	1.19e-05		4e-05	7.19e-05	1.16e-05	1.8e-05	1.53e-05	1.43e-05	4.88e-05	2.82e-05	1.16e-05		5.04e-05	1.58e-05	6.84e-05	2.34e-05								9.41e-05																0.000508961		1.84e-05
Ruminococcus gauvreauii		1.65e-05	3.02e-05	1.09e-05	9.51e-06	2.03e-05		1.24e-05	1.3e-05	7.23e-06	2.67e-06	3.4e-06	2.3e-05	4.86e-05	4.61e-05	4.9e-05	4.95e-06	4.9e-06	1.25e-05	2.17e-05	4.41e-05	8.01e-06																											1.81e-05
Ruminococcus sp. SR1/5			0.029458						0.0582162	0.0394686	0.0149515
Ruoffia halotolerans	0.000179121	0.000328304	0.000572035	5.8e-05		0.00125582	5.81e-05		3.85e-05	2.52e-05	0.000766022	0.00183241	0.000243412	8.13e-05	0.000136177	0.00233212	7.19e-05	1.3e-05	1.81e-05	0.0010963	3.31e-05	0.00106239			0.000281493					0.000221552					0.000233727						0.000215088			0.000151577	0.000146954			0.000633675	9.51e-05
Ruoffia tabacinasalis	0.000461943	0.000924275	0.00104636	0.000129471	2.33e-05	0.00309182	0.000118991	1.85e-05	5.47e-05	9.17e-05	0.00137903	0.00287728	0.000439864	0.000206445	0.000322386	0.00667142	6.14e-05	2.91e-05	0.000235876	0.00218363	6.51e-05	0.0031061	0.000148177	7.61e-05	0.000469	0.000602761				0.00132383						0.00145726	0.00247834		4.34e-05		0.000709762			0.000577969	0.000629861		0.00172118	0.00114997	0.000422908
Ruthenibacterium lactatiformans	0.00218644	3.08e-05	0.000128327	0.00176605	0.00034157		0.0011294	0.000899985	0.000801512	0.000132338	0.000486177	0.000149002	7.53e-05	0.000104956	0.000690137	0.000204802	8e-05	0.000353832	0.000344685	8.38e-05	3.78e-05	3.33e-05									0.000120854
Saccharospirillum alexandrii				6.42e-07		9.87e-07				1.65e-06				9.38e-07									4.62e-06							7.74e-06								5.03e-05				5.65e-05				3.9e-05
Salinicoccus alkaliphilus																1.04e-05						3.32e-06
Salinicoccus kekensis						2.52e-05
Salinicoccus qingdaonensis						9.69e-05																3.53e-06
Salmonella enterica	0.000994004	5.44e-05	2.93e-05	0.00928047	0.00362444	2.63e-05	0.00036362	0.00686772	0.00358199		5.17e-05	0.000398223	0.000175534	0.00593455	0.00556518	1.23e-05	0.00170738	0.000670382	0.000164521	1.26e-05	1.13e-05	1.03e-05	0.000149556	6.18e-05			0.00337767	0.00266905	0.00123797		0.00180513	0.000506334	0.000264705		0.00026729	0.000677723		0.00415017	0.00104476	0.00114328		0.00593011	0.000996339	0.0018877				3.29e-05	0.000153669
Salmonella sp. SAL-045														0.000318833	0.000352812
Salmonella sp. SSDFZ54								0.000486717
Sanguibacter inulinus						1.33e-05
Sanguibacter massiliensis
Sanguibacteroides justesenii							3.12e-06										3.73e-06																																2.76e-05
Sarcina ventriculi	2.17e-06	1.91e-05		7.39e-06					5.33e-06				2.02e-06						5.54e-06	2.92e-06	6.71e-06		1.96e-05																						6.36e-05
Savagea serpentis						4.76e-06
Schinkia azotoformans		1.87e-05	1.2e-05	1.41e-06		2.28e-06			6.13e-06	2.23e-06		2.49e-06	2.11e-05	1.87e-05	1.6e-05	1.98e-05			5.41e-06	2.18e-06										7.19e-05			5.31e-05
Schleiferia thermophila	2.54e-05																1.11e-05
Schleiferilactobacillus perolens	0.000112144	8.35e-05	5.67e-06	0.000144491		0.000482785	0.000492407	1.66e-05	2.42e-05	0.000153722	0.000164331	0.000122291	7.19e-05	0.000164712	6.77e-05	0.000132207	0.000194085	0.000190043	0.000151307	0.000720413	0.000907803	9.88e-05	0.000167432	0.000223	0.000139293					6.17e-05												0.000508269			0.000210507	0.000210909		6.67e-05	0.00111049
Schwartzia succinivorans																						1.73e-06
Scrofimicrobium canadense				1.43e-05
Secundilactobacillus collinoides		6.82e-05			1.59e-05		8.22e-05	2.76e-05		6.04e-05			3.1e-05	0.000145718	5.34e-05		8.67e-05	9.12e-05		0.000554796	0.000780807	5.36e-05																											2.27e-05
Secundilactobacillus folii									1.84e-05	6.45e-05		2.41e-05					9.32e-05				0.000406244			4.88e-05																								3.2e-05	0.000101759
Secundilactobacillus hailunensis	2.82e-06			1.41e-05			3.72e-05			1.2e-05				1.01e-05							3.8e-06		1.6e-05
Secundilactobacillus malefermentans	0.0143334	0.000992546		0.00113423		3.55e-05	0.00218284	0.00186772	0.00020946	0.0010755		0.000368755	0.000124544			0.000207792	0.00157971	0.00142917		0.00140655	0.00110541																								0.000652045			3.91e-05	0.000625472
Secundilactobacillus mixtipabuli		0.000116848		1.18e-06			0.000394746	0.00013276		0.000101844											0.000152097
Secundilactobacillus odoratitofui				4.26e-06			3.93e-06			7.44e-06				2.58e-05	6.05e-06
Secundilactobacillus oryzae	0.00514853	0.00153361	6.04e-05	0.000322985	3.25e-05	0.000444082	0.000463583	0.000116825	0.000253226	0.000120704	5.39e-05	0.000236442	2.09e-05	0.000622715	0.00020391	0.000250791	0.000237598	0.000374303	3.79e-05	0.000333905	0.00275362	5.58e-05	0.00270799	0.00184598	0.00673467	0.000251514	0.000968934	8.86e-05			0.000240463	0.000254066	0.000290332	0.00253177		0.000554396		0.00128109	0.000972013	0.00141163		0.00171532	0.00589095	0.00043993	0.0027848	0.0140558		5.14e-05	0.000623021
Secundilactobacillus paracollinoides		0.000104847					0.000532039			9.95e-05							8.67e-05	0.000320162		0.000255633	0.000252427																												0.000210955
Secundilactobacillus pentosiphilus		5.93e-05	1.67e-05	1.39e-05			4.4e-05	6.48e-06		1.48e-05				3.75e-06			4.75e-05	5.25e-06		9.36e-06	5.5e-06																									0.000498296		0.000106199
Secundilactobacillus silagei	1.64e-05	3.66e-05		4.9e-05			0.00021837	4.54e-05		6.77e-05		3.31e-05		9.16e-05	2.18e-05		5.31e-05	3.76e-05		8.16e-05	7.29e-05																											9.93e-05	4.3e-05
Secundilactobacillus silagincola		0.000417566		0.000103484			0.000245736			8.91e-07		0.000125708					0.000194107																																0.000306197
Secundilactobacillus similis		3.72e-05		0.000111965			0.000133939	6.73e-05	4.92e-05	0.000181594		5.65e-05		0.000328613	2.06e-05		0.000115155	8.4e-06		2.05e-05	4.9e-05				0.000245682						0.000116868												5.06e-05			0.000175126		1.08e-05	2.15e-05
Secundilactobacillus yichangensis		3.38e-05		4.82e-06			9.61e-05										2.83e-05			0.000234217	0.000706157													0.000310292												0.000796628			2.03e-05
Sedimentibacter acidaminivorans																			3.21e-06
Sedimentibacter hydroxybenzoicus													1.39e-06									1.32e-05
Segetibacter koreensis		2.65e-05									1.69e-05					9.43e-06			2.61e-06	2.52e-05		4.91e-05																						0.000155366
Selenomonas bovis		1.28e-05		0.000109189					1.81e-05		4.07e-05	1.06e-05				4.65e-06	3.54e-05	1.74e-05	3.64e-05			1.86e-05																										3.19e-05	0.00014252
Selenomonas montiformis											1.83e-06				2.44e-06	1.88e-05				4.95e-06		6.61e-06
Selenomonas ruminantium									5.88e-06
Sellimonas caecigallum	2.95e-05	2.03e-05	0.000124047	0.000124972	2.91e-05	0.000151129	4.93e-05	0.00050081	0.000206876	8.21e-05	8.94e-05	0.000232933	1.5e-05	0.000321544	0.00030492	8.25e-05	1.29e-05	1.71e-05	1.86e-05	0.000174811	5.86e-05	0.000160584									0.000812519																	0.000156046
Sellimonas monacensis				5.32e-05	1.11e-05			0.000185378						4.84e-05	4.36e-05						5.65e-06
Senegalia massiliensis																								5.25e-05
Senegalimassilia anaerobia	0.00140999	0.000658837	0.000169447	0.000965197	2.37e-05	1.28e-05	0.0012561	0.00234108	0.0020315	1.62e-05	7.87e-05	8.13e-05	8.72e-06	4.09e-05	2.79e-05			2.54e-05	2.66e-05	0.000627315	6.15e-05	3.7e-05	0.000148404								0.000130515																	0.00073338	6.96e-05
Serinibacter arcticus																						1.72e-06
Serinicoccus profundi																						3.5e-06
Sharpea azabuensis	2.01e-05	3.14e-05	2.98e-05	0.000124285		3.82e-05	0.000188841		6.82e-05	2.24e-05	3.66e-05	1.81e-05	3.1e-05	0.000118554	5.72e-05	4.91e-05		2.29e-05		2.25e-05	4.01e-05	2.3e-05								9.54e-05																		5.79e-05	2.94e-05
Sharpea porci	8.05e-05	4.03e-05	8.03e-05	1.81e-05	7.19e-05	4.85e-05	0.00116561	6.39e-05	5.93e-05	9.21e-05	9.3e-05	0.000135837	4.99e-05	0.000831428	0.000207503	6.11e-05	0.000256741	3.47e-05		2.36e-05	2.52e-05	2.84e-05		0.00049715												0.000168569		0.00207599		0.00124581		0.000360849						3.06e-05
Shewanella aestuarii																																					6.74e-05
Shewanella hafniensis	5.67e-06										4.56e-06
Shigella boydii		3.06e-05		0.00351432	0.00297229		5.88e-05				0.000647841			0.00266045			3.19e-05			1.04e-05			2.22e-05					0.00217806	0.000770134			0.00103813	0.000185158					0.00269523					0.00124215
Shigella dysenteriae	2.38e-05													0.0022952	6.99e-05			9.39e-06		6.79e-06	1.37e-05		6.53e-05			0.000631992			0.000161902			0.000665234		0.000215969				0.00161791		0.000673817
Shigella flexneri	0.00152195		2.25e-05		0.0165574	0.00108709	1.5e-05			1.01e-05	0.000130562		0.000488417			2.99e-05	0.000594445		0.00150502			0.000564923	0.000542254	0.000210723				0.00626681	0.0123143													0.00392625
Shigella sonnei					4.4e-05			0.000146843			9.51e-06			0.0013375	0.000859534	1.4e-05	0.000497732														0.000299734							0.00228429	0.00233616	0.00249129
Shimwellia pseudoproteus														0.000514862	7.54e-05													7.79e-05											0.00025757
Shinella granuli							5.21e-06
Sinanaerobacter chloroacetimidivorans	0.000692517	0.000409038	0.000137381	0.00060807	0.000316494	0.000148308	0.000348809	0.000306032	0.000231731	0.000395626	0.000204684	7.35e-05	0.000219733	0.000940993	0.000561607	0.000515511	0.000188517	3.72e-05	0.000199322	0.000188707	0.000349036	0.000314521	0.000176892					0.000145328																				2.83e-05	3.7e-05
Slackia equolifaciens	7.55e-06	3.74e-05	1.72e-05	4.06e-06				1.36e-05	4.16e-05	1.83e-05	4.8e-06	6.31e-06	1.94e-05	9.46e-06	2.59e-05	1.4e-05		1.49e-05	1.31e-05	1.35e-05	2.76e-05	2e-05																										7.96e-06	2.83e-06
Slackia faecicanis			1.52e-05			1.91e-05				9.92e-06	9.66e-05	1.92e-05		3.39e-05		0.000123208	2.67e-05		8.07e-05	2.87e-05		1.35e-05
Slackia isoflavoniconvertens	0.000142756	0.00034207	0.000579367	0.000607347		0.000418292	0.000323417	0.000404962	0.000753107	0.000381926	0.000268386	0.000217104	0.000508577	0.000410614	0.000668208	0.000359419	0.000151308	3.83e-06	0.000337032	0.000449797	0.000367991	0.000306735										0.000400546																0.000315712	1.59e-05
Sneathiella glossodoripedis																			2.11e-05
Sodaliphilus pleomorphus														0.0229789
Solibacillus isronensis						8.83e-06	1.89e-06				1.8e-05								1.05e-05	8.5e-06		2.88e-05
Solibacillus kalamii						5.53e-05					0.000194501								4.97e-05			0.000128641
Solirhodobacter olei		8.34e-07
Solobacterium moorei	0.000705475	8.5e-05	0.000647087	0.00204421	8.67e-05	1.07e-05	6.52e-06	3.26e-05	0.000159736	2.24e-05	1.08e-05	6.77e-05	0.000107671	0.0026617	0.00181347	0.000199109	0.000497323	1.5e-05	0.000351013	0.000487987	0.000166297	0.000301856				0.000569377		3.14e-05	8.56e-05				7.95e-05													8.48e-05		0.000255525	1.73e-05
Soonwooa buanensis																			5.12e-05
Sphaerochaeta halotolerans	3.85e-05					1.54e-05					9.98e-06	1.22e-05			1.84e-05	1.25e-05	5.29e-05		1.65e-05		0.000109287		0.000103781																										0.00019086
Sphingobacterium alimentarium							3.2e-06												1.22e-05
Sphingobacterium arenae																			1.05e-05
Sphingobacterium bovisgrunnientis							5.65e-06															1.26e-05
Sphingobacterium cavernae							5.96e-06															3e-06
Sphingobacterium chungjuense																			2.03e-06
Sphingobacterium endophyticum							2.57e-06
Sphingobacterium faecium						9.75e-06
Sphingobacterium humi		6.68e-06					4.43e-06													1.78e-05
Sphingobacterium litopenaei											2.93e-06
Sphingobacterium lumbrici		4.77e-06			4.44e-06
Sphingobacterium micropteri												1.96e-05
Sphingobacterium mizutaii							1.15e-05
Sphingobacterium multivorum						8.21e-06									5.89e-06	1.42e-05						1.6e-05													0.00014367												0.000158093
Sphingobacterium nematocida							2.52e-06
Sphingobacterium soli							0.000408225
Sphingobacterium yanglingense							1.34e-05
Sphingobium faniae						2.51e-05
Sphingobium soli							6.3e-06
Sphingomonas glacialis							2.33e-06
Sphingomonas hominis																								9.89e-05				0.000113901											0.000230308
Sphingopyxis flava		4.1e-06					6.86e-06
Spongiactinospora gelatinilytica			1.81e-06
Sporanaerobacter acetigenes																			1.78e-06	2.41e-06
Sporobacter termitidis	0.000140967	0.000164669	0.000159886	8.91e-05	0.000165729	0.000202121	0.000131213	5.72e-05	0.000109613	0.000207932	0.000178623	9.34e-05	0.000143758	0.000160352	0.000174278	0.000210287	5.35e-05	3.68e-05	9.36e-05	5.26e-05	0.000271209	0.000119328	4.62e-05					4.69e-05											9.9e-05										0.000195704
Sporolactobacillus inulinus											1.26e-05
Sporolactobacillus putidus		1.25e-05					2.28e-06																																										1.16e-05
Sporosarcina aquimarina				6.4e-06			1.26e-05			7.65e-06	0.000444645		6.09e-05	2.88e-05	7.83e-06	8.92e-05	7.19e-05		0.00012514	1.21e-05	2.92e-05	1.76e-05													0.0023212		0.00088738							0.00122491
Staphylococcus arlettae			3.94e-05								2.97e-05
Staphylococcus aureus	0.00136326	0.000202791	4.45e-05	0.000969047	9.66e-05	0.00157887	2.66e-05		8.12e-06	1.23e-05	0.000212494	5.57e-05	0.000100412	2.21e-05	5.92e-05	1.83e-05	0.000150931	7.97e-05	7.53e-05	2.82e-05	6.74e-05	0.000182314	0.00314591	0.00339237		0.000364093			0.000203232	0.000311127	0.000143199				0.00224666		0.000877413	0.000481085		0.000638093		0.00170211	0.00230953	0.00283483	0.000315941		0.00102834	7.29e-05
Staphylococcus borealis															6.43e-06
Staphylococcus caeli	6.92e-05		1.05e-05	3.41e-05		4.57e-05		1.18e-05					7.23e-05	8.04e-05	6.74e-05		0.00447998		0.000811624	1.71e-05		4.65e-05																		0.00100676		0.0319845		0.00858824	0.000150825		0.000313009
Staphylococcus chromogenes																																											0.00115814
Staphylococcus cohnii											0.000143663								0.0307833
Staphylococcus condimenti											4.89e-05				7.79e-06				0.00019507	6.92e-06															0.000522174									0.00120897	0.000369569
Staphylococcus cornubiensis																																								5.14e-05
Staphylococcus devriesei			2.22e-05																		2.56e-05																		9.03e-05
Staphylococcus durrellii																				1.15e-05		2.06e-05
Staphylococcus edaphicus														1.13e-05					3.87e-06	1.88e-05
Staphylococcus epidermidis						1.25e-05					0.000113181	1.2e-05							8.82e-06	1.37e-05		1.21e-05													0.000481078									0.000161372	0.000596009
Staphylococcus equorum											0.00724671				5.91e-06	0.00628465			2.41e-05	2.84e-05		6.94e-06																						0.00030108	0.00012463
Staphylococcus haemolyticus											4.52e-06
Staphylococcus hominis														3.82e-06							1.72e-05																							0.00140931	0.000752371
Staphylococcus rostri														3.95e-06	1.12e-05																													0.00113068
Staphylococcus saprophyticus											0.000204566									0.00204701		1.82e-05
Staphylococcus singaporensis	0.00552184			0.000395105		9.47e-06		6.02e-05		0.000171791			1.79e-05	0.000593399	0.00029842			0.000187494			0.000140427	9.65e-06	0.0254692	0.0170074	0.000135456		0.00029133							0.000158377				0.00107427	4.27e-05	0.000241401			0.00534117	0.000373007			0.000282099
Staphylococcus sp. T93	0.0124406	7.4e-05				0.00159556	0.000126209	0.00226523	0.000145742		0.000304491	2.99e-05	0.000105195	0.000100221	6.03e-05	0.00011543	0.000294906	0.00102514	0.000115265	0.000118751	0.00030718		0.0140701	0.0114962						0.00294765	0.00331856	0.00287709	0.000352917				0.000928534		0.000138999			0.00149547	0.00635948	0.000881003	0.000297059		0.000694802	0.000179968
Staphylococcus ureilyticus						2.87e-06						4.45e-06	6.61e-06			4e-06			0.000147682
Staphylococcus warneri				0.000583974						0.000140004	6.78e-05			0.000197198	0.000367602					1.26e-05	2.14e-05	1.14e-05																											0.000130613
Staphylococcus xylosus						1.18e-05					6.16e-06									1.11e-05										0.000148533														0.000142925	0.000298747
Stecheria intestinalis	0.000508187	0.000153642		0.000241868			2.55e-05	7.99e-05	2.64e-05	2.61e-05	3.73e-06	5.24e-05	0.000144073	0.000478839	0.000119387	1.1e-05	5.1e-05	0.000183209	7.43e-05	4.23e-05	8.91e-05	0.000197674	0.000163026					7.66e-05			9.14e-05																		8.87e-06
Stenotrophomonas ginsengisoli						6.37e-05	1.82e-05					1.79e-05	3.27e-05						9.19e-05			1.04e-05
Stenotrophomonas koreensis						2.28e-05	3.41e-06					4.36e-06
Stenotrophomonas pictorum							1.3e-05					2.64e-06							2.32e-05
Streptococcus acidominimus		0.000414373	0.000673881			0.000723836	3.8e-05	0.000293802	0.000262075		0.000797355	0.000165063			0.000835467	0.000156154														0.000518065
Streptococcus alactolyticus	0.0143116	0.234217	0.174744	0.00144416	0.000689737	0.140616	0.00669193	0.0297009	0.100731	0.0114578	0.115271	0.0349468	0.00759834	0.0235498	0.0419862	0.197881	0.000243534	0.00195338	0.00190518	0.0986464	0.00118553	0.0021847	0.00118202	0.00244631	0.0511415	0.050179				0.0279926	0.00453907	0.00359407	0.0201985	0.00405372	0.0128658	0.00201797	0.00174893	0.00240191	0.00397039	0.0108763	0.0174162			0.00163631	0.0208467			0.0191711	0.0332615
Streptococcus caballi					5.01e-05	6.84e-05	2.31e-05			1.66e-06				6.13e-06	1.76e-05			4.45e-06	8.48e-06	6.87e-05	4.61e-05	3.5e-06						3.05e-05
Streptococcus criceti	2.3e-05	1.72e-05						3.41e-05													0.000690995
Streptococcus danieliae				1.63e-05
Streptococcus equi														9.1e-06							2.15e-05
Streptococcus equinus		0.000143264	5.63e-05			6.48e-05	1.03e-05		0.000126055		2.06e-05	3.68e-05	3.64e-05	0.000532735	0.000452227	0.000106641				0.000261363																													3.68e-05
Streptococcus ferus	0.00950847			0.00646582										0.00462156						0.00568214
Streptococcus gallolyticus	0.0417123	0.00790445	0.0063853			0.00226916	0.00113002	0.00162382	0.00481962	0.000133473	0.00611971	0.0021217	0.000274586	0.302698	0.262812	0.00207505				0.02011	0.0127145					0.00176344				0.00114728															0.00708325			0.00020051	0.000812055
Streptococcus halitosis															1.79e-06					3.54e-06
Streptococcus henryi		5.08e-05			8.73e-06	3.19e-05					0.000159875	1.25e-05				6.38e-05				1.51e-05
Streptococcus hillyeri																		4e-06								4.9e-05
Streptococcus hyointestinalis	0.11296	0.0378076	0.0683419	0.0923243	0.0704615	0.129781	0.0136135	0.118921	0.0580256	0.0243052	0.0324885	0.0207706	0.0330348	0.0270861	0.0590076	0.00693559	0.0147305	0.0192303	0.0182334	0.0616101	0.0623186	0.0165664																										0.0167725	0.0228048
Streptococcus hyovaginalis	0.00106268	5.39e-06		0.00139341	0.000784813	0.00044903	8.92e-05	0.00218456	0.00321778	0.00107111	0.000351043	0.000346566	0.00291202	0.00219644	0.000728855		0.000415616	0.0017749	0.000467612	0.00241321	0.0013446	0.0018201	0.00287083	0.00267738			0.00402649	0.000428294		0.000408904	0.00068433	0.000597523	0.00167384		0.00073563		0.00575136		0.000766567	0.000564781	0.000300749	0.000828596				0.00099996			0.00145963
Streptococcus loxodontisalivarius				2.67e-05											1.35e-05						2.79e-05		8.64e-05
Streptococcus macedonicus	0.00010387	0.000358768		1.27e-05		0.000239548	0.000502268					3.2e-05	9.94e-05	0.000352881		0.000492546		4.26e-06	5.82e-06	0.000287377	7.77e-06																											0.000106536
Streptococcus minor															1.02e-05
Streptococcus orisasini			2.22e-05											2.44e-05	1.88e-05	0.000215952			3.17e-05
Streptococcus orisratti	8.63e-05	2.82e-05	4.32e-05	0.000309395		2.07e-05	0.00011662	3.23e-05		2.23e-05	8.31e-06		5.96e-06	0.000190044	0.00012476		7.56e-05	0.00015897		7.76e-06	2.16e-05																					0.000608199							8.58e-05
Streptococcus ovuberis		4.54e-05		0.000441812	0.000186435	0.000123047		0.000306788	0.000233393											0.000178477	0.000527315									0.000188769
Streptococcus parasuis				3.92e-05		0.0119871	0.00441925
Streptococcus parauberis		5.02e-05				0.224263							0.0116516				0.00104622													0.0815201
Streptococcus plurextorum				9.47e-06	0.000162448	0.000441578	2.87e-06	0.00013453	8.38e-05	5.06e-06	5.61e-05	3.32e-05	8.45e-05	2.96e-05	6.89e-05	9.3e-06	5.88e-06	8.8e-05			0.000194316	2.13e-05						1.52e-05		0.000290816	0.000157869	0.000118971	6.53e-05										0.00295038					1.87e-05
Streptococcus porci														5.5e-06
Streptococcus pyogenes			4.28e-05																							0.000311343
Streptococcus suis		1.93e-05				0.000349111			8.9e-06				1.45e-05	2.17e-05	2.74e-05						0.000138296									0.0029789
Streptococcus thermophilus		0.000290048	0.000448334	5.92e-06		0.000194192	6.77e-05	0.000409588	0.00125644	4.32e-05	0.000537137	3.27e-05	2.63e-05	0.000338343	0.000172399	0.000274906	3.14e-05	0.000321373		0.000551764	4.74e-05	0.000101113			0.00156641	0.00217672		6.59e-05		0.000390721	0.00124315	0.000599211	0.00293576	0.00208328	0.00209778	0.000573343		0.00237596			0.000361648		0.000853348		0.00164078			3.39e-05	3.84e-05
Streptococcus thoraltensis			6.58e-06
Streptococcus ursoris										7.07e-05
Streptococcus vaginalis		8.31e-05	1.43e-05							3.81e-06				0.000520296	0.000923185			1.28e-05	0.000104714	0.000692293										0.000161449					8.96e-05				1.97e-05						0.000191333			8.58e-05	2.12e-05
Streptococcus vestibularis								4.09e-05		8.61e-06
Streptococcus vicugnae	0.000226361	0.00467808	0.00338241	2.32e-05		0.00273248	0.000201698	0.000448597	0.00242616	0.000245229	0.00273372	0.000707035	0.000368794	0.00184036	0.0031436	0.00914935		0.000155465		0.00435679	8.82e-05	0.000139159		0.000478257	0.0019601					0.00132781			0.000522868		0.000490715	0.000482513			0.000659266						0.000384152			0.000236751	0.00053007
Streptohalobacillus salinus							9.51e-06						4.15e-06							4.71e-06		4e-06
Streptomyces abyssalis																													1.04e-05
Streptomyces brasiliscabiei						2.78e-05							1.6e-05																																			2.46e-05
Streptomyces caelestis								4.65e-06		2.44e-06						2.51e-06					7e-06							7.47e-06			1.26e-05		2.04e-05						3.37e-05										2.85e-06
Streptomyces djakartensis		1.61e-06								1.65e-06										1.69e-06
Streptomyces galbus	1.12e-06	6.16e-07		1.3e-06		7.49e-07	4.74e-07			6.11e-07			2.22e-06	7.7e-06	5.76e-06				1.91e-06	6.69e-07	4.96e-06	2.01e-06	4.47e-06																										2.34e-06
Streptomyces javensis						1.42e-06			1.53e-06	1.01e-06
Streptomyces longisporoflavus		2.39e-06	1.31e-05	8.77e-06	5.02e-06	1.37e-06			1.24e-06	1.67e-06	4.12e-06	6.23e-06	1.62e-06		1.4e-06		9.94e-07		2.89e-06		2.53e-06	1.63e-06						2.04e-05		1.43e-05	1.34e-05		2.5e-05	3.91e-05					2.84e-05	8e-05									2.1e-06
Streptomyces lunaelactis																						3.27e-06
Streptomyces marokkonensis																		0.00145582																					0.000335981	0.000382029		0.000239282	0.000910688
Streptomyces oryzae												4.1e-05
Streptomyces polyasparticus																		1.11e-05									0.000502807
Streptomyces purpurascens		2.67e-06
Streptomyces ruber				1.32e-06
Streptomyces tendae	1.25e-06												3.07e-06										8.94e-06
Streptomyces tibetensis	4.95e-06																						8.75e-06	6.63e-05				2.44e-05						5.51e-05
Streptomyces viridodiastaticus		1.38e-06				1.18e-06			1.99e-06	2e-06			3.94e-06	2.49e-06
Subdoligranulum variabile	0.00825053	0.000102185		0.00152546			2.6e-05	3.63e-05					8.01e-05	0.0893588	0.0228098	6.27e-05		0.0132243	1.76e-05	5.46e-05	4.95e-05	3.45e-05	0.000909441	6.17e-05
Succiniclasticum ruminis																						4.64e-06
Superficieibacter electus																0.000114011													0.00048408		0.000173872								3.02e-05
Sutterella massiliensis				6.73e-07
Sutterella parvirubra				5.52e-06	9.45e-06			1.2e-05		4.21e-06	8.58e-06					6.84e-06					4.8e-06																												2.77e-05
Sutterella seckii		2.47e-06				1.3e-06						1.07e-06
Synergistes jonesii				4.92e-06			8.06e-06						3.17e-06				8.33e-05	1.39e-05				2.28e-06
Tabrizicola algicola				1.52e-05
Taishania pollutisoli															2.52e-06
Tamlana crocina	1.85e-06													2.59e-06			7.15e-07	2.55e-06																				4.73e-05
Tenacibaculum aiptasiae									2.28e-06
Tepidibacter formicigenes																						1.81e-06
Tepidibacter thalassicus																						1.15e-06
Tepidimonas charontis												2.1e-06		1.38e-06	1.48e-06				2.22e-06		3.83e-06
Terrisporobacter glycolicus	0.000309632	0.000595948	0.000560959	0.00205061		0.000231215	6.37e-06	0.000370566	0.000734287	0.000589838	1.67e-05	0.000561433	0.000462263	0.000466696	0.000714871	0.0024238	0.000213981	5.56e-05	0.000423107	0.000267417	0.000448634	0.000113417	0.00161629	0.00109337						0.00242322		0.00104402	0.000441197	0.000405409					0.000359663		0.00281429	0.000524221							0.000508756
Terrisporobacter mayombei	1.85e-05	4.13e-05	0.000221264	0.000227562		1.2e-05	2.91e-06	5.86e-05	4.11e-05	2.32e-05	6.86e-06	6.38e-05	1.36e-05	0.000103559	3.02e-05	0.000225156	6.61e-05	1.43e-05	2.33e-05	8.63e-05	3.44e-05	6.52e-06	0.000190881	9.16e-05		0.000203041	0.000558967		3.69e-05	7.55e-05						0.000236893		0.000212896	0.00216054		0.00027685		0.000229665					2.18e-05	0.000162144
Terrisporobacter othiniensis	0.000388553	0.000616466	0.000793131	0.00155422	3.89e-05	0.000148537	5.54e-05	0.000422956	0.000828043	0.000423619	8.5e-05	0.000562771	0.000353258	0.000488436	0.000800853	0.00131174	0.000175322	0.000156789	0.000536543	0.000318003	0.000371802	0.000115507	0.00266423	0.00116689	0.00161861	0.000557915	0.00272262	4.07e-05		0.0013505	0.000761805	0.000101539	0.000257421	0.000130602	0.000219105				0.000730597	0.00245516	0.00267248			0.000731571	0.000318484	0.000859634	0.000212827	8.25e-05	0.000287088
Terrisporobacter petrolearius	5.83e-06	0.000176015	3.72e-06	0.000299286					5.36e-06	0.000144182		0.000144631		2.65e-06	0.000255739	0.000373119					7.29e-06		1.08e-05		0.000193243	9.84e-05	0.000259389					8.34e-05		0.000154069			0.000180262				0.000204435
Terrisporobacter sp. MCA3				0.000108424
Tessaracoccus bendigoensis		4.77e-05				8.5e-05																																											1.74e-05
Tessaracoccus flavus																						2.24e-05
Tessaracoccus oleiagri		2.39e-05																				3.63e-05																										2.56e-05
Tessaracoccus rhinocerotis		1.31e-05					9.62e-06
Tetragenococcus muriaticus				1.8e-05																2.74e-05
Tetragenococcus osmophilus																				0.000345071
Tetragenococcus solitarius	0.000128943	2.88e-05	3.09e-05	5.06e-05	2.9e-05	0.000439586	1.09e-05		2.25e-05	1.83e-05	0.000112073	0.000136309	7.99e-05	8.18e-05	9.66e-05	0.000396356	4.78e-05	3.73e-05	1.88e-05	0.000390449	0.000201394	0.000234566	3.25e-05							7.2e-05																		9.4e-05	2.96e-05
Thalassobius taeanensis							4.63e-06
Thalassococcus profundi		6.97e-06	2.17e-06	3.88e-06	5.08e-06	4.62e-06	1.12e-06		6.29e-06	1.26e-05	4.33e-06	8.84e-06		1.8e-06	7.16e-06	3.01e-06	1.54e-06	2.65e-06	4.16e-06		7.61e-05	4.18e-06						9.39e-05	6.22e-05					7.22e-05					5.99e-05							9.67e-05			9.16e-06
Thauera terpenica																	7.37e-06
Thermaurantimonas aggregans																																																	4.16e-05
Thermophilibacter mediterraneus	5.59e-05		2.06e-05				1.91e-05	3.06e-05	4.61e-05	2.06e-05		1.44e-05	4.67e-05	8.67e-05	4.89e-05	4.12e-05	8.16e-06	3.63e-05	7.46e-05	4.41e-05	0.000149288	4.83e-05								0.000108863
Timonella senegalensis																			1.48e-05			5.58e-05
Tissierella creatinini		1.21e-06				2.87e-06						1.35e-06	2.11e-06						2.86e-06			4.84e-06												5.29e-05
Tissierella creatinophila	1.52e-05	4.8e-05				0.000173344	6.07e-05				6.81e-05	9.67e-05	5.64e-06			5.98e-06	3.87e-06		2.11e-05	3.11e-06		4.34e-05	2.19e-05							0.000107494																		2.46e-05
Tissierella praeacuta	0.000638726	0.000167258		0.000156272		0.000150861	0.000206647				5.7e-05	0.000134685	5.66e-05			7.81e-06	4.78e-06			4.55e-05		5.62e-05	0.000595754	0.00081985																								0.000196906
Tomitella biformata	0.00124873																						2.53e-05	0.00010049
Tractidigestivibacter scatoligenes	2.85e-05	1.51e-05	1.72e-05	3.52e-05			4.18e-05		7.58e-06	6.74e-05	0.00012167		3.01e-05	0.00037019	2.14e-05	4.5e-05	1.13e-05	5.58e-05	1.33e-05	2.88e-06	2.45e-05	1.53e-05																	0.000211712
Treponema berlinense	0.000703111	0.000688529	0.00203027	2.17e-05	0.000223061	0.00123003	2.33e-05	7.36e-05	0.000502672	8.47e-05	0.000439843	0.000314834	0.000715478	0.000303851	6.11e-05	0.000357847	6.39e-05	8.35e-06	0.000103277	7.21e-05	0.000252564	1.13e-05	3.26e-05					2.25e-05											3.85e-05										0.00113144
Treponema bryantii	3.9e-05	5.14e-05	2.83e-05	8.18e-06	1.11e-05	6.97e-05	2.52e-05	5.86e-06	8.56e-06	1.07e-05	4.32e-05	4.06e-05	1.85e-05	9.82e-06	1.54e-05	4.41e-05	1.84e-05	2.47e-05	3.87e-05	1.02e-05	0.000125977	2.08e-05								4.93e-05																			8.05e-05
Treponema lecithinolyticum			7.77e-06																		8.4e-06
Treponema pectinovorum	2.36e-05										1.15e-05					1.92e-05					3.06e-05																												2.47e-05
Treponema porcinum	0.00334168	0.00159603	0.000964312	0.00229226	0.0008883	0.00501873	0.00025377	0.00101311	0.00121464	0.000943322	0.00071417	0.00184496	0.000996767	0.00122981	0.00235517	0.00136754	0.000474897	0.000488366	0.00195397	0.00101902	0.00239221	0.000745687	0.000414023					0.00014722		5e-05								0.000201247	0.000287559										0.00137805
Treponema rectale	4.33e-05	1.76e-05									1.62e-05	7.7e-06				3.16e-05					6.23e-05																												4.76e-05
Treponema saccharophilum																																																	4.21e-06
Treponema succinifaciens	0.00914857
Treponema zioleckii	9.93e-06	3.74e-06	2.28e-06				5.34e-06	1.08e-05	9.31e-06	1.43e-06	6.01e-06	1.69e-05				4.56e-06					1.5e-05	1.54e-06																											7.25e-06
Trichococcus collinsii				2.15e-05
Trichococcus flocculiformis	3.02e-05	5.89e-05	4.57e-06	1.78e-05	5.74e-06	0.000300503	4.45e-05		2.43e-06	1.23e-05	0.000107555	5.03e-05	3.2e-05	3.62e-06	2.7e-06	0.000316716	2.36e-05		4.77e-06	2.85e-05		0.000106429								0.000342073																		3.15e-05
Trichococcus ilyis	6.97e-06	5.78e-06				0.000901613					1.83e-05	4.71e-06	1.35e-05			2.93e-06				1.66e-05		0.000165496
Trichococcus patagoniensis						1.25e-05					8.64e-06
Trinickia symbiotica																								2.49e-05
Tritonibacter horizontis	4.27e-06
Trueperella bernardiae	3.72e-05	4.84e-05				3.2e-05						3.97e-05				4.58e-05						0.000188994
Trueperella pyogenes														0.0100469	0.00838585
Tsukamurella conjunctivitidis																				7.76e-07
Tsukamurella sputi						1.64e-06														4.15e-06		2.06e-06
Tsuneonella deserti																																												2.11e-05
Tumebacillus flagellatus												3.65e-06																									3.08e-05
Turicibacter sp. H121	0.0113707	0.0338841	0.035528	0.085545	0.0131388	0.0156091		0.0546397	0.0216964	0.0332518	0.0116004	0.0304691	0.0505433	0.0558321	0.0665236	0.0619783	0.0118007	0.0284717	0.0510588	0.0474179	0.0705149	0.00801454	0.101476							0.0875711																		0.0130971
Tyzzerella nexilis	1.66e-05	3.13e-05	8.33e-05	2.18e-05	6.43e-05	2.3e-05	5.07e-06	4.24e-05	2.02e-05	3.02e-05	1.81e-05	1.68e-05	3.44e-05	4.59e-05	4.82e-05	7.32e-05	6.42e-06	4.03e-05	3.73e-05	2.25e-05	1.66e-05	3.63e-05	5.98e-05	6.46e-05		0.00011398		5.39e-05	0.000120003			0.00012006															9.19e-05	0.000162636	2.9e-05
Undibacterium oligocarboniphilum																		6.16e-06
Ureibacillus chungkukjangi						5.81e-06					2.38e-06
Ureibacillus massiliensis			2.62e-06			4.35e-06	8.13e-06				2.58e-06	6.47e-06	2.4e-06			5.82e-06	5.96e-06		1.47e-05	2.97e-06		1.31e-05																				0.000267336						6.51e-06
Ureibacillus xyleni																						2.55e-06
Urinicoccus massiliensis										9.75e-06						1.86e-05			1.22e-05			7.53e-06
Urinicoccus timonensis							2.91e-05
Ursidibacter maritimus																						2.37e-06
Vaginisenegalia massiliensis	0.00521418	6.75e-06				0.0004428					0.000146784	1.35e-05				0.000803961	0.00154635					0.000183483								0.000164097											0.00139793							9.35e-05
Vagococcus acidifermentans			2e-05									5.68e-06									4.68e-06
Vagococcus bubulae	0.00102642	0.000242709			5.98e-06	0.000144843	0.00115964			3.71e-06	0.00158453	0.000741917	0.0011959	0.000162258	0.000363712	0.00476079	0.000680514	1.6e-05	0.000214832	0.00321613	0.000512708	0.000681842	5.75e-05							0.000781888					0.000539898	0.000203133	0.000436777				0.000759287	0.000544391	0.00171313	0.000122834	0.000401233	0.000285141		0.00077068
Vagococcus carniphilus	0.00363811	0.00392499		0.000128913		0.00520017	0.00261955				0.0074112	0.000230788	0.000366707	0.000335625	0.000281523		0.000196008			0.000243658		0.000167587																										0.00111078
Vagococcus elongatus	0.000546485	0.000802752	9.36e-06	1.95e-05		0.000663825	0.000145317			1.01e-05	0.000303955	0.000450415	9.51e-05	3.55e-05	9.76e-06	6.95e-05	9.43e-05	8.37e-05	3.24e-05	2.16e-05	2.31e-05	0.000489286	0.000888576	0.00075922	0.000301841					0.000121362					0.000430068			0.000558495			0.00062914		0.000842923	0.000330323				1.84e-05	1.68e-05
Vagococcus entomophilus							1.95e-06				2.88e-06	4.73e-06	1.34e-05			9.75e-06				1.77e-05		3.61e-06
Vagococcus fessus											6.31e-06									8.11e-06		2.98e-06								4.69e-05
Vagococcus fluvialis	0.0417576	0.00460573	6.81e-05	0.00317367		0.0245345	0.0237216				0.029249	0.0067859	0.00450981	0.00375334	0.00340806	0.0021566	0.0059477	5.43e-05	0.0055515	0.00942999	2.98e-05	0.00872098	0.000661032	0.000835156			0.00047771			0.000552676					0.00477622	0.00679123	0.00150485	0.000527598			0.000932696	0.00117973		0.000470531	0.00125926		0.00146156	0.0171272
Vagococcus humatus	0.000692832																0.000253428
Vagococcus lutrae	0.00446428			2.19e-05	8.09e-06		0.00518519	2.18e-05			0.00717635	0.0038235	1.9e-05				0.00294875			4.83e-06			0.000259593								8.77e-05					0.000418897	0.000953398											0.00322718
Vagococcus penaei						3.75e-06	2.84e-05									4.21e-06	3.43e-06					3.62e-06
Vagococcus salmoninarum		8.26e-06		1.38e-05		9.86e-06	7.39e-06				0.000594377					1.51e-05						5.89e-06
Vagococcus silagei	3.5e-05											1.18e-05				2.25e-05	2.81e-05																															2.23e-05
Vagococcus vulneris	5.78e-05	1.14e-05	1.42e-05				2.25e-05					6.69e-05	0.000203252							6.35e-05		1.31e-05																										3.65e-05
Vallitalea okinawensis																						3.43e-06
Variovorax beijingensis				3.72e-06
Veillonella caviae		5.86e-06		1.64e-06							3.51e-06						3.59e-06			1.62e-06	7.13e-06
Veillonella montpellierensis							2.54e-05
Veillonella ratti									1.01e-05
Veillonella seminalis	3.9e-06
Velocimicrobium porci	0.000118803	0.000134815	0.000213739	0.000152619	0.00114427	0.000256499	0.000113416	0.000447618	0.00045938	0.000308129	0.000245463	0.000139331	0.000207601	0.000279895	0.000283706	0.000102691	0.000132555	0.000138102	0.000295163	8.32e-05	0.000234139	0.00011247	0.000231882	0.00018867				0.000513497			6.24e-05			7.75e-05				0.000363663								0.000470512		6.56e-05	8.77e-05
Vescimonas coprocola		0.0191502	0.0188397	0.0302023	0.0305571	0.011911		0.0226441	0.0324179	0.0189715	0.0189324	0.0111264	0.0100724	0.0284409	0.0386244	0.00773246	0.0133324				0.0110955																												0.0147921
Vescimonas fastidiosa	0.0200514	0.00996048	0.00969682	0.0219132	0.00786073	0.00767369	0.0078465	0.0126714	0.011507	0.0126621	0.00818408	0.00645421		0.00829072	0.00625364		0.0029921			0.00438844	0.00862279	0.00651024
Vibrio hepatarius						9.75e-05							0.000122					4.92e-06	3.94e-05			3.69e-05																					0.000295284				9.37e-05
Vibrio hibernica			3.16e-05			6.8e-05						3.65e-05	9.9e-05									4.96e-05
Vibrio nereis																						8.35e-06
Vibrio ouci					3.33e-06		7.22e-07			8.24e-07	1.86e-06										1.34e-06			1.91e-05
Vibrio rumoiensis													0.00409744
Vibrio sinensis													1.82e-05																								0.00010535
Vibrio thalassae																						2.25e-06
Victivallis lenta					1.82e-05					3.25e-06	3.97e-06			4.56e-06			3.72e-06																																4.52e-05
Victivallis vadensis		4.37e-06				1.19e-05		5.73e-06						3.61e-06																																			1.91e-05
Virgibacillus indicus																																											9.75e-05
Virgibacillus salexigens															1.12e-06						9.73e-07		6.05e-06							1.56e-05
Viridibacillus arenosi						1.49e-05	0.000103397				4.97e-05	4.44e-05				2.36e-05	0.000273225																															2.31e-05
Viridibacillus arvi			1.99e-05														4.59e-05																															7.87e-05
Vitreoscilla sp. C1																	0.0269674
Vitreoscilla stercoraria																	0.000605558		0.000127782
Vogesella fluminis	2.34e-06
Waltera intestinalis	4.02e-05	7.31e-05	0.00014834	0.000198543	0.00121542	8.19e-05	2.04e-05	0.0001092	0.000224835	0.000339301	0.000167451	9.47e-05	9.84e-05	0.000424075	0.000145514	9.32e-05	6.46e-05	0.000132668	6.53e-05	5.48e-05	0.000233812	2.9e-05	6.75e-05	0.000152595	0.00065612	0.000314813		0.000305334	0.000477307	0.000209005	0.000118846		0.000456857	0.000210716	9.37e-05				5.23e-05	0.000538373		0.000478657	0.000173245	0.000163231		8.75e-05		1.55e-05	5.56e-05
Weissella beninensis		5.32e-06		1.92e-06			4.85e-05			6.47e-05			1.31e-05			1.45e-05	2.94e-05	6.33e-06		1.81e-05	1.16e-05																0.000246066					0.000458946							1.05e-05
Weissella bombi														0.00110228	0.000316069
Weissella ceti																		0.00246933
Weissella cibaria		1.71e-05	2.73e-05	7.52e-06			3.56e-05	9.53e-06	1.3e-05	1.39e-05				2.83e-05	9.69e-06		2.08e-05	3.63e-05		5.42e-05	0.000103445																					0.000268253			9.67e-05	0.00104346
Weissella confusa														0.00016555	9.73e-05					0.000114261
Weissella hellenica	0.000297467	0.000288471	1.22e-05	0.000901039		5.9e-06	0.000298531	0.000795035		0.00383415		0.000370402	0.000631403	0.00051014	0.000153124	1.84e-05	0.00105491	0.00203088	1.08e-05	0.000833663	0.00988185													0.00122046												0.00283465		0.00056142	0.00020807
Weissella jogaejeotgali	0.0423222	0.0310614	0.000116819	0.0287903		0.000101738	0.0476978	0.0297426	0.0210135	0.081898	5.13e-05	0.0675007	0.00498462	0.0293832	0.0135714	0.000121602	0.0238303	0.030238	0.000180716	0.1264	0.155256	0.0053943	0.000925175											0.00796852									0.00821091			0.00500359		0.00586389	0.00830531
Weissella kandleri													4.19e-06
Weissella koreensis							7.56e-05	0.000576979	0.000497318	0.00014848		3.01e-05					0.000163497			0.000103508	0.000473952										0.000334201		0.0005663									0.00114012
Weissella minor														0.000112294	1.2e-05		0.000264652	1.21e-05
Weissella paramesenteroides		0.00462021		0.0120695			0.00677763			0.0185114				0.0258499			0.00461481				0.0222982
Weissella thailandensis	0.00233768	0.00128301	0.000137772	0.0013523		0.000110662	0.00408772	0.002122	0.00126829	0.00691107	6.82e-05	0.00136019	0.000490257	0.00237763	0.0010139	1.43e-05	0.00152493	0.0019356	0.000111415	0.00853687	0.00893017	0.000367578	0.000450503	0.000165892							5.22e-05		0.000450976	0.00598133									0.00726281		0.00387019	0.000910502		0.00050694	0.000468629
Williamsia herbipolensis		1.58e-06
Williamwhitmania taraxaci	4e-05		1.4e-05		4.95e-05	7.77e-06	1.72e-05	5.05e-06	2.29e-05	4.68e-05	8.83e-06		2.96e-06		9.74e-06		4.54e-06	5.22e-06	1.42e-05		3.13e-05	2.73e-06						2.91e-05											4.71e-05										1.74e-05
Winogradskyella ouciana			1.02e-06
Wohlfahrtiimonas chitiniclastica		9.54e-05	2.78e-05	0.000104644	6.21e-05	0.00645967	0.000389351			1.69e-05	0.0029961	0.00289216	0.00327926	4.02e-05	0.000104554		0.000533931	3.39e-05	0.00256438	0.000394156		0.000908716								0.00384132					0.000727654	0.00121696	0.00233441		0.000120525					0.00185467	0.000222254		0.00115845	0.00332683
Wohlfahrtiimonas larvae		1.25e-05		1.17e-06		0.000434086	3.15e-05				0.000168475	0.000123542	0.000196144				6.78e-05		0.000179634	2.32e-05		7.01e-05								0.000378606									0.000172243					0.000355633			0.000262674	0.000186511
Wohlfahrtiimonas populi		0.000324508		6.36e-05		0.0234707	0.000826567			2.76e-06	0.00460179	0.00661158	0.0118615	8.64e-05	0.000245084		0.00216439	1.36e-05	0.00921459	0.00117349		0.00274774								0.0107164					3.85e-05	0.00214369	0.0182788					0.000665682		0.0104084			0.00160377	0.00552582
Wolbachia endosymbiont of Drosophila auraria													1.4e-06									1.24e-06
Wolbachia endosymbiont of Mansonella ozzardi														0.000121914	0.000104866			7.25e-05										5.54e-05														0.000544024
Xanthomarina gelatinilytica		3.01e-06
Xanthomonas citri
Xenophilus azovorans						1.57e-05					5.71e-05
Xinfangfangia humi							2.51e-05												4.91e-05
Xylanivirga thermophila		2.59e-06		7.1e-06			2.18e-06				1.24e-05				5.47e-06	6.44e-06	4.13e-06	3.57e-06	3.46e-06		7.65e-06
Yaniella halotolerans			8.62e-06
Yersinia enterocolitica													0.000253866
Yersinia vastinensis																						4.63e-06
Youngiibacter fragilis		1.35e-05		7.46e-06		0.000118307	1.24e-05					1.17e-05	4.51e-05				1.44e-05		3.31e-05			0.000132388								0.000143533																		1.88e-05
Youngiibacter multivorans		5.79e-06				5.04e-05						5.41e-06							6.91e-06	4.26e-06		1.12e-05								3.43e-05
Zoogloea oleivorans	6.74e-06
[Clostridium] dakarense	2.24e-05	5.27e-06	1.38e-05	8.02e-05			3.47e-06	1.21e-05	2.34e-05	1.73e-05		1.98e-05	9.29e-06	3.77e-06	2e-05	7.69e-06	3.75e-06	1.21e-05	2.61e-05	6.36e-06	2.81e-05		2.61e-05		9.84e-05																					0.000327941			4.5e-06
[Clostridium] fimetarium		3.16e-06			4.89e-06					8.1e-06	2.22e-05	1.3e-05	1.13e-05		2.04e-05	1.54e-05	8.38e-06		1.03e-05																													5.91e-06
[Clostridium] hylemonae	0.000122746	1.8e-05		2.69e-05	2.42e-05				1.27e-05	1.6e-05			6.33e-05	7.87e-05	6.81e-05				4.17e-05	3.02e-05	4.2e-05	2.15e-05
[Clostridium] innocuum																		0.0347583
[Clostridium] saccharogumia			5.11e-05			2.9e-05
[Clostridium] scindens	0.0805837						0.11376
[Eubacterium] cellulosolvens		1.94e-05	7.5e-06	2.53e-05		7.89e-06			0.000164006		3.29e-05		2.34e-05			5.13e-06				5.27e-05
[Eubacterium] rectale		0.0204206	0.077386	0.0161223		0.056821			0.136514	0.0964647	0.0622181	0.0216778		0.0258582	0.0889381	0.0893391	0.0199651			0.0107548
[Eubacterium] siraeum					0.0218914
[Eubacterium] tenue	8.5e-06		9.64e-06	2.8e-05
[Lactobacillus] timonensis		0.00143842	2.37e-05				2.29e-05		7.1e-05	0.000102395				9.14e-05	3.22e-05	2.93e-05	5.84e-05			1.86e-05	0.000121385	7.19e-06									0.000154105																		2.71e-05
[Pseudomonas] hibiscicola																						5.6e-06
[Ruminococcus] lactaris	0.000115824	7.17e-05	0.000112766	8.44e-05	0.000139353	6.75e-05	6.35e-05	5.99e-05	0.000183287	0.000110786	3e-05	6.68e-05	4.7e-05	0.000297647	0.000203815	5.14e-05	6.94e-05	2.6e-05	4.01e-05	7.71e-05	4.57e-05	3.59e-05	3.43e-05				0.000150403	0.000139579			2.68e-05							0.000176598							4.7e-05	0.000221574		5.81e-05	3.43e-05
[Ruminococcus] torques	0.0102085	0.0106249	0.00665257	0.0162024	0.0210791	7.75e-05	0.013485	0.0704407	0.0369627	0.0136293	0.013604	0.0276856	3.29e-05	0.028084	0.0350867	0.0145562	0.0153932	2.19e-05	1.93e-05	0.0154065	0.0100747	1.91e-05	3.92e-05				0.000262899	0.000112482			4.93e-05									0.000281095								0.0497502	3.86e-05
[truncated: 4 more columns]

## Sheet: Table_S10_top50_species_depth_l
species_name	MG_LVK_8_P2	MG_LVK_11_P2	MG_LVK_11_Grid4	MG_LVK_11_Grid23	MG_LVK_17_P2	MG_LVK_17_Grid23	MG_LVK_18_P2	MG_LVK_18_Grid23	MG_LVK_42_P2	MG_LVK_42_Grid23	MG_LVK_43_P2	MG_LVK_43_Grid23	MG_LVK_48_P2	MG_LVK_48_Grid4	MG_LVK_48_Grid23	MG_LVK_52_P2	MG_LVK_52_Grid23	MG_LVK_56_P2	MG_LVK_60_P2	MG_LVK_60_Grid4	MG_LVK_60_Grid23	MG_LVK_61_P2	MG_LVK_61_Grid23	MG_LVK_73_P2	MG_LVK_73_Grid23	MG_LVK_74_P2	MG_LVK_74_Grid23	MG_LVK_76_P2	MG_LVK_76_Grid23	MG_LVK_79_P2	MG_LVK_79_Grid23	MG_LVK_80_P2	MG_LVK_80_Grid23	MG_LVK_82_P2	MG_LVK_82_Grid23	MG_LVK_83_P2	MG_LVK_83_Grid4	MG_LVK_83_Grid23	MG_LVK_88_P2	MG_LVK_88_Grid23	MG_LVK_94_P2	MG_LVK_94_Grid23	MG_LVK_97_P2	MG_LVK_97_Grid23	MG_LVK_98_P2	MG_LVK_98_Grid23	MG_LVK_101_P2	MG_LVK_101_Grid23	MG_LVK_102_P2
Lactobacillus amylovorus	-0.307016	-0.29784	-0.68704	-0.639185	-0.0200648	-0.448847	-0.526586	-0.648097	0.0194877	-0.29667	-0.472989	-0.402913	-0.344908	-0.620176	-0.551039	-0.615777	-0.874795	-0.425722	0.133465	-0.542259	-0.663073	0.486142	-0.255286	-0.0452982	-0.13502	-0.144463	-0.291364	-0.0632353	-0.681126	-0.173708	-0.480996	0.126562	-0.42036	-0.0701369	-0.51786	0.0498171	-0.45694	-0.302839	0.468582	-0.240754	-0.412841	-0.164696	-0.944968	-0.148767	-0.299217	-0.622136	-0.164242	-0.638981	0.0944702
Jeotgalibaca porci	-0.882059	-0.678921	-1.3357		-1.22448		-1.77185		-1.82056		-3.44599		-1.64984			0.662237	-0.259618	-1.53081	-1.81953					-1.3827		-2.09171		0.185186	-0.497087	-0.629944		-0.954978		-2.00434		-2.04653			0.498323	-0.408196	-1.7557				-1.78901		-0.540833
Porphyromonadaceae bacterium		-0.49993			-0.564774		-0.705695		-0.51525		-0.503843		-0.00956179	-0.636013		-0.783293		-0.31533	-0.27638			-0.480651		-0.872868		-0.189865		-0.551296		-0.694692		-0.795571		-0.31021		-0.372182	-0.929744		-0.983201		-0.603155		-0.637949		-0.668063		-0.93303		-0.36171
Klebsiella quasipneumoniae	-1.21171	-0.275118			-0.233103		-1.27403		-0.375041		-0.242855		-0.805994	-2.43471	-2.75288	-0.81717		-0.923121	-0.128415			-0.468672		-1.2502		-0.605072		-0.513993		-0.811614		-0.500403		-0.586008		-0.543983			-0.557644		-0.653042		-0.821716		-0.77763		-1.19921		-0.807484
Limosilactobacillus reuteri	-1.21442	-0.621003	-1.22844	-0.855853	-0.744001	-0.516378	-1.13784	-0.260628	-0.963405	-0.838472	-1.46776	-3.02475	-1.57609	-2.04702	-2.90057	-1.21338	-1.1699	-1.51801	-0.629833	-1.32589	-1.28354	-0.577016	-1.10079	-2.22619	-2.99442	-1.09107	-1.10572	-0.979872	-0.976718	-1.21176	-1.29727	-1.22318	-1.22011	-1.00053	-0.796921	-1.08189	-1.23598	-0.836773	-1.33633		-1.71879	-2.76366	-1.9209		-1.3392	-1.13222	-1.19753	-1.2194	-0.892488
Aerococcus viridans	-1.43333	-0.767765			-1.67325				-1.52884		-1.72398					-0.691232		-1.45651						-1.37711		-2.28465		-1.62304		-0.290782		-1.5866		-0.591353		-0.861447			-0.557731		-1.64304		-0.905785				-0.148689	-0.944711	-1.04937
Lactobacillus johnsonii	-1.60498	-0.821749	-1.36031		-0.921334	-2.95167	-1.17821		-1.46386		-1.59786		-1.3118	-1.32814	-3.03224	-0.610905	-0.591863	-1.79187	-1.27451		-3.09626	-1.31695				-1.70011		-2.13455		-1.35363		-1.46512		-1.12663	-2.63491	-1.50056	-2.79501	-2.62113			-2.33413		-1.94745		-1.38524		-1.54152		-0.79389
Olsenella sp. GAM18	-1.40151	-1.41092			-1.04824		-1.74388		-1.29001		-1.15099		-2.08705			-1.25365		-1.29036	-1.34678			-0.744625		-1.04981		-1.34958		-1.21654		-1.00279		-1.2261		-0.965885		-1.08838			-1.0395		-1.83001				-1.17832		-0.87498		-1.32182
Streptococcus alactolyticus	-1.71735	-1.84431	-2.92737	-2.61149	-0.630381	-1.29123	-1.47806	-1.60011	-0.757597	-1.29948	-2.84038		-3.16132			-0.851964	-1.55296	-2.17445	-1.52723	-2.34303	-2.44441	-0.996837	-1.69468	-2.73263		-1.9409	-2.39215	-0.938279	-1.89056	-1.45659	-2.69508	-2.11928	-2.75723	-1.62801	-2.61944	-1.37689	-2.40117	-1.96352	-0.703597	-1.75905	-3.61344		-2.70921		-2.72006	-2.78613	-1.00592	-1.68096	-2.92609
Ruminococcus bovis		-1.03861			-1.0794		-1.46779		-1.08622		-0.986638		-0.993683	-1.12373		-1.30465		-1.29912	-1.20195			-0.81865		-1.16196		-1.19597		-1.50187		-1.20866		-1.62027		-1.65711		-0.998209			-1.77511		-1.7913				-1.27042		-1.76017		-1.52372
Bifidobacterium catenulatum	0.0963704																											-2.30403
Streptococcus hyointestinalis	-1.7754	-0.947077			-1.42242		-1.64197		-1.16531		-1.03468		-1.15205			-0.88679		-1.86603	-0.924742			-1.23638		-2.04179		-1.6143		-1.48827		-1.68255		-1.48103		-1.56725		-1.22909			-2.15892		-1.83178		-1.71601		-1.73913		-1.21035		-1.20538
Prevotella copri	-1.70845	-1.79165			-1.34308		-0.876712		-1.48018		-1.69508		-0.968268	-2.49597		-1.62324		-1.8998	-1.59887			-1.13222		-0.849892		-1.11963		-1.09868		-1.3651		-1.77555		-1.63282		-1.60161			-1.24382		-1.56533		-1.73113		-1.48081		-1.75364		-1.16673
Bacteroides coprosuis	-1.55686	-1.22072			-1.47616		-1.5704									-1.81573		-1.77304						-1.24099				-1.87507		-1.29787		-0.900003									-1.02772				-0.374831
Collinsella aerofaciens	-1.50322	-1.42698			-1.63025				-1.77067		-1.35123		-1.68789					-1.16655	-1.24296			-1.60199		-1.45641		-1.75877		-1.78396		-1.53042		-1.5013		-0.667955		-0.958822			-1.31524		-1.68662		-1.16062		-1.45181		-1.24703		-1.59748
Jeotgalibaca arthritidis	-1.63322	-1.94142			-2.06062						-2.12588					-0.885589		-1.78573										-1.00045		-0.331416		-1.64881							-1.76195		-1.54985						-0.9778
Turicibacter sp. H121	-1.88282	-1.94421	-0.993636		-1.47				-1.44943		-1.06781		-1.88144			-1.80662	-1.05764		-1.26249			-1.66361		-1.61356		-1.47818		-1.93553		-1.51614		-1.29634		-1.25312		-1.17702			-1.20776		-1.92809		-1.54559		-1.29193		-1.32406		-1.15172
Bifidobacterium pseudolongum	-1.53117	-1.78208			-0.501474		-1.46927				-0.732065							-1.83976				-2.25822		-1.46736				-1.86364		-0.877173				-1.63023		-1.90639			-1.79962				-0.773781
Amylolactobacillus amylophilus	-1.36825				-0.834804		-0.811014				-1.2946							-1.3144	-1.73089							-1.04918				-1.29384											-0.90066		-1.5257		-2.11763		-0.773812		-1.48859
Lactobacillus crispatus	-1.7217	-1.77181	-2.92537		-1.58402	-1.94694	-1.95893	-2.0822	-1.68005	-1.64927	-2.15669		-1.75327			-2.59871		-1.20798	-1.51983	-2.78728		-1.53777		-2.40159	-2.29439	-2.20515		-2.17843		-1.44159	-1.26919	-2.00804	-2.4982	-1.22158	-1.27406	-1.07689	-1.29694	-1.35332	-2.13071		-2.33469		-3.48781		-2.22189	-2.78541	-1.56666	-1.47056	-1.06481
Clostridium sp.		-1.89201			-1.74176				-1.38192		-2.19571		-0.626576	-0.636805	-0.93174	-1.89043		-2.31628	-1.35671			-1.72758				-1.5624		-1.82593		-1.93324		-2.28078		-2.31725		-2.14866			-2.16379		-1.93817				-1.85597		-1.86145		-2.03304
Weissella jogaejeotgali	-2.23181	-1.37343	-3.03378		-1.50778		-2.08064		-3.93249		-1.54075					-3.99252		-1.3215	-1.52662			-1.6775		-1.96309		-1.08673	-2.09862	-4.28988		-1.17069		-2.30237		-1.5319		-1.86737			-3.91506		-1.62287		-1.51945	-2.08561	-3.743		-0.898253		-0.80895
[Eubacterium] rectale					-1.68993				-1.11134		-1.79257					-1.24549						-0.864821		-1.64862		-1.01563		-1.20608		-1.66399				-1.5874		-1.05091			-1.04896		-1.69973						-1.9684
Aerococcus urinaeequi	-1.39898	-0.886273	-1.72856	-1.96307	-1.44964		-1.58258				-1.86332					-1.32083	-2.44417	-1.56372						-2.22604		-2.33689		-1.64605		-1.39575		-1.75263		-1.43217		-1.72758			-1.58557		-1.7982		-1.55575		-2.20049	-3.04423	-1.10218		-1.11668
Streptococcus gallolyticus	-3.69786	-1.37974			-2.10213		-3.09041		-2.19482	-2.75364						-2.64414	-2.94033	-2.94691	-2.78946			-2.31699				-3.87461		-2.21327		-2.67332		-3.56132		-0.51899		-0.580355			-2.68297								-1.69659	-2.14977	-1.8957
Faecalibacterium prausnitzii					-1.90367				-1.74776		-2.14438		-0.823182	-1.0967		-1.84871			-1.54123			-1.49528				-1.23678		-1.19164		-1.45519		-1.80301		-1.86132		-1.94911			-1.51006		-1.61866		-1.89518		-1.84515		-1.96159		-1.71555
Megasphaera elsdenii	-1.81805				-1.93337											-1.11394						-1.70609		-1.33655		-0.971976		-1.03227		-1.48564				-1.79803					-1.42958		-1.64068		-1.89845				-1.39468		-1.53831
Bacteroides fragilis		-4.09909							-4.74958		-3.98272		-3.82923					-4.33442														-4.88273											-0.209618
Limosilactobacillus mucosae	-1.35817	-1.47403			-1.76714		-1.89348		-1.4866		-1.92837					-1.87102		-2.06493	-1.57496			-1.36273		-1.73858		-1.64492		-1.3008		-1.70178		-1.65593		-1.37989		-1.49444			-1.26116		-1.86995				-1.85856		-1.88269		-1.54064
Limosilactobacillus pontis																			-0.729809			-1.0136				-1.02327													-0.951935										-1.00796
Latilactobacillus fuchuensis		-0.378047			-2.02839														-0.889023																								-1.91051				-2.03886
Coprococcus catus		-3.78971			-2.10977		-1.77954		-1.38679	-4.45223	-2.29444		-1.18685	-5.098		-2.12877		-2.48957	-1.48908	-5.00305		-1.2885		-1.82022		-1.16611		-1.76491		-2.01274	-4.0348	-1.90158		-2.01659		-1.40197	-4.84164		-1.26755		-1.96978		-4.54061		-2.2752		-2.07242		-2.22772
Dorea formicigenerans	-2.26756	-2.37307			-1.58529		-2.14613		-1.58043	-2.50372	-1.47767		-1.58175	-2.44927		-2.42677		-1.76164	-1.46632	-2.12055		-1.0851	-2.0468	-1.77348		-1.43922		-1.91696		-1.80794		-1.99511		-1.42137		-1.44331			-1.89005		-2.05993		-2.48364		-1.92533		-1.66836		-2.09251
Escherichia coli		-2.25151	-3.55093	-3.43064	-2.5417		-2.0693	-3.28227	-1.63359	-2.45255	-1.60816	-2.80301	-1.48755	-1.86567	-2.56642	-3.14888		-2.08845	-0.754142	-1.30392	-1.58546	-2.01338	-3.6643	-4.5784		-2.29477	-3.20341	-2.48426	-3.08011	-2.20309		-2.59656	-3.37108	-1.60476	-2.20927	-1.81033	-1.8094	-2.53916	-2.05232		-1.9108	-2.45967	-2.30094	-2.75934	-2.26695	-2.86254	-4.71897		-4.01189
Bacteroidales bacterium					-1.67695		-1.49957		-1.44003				-1.68057			-1.16835			-1.91604			-1.5811		-1.61568		-1.74753		-1.47098		-1.52927		-1.84914				-1.68441			-1.75739				-1.95067		-1.63289				-1.58589
[Ruminococcus] torques	-1.30321	-1.99104	-4.40671		-1.97368		-4.41341	-3.76317	-2.17701		-1.79042	-3.58021	-1.67615	-3.94892		-4.1107		-1.87015	-1.15218	-4.30715		-1.43224		-4.67572		-1.86553		-1.86633		-1.55775		-4.4828		-1.55154		-1.45486		-3.55115	-1.83695		-1.81267		-4.65956		-4.71444		-1.8123		-1.99677
Corynebacterium glutamicum		-1.95808			-1.49626						-1.55946							-1.10691								-2.21102				-1.97947		-1.90303		-2.35959		-2.01362					-2.36409				-1.33056		-1.6513		-2.0181
Catenibacterium sp. co_0103	-1.21463	-1.4337			-1.59507						-1.54261							-1.65351	-1.40805			-1.47305		-1.56294		-1.46674				-1.87524				-1.66713		-1.5812
Bacteroides uniformis		-4.45593																														-1.70174											-0.46733
Acinetobacter sp. F9																-0.951865												-0.727585
Vescimonas coprocola					-1.71783		-1.82997		-1.72493		-1.51996		-1.51489			-1.92405			-1.64504			-1.48922				-1.7219		-1.72279		-1.95365		-1.99687		-1.54606		-1.41314			-2.11168		-1.87509								-1.95485
Dorea longicatena	-1.9447	-2.39568	-2.59208	-2.17406	-1.89213		-2.5428		-1.75842	-2.68999	-1.61582	-2.26309	-1.87794	-2.65028	-1.50861	-1.94016	-2.67268	-2.12361	-1.64479	-2.56868	-2.04658	-1.44024	-2.41284	-2.19595		-1.85603		-2.02156		-2.01054		-2.76319		-2.06116		-1.81169	-2.87208	-3.90735	-2.09624		-2.3204		-2.94993		-2.76515	-4.61439	-2.15532		-2.72665
Streptococcus parauberis					-4.2993											-0.649243	-1.08874															-1.93361									-2.98038
Corynebacterium stationis	-2.26397				-2.04014				-1.31748		-2.06509							-1.59403												-1.36969		-1.89708		-1.95248		-1.61164			-1.64717						-2.11833		-1.45834
Ligilactobacillus salivarius	-2.03605	-1.34135	-1.7117	-3.03688	-2.38029				-4.98297		-2.3753		-1.56608	-1.98058	-3.7456	-2.56818		-1.36068	-1.46923	-3.78202		-2.11139				-1.90038				-2.25717	-3.4608	-2.21652	-3.30669	-2.1862	-2.24694	-2.32731	-3.37231	-3.46719	-4.81531		-2.25219						-2.40886	-3.14216	-2.05924
Kurthia huakuii	-2.44824				-3.48633	-3.24968	-3.86378		-4.92445				-5.08672			-3.01692	-4.09313	-3.26385				-4.28067		-2.64573	-3.63272	-2.54255	-3.12705	-1.98535	-2.35476	-1.16838	-1.65371	-2.66311	-2.78714	-2.93554		-4.49757			-1.61818	-2.98134	-1.91957	-1.75032	-4.45593		-2.2919	-1.85633	-2.01818	-2.0993	-2.68556
Phocea massiliensis	-4.75203				-1.88459		-2.12344	-2.01526	-2.56747		-1.70532	-1.38829	-1.89491	-1.76869	-2.85314	-4.6968			-4.41794		-2.4217	-1.99409	-1.81118	-2.34629		-2.26109	-2.51606	-4.52288		-1.75488	-3.10394			-2.05083	-2.71679	-2.01028	-2.44833	-3.09191	-4.85699		-5.05849	-1.61901		-1.85579	-4.1349		-4.33819		-4.82974
Bittarella massiliensis		-4.40012				-2.05107			-4.81248	-2.18901	-4.37572				-1.90672	-4.80967		-4.85078	-4.16304			-4.73993			-2.00452		-1.99687	-4.67162		-4.61083	-1.98682				-1.70297	-4.8962	-1.77567	-1.60851			-4.47237			-1.01119		-2.1627		-3.58969	-4.56703
Vagococcus fluvialis	-1.76631	-1.37926	-3.17978	-3.07823	-2.3367				-4.16685		-2.49844	-3.32084				-1.61022	-3.25753	-1.62486						-4.29158				-1.53389	-2.32092	-2.16839	-2.16805	-2.34584	-2.82251	-2.42558	-3.2777	-2.46749			-2.66623	-3.03026	-2.22565	-2.92822	-4.2652		-2.25559	-3.32741	-2.02549	-2.89988	-4.52578
Blautia obeum	-2.4467	-2.65454	-4.40561		-1.96712		-2.55907		-2.17183		-1.9271		-1.83685	-2.5577		-1.9709	-4.30103	-2.26387	-1.9439			-1.52546		-2.08803		-1.88126		-2.06435		-2.00857		-2.21585		-1.88371		-1.8094			-1.95261		-2.54589		-2.61353		-2.32351		-2.10012		-2.23053
[truncated: 4 more columns]

## Sheet: Table_S11_pathogenic_bacteria
species_name	LVK_8_P2	LVK_11_P2	LVK_11_Grid4	LVK_11_Grid23	LVK_17_P2	LVK_17_Grid23	LVK_18_P2	LVK_18_Grid23	LVK_42_P2	LVK_42_Grid23	LVK_43_P2	LVK_43_Grid23	LVK_48_P2	LVK_48_Grid4	LVK_48_Grid23	LVK_52_P2	LVK_52_Grid23	LVK_56_P2	LVK_60_P2	LVK_60_Grid4	LVK_60_Grid23	LVK_61_P2	LVK_61_Grid23	LVK_73_P2	LVK_73_Grid23	LVK_74_P2	LVK_74_Grid23	LVK_76_P2	LVK_76_Grid23	LVK_79_P2	LVK_79_Grid23	LVK_80_P2	LVK_80_Grid23	LVK_82_P2	LVK_82_Grid23	LVK_83_P2	LVK_83_Grid4	LVK_83_Grid23	LVK_88_P2	LVK_88_Grid23	LVK_94_P2	LVK_94_Grid23	LVK_97_P2	LVK_97_Grid23	LVK_98_P2	LVK_98_Grid23	LVK_101_P2	LVK_101_Grid23	LVK_102_P2
Escherichia coli		-2.25151	-3.55093	-3.43064	-2.5417		-2.0693	-3.28227	-1.63359	-2.45255	-1.60816	-2.80301	-1.48755	-1.86567	-2.56642	-3.14888		-2.08845	-0.754142	-1.30392	-1.58546	-2.01338	-3.6643	-4.58		-2.29477	-3.20341	-2.48426	-3.08011	-2.20309		-2.59656	-3.37108	-1.60476	-2.20927	-1.81033	-1.8094	-2.53916	-2.05232		-1.9108	-2.45967	-2.30094	-2.75934	-2.26695	-2.86254	-4.72		-4.01
Salmonella enterica	-4.48	-3.00261	-3.8252	-4.21	-4.26		-3.81341		-4.53		-2.03243	-2.47138	-2.44076	-2.57364	-2.90729	-4.58		-3.43935	-2.16319	-2.74349	-3.29556	-2.44588	-3.57724	-4.6				-4.29	-3.57302	-3.39987	-3.16895	-3.75564		-2.22661	-2.38193	-2.25452	-2.98098	-2.94185	-4.91		-2.76767	-2.22694	-3.17368	-3.00159	-3.78378	-2.72407	-4.9		-4.95
Shigella flexneri		-2.8176	-3.2658	-3.67629					-4.65				-1.78101	-2.20295	-1.90959	-2.96373		-4.82								-5		-3.88418				-3.31121							-4.52		-3.22589	-2.40602			-2.82246
Enterococcus faecium	-5	-2.90966		-3.21534	-3.15298		-2.51974	-2.61431			-3.44289		-3.17869			-2.83977		-3.34263		-3.80424		-3.34597		-2.87466				-2.67402		-2.65914		-3.42782	-2.7899	-3.10807		-4.3			-2.65411	-3.07473	-3.43442		-3.28506	-2.59781	-3.21255		-3.06788	-4.08	-3.27574
Lawsonia intracellularis	-2.5849				-2.97915		-3.78203				-1.88948													-2.56735				-2.27042		-2.74701				-2.8106
Staphylococcus aureus	-4.14	-2.86542	-2.50225	-2.4695	-3.69295				-4.35	-3.43879	-3.01366		-4.02		-3.69201	-2.80165	-3.50706	-4.58		-3.84406		-5.09				-4.91		-3.67265	-2.64846	-4.25		-3.99821	-3.0568	-4.66	-3.31778	-4.23		-3.19512	-4.74		-3.82122	-2.76901	-4.1	-2.63648	-4.12	-2.54747	-4.55	-3.50039	-4.17
Klebsiella pneumoniae	-4.87	-3.13517		-4.29	-4.94		-4.65		-3.58467	-2.18124	-4.22	-3.23133	-2.75089	-3.41173		-4.59	-3.99604	-4.79	-2.57283	-2.82718	-3.34575					-5.02		-4.76				-4.6	-3.08586	-2.96186	-2.58529	-3.05042	-3.43683	-3.3297	-5		-5.1	-3.33375	-3.40353	-3.39003	-4.46	-3.71314	-5.3		-4.86
Klebsiella oxytoca																-4.19					-3.55752													-2.11407	-2.32474	-2.32065	-2.83598					-2.96828
Acinetobacter baumannii	-3.90901	-4.78	-4.01		-4.36						-4.76					-3.56567	-3.00819	-4.18				-4.7		-3.62513		-5.22		-3.57028	-2.601	-3.04538	-3.29345	-3.88417	-3.01157	-4.66		-4.28	-3.56282		-4.55		-3.94509	-2.51651	-4.38		-3.80092	-3.1454	-3.88303
Listeria monocytogenes	-4.08		-4.07		-4.66											-3.49727	-3.55393	-4.35						-4.16				-3.24584	-2.97753			-4.52		-4.31		-4.24			-2.54412	-2.75331	-3.28873	-2.98136			-4.49		-3.19786	-3.00718	-4.3
Actinobacillus pleuropneumoniae		-3.962			-3.85254		-4.99					-2.60626				-4.42		-4.67						-4.34		-4.89										-5.07									-4.41		-4.87
Streptococcus suis					-4.71											-3.45704	-2.52594					-5.05										-4.84		-4.66		-4.56													-3.85919
Campylobacter jejuni					-3.88333		-4.46		-3.50066													-4.17				-4.97						-3.84265		-3.72834		-3.76314	-3.69819								-4.09				-2.95152
Pseudomonas aeruginosa			-3.50185							-3.36309																								-4.85	-3.2211										-3.96014
Streptococcus pyogenes									-4.37	-3.50676
Clostridioides difficile											-5.63																							-4.01		-4.66
Clostridium tetani	-4.9																									-5.08
Enterobacter cloacae																																				-4.87
Corynebacterium diphtheriae																-5.24
[truncated: 4 more columns]

## Sheet: Table_S12
species_name	Blastocystis sp. (0.1)	Enterocytozoon bieneusi (0.1)	Enterocytozoon bieneusi (0.5)	Cryptosporidium spp.
DTU_2024_1036880_100_MG_LVK_11_SE.mapstat	-2.58601	-2.46146	-2.04914
DTU_2024_1036881_100_MG_LVK_17_SE.mapstat		-2.28743	-1.47754
DTU_2024_1036882_100_MG_LVK_42_SE.mapstat		-2.02264	-1.35476
DTU_2024_1036883_100_MG_LVK_43_SE.mapstat	-2.62492	-2.39208	-1.42044
DTU_2024_1036884_100_MG_LVK_48_SE.mapstat	-1.78578	-1.9419	-1.31075
DTU_2024_1036885_100_MG_LVK_52_SE.mapstat		-2.1708	-1.72462
DTU_2024_1036886_100_MG_LVK_56_SE.mapstat		-3.12607	-1.87878
DTU_2024_1036887_100_MG_LVK_60_SE.mapstat	-2.2052	-1.74234	-1.35502
DTU_2024_1036888_100_MG_LVK_61_SE.mapstat		-2.01398	-1.34247
DTU_2024_1036889_100_MG_LVK_74_SE.mapstat		-3.65785	-3.11749
DTU_2024_1036890_100_MG_LVK_76_SE.mapstat		-2.3869	-1.49946
DTU_2024_1036891_100_MG_LVK_79_SE.mapstat		-2.12996	-1.77146
DTU_2024_1036892_100_MG_LVK_80_SE.mapstat		-2.14931	-1.81824
DTU_2024_1036893_100_MG_LVK_82_SE.mapstat		-2.09658	-1.28361
DTU_2024_1036894_100_MG_LVK_83_SE.mapstat		-2.23221	-1.47873
DTU_2024_1036895_100_MG_LVK_88_SE.mapstat		-2.04361	-1.67338
DTU_2024_1036896_100_MG_LVK_94_SE.mapstat		-2.17265	-1.87327
DTU_2024_1036897_100_MG_LVK_97_SE.mapstat		-2.79137	-1.9149
DTU_2024_1036898_100_MG_LVK_98_SE.mapstat		-2.29793	-1.73053
DTU_2024_1036899_100_MG_LVK_101_SE.mapstat		-2.22053	-1.23099
DTU_2024_1036900_100_MG_LVK_102_SE.mapstat		-3.37228	-1.87277
DTU_2024_1036901_100_MG_LVK_103_SE.mapstat		-2.24904	-1.76124
DTU_2024_1036902_100_MG_ID_262_W_F146_6_SE.mapstat		-1.22216	-0.839327
DTU_2024_1036903_100_MG_ID_262_W_F146_11_SE.mapstat		-2.35797	-1.79919
DTU_2024_1036904_100_MG_ID_1188_W_F139_2_SE.mapstat		-2.6844	-1.73972
DTU_2024_1036905_100_MG_ID_1188_W_F139_10_SE.mapstat		-1.2642	-0.866058
DTU_2024_1036906_100_MG_ID_3066_W_F150_12_SE.mapstat		-1.82722	-1.33356
DTU_2024_1036907_100_MG_ID_3066_W_F150_21_SE.mapstat		-1.69814	-1.23199
DTU_2025_1036880_101_MG_LVK_11.mapstat		-2.48596	-1.76257
DTU_2025_1036880_102_MG_LVK_11.mapstat		-2.12837	-1.18867
DTU_2025_1036881_101_MG_LVK_17.mapstat		-1.50328
DTU_2025_1036882_101_MG_LVK_42.mapstat		-1.45859
DTU_2025_1036883_101_MG_LVK_43.mapstat		-1.77033	-1.00316
DTU_2025_1036884_101_MG_LVK_48.mapstat		-2.77317
DTU_2025_1036884_102_MG_LVK_48.mapstat
DTU_2025_1036885_101_MG_LVK_52.mapstat		-1.74626	-0.859083
DTU_2025_1036887_101_MG_LVK_60.mapstat
DTU_2025_1036887_102_MG_LVK_60.mapstat			-0.475608
DTU_2025_1036888_101_MG_LVK_61.mapstat		-1.83045	-1.5537
DTU_2025_1036889_101_MG_LVK_74.mapstat		-3.17685
DTU_2025_1036890_101_MG_LVK_76.mapstat		-0.917316	-0.626472
DTU_2025_1036891_101_MG_LVK_79.mapstat		-1.43114	-0.84574
DTU_2025_1036892_101_MG_LVK_80.mapstat		-1.41869
DTU_2025_1036893_101_MG_LVK_82.mapstat		-1.01025	-1.95512
DTU_2025_1036894_101_MG_LVK_83.mapstat		-1.77895
DTU_2025_1036894_102_MG_LVK_83.mapstat		-1.28005	-0.161781
DTU_2025_1036895_101_MG_LVK_88.mapstat		-1.16514	-0.673397
DTU_2025_1036896_101_MG_LVK_94.mapstat		-1.62949	-0.332359
DTU_2025_1036897_101_MG_LVK_97.mapstat		-1.68282
DTU_2025_1036898_101_MG_LVK_98.mapstat
DTU_2025_1036899_101_MG_LVK_101.mapstat
DTU_2025_1036900_101_MG_LVK_102.mapstat		-2.99759
DTU_2025_1036901_101_MG_LVK_103.mapstat			-1.73737
DTU_2025_1037643_100_MG_LVK_8.mapstat		-1.99055	-2.0006
DTU_2025_1037644_100_MG_LVK_18.mapstat		-1.91004
DTU_2025_1037644_101_MG_LVK_18.mapstat		-2.26323	-1.35759
DTU_2025_1037645_100_MG_LVK_73.mapstat		-1.72053
DTU_2025_1037645_101_MG_LVK_73.mapstat		-2.31822	-2.13825
DTU_2025_1037646_100_MG_LVK_107.mapstat		-3.02596

## Sheet: Table_S13_ResFinder_SI
gene	DTU_2014_1035953_100_SI_LVK_17.mapstat	DTU_2024_1035952_100_SI_LVK_11.mapstat	DTU_2024_1035954_100_SI_LVK_43.mapstat	DTU_2024_1035955_100_SI_LVK_48.mapstat	DTU_2024_1035956_100_SI_LVK_60.mapstat	DTU_2024_1035957_100_SI_LVK_61.mapstat	DTU_2024_1035958_100_SI_LVK_74.mapstat	DTU_2024_1035959_100_SI_LVK_80.mapstat	DTU_2024_1035960_100_SI_LVK_83.mapstat	DTU_2024_1035961_100_SI_LVK_94.mapstat	DTU_2024_1035962_100_SI_LVK_97.mapstat	DTU_2024_1035963_100_SI_LVK_98.mapstat	DTU_2024_1035964_100_SI_LVK_102.mapstat	DTU_2024_1035965_100_SI_LVK_103.mapstat	DTU_2024_1035966_100_SI_DTU_42C.mapstat	DTU_2024_1035967_100_SI_DTU_48A.mapstat	DTU_2024_1035968_100_SI_DTU_52A.mapstat	DTU_2024_1035969_100_SI_DTU_56B.mapstat	DTU_2024_1035970_100_SI_DTU_60C.mapstat	DTU_2024_1035971_100_SI_DTU_76C.mapstat	DTU_2024_1035973_100_SI_DTU_80C.mapstat	DTU_2024_1035974_100_SI_DTU_82A.mapstat	DTU_2024_1035975_100_SI_DTU_83A.mapstat	DTU_2024_1035978_100_SI_CP_10C.mapstat	DTU_2024_1035979_100_SI_CP_11D.mapstat	DTU_2024_1035980_100_SI_CP_12D.mapstat	DTU_2024_1035982_100_SI_CP_15B.mapstat	DTU_2024_1035983_100_SI_CP_26D.mapstat	DTU_2024_1035984_100_SI_CP_27B.mapstat	DTU_2024_1035985_100_SI_CP_32A.mapstat	DTU_2024_1035986_100_SI_CP_43C.mapstat	DTU_2024_1035988_100_SI_CP_50D.mapstat	DTU_2024_1035989_100_SI_CP_52B.mapstat	DTU_2024_1035990_100_SI_CP_59B.mapstat	DTU_2024_1035991_100_SI_CP_60B.mapstat	DTU_2024_1035992_100_SI_CP_61B.mapstat	DTU_2024_1035993_100_SI_CP_68B.mapstat	DTU_2024_1035996_100_SI_CP_93B.mapstat	DTU_2024_1035997_100_SI_CP_94C.mapstat	DTU_2024_1035998_100_SI_CP_97A.mapstat	DTU_2024_1035999_100_SI_CP_100B.mapstat	DTU_2024_1036000_100_SI_CP_102A.mapstat
aac(3)-IId				1.16868
aac(3)-IV			1.02073
aadA1				1.24534	1.74661	1.6537	1.33861	1.75923	1.44618	0.974423	2.14812				1.45823		-0.509774	-0.659602	1.77793	2.29026	1.28939	1.51974	1.55785
aadA12										1.62439																																-0.796869
aadA17				1.13434										-0.501505		1.79153
aadA2				0.462418											1.38702
aadA22			1.42821
aadA23																	-0.508659	-0.468153
aadA24																	1.58213	1.57021
aadA4													1.94018
aadA7																1.36097
ant(3'')-Ia			1.10238	0.913041			1.08115			1.37702				-0.716502		1.68042	1.14872	1.16823
ant(6)-Ia																									2.05467					1.59056			-0.797147				2.04909
ant(6)-Ib																									1.64913			1.80012	1.70907		1.82195		1.8241	2.0297	1.91228				1.81076	2.11069		1.66048
aph(3'')-Ib		2.06959	1.09161			2.03132		1.46589		1.27827							1.14991	1.09527			1.34232
aph(3')-III																									2.01688								-0.860792
aph(3')-Ia	2.17366	2.07349	1.0956	1.11697		1.6983		1.43839	1.50092					-0.487028	1.30357	1.35898					1.35779	1.63365	1.56195
aph(4)-Ia			1.14344
aph(6)-Id		2.08345	1.11321			2.05462		1.48799		1.28216							1.13001	1.08783			1.33902
blaTEM-1B	2.07432	1.63738	1.49723	1.09786		2.09685			1.45575	1.31519				-0.462922		1.8295	1.19467	1.07916			1.49033	1.5614	1.61231
cml				-0.198202						0.16999					0.489725
cmlA1				0.836407						1.17728					1.68487
dfrA1						1.4338		1.56504			1.97981						0.876391	0.83596			1.13535
dfrA12				0.921351											1.52633
dfrA5									1.27007													1.42685	1.32759
erm(B)		1.56334			2.14006														2.08431											1.94743						2.23102	1.93832
floR	2.24324			1.28767
lnu(C)																														1.41399
lnu(F)				1.15524										-0.484399		1.81231
lnu(G)			1.41806
lnu(P)																										2.19309						2.13126
mph(A)		1.4049			2.28213														2.20601
mph(B)							1.48777	1.45405									1.22283	1.16263			1.46047
qnrS1																1.73376					1.42916
sul1						1.68641	1.41503	1.79697		1.34071	2.16873		1.98097			1.40281	1.14932	1.04201			1.36489
sul2		1.26983		1.12423		2.05063			1.42369								1.17573	1.06595				1.61357	1.51405
sul3				1.09325						1.3657				-0.499873	1.70372
tet(44)																									1.94262			2.09756	1.99685		2.10836		2.10571	2.29461	2.18099				2.11785	2.36961		1.93186
tet(A)				1.24087		1.817			1.64157	1.46026					1.74299		1.34103	1.28665			1.54433	1.74743	1.70636
tet(B)		1.42144	1.29697				1.60606					2.27438	2.16196			1.56984
tet(M)				1.37749
tetA(P)																								2.42429	1.77537	2.19392	2.56196	1.94306	1.99443	2.0792	2.04484	2.62497	1.98577	2.16505	2.065	2.4769	2.66494	1.97809	1.99731	2.18812	2.51667	1.89308
tetB(P)																								2.60133		2.34197	2.70151										2.81077	2.44566

## Sheet: Table_S13_ResFinder_MG
gene	MG_LVK_11_P2	MG_LVK_17_P2	MG_LVK_42_P2	MG_LVK_43_P2	MG_LVK_48_P2	MG_LVK_52_P2	MG_LVK_56_P2	MG_LVK_60_P2	MG_LVK_61_P2	MG_LVK_74_P2	MG_LVK_76_P2	MG_LVK_79_P2	MG_LVK_80_P2	MG_LVK_82_P2	MG_LVK_83_P2	MG_LVK_88_P2	MG_LVK_94_P2	MG_LVK_97_P2	MG_LVK_98_P2	MG_LVK_101_P2	MG_LVK_102_P2	MG_LVK_103_P2	MG_LVK_11_Grid4	MG_LVK_11_Grid23	MG_LVK_17_Grid23	MG_LVK_42_Grid23	MG_LVK_43_Grid23	MG_LVK_48_Grid4	MG_LVK_48_Grid23	MG_LVK_52_Grid23	MG_LVK_60_Grid4	MG_LVK_60_Grid23	MG_LVK_61_Grid23	MG_LVK_74_Grid23	MG_LVK_76_Grid23	MG_LVK_79_Grid23	MG_LVK_80_Grid23	MG_LVK_82_Grid23	MG_LVK_83_Grid4	MG_LVK_83_Grid23	MG_LVK_88_Grid23	MG_LVK_94_Grid23	MG_LVK_97_Grid23	MG_LVK_98_Grid23	MG_LVK_101_Grid23	MG_LVK_102_Grid23	MG_LVK_103_Grid23	MG_LVK_8_P2	MG_LVK_18_P2
Cfr(D)	-2.2192																	-1.47529	-1.92728																								-1.58888	-1.93659
Cfr(E)	-0.493045	-0.120128	0.168122	0.292061	0.0770967	-0.725619	-1.7568	-0.129139	0.200358	-0.475101	-0.597429	-0.0312923	0.324682	0.366315	0.258068	-0.461554	-0.953588	-0.622851	-0.169279	-0.365132	-0.0870439	-0.601581	-1.48664	-1.40464		-1.16001	-0.984798	-0.673089			-0.98975		-1.06594		-1.57881		-1.11649	-0.899104	-0.635115	-0.8785			-1.60454	-1.3652	-1.70491	-1.14417		-1.64625	-0.601794
VanEXY																				-1.522
VanG2XY	-1.51509	-1.86718	-1.43525	-1.92634	-1.37774	-1.56219	-1.65319		-1.12777	-1.3364	-1.96763		-1.38915				-1.45257	-1.48933		-1.92622	-1.55616					-1.2206
VanGXY	-2.06015	-1.38411		-1.42572	-1.34325		-1.95734				-1.76172			-1.6164	-1.53938	-1.91855	-1.67083											-1.21048
VanH						-2.04765						-2.20415
VanHAX												-1.10931																																				-1.69215
VanHBX					-1.67421	-1.61103			-1.63884		-1.82136	-1.77919	-1.81834								-1.62134
VanHDX															-1.81092
VanX												-2.18961
aac(3)-IIa				-2.25187		-0.41563				-1.88923	-1.10316	-2.25598	-1.87826	-2.23996								-1.18475								-1.94662
aac(3)-IId	-1.20767				-0.0799343			-1.68181							-2.26113													-1.04606
aac(3)-IIe	-1.83808				-1.3205
aac(3)-IV	-2.35867	-0.411584		-0.0448237	-2.2283	-0.0690988	-2.37192	-0.741792			-1.22996	-1.82294	-2.09455	-0.630176	-1.24504		-1.45145	-2.16077	0.0716036			-0.292311					-1.3421			-1.51357	-1.82923				-1.7601									-0.984478					-1.89558
aac(6')-31											-2.51749
aac(6')-IIa		-2.48027				-1.88951	-1.77127				-2.01291		-1.65649	-2.43118				-2.30589	-1.86716			-1.92115																										-1.25723
aac(6')-Ian							-2.45638
aac(6')-Ib-Hangzhou	-2.2315			-2.46432		0.0475404	-1.89731	-2.38637			-1.18217		-1.46556				-1.04942		-0.537304																-1.93479									-1.77247
aac(6')-Ib3						-2.0407																-1.35899
aac(6')-Ii														-2.13329	-2.44168			-2.0318
aac(6')-Iid			-2.30388			-2.54709	-2.47814								-2.43774
aac(6')-Im	-1.52421			-1.75387	-1.21172		-0.781773	-1.88684	-1.74751	-2.37338	-2.20252			-1.74653	-1.7523	-2.42407	-1.85493	-1.29534		-2.44732	-1.59122	-2.17141
aac(6')-aph(2'')	-0.986664	-2.06542		-2.02536		0.143051	-0.882682	-1.45815		-1.3915	-1.10114			-0.608574	-1.72155		-1.73533		-2.06491			-1.221						-1.6494		-0.486542					-1.49129									-1.34327				-1.42216
aadA1	-0.799479	-0.688867			-1.1566	-0.0074093	-1.83832	0.65798	-1.51031		-0.278443	-0.672517	-0.280636	0.0474896	-0.147122	-0.971765	-0.692337	-1.51468	-0.500972	-1.84124	-1.32074	-0.456791	-2.07522	-1.89201					-1.56001	-1.38198	-0.897191						-1.71147		-1.56434					-2.06603				-0.503134	-1.73776
aadA11	-1.87436	-2.32506				-1.76933							-1.87961		-2.25542	-2.19827	-1.03578	-1.6759	-1.85902	-1.59832		-1.83506																										-1.40723
aadA12	-1.57333			-1.58512			-2.31636										-1.03297						-2.04526
aadA13		-1.84466		-1.76784								-2.29011	-1.56826	-1.97271	-2.2886		-2.28387		-1.77371																													-2.20625
aadA14	-1.67065	-1.09191		-1.37091		0.127592	-1.38839		-2.11375		-0.0100094	-1.16464	-0.640954	-1.65459	-1.45387	-0.896573	-0.692852		-0.711154	-1.5313		-0.585958	-1.73897							-1.50692					-1.62139									-2.07826			-1.57889	-0.760665	-2.041
aadA15															-2.29645
aadA17	-1.90112			-1.84877	0.0295453									-0.298838	-0.658257					-2.27773								-1.16669	-1.67113											-1.68526
aadA1b													-2.3703
aadA2	-0.642343	-1.1258		-0.961611			-1.28927	-2.26207				-1.81463		-1.03509		-1.79482	-1.96843	-1.52865			-2.21875	-0.778511		-1.8152				-1.24923																-2.06658				-1.30698
aadA21				-2.28629
aadA22				-1.70744																							-1.63428
aadA23					-2.19474
aadA24	-2.08854	-2.15671	-1.12026	0.00871246	-0.142305	-0.399791	-0.474155			-0.944629	-1.82558	-1.30574	-1.03643	-1.84934	-1.77796	-2.23188	-2.04084		-1.415			-1.29532						-0.707244																				-0.918351
aadA2b					-0.303991	-1.69638					-2.03981		-2.06867		-1.28241				-1.04448	-1.52095																													-2.04321
aadA4																					-2.0054
aadA5	-1.75107					-1.95239							-2.33191					-0.360082			-2.21373	-1.90247																										-2.21172
aadA7					-1.44735			-1.8909	-1.1536			-2.28414		-1.42327	-1.29969
aadA8							-2.31801
aadA9	-0.734027	-2.30158		-1.42255		-1.60063	-0.939684					-1.8072	-1.73426	-2.25171	-1.95749	-1.6049		-2.17208		-1.33065		-0.961613		-1.53214
aadD	0.905749	-0.0957636	-1.27201	0.729592	-0.527301	0.527176	-0.920619	-0.336275	-1.35854	-0.234729	-0.648506	-1.20762	0.116827	0.383187	-0.0674726	-1.15529	0.47188	0.925972	-0.611572	-0.427375	0.01302	-0.287324	0.96194	0.449705	-1.34407		-0.192478	-1.62508	-1.22988	-0.25601	-0.951719	-1.61277	-1.66843	-0.901633			-0.0962901	-0.665903	-1.2882	-1.40098		0.0115158	0.485182	-0.786555		-1.34568	-0.854195	-1.09285	-0.122284
ant(2'')-Ia						-1.61646					-1.61232		-2.19202					-2.01993	-2.48273			-1.81734								-2.15114
ant(3'')-Ia	-0.853222	-1.34405		0.0503367	-0.209759	-1.59153	-1.09492	-1.26303	-1.24116	-1.96398		-2.2064	-1.34976	-0.386017	-0.668591	-2.14837	-1.15113		-1.44628		-2.13482	-1.02844						-1.02487										-1.66725						-1.98068				-1.31215
ant(6)-Ia	0.596137	0.920603	0.5608	0.836409	0.736773	0.21901	0.296235	0.879772	1.27839	0.766466	0.818219	0.748855	-0.0194098	0.809622	0.820024	0.86181	0.182833	0.0751788	0.231128	0.515041	0.910276	0.623401	-0.122144	-0.553933	-0.669786	-0.880802	-0.648101	0.0142169	-0.4442	-0.844727	-0.286231	-0.638551	-0.336321	-0.683777	-1.28204	-1.05478	-1.51094	-1.04438	-0.423638	-0.718267	-1.12752	-1.23552	-1.0136	-1.02581	-1.00914	-0.473764	-0.958065	0.270169	0.364799
ant(6)-Ib	-0.219873	-0.0839338	-0.390974	-0.0251969	-0.0850899	-0.117133	-0.382971	-0.174832	0.117861	-0.0494966	-0.27584	-0.423002	-0.388469	-0.526994	-0.331879	-0.745502	-0.45009	-1.35996	-0.545285	-0.745017	-0.752708	-0.841421	-0.656342	-1.27718		-1.22301	-1.56554	-0.263461	-1.32279	-1.06072	-1.01366	-1.26033	-1.04453	-1.17543		-1.61641	-1.3623	-1.33794	-1.03137	-1.34951		-1.71095		-1.40401	-1.3084			-1.47634	-0.934589
ant(9)-Ia	0.092472	0.552574	-1.05888	0.444532	-2.21526	-0.0602144	-1.59811	-0.294258	-1.31525	-1.23988	-0.38645	-0.872247	-0.591393	0.698677	0.341429	-0.895281	-0.907823	-0.557272	-0.589927	-0.117101	0.317592	-0.0983741	0.252435	-0.397527	-0.0475722	-1.59861	-0.194801		-1.67954	-0.602363			-1.65605	-1.30188	-1.75731	-1.17749	-0.850734	0.185298	-0.0494401	-0.140615	-1.5777	-0.847587	-0.746333	-0.451284	-0.438452	-0.729415	-0.547477	-0.256922	0.00487579
aph(2'')-Ib	-1.60829	-2.33842		-1.47118	-1.1832		-0.604982	-1.66257	-2.05355		-2.28033			-1.3589	-1.8581		-1.7556	-1.18035		-2.22434	-1.9786	-2.24914
aph(2'')-Ic	-1.25712		-2.07919			0.10619	-1.68152		-2.04311		-1.79295	-2.22575	-2.33521	-1.26314	-2.22078	-1.70158				-1.15406	-1.4678	-0.72757		-1.82678						-0.536213					-1.68382												-1.03395
aph(2'')-If	-1.53596			-1.92706	-1.2164	-2.33587	-1.18653			-1.45889	-2.28153	-2.24304	-2.27591	-0.678258	-1.1674		-2.23466				-1.86769	-1.95395						-1.85527
aph(3'')-Ib	-0.219419	-0.508982	-1.73233	-0.0468006	-0.648294	0.389667	-0.261146	-0.0297591		-1.08538	0.501162	-0.203213	-0.647029	0.031387	-0.329404	-0.386377	0.0715959	-1.21164	0.329457	-0.666389	-1.72511	0.0379625	-1.32109	-1.68571			-1.62938	-1.78317		-1.13285	-1.46614				-1.04573			-1.74859	-1.45202			-1.73972		-0.858258			-1.87283	-0.533007	-1.82773
aph(3')-III	1.11953	1.19588	0.541944	1.16682	1.20132	0.936174	0.310052	0.86822	1.03412	0.994674	0.245608	1.04858	0.69922	1.01988	0.970456	0.292936	0.626622		0.100749	0.264939	0.137923	0.443259	0.713228	-0.000833344	-0.388385	-0.373791	0.14102	0.812987	0.0808223	-0.120965	0.20485	-0.180523	0.0389635	-0.114482		-0.27526	-0.121367	-0.274611	0.293219	0.00724196		-0.235588	0.328948	-0.92697	-1.34152	-1.43025	-0.802341	-0.246008	0.892515
aph(3')-IIIa		-2.02184																0.928256
aph(3')-IIa	-2.34984	-2.32836		-1.9806			-2.32579								-2.19314
aph(3')-Ia	-0.469042	-0.669607	-1.43279	0.509363	0.0928531	0.293829	-1.28958	-1.01799		-1.09761	-0.746398	-1.32454	-0.408628	0.633503	0.345322	-1.67848	0.0304612	-0.036236	-0.0394148	-1.70447		-0.366113	-1.23743	-1.71701			-1.12992	-0.785923	-1.65424	-1.14512					-1.73933			-0.532641	-0.620379	-0.973875			-1.42165	-1.28018			-1.86585	-1.26457	-1.22643
aph(3')-Ib	-1.86139					-1.14353													-1.64672
aph(3')-Id	-2.33958																			-2.30711		-1.71457
aph(3')-VI															-1.48184
aph(3')-VIII							-2.02448
aph(3')-VIa	-2.35978	-1.85457		-1.51257		-1.35396		-2.20129		-1.72926		-1.99735	-0.161075	-1.71593			-0.316222		-0.617917			-0.848842															-1.01748							-1.13532			-1.59427
aph(3')-VIb												-2.29727
aph(4)-Ia		-0.420188		0.0915374	-2.07569	0.0735013		-0.573112			-1.11152	-1.87577	-1.61743	-0.567995	-1.20531		-1.37325	-1.73704	-0.129008		-1.82714	-0.180008					-1.3026			-1.32109					-1.63923									-1.4596				-2.16136
aph(6)-Ic	-2.06071	-2.32451		-1.81212											-2.27762
aph(6)-Id	-0.191047	-0.480256	-2.12125	-0.0132276	-0.927299	0.399451	-0.268273	-0.0308995	-2.08752	-1.06901	0.512361	-0.22466	-0.641468	0.0209703	-0.315423	-0.37674	0.0968902	-1.36924	0.331185	-0.619486	-1.49492	0.026978	-1.56981	-1.77256			-1.61135	-1.56926		-0.944904	-1.47199				-1.02826			-1.73106	-1.47314			-1.72223		-0.817233			-1.85586	-0.495091	-2.01947
blaACI-1	-1.84112	-1.11004	-1.03252		-0.857872	-0.833839	-2.28257	-1.85816	-1.01969	-0.356692	-0.438906	-0.805927	-1.70754	-1.45152	-1.36118	-0.735996	-1.36801		-1.18833	-0.926388	-1.35559	-1.22451						-1.64282																			-1.84456	-1.634	-1.40294
blaBKC-1							-2.26417
blaCARB-16	-1.44484		-1.78434		-1.83253	0.115135				-1.36753	-0.209883	-1.10305	-1.97681			-0.832477			-1.94353			-0.380198								-1.03441					-1.704									-2.01245				-0.621515
blaCARB-2																			-2.27801
blaCARB-49				-2.23294
blaCARB-5							-0.681423										-2.23806			-2.25227
blaCARB-8		-1.22902													-1.9392
blaCMY-104						-2.22751
blaCMY-80														-2.11553
blaDHA-16						-2.06317					-1.64819
blaDHA-23											-2.17742
blaEBR-1				-2.33896		-1.53555	-1.91831	-2.24698			-2.38861	-0.604656	-1.31402	-2.32728		-2.27622	-1.86042	-2.20356	-0.551331	-1.6693		-1.58952																						-1.63944	-1.86959			-2.00431
blaMUS-1						-2.11223							-2.36082
blaOXA-1	-1.75856			-2.02235		0.269823	-1.52834	-2.17748			-1.04799		-1.18208	-2.27347			-0.81905	-2.18017	-0.300924			-1.30134								-1.31022					-1.72931									-1.56751
blaOXA-10		-2.31961					-1.70884				-1.72863		-1.27178	-2.0058					-1.39265																													-1.04232
blaOXA-134						-2.36008
blaOXA-16																						-1.61414
blaOXA-282						-2.37152
blaOXA-285				-2.26322		-2.36837
blaOXA-347	-1.48865	-1.71257				-2.0697							-2.01526				-1.38153		-0.766711			-1.61448																										-1.59932	-2.02104
blaOXA-362						-1.77973					-1.2827
blaOXA-397												-2.26004
blaOXA-452			-2.20713
blaOXA-460		-1.57484														-1.77501
blaOXA-461	-2.06665										-1.76451	-1.89734	-2.35326				-2.00398		-2.33156																														-2.05502
blaOXA-476			-1.67054
blaOXA-58	-1.35335	-2.13921				-1.91953	-2.02758				-1.04223		-1.83618						-0.486288			-1.153																						-2.03841
blaOXA-85
blaROB-1			-1.83047				-1.78189			-1.67083			-2.27447	-2.0144						-1.98386	-2.18424
blaTEM-1A																																											-1.39159
blaTEM-1B	-0.66928	-1.33454	-1.8044	0.292209	0.0429435	-1.12987	-1.33601				-0.933297		-1.25778	0.307655	-0.0110165	-1.78184	-0.782867	-0.569559			-1.45331	-1.32452						-0.825972	-1.52452		-1.18315							-1.2401	-1.15857			-1.70792							-1.31892
blaTEM-1C								-0.0902862
blaTUS-1							-2.3418												-1.73813
blaZ							-2.05859
bleO	-0.219444	-0.502045	-1.85819	0.410505	-0.771244	0.0957659	-1.83541	-1.13223	-1.51307	-1.71935	-1.2427	-1.64815	-0.416048	-0.130998	-0.644161	-1.58959	0.204036	-0.884814	-1.12364	-1.19043	-0.218517	-0.589978	-0.357843	-0.961502	-1.96841		-0.540737	-1.90606	-1.48624	-0.60793	-1.34108		-1.94993		-2.04898		-0.47351	-1.59191	-1.87153	-2.00247		-0.316855		-1.10851	-2.13581	-1.67311	-1.39842	-1.43082	-0.607309
cat	-1.89725	-2.14769				-1.53525	-2.40363	-1.68022	-2.21803		-2.25228	-2.09183		-1.53192		-1.17236		-2.24084	-2.41833	-1.93407	-1.99455	-2.39151													-1.83838						-1.66277							-2.29388
cat(pC194)		-2.41087				-0.799179	-1.55585			-1.98353	-0.932386	-1.89978	-2.41705			-1.68505	-1.34267			-1.69968		-1.68986								-2.06887												-1.8282						-2.29521
cat(pC221)						-0.827061	-2.39499				-2.11972					-0.977007	-2.37472	-1.9368		-1.89935										-1.77561																		-1.99619
cat(pC233)			-1.93018								-1.99754
catA1					-1.49655	-2.46922								-2.35396														-1.68749
catA2						-2.17484	-2.41382				-2.42747
catB2											-2.43292
catB3		-2.42169
catP												-2.45568	-2.43684	-2.38098
catQ	-2.12963	-1.58529					-2.09363	-1.97139	-2.19815						-2.39806		-1.2056		-1.21788	-2.3579	-2.28926	-2.38024	-2.11979																										-2.11677
catS	-2.25633	-2.22902		-1.88879		-2.29269			-1.61879	-1.80445	-1.55626	-2.1966		-1.03211	-1.19938	-2.43368	-2.01788			-2.48702		-2.51133
cepA														-2.22657				-0.27999
cepA-44							-2.25885
cfr(B)				-0.154018
cfr(C)	-0.597514	-0.360464	0.0364897	0.597901	-0.133957	-0.857599	-1.39525	-0.419066	-0.00489001	-0.88186	-1.11504	-0.310599	-0.452473	0.0910215	0.045275	-0.533875	-1.31063	-0.120101	-0.621841	-0.65406	-0.734871	-0.891453	-1.864				-0.687962	-0.797338			-1.37976	-1.44703	-0.963112					-1.55741	-0.863536	-1.48624			-0.618352				-1.73536	-0.735423	-0.947877
cfxA		-0.408702	-0.494462	-0.614709	-0.0480059	-0.841144	-0.329303			0.0269648	-0.37623		-0.807996		-0.418961	-0.564456	-0.373477				-0.536001	-1.35688						-0.659892																					-0.52098
cfxA3								-0.200374	0.029497			-0.701884		-0.323174					-0.850333	-0.830184
cfxA4																							-1.95193						-1.57981																-1.73764			-2.12382
cfxA5	-0.772245																	-0.722695
cfxA6	-1.17832	-0.445189	-0.682122	-0.925546	-0.0529988	-0.860481	-0.874983	-0.86028	-0.342036	0.0835894	-0.124503	-0.623486	-1.20004	-0.572966	-0.771231	-0.531779	-0.573461	-1.23551	-1.02735	-1.35384	-0.397142	-1.09615	-1.96054					-0.960798	-1.57712										-1.40218									-1.65578	-0.136948
cml					-0.928052			-2.13062									-1.98639	-2.12029
cmlA1					-0.14354	-2.19193					-1.90534			-0.787814			-1.29806	-1.77185										-1.06307
cmlB1						-1.87972
cmr	-1.67571	-0.915836	-1.65164	-0.645981		-1.67045	0.0932466			-1.35654		-1.57348	-1.49744	-1.80017	-1.47071	-1.98576	-1.74433		-1.22215	-0.833549	-1.66579	-0.15124																										-1.96923
cmx	-0.344075	-1.0622		-0.365781		-0.968029	-0.476562	-1.54641	-1.9408	-1.44084	-2.16651	-1.81849	-1.53568	-1.0818	-0.743403	-2.05523	-1.55038	-1.35278	-0.674148	-1.43956	-2.04453	-0.177008	-1.6031	-1.68032			-0.780126																	-1.91283				-1.29017
dfrA1	-1.35572	-1.22916	-2.37414	-1.29184	-1.30315	0.145504	-0.841806	-0.38016		-1.98721	-0.649691	-1.18124	-1.18204	-0.368261	-0.65758	-1.75978	-1.05145	-1.9378	-0.503598	-1.90026	-2.01477	-0.780578								-1.49408					-1.97326		-1.93645		-1.77984					-1.68692				-1.15911
dfrA12	-2.5521		-2.3471		-0.287262		-2.52257	-1.91959						-1.58978	-1.65246			-1.83611		-2.48174								-1.37686	-1.86711
dfrA14	-1.72933	-2.54709		-2.51072													-1.24086	-2.10776	-1.95896				-2.02143																									-2.4321
dfrA15																				-2.50416
dfrA16	-2.57443			-2.50612													-2.51027		-2.08868	-2.50416		-1.64382																										-2.43302
dfrA17																		-0.657715				-2.59496
dfrA20		-1.43703		-1.87319		-1.04985	-1.9301			-1.94072	-1.38515		-1.8241	-2.4662	-2.23627	-2.41807			-0.756752	-2.47224		-0.99691																						-2.25718				-2.40208
dfrA36		-2.45588					-2.14302					-2.42332	-2.46571						-2.44414
dfrA5		-2.5554				-2.60984					-2.55309			-0.44233	-0.668618			-1.677	-2.53865			-2.52939																-1.97645	-1.78075
dfrA7											-2.55672
dfrA8															-2.47368
dfrB1																			-2.53773
dfrD	-0.513387	-1.04894	-1.75208	-1.26306	-2.12023	0.0523254	-0.717065	-2.40819	-2.0185	-0.928212	0.329161	-0.636255	-0.980337	-1.42005	-1.31721	-0.175062	-0.983986	-1.13814	-0.923166	-0.636058	-1.10549	-0.531749	-1.94701	-1.6259						-1.20994	-2.03179				-0.926995	-1.86174	-1.14109					-1.47801		-1.00248	-1.7269	-1.83993	-1.61111	-1.81743
dfrG	-0.476858	-1.14634	-2.04519	-1.53446		-0.44674	-0.851543	-2.09091		-1.55789	-0.673775	-1.31716	-1.52366	-0.890612	-1.4176	-1.09053	-1.5969	-1.10781	-2.51628	-0.669529	-0.742618	-1.23881	-1.64311							-2.11919																		-1.45732	-2.24501
dfrK						-1.1386					-1.55336	-1.72169							-1.78473	-2.48702		-1.77574																		-1.89701				-1.79567			-2.0847
ere(D)	-2.16814					-1.93488					-1.90452	-1.17415	-1.53973						-1.36904			-1.81218																										-1.54283
erm(33)		-1.67934																							-0.982935													-1.80465										-2.04434
erm(35)	-1.51701	-1.75352		-2.27918		-2.08089					-2.0275		-1.42391	-1.97027			-2.11142		-0.816459			-1.21221																									-1.87283	-1.36994	-1.55622
erm(36)	-1.84571	-1.99384																				-2.34267
erm(42)																			-1.56127
erm(45)						-1.72042					-2.06114
erm(46)	-0.735525		-2.13336																				-2.02887	-1.88498
erm(47)	-0.125447	-0.248644	-1.27054	-0.672849		-0.693354	-0.671659	-1.747			-0.863444	-0.50285	-1.38115			-1.06325	-1.14914	-1.59599	-1.40187	-1.55227	-1.4157	-1.02108	-0.908172	-1.13121						-1.31233						-1.67915	-1.50646					-1.77403		-1.61782	-1.84978		-1.90831	-0.570598	-1.46509
erm(50)	-1.91939	-1.74464		-1.97599		-2.08687	-1.25444	-2.19631				-1.44618	-1.92528						-1.8333	-1.42131	-2.2044	-1.88939																							-1.82028			-2.20952
erm(A)	0.0855748	-0.396842	-1.41619	-1.13697	-2.31232	-1.14159	-1.23774	0.19037	-0.512904	-1.37045	-0.616558	-1.54663	-1.95104	-1.01084	-1.23632	-1.03882	-1.72727	-0.497967	-1.08276	-1.63168	-0.318578	-0.971427	-0.326231	-0.665511						-1.73654	0.0200827	-0.206319	-0.930928	-1.63497	-1.57514		-1.74344	-1.87771				-1.47653	-1.11135	-0.799213		-1.75545	-1.59972	-0.364412	-0.783034
erm(B)	0.784043	-0.0827583	0.145571	-0.099531	0.894016	1.16085	0.118388	1.07128	1.22982	0.283134	1.05057	0.412657	0.718771	-0.16983	0.173482	0.847296	0.343533	0.107971	-0.0842448	0.561615	0.99428	0.0739946	0.880715	0.300724	-1.39529	-0.626408		1.23907	0.774805	0.581106	1.52526	0.869715	1.20002	-0.811182	0.629572	-0.9139	0.6577	-0.709574	-0.348322	-0.517501	0.0676529	-0.56212	-0.59974	-0.739859	-0.317521	0.478655	-0.947982	0.222505	-0.0475459
erm(C)	-1.19857					-1.83751	-2.07528				-2.0626	-2.14771	-1.91508			-1.43527	-2.08145		-1.64826		-2.24032	-2.07401	-0.6945	-1.24404						-2.01542	-1.85392					-1.68209	-1.50474	-1.78594		-1.71943	-1.30341			-0.840495				-2.24074
erm(F)	0.0426266	-1.17944	0.272629	-1.054	0.39273	-1.38944	-0.843337	-0.258785	-0.060528	-0.660628	-0.80629	-0.349118	-0.338502	-0.0724856	0.0440888	-0.986297	-0.705537	-0.794668	0.0278796	-1.04822	-0.0701811	-0.627964	-1.14925	-1.58799		-1.5741		-0.47842	-1.45442		-1.34473	-1.59386							-1.01146					-1.94981				-1.50619	-1.08091
erm(G)	-0.0789733	-0.399962	-0.517903	0.229894	0.0196297	-0.30739	0.0598664	0.118358	-0.0364055	-0.423154	-0.589505	-0.590442	-0.660408	0.100784	-0.277459	-0.63965	-0.436981	-1.16735	-0.67514	-0.811919	-0.263658	-0.44899	-0.141222	-0.556235			-1.35029	-0.701973	-0.92865	-0.770056	-0.258575	-0.695146	-0.92646	-1.47853				-1.18477	-1.44542	-1.24113		-1.47184	-1.75378			-1.71632		-1.20111	-1.03737
erm(Q)	-2.05987	-1.76635	-1.57644	-0.328705		-1.92159		-1.72807	-1.70159	-1.31917	-2.34559	-1.69968	-1.65718	-1.58776	-1.62676	-1.49147	-1.60207	-1.72377	-2.02234		-1.11427		-0.961507	-1.54007	-1.66114	-1.11242	-1.46204			-0.854175	-1.22941				-1.76516				-1.62768	-1.69748			-1.52118	-1.59889		-1.20847	-1.58749	-1.74293	-2.04935
erm(T)	0.493331	-1.1814		-2.31653	0.408484	-0.618485	-0.878254	-1.25515	-1.49464	-1.64985	-0.934711	-2.32419	-1.48036	-1.91054	-2.02591	-1.39176	-1.02412		-1.51541	-1.86666	-0.349064	-1.23197	0.35877	-0.10338			-1.66845	0.747774	0.20505	-0.562073	-1.6679						-1.45595		-1.93716	-1.71648	-1.61394	-1.60167		-1.62135	-1.8539	-0.773935	-1.51545	-1.14704
erm(X)	-0.870075	-1.59652	-1.79206	-1.28773		-2.35701	-0.921603		-1.9644	-2.00505	-1.05562	-1.0256	-1.20248	-1.37496	-1.08119	-0.916018	-2.25653	-1.9476	-1.62278	-1.20056	-1.75608	-0.914879	-1.41361																								-1.54404	-0.477757
erm(Y)	-1.68495	-2.36225	-1.87614			-1.12013	-2.34825				-1.32665	-1.32484	-2.36494			-1.14541			-2.34604	-1.48472		-1.19818																										-2.24966	-2.07305
fexA	-2.09548	-0.409247					-1.75756	-1.2773	-0.675249	-1.26019		-0.950803	-2.0753	-0.265562	-0.608912	-1.4049	-2.1006	-1.09033	0.359881	-1.18709	-1.12963	-1.1523			-1.17861													-1.02038	-1.30135				-1.46445	-0.983434				-0.522703	-1.35445
fexB		-0.920348		-1.33463				-1.94564			-2.08388	-1.56414		-1.09025		-1.3994		-0.186785	-1.61004	-2.0398																							-1.45128						-1.78775
floR	-0.837711	-1.17282		-1.06827	0.108977	-1.31179	-1.36993	-1.21576			-0.312209	-0.00246905	-1.16208	-0.142707	-0.425047		-0.7388	-0.890558	0.112135	-1.87534		-0.46093						-1.12098										-1.56729						-0.938221			-1.69225	-1.42216
fosD											-1.61108					-1.73843
fusC						-2.18024
hugA											-2.28057																																					-1.84351
lnu(A)	0.275875	1.07652	-0.506781	0.787505	-0.623242	-0.0827312	-0.475151	-0.160641	-0.0647666	0.0882986	0.183758	0.26326	-0.744687	1.15193	0.934728	-0.002665	-0.493115	-0.315637	-0.605597	0.749604	1.30799	0.445955	0.0716649	-0.696327	0.339244	-0.791642	-0.0695138	-0.464536	-1.17873	-0.777518	-0.607102	-0.781785	-0.723154	-0.596995	-0.407839	-0.27445	-1.31985	0.281194	0.404486	0.0670534	-0.600124	-1.0592	-0.659723	-0.935777	0.182358	0.400508	-0.202032	-0.396019	0.542663
lnu(B)	-0.254908	0.752086	0.241835	0.434385	-0.80701	0.111211	-1.07105	-0.215076	0.165464	-0.413934	0.355881	0.132285	-0.4254	0.044731	0.0238065	0.156276	-0.66828	-1.11148	-0.510901	0.137426	-0.221505	-0.130258	-1.19243	-1.73678	-0.75148	-0.971232	-1.32619	-1.42317		-0.9926	-1.51338	-1.59007	-1.16743		-1.44313	-1.64583	-1.70275		-1.17904	-1.67874	-1.59002		-1.71368	-1.88449	-1.51407		-1.87121	-0.627912	0.0108254
lnu(C)	0.0886893	1.05089	0.395725	0.804746	0.548612	0.0273291	0.2364	0.36574	0.743344	0.596591	0.295868	0.322734	-0.0537168	0.950604	1.02439	0.489751	0.0758445	-0.516744	-0.00679718	0.14599	0.678247	0.469711	-1.03329	-1.6212	-0.579243	-1.23923	-0.784284	-0.227696	-0.777016	-1.18215	-0.843126	-0.95616	-0.900965	-1.01317		-1.55759	-1.43682	-0.976999	-0.172907	-0.782788		-1.56598		-1.57118	-2.02528	-0.835423	-1.30479	-0.327162	0.313486
lnu(D)	-0.975194	-0.328873		-1.78924		-1.07433	-1.82096			-2.40387	-1.3716	-1.1157	-1.71133		-2.5138	-1.01823	-1.81924		-1.81924	-1.12799	-2.10967	-1.28691	-1.6527							-1.74598																		-1.05319	-0.32695
lnu(E)						-1.66669					-1.12461					-1.2662				-2.45794		-2.48474								-2.16595					-1.68854
lnu(F)	-1.73859	-1.70791		-1.35454	-0.00658178	-2.37363	-2.30258					-1.97484		-0.520804	-0.656113													-1.19922												-1.66966								-2.19498
lnu(G)	-0.374652	-0.379826	-1.53614	0.35015	-1.88001	0.740412	-0.438872	-1.71156	-2.1143	-1.12029	0.635473	0.191242	-0.647085	-0.461284	-0.603516	0.733511	-0.368191	-1.7316	-0.621669	0.014014	-0.731514	-0.0923411					-1.31713			-0.678192					-1.7447	-1.04106			-1.59815		-1.0913	-1.73864		-1.15641		-1.61595	-1.82572	-0.297944	-0.602216
lnu(P)	-1.21864	-0.942271	-1.34553	-0.204152	-1.90988	-2.11049	-2.5147	-1.57228	-1.70783	-1.24012		-1.04787	-2.05368	-1.13872	-0.955552	-0.984913	-1.72939	-1.87421	-2.20364	-1.48719	-1.32847	-1.8036	-0.82609	-1.13111	-1.14939	-1.77844	-0.810018	-1.50616		-1.70416	-1.36629		-1.84738			-1.24648		-1.38435	-1.189	-1.10655	-1.47238	-1.34254	-1.64543	-2.26492	-1.29658	-1.57355	-1.47565		-1.76378
lsa(A)						-2.11223								-1.1718	-1.38921
lsa(C)							-2.08388
lsa(E)	0.0164333	1.00889	0.502237	0.63788	-0.439571	0.364277	-0.810607	0.0374835	0.406348	-0.114185	0.586771	0.340318	-0.110433	0.23881	0.202764	0.402676	-0.53589	-1.09385	-0.225551	0.360773	0.0015333	0.1519	-1.02492	-1.45288	-0.833193	-0.724006	-0.748796	-1.01644		-0.652357	-1.5479	-1.32268	-0.807873	-1.32892	-0.98824	-1.37461	-1.31013		-0.996993	-1.21643			-1.44863	-1.60701	-1.08604		-1.5756	-0.357785	0.304184
mdt(A)	-0.0924615			-1.49431		-1.87331		-0.164099		-1.39708		-1.78787						-1.14915			-0.840739		-1.34919	-1.69359
mecA1							-1.9122
mecB						-1.67828
mef(A)	-0.162082	-0.166482	0.0802994	-0.288019	0.727283	-0.287097	-0.168039	0.0912762	0.414702	0.246142	0.150214	-0.190722	-0.357615	-0.586841	-0.479582	-0.330106	-0.129891	0.137525	-0.543197	-0.862113	0.0218537	-0.536259	-0.719632	-1.54446		-1.39406		0.325355	-0.534667	-1.15586	-0.970937		-1.07837			-1.4638	-1.22045	-1.56658	-1.24467				-1.07011	-1.73328		-1.2776	-1.70566	-1.15654	0.0666985
mef(B)				-2.09504				-2.00865					-2.18727						-1.04504
mef(C)	-1.6853		-1.95709		-1.57669	-2.08578	-1.06399				-1.87964	-0.970003	-1.24787				-0.782251	-0.765919	-0.460665	-1.35021		-1.74257																					-1.5317	-1.84418	-1.63158			-2.02889
mph(A)	-1.13197				-0.998665	-1.8456	-1.97649	0.796163							-2.22701		-1.92857	-2.09462										-1.85046			-0.325547	-0.842747
mph(B)	-0.779677	-1.01828		-1.43579	-1.52621	-0.00193108	-1.08575			-1.35622	-0.206265	-0.562354	-0.959933	-0.869669	-1.17525	0.00231571	-1.00472	-2.09318	-0.394693	-0.878744	-1.51832	-0.496258	-0.992722	-1.53429						-1.34913					-1.05457							-1.69213			-1.76044			-1.02311	-1.04532
mph(C)											-2.02508								-1.95993			-2.25744
mph(E)	-0.371023	-0.910589	-1.79474	-1.12193		0.380239	-0.423574			-1.54763	0.259958	-0.278888	-0.96707	-1.75141	-1.14988	-1.57664	-0.0073125	-1.27201	0.453685	-0.644937	-2.16054	0.169603	-1.38093							-0.837675					-1.70301	-1.60192			-1.81107			-1.39524		-0.282104		-1.58229	-0.993854	-1.15224
mph(F)							-2.26126												-1.84281
mph(G)	-1.82581	-2.27733	-2.09309		-1.56767	-1.76033	-1.12297			-2.15153		-1.19209	-1.40101				-1.01238	-0.934144	-0.143652	-1.41042		-2.06696															-1.65965							-1.33301	-1.77256			-1.7248
mph(N)	0.222724	0.252595	-1.04602	-1.2424	-1.45397	0.782803	-0.366486		-1.70223	-0.812939	0.653798	0.32932	-0.37565	-1.26672	-1.27432	0.75338	-0.154761	-2.09175	-1.02984	-0.157597	-0.632908	-0.195955	-0.139282	-0.654463	-1.59395	-1.51971	-1.27301	-1.84998		-0.473267					-0.611894	-0.691286					-1.03799	-1.08238	-1.35941	-2.00571	-1.15838		-1.20618	0.339353	0.180251
msr(A)																			-1.29177
msr(C)				-2.01373
msr(D)	-0.871871	-0.400581	-0.572396	0.0178203	-0.204694	-0.383163	-0.149642	-0.314563	-0.579317	-0.829382	-0.909921	-0.520965	-0.659696	-0.895645	-0.9145	-0.703182	-0.214396	-1.29993	-0.801977	-0.716968	-0.374712	-0.48241	-1.26544						-1.40028	-1.44975												-1.47418						-1.43577	-0.702884
msr(E)	-0.159552	-0.660288	-1.62999	-0.890849		0.573173	-0.211185			-1.24624	0.451107	-0.0820307	-0.758889	-1.51432	-0.762682	-1.36146	0.158491	-0.835686	0.709103	-0.500839		0.382537	-1.34785	-1.62354						-0.745157					-1.48205	-1.38076			-1.58893			-1.47771		-0.105376	-1.30237	-1.36015	-0.916068	-1.13089
nimB				-2.21856						-2.43196	-2.0626			-2.47824			-1.95219					-2.50693
nimF			-2.08251
nimH	-1.82256	-1.79194		-1.3841	-1.15294	-2.14946	-1.77552	-2.43402		-1.83555		-2.53056	-1.80056	-2.21405	-2.21935		-1.54213		-2.25067	-2.51913	-1.84456	-1.63846	-1.97404				-1.87269	-1.67008																					-1.97318
nimJ					-0.902401	-2.59637				-2.15251	-2.53536			-2.00141							-2.42444							-1.70563																					-1.93871
npmA	-0.626284	-0.451474		-0.893161	-2.26664					-1.80137		-1.38607		-1.81205	-2.36105		-2.43723	-0.261863	-0.99843			-0.817396		-1.97272																				-2.19538				-2.28925	-0.946632
optrA	-2.02361			-0.791423		-1.61869								-0.932111	-1.19349			-0.47234	-0.372172			-0.30705	-1.39803																					-0.644608			-0.784548
poxtA		-0.611506		-1.39465		-2.07659	-1.69999	-1.88175						-0.973665	-1.66657			0.184085	-1.6767																								-1.05826						-1.72505
qnrD1	-2.44335																-2.37943
qnrS1	-1.17678				-0.962756								-1.58896	-2.35659			-1.14274	-1.63212					-2.11979					-1.60476
rmtD2		-2.35338			-1.91394					-1.92094	-2.36334						-2.32963					-2.02632
rmtF	-2.05403	-2.33113	-2.15192	-1.98361	-1.889	-2.41587		-1.98877			-2.04065			-2.29983			-1.81775		-2.31809	-2.28545																													-2.04543
rmtG			-2.14199		-1.88408								-2.32972															-1.90552
str	0.293041	-0.572843	-1.11979	-0.98606		-0.131344	-0.676111	-0.608463	-1.13281	-0.440458	0.112314	-0.609923	-1.68218	-0.753234	-1.21347	-0.423771	-0.309671	-0.630628	-0.963911	-0.148068	0.203147	-0.38705	0.199324	-0.364773	-1.31826		-1.68506			-0.411574				-0.79183	-0.28892	-0.473341	-1.37835	-1.02435	-1.35199	-1.65614	-1.24374	-0.455763	-0.399214	-0.509932	-0.182614	-0.714957	-0.848789	-0.357504	-0.894159
sul1	-0.152493	-0.920002		-0.585517	-0.862329	-1.04154	-0.422843	-0.162712	-1.17811	-1.49091	-0.983322	-1.24842	-0.847502	-0.471475	-0.804562	-1.49735	-1.19212	-0.33834	-0.736594	-0.78895	-1.52977	-0.550737	-1.18148	-1.45747				-1.92611			-1.49412						-1.7159		-1.35662									-0.985041	-1.71166
sul2	-0.540054	-0.750776	-1.65464	-0.798051	0.0821026	0.418669	-0.416381	-0.143946	-2.10124	-1.27992	0.410341	0.16555	-0.556077	0.334544	-0.0271568	-0.386765	-0.50116	0.0379148	0.330122	-1.20882	-1.69369	-0.16792	-1.9296		-1.65889			-1.11381		-1.11441	-1.46518						-1.68686	-1.03418	-1.0257				-1.71207	-0.797378			-1.58946	-0.466756	-1.72372
sul3		-2.32781			0.0026835			-2.19576						-1.02499	-1.97903		-1.2942	-0.7706										-0.81937	-1.62084
tet(31)							-2.12322					-1.79813	-1.42616						-1.2732			-1.83655																										-2.01854
tet(32)	-0.940256	-1.22709	-1.18049	-0.912301	-0.928323	-1.69996	-1.18543		-0.864806	-1.07658	-1.34897		-1.34505	-0.936898	-0.965849	-1.35575	-1.21162		-1.18845		-1.77384		-0.949731					-0.967643		-1.23393	-1.26766								-1.45224			-0.884092		-1.68123	-1.43661
tet(33)	-0.168872	-0.843317	-1.95781	-0.633581		-1.37581	-0.22838			-2.01247		-1.52088	-1.36595	-1.18624	-1.28511	-0.95409	-2.09812		-1.07332	-0.513072	-1.37558	-0.396857	-1.16812																					-1.87946				-0.922206
tet(36)	-0.834614	-1.13243	-1.76676	-1.90866		-0.854447	-0.433936			-1.5435	-0.451862	-0.615833	-0.721393			-1.84918	-0.671926		-0.330914			-0.337676																										-0.608147
tet(39)	-1.11961	-1.1736		-1.00341	-2.03607	0.0237336	-0.550786			-1.57447	0.607774	-0.0615711	-0.399585		-1.10345	-1.14773	-0.76308		-0.22796	-0.632099	-2.0657	-0.220901	-1.78783							-1.04612					-1.12284		-0.867869			-1.53609	-1.42446	-1.1514		-0.918064	-1.66902		-1.72871	-0.816894
tet(40)	0.259574	0.364498	0.560979	0.662464	0.723845	0.207867	0.332089	0.745769	0.961361	0.86051	0.571328	0.376961	0.0761498	0.717327	0.641998	0.336458	0.281871	-0.360647	-0.161173	0.186398	0.206716	-0.0724194	-1.0521	-1.38434	-1.15974	-1.39121	-1.14156	-0.099684	-0.836062	-1.18363	-0.434112	-0.605275	-0.43966	-1.03604				-1.04135	-0.949605		-1.36545	-1.51122	-1.29437	-1.66547		-1.14758		-0.219667	-0.0172393
tet(42)									-1.90353
tet(44)	0.473105	0.492457	0.492901	0.368088	0.705959	0.543618	0.238011	0.408546	0.796883	0.716211	0.0972355	0.200085	0.389568	0.266375	0.0249966	0.0903748	0.247371	-0.740586	0.317684	0.18681	0.0338425	-0.113072	-0.224863	-1.38775	-0.736953	-0.856375		0.373984	-0.460633	-0.263152	-0.374757	-0.730866	-0.642885	-0.646531		-0.798641		-1.0386	-0.338988	-0.701214	-1.18925	-0.873807		-1.19398	-0.959794	-0.929901		-0.48188	-0.370616
tet(59)						-0.355314		-1.71048																						-1.4991
tet(A)	-0.856139	-1.27186	-1.66288		0.0140025	-2.20827	-0.425158	-0.0454439		-1.75664	-1.70503	-1.28962	-0.958492	-0.0691834	-0.249537	-1.8881	-0.371241	-0.682642	-0.912352	-2.09819		-1.65834	-1.63437	-1.29159					-1.00803									-1.26752				-1.56562		-1.28324				-1.64311
tet(B)	-1.27847			-0.0965851	-0.549509			-0.531989	-1.04255	-0.98812	-1.36633	-1.82593	-1.45299	-1.24391	-1.19884		-1.41729	-1.8006			-1.728							-1.28017			-1.64211							-1.57196
tet(C)	-2.19674	-1.86319	-1.66633			-2.27			-1.26661			-1.7335	-1.15004				-1.79164		-1.48719																														-1.6162
tet(D)						-1.73661
tet(G)	-1.87858																		-1.2924
tet(H)	-1.02222	-0.985133	-1.96319	-0.976828	-2.00549	0.324486	-0.93266	-2.03023			-0.144892	-1.18333	-0.390573			-1.27986	-1.37869	-1.83823	-0.530898	-1.70257		-0.295738								-1.31894					-1.57771		-1.52973											-0.531453
tet(K)							-2.0775				-1.2048								-2.29287	-1.64382		-1.82256				-1.33777					-1.27899				-1.20952			-1.51298						-0.941214	-1.46981		-1.8306
tet(L)	-0.545583	0.417509	0.753129	-1.38039	-0.674561	-0.130829	-0.216471	0.178437	0.691052	-0.60464	0.220364	0.0305311	-0.300517	0.507862	0.0556321	-0.393911	-0.0985948	-1.22736	-0.833401	0.409411	-1.06265	-0.845116			-0.295316	-0.155335		-1.39359	-1.4273	-0.953182	-0.331504	-0.360635	-0.21048	-1.36027	-0.959895	-1.10841	-0.0225568	-0.28461	-0.186974	-0.858134	-1.33474	-0.688967	-1.17952	-0.643519	-0.554432		-1.46199	-0.714589	-0.351318
tet(M)	0.595049	-0.132041	-0.872312	-0.615496	-0.194128	0.503129	0.126915	-0.305535	-0.571109	-0.0453297	0.303068	-0.112833	-0.566116	-0.322485	-0.559014	0.367747	0.017803	-0.447883	-0.4616	0.0341744	-0.143784	-0.175488	-0.362913	-0.467295	-0.921647			-0.38852	-0.944928	-0.224846	-1.13503	-0.97043	-1.26742	-0.656592	-0.597225	-1.2274	-1.12368	-0.891805			-1.1906	-0.600605	-1.12784	-1.40817	-0.807655	-1.0483	-1.33569	-0.397524	0.0534035
tet(O)	0.391848	0.417909	0.599056	0.666954	0.664187	0.316991	0.485994	0.62261	0.917252	0.869645	0.520139	0.379238	0.23845	0.862167	0.744493	0.399694	0.30331	-0.00573557	0.0813835	0.267245	0.00651371	-0.0729413	-0.746657	-0.889454		-0.655783	-1.12396	-0.268284		-0.784067	-0.480709	-1.12535	-0.551902	-0.408032				-1.37029	-1.00712	-0.869367			-0.988036	-1.04547	-0.889962	-1.26466	-1.3543	-0.410503	-0.0360306
tet(O/32/O)	0.213915	0.119828	0.658313	0.601707	0.563322	0.256861	0.233397	0.96363	0.726486	0.432894	0.383661	0.0924248	-0.245195	0.32034	0.110955	0.222502	0.132406	-0.518763	-0.114208	-0.270271	-0.144506	-0.103528	-0.781197	-1.40464	-1.26716		-1.25139	0.123721	-0.4556	-1.2036	-0.548424	-0.161671	-0.409053	-0.855239		-1.19446	-1.05309	-1.16269	-0.54172	-0.657216		-0.895011	-1.3389	-1.72973	-1.43684		-1.49469	0.0894111	0.022433
tet(O/W)	-0.84556	-0.192038	-0.627512	-0.579478	-0.469029	-0.839809	-0.825616	-0.492039	0.203412	-0.067001	-0.349549	-0.58372	0.0976606	-0.044151	-0.261687	-0.28907	-0.773967	-0.722267	-0.297227	-0.695976	-0.17809	-0.558106						-0.965703																	-1.33898			-0.815875	-0.809996
tet(O/W)-1	-1.25686	-1.23429	-1.28137		-1.00733	-1.82535	-1.93259	-1.48243	-1.43131	-1.19538	-1.25147	-1.07754		-1.45218	-1.66737	-1.57358	-1.64067	-1.8236			-1.28226	-1.35949																										-1.28866
tet(O/W/32/O)	0.508853	1.37334	1.14942	-0.903264	-1.50205	0.85284	0.319995	0.531109	0.963916	-0.940534	1.20414	0.666727	-1.1221	0.904069	0.974925	0.265757	-1.59791		-1.1847	1.27426	-0.930183	-1.10297	-0.142788	-0.646889	0.338371	0.231848				-0.345835	-0.0849464	-0.135933	-0.0102594		-0.418564	-0.576406		-0.0244516	0.208288	-0.167512	-0.612142			-1.21921	0.456347		-1.49289	-0.336943	0.452009
tet(O/W/32/O/W/O)		-1.03127				-1.23314
tet(O/W/O)-1																	-1.90344
tet(O/W/O)-2						-1.42867
tet(Q)	0.359555	0.448018	0.550635	0.0506151	0.710175	-0.0170812	0.144648	0.310781	0.494703	0.277836	0.298336	0.283593	0.177192	0.469774	0.467897	0.0245999	0.281843	0.177517	0.2343	-0.17632	0.419656	-0.151541	-0.828517					0.333939	-0.549898	-0.866008	-0.417294		-0.746697	-0.913541	-1.36756	-1.2653	-1.27009	-1.16594	-0.413351	-0.978691	-1.19151		-1.27607	-1.23068				-0.389397	0.47284
tet(S)	0.154871	0.509295		-0.574462		-1.29565	0.395899	-0.880578		0.0193769	-1.70967	-0.0597674	-0.670059	-0.824139	-1.01202	-1.02963	0.186578	-0.49359	-1.25048	-0.112575	-0.285883		-0.478956	-1.49626	-0.929831									-1.21378								-0.882661			-1.00594			0.361805	0.192555
tet(S/M)			-1.27943			-0.608984					-1.39567									-1.49021		-1.44532																	-1.17177
tet(T)	0.678141	0.21898	-0.54698	-0.510737		-0.110515	-0.0409165	-1.49253		-1.76422	-0.146418	-0.197354	-0.944246	-1.25399	-1.51464	-0.728466	-0.656125		-0.804442	-1.05904		-0.310568	0.589217	-0.0250039	-1.26489					-0.893093					-0.476072		-1.01504					-0.997839		-0.590189			-1.18282	-0.388669	-0.508108
tet(W)	1.21141	1.28175	0.884398	0.931742	1.03985	0.741571	1.26197	1.36339	1.75283	1.39447	1.03085	1.03002	1.0943	1.39763	1.28453	1.26501	0.992115	0.433922	0.656677	0.853691	1.05308	0.958363	1.27611	0.737686	0.151489	0.0491071	-0.278477	0.737734	0.556844	0.255458	1.15051	0.831857	0.778565	0.570727	-0.349449	0.0624427	0.46458	0.587713	0.799932	0.479987	-0.305356	0.0166923	-0.472855	0.188841	0.0683888	0.0616375	0.0831245	0.714149	0.886382
tet(W/32/O)		-1.52204	-1.75902	-1.78073	-1.31188	-1.70629		-1.61928		-1.42953	-2.02134		-0.389326	-1.37772	-1.16669		-1.7084	-0.894501	-0.560329	-0.865287	-0.45094	-0.875442
tet(X)	-0.392861	-1.21595	-0.245707	-1.01159	-0.701445	-0.711775	-0.521713	-0.418268	-0.294765	-0.999035	-0.739075	0.0252686	-0.717325	-1.00448	-1.2639	-1.44694	-0.519073	-0.649829	-0.131499	-0.54764	-0.548636	-0.725088	-1.34863	-1.46109																								-0.910248	-1.2763
tet(X3)	-1.37904	-1.55465		-1.53183		-1.54198	-2.14376	-1.86708		-2.03066	-0.481534	-0.649685	-1.40488						-0.487838			-0.625369
tet(X5)	-2.18913					-0.726896	-1.84365				-0.373265	-0.0157403	-1.07658		-2.12206	-1.81537			-1.24303			-1.20481								-1.81442																		-1.13863
tet(X6)		-1.04558		-2.13945		-0.0862201	-1.07096	-2.04433		-1.12683	0.300431	-0.590463	-0.702568	-1.91468	-1.35072	-0.123959	-1.05827		-0.687496	-1.52229		-0.785589																						-1.65258				-0.316039
tet(Y)	-1.52421	-2.15448		-2.11241		-1.20783	-1.30788				-0.72211					-1.83717		-1.98468	-1.20266			-1.15319																						-1.89398				-2.03839
tet(Z)	-0.0600333	-0.959247		-0.946758		-1.62281	-0.212316	-2.03286		-1.1328		-1.22707	-1.3724	-0.95573	-0.808521	-1.48835	-1.22129	-1.79914	-1.00194	-0.636882	-2.04717	-0.238898	-1.16716	-1.17845										-1.43518					-1.69581					-1.9018			-1.71421	-1.04723
tetA(P)	-0.0138973	-0.230875	-0.236811	0.560153	-0.390262	-0.753841	-0.807262	0.171949	0.105085	0.0673576	-1.54966	-0.396729	-0.668878	-0.152775	-0.0427946	-0.277316	-0.63088	-0.88582	-0.643764	-0.35612	-0.44053	-1.4752	0.272926	-0.130667	-0.525682	-1.07688	-0.163432	-0.482218	-0.565204	-0.256721	0.184534	-0.111402	-0.319619	-0.613698		-0.97123	-1.20697	-0.814449	-0.313661	-0.622497	-0.591608	-0.837174	-0.764384	-0.906594	-0.421839	-0.669979	-0.995644	-1.34194	-0.803304
tetB(P)	-0.9667	-0.915537	-1.30817	-0.47471	-1.73273	-1.14163	-1.44317	-0.894675	-0.313366	-0.611718	-1.94207	-1.95596	-0.77773	-0.744236	-0.638399	-0.805723	-0.909745		-0.962337	-0.878875	-0.841704	-1.77347	-0.427169	-0.730718	-1.25616	-1.18735			-1.27164	-0.835911	-0.991936	-1.20316	-0.956748	-1.24701					-1.04419	-1.00992	-1.23039		-1.32744	-1.17489	-1.42675	-1.23787	-1.48617
tva(A)		-2.04165	-1.31681
vat(A)		-2.40424			-1.96429	-0.442555					-1.48113	-2.37159	-2.45321			-1.22757														-2.06223																		-2.28991
vat(B)																			-2.40733
vat(E)	-0.509843	-0.00140573	-0.764745	-0.893964	-0.641824	-0.119897	-1.32579	0.00091557	0.0319462	-0.581622	-1.19432	-0.971706	-0.829511	-0.559605	-0.623008	-0.505557	-1.04734	-1.36137	-0.394495	-0.915529	0.116304	-0.0519841	-1.28909					-1.22035	-1.75477	-1.45836	-1.57191		-1.74025	-1.69203					-1.68909					-1.78177		-1.25508	-1.66628	-0.788088	-0.730712
vga(A)LC																				-1.98414
vga(A)V		-1.15482		-1.98609				-1.89748			-0.551875								-0.965294	-1.2933																								-1.32716
vga(C)	-0.998737	-0.961259	-0.948283	-1.98636		0.237042	-1.65571	-1.69548	-1.51501		0.242743	0.278831	-0.461339			0.308273	-1.38928		-0.492989	-0.120189		-0.904083	-1.11932		-1.29729		-1.35718			-0.48635					-0.756862	-0.663638	-1.41209				-0.579084			-0.727739	-0.827749		-1.5822	-1.09617
vga(E)	-0.466809	-0.345455	-1.07102	-1.19159	-1.58345	-0.00629857	-0.97845		-1.81299	-1.20222	0.414422	0.171435	-0.541131	-0.324549	-0.514628	0.205643	-1.76487		-1.03296	0.239328	-0.0647669	-0.239068								-1.5777							-1.41099							-1.77107		-1.03051		-0.959206	-1.07021
vgb(A)					-1.82892	-0.336426					-1.67802	-2.23768				-0.982845						-2.09419								-1.45363																		-2.15455
[truncated: 4 more columns]

## Sheet: Table_S14
E. coli SI / MAG	Completeness	Contamination	Genome/MAG size, bp	MAG to genome size,%	Phylogeny	SNPs differrence
MAG_LVK_48	93.69	0	4645837	81.3797	closely related	3557		MAG 48 and 43 are the most closely related to LVK_48 and 43 among the other EC isolates with 3557 and 6719 SNPs, respectively.
SI_LVK_48			5708843
MAG_LVK_17	99.81	0.84	4680341	84.421
SI_LVK_17			5544046
MAG_LVK_42	60.63	0.15	2944603	52.7875
SI_DTU_42C			5578220
MAG_LVK_43	86.06	0.66	4359784	77.2269	closely related	6719
SI_LVK_43			5645424
MAG_LVK_74	99.96	1.37	4687126	83.5581	closely related	1041		But also 1662 to LVK_17 and 1815 to DTU_42C and 2094 to LVK_102 (and they are all in one cluster in the phylogeny).
SI_LVK_74			5609424
MAG_LVK_97	90.58	3.37	4711203	83.2121
SI_LVK_97			5661682
MAG_LVK_11	100	0.7	4879530	85.1237
SI_LVK_11			5732284
MAG_LVK_80	87.91	1.62	4359089	71.3206
SI_LVK_80			6111964
SI_DTU_80C			5315669
MAG_LVK_82	66.51	0.49	3195676	57.6179	closely related	4419		but also 4503.00 to DTU_83A and 4205.00 to LVK_83. Although the comparison between the MAG and SIs is based on only 57% of the genomes.
SI_DTU_82A			5546326
MAG_LVK_18	92.67	4.56	4881060
MAG_LVK_88	72.05	2.05	3292191	64.0256
SI_DTU_88A			5141993
MAG_LVK_56	100	2.53	5008412	85.8317
SI_DTU_56B			5835153
MAG_LVK_98	54.96	2.59	2618441	47.863
SI_LVK_98			5470704
MAG_LVK_83	100	3.6	5009869	90.40 / 89.85	closely related	278/503		And 407.00 to DTU_82A.
SI_DTU_83A			5541971
SI_LVK_83			5575722

[truncated: 3 more sheets: Table_S15, Table_S16_a, Table_S16_b]
