# Supplementary material for: Metagenomics provides broad detection of pathogens, antimicrobial resistance, and virulence genes in pig diarrhoea and complement conventional methods
Source: Research Square preprint supplement (doi:10.21203/rs.3.rs-8285969/v1), 2025-12-19
Supplement: Supplementary file 9 [file f473eb75e5ec556a5cb6c58c.xlsx]

## Sheet: Table_S2
Sample	# Sequence ID	Num	Score	Expected	Template_length	Query_Coverage	Template_Coverage	Depth	tot_query_Coverage	tot_template_Coverage	tot_depth	q_value	p_value	Accession Number	Description	TAXID	Taxonomy	TAXID Species	Species
DTU_2024_1036000_100_SI_CP_102A_SE.fq.gz.output	GCF_003350945.1	15143	28676631	982	116360	76.86	283.43	246.45	76.86	283.43	246.45	2.86737e+07	1e-26	NZ_CP028149.1	Clostridium perfringens strain JXJA17 isolate Intestine chromosome, complete genome	1502	cellular organisms; Bacteria; Terrabacteria group; Firmicutes; Clostridia; Eubacteriales; Clostridiaceae; Clostridium; Clostridium perfringens	1502	Clostridium perfringens
DTU_2024_1035999_100_SI_CP_100B_SE.fq.gz.output	GCF_018135545.1	5330	31387902	755	115732	84.88	276.78	271.21	84.88	276.78	271.21	3.13856e+07	1e-26	NZ_CP073070.1	Clostridium perfringens strain 19TSBNCP chromosome, complete genome	1502	cellular organisms; Bacteria; Terrabacteria group; Firmicutes; Clostridia; Eubacteriales; Clostridiaceae; Clostridium; Clostridium perfringens	1502	Clostridium perfringens
DTU_2024_1035998_100_SI_CP_97A_SE.fq.gz.output	GCF_003350945.1	15143	42664722	1318	116360	80.2	276.85	366.66	80.2	276.85	366.66	4.26608e+07	1e-26	NZ_CP028149.1	Clostridium perfringens strain JXJA17 isolate Intestine chromosome, complete genome	1502	cellular organisms; Bacteria; Terrabacteria group; Firmicutes; Clostridia; Eubacteriales; Clostridiaceae; Clostridium; Clostridium perfringens	1502	Clostridium perfringens
DTU_2024_1035997_100_SI_CP_94C_SE.fq.gz.output	GCF_003350945.1	15143	33366950	873	116360	81.79	285.9	286.76	81.79	285.9	286.76	3.33643e+07	1e-26	NZ_CP028149.1	Clostridium perfringens strain JXJA17 isolate Intestine chromosome, complete genome	1502	cellular organisms; Bacteria; Terrabacteria group; Firmicutes; Clostridia; Eubacteriales; Clostridiaceae; Clostridium; Clostridium perfringens	1502	Clostridium perfringens
DTU_2024_1035996_100_SI_CP_93B_SE.fq.gz.output	GCF_001304735.1	10294	48531663	1407	117003	81.29	280.75	414.79	81.29	280.75	414.79	4.85274e+07	1e-26	NZ_CP009557.1	Clostridium perfringens strain FORC_003, complete genome	1502	cellular organisms; Bacteria; Terrabacteria group; Firmicutes; Clostridia; Eubacteriales; Clostridiaceae; Clostridium; Clostridium perfringens	1502	Clostridium perfringens
DTU_2024_1035995_100_SI_CP_83B_SE.fq.gz.output	GCF_003350945.1	15143	28665905	934	116360	77.66	274.32	246.36	77.66	274.32	246.36	2.86631e+07	1e-26	NZ_CP028149.1	Clostridium perfringens strain JXJA17 isolate Intestine chromosome, complete genome	1502	cellular organisms; Bacteria; Terrabacteria group; Firmicutes; Clostridia; Eubacteriales; Clostridiaceae; Clostridium; Clostridium perfringens	1502	Clostridium perfringens
DTU_2024_1035994_100_SI_CP_78B_SE.fq.gz.output	GCF_020138775.1	12018	46916544	2866	114582	68.18	343.8	409.46	68.18	343.8	409.46	4.69079e+07	1e-26	NZ_CP075979.1	Clostridium perfringens strain CPI 18-6 chromosome	1502	cellular organisms; Bacteria; Terrabacteria group; Firmicutes; Clostridia; Eubacteriales; Clostridiaceae; Clostridium; Clostridium perfringens	1502	Clostridium perfringens
DTU_2024_1035993_100_SI_CP_68B_SE.fq.gz.output	GCF_020138415.1	24224	40393300	3012	115587	66.37	242.27	349.46	66.37	242.27	349.46	4.03843e+07	1e-26	NZ_CP075917.1	Clostridium perfringens strain CPLi3-1 chromosome, complete genome	1502	cellular organisms; Bacteria; Terrabacteria group; Firmicutes; Clostridia; Eubacteriales; Clostridiaceae; Clostridium; Clostridium perfringens	1502	Clostridium perfringens
DTU_2024_1035992_100_SI_CP_61B_SE.fq.gz.output	GCF_900475545.1	1903	46561553	1613	115265	80.4	273.56	403.95	80.4	273.56	403.95	4.65567e+07	1e-26	NZ_LS483393.1	Clostridium perfringens strain NCTC13170 genome assembly, chromosome: 1	1502	cellular organisms; Bacteria; Terrabacteria group; Firmicutes; Clostridia; Eubacteriales; Clostridiaceae; Clostridium; Clostridium perfringens	1502	Clostridium perfringens
DTU_2024_1035991_100_SI_CP_60B_SE.fq.gz.output	GCF_003350945.1	15143	34992530	992	116360	81.51	284.06	300.73	81.51	284.06	300.73	3.49896e+07	1e-26	NZ_CP028149.1	Clostridium perfringens strain JXJA17 isolate Intestine chromosome, complete genome	1502	cellular organisms; Bacteria; Terrabacteria group; Firmicutes; Clostridia; Eubacteriales; Clostridiaceae; Clostridium; Clostridium perfringens	1502	Clostridium perfringens
DTU_2024_1035990_100_SI_CP_59B_SE.fq.gz.output	GCF_003350945.1	15143	47197384	1335	116360	81.57	284.15	405.62	81.57	284.15	405.62	4.71934e+07	1e-26	NZ_CP028149.1	Clostridium perfringens strain JXJA17 isolate Intestine chromosome, complete genome	1502	cellular organisms; Bacteria; Terrabacteria group; Firmicutes; Clostridia; Eubacteriales; Clostridiaceae; Clostridium; Clostridium perfringens	1502	Clostridium perfringens
DTU_2024_1035989_100_SI_CP_52B_SE.fq.gz.output	GCF_003350945.1	15143	44368372	1386	116360	80.26	281.39	381.3	80.26	281.39	381.3	4.43642e+07	1e-26	NZ_CP028149.1	Clostridium perfringens strain JXJA17 isolate Intestine chromosome, complete genome	1502	cellular organisms; Bacteria; Terrabacteria group; Firmicutes; Clostridia; Eubacteriales; Clostridiaceae; Clostridium; Clostridium perfringens	1502	Clostridium perfringens
DTU_2024_1035988_100_SI_CP_50D_SE.fq.gz.output	GCF_020138335.1	3186	46059887	2731	109192	70.64	242.75	421.82	70.64	242.75	421.82	4.60517e+07	1e-26	NZ_CP075903.1	Clostridium perfringens strain CPS 2a chromosome, complete genome	1502	cellular organisms; Bacteria; Terrabacteria group; Firmicutes; Clostridia; Eubacteriales; Clostridiaceae; Clostridium; Clostridium perfringens	1502	Clostridium perfringens
DTU_2024_1035987_100_SI_CP_46A_SE.fq.gz.output	GCF_020139275.1	9858	47815921	2575	115946	75.36	239.85	412.4	75.36	239.85	412.4	4.78082e+07	1e-26	NZ_CP076000.1	Clostridium perfringens strain AAD 1527a chromosome	1502	cellular organisms; Bacteria; Terrabacteria group; Firmicutes; Clostridia; Eubacteriales; Clostridiaceae; Clostridium; Clostridium perfringens	1502	Clostridium perfringens
DTU_2024_1035986_100_SI_CP_43C_SE.fq.gz.output	GCF_003350945.1	15143	31359326	860	116360	79.47	282.37	269.5	79.47	282.37	269.5	3.13567e+07	1e-26	NZ_CP028149.1	Clostridium perfringens strain JXJA17 isolate Intestine chromosome, complete genome	1502	cellular organisms; Bacteria; Terrabacteria group; Firmicutes; Clostridia; Eubacteriales; Clostridiaceae; Clostridium; Clostridium perfringens	1502	Clostridium perfringens
DTU_2024_1035985_100_SI_CP_32A_SE.fq.gz.output	GCF_900475545.1	1903	31560956	1186	115265	79.47	272.96	273.81	79.47	272.96	273.81	3.15574e+07	1e-26	NZ_LS483393.1	Clostridium perfringens strain NCTC13170 genome assembly, chromosome: 1	1502	cellular organisms; Bacteria; Terrabacteria group; Firmicutes; Clostridia; Eubacteriales; Clostridiaceae; Clostridium; Clostridium perfringens	1502	Clostridium perfringens
DTU_2024_1035984_100_SI_CP_27B_SE.fq.gz.output	GCF_003350945.1	15143	30574680	963	116360	78.7	282.93	262.76	78.7	282.93	262.76	3.05718e+07	1e-26	NZ_CP028149.1	Clostridium perfringens strain JXJA17 isolate Intestine chromosome, complete genome	1502	cellular organisms; Bacteria; Terrabacteria group; Firmicutes; Clostridia; Eubacteriales; Clostridiaceae; Clostridium; Clostridium perfringens	1502	Clostridium perfringens
DTU_2024_1035983_100_SI_CP_26D_SE.fq.gz.output	GCF_003350945.1	15143	28644848	885	116360	79.02	282.9	246.17	79.02	282.9	246.17	2.86422e+07	1e-26	NZ_CP028149.1	Clostridium perfringens strain JXJA17 isolate Intestine chromosome, complete genome	1502	cellular organisms; Bacteria; Terrabacteria group; Firmicutes; Clostridia; Eubacteriales; Clostridiaceae; Clostridium; Clostridium perfringens	1502	Clostridium perfringens
DTU_2024_1035982_100_SI_CP_15B_SE.fq.gz.output	GCF_020138775.1	12018	36509446	2585	114582	64.71	257.74	318.63	64.71	257.74	318.63	3.65017e+07	1e-26	NZ_CP075979.1	Clostridium perfringens strain CPI 18-6 chromosome	1502	cellular organisms; Bacteria; Terrabacteria group; Firmicutes; Clostridia; Eubacteriales; Clostridiaceae; Clostridium; Clostridium perfringens	1502	Clostridium perfringens
DTU_2024_1035981_100_SI_CP_14A_SE.fq.gz.output	GCF_020138775.1	12018	40104470	2415	114582	71.47	243.4	350.01	71.47	243.4	350.01	4.00972e+07	1e-26	NZ_CP075979.1	Clostridium perfringens strain CPI 18-6 chromosome	1502	cellular organisms; Bacteria; Terrabacteria group; Firmicutes; Clostridia; Eubacteriales; Clostridiaceae; Clostridium; Clostridium perfringens	1502	Clostridium perfringens
DTU_2024_1035980_100_SI_CP_12D_SE.fq.gz.output	GCF_020138355.1	2737	41738203	2478	114271	71.17	250.01	365.26	71.17	250.01	365.26	4.17308e+07	1e-26	NZ_CP075905.1	Clostridium perfringens strain CPN 17a chromosome, complete genome	1502	cellular organisms; Bacteria; Terrabacteria group; Firmicutes; Clostridia; Eubacteriales; Clostridiaceae; Clostridium; Clostridium perfringens	1502	Clostridium perfringens
DTU_2024_1035979_100_SI_CP_11D_SE.fq.gz.output	GCF_003350945.1	15143	30730693	1334	116360	72.43	280.36	264.1	72.43	280.36	264.1	3.07267e+07	1e-26	NZ_CP028149.1	Clostridium perfringens strain JXJA17 isolate Intestine chromosome, complete genome	1502	cellular organisms; Bacteria; Terrabacteria group; Firmicutes; Clostridia; Eubacteriales; Clostridiaceae; Clostridium; Clostridium perfringens	1502	Clostridium perfringens
DTU_2024_1035978_100_SI_CP_10C_SE.fq.gz.output	GCF_020138795.1	14647	35852043	2230	114272	71.77	241.4	313.74	71.77	241.4	313.74	3.58454e+07	1e-26	NZ_CP075981.1	Clostridium perfringens strain CPI 18-1b chromosome	1502	cellular organisms; Bacteria; Terrabacteria group; Firmicutes; Clostridia; Eubacteriales; Clostridiaceae; Clostridium; Clostridium perfringens	1502	Clostridium perfringens
DTU_2024_1035977_100_SI_DTU_101B_SE.fq.gz.output	GCF_016767775.1	19650	20996879	1048	156333	79.22	282.45	134.31	79.22	282.45	134.31	2.09937e+07	1e-26	NZ_CP056077.1	Escherichia coli strain MS1170 chromosome, complete genome	562	cellular organisms; Bacteria; Proteobacteria; Gammaproteobacteria; Enterobacterales; Enterobacteriaceae; Escherichia; Escherichia coli	562	Escherichia coli
DTU_2024_1035976_100_SI_DTU_88A_SE.fq.gz.output	GCF_016942475.1	19226	18483987	1426	160711	71.66	257.8	115.01	71.66	257.8	115.01	1.84797e+07	1e-26	NZ_CP063332.1	Escherichia coli strain BS74R-D chromosome, complete genome	562	cellular organisms; Bacteria; Proteobacteria; Gammaproteobacteria; Enterobacterales; Enterobacteriaceae; Escherichia; Escherichia coli	562	Escherichia coli
DTU_2024_1035975_100_SI_DTU_83A_SE.fq.gz.output	GCF_008375335.1	11534	17943861	1636	158330	67.05	281.51	113.33	67.05	281.51	113.33	1.7939e+07	1e-26	NZ_CP041627.1	Escherichia coli strain ETEC6 chromosome, complete genome	562	cellular organisms; Bacteria; Proteobacteria; Gammaproteobacteria; Enterobacterales; Enterobacteriaceae; Escherichia; Escherichia coli	562	Escherichia coli
DTU_2024_1035974_100_SI_DTU_82A_SE.fq.gz.output	GCF_008375335.1	11534	20566198	1936	158330	65.89	281.51	129.89	65.89	281.51	129.89	2.05604e+07	1e-26	NZ_CP041627.1	Escherichia coli strain ETEC6 chromosome, complete genome	562	cellular organisms; Bacteria; Proteobacteria; Gammaproteobacteria; Enterobacterales; Enterobacteriaceae; Escherichia; Escherichia coli	562	Escherichia coli
DTU_2024_1035973_100_SI_DTU_80C_SE.fq.gz.output	GCF_013201525.1	12556	19162113	1943	160209	64.27	265.47	119.61	64.27	265.47	119.61	1.91563e+07	1e-26	NZ_CP053787.1	Escherichia coli isolate J31 chromosome, complete genome	562	cellular organisms; Bacteria; Proteobacteria; Gammaproteobacteria; Enterobacterales; Enterobacteriaceae; Escherichia; Escherichia coli	562	Escherichia coli
DTU_2024_1035972_100_SI_DTU_79A_SE.fq.gz.output	GCF_013357365.1	6989	26038922	1957	186733	73.02	264.74	139.44	73.02	264.74	139.44	2.6033e+07	1e-26	NZ_CP050498.1	Escherichia coli strain RM13322 chromosome, complete genome	562	cellular organisms; Bacteria; Proteobacteria; Gammaproteobacteria; Enterobacterales; Enterobacteriaceae; Escherichia; Escherichia coli	562	Escherichia coli
DTU_2024_1035971_100_SI_DTU_76C_SE.fq.gz.output	GCF_016776365.1	8910	20425367	3912	164557	52.7	217.62	124.12	52.7	217.62	124.12	2.04136e+07	1e-26	NZ_CP068802.1	Escherichia coli strain RIVM_C018249 chromosome, complete genome	562	cellular organisms; Bacteria; Proteobacteria; Gammaproteobacteria; Enterobacterales; Enterobacteriaceae; Escherichia; Escherichia coli	562	Escherichia coli
DTU_2024_1035970_100_SI_DTU_60C_SE.fq.gz.output	GCF_016403975.2	11777	25142525	2596	170343	66.8	263.54	147.6	66.8	263.54	147.6	2.51347e+07	1e-26	NZ_CP075649.1	Escherichia coli strain STEC17-190 chromosome, complete genome	562	cellular organisms; Bacteria; Proteobacteria; Gammaproteobacteria; Enterobacterales; Enterobacteriaceae; Escherichia; Escherichia coli	562	Escherichia coli
DTU_2024_1035969_100_SI_DTU_56B_SE.fq.gz.output	GCF_019976915.1	5175	18510748	2255	163463	62.44	285.93	113.24	62.44	285.93	113.24	1.8504e+07	1e-26	NZ_AP024521.1	Escherichia coli strain E189 chromosome, complete genome	562	cellular organisms; Bacteria; Proteobacteria; Gammaproteobacteria; Enterobacterales; Enterobacteriaceae; Escherichia; Escherichia coli	562	Escherichia coli
DTU_2024_1035968_100_SI_DTU_52A_SE.fq.gz.output	GCF_019976915.1	5175	19052525	2362	163463	62.11	285.92	116.56	62.11	285.92	116.56	1.90454e+07	1e-26	NZ_AP024521.1	Escherichia coli strain E189 chromosome, complete genome	562	cellular organisms; Bacteria; Proteobacteria; Gammaproteobacteria; Enterobacterales; Enterobacteriaceae; Escherichia; Escherichia coli	562	Escherichia coli
DTU_2024_1035967_100_SI_DTU_48A_SE.fq.gz.output	GCF_013201525.1	12556	22234465	2582	160209	63.38	265.65	138.78	63.38	265.65	138.78	2.22267e+07	1e-26	NZ_CP053787.1	Escherichia coli isolate J31 chromosome, complete genome	562	cellular organisms; Bacteria; Proteobacteria; Gammaproteobacteria; Enterobacterales; Enterobacteriaceae; Escherichia; Escherichia coli	562	Escherichia coli
DTU_2024_1035966_100_SI_DTU_42C_SE.fq.gz.output	GCF_004792495.1	18788	26034223	2974	159215	64.21	267.1	163.52	64.21	267.1	163.52	2.60253e+07	1e-26	NZ_CP038857.1	Escherichia coli strain PigCaeca_2 chromosome, complete genome	562	cellular organisms; Bacteria; Proteobacteria; Gammaproteobacteria; Enterobacterales; Enterobacteriaceae; Escherichia; Escherichia coli	562	Escherichia coli
DTU_2024_1035965_100_SI_LVK_103_SE.fq.gz.output	GCF_900196535.2	22106	27712946	1365	168454	79.34	277.61	164.51	79.34	277.61	164.51	2.77089e+07	1e-26	NZ_CP043542.1	Escherichia coli strain F2_81 chromosome, complete genome	562	cellular organisms; Bacteria; Proteobacteria; Gammaproteobacteria; Enterobacterales; Enterobacteriaceae; Escherichia; Escherichia coli	562	Escherichia coli
DTU_2024_1035964_100_SI_LVK_102_SE.fq.gz.output	GCF_008807135.1	24426	30198905	3562	160858	64.48	269.5	187.74	64.48	269.5	187.74	3.01882e+07	1e-26	NZ_CP041448.1	Escherichia coli strain YPE10 chromosome, complete genome	562	cellular organisms; Bacteria; Proteobacteria; Gammaproteobacteria; Enterobacterales; Enterobacteriaceae; Escherichia; Escherichia coli	562	Escherichia coli
DTU_2024_1035963_100_SI_LVK_98_SE.fq.gz.output	GCF_019428705.1	2178	25437362	4297	184405	59.08	212.06	137.94	59.08	212.06	137.94	2.54245e+07	1e-26	NZ_CP080139.1	Escherichia coli strain PK8241 chromosome, complete genome	562	cellular organisms; Bacteria; Proteobacteria; Gammaproteobacteria; Enterobacterales; Enterobacteriaceae; Escherichia; Escherichia coli	562	Escherichia coli
DTU_2024_1035962_100_SI_LVK_97_SE.fq.gz.output	GCF_000212715.2	7940	24133002	2334	172192	66.78	284.28	140.15	66.78	284.28	140.15	2.4126e+07	1e-26	NC_017641.1	Escherichia coli UMNK88, complete genome	696406	cellular organisms; Bacteria; Proteobacteria; Gammaproteobacteria; Enterobacterales; Enterobacteriaceae; Escherichia; Escherichia coli; Escherichia coli UMNK88	562	Escherichia coli
DTU_2024_1035961_100_SI_LVK_94_SE.fq.gz.output	GCF_000212715.2	7940	19496814	1864	172192	68.67	285.67	113.23	68.67	285.67	113.23	1.94912e+07	1e-26	NC_017641.1	Escherichia coli UMNK88, complete genome	696406	cellular organisms; Bacteria; Proteobacteria; Gammaproteobacteria; Enterobacterales; Enterobacteriaceae; Escherichia; Escherichia coli; Escherichia coli UMNK88	562	Escherichia coli
DTU_2024_1035960_100_SI_LVK_83_SE.fq.gz.output	GCF_008375335.1	11534	14279369	1385	158330	65.24	281.5	90.19	65.24	281.5	90.19	1.42752e+07	1e-26	NZ_CP041627.1	Escherichia coli strain ETEC6 chromosome, complete genome	562	cellular organisms; Bacteria; Proteobacteria; Gammaproteobacteria; Enterobacterales; Enterobacteriaceae; Escherichia; Escherichia coli	562	Escherichia coli
DTU_2024_1035959_100_SI_LVK_80_SE.fq.gz.output	GCF_003402955.1	1201	14758230	2337	171877	57.43	256.8	85.87	57.43	256.8	85.87	1.47512e+07	1e-26	NZ_CP031546.1	Escherichia coli strain cq9 chromosome, complete genome	562	cellular organisms; Bacteria; Proteobacteria; Gammaproteobacteria; Enterobacterales; Enterobacteriaceae; Escherichia; Escherichia coli	562	Escherichia coli
DTU_2024_1035958_100_SI_LVK_74_SE.fq.gz.output	GCF_003030025.1	2745	16629140	1929	158929	64.13	272.47	104.63	64.13	272.47	104.63	1.66234e+07	1e-26	NZ_CP028166.1	Escherichia coli strain CFSAN064036 chromosome, complete genome	562	cellular organisms; Bacteria; Proteobacteria; Gammaproteobacteria; Enterobacterales; Enterobacteriaceae; Escherichia; Escherichia coli	562	Escherichia coli
DTU_2024_1035957_100_SI_LVK_61_SE.fq.gz.output	GCF_002163655.1	14100	34181847	2338	160158	74.01	280.32	213.43	74.01	280.32	213.43	3.41748e+07	1e-26	NZ_CP018323.1	Escherichia coli strain KSC9 chromosome, complete genome	562	cellular organisms; Bacteria; Proteobacteria; Gammaproteobacteria; Enterobacterales; Enterobacteriaceae; Escherichia; Escherichia coli	562	Escherichia coli
DTU_2024_1035956_100_SI_LVK_60_SE.fq.gz.output	GCF_016403975.2	11777	24952141	2779	170343	64.91	263.65	146.48	64.91	263.65	146.48	2.49438e+07	1e-26	NZ_CP075649.1	Escherichia coli strain STEC17-190 chromosome, complete genome	562	cellular organisms; Bacteria; Proteobacteria; Gammaproteobacteria; Enterobacterales; Enterobacteriaceae; Escherichia; Escherichia coli	562	Escherichia coli
DTU_2024_1035955_100_SI_LVK_48_SE.fq.gz.output	GCF_014169595.1	7782	17643652	2138	158319	61.49	267.96	111.44	61.49	267.96	111.44	1.76372e+07	1e-26	NZ_AP022215.1	Escherichia coli strain WP8-S17-ESBL-05	562	cellular organisms; Bacteria; Proteobacteria; Gammaproteobacteria; Enterobacterales; Enterobacteriaceae; Escherichia; Escherichia coli	562	Escherichia coli
DTU_2024_1035954_100_SI_LVK_43_SE.fq.gz.output	GCF_015571535.1	15028	11811930	2400	164839	53.18	235.87	71.66	53.18	235.87	71.66	1.18047e+07	1e-26	NZ_CP062811.1	Escherichia coli strain Res13-Sevr-PER07-33 chromosome, complete genome	562	cellular organisms; Bacteria; Proteobacteria; Gammaproteobacteria; Enterobacterales; Enterobacteriaceae; Escherichia; Escherichia coli	562	Escherichia coli
DTU_2024_1035952_100_SI_LVK_11_SE.fq.gz.output	GCF_001971765.1	5856	22704320	3102	161000	58.7	265.72	141.02	58.7	265.72	141.02	2.2695e+07	1e-26	NZ_CP019359.1	Escherichia coli strain XH990 chromosome, complete genome	562	cellular organisms; Bacteria; Proteobacteria; Gammaproteobacteria; Enterobacterales; Enterobacteriaceae; Escherichia; Escherichia coli	562	Escherichia coli
DTU_2014_1035953_100_SI_LVK_17_SE.fq.gz.output	GCF_003030025.1	2745	26580998	2511	158929	67.6	272.86	167.25	67.6	272.86	167.25	2.65735e+07	1e-26	NZ_CP028166.1	Escherichia coli strain CFSAN064036 chromosome, complete genome	562	cellular organisms; Bacteria; Proteobacteria; Gammaproteobacteria; Enterobacterales; Enterobacteriaceae; Escherichia; Escherichia coli	562	Escherichia coli

## Sheet: Table_S3_E_coli
Name	Species	O-type	H-type	MLST	Serotype	Evidence	GeneScores	AlleleKeys	GeneIdentities(%)	GeneCoverages(%)	GeneContigNames	GeneRanges	GeneLengths	DatabaseVer	Warnings	Pathotype	PathotypeCounts	PathotypeGenes	PathotypeGeneNames	PathotypeAccessions	PathotypeAlleleIDs	PathotypeIdentities(%)	PathotypeCoverages(%)	PathotypeGeneLengthRatios	PathotypeRuleIDs	PathotypeGeneCounts	PathoDBVer	StxSubtypes	StxAccessions	StxAlleleIDs	StxAlleleNames	StxIdentities(%)	StxCoverages(%)	StxLengths	StxContigNames	StxCoordinates
DTU_2024_1035955_100_SI_LVK_48_SE.fq.gz_flye	Escherichia coli	O121	H10	641	O121:H10	Based on 3 allele(s)	wzx:1;wzy:1;fliC:1;	O121-1-wzx-origin;O121-3-wzy-origin;H10-25-fliC;	100;100;100;	100;100;100;	contig_10;contig_10;contig_10;	123214-124608;126060-127250;278934-280196;	1395;1191;1263;	v1.0 (11-03-2020)	-	STEC/EHEC	1	hlyA,hlyE,stx2	hlyA: plasmid hemolysin A - hlyA,hlyE: hemolysin E chromosomal,stx2: Shiga toxin 2 subtype e complete sequence (subunits A and B)	M14107.1;AVXX01000010.1;AJ567998	92;95;278	99.545;99.013;99.919	100;100;100	3075/3075;912/912;1236/1236	27:STEC:stx2	STEC:1 (stx2)	v2024-10-03	stx2e	AJ567998	278	Shiga toxin 2 subtype e complete sequence (subunits A and B)	99.919	100	1236	contig_10	214280-215515
DTU_2024_1035958_100_SI_LVK_74_SE.fq.gz_flye	Escherichia coli	O2	H32	10	O2:H32	Based on 3 allele(s)	wzx:1;wzy:0.996;fliC:1;	O2-7-wzx;O2-16-wzy;H32-2-fliC;	100;99.585;100;	100;100;100;	contig_1;contig_1;contig_24;	342190-343452;345164-346125;8192-9904;	1263;963;1713;	v1.0 (11-03-2020)	High similarity O-antigen group 7:O2/O50 as per A.Iguchi et.al (PMID: 25428893)	STEC/EHEC	1	hlyA,hlyE,stx2	hlyA: plasmid hemolysin A - hlyA,hlyE: hemolysin E chromosomal,stx2: Shiga toxin 2 subtype e complete sequence (subunits A and B)	M14107.1;AVXX01000010.1;M21534	92;95;268	99.545;97.7;100.0	100;100;100	3075/3075;913/912;1236/1236	27:STEC:stx2	STEC:1 (stx2)	v2024-10-03	stx2e	M21534	268	Shiga toxin 2 subtype e complete sequence (subunits A and B)	100	100	1236	contig_24	117032-118267
DTU_2024_1035966_100_SI_DTU_42C_SE.fq.gz_flye	Escherichia coli	O2	H32	10	O2:H32	Based on 3 allele(s)	wzx:1;wzy:0.999;fliC:1;	O2-7-wzx;O2-16-wzy;H32-2-fliC;	100;99.896;99.942;	100;100;100;	contig_9;contig_9;contig_31;	65210-66472;68184-69146;4087-5799;	1263;963;1713;	v1.0 (11-03-2020)	High similarity O-antigen group 7:O2/O50 as per A.Iguchi et.al (PMID: 25428893)	STEC/EHEC	1	hlyA,hlyE,stx2	hlyA: plasmid hemolysin A - hlyA,hlyE: hemolysin E chromosomal,stx2: Shiga toxin 2 subtype e complete sequence (subunits A and B)	M14107.1;AVXX01000010.1;M21534	92;95;268	99.545;97.7;100.0	100;100;100	3075/3075;913/912;1236/1236	27:STEC:stx2	STEC:1 (stx2)	v2024-10-03	stx2e	M21534	268	Shiga toxin 2 subtype e complete sequence (subunits A and B)	100	100	1236	contig_63	4880-6115
DTU_2014_1035953_100_SI_LVK_17_SE.fq.gz_flye	Escherichia coli	O2	H32	10	O2:H32	Based on 3 allele(s)	wzx:1;wzy:0.999;fliC:1;	O2-7-wzx;O2-16-wzy;H32-2-fliC;	100;99.896;99.942;	100;100;100;	contig_6;contig_6;contig_19;	1164053-1165315;1167027-1167989;61448-63160;	1263;963;1713;	v1.0 (11-03-2020)	High similarity O-antigen group 7:O2/O50 as per A.Iguchi et.al (PMID: 25428893)	ND	0	hlyA,hlyE	hlyA: plasmid hemolysin A - hlyA,hlyE: hemolysin E chromosomal	M14107.1;AVXX01000010.1	92;95	99.545;97.7	100;100	3075/3075;913/912	-	-	v2024-10-03	-	-	-	-	-	-	-	-	-
DTU_2024_1035952_100_SI_LVK_11_SE.fq.gz_flye	Escherichia coli	O15	H45	118	O15:H45	Based on 3 allele(s)	wzx:1;wzy:0.999;fliC:1;	O15-5-wzx;O15-8-wzy;H45-1-fliC-origin;	100;99.915;99.883;	100;100;100;	contig_1;contig_1;contig_1;	478347-479591;476136-477314;384263-385969;	1245;1179;1707;	v1.0 (11-03-2020)	-	ND	0	hlyA,hlyE	hlyA: plasmid hemolysin A - hlyA,hlyE: hemolysin E chromosomal	M14107.1;AVXX01000010.1	92;95	99.447;98.794	100;100	3075/3075;912/912	-	-	v2024-10-03	-	-	-	-	-	-	-	-	-
DTU_2024_1035957_100_SI_LVK_61_SE.fq.gz_flye	Escherichia coli	O11	H9	101	O11:H9	Based on 3 allele(s)	wzx:1;wzy:1;fliC:1;	O11-1-wzx-origin;O11-2-wzy-origin;H9-1-fliC-origin;	100;100;100;	100;100;100;	contig_22;contig_22;contig_3;	66293-67528;68259-69494;300555-302567;	1236;1236;2013;	v1.0 (11-03-2020)	-	ND	0	hlyA,hlyE	hlyA: chromosomal hemolysin A - hlyA,hlyE: hemolysin E chromosomal	M10133.1;AVXX01000010.1	91;95	99.317;98.904	100;100	3075/3072;912/912	-	-	v2024-10-03	-	-	-	-	-	-	-	-	-
DTU_2024_1035964_100_SI_LVK_102_SE.fq.gz_flye	Escherichia coli	O2	H32	3628	O2:H32	Based on 3 allele(s)	wzx:1;wzy:0.997;fliC:1;	O2-7-wzx;O2-16-wzy;H32-2-fliC;	100;99.688;100;	100;100;100;	contig_6;contig_6;contig_15;	82720-83982;80047-81008;447067-448779;	1263;963;1713;	v1.0 (11-03-2020)	High similarity O-antigen group 7:O2/O50 as per A.Iguchi et.al (PMID: 25428893)	ND	0	hlyA,hlyE	hlyA: plasmid hemolysin A - hlyA,hlyE: hemolysin E chromosomal	M14107.1;AVXX01000010.1	92;95	99.545;97.7	100;100	3075/3075;913/912	-	-	v2024-10-03	-	-	-	-	-	-	-	-	-
DTU_2024_1035976_100_SI_DTU_88A_SE.fq.gz_flye	Escherichia coli	O36	H19	10	O36:H19	Based on 3 allele(s)	wzx:0.998;wzy:0.998;fliC:0.98;	O36-3-wzx;O36-11-wzy;H19-4-fliC;	99.759;99.761;98.313;	100;100;100;	contig_1;contig_1;contig_1;	3066561-3067805;3069339-3070595;3180253-3182090;	1245;1257;1838;	v1.0 (11-03-2020)	-	ND	0	hlyA,hlyE	hlyA: plasmid hemolysin A - hlyA,hlyE: hemolysin E chromosomal	M14107.1;AVXX01000010.1	92;95	99.577;99.661	100;97	3075/3075;885/912	-	-	v2024-10-03	-	-	-	-	-	-	-	-	-
DTU_2024_1035977_100_SI_DTU_101B_SE.fq.gz_flye	Escherichia coli	-	H5	1161	-:H5	Based on 1 allele(s)	fliC:1;	H5-2-fliC-origin;	100;	100;	contig_1;	1404809-1406119;	1311;	v1.0 (11-03-2020)	-	ND	0	hlyA	hlyA: chromosomal hemolysin A - hlyA	M10133.1	91	99.317	100	3075/3072	-	-	v2024-10-03	-	-	-	-	-	-	-	-	-
DTU_2024_1035954_100_SI_LVK_43_SE.fq.gz_flye	Escherichia coli	O8/O35	H31	3524	O8/O35:H31	Based on 3 allele(s)	wzx:1;wzy:0.999;fliC:0.99;	O35-3-wzx;O35-5-wzy;H31-3-fliC;	100;99.902;99.101;	100;100;100;	contig_3;contig_3;contig_3;	32972-34177;37620-38642;188399-190066;	1206;1023;1668;	v1.0 (11-03-2020)	-	ETEC	1	hlyA,hlyE,sta1	hlyA: plasmid hemolysin A - hlyA,hlyE: hemolysin E chromosomal,sta1: heat-stable enterotoxin ST	M14107.1;AVXX01000010.1;AJ555214	92;95;129	99.415;98.794;100.0	100;100;100	3075/3075;912/912;219/219	20:ETEC:sta1	ETEC:1 (sta1)	v2024-10-03	-	-	-	-	-	-	-	-	-
DTU_2024_1035956_100_SI_LVK_60_SE.fq.gz_flye	Escherichia coli	O98	H10	641	O98:H10	Based on 3 allele(s)	wzx:0.999;wzy:0.998;fliC:1;	O98-3-wzx;O98-4-wzy;H10-25-fliC;	99.923;99.827;100;	100;100;100;	contig_7;contig_7;contig_7;	368747-370048;367579-368733;222990-224252;	1302;1155;1263;	v1.0 (11-03-2020)	-	ETEC	1	hlyA,hlyE,sta1	hlyA: plasmid hemolysin A - hlyA,hlyE: hemolysin E chromosomal,sta1: heat-stable enterotoxin ST	M14107.1;AVXX01000010.1;AJ555214	92;95;129	99.415;99.013;100.0	100;100;100	3075/3075;912/912;219/219	20:ETEC:sta1	ETEC:1 (sta1)	v2024-10-03	-	-	-	-	-	-	-	-	-
DTU_2024_1035959_100_SI_LVK_80_SE.fq.gz_flye	Escherichia coli	O182	H17	23	O182:H17	Based on 3 allele(s)	wzx:0.995;wzy:0.993;fliC:1;	O182-1-wzx-origin;O182-2-wzy-origin;H17-2-fliC-origin;	99.479;99.267;100;	100;100;100;	contig_20;contig_20;contig_22;	140079-141422;136577-137803;10800-11849;	1344;1227;1050;	v1.0 (11-03-2020)	-	ETEC	1	eltA,eltB,hlyA,hlyE,ltcA,stb	eltA: heat-labile enterotoxin LT subunit a; PMID: 18223074,eltB: heat-labile enterotoxin LT subunit b,hlyA: plasmid hemolysin A - hlyA,hlyE: hemolysin E chromosomal,ltcA: heat-labile enterotoxin LT,stb: heat-stabile enterotoxin ST	ABV01310.1;NC_014232.1;M14107.1;AVXX01000010.1;EU113243;AY028790	74;78;92;95;124;133	99.485;98.4;99.447;99.013;99.871;100.0	100;100;100;100;100;100	777/777;375/375;3075/3075;912/912;777/777;216/216	19:ETEC:ltcA;23:ETEC:stb;24:ETEC:eltA;25:ETEC:eltB	ETEC:4 (eltA,eltB,ltcA,stb)	v2024-10-03	-	-	-	-	-	-	-	-	-
DTU_2024_1035960_100_SI_LVK_83_SE.fq.gz_flye	Escherichia coli	O6	H16	48	O6:H16	Based on 3 allele(s)	wzx:1;wzy:0.999;fliC:1;	O6-1-wzx-origin;O6-7-wzy-origin;H16-25-fliC;	100;99.851;99.937;	100;100;100;	contig_2;contig_2;contig_2;	343283-344539;341940-343283;243397-244971;	1257;1344;1575;	v1.0 (11-03-2020)	-	ETEC	1	eltA,eltB,hlyA,hlyE,ltcA,sta1,stb	eltA: heat-labile enterotoxin LT subunit a; PMID: 18223074,eltB: heat-labile enterotoxin LT subunit b,hlyA: plasmid hemolysin A - hlyA,hlyE: hemolysin E chromosomal,ltcA: heat-labile enterotoxin LT,sta1: heat-stable enterotoxin ST,stb: heat-stabile enterotoxin ST	ABV01310.1;NC_014232.1;M14107.1;AVXX01000010.1;EU113243;AJ555214;CP000913	74;78;92;95;124;129;135	99.614;98.4;99.545;99.781;100.0;100.0;100.0	100;100;100;100;100;100;100	777/777;375/375;3075/3075;912/912;777/777;219/219;216/216	19:ETEC:ltcA;20:ETEC:sta1;23:ETEC:stb;24:ETEC:eltA;25:ETEC:eltB	ETEC:5 (eltA,eltB,ltcA,sta1,stb)	v2024-10-03	-	-	-	-	-	-	-	-	-
DTU_2024_1035961_100_SI_LVK_94_SE.fq.gz_flye	Escherichia coli	O149	H10	100	O149:H10	Based on 3 allele(s)	wzx:1;wzy:1;fliC:1;	O149-1-wzx-origin;O149-2-wzy-origin;H10-20-fliC;	100;100;100;	100;100;100;	contig_17;contig_17;contig_20;	712743-713927;714778-715842;386125-387387;	1185;1065;1263;	v1.0 (11-03-2020)	-	ETEC	1	hlyA,hlyE,stb	hlyA: plasmid hemolysin A - hlyA,hlyE: hemolysin E chromosomal,stb: heat-stabile enterotoxin ST	M14107.1;AVXX01000010.1;AY028790	92;95;133	99.252;97.59;100.0	100;100;100	3075/3075;913/912;216/216	23:ETEC:stb	ETEC:1 (stb)	v2024-10-03	-	-	-	-	-	-	-	-	-
DTU_2024_1035962_100_SI_LVK_97_SE.fq.gz_flye	Escherichia coli	O149	H10	100	O149:H10	Based on 3 allele(s)	wzx:1;wzy:1;fliC:1;	O149-1-wzx-origin;O149-2-wzy-origin;H10-20-fliC;	100;100;100;	100;100;100;	contig_40;contig_40;contig_40;	214054-215238;216089-217153;337341-338603;	1185;1065;1263;	v1.0 (11-03-2020)	-	ETEC	1	eltA,eltB,hlyA,hlyE,ltcA,stb	eltA: heat-labile enterotoxin LT subunit a; PMID: 18223074,eltB: heat-labile enterotoxin LT subunit b,hlyA: plasmid hemolysin A - hlyA,hlyE: hemolysin E chromosomal,ltcA: heat-labile enterotoxin LT,stb: heat-stabile enterotoxin ST	ABV01310.1;NC_014232.1;M14107.1;AVXX01000010.1;EU113243;AY028790	74;78;92;95;124;133	99.614;98.4;99.252;97.59;100.0;100.0	100;100;100;100;100;100	777/777;375/375;3075/3075;913/912;777/777;216/216	19:ETEC:ltcA;23:ETEC:stb;24:ETEC:eltA;25:ETEC:eltB	ETEC:4 (eltA,eltB,ltcA,stb)	v2024-10-03	-	-	-	-	-	-	-	-	-
DTU_2024_1035967_100_SI_DTU_48A_SE.fq.gz_flye	Escherichia coli	-	H37	772	-:H37	Based on 1 allele(s)	fliC:1;	H37-1-fliC-origin;	99.941;	100;	contig_9;	21157-22842;	1686;	v1.0 (11-03-2020)	-	ETEC	1	hlyA,hlyE,sta1,stb	hlyA: plasmid hemolysin A - hlyA,hlyE: hemolysin E chromosomal,sta1: heat-stable enterotoxin ST,stb: heat-stabile enterotoxin ST	M14107.1;AVXX01000010.1;AJ555214;CP000913	92;95;129;135	99.545;99.89;100.0;100.0	100;100;100;100	3075/3075;912/912;219/219;216/216	20:ETEC:sta1;23:ETEC:stb	ETEC:2 (sta1,stb)	v2024-10-03	-	-	-	-	-	-	-	-	-
DTU_2024_1035968_100_SI_DTU_52A_SE.fq.gz_flye	Escherichia coli	O8	H23	224	O8:H23	Based on 3 allele(s)	wzm:1;wzt:1;fliC:1;	O8-16-wzm;O8-32-wzt;H23-2-fliC;	100;100;99.943;	100;100;100;	contig_2;contig_2;contig_2;	363148-363942;363942-365156;501586-503352;	795;1215;1767;	v1.0 (11-03-2020)	-	ETEC	1	eltA,eltB,hlyA,hlyE,ltcA,stb	eltA: heat-labile enterotoxin LT subunit a; PMID: 18223074,eltB: heat-labile enterotoxin LT subunit b,hlyA: plasmid hemolysin A - hlyA,hlyE: hemolysin E chromosomal,ltcA: heat-labile enterotoxin LT,stb: heat-stabile enterotoxin ST	ABV01310.1;NC_014232.1;M14107.1;AVXX01000010.1;EU113243;AY028790	74;78;92;95;124;133	99.614;98.4;99.447;98.904;100.0;100.0	100;100;100;100;100;100	777/777;375/375;3075/3075;912/912;777/777;216/216	19:ETEC:ltcA;23:ETEC:stb;24:ETEC:eltA;25:ETEC:eltB	ETEC:4 (eltA,eltB,ltcA,stb)	v2024-10-03	-	-	-	-	-	-	-	-	-
DTU_2024_1035969_100_SI_DTU_56B_SE.fq.gz_flye	Escherichia coli	O8	H23	224	O8:H23	Based on 3 allele(s)	wzm:1;wzt:1;fliC:1;	O8-16-wzm;O8-32-wzt;H23-2-fliC;	100;100;99.943;	100;100;100;	contig_15;contig_15;contig_15;	228480-229274;227266-228480;89070-90836;	795;1215;1767;	v1.0 (11-03-2020)	-	ETEC	1	eltA,eltB,hlyA,hlyE,ltcA,stb	eltA: heat-labile enterotoxin LT subunit a; PMID: 18223074,eltB: heat-labile enterotoxin LT subunit b,hlyA: plasmid hemolysin A - hlyA,hlyE: hemolysin E chromosomal,ltcA: heat-labile enterotoxin LT,stb: heat-stabile enterotoxin ST	ABV01310.1;NC_014232.1;M14107.1;AVXX01000010.1;EU113243;AY028790	74;78;92;95;124;133	99.614;98.4;99.447;98.904;100.0;100.0	100;100;100;100;100;100	777/777;375/375;3075/3075;912/912;777/777;216/216	19:ETEC:ltcA;23:ETEC:stb;24:ETEC:eltA;25:ETEC:eltB	ETEC:4 (eltA,eltB,ltcA,stb)	v2024-10-03	-	-	-	-	-	-	-	-	-
DTU_2024_1035970_100_SI_DTU_60C_SE.fq.gz_flye	Escherichia coli	O98	H10	641	O98:H10	Based on 3 allele(s)	wzx:0.999;wzy:0.998;fliC:1;	O98-3-wzx;O98-4-wzy;H10-25-fliC;	99.923;99.827;99.921;	100;100;100;	contig_22;contig_22;contig_26;	281823-283124;283138-284292;99583-100845;	1302;1155;1263;	v1.0 (11-03-2020)	-	ETEC	1	hlyA,hlyE,sta1	hlyA: plasmid hemolysin A - hlyA,hlyE: hemolysin E chromosomal,sta1: heat-stable enterotoxin ST	M14107.1;AVXX01000010.1;AJ555214	92;95;129	99.415;99.013;100.0	100;100;100	3075/3075;912/912;219/219	20:ETEC:sta1	ETEC:1 (sta1)	v2024-10-03	-	-	-	-	-	-	-	-	-
DTU_2024_1035971_100_SI_DTU_76C_SE.fq.gz_flye	Escherichia coli	O8	H14	1090	O8:H14	Based on 3 allele(s)	wzm:1;wzt:0.994;fliC:0.97;	O8-10-wzm;O8-26-wzt;H14-5-fliC;	100;99.424;96.673;	100;100;100;	contig_2;contig_2;contig_2;	252153-252947;252947-254161;407612-409264;	795;1215;1653;	v1.0 (11-03-2020)	-	ETEC	1	hlyA,hlyE,sta1,stb	hlyA: plasmid hemolysin A - hlyA,hlyE: hemolysin E chromosomal,sta1: heat-stable enterotoxin ST,stb: heat-stabile enterotoxin ST	M14107.1;AVXX01000010.1;AJ555214;CP000913	92;95;129;135	99.415;98.575;100.0;100.0	100;100;100;100	3075/3075;912/912;219/219;216/216	20:ETEC:sta1;23:ETEC:stb	ETEC:2 (sta1,stb)	v2024-10-03	-	-	-	-	-	-	-	-	-
DTU_2024_1035973_100_SI_DTU_80C_SE.fq.gz_flye	Escherichia coli	-	H37	772	-:H37	Based on 1 allele(s)	fliC:1;	H37-1-fliC-origin;	99.941;	100;	contig_14;	99538-101223;	1686;	v1.0 (11-03-2020)	-	ETEC	1	hlyA,hlyE,sta1,stb	hlyA: plasmid hemolysin A - hlyA,hlyE: hemolysin E chromosomal,sta1: heat-stable enterotoxin ST,stb: heat-stabile enterotoxin ST	M14107.1;AVXX01000010.1;AJ555214;CP000913	92;95;129;135	99.545;99.89;100.0;100.0	100;100;100;100	3075/3075;912/912;219/219;216/216	20:ETEC:sta1;23:ETEC:stb	ETEC:2 (sta1,stb)	v2024-10-03	-	-	-	-	-	-	-	-	-
DTU_2024_1035974_100_SI_DTU_82A_SE.fq.gz_flye	Escherichia coli	O6	H16	48	O6:H16	Based on 3 allele(s)	wzx:1;wzy:0.999;fliC:1;	O6-1-wzx-origin;O6-7-wzy-origin;H16-25-fliC;	100;99.851;99.937;	100;100;100;	contig_3;contig_3;contig_3;	2274613-2275869;2273270-2274613;2174727-2176301;	1257;1344;1575;	v1.0 (11-03-2020)	-	ETEC	1	eltA,eltB,hlyA,hlyE,ltcA,sta1,stb	eltA: heat-labile enterotoxin LT subunit a; PMID: 18223074,eltB: heat-labile enterotoxin LT subunit b,hlyA: plasmid hemolysin A - hlyA,hlyE: hemolysin E chromosomal,ltcA: heat-labile enterotoxin LT,sta1: heat-stable enterotoxin ST,stb: heat-stabile enterotoxin ST	ABV01310.1;NC_014232.1;M14107.1;AVXX01000010.1;EU113243;AJ555214;CP000913	74;78;92;95;124;129;135	99.614;98.4;99.545;99.781;100.0;100.0;100.0	100;100;100;100;100;100;100	777/777;375/375;3075/3075;912/912;777/777;219/219;216/216	19:ETEC:ltcA;20:ETEC:sta1;23:ETEC:stb;24:ETEC:eltA;25:ETEC:eltB	ETEC:5 (eltA,eltB,ltcA,sta1,stb)	v2024-10-03	-	-	-	-	-	-	-	-	-
DTU_2024_1035975_100_SI_DTU_83A_SE.fq.gz_flye	Escherichia coli	O6	H16	48	O6:H16	Based on 3 allele(s)	wzx:1;wzy:0.999;fliC:1;	O6-1-wzx-origin;O6-7-wzy-origin;H16-25-fliC;	100;99.851;99.937;	100;100;100;	contig_4;contig_16;contig_16;	548392-549648;949249-950592;850706-852280;	1257;1344;1575;	v1.0 (11-03-2020)	-	ETEC	1	eltA,eltB,hlyA,hlyE,ltcA,sta1,stb	eltA: heat-labile enterotoxin LT subunit a; PMID: 18223074,eltB: heat-labile enterotoxin LT subunit b,hlyA: plasmid hemolysin A - hlyA,hlyE: hemolysin E chromosomal,ltcA: heat-labile enterotoxin LT,sta1: heat-stable enterotoxin ST,stb: heat-stabile enterotoxin ST	ABV01310.1;NC_014232.1;M14107.1;AVXX01000010.1;EU113243;AJ555214;CP000913	74;78;92;95;124;129;135	99.614;98.4;99.545;99.781;100.0;100.0;100.0	100;100;100;100;100;100;100	777/777;375/375;3075/3075;912/912;777/777;219/219;216/216	19:ETEC:ltcA;20:ETEC:sta1;23:ETEC:stb;24:ETEC:eltA;25:ETEC:eltB	ETEC:5 (eltA,eltB,ltcA,sta1,stb)	v2024-10-03	-	-	-	-	-	-	-	-	-
DTU_2024_1035963_100_SI_LVK_98_SE.fq.gz_flye	Escherichia coli	O84	H7	1029	O84:H7	Based on 3 allele(s)	wzx:1;wzy:1;fliC:1;	O84-3-wzx;O84-2-wzy-origin;H7-8-fliC-origin;	100;100;99.659;	100;100;100;	contig_12;contig_12;contig_40;	215389-216783;219451-220602;24706-26463;	1395;1152;1758;	v1.0 (11-03-2020)	-	EPEC	1	eae,hlyA,hlyE	eae: intimin,hlyA: plasmid hemolysin A - hlyA,hlyE: hemolysin E chromosomal	FM872418;M14107.1;AVXX01000010.1	71;92;95	99.679;99.512;97.59	100;100;100	2808/2808;3075/3075;913/912	16:EPEC:eae+!stx1+!stx2	EPEC:1 (eae)	v2024-10-03	-	-	-	-	-	-	-	-	-
DTU_2024_1035965_100_SI_LVK_103_SE.fq.gz_flye	Escherichia coli	O45	H9	7053	O45:H9	Based on 3 allele(s)	wzx:1;wzy:1;fliC:1;	O45-9-wzx;O45-15-wzy;H9-7-fliC;	100;100;99.95;	100;100;100;	contig_1;contig_1;contig_1;	2298462-2299721;2300684-2301832;2446002-2448014;	1260;1149;2013;	v1.0 (11-03-2020)	-	EPEC	1	eae,hlyA,hlyE	eae: intimin,hlyA: plasmid hemolysin A - hlyA,hlyE: hemolysin E chromosomal	QGG66503.1;M14107.1;AVXX01000010.1	28;92;95	99.929;99.447;99.123	100;100;100	2820/2820;3075/3075;912/912	16:EPEC:eae+!stx1+!stx2	EPEC:1 (eae)	v2024-10-03	-	-	-	-	-	-	-	-	-
DTU_2024_1035972_100_SI_DTU_79A_SE.fq.gz_flye	Escherichia coli	O51	H49	20	O51:H49	Based on 3 allele(s)	wzx:1;wzy:1;fliC:1;	O51-1-wzx-origin;O51-2-wzy-origin;H49-6-fliC;	100;100;99.941;	100;100;100;	contig_5;contig_5;contig_5;	361831-363390;364266-365303;549003-550697;	1560;1038;1695;	v1.0 (11-03-2020)	-	EPEC	1	eae,hlyA,hlyE	eae: intimin,hlyA: plasmid hemolysin A - hlyA,hlyE: hemolysin E chromosomal	QGG66503.1;M14107.1;AVXX01000010.1	28;92;95	100.0;99.545;99.013	100;100;100	2820/2820;3075/3075;912/912	16:EPEC:eae+!stx1+!stx2	EPEC:1 (eae)	v2024-10-03	-	-	-	-	-	-	-	-	-

## Sheet: Table_S3_C_perfringens
Assembly	MLST	ST type	Toxinotype
DTU_2024_1035979_100_SI_CP_11D_SE.fq.gz_flye.fasta	cperfringens (pubMLST)	850	cpb2, plc
DTU_2024_1035986_100_SI_CP_43C_SE.fq.gz_flye.fasta	cperfringens (pubMLST)	850	cpb2, plc
DTU_2024_1035989_100_SI_CP_52B_SE.fq.gz_flye.fasta	cperfringens (pubMLST)	ND	cpb2, plc
DTU_2024_1035991_100_SI_CP_60B_SE.fq.gz_flye.fasta	cperfringens (pubMLST)	850	cpb2, plc
DTU_2024_1035992_100_SI_CP_61B_SE.fq.gz_flye.fasta	cperfringens (pubMLST)	878	plc
DTU_2024_1035995_100_SI_CP_83B_SE.fq.gz_flye.fasta	cperfringens (pubMLST)	39	cpb2, plc
DTU_2024_1035997_100_SI_CP_94C_SE.fq.gz_flye.fasta	cperfringens (pubMLST)	850	cpb2, plc
DTU_2024_1035998_100_SI_CP_97A_SE.fq.gz_flye.fasta	cperfringens (pubMLST)	ND	cpb2, plc
DTU_2024_1036000_100_SI_CP_102A_SE.fq.gz_flye.fasta	cperfringens (pubMLST)	39	cpb2, plc

## Sheet: Table_S4_pairwise_snp_matrix_EC
Strain ID	LVK_17	LVK_11	LVK_43	LVK_48	LVK_60	LVK_61	LVK_74	LVK_80	LVK_83	LVK_94	LVK_97	LVK_98	LVK_102	LVK_103	DTU_42C	DTU_48A	DTU_52A	DTU_56B	DTU_60C	DTU_76C	DTU_79A	DTU_80C	DTU_82A	DTU_83A	DTU_88A	DTU_101B
LVK_17	0	34350	34771	27872	28651	28277	926	26556	12164	16612	16565	24998	1287	33630	360	11862	28178	28229	28774	44352	29022	11863	12181	12147	11580	47371
LVK_11	34350	0	27076	37361	37972	37011	34850	37381	35340	35869	35805	37013	34865	33103	34773	35276	37112	37181	38009	49879	37796	35217	35332	35337	34351	54577
LVK_43	34771	27076	0	39470	40130	39766	35411	39315	35983	36616	36491	37998	35424	33254	35333	35954	39427	39474	40244	50903	40192	35852	35974	35966	34999	56001
LVK_48	27872	37361	39470	0	5388	16438	28141	21294	28190	28588	28564	30035	28218	37874	28160	28309	18493	18614	5422	48506	18349	28210	28220	28188	27782	53049
LVK_60	28651	37972	40130	5388	0	17336	29144	21807	29341	29483	29452	31133	29199	39411	29091	29054	19726	19847	845	49826	18409	29012	29371	29345	28743	54178
LVK_61	28277	37011	39766	16438	17336	0	28704	21478	28581	29025	29048	30246	28807	38684	28703	28479	17761	17829	17116	49204	18205	28416	28607	28579	28223	53824
LVK_74	926	34850	35411	28141	29144	28704	0	27192	12448	17061	17002	25628	1426	34299	1043	12153	28782	28839	29242	45339	29562	12048	12464	12430	11676	48375
LVK_80	26556	37381	39315	21294	21807	21478	27192	0	27550	28050	28086	30021	27264	37932	27144	26731	23358	23418	21497	49314	22461	26837	27576	27568	26844	53513
LVK_83	12164	35340	35983	28190	29341	28581	12448	27550	0	16809	16830	25419	12405	34734	12383	7807	28664	28678	29024	44818	29580	7684	50	120	12685	48263
LVK_94	16612	35869	36616	28588	29483	29025	17061	28050	16809	0	711	26927	17285	35858	17064	16088	29361	29447	29445	46601	29799	15970	16896	16869	16590	50182
LVK_97	16565	35805	36491	28564	29452	29048	17002	28086	16830	711	0	26914	17252	35820	17036	16317	29423	29508	29465	46584	29776	16215	16962	16935	16581	50146
LVK_98	24998	37013	37998	30035	31133	30246	25628	30021	25419	26927	26914	0	25672	37159	25589	25571	29956	29985	31006	48907	31019	25494	25730	25728	24950	53035
LVK_102	1287	34865	35424	28218	29199	28807	1426	27264	12405	17285	17252	25672	0	34312	1388	12292	28868	28921	29284	45398	29497	12193	12527	12493	11686	48433
LVK_103	33630	33103	33254	37874	39411	38684	34299	37932	34734	35858	35820	37159	34312	0	34291	34838	38604	38642	39386	50686	39396	34704	34980	34958	33651	55536
DTU_42C	360	34773	35333	28160	29091	28703	1043	27144	12383	17064	17036	25589	1388	34291	0	12174	28604	28659	29060	45105	29369	12060	12500	12466	11647	48121
DTU_48A	11862	35276	35954	28309	29054	28479	12153	26731	7807	16088	16317	25571	12292	34838	12174	0	28901	28845	28906	44984	29304	453	7801	7904	10953	48330
DTU_52A	28178	37112	39427	18493	19726	17761	28782	23358	28664	29361	29423	29956	28868	38604	28604	28901	0	462	19671	49423	20319	28917	29070	29036	28579	54191
DTU_56B	28229	37181	39474	18614	19847	17829	28839	23418	28678	29447	29508	29985	28921	38642	28659	28845	462	0	19725	49370	20394	28839	29050	29038	28487	54068
DTU_60C	28774	38009	40244	5422	845	17116	29242	21497	29024	29445	29465	31006	29284	39386	29060	28906	19671	19725	0	49816	18366	28999	29381	29355	28771	54082
DTU_76C	44352	49879	50903	48506	49826	49204	45339	49314	44818	46601	46584	48907	45398	50686	45105	44984	49423	49370	49816	0	49701	45056	45244	45208	43562	55887
DTU_79A	29022	37796	40192	18349	18409	18205	29562	22461	29580	29799	29776	31019	29497	39396	29369	29304	20319	20394	18366	49701	0	29440	29977	29957	28613	53771
DTU_80C	11863	35217	35852	28210	29012	28416	12048	26837	7684	15970	16215	25494	12193	34704	12060	453	28917	28839	28999	45056	29440	0	7728	7831	10925	48482
DTU_82A	12181	35332	35974	28220	29371	28607	12464	27576	50	16896	16962	25730	12527	34980	12500	7801	29070	29050	29381	45244	29977	7728	0	117	12668	48708
DTU_83A	12147	35337	35966	28188	29345	28579	12430	27568	120	16869	16935	25728	12493	34958	12466	7904	29036	29038	29355	45208	29957	7831	117	0	12626	48673
DTU_88A	11580	34351	34999	27782	28743	28223	11676	26844	12685	16590	16581	24950	11686	33651	11647	10953	28579	28487	28771	43562	28613	10925	12668	12626	0	45775
DTU_101B	47371	54577	56001	53049	54178	53824	48375	53513	48263	50182	50146	53035	48433	55536	48121	48330	54191	54068	54082	55887	53771	48482	48708	48673	45775	0

## Sheet: Table_S4_pairwise_snp_matrix_CP
	CP_11D	CP_43C	CP_52B	CP_60B	CP_61B	CP_83B	CP_94C	CP_97A	CP_102A
CP_11D	0	2947	3426	2669	22397	4425	2932	5047	3945
CP_43C	2947	0	2897	2072	24854	3587	2355	4261	3258
CP_52B	3426	2897	0	1876	24215	3782	2226	4547	3390
CP_60B	2669	2072	1876	0	24946	3635	1517	4398	3063
CP_61B	22397	24854	24215	24946	0	24515	24771	24126	24629
CP_83B	4425	3587	3782	3635	24515	0	3506	4734	4114
CP_94C	2932	2355	2226	1517	24771	3506	0	4246	3151
CP_97A	5047	4261	4547	4398	24126	4734	4246	0	4230
CP_102A	3945	3258	3390	3063	24629	4114	3151	4230	0

## Sheet: Table_S5_Escherichia coli VF co
# refSequence	DTU_2024_1035954_100_SI_LVK_43.mapstat	DTU_2024_1035956_100_SI_LVK_60.mapstat	DTU_2024_1035959_100_SI_LVK_80.mapstat	DTU_2024_1035960_100_SI_LVK_83.mapstat	DTU_2024_1035961_100_SI_LVK_94.mapstat	DTU_2024_1035962_100_SI_LVK_97.mapstat	DTU_2024_1035967_100_SI_DTU_48A.mapstat	DTU_2024_1035968_100_SI_DTU_52A.mapstat	DTU_2024_1035969_100_SI_DTU_56B.mapstat	DTU_2024_1035970_100_SI_DTU_60C.mapstat	DTU_2024_1035971_100_SI_DTU_76C.mapstat	DTU_2024_1035973_100_SI_DTU_80C.mapstat	DTU_2024_1035974_100_SI_DTU_82A.mapstat	DTU_2024_1035975_100_SI_DTU_83A.mapstat	DTU_2024_1035955_100_SI_LVK_48.mapstat	DTU_2024_1035958_100_SI_LVK_74.mapstat	DTU_2024_1035966_100_SI_DTU_42C.mapstat	DTU_2024_1035963_100_SI_LVK_98.mapstat	DTU_2024_1035965_100_SI_LVK_103.mapstat	DTU_2024_1035972_100_SI_DTU_79A.mapstat	DTU_2014_1035953_100_SI_LVK_17.mapstat	DTU_2024_1035952_100_SI_LVK_11.mapstat	DTU_2024_1035957_100_SI_LVK_61.mapstat	DTU_2024_1035964_100_SI_LVK_102.mapstat	DTU_2024_1035976_100_SI_DTU_88A.mapstat	DTU_2024_1035977_100_SI_DTU_101B.mapstat
VFG000475(gb|NP_460201) (phoP) response regulator in two-component regulatory system with PhoQ [PhoPQ (VF0111) - Regulation (VFC0301)] [Salmonella enterica subsp. enterica serovar Typhimurium str. LT2]		0.997037						0.997037		0.988148	0.997037											1.00148	1.00741
VFG000477(gb|NP_461845) (rpoS) RNA polymerase sigma factor RpoS [RpoS (VF0112) - Regulation (VFC0301)] [Salmonella enterica subsp. enterica serovar Typhimurium str. LT2]	1	1	1	1	1	1	1	1	1	1	1	1	1	1	1	1	1	1	1	1	1	1	1	1	1	1
VFG000478(gb|NP_459678) (fur) ferric iron uptake transcriptional regulator [Fur (VF0113) - Regulation (VFC0301)] [Salmonella enterica subsp. enterica serovar Typhimurium str. LT2]	0.986755	0.986755	0.986755	0.986755	0.986755	0.986755	0.986755	0.986755	0.986755	0.986755	0.986755	0.986755	0.986755	0.986755	0.986755	0.986755	0.986755	0.986755	0.986755	0.986755	0.986755	0.986755	0.986755	0.986755	0.986755	0.986755
VFG000710(gb|AAC38364) (AAC38364) Orf1 [Ler (VF0189) - Regulation (VFC0301)] [Escherichia coli O127:H6 str. E2348/69]																		1
VFG004063(gb|WP_001537766) (phoP) two-component system response regulator PhoP [PhoPQ (VF0111) - Regulation (VFC0301)] [Salmonella enterica subsp. enterica serovar Paratyphi A str. ATCC 9150]	1	1	1	1	1	1	1	1	1	1		1	1	1	1	1	1	1	1	1	1	1	1	1	1	1
VFG033708(gb|WP_001365456) (ler) transcription regulator Ler [Ler (VF0192) - Regulation (VFC0301)] [Escherichia coli O103:H2 str. 12009]																			1	1
VFG049010(gb|WP_004103995) (rcsB) transcriptional regulator RcsB [RcsAB (VF0571) - Regulation (VFC0301)] [Klebsiella oxytoca E718]				0.993856	1.00768	0.995392			1.00768					0.993856			1.01229									1.00307
VFG049013(gb|WP_004201684) (rcsB) transcriptional regulator RcsB [RcsAB (VF0571) - Regulation (VFC0301)] [Klebsiella pneumoniae 342]	1	1	1	1	1	1	1	1	1	1	1	1	1	1	1	1	1	1	1	1	1	1	1	1	1	1
VFG049014(gb|YP_005228004) (rcsB) transcriptional regulator RcsB [RcsAB (VF0571) - Regulation (VFC0301)] [Klebsiella pneumoniae subsp. pneumoniae HS11286]											1.00154								0.993856					0.978495
VFG052339(gb|NP_463156.1) (pmrB) sensory kinase PmrB [PmrAB (VF1355) - Regulation (VFC0301)] [Salmonella enterica subsp. enterica serovar Typhimurium str. LT2]	0.999066	1.00187	1.00187	0.999066	0.999066	0.999066	0.999066	1.00187	1.00187	1.00187	0.999066	0.999066	0.999066	0.999066	1.00187	0.999066	0.999066	0.999066	0.999066	1.00187	0.999066	0.999066	1.00187	0.999066	0.999066	0.999066
VFG052340(gb|NP_463157.1) (pmrA) response regulator PmrA [PmrAB (VF1355) - Regulation (VFC0301)] [Salmonella enterica subsp. enterica serovar Typhimurium str. LT2]	1		1	1	1	1	1	1	1		1	1	1	1		1	1	1	1		1	1	1	1	1	1
VFG000876(gb|WP_000120946) (fimD) Outer membrane usher protein fimD precursor [Type 1 fimbriae (VF0221) - Adherence (VFC0001)] [Escherichia coli CFT073]																										1
VFG000878(gb|WP_000872015) (fimG) FimG protein precursor [Type 1 fimbriae (VF0221) - Adherence (VFC0001)] [Escherichia coli CFT073]																										1
VFG000910(gb|WP_000703304) (focI) Putative minor F1C fimbrial subunit precursor [F1C fimbriae (VF0224) - Adherence (VFC0001)] [Escherichia coli CFT073]																										1
VFG000914(gb|WP_000767894) (focG) F1C minor fimbrial subunit protein G presursor [F1C fimbriae (VF0224) - Adherence (VFC0001)] [Escherichia coli CFT073]																										1
VFG000915(gb|WP_001234179) (focH) F1C Putative fimbrial adhesin precursor [F1C fimbriae (VF0224) - Adherence (VFC0001)] [Escherichia coli CFT073]																										1
VFG001713(gb|WP_001298062) (papX) PapX protein regulates flagellum synthesis to repress motility [P fimbriae (VF0220) - Adherence (VFC0001)] [Escherichia coli CFT073]																							1			1
VFG001731(gb|WP_001223352) (iha) bifunctional siderophore receptor/adhesin Iha [C3610 (VF1157) - Adherence (VFC0001)] [Escherichia coli CFT073]		1	1	1	1	1		1	1	1			1	1
VFG002413(gb|WP_000389022) (ykgK/ecpR) regulator protein EcpR [ECP (VF0404) - Adherence (VFC0001)] [Escherichia coli O157:H7 str. EDL933]	1																		1			1
VFG002415(gb|WP_001131063) (yagX/ecpC) E. coli common pilus usher EcpC [ECP (VF0404) - Adherence (VFC0001)] [Escherichia coli O157:H7 str. EDL933]	1																		1			1
VFG002416(gb|WP_001265657) (yagW/ecpD) polymerized tip adhesin of ECP fibers [ECP (VF0404) - Adherence (VFC0001)] [Escherichia coli O157:H7 str. EDL933]																						1
VFG012213(gb|WP_000758687) (papG) P pilus tip adhesin PapG [P fimbriae (VF0220) - Adherence (VFC0001)] [Escherichia coli APEC O1]																						1
VFG012217(gb|WP_000620430) (papF) P pilus minor subunit PapF [P fimbriae (VF0220) - Adherence (VFC0001)] [Escherichia coli UTI89]																							1
VFG012218(gb|WP_000620429) (papF) P pilus minor subunit PapF [P fimbriae (VF0220) - Adherence (VFC0001)] [Escherichia coli APEC O1]																						1
VFG012223(gb|WP_000723802) (papE) P pilus minor subunit PapE [P fimbriae (VF0220) - Adherence (VFC0001)] [Escherichia coli APEC O1]																						1	1
VFG012233(gb|WP_000261303) (papJ) P pilus assembly protein PapJ [P fimbriae (VF0220) - Adherence (VFC0001)] [Escherichia coli APEC O1]																						1
VFG012237(gb|WP_000265730) (papD) chaperone protein PapD [P fimbriae (VF0220) - Adherence (VFC0001)] [Escherichia coli UTI89]																						1	1
VFG012248(gb|WP_001350743) (papH) P pilus termination subunit PapH [P fimbriae (VF0220) - Adherence (VFC0001)] [Escherichia coli APEC O1]																						0.998299	1			1
VFG012253(gb|WP_000597759) (papA) P pilus major subunit PapA [P fimbriae (VF0220) - Adherence (VFC0001)] [Escherichia coli APEC O1]																						0.959927	1			1
VFG012263(gb|NP_418732) (fimB) Type 1 fimbriae Regulatory protein fimB [Type 1 fimbriae (VF0221) - Adherence (VFC0001)] [Escherichia coli str. K-12 substr. MG1655]																		1
VFG012278(gb|WP_000695554) (fimA) Type-1 fimbrial protein, A chain precursor [Type 1 fimbriae (VF0221) - Adherence (VFC0001)] [Escherichia coli O157:H7 str. EDL933]																		1
VFG012281(gb|WP_000695567) (fimA) Type-1 fimbrial protein, A chain precursor [Type 1 fimbriae (VF0221) - Adherence (VFC0001)] [Escherichia coli 536]	1																					1	1			1.01093
VFG012286(gb|NP_313301) (fimI) Fimbrin-like protein fimI precursor [Type 1 fimbriae (VF0221) - Adherence (VFC0001)] [Escherichia coli O157:H7 str. Sakai]															1
VFG012305(gb|NP_418738) (fimF) FimF protein precursor [Type 1 fimbriae (VF0221) - Adherence (VFC0001)] [Escherichia coli str. K-12 substr. MG1655]								1	1		1								1			1
VFG012306(gb|WP_001244826) (fimF) FimF protein precursor [Type 1 fimbriae (VF0221) - Adherence (VFC0001)] [Escherichia coli O157:H7 str. EDL933]				1									1	1
VFG012309(gb|WP_001244830) (fimF) FimF protein precursor [Type 1 fimbriae (VF0221) - Adherence (VFC0001)] [Escherichia coli 536]																										1
VFG012312(gb|NP_418739) (fimG) FimG protein precursor [Type 1 fimbriae (VF0221) - Adherence (VFC0001)] [Escherichia coli str. K-12 substr. MG1655]								1	1
VFG012313(gb|WP_000872005) (fimG) FimG protein precursor [Type 1 fimbriae (VF0221) - Adherence (VFC0001)] [Escherichia coli O157:H7 str. EDL933]	1																		1			1
VFG012317(gb|WP_000870578) (fimG) FimG protein precursor [Type 1 fimbriae (VF0221) - Adherence (VFC0001)] [Escherichia coli UTI89]											1
VFG012319(gb|NP_418740) (fimH) FimH protein precursor [Type 1 fimbriae (VF0221) - Adherence (VFC0001)] [Escherichia coli str. K-12 substr. MG1655]																									1
VFG012326(gb|WP_152851977) (sfaC) S fimbrial switch regulatory protein SfaC [S fimbriae (VF0222) - Adherence (VFC0001)] [Escherichia coli 536]																										1
VFG012334(gb|WP_000975446) (sfaE) S fimbriae periplasmic chaperone SfaE [S fimbriae (VF0222) - Adherence (VFC0001)] [Escherichia coli 536]																										1
VFG012337(gb|WP_001370792) (sfaF) S fimbriae outer membrane usher SfaF [S fimbriae (VF0222) - Adherence (VFC0001)] [Escherichia coli UTI89]																										0.993539
VFG012339(gb|WP_000237768) (sfaG) S fimbriae minor subunit SfaG [S fimbriae (VF0222) - Adherence (VFC0001)] [Escherichia coli UTI89]																										1
VFG018191(gb|NP_414828) (ykgK/ecpR) regulator protein EcpR [ECP (VF0404) - Adherence (VFC0001)] [Escherichia coli str. K-12 substr. MG1655]							1					0.94247		0.988156		1					0.954315
VFG018194(gb|WP_000389022) (ykgK/ecpR) regulator protein EcpR [ECP (VF0404) - Adherence (VFC0001)] [Escherichia coli CFT073]																										1
VFG018198(gb|NP_414827) (yagZ/ecpA) E. coli common pilus structural subunit EcpA [ECP (VF0404) - Adherence (VFC0001)] [Escherichia coli str. K-12 substr. MG1655]		1		1	1	1				1			1	1		1	1		0.908163		1		1	1
VFG018205(gb|NP_414826) (yagY/ecpB) E. coli common pilus chaperone EcpB [ECP (VF0404) - Adherence (VFC0001)] [Escherichia coli str. K-12 substr. MG1655]				1				1	1				1	1		1	1				1		1	1
VFG018208(gb|WP_000716404) (yagY/ecpB) E. coli common pilus chaperone EcpB [ECP (VF0404) - Adherence (VFC0001)] [Escherichia coli 536]																										1
VFG018211(gb|NP_414825) (yagX/ecpC) E. coli common pilus usher EcpC [ECP (VF0404) - Adherence (VFC0001)] [Escherichia coli str. K-12 substr. MG1655]				1	1	1							1	1		1	1	1			1			1
VFG018214(gb|WP_001131117) (yagX/ecpC) E. coli common pilus usher EcpC [ECP (VF0404) - Adherence (VFC0001)] [Escherichia coli CFT073]																										1
VFG018218(gb|NP_414824) (yagW/ecpD) polymerized tip adhesin of ECP fibers [ECP (VF0404) - Adherence (VFC0001)] [Escherichia coli str. K-12 substr. MG1655]				1									1	1		1	1	1			1			1
VFG018225(gb|NP_414823) (yagV/ecpE) E. coli common pilus chaperone EcpE [ECP (VF0404) - Adherence (VFC0001)] [Escherichia coli str. K-12 substr. MG1655]	1			1									1	1		1	1				1			1
VFG018228(gb|WP_001295798) (yagV/ecpE) E. coli common pilus chaperone EcpE [ECP (VF0404) - Adherence (VFC0001)] [Escherichia coli CFT073]																										1
VFG033071(gb|WP_001815900) (paa) outer membrane adhesin Paa [Paa (VF0194) - Adherence (VFC0001)] [Escherichia coli O103:H2 str. 12009]						1												1
VFG033078(gb|WP_001447126) (papX) PapX protein regulates flagellum synthesis to repress motility [P fimbriae (VF0220) - Adherence (VFC0001)] [Escherichia coli O7:K1 str. IAI39]																										1
VFG033086(gb|WP_001304641) (papG) P pilus tip adhesin PapG [P fimbriae (VF0220) - Adherence (VFC0001)] [Escherichia coli ABU 83972]																							1			1
VFG033093(gb|WP_000620426) (papF) P pilus minor subunit PapF [P fimbriae (VF0220) - Adherence (VFC0001)] [Escherichia coli ABU 83972]																										1
VFG033101(gb|WP_001304639) (papE) P pilus minor subunit PapE [P fimbriae (VF0220) - Adherence (VFC0001)] [Escherichia coli ABU 83972]																										1
VFG033109(gb|WP_000597716) (papK) P pilus minor subunit PapK [P fimbriae (VF0220) - Adherence (VFC0001)] [Escherichia coli ABU 83972]																										1
VFG033110(gb|WP_000597719) (papK) P pilus minor subunit PapK [P fimbriae (VF0220) - Adherence (VFC0001)] [Escherichia coli NA114]																							1
VFG033111(gb|WP_000597712) (papK) P pilus minor subunit PapK [P fimbriae (VF0220) - Adherence (VFC0001)] [Escherichia coli O17:K52:H18 str. UMN026]																						1
VFG033116(gb|WP_000261306) (papJ) P pilus assembly protein PapJ [P fimbriae (VF0220) - Adherence (VFC0001)] [Escherichia coli ABU 83972]																							1			1
VFG033121(gb|WP_000265730) (papD) chaperone protein PapD [P fimbriae (VF0220) - Adherence (VFC0001)] [Escherichia coli ABU 83972]																										1
VFG033128(gb|WP_000654939) (papC) usher protein PapC [P fimbriae (VF0220) - Adherence (VFC0001)] [Escherichia coli ABU 83972]																										1
VFG033129(gb|WP_000654941) (papC) usher protein PapC [P fimbriae (VF0220) - Adherence (VFC0001)] [Escherichia coli NA114]																							1
VFG033131(gb|WP_000654934) (papC) usher protein PapC [P fimbriae (VF0220) - Adherence (VFC0001)] [Escherichia coli O45:K1:H7 str. S88]																						1
VFG033149(gb|WP_000930062) (papB) regulatory protein PapB [P fimbriae (VF0220) - Adherence (VFC0001)] [Escherichia coli ABU 83972]																							1			1
VFG033154(gb|WP_000006211) (papI) regulatory protein PapI [P fimbriae (VF0220) - Adherence (VFC0001)] [Escherichia coli ABU 83972]																							1			1
VFG033158(gb|WP_000006207) (papI) regulatory protein PapI [P fimbriae (VF0220) - Adherence (VFC0001)] [Escherichia coli O45:K1:H7 str. S88]																						1.00427
VFG033163(gb|WP_000790583) (fimB) Type 1 fimbriae Regulatory protein fimB [Type 1 fimbriae (VF0221) - Adherence (VFC0001)] [Escherichia coli O55:H7 str. CB9615]											1
VFG033168(gb|WP_000790583) (fimB) Type 1 fimbriae Regulatory protein fimB [Type 1 fimbriae (VF0221) - Adherence (VFC0001)] [Escherichia coli O103:H2 str. 12009]		1						1	1	1												1	1
VFG033170(gb|WP_000790583) (fimB) Type 1 fimbriae Regulatory protein fimB [Type 1 fimbriae (VF0221) - Adherence (VFC0001)] [Escherichia coli O26:H11 str. 11368]	1						1					1					1				1			1
VFG033175(gb|WP_000790583) (fimB) Type 1 fimbriae Regulatory protein fimB [Type 1 fimbriae (VF0221) - Adherence (VFC0001)] [Escherichia coli O78:H11:K80 str. H10407]			1	1									1	1					1
VFG033181(gb|WP_000790574) (fimB) Type 1 fimbriae Regulatory protein fimB [Type 1 fimbriae (VF0221) - Adherence (VFC0001)] [Escherichia coli O83:H1 str. LF82]																										1
VFG033189(gb|WP_000044711) (fimE) Type 1 fimbriae Regulatory protein fimE [Type 1 fimbriae (VF0221) - Adherence (VFC0001)] [Escherichia coli O103:H2 str. 12009]		1								1	1							1	1							1
VFG033190(gb|WP_000044711) (fimE) Type 1 fimbriae Regulatory protein fimE [Type 1 fimbriae (VF0221) - Adherence (VFC0001)] [Escherichia coli O111:H- str. 11128]								1	1														1
VFG033191(gb|WP_000044711) (fimE) Type 1 fimbriae Regulatory protein fimE [Type 1 fimbriae (VF0221) - Adherence (VFC0001)] [Escherichia coli O26:H11 str. 11368]																	1				1			1
VFG033194(gb|WP_000044711) (fimE) Type 1 fimbriae Regulatory protein fimE [Type 1 fimbriae (VF0221) - Adherence (VFC0001)] [Escherichia coli NA114]																						1
VFG033196(gb|WP_000044700) (fimE) Type 1 fimbriae Regulatory protein fimE [Type 1 fimbriae (VF0221) - Adherence (VFC0001)] [Escherichia coli O78:H11:K80 str. H10407]	1
VFG033197(gb|WP_000044711) (fimE) Type 1 fimbriae Regulatory protein fimE [Type 1 fimbriae (VF0221) - Adherence (VFC0001)] [Escherichia coli O45:K1:H7 str. S88]			1	1			1					1	1	1
VFG033210(gb|WP_000695546) (fimA) Type-1 fimbrial protein, A chain precursor [Type 1 fimbriae (VF0221) - Adherence (VFC0001)] [Escherichia coli O103:H2 str. 12009]		1								1
VFG033212(gb|WP_000695546) (fimA) Type-1 fimbrial protein, A chain precursor [Type 1 fimbriae (VF0221) - Adherence (VFC0001)] [Escherichia coli O26:H11 str. 11368]																0.961749	1				1			1
VFG033215(gb|WP_000695543) (fimA) Type-1 fimbrial protein, A chain precursor [Type 1 fimbriae (VF0221) - Adherence (VFC0001)] [Escherichia coli NA114]																			1
VFG033218(gb|WP_000695589) (fimA) Type-1 fimbrial protein, A chain precursor [Type 1 fimbriae (VF0221) - Adherence (VFC0001)] [Escherichia coli O45:K1:H7 str. S88]			1	1			1					1	1	1
VFG033221(gb|WP_000695562) (fimA) Type-1 fimbrial protein, A chain precursor [Type 1 fimbriae (VF0221) - Adherence (VFC0001)] [Escherichia coli O78:H18 str. WS3294A]	1.00182							1	1		1											0.98725	1			1.01275
VFG033226(gb|WP_000824114) (fimI) Fimbrin-like protein fimI precursor [Type 1 fimbriae (VF0221) - Adherence (VFC0001)] [Escherichia coli O55:H7 str. CB9615]	1	1		1				1	1	1			1	1				1
VFG033233(gb|WP_000824105) (fimI) Fimbrin-like protein fimI precursor [Type 1 fimbriae (VF0221) - Adherence (VFC0001)] [Escherichia coli O26:H11 str. 11368]																0.998148	0.998148				0.998148			0.998148
VFG033234(gb|WP_000756356) (fimI) Fimbrin-like protein fimI precursor [Type 1 fimbriae (VF0221) - Adherence (VFC0001)] [Escherichia coli O104:H4 str. 2009EL-2050]																				1			1			1
VFG033240(gb|WP_000457578) (fimI) Fimbrin-like protein fimI precursor [Type 1 fimbriae (VF0221) - Adherence (VFC0001)] [Escherichia coli NA114]											1										1.05422					1
VFG033242 (fimI) Fimbrin-like protein fimI precursor [Type 1 fimbriae (VF0221) - Adherence (VFC0001)] [Escherichia coli O78:H11:K80 str. H10407]																						1.00186	1.00186
VFG033243(gb|WP_000824114) (fimI) Fimbrin-like protein fimI precursor [Type 1 fimbriae (VF0221) - Adherence (VFC0001)] [Escherichia coli O45:K1:H7 str. S88]			1				1					1
VFG033245(gb|WP_000824114) (fimI) Fimbrin-like protein fimI precursor [Type 1 fimbriae (VF0221) - Adherence (VFC0001)] [Escherichia coli O7:K1 str. CE10]																			1
VFG033257(gb|WP_000066557) (fimC) Chaperone protein fimC precursor [Type 1 fimbriae (VF0221) - Adherence (VFC0001)] [Escherichia coli O111:H- str. 11128]	1							1	1
VFG033258(gb|WP_000066560) (fimC) Chaperone protein fimC precursor [Type 1 fimbriae (VF0221) - Adherence (VFC0001)] [Escherichia coli O26:H11 str. 11368]																1	1				1	1	1	1
VFG033261(gb|WP_000066560) (fimC) Chaperone protein fimC precursor [Type 1 fimbriae (VF0221) - Adherence (VFC0001)] [Escherichia coli NA114]		1	1							1					1			1	1
VFG033262(gb|WP_000066560) (fimC) Chaperone protein fimC precursor [Type 1 fimbriae (VF0221) - Adherence (VFC0001)] [Escherichia coli O17:K52:H18 str. UMN026]											1															1
VFG033264(gb|WP_000066568) (fimC) Chaperone protein fimC precursor [Type 1 fimbriae (VF0221) - Adherence (VFC0001)] [Escherichia coli O45:K1:H7 str. S88]				1			0.986226					0.986226	1	1
VFG033277(gb|WP_000120957) (fimD) Outer membrane usher protein fimD precursor [Type 1 fimbriae (VF0221) - Adherence (VFC0001)] [Escherichia coli O103:H2 str. 12009]														0.999621			1
VFG033278 (fimD) Outer membrane usher protein fimD precursor [Type 1 fimbriae (VF0221) - Adherence (VFC0001)] [Escherichia coli O111:H- str. 11128]	1	1.01112						1					0.999603		1							1	1			1
VFG033279(gb|WP_000120930) (fimD) Outer membrane usher protein fimD precursor [Type 1 fimbriae (VF0221) - Adherence (VFC0001)] [Escherichia coli O26:H11 str. 11368]																1		1	1		1			1
VFG033280(gb|WP_000125356) (fimD) Outer membrane usher protein fimD precursor [Type 1 fimbriae (VF0221) - Adherence (VFC0001)] [Escherichia coli O104:H4 str. 2009EL-2050]		1.02262	1	0.905354			0.919306	1	1	1.01659		0.914404		0.934389		0.909125	0.901584	1		1	0.941554		1	0.908748
VFG033284(gb|WP_000123650) (fimD) Outer membrane usher protein fimD precursor [Type 1 fimbriae (VF0221) - Adherence (VFC0001)] [Escherichia coli O44:H18 042]											1
VFG033285(gb|WP_000120940) (fimD) Outer membrane usher protein fimD precursor [Type 1 fimbriae (VF0221) - Adherence (VFC0001)] [Escherichia coli O7:K1 str. IAI39]			1
VFG033286 (fimD) Outer membrane usher protein fimD precursor [Type 1 fimbriae (VF0221) - Adherence (VFC0001)] [Escherichia coli ABU 83972]	0.930197		0.931209				0.921093	1	0.997471	1.00152	0.92868	0.996965		0.904401	1	0.994436	1.00152	0.998483	0.982296		0.916034		1.00607	1.00101		1.01163
VFG033291(gb|WP_000120948) (fimD) Outer membrane usher protein fimD precursor [Type 1 fimbriae (VF0221) - Adherence (VFC0001)] [Escherichia coli O45:K1:H7 str. S88]							1				1	1
VFG033294(gb|WP_000120942) (fimD) Outer membrane usher protein fimD precursor [Type 1 fimbriae (VF0221) - Adherence (VFC0001)] [Escherichia coli O78:H18 str. WS3294A]				0.999621					1	1
VFG033304(gb|WP_001244826) (fimF) FimF protein precursor [Type 1 fimbriae (VF0221) - Adherence (VFC0001)] [Escherichia coli O103:H2 str. 12009]																1	1	1			1			1
VFG033305(gb|WP_001244827) (fimF) FimF protein precursor [Type 1 fimbriae (VF0221) - Adherence (VFC0001)] [Escherichia coli O111:H- str. 11128]																							1		1
VFG033307(gb|WP_000876776) (fimF) FimF protein precursor [Type 1 fimbriae (VF0221) - Adherence (VFC0001)] [Escherichia coli O104:H4 str. 2009EL-2050]				1	1	1	1.03202					1.03202	1	1				1		1					1
VFG033311(gb|WP_000876770) (fimF) FimF protein precursor [Type 1 fimbriae (VF0221) - Adherence (VFC0001)] [Escherichia coli O44:H18 042]											1								1							1
VFG033315(gb|WP_001244835) (fimF) FimF protein precursor [Type 1 fimbriae (VF0221) - Adherence (VFC0001)] [Escherichia coli NA114]	1
VFG033317(gb|WP_001244822) (fimF) FimF protein precursor [Type 1 fimbriae (VF0221) - Adherence (VFC0001)] [Escherichia coli E24377A]							1					1
VFG033319(gb|WP_001244823) (fimF) FimF protein precursor [Type 1 fimbriae (VF0221) - Adherence (VFC0001)] [Escherichia coli O45:K1:H7 str. S88]			1
VFG033322(gb|WP_001244838) (fimF) FimF protein precursor [Type 1 fimbriae (VF0221) - Adherence (VFC0001)] [Escherichia coli O78:H18 str. WS3294A]		1								1					1
VFG033332(gb|WP_000872005) (fimG) FimG protein precursor [Type 1 fimbriae (VF0221) - Adherence (VFC0001)] [Escherichia coli O103:H2 str. 12009]																1	1	1			1			1
VFG033333(gb|WP_000870592) (fimG) FimG protein precursor [Type 1 fimbriae (VF0221) - Adherence (VFC0001)] [Escherichia coli O111:H- str. 11128]		1		1						1			1	1	1								1		1
VFG033335(gb|WP_000825461) (fimG) FimG protein precursor [Type 1 fimbriae (VF0221) - Adherence (VFC0001)] [Escherichia coli O104:H4 str. 2009EL-2050]	1	0.998016	1	1	1	1	1	1	1	0.998016	1	1	1	1	1	1	0.992063	1	1	1	0.986111		1	1	1	1
VFG033345(gb|WP_000870589) (fimG) FimG protein precursor [Type 1 fimbriae (VF0221) - Adherence (VFC0001)] [Escherichia coli E24377A]			1				1		0.980159			1
VFG033355(gb|WP_000832227) (fimH) FimH protein precursor [Type 1 fimbriae (VF0221) - Adherence (VFC0001)] [Escherichia coli O55:H7 str. CB9615]	1	1		1						1			1	1	1
VFG033360(gb|WP_000832227) (fimH) FimH protein precursor [Type 1 fimbriae (VF0221) - Adherence (VFC0001)] [Escherichia coli O103:H2 str. 12009]																		1
VFG033361(gb|WP_000832227) (fimH) FimH protein precursor [Type 1 fimbriae (VF0221) - Adherence (VFC0001)] [Escherichia coli O111:H- str. 11128]																							1
VFG033362(gb|WP_000832239) (fimH) FimH protein precursor [Type 1 fimbriae (VF0221) - Adherence (VFC0001)] [Escherichia coli O26:H11 str. 11368]																1	1				1			1
VFG033366(gb|WP_000832222) (fimH) FimH protein precursor [Type 1 fimbriae (VF0221) - Adherence (VFC0001)] [Escherichia coli NA114]																						1
VFG033368(gb|WP_001297233) (fimH) FimH protein precursor [Type 1 fimbriae (VF0221) - Adherence (VFC0001)] [Escherichia coli E24377A]							1					1
VFG033369(gb|WP_000832226) (fimH) FimH protein precursor [Type 1 fimbriae (VF0221) - Adherence (VFC0001)] [Escherichia coli O78:H11:K80 str. H10407]								1	1
VFG033370(gb|WP_001338195) (fimH) FimH protein precursor [Type 1 fimbriae (VF0221) - Adherence (VFC0001)] [Escherichia coli O45:K1:H7 str. S88]			1
VFG033373(gb|WP_000832227) (fimH) FimH protein precursor [Type 1 fimbriae (VF0221) - Adherence (VFC0001)] [Escherichia coli O78:H18 str. WS3294A]											1								1
VFG033376(gb|WP_000832236) (fimH) FimH protein precursor [Type 1 fimbriae (VF0221) - Adherence (VFC0001)] [Escherichia coli O83:H1 str. NRG 857C]																										1
VFG033401 (focD) F1C fimbrial usher [F1C fimbriae (VF0224) - Adherence (VFC0001)] [Escherichia coli ABU 83972]																										1
VFG034380(gb|WP_001381763) (ykgK/ecpR) regulator protein EcpR [ECP (VF0404) - Adherence (VFC0001)] [Escherichia coli O103:H2 str. 12009]																				1
VFG034382(gb|WP_001296902) (ykgK/ecpR) regulator protein EcpR [ECP (VF0404) - Adherence (VFC0001)] [Escherichia coli O104:H4 str. 2009EL-2050]		1								1													1
VFG034391(gb|WP_001305433) (ykgK/ecpR) regulator protein EcpR [ECP (VF0404) - Adherence (VFC0001)] [Escherichia coli O17:K52:H18 str. UMN026]											1
VFG034392(gb|WP_001323479) (ykgK/ecpR) regulator protein EcpR [ECP (VF0404) - Adherence (VFC0001)] [Escherichia coli E24377A]			1					1	1									1
VFG034393(gb|WP_001301257) (ykgK/ecpR) regulator protein EcpR [ECP (VF0404) - Adherence (VFC0001)] [Escherichia coli O78:H11:K80 str. H10407]				1									1	1			1				1			1
VFG034394(gb|WP_015675133) (ykgK/ecpR) regulator protein EcpR [ECP (VF0404) - Adherence (VFC0001)] [Escherichia coli UMNK88]					1	1
VFG034402(gb|WP_000730982) (yagZ/ecpA) E. coli common pilus structural subunit EcpA [ECP (VF0404) - Adherence (VFC0001)] [Escherichia coli O127:H6 str. E2348/69]																										1
VFG034408(gb|WP_000730972) (yagZ/ecpA) E. coli common pilus structural subunit EcpA [ECP (VF0404) - Adherence (VFC0001)] [Escherichia coli O103:H2 str. 12009]																				1
VFG034409(gb|WP_000730968) (yagZ/ecpA) E. coli common pilus structural subunit EcpA [ECP (VF0404) - Adherence (VFC0001)] [Escherichia coli O26:H11 str. 11368]	1																					1
VFG034419(gb|WP_000730974) (yagZ/ecpA) E. coli common pilus structural subunit EcpA [ECP (VF0404) - Adherence (VFC0001)] [Escherichia coli E24377A]			1				0.982993	1	1		1	0.982993						1
VFG034435(gb|WP_000716383) (yagY/ecpB) E. coli common pilus chaperone EcpB [ECP (VF0404) - Adherence (VFC0001)] [Escherichia coli O103:H2 str. 12009]	1																		1	1		1
VFG034436(gb|WP_000716398) (yagY/ecpB) E. coli common pilus chaperone EcpB [ECP (VF0404) - Adherence (VFC0001)] [Escherichia coli O26:H11 str. 11368]		1								1
VFG034446(gb|WP_000716404) (yagY/ecpB) E. coli common pilus chaperone EcpB [ECP (VF0404) - Adherence (VFC0001)] [Escherichia coli O17:K52:H18 str. UMN026]											1
VFG034449(gb|WP_000716383) (yagY/ecpB) E. coli common pilus chaperone EcpB [ECP (VF0404) - Adherence (VFC0001)] [Escherichia coli UMNK88]					1	1
VFG034453(gb|WP_000716398) (yagY/ecpB) E. coli common pilus chaperone EcpB [ECP (VF0404) - Adherence (VFC0001)] [Escherichia coli O78:H18 str. WS3294A]			1															1
VFG034463(gb|WP_001131123) (yagX/ecpC) E. coli common pilus usher EcpC [ECP (VF0404) - Adherence (VFC0001)] [Escherichia coli O103:H2 str. 12009]																				1
VFG034464(gb|WP_001131081) (yagX/ecpC) E. coli common pilus usher EcpC [ECP (VF0404) - Adherence (VFC0001)] [Escherichia coli O26:H11 str. 11368]		1						1	1	1													1
VFG034474(gb|WP_001131069) (yagX/ecpC) E. coli common pilus usher EcpC [ECP (VF0404) - Adherence (VFC0001)] [Escherichia coli O17:K52:H18 str. UMN026]											1
VFG034481(gb|WP_001131091) (yagX/ecpC) E. coli common pilus usher EcpC [ECP (VF0404) - Adherence (VFC0001)] [Escherichia coli O78:H18 str. WS3294A]			1
VFG034491(gb|WP_001265646) (yagW/ecpD) polymerized tip adhesin of ECP fibers [ECP (VF0404) - Adherence (VFC0001)] [Escherichia coli O103:H2 str. 12009]																				1
VFG034492(gb|WP_001323478) (yagW/ecpD) polymerized tip adhesin of ECP fibers [ECP (VF0404) - Adherence (VFC0001)] [Escherichia coli O26:H11 str. 11368]		1	1					1	1	1													1
VFG034503(gb|WP_001265663) (yagW/ecpD) polymerized tip adhesin of ECP fibers [ECP (VF0404) - Adherence (VFC0001)] [Escherichia coli E24377A]	1										1
VFG034505(gb|WP_001301239) (yagW/ecpD) polymerized tip adhesin of ECP fibers [ECP (VF0404) - Adherence (VFC0001)] [Escherichia coli UMNK88]					1	1
VFG034511(gb|WP_001265646) (yagW/ecpD) polymerized tip adhesin of ECP fibers [ECP (VF0404) - Adherence (VFC0001)] [Escherichia coli O83:H1 str. LF82]																			1							1
VFG034514(gb|WP_001359370) (yagV/ecpE) E. coli common pilus chaperone EcpE [ECP (VF0404) - Adherence (VFC0001)] [Escherichia coli O55:H7 str. CB9615]																			1
VFG034519(gb|WP_001299009) (yagV/ecpE) E. coli common pilus chaperone EcpE [ECP (VF0404) - Adherence (VFC0001)] [Escherichia coli O103:H2 str. 12009]											1							1		1
VFG034521(gb|WP_001305432) (yagV/ecpE) E. coli common pilus chaperone EcpE [ECP (VF0404) - Adherence (VFC0001)] [Escherichia coli O104:H4 str. 2009EL-2050]		1	1					1	1	1													1
VFG034533(gb|WP_001301243) (yagV/ecpE) E. coli common pilus chaperone EcpE [ECP (VF0404) - Adherence (VFC0001)] [Escherichia coli UMNK88]					1	1																1
VFG034547(gb|WP_000092542) (eaeH) intimin-like adhesin FdeC [EaeH (VF1119) - Adherence (VFC0001)] [Escherichia coli UTI89]																										1
VFG034551(gb|WP_000092592) (eaeH) intimin-like adhesin FdeC [EaeH (VF1119) - Adherence (VFC0001)] [Escherichia coli O157:H7 str. EC4115]	1																		1			1
VFG034554(gb|WP_000092559) (eaeH) intimin-like adhesin FdeC [EaeH (VF1119) - Adherence (VFC0001)] [Escherichia coli O103:H2 str. 12009]																				1
VFG034556(gb|WP_000092564) (eaeH) intimin-like adhesin FdeC [EaeH (VF1119) - Adherence (VFC0001)] [Escherichia coli O104:H4 str. 2009EL-2050]																		1					1
VFG034564(gb|WP_000092574) (eaeH) intimin-like adhesin FdeC [EaeH (VF1119) - Adherence (VFC0001)] [Escherichia coli O17:K52:H18 str. UMN026]											1
VFG034565(gb|WP_000020232) (eaeH) intimin-like adhesin FdeC [EaeH (VF1119) - Adherence (VFC0001)] [Escherichia coli E24377A]		1								1
VFG034566(gb|WP_000020216) (eaeH) intimin-like adhesin FdeC [EaeH (VF1119) - Adherence (VFC0001)] [Escherichia coli O78:H11:K80 str. H10407]				1			1					1	1	1		1	1				1			1	0.993188
VFG034567(gb|WP_000020231) (eaeH) intimin-like adhesin FdeC [EaeH (VF1119) - Adherence (VFC0001)] [Escherichia coli UMNK88]					1	1
VFG034570(gb|WP_000020228) (eaeH) intimin-like adhesin FdeC [EaeH (VF1119) - Adherence (VFC0001)] [Escherichia coli O78:H18 str. WS3294A]			1.00118					1.00141	1.00141
VFG034595(gb|WP_000708866) (faeC) FaeC [Adhesive fimbriae (VF0213) - Adherence (VFC0001)] [Escherichia coli UMNK88]					1	1
VFG034596(gb|WP_000761063) (faeD) fimbrial usher protein FaeD [Adhesive fimbriae (VF0213) - Adherence (VFC0001)] [Escherichia coli UMNK88]				1.00821	1.00041	1	1.00821				1.00821	1.00821	1.00821	1.00821
VFG034597(gb|WP_000044493) (faeE) fimbrial chaperone FaeE [Adhesive fimbriae (VF0213) - Adherence (VFC0001)] [Escherichia coli UMNK88]				1.01287	1	1	1.01416				1.01673	1.01673	1.01287	1.01931
VFG034598(gb|WP_000753462) (faeF) fimbrial protein FaeF [Adhesive fimbriae (VF0213) - Adherence (VFC0001)] [Escherichia coli UMNK88]				1	1	1	1				1	1	1	1
VFG034599(gb|WP_000751752) (faeG) fimbrial protein FaeG [Adhesive fimbriae (VF0213) - Adherence (VFC0001)] [Escherichia coli UMNK88]					1.00353	1.00353
VFG034600(gb|WP_000704731) (faeH) fimbrial protein FaeH [Adhesive fimbriae (VF0213) - Adherence (VFC0001)] [Escherichia coli UMNK88]				0.996241	1	1	1.00376				1.03008	0.987469	0.974937	1.00251
VFG034601(gb|WP_000758129) (faeI) fimbrial protein FaeI [Adhesive fimbriae (VF0213) - Adherence (VFC0001)] [Escherichia coli UMNK88]					1	1
VFG034602(gb|WP_000932014) (faeJ) fimbrial protein FaeJ [Adhesive fimbriae (VF0213) - Adherence (VFC0001)] [Escherichia coli UMNK88]					1	1
VFG034604(gb|WP_000225860) (cfaA) colonisation factor antigen a, chaperone [Adhesive fimbriae (VF0213) - Adherence (VFC0001)] [Escherichia coli O103:H2 str. 12009]																				1
VFG034605(gb|WP_000225866) (cfaA) colonisation factor antigen a, chaperone [Adhesive fimbriae (VF0213) - Adherence (VFC0001)] [Escherichia coli O111:H- str. 11128]			1					1	1														1
VFG034611(gb|WP_000225857) (cfaA) colonisation factor antigen a, chaperone [Adhesive fimbriae (VF0213) - Adherence (VFC0001)] [Escherichia coli O7:K1 str. IAI39]																		0.970711
VFG034612(gb|WP_000225871) (cfaA) colonisation factor antigen a, chaperone [Adhesive fimbriae (VF0213) - Adherence (VFC0001)] [Escherichia coli E24377A]		1								1					1	0.998605
VFG034623(gb|WP_000755097) (cfaB) colonization factor antigen 1 [Adhesive fimbriae (VF0213) - Adherence (VFC0001)] [Escherichia coli O7:K1 str. IAI39]																		1
VFG034624(gb|WP_000755097) (cfaB) colonization factor antigen 1 [Adhesive fimbriae (VF0213) - Adherence (VFC0001)] [Escherichia coli E24377A]		1						1	1	1					1	0.998004				1			1
VFG034626(gb|WP_000755097) (cfaB) colonization factor antigen 1 [Adhesive fimbriae (VF0213) - Adherence (VFC0001)] [Escherichia coli O78:H18 str. WS3294A]			1
VFG034631(gb|WP_000358674) (cfaC) colonisation factor antigen c, usher [Adhesive fimbriae (VF0213) - Adherence (VFC0001)] [Escherichia coli O104:H4 str. 2009EL-2050]								1	1											1
VFG034635(gb|WP_000358645) (cfaC) colonisation factor antigen c, usher [Adhesive fimbriae (VF0213) - Adherence (VFC0001)] [Escherichia coli O7:K1 str. IAI39]																		1
VFG034636(gb|WP_000358674) (cfaC) colonisation factor antigen c, usher [Adhesive fimbriae (VF0213) - Adherence (VFC0001)] [Escherichia coli E24377A]		1	1							1					1								1
VFG034638 (cfaC) colonisation factor antigen c, usher [Adhesive fimbriae (VF0213) - Adherence (VFC0001)] [Escherichia coli O78:H18 str. WS3294A]		1						1	0.992222	1					1			1		1			1
VFG034640(gb|WP_001245988) (cfaD/cfaE) minor pilin and initiator [Adhesive fimbriae (VF0213) - Adherence (VFC0001)] [Escherichia coli O103:H2 str. 12009]																				1
VFG034647(gb|WP_001245981) (cfaD/cfaE) minor pilin and initiator [Adhesive fimbriae (VF0213) - Adherence (VFC0001)] [Escherichia coli O7:K1 str. IAI39]																		1
VFG034648(gb|WP_001245988) (cfaD/cfaE) minor pilin and initiator [Adhesive fimbriae (VF0213) - Adherence (VFC0001)] [Escherichia coli E24377A]		1	1					1	1	1					1								1
VFG035937(gb|WP_000907437) (air/eaeX) inverse autotransporter adhesin EaeX/Air [Enteroaggregative immunoglobulin repeat protein (VF1124) - Adherence (VFC0001)] [Escherichia coli O44:H18 042]	0.910078																					1.00009
VFG035938(gb|WP_000907441) (air/eaeX) inverse autotransporter adhesin EaeX/Air [Enteroaggregative immunoglobulin repeat protein (VF1124) - Adherence (VFC0001)] [Escherichia coli O17:K52:H18 str. UMN026]	1.00029										0.999415
VFG035939 (air/eaeX) Ig-like domain-containing protein [Enteroaggregative immunoglobulin repeat protein (VF1124) - Adherence (VFC0001)] [Escherichia coli O7:K1 str. CE10]	1.00926																		1.02001			1.0132
VFG035940(gb|WP_001033292) (upaG/ehaG) trimeric autotransporter adhesin UpaG [UpaG adhesin, trimeric AT (VF1125) - Adherence (VFC0001)] [Escherichia coli CFT073]																										0.969646
VFG035946(gb|WP_001033190) (upaG/ehaG) trimeric autotransporter adhesin EhaG [UpaG adhesin, trimeric AT (VF1125) - Adherence (VFC0001)] [Escherichia coli O55:H7 str. CB9615]																		1.05412
VFG035950(gb|WP_001033224) (upaG/ehaG) trimeric autotransporter adhesin EhaG [UpaG adhesin, trimeric AT (VF1125) - Adherence (VFC0001)] [Escherichia coli O103:H2 str. 12009]		1								1					1					1			1
VFG035951(gb|WP_001033229) (upaG/ehaG) trimeric autotransporter adhesin EhaG [UpaG adhesin, trimeric AT (VF1125) - Adherence (VFC0001)] [Escherichia coli O111:H- str. 11128]																		0.958359
VFG035952(gb|WP_001033225) (upaG/ehaG) trimeric autotransporter adhesin EhaG [UpaG adhesin, trimeric AT (VF1125) - Adherence (VFC0001)] [Escherichia coli O26:H11 str. 11368]								1	1							0.960214	0.962688		0.998145		0.960833			0.964543
VFG035957(gb|WP_001033306) (upaG/ehaG) YadA-like family protein [UpaG adhesin, trimeric AT (VF1125) - Adherence (VFC0001)] [Escherichia coli O44:H18 042]											0.987385
VFG035981(gb|WP_001443549) (ehaA) autotransporter adhesin EhaA [EhaA, AIDA-I type (VF1127) - Adherence (VFC0001)] [Escherichia coli O103:H2 str. 12009]																				1
VFG035983(gb|WP_001341217) (ehaA) autotransporter adhesin EhaA [EhaA, AIDA-I type (VF1127) - Adherence (VFC0001)] [Escherichia coli O26:H11 str. 11368]																						0.998996
VFG035989(gb|WP_012000928) (ehaA) autotransporter adhesin EhaA [EhaA, AIDA-I type (VF1127) - Adherence (VFC0001)] [Escherichia coli E24377A]	1	1								1													1
VFG035992(gb|WP_000556414) (ehaB) autotransporter outer membrane beta-barrel domain-containing protein [EhaB, AIDA-I type (VF1128) - Adherence (VFC0001)] [Escherichia coli UTI89]																										1
VFG035993(gb|WP_000556455) (ehaB) autotransporter adhesin EhaB [EhaB, AIDA-I type (VF1128) - Adherence (VFC0001)] [Escherichia coli O55:H7 str. CB9615]																						1.02548
VFG035996(gb|WP_000556528) (ehaB) autotransporter outer membrane beta-barrel domain-containing protein [EhaB, AIDA-I type (VF1128) - Adherence (VFC0001)] [Escherichia coli O103:H2 str. 12009]				0.988922			0.994965					0.994965	0.990601	0.98758		0.988251	0.988251			0.980195	0.988251			0.988251
VFG036003 (ehaB) autotransporter outer membrane beta-barrel domain-containing protein [EhaB, AIDA-I type (VF1128) - Adherence (VFC0001)] [Escherichia coli E24377A]																		1							1.28587
VFG036004(gb|WP_000556481) (ehaB) autotransporter adhesin EhaB [EhaB, AIDA-I type (VF1128) - Adherence (VFC0001)] [Escherichia coli UMNK88]					1	1
VFG036008 (ehaB) autotransporter outer membrane beta-barrel domain-containing protein [EhaB, AIDA-I type (VF1128) - Adherence (VFC0001)] [Escherichia coli O78:H18 str. WS3294A]			1				1.00559	1	1					1.03617					1.01342
VFG036009(gb|WP_000556469) (ehaB) autotransporter adhesin EhaB [EhaB, AIDA-I type (VF1128) - Adherence (VFC0001)] [Escherichia coli O83:H1 str. LF82]	1.01831	1.01017								1.01017	1				1.01153								1.01831
VFG036043(gb|WP_001038844) (aatA) autotransporter outer membrane beta-barrel domain-containing protein [AatA, AIDA-I type (VF1133) - Adherence (VFC0001)] [Escherichia coli APEC O1]																1	1				1			0.999714
VFG042387(gb|CAA46156) (CAA46156) AIDA-I [AIDA-I (VF1113) - Adherence (VFC0001)] [Escherichia coli O126:H27:K12 2787]															1.00958	0.992489	1.00311	1.00078	1.00078	1.00078	1.00207			0.992489	0.992489
VFG042398(gb|WP_000750295) (elfA) fimbrial protein [E.coli laminin-binding fimbriae (ELF) (VF1140) - Adherence (VFC0001)] [Escherichia coli O157:H7 str. EDL933]	1																					1
VFG042402(gb|WP_077626202) (ycbU) fimbrial protein [E.coli laminin-binding fimbriae (ELF) (VF1140) - Adherence (VFC0001)] [Escherichia coli O157:H7 str. EDL933]	1	1	1	1	1	1	1	1	1	1	1	1	1	1	1	1	1	1	1	1	1	1	1	1	1
VFG042403(gb|WP_000919494) (ycbV) type 1 fimbrial protein [E.coli laminin-binding fimbriae (ELF) (VF1140) - Adherence (VFC0001)] [Escherichia coli O157:H7 str. EDL933]	1	1	1	1	1	1	1	1	1	1	1	1	1	1	1	1	1	1	1	1	1	1	1	1	1
VFG042404 (ycbF) fimbrial chaperone [E.coli laminin-binding fimbriae (ELF) (VF1140) - Adherence (VFC0001)] [Escherichia coli O157:H7 str. EDL933]	1.00136	1.00136	1.00136	1.00136	1.00136	1.00136	1.00136	1.00136	1.00136	1.00136	1.00136	1.00136	1.00136	1.00136	1.00136	1.00136	1.00136	1.00136	1.00136	1.00136	1.00136	1.00136	1.00136	1.00136	1.00136
VFG042459(gb|AAC41418) (cfaD') colonisation factor antigen d' [Adhesive fimbriae (VF0213) - Adherence (VFC0001)] [Escherichia coli str. E7473]				1.0069							1
VFG042495(gb|CAA50787) (cshC) cshC chaperone [Adhesive fimbriae (VF0213) - Adherence (VFC0001)] [Escherichia coli str. PE]											0.985843			1.00772
VFG042525(gb|AAC28313) (afrS) transcriptional activator precursor AfrS [Adhesive factor/rabbit 1 (AF/R1) pili (VF1146) - Adherence (VFC0001)] [Escherichia coli str. RDEC-1]																						0.994845
VFG042529(gb|AAC28317) (afrC) chaperonin precursor [Adhesive factor/rabbit 1 (AF/R1) pili (VF1146) - Adherence (VFC0001)] [Escherichia coli str. RDEC-1]																1	1				1			1	1
VFG042533(gb|AAB39316) (clpC) ClpC [CS31A capsule-like antigen (VF1147) - Adherence (VFC0001)] [Escherichia coli]				1			1				1	1	1	1
VFG042534(gb|AAB39317) (clpD) structure protein [CS31A capsule-like antigen (VF1147) - Adherence (VFC0001)] [Escherichia coli]				0.9869			0.9869				0.9869	0.9869	0.9869	0.9869
VFG042554(gb|WP_000753462) (faeF) F4 (K88) fimbria minor subunit FaeF [Adhesive fimbriae (VF0213) - Adherence (VFC0001)] [Escherichia coli SE11]				1			1				1	1	1	1
VFG042561(gb|CAA81287) (fedE) FedE [Adhesive fimbriae (VF0213) - Adherence (VFC0001)] [Escherichia coli str. 107/86]	1	1.00581	1					1	1	1.00581					1.00581		1				0.926357	1	1	0.996124
VFG042562(gb|CAA81288) (fedF) FedF [Adhesive fimbriae (VF0213) - Adherence (VFC0001)] [Escherichia coli str. 107/86]	1	1	1					1	1	1					1	0.990033	1.00111				0.997785	1	0.981174
VFG042563(gb|CAC69395) (fedC) FedC protein [Adhesive fimbriae (VF0213) - Adherence (VFC0001)] [Escherichia coli]	1	1	1					1	1	1					1	1	1				1	1	0.998344	1	1.00083
VFG042564(gb|CAC69396) (fedD) FedD protein [Adhesive fimbriae (VF0213) - Adherence (VFC0001)] [Escherichia coli]	1	1	1					1	1	1					1		1.00722				1	1	0.994228		0.997114
VFG042565(gb|CAL25325) (fedA) fimbrial protein F107 subunit A precursor [Adhesive fimbriae (VF0213) - Adherence (VFC0001)] [Escherichia coli O9 str. MP9716]	1	1	1					1	1	1					1							1
VFG042567(gb|WP_000046975) (C_RS05810) S/F1C fimbrial major subunit operon transcriptional regulator [F1C fimbriae (VF0224) - Adherence (VFC0001)] [Escherichia coli CFT073]																										1
VFG042568(gb|WP_000012016) (sfaY) transcriptional regulator SfaY [F1C fimbriae (VF0224) - Adherence (VFC0001)] [Escherichia coli CFT073]																										1
VFG042590(gb|AAS99229) (stgA) StgA [Stg fimbriae (VF1150) - Adherence (VFC0001)] [Escherichia coli O78:K80:H9 chi7122]			1					1	1						0.99651								1
VFG042591(gb|AAS99230) (stgB) StgB [Stg fimbriae (VF1150) - Adherence (VFC0001)] [Escherichia coli O78:K80:H9 chi7122]			1					1	1	0.943989					1								1
VFG042592(gb|AAS99231) (stgC) StgC [Stg fimbriae (VF1150) - Adherence (VFC0001)] [Escherichia coli O78:K80:H9 chi7122]		1	1					1	1	1					1								1
VFG042593(gb|AAS99232) (stgD) StgD [Stg fimbriae (VF1150) - Adherence (VFC0001)] [Escherichia coli O78:K80:H9 chi7122]		1	1					1	1	1					1								1
VFG042616(gb|WP_012367648) (PMI_RS02635) type 1 fimbrial protein [Uroepithelial cell adhesin (UCA) (VF1235) - Adherence (VFC0001)] [Proteus mirabilis HI4320]																							0.99723			0.99723
VFG042617(gb|WP_012367649) (PMI_RS02640) fimbrial biogenesis outer membrane usher protein [Uroepithelial cell adhesin (UCA) (VF1235) - Adherence (VFC0001)] [Proteus mirabilis HI4320]																							0.995266			0.995266
VFG042618(gb|WP_012367650) (PMI_RS02645) fimbria/pilus periplasmic chaperone [Uroepithelial cell adhesin (UCA) (VF1235) - Adherence (VFC0001)] [Proteus mirabilis HI4320]																							1			1
VFG042713(gb|WP_001296758) (fimA) type 1 fimbrial major subunit FimA [F9 fimbriae (VF1153) - Adherence (VFC0001)] [Escherichia coli O157:H7 str. EDL933]	1	1	1					1	1	1	1				1			1	1	1		1	1			1
VFG042714(gb|WP_001195169) (Z_RS10335) fimbria/pilus periplasmic chaperone [F9 fimbriae (VF1153) - Adherence (VFC0001)] [Escherichia coli O157:H7 str. EDL933]	1	1	1					1	1	1	1				1			1		1		1	1			1
VFG042715(gb|WP_000123651) (Z_RS10340) fimbrial biogenesis outer membrane usher protein [F9 fimbriae (VF1153) - Adherence (VFC0001)] [Escherichia coli O157:H7 str. EDL933]	1														1				0.991327			1				1
VFG042716(gb|WP_000876770) (ydeS) type 1 fimbrial protein [F9 fimbriae (VF1153) - Adherence (VFC0001)] [Escherichia coli O157:H7 str. EDL933]	1	1	1					1	1	1					1		1.0113					1	1
VFG042717(gb|WP_000825463) (ydeR) type 1 fimbrial protein [F9 fimbriae (VF1153) - Adherence (VFC0001)] [Escherichia coli O157:H7 str. EDL933]																						1
VFG042718(gb|WP_000520684) (ydeQ) fimbrial protein [F9 fimbriae (VF1153) - Adherence (VFC0001)] [Escherichia coli O157:H7 str. EDL933]	1	1	1	1	1	1	1	1	1	1	1	1	1	1	1	1	1	1	1	1	1	1	1	1	1	1
VFG042725(gb|WP_001189321) (csgG) curli production assembly/transport protein CsgG [Curli fibers (VF1138) - Adherence (VFC0001)] [Escherichia coli O157:H7 str. EDL933]	1	1	1					1	1	1	1				0.98801				1	1		1	1			1
VFG042726(gb|WP_001267015) (csgF) curli production assembly/transport protein CsgF [Curli fibers (VF1138) - Adherence (VFC0001)] [Escherichia coli O157:H7 str. EDL933]	1	1	1					1	1	1	1								1	1		1	1
VFG042727(gb|WP_000833288) (csgE) curli production assembly/transport protein CsgE [Curli fibers (VF1138) - Adherence (VFC0001)] [Escherichia coli O157:H7 str. EDL933]	1										1											1				0.953846
VFG042728(gb|WP_000481500) (csgD) transcriptional regulator CsgD [Curli fibers (VF1138) - Adherence (VFC0001)] [Escherichia coli O157:H7 str. EDL933]	1																					1
VFG042729(gb|WP_000791650) (csgB) curlin minor subunit CsgB [Curli fibers (VF1138) - Adherence (VFC0001)] [Escherichia coli O157:H7 str. EDL933]		1									1							0.995614							1
VFG042730(gb|WP_000771428) (csgA) curlin major subunit CsgA [Curli fibers (VF1138) - Adherence (VFC0001)] [Escherichia coli O157:H7 str. EDL933]	1.00654																		1			1
VFG042731(gb|WP_000992818) (csgC) curli assembly protein CsgC [Curli fibers (VF1138) - Adherence (VFC0001)] [Escherichia coli O157:H7 str. EDL933]																		1	1			1
VFG042798(gb|WP_000157271) (hcpC) protein transport protein HofC [Hemorrhagic E.coli pilus (HCP) (VF1141) - Adherence (VFC0001)] [Escherichia coli O157:H7 str. EDL933]	1																		1			1		0.998337
VFG042799(gb|WP_001025202) (hcpB) type II secretion system protein GspE [Hemorrhagic E.coli pilus (HCP) (VF1141) - Adherence (VFC0001)] [Escherichia coli O157:H7 str. EDL933]	1																1	1	1			1
VFG042800(gb|WP_000360900) (hcpA) prepilin peptidase-dependent pilin [Hemorrhagic E.coli pilus (HCP) (VF1141) - Adherence (VFC0001)] [Escherichia coli O157:H7 str. EDL933]				1									1	1
VFG043544(gb|WP_000750416) (ompA) porin OmpA [Z1307 (VF1158) - Adherence (VFC0001)] [Escherichia coli O157:H7 str. EDL933]	1.01153	1.01153	1.01153	1	1.01153	1.01153	1	1.01153	1.01153	1.01153	1.01153	1	1	1	1.01153	1	1	1.01153	1.01441	1	1	1.01441	1	1	1
VFG043568(gb|NP_460531) (nmpC) phosphoporin PhoE [OmpD (VF0969) - Adherence (VFC0001)] [Salmonella enterica subsp. enterica serovar Typhimurium str. LT2]							0.990817					0.99449			1.01102			1.00826		1.00826		1.00826	1.00826	1.0202		0.99449
VFG043643(gb|AAA23598) (clpE) unknown protein [CS31A capsule-like antigen (VF1147) - Adherence (VFC0001)] [Escherichia coli K-12 31A]				1			1				1	1		1
VFG043644(gb|AAA23586) (clpL) CS31A minor subunit [CS31A capsule-like antigen (VF1147) - Adherence (VFC0001)] [Escherichia coli K-12 31A]				1			1				1	1	1	1
VFG043645(gb|AAA23584) (clpF) unknown protein [CS31A capsule-like antigen (VF1147) - Adherence (VFC0001)] [Escherichia coli K-12 31A]				1.0061			1.00407				1.00203	1	1	1
VFG043647(gb|AAA23780) (clpH) fimbrial protein [CS31A capsule-like antigen (VF1147) - Adherence (VFC0001)] [Escherichia coli]				0.997503			0.997503				0.997503	0.997503	0.997503	0.997503
VFG045773 (fimB) Type 1 fimbriae Regulatory protein fimB [Type 1 fimbriae (VF0221) - Adherence (VFC0001)] [Escherichia coli O25b:H4-ST131]	0.970588	0.963235	1	0.985294			0.980392	1		1	0.995098	0.997549	0.916667	0.919118			0.953431	0.914216	1		0.97549	1	1	1		1.00245
VFG045776(gb|WP_000824114) (fimI) Fimbrin-like protein fimI precursor [Type 1 fimbriae (VF0221) - Adherence (VFC0001)] [Escherichia coli O25b:H4-ST131]																										0.97963
VFG045789(gb|WP_001264082) (cgsF) curli production assembly/transport protein CsgF [Curli fibers (VF1138) - Adherence (VFC0001)] [Escherichia coli O25b:H4-ST131]																										1
VFG045790(gb|WP_000833288) (cgsE) curli production assembly/transport protein CsgE [Curli fibers (VF1138) - Adherence (VFC0001)] [Escherichia coli O25b:H4-ST131]																			1							1
VFG045791(gb|WP_000481500) (cgsD) transcriptional regulator CsgD [Curli fibers (VF1138) - Adherence (VFC0001)] [Escherichia coli O25b:H4-ST131]		1	1					1	1	1	1									1			1			1
VFG045792(gb|WP_000791650) (csgB) curlin minor subunit CsgB [Curli fibers (VF1138) - Adherence (VFC0001)] [Escherichia coli O25b:H4-ST131]			1	1	1	1	0.991228		1	1		0.991228	1	1		1	1		1	1	1	1	1	1		1
VFG045793(gb|WP_000771429) (csgA) curlin major subunit CsgA [Curli fibers (VF1138) - Adherence (VFC0001)] [Escherichia coli O25b:H4-ST131]											1															0.993464
VFG045794(gb|WP_000992818) (csgC) curli assembly protein CsgC [Curli fibers (VF1138) - Adherence (VFC0001)] [Escherichia coli O25b:H4-ST131]		1						1	1	1	1				1					1			1			1
VFG045856(gb|WP_000750293) (elfA) fimbrial protein [E.coli laminin-binding fimbriae (ELF) (VF1140) - Adherence (VFC0001)] [Escherichia coli VR50]				1			1					1	1	1		1	1				1			1	0.97963
VFG045865(gb|WP_000750284) (elfA) fimbrial protein [E.coli laminin-binding fimbriae (ELF) (VF1140) - Adherence (VFC0001)] [Escherichia coli O103:H2 str. 12009]		1	1					1	1	1	1				1			1		1			1
VFG045875(gb|WP_000750304) (elfA) fimbrial protein [E.coli laminin-binding fimbriae (ELF) (VF1140) - Adherence (VFC0001)] [Escherichia coli UMNK88]					1	1													1
VFG045878(gb|WP_001295349) (elfD) molecular chaperone [E.coli laminin-binding fimbriae (ELF) (VF1140) - Adherence (VFC0001)] [Escherichia coli VR50]				1			1					1	1	1		1.00142	1				1			1	1
VFG045887(gb|WP_000845152) (elfD) molecular chaperone [E.coli laminin-binding fimbriae (ELF) (VF1140) - Adherence (VFC0001)] [Escherichia coli O103:H2 str. 12009]		1						1	1	1								1		1			1
VFG045894(gb|WP_001330060) (elfD) molecular chaperone [E.coli laminin-binding fimbriae (ELF) (VF1140) - Adherence (VFC0001)] [Escherichia coli O7:K1 str. IAI39]											1
VFG045897(gb|WP_074151099) (elfD) molecular chaperone [E.coli laminin-binding fimbriae (ELF) (VF1140) - Adherence (VFC0001)] [Escherichia coli UMNK88]					1	1													1
VFG045899(gb|WP_000845152) (elfD) molecular chaperone [E.coli laminin-binding fimbriae (ELF) (VF1140) - Adherence (VFC0001)] [Escherichia coli O78:H18 str. WS3294A]	1		1												1							1
VFG045900(gb|WP_000286312) (elfC) fimbrial biogenesis usher protein [E.coli laminin-binding fimbriae (ELF) (VF1140) - Adherence (VFC0001)] [Escherichia coli VR50]				1			1					1	1	1		1.00038	1.00038				1.00038			1.00038	1
VFG045902 (elfC) fimbrial biogenesis usher protein [E.coli laminin-binding fimbriae (ELF) (VF1140) - Adherence (VFC0001)] [Escherichia coli O55:H7 str. CB9615]	0.975385																		1
VFG045904(gb|WP_000286318) (elfC) fimbrial biogenesis usher protein [E.coli laminin-binding fimbriae (ELF) (VF1140) - Adherence (VFC0001)] [Escherichia coli O111:H- str. 11128]		1						1	1	1	1				1					1			1
VFG045913(gb|WP_000286336) (elfC) fimbrial biogenesis usher protein [E.coli laminin-binding fimbriae (ELF) (VF1140) - Adherence (VFC0001)] [Escherichia coli UMNK88]					1	1												1				1
VFG045915(gb|WP_000286313) (elfC) fimbrial biogenesis usher protein [E.coli laminin-binding fimbriae (ELF) (VF1140) - Adherence (VFC0001)] [Escherichia coli O78:H18 str. WS3294A]			1
VFG045916(gb|WP_001165668) (elfG) fimbrial protein [E.coli laminin-binding fimbriae (ELF) (VF1140) - Adherence (VFC0001)] [Escherichia coli VR50]	0.989729				1	1					1					1					1.00093			1	1
VFG045917(gb|NP_415461) (elfG) putative fimbrial-like adhesin protein [E.coli laminin-binding fimbriae (ELF) (VF1140) - Adherence (VFC0001)] [Escherichia coli str. K-12 substr. MG1655]																	1
VFG045918(gb|WP_001165678) (elfG) fimbrial protein [E.coli laminin-binding fimbriae (ELF) (VF1140) - Adherence (VFC0001)] [Escherichia coli O55:H7 str. CB9615]	1																		1
VFG045923(gb|WP_001165655) (elfG) fimbrial protein [E.coli laminin-binding fimbriae (ELF) (VF1140) - Adherence (VFC0001)] [Escherichia coli O103:H2 str. 12009]								1	1						1					1
VFG045926(gb|WP_001165657) (elfG) fimbrial protein [E.coli laminin-binding fimbriae (ELF) (VF1140) - Adherence (VFC0001)] [Escherichia coli O104:H4 str. 2009EL-2050]											1
VFG045931(gb|WP_001165658) (elfG) fimbrial protein [E.coli laminin-binding fimbriae (ELF) (VF1140) - Adherence (VFC0001)] [Escherichia coli E24377A]		1								1													1
VFG045932 (elfG) fimbrial protein [E.coli laminin-binding fimbriae (ELF) (VF1140) - Adherence (VFC0001)] [Escherichia coli O78:H11:K80 str. H10407]				0.975141			0.953672					0.953672	0.975141	0.975141				0.951412			1
VFG045933(gb|WP_001165671) (elfG) fimbrial protein [E.coli laminin-binding fimbriae (ELF) (VF1140) - Adherence (VFC0001)] [Escherichia coli UMNK88]																		1
VFG045935(gb|WP_001165655) (elfG) fimbrial protein [E.coli laminin-binding fimbriae (ELF) (VF1140) - Adherence (VFC0001)] [Escherichia coli O78:H18 str. WS3294A]			1																			1
VFG045936(gb|WP_000360904) (hcpA) prepilin peptidase-dependent pilin [Hemorrhagic E.coli pilus (HCP) (VF1141) - Adherence (VFC0001)] [Escherichia coli VR50]	1				1	1	1	1	1			1				1	1				1	1		1	1
VFG045947(gb|WP_000360894) (hcpA) prepilin peptidase-dependent pilin [Hemorrhagic E.coli pilus (HCP) (VF1141) - Adherence (VFC0001)] [Escherichia coli O103:H2 str. 12009]																				1
VFG045950(gb|WP_000360895) (hcpA) prepilin peptidase-dependent pilin [Hemorrhagic E.coli pilus (HCP) (VF1141) - Adherence (VFC0001)] [Escherichia coli O104:H4 str. 2009EL-2050]		1	1							1					1				1				1
VFG045956(gb|WP_000360914) (hcpA) prepilin peptidase-dependent pilin [Hemorrhagic E.coli pilus (HCP) (VF1141) - Adherence (VFC0001)] [Escherichia coli 536]																										1
VFG045962(gb|WP_000360904) (hcpA) prepilin peptidase-dependent pilin [Hemorrhagic E.coli pilus (HCP) (VF1141) - Adherence (VFC0001)] [Escherichia coli O17:K52:H18 str. UMN026]											1							1
VFG045974(gb|WP_001025145) (hcpB) type II secretion system protein GspE [Hemorrhagic E.coli pilus (HCP) (VF1141) - Adherence (VFC0001)] [Escherichia coli VR50]					1	1	1					1													1
VFG045975 (hcpB) type II secretion system protein GspE [Hemorrhagic E.coli pilus (HCP) (VF1141) - Adherence (VFC0001)] [Escherichia coli O25b:H4-ST131]																			0.997114
VFG045984(gb|WP_001025155) (hcpB) type II secretion system protein GspE [Hemorrhagic E.coli pilus (HCP) (VF1141) - Adherence (VFC0001)] [Escherichia coli O103:H2 str. 12009]				1				1.00072	1				1	1						1
VFG045987(gb|WP_001025173) (hcpB) type II secretion system protein GspE [Hemorrhagic E.coli pilus (HCP) (VF1141) - Adherence (VFC0001)] [Escherichia coli O104:H4 str. 2009EL-2050]		1								1					1
VFG045991(gb|WP_001025168) (hcpB) type II secretion system protein GspE [Hemorrhagic E.coli pilus (HCP) (VF1141) - Adherence (VFC0001)] [Escherichia coli O44:H18 042]											1								1.00072
VFG045992(gb|WP_001025180) (hcpB) type II secretion system protein GspE [Hemorrhagic E.coli pilus (HCP) (VF1141) - Adherence (VFC0001)] [Escherichia coli CFT073]																			0.998557							1
VFG045998(gb|WP_001025179) (hcpB) type II secretion system protein GspE [Hemorrhagic E.coli pilus (HCP) (VF1141) - Adherence (VFC0001)] [Escherichia coli NA114]		1.01754						1					1.0307													1.00439
VFG046007(gb|WP_001025173) (hcpB) type II secretion system protein GspE [Hemorrhagic E.coli pilus (HCP) (VF1141) - Adherence (VFC0001)] [Escherichia coli O78:H18 str. WS3294A]			1													1					1		1	0.999278
VFG046011(gb|WP_000157266) (hcpC) protein transport protein HofC [Hemorrhagic E.coli pilus (HCP) (VF1141) - Adherence (VFC0001)] [Escherichia coli VR50]				1	1	1	1					1	1	1		1	1	1			1			1	1
VFG046022(gb|WP_000157234) (hcpC) protein transport protein HofC [Hemorrhagic E.coli pilus (HCP) (VF1141) - Adherence (VFC0001)] [Escherichia coli O103:H2 str. 12009]																				1
VFG046023(gb|WP_000157234) (hcpC) protein transport protein HofC [Hemorrhagic E.coli pilus (HCP) (VF1141) - Adherence (VFC0001)] [Escherichia coli O111:H- str. 11128]								1	1
VFG046029(gb|WP_000157287) (hcpC) protein transport protein HofC [Hemorrhagic E.coli pilus (HCP) (VF1141) - Adherence (VFC0001)] [Escherichia coli O44:H18 042]											1
VFG046030(gb|WP_000157242) (hcpC) protein transport protein HofC [Hemorrhagic E.coli pilus (HCP) (VF1141) - Adherence (VFC0001)] [Escherichia coli CFT073]																										1
VFG046044(gb|WP_000157227) (hcpC) protein transport protein HofC [Hemorrhagic E.coli pilus (HCP) (VF1141) - Adherence (VFC0001)] [Escherichia coli O78:H18 str. WS3294A]		1	1							1					1								1
VFG046068(gb|WP_001189321) (cgsG) curli production assembly/transport protein CsgG [Curli fibers (VF1138) - Adherence (VFC0001)] [Escherichia coli VR50]				1	1	1	1					1	1	1		1	1	1			1			1	1
VFG046069(gb|WP_001264088) (cgsF) curli production assembly/transport protein CsgF [Curli fibers (VF1138) - Adherence (VFC0001)] [Escherichia coli VR50]				1	1	1	0.973621					0.968825	1	1		1	1	0.983213			1			1	1
VFG046070(gb|WP_000833288) (cgsE) curli production assembly/transport protein CsgE [Curli fibers (VF1138) - Adherence (VFC0001)] [Escherichia coli VR50]		1	1	1	1	1		1	1	1			1	1		1	1			1	1		1	1	1
VFG046071(gb|WP_000481509) (cgsD) transcriptional regulator CsgD [Curli fibers (VF1138) - Adherence (VFC0001)] [Escherichia coli VR50]				1	1	1							1	1		1	1		1		1			1	1
VFG046072(gb|WP_001336548) (csgB) curlin minor subunit CsgB [Curli fibers (VF1138) - Adherence (VFC0001)] [Escherichia coli VR50]	1							1
VFG046073(gb|WP_000771443) (csgA) curlin major subunit CsgA [Curli fibers (VF1138) - Adherence (VFC0001)] [Escherichia coli VR50]		1.00662	1.00662	1.00662	1.00662	1.00662	1.00662	1.00662	1.00662	1.00662		1.00662	1.00662	1.00662	1.00662	1.00662	1.00662	1.00662		1.00662	1.00662		1.00662	1.00662	1.00662
VFG046074(gb|WP_001094299) (csgC) curli assembly protein CsgC [Curli fibers (VF1138) - Adherence (VFC0001)] [Escherichia coli VR50]	1		1	1	1	1	1					1	1	1		1	1				1		0.996997	1	1
VFG050211(gb|WP_010968279) (cna) collagen adhesin [Cna (VF0730) - Adherence (VFC0001)] [Clostridium perfringens str. 13]																								0.990748
VFG001443(gb|AAF37887) (ompA) outer membrane protein A [OmpA (VF0236) - Invasion (VFC0083)] [Escherichia coli O18:K1:H7 str. RS218]																										1
VFG001444(gb|AAG10151) (aslA) putative arylsulfatase [AslA (VF0238) - Invasion (VFC0083)] [Escherichia coli O18:K1:H7 str. RS218]	1.0007			1.0007	1.0007	1.0007	1.0007				1.0007	1.0007	1.0007	1.0007		1.0007	1.0007		1.0007		1.0007	1.0007		1.0007	1.0007	1.0007
VFG001445(gb|AAA92657) (AAA92657) unknown protein [TraJ (VF0241) - Invasion (VFC0083)] [Escherichia coli]					0.99835	0.99835											0.99835			1.0198		0.99835
VFG012353(gb|WP_001045028) (tia) outer membrane beta-barrel protein [Tia/Hek (VF1109) - Invasion (VFC0083)] [Escherichia coli 536]				1.0081									1.0081	1.0081								1	0.99865			1
VFG012355(gb|WP_001350744) (tia) invasion outer membrane protein Tia [Tia/Hek (VF1109) - Invasion (VFC0083)] [Escherichia coli APEC O1]																						1
VFG033411(gb|WP_000397942) (ibeA) invasion protein IbeA [Ibes (VF0237) - Invasion (VFC0083)] [Escherichia coli O83:H1 str. LF82]																										1
VFG033413(gb|WP_001477155) (tia) outer membrane beta-barrel protein [Tia/Hek (VF1109) - Invasion (VFC0083)] [Escherichia coli 55989]							1
VFG033414(gb|WP_001403203) (tia) outer membrane beta-barrel protein [Tia/Hek (VF1109) - Invasion (VFC0083)] [Escherichia coli O44:H18 042]																						0.983806
VFG033417(gb|WP_001398114) (tia) outer membrane beta-barrel protein [Tia/Hek (VF1109) - Invasion (VFC0083)] [Escherichia coli NA114]	1		1
VFG033418(gb|WP_001536427) (tia) invasion outer membrane protein Tia [Tia/Hek (VF1109) - Invasion (VFC0083)] [Escherichia coli O78:H11:K80 str. H10407]					1	1
VFG034651(gb|WP_000074211) (ibeB) Cu(+)/Ag(+) efflux RND transporter outer membrane channel CusC [Ibes (VF0237) - Invasion (VFC0083)] [Escherichia coli CFT073]																										1
VFG034652(gb|WP_000074204) (ibeB) Cu(+)/Ag(+) efflux RND transporter outer membrane channel CusC [Ibes (VF0237) - Invasion (VFC0083)] [Escherichia coli O157:H7 str. EDL933]	1																		1			1
VFG034663(gb|WP_000074237) (ibeB) Cu(+)/Ag(+) efflux RND transporter outer membrane channel CusC [Ibes (VF0237) - Invasion (VFC0083)] [Escherichia coli O103:H2 str. 12009]																				1
VFG034666(gb|WP_000074237) (ibeB) Cu(+)/Ag(+) efflux RND transporter outer membrane channel CusC [Ibes (VF0237) - Invasion (VFC0083)] [Escherichia coli O104:H4 str. 2009EL-2050]		1						1	1	1					1			1					1		1
VFG034670(gb|WP_000074194) (ibeB) Cu(+)/Ag(+) efflux RND transporter outer membrane channel CusC [Ibes (VF0237) - Invasion (VFC0083)] [Escherichia coli O44:H18 042]											1
VFG034677(gb|WP_000074234) (ibeB) Cu(+)/Ag(+) efflux RND transporter outer membrane channel CusC [Ibes (VF0237) - Invasion (VFC0083)] [Escherichia coli O78:H11:K80 str. H10407]				1			1					1	1	1		1	1				1			1
VFG034678(gb|WP_000074228) (ibeB) Cu(+)/Ag(+) efflux RND transporter outer membrane channel CusC [Ibes (VF0237) - Invasion (VFC0083)] [Escherichia coli UMNK88]					1	1
VFG034682(gb|WP_000074237) (ibeB) Cu(+)/Ag(+) efflux RND transporter outer membrane channel CusC [Ibes (VF0237) - Invasion (VFC0083)] [Escherichia coli O78:H18 str. WS3294A]			1
VFG034690(gb|WP_000556298) (ibeC) phosphoethanolamine transferase CptA [Ibes (VF0237) - Invasion (VFC0083)] [Escherichia coli 536]																										1
VFG034695(gb|WP_000556286) (ibeC) phosphoethanolamine transferase CptA [Ibes (VF0237) - Invasion (VFC0083)] [Escherichia coli O55:H7 str. CB9615]	1																		1			1
VFG034703(gb|WP_000556293) (ibeC) phosphoethanolamine transferase CptA [Ibes (VF0237) - Invasion (VFC0083)] [Escherichia coli O103:H2 str. 12009]																				1
VFG034712(gb|WP_000556276) (ibeC) phosphoethanolamine transferase CptA [Ibes (VF0237) - Invasion (VFC0083)] [Escherichia coli O44:H18 042]											1
VFG034718(gb|WP_000556280) (ibeC) phosphoethanolamine transferase CptA [Ibes (VF0237) - Invasion (VFC0083)] [Escherichia coli E24377A]		1						1	1	1					1			1					1
VFG034719(gb|WP_000556306) (ibeC) phosphoethanolamine transferase CptA [Ibes (VF0237) - Invasion (VFC0083)] [Escherichia coli O78:H11:K80 str. H10407]				1			1					1	1	1		1	1				1			1	1
VFG034720(gb|WP_000556277) (ibeC) phosphoethanolamine transferase CptA [Ibes (VF0237) - Invasion (VFC0083)] [Escherichia coli UMNK88]					1	1
VFG034724(gb|WP_000556293) (ibeC) phosphoethanolamine transferase CptA [Ibes (VF0237) - Invasion (VFC0083)] [Escherichia coli O78:H18 str. WS3294A]			1
VFG050157(gb|WP_001331698) (kpsF) Polysialic acid capsule expression protein [K1 capsule (VF0239) - Invasion (VFC0083)] [Escherichia coli O45:K1:H7 str. S88]																										1
VFG050158(gb|WP_000905916) (kpsE) Capsule polysaccharide export inner-membrane protein [K1 capsule (VF0239) - Invasion (VFC0083)] [Escherichia coli O45:K1:H7 str. S88]																										1
VFG050159(gb|WP_001331697) (kpsD) Polysialic acid transport protein precursor [K1 capsule (VF0239) - Invasion (VFC0083)] [Escherichia coli O45:K1:H7 str. S88]																										1
VFG050160(gb|WP_000030755) (kpsU) 3-deoxy-manno-octulosonate cytidylyltransferase [K1 capsule (VF0239) - Invasion (VFC0083)] [Escherichia coli O45:K1:H7 str. S88]																										1
VFG050161(gb|WP_000579525) (kpsC) Capsule polysaccharide export protein [K1 capsule (VF0239) - Invasion (VFC0083)] [Escherichia coli O45:K1:H7 str. S88]																										1
VFG050162(gb|WP_001161829) (kpsS) Capsule polysaccharide export protein [K1 capsule (VF0239) - Invasion (VFC0083)] [Escherichia coli O45:K1:H7 str. S88]				1.00083									1.00083	1.00083												0.999171
VFG000830(gb|WP_001301632) (cesAB) chaperone for EspA and EspB [TTSS (VF0191) - Effector delivery system (VFC0086)] [Escherichia coli O157:H7 str. EDL933]																		1
VFG002046(gb|WP_000135089) (gspC) general secretion pathway protein C [T2SS (VF0333) - Effector delivery system (VFC0086)] [Shigella dysenteriae Sd197]																		1.00833		1		1
VFG002047(gb|WP_000498818) (gspD) general secretion pathway protein D [T2SS (VF0333) - Effector delivery system (VFC0086)] [Shigella dysenteriae Sd197]	1.00733																		1.00733			1.00733
VFG002049(gb|WP_001173470) (gspF) general secretion pathway protein F [T2SS (VF0333) - Effector delivery system (VFC0086)] [Shigella dysenteriae Sd197]	1														1	1.005	1		1		1	1			1
VFG002050(gb|WP_001087302) (gspG) general secretion pathway protein G [T2SS (VF0333) - Effector delivery system (VFC0086)] [Shigella dysenteriae Sd197]							1				1	1			1	1	1	1	1.00877		1				1
VFG002051(gb|WP_001115126) (gspH) general secretion pathway protein H [T2SS (VF0333) - Effector delivery system (VFC0086)] [Shigella dysenteriae Sd197]	1										1						1		1		1	1
VFG002052(gb|WP_000820136) (gspI) general secretion pathway protein I [T2SS (VF0333) - Effector delivery system (VFC0086)] [Shigella dysenteriae Sd197]	1																					1			1
VFG002053(gb|WP_001250462) (gspJ) general secretion pathway protein J [T2SS (VF0333) - Effector delivery system (VFC0086)] [Shigella dysenteriae Sd197]	1			1.0165									1.0132	1
VFG002054(gb|WP_000633233) (gspK) general secretion pathway protein K [T2SS (VF0333) - Effector delivery system (VFC0086)] [Shigella dysenteriae Sd197]	1	1	1					1	1	1	1				1				1	1		1				1
VFG002055(gb|WP_000097229) (gspL) general secretion pathway protein L [T2SS (VF0333) - Effector delivery system (VFC0086)] [Shigella dysenteriae Sd197]	1														0.988974				1			1
VFG002056 (gspM) general secretion pathway protein M [T2SS (VF0333) - Effector delivery system (VFC0086)] [Shigella dysenteriae Sd197]	1		1	1							1		1	1		1	1		1		1	1		1	1
VFG012865 (ipaH) invasion plasmid antigen IpaH [TTSS secreted effectors (VF0978) - Effector delivery system (VFC0086)] [Shigella flexneri 2a str. 301]	1.05801	1.00436		1.01375			1.01442			1.00369	1.04259	1.00335	1.03253	1.02783		0.935278		1.00101				1.02113		0.999329	1
VFG012870 (ipaH) invasion plasmid antigen IpaH [TTSS secreted effectors (VF0978) - Effector delivery system (VFC0086)] [Shigella flexneri 2a str. 2457T]	1.02195										1.01983								1.00283			1.01771
VFG012894 (gspC) general secretion pathway protein C [T2SS (VF0333) - Effector delivery system (VFC0086)] [Shigella boydii Sb227]	1.0012	1.0012		1.0012		1.0012		1.0012	1.0012	1.0012	1.0012		1.0012	1.0012	1.0012	1.01807	1.0012	1.0012	1.0012	1.0012	1.0012	0.995181		1.0012	1.0012
VFG012896 (gspD) general secretion pathway protein D [T2SS (VF0333) - Effector delivery system (VFC0086)] [Shigella boydii Sb227]		1								1					1					1
VFG012898 (gspE) general secretion pathway protein E [T2SS (VF0333) - Effector delivery system (VFC0086)] [Shigella boydii Sb227]							1.00067				1.00067	1.00067			1.00067				1.00067			1.00067			1.00067	1.00067
VFG012900(gb|WP_001173438) (gspF) general secretion pathway protein F [T2SS (VF0333) - Effector delivery system (VFC0086)] [Shigella boydii Sb227]							1					1														1
VFG012904(gb|WP_001115132) (gspH) general secretion pathway protein H [T2SS (VF0333) - Effector delivery system (VFC0086)] [Shigella boydii Sb227]				1.002				1			0.97006		1.002	1.002	1.01198	1	1	1		1	1				1	1
VFG012906(gb|WP_000820139) (gspI) general secretion pathway protein I [T2SS (VF0333) - Effector delivery system (VFC0086)] [Shigella boydii Sb227]		1		1						1					1		1				1				0.997312
VFG012908(gb|WP_001255034) (gspJ) general secretion pathway protein J [T2SS (VF0333) - Effector delivery system (VFC0086)] [Shigella boydii Sb227]																1		1				1		1
VFG012910(gb|WP_000633205) (gspK) general secretion pathway protein K [T2SS (VF0333) - Effector delivery system (VFC0086)] [Shigella boydii Sb227]				1			1					1	1	1		1	1	1			1			1	1
VFG012912(gb|WP_000094969) (gspL) general secretion pathway protein L [T2SS (VF0333) - Effector delivery system (VFC0086)] [Shigella boydii Sb227]							1					1				1.01272	1	1						1
VFG020153 (gspE) general secretion pathway protein E [T2SS (VF0333) - Effector delivery system (VFC0086)] [Shigella boydii CDC 3083-94]	1.00067															1.00067
VFG020155(gb|WP_001087282) (gspG) general secretion pathway protein G [T2SS (VF0333) - Effector delivery system (VFC0086)] [Shigella boydii CDC 3083-94]		0.995614	1	1	1	1			0.940789				1	1		1.03509
VFG020156(gb|WP_001115135) (gspH) general secretion pathway protein H [T2SS (VF0333) - Effector delivery system (VFC0086)] [Shigella boydii CDC 3083-94]		1.00709							1.00177						1	1	1.00709				1.00887				1.01241
VFG020161(gb|WP_000942800) (gspM) general secretion pathway protein M [T2SS (VF0333) - Effector delivery system (VFC0086)] [Shigella boydii CDC 3083-94]					1	1	1					1		1		1	1	1			1				1	1
VFG033064(gb|WP_000627899) (eae) intimin type gamma [Intimin (VF0202) - Effector delivery system (VFC0086)] [Escherichia coli O111:H- str. 11128]																		1
VFG033065(gb|WP_000627895) (eae) intimin type beta [Intimin (VF0202) - Effector delivery system (VFC0086)] [Escherichia coli O26:H11 str. 11368]																			1	1
VFG033427(gb|WP_000245867) (escG) chaperone for EscF [TTSS (VF0191) - Effector delivery system (VFC0086)] [Escherichia coli O103:H2 str. 12009]																			1	1
VFG033428(gb|WP_000245865) (escG) chaperone for EscF [TTSS (VF0191) - Effector delivery system (VFC0086)] [Escherichia coli O111:H- str. 11128]																		1
VFG033436(gb|WP_001053840) (escF) Type III secretion system needle filament protein EscF [TTSS (VF0191) - Effector delivery system (VFC0086)] [Escherichia coli O103:H2 str. 12009]																			1	1
VFG033437(gb|WP_001053840) (escF) Type III secretion system needle filament protein EscF [TTSS (VF0191) - Effector delivery system (VFC0086)] [Escherichia coli O111:H- str. 11128]																		1
VFG033445(gb|WP_000228587) (cesD2) chaperone for EspD [TTSS (VF0191) - Effector delivery system (VFC0086)] [Escherichia coli O103:H2 str. 12009]																			1	1
VFG033446(gb|WP_000228585) (cesD2) chaperone for EspD [TTSS (VF0191) - Effector delivery system (VFC0086)] [Escherichia coli O111:H- str. 11128]																		1
VFG033455(gb|WP_001091995) (espB) Type III secretion system translocator protein EspB, pore protein [TTSS (VF0191) - Effector delivery system (VFC0086)] [Escherichia coli O111:H- str. 11128]																		1
VFG033456(gb|WP_001092012) (espB) Type III secretion system translocator protein EspB, pore protein [TTSS (VF0191) - Effector delivery system (VFC0086)] [Escherichia coli O26:H11 str. 11368]																			1	1
VFG033464(gb|WP_000935772) (espD) Type III secretion system translocator protein EspD, pore protein [TTSS (VF0191) - Effector delivery system (VFC0086)] [Escherichia coli O111:H- str. 11128]																		1
VFG033465(gb|WP_000935768) (espD) Type III secretion system translocator protein EspD, pore protein [TTSS (VF0191) - Effector delivery system (VFC0086)] [Escherichia coli O26:H11 str. 11368]																			1	1
VFG033473(gb|WP_000380337) (espA) Type III secretion system translocator protein EspA [TTSS (VF0191) - Effector delivery system (VFC0086)] [Escherichia coli O111:H- str. 11128]																		1
VFG033474(gb|WP_000381555) (espA) Type III secretion system translocator protein EspA [TTSS (VF0191) - Effector delivery system (VFC0086)] [Escherichia coli O26:H11 str. 11368]																			1	1
VFG033481(gb|WP_001273455) (sepL) Type III secretion system secretion gatekeeper SepL [TTSS (VF0191) - Effector delivery system (VFC0086)] [Escherichia coli O103:H2 str. 12009]																			0.993371
VFG033482(gb|WP_001273452) (sepL) Type III secretion system secretion gatekeeper SepL [TTSS (VF0191) - Effector delivery system (VFC0086)] [Escherichia coli O111:H- str. 11128]																		1
VFG033483(gb|WP_001273459) (sepL) Type III secretion system secretion gatekeeper SepL [TTSS (VF0191) - Effector delivery system (VFC0086)] [Escherichia coli O26:H11 str. 11368]																			1	1
VFG033491(gb|WP_000953240) (escD) Type III secretion system outer MS ring protein EscD [TTSS (VF0191) - Effector delivery system (VFC0086)] [Escherichia coli O111:H- str. 11128]																		1
VFG033492(gb|WP_000953242) (escD) Type III secretion system outer MS ring protein EscD [TTSS (VF0191) - Effector delivery system (VFC0086)] [Escherichia coli O26:H11 str. 11368]																			1	1
VFG033499(gb|WP_000098786) (cesT) multieffector chaperone [TTSS (VF0191) - Effector delivery system (VFC0086)] [Escherichia coli O103:H2 str. 12009]																			1	1
VFG033500(gb|WP_000098792) (cesT) multieffector chaperone [TTSS (VF0191) - Effector delivery system (VFC0086)] [Escherichia coli O111:H- str. 11128]																		1
VFG033509(gb|WP_001005217) (cesF) CesF, chaperone for EspF [TTSS (VF0191) - Effector delivery system (VFC0086)] [Escherichia coli O111:H- str. 11128]																		1
VFG033510(gb|WP_001005230) (cesF) CesF, chaperone for EspF [TTSS (VF0191) - Effector delivery system (VFC0086)] [Escherichia coli O26:H11 str. 11368]																			1	1
VFG033518(gb|WP_000803681) (sepQ/escQ) Type III secetion system C ring protein EscQ [TTSS (VF0191) - Effector delivery system (VFC0086)] [Escherichia coli O111:H- str. 11128]																		1
VFG033519(gb|WP_001050796) (sepQ/escQ) Type III secetion system C ring protein EscQ [TTSS (VF0191) - Effector delivery system (VFC0086)] [Escherichia coli O26:H11 str. 11368]																			1	1
VFG033524(gb|WP_001443671) (escP) Type III secretion system needle length regulator EscP [TTSS (VF0191) - Effector delivery system (VFC0086)] [Escherichia coli O103:H2 str. 12009]																			1	1
VFG033525(gb|WP_001444601) (escP) Type III secretion system needle length regulator EscP [TTSS (VF0191) - Effector delivery system (VFC0086)] [Escherichia coli O111:H- str. 11128]																		1
VFG033534(gb|WP_001062955) (escO) positive regulator EscO [TTSS (VF0191) - Effector delivery system (VFC0086)] [Escherichia coli O111:H- str. 11128]																		1
VFG033535(gb|WP_001062953) (escO) positive regulator EscO [TTSS (VF0191) - Effector delivery system (VFC0086)] [Escherichia coli O26:H11 str. 11368]																			1	1
VFG033543(gb|WP_000622549) (escN) ATPase EscN [TTSS (VF0191) - Effector delivery system (VFC0086)] [Escherichia coli O111:H- str. 11128]																		1
VFG033544(gb|WP_000599710) (escN) ATPase EscN [TTSS (VF0191) - Effector delivery system (VFC0086)] [Escherichia coli O26:H11 str. 11368]																			1	1
VFG033552(gb|WP_001037822) (escV) Type III secretion system major export apparatus protein [TTSS (VF0191) - Effector delivery system (VFC0086)] [Escherichia coli O111:H- str. 11128]																		1
VFG033553(gb|WP_001037820) (escV) Type III secretion system major export apparatus protein [TTSS (VF0191) - Effector delivery system (VFC0086)] [Escherichia coli O26:H11 str. 11368]																			1	1
VFG033560(gb|WP_001050992) (cesL) chaperone for SepL [TTSS (VF0191) - Effector delivery system (VFC0086)] [Escherichia coli O111:H- str. 11128]																		1
VFG033561(gb|WP_001050414) (cesL) chaperone for SepL [TTSS (VF0191) - Effector delivery system (VFC0086)] [Escherichia coli O26:H11 str. 11368]																			1	1
VFG033568(gb|WP_001059800) (escI) Type III secretion system inner rod component EscI [TTSS (VF0191) - Effector delivery system (VFC0086)] [Escherichia coli O111:H- str. 11128]																		1
VFG033569(gb|WP_001059795) (escI) Type III secretion system inner rod component EscI [TTSS (VF0191) - Effector delivery system (VFC0086)] [Escherichia coli O26:H11 str. 11368]																			1	1
VFG033576(gb|WP_001233824) (escJ) Type III secretion system inner MS ring protein EscJ [TTSS (VF0191) - Effector delivery system (VFC0086)] [Escherichia coli O103:H2 str. 12009]																			1	1
VFG033577(gb|WP_000716189) (escJ) Type III secretion system inner MS ring protein EscJ [TTSS (VF0191) - Effector delivery system (VFC0086)] [Escherichia coli O111:H- str. 11128]																		1
VFG033584(gb|WP_001063688) (sepD) Type III secretion system secretion switch protein SepD [TTSS (VF0191) - Effector delivery system (VFC0086)] [Escherichia coli O103:H2 str. 12009]																			1	1
VFG033585(gb|WP_001063680) (sepD) Type III secretion system secretion switch protein SepD [TTSS (VF0191) - Effector delivery system (VFC0086)] [Escherichia coli O111:H- str. 11128]																		1
VFG033593(gb|WP_000723928) (escC) Type III secretion system secretin EscC [TTSS (VF0191) - Effector delivery system (VFC0086)] [Escherichia coli O103:H2 str. 12009]																			1	1
VFG033594(gb|WP_000723934) (escC) Type III secretion system secretin EscC [TTSS (VF0191) - Effector delivery system (VFC0086)] [Escherichia coli O111:H- str. 11128]																		1
VFG033601(gb|WP_000087469) (cesD) chaperone for EspB and EspD [TTSS (VF0191) - Effector delivery system (VFC0086)] [Escherichia coli O103:H2 str. 12009]																			1	1
VFG033602(gb|WP_000087467) (cesD) chaperone for EspB and EspD [TTSS (VF0191) - Effector delivery system (VFC0086)] [Escherichia coli O111:H- str. 11128]																		1
VFG033604(gb|WP_000444178) (glrA) type III secretion system LEE transcriptional regulator GrlA [TTSS (VF0172) - Effector delivery system (VFC0086)] [Escherichia coli O127:H6 str. E2348/69]																		1
VFG033609(gb|WP_000444181) (glrA) type III secretion system LEE transcriptional regulator GrlA [TTSS (VF0191) - Effector delivery system (VFC0086)] [Escherichia coli O103:H2 str. 12009]																			1	1
VFG033619(gb|WP_000605365) (glrR) type III secretion system LEE GrlA-binding negative regulator GrlR [TTSS (VF0191) - Effector delivery system (VFC0086)] [Escherichia coli O111:H- str. 11128]																		1
VFG033620(gb|WP_000605356) (glrR) nucleoside transporter [TTSS (VF0191) - Effector delivery system (VFC0086)] [Escherichia coli O26:H11 str. 11368]																			1	1
VFG033627(gb|WP_001342442) (etgA) T3SS-associated peptidoglycan lytic enzyme [TTSS (VF0191) - Effector delivery system (VFC0086)] [Escherichia coli O103:H2 str. 12009]																			1	1
VFG033628(gb|WP_000720636) (etgA) T3SS-associated peptidoglycan lytic enzyme [TTSS (VF0191) - Effector delivery system (VFC0086)] [Escherichia coli O111:H- str. 11128]																		1
VFG033636(gb|WP_001291686) (escU) Type III secretion system export apparatus switch protein EscU [TTSS (VF0191) - Effector delivery system (VFC0086)] [Escherichia coli O103:H2 str. 12009]																			1	1
VFG033637(gb|WP_001291693) (escU) Type III secretion system export apparatus switch protein EscU [TTSS (VF0191) - Effector delivery system (VFC0086)] [Escherichia coli O111:H- str. 11128]																		1
VFG033645(gb|WP_001002808) (escT) Type III secretion system minor export apparatus protein EscT [TTSS (VF0191) - Effector delivery system (VFC0086)] [Escherichia coli O103:H2 str. 12009]																			1	1
VFG033646(gb|WP_001002833) (escT) Type III secretion system minor export apparatus protein EscT [TTSS (VF0191) - Effector delivery system (VFC0086)] [Escherichia coli O111:H- str. 11128]																		1
VFG033654(gb|WP_000447503) (escS) Type III secretion systemminor export apparatus protein EscS [TTSS (VF0191) - Effector delivery system (VFC0086)] [Escherichia coli O103:H2 str. 12009]																			1	1
VFG033655(gb|WP_000379425) (escS) Type III secretion systemminor export apparatus protein EscS [TTSS (VF0191) - Effector delivery system (VFC0086)] [Escherichia coli O111:H- str. 11128]																		1
VFG033657(gb|WP_001299599) (escR) Type III secretion systemminor export apparatus protein EscR [TTSS (VF0172) - Effector delivery system (VFC0086)] [Escherichia coli O127:H6 str. E2348/69]																		1
VFG033663(gb|WP_001299990) (escR) Type III secretion systemminor export apparatus protein EscR [TTSS (VF0191) - Effector delivery system (VFC0086)] [Escherichia coli O103:H2 str. 12009]																			1	1
VFG033672(gb|WP_000780745) (escL) negative regulator EscL, stator protein [TTSS (VF0191) - Effector delivery system (VFC0086)] [Escherichia coli O103:H2 str. 12009]																			1	1
VFG033673(gb|WP_000780684) (escL) negative regulator EscL, stator protein [TTSS (VF0191) - Effector delivery system (VFC0086)] [Escherichia coli O111:H- str. 11128]																		1
VFG033681(gb|WP_000153999) (escK) type III secretion system sorting platform component [TTSS (VF0191) - Effector delivery system (VFC0086)] [Escherichia coli O103:H2 str. 12009]																			1	1
VFG033682(gb|WP_000151816) (escK) type III secretion system sorting platform component [TTSS (VF0191) - Effector delivery system (VFC0086)] [Escherichia coli O111:H- str. 11128]																		1
VFG033690(gb|WP_000084152) (cesAB) chaperone for EspA and EspB [TTSS (VF0191) - Effector delivery system (VFC0086)] [Escherichia coli O103:H2 str. 12009]																			1	1
VFG033693(gb|WP_000628731) (escE) chaperone for EscF [TTSS (VF0172) - Effector delivery system (VFC0086)] [Escherichia coli O127:H6 str. E2348/69]																		1
VFG033699(gb|WP_000628726) (escE) chaperone for EscF [TTSS (VF0191) - Effector delivery system (VFC0086)] [Escherichia coli O103:H2 str. 12009]																			1	1
VFG033717(gb|WP_000830675) (rorf1) SdiA-regulated domain-containing protein [TTSS (VF0191) - Effector delivery system (VFC0086)] [Escherichia coli O103:H2 str. 12009]																			1	1
VFG033718(gb|WP_000823907) (rorf1) SdiA-regulated domain-containing protein [TTSS (VF0191) - Effector delivery system (VFC0086)] [Escherichia coli O111:H- str. 11128]																		1
VFG033726(gb|WP_000606964) (espG) Type III secretion system effector EspG, GTPase activating protein [TTSS secreted effectors (VF1110) - Effector delivery system (VFC0086)] [Escherichia coli O103:H2 str. 12009]																			1	1
VFG033727(gb|WP_001358534) (espG) Type III secretion system effector EspG, GTPase activating protein [TTSS secreted effectors (VF1110) - Effector delivery system (VFC0086)] [Escherichia coli O111:H- str. 11128]																		1
VFG033735(gb|WP_001444602) (espH) Type III secretion system effector EspH, RhoGEF Inhibitor [TTSS secreted effectors (VF1110) - Effector delivery system (VFC0086)] [Escherichia coli O111:H- str. 11128]																		1
VFG033736(gb|WP_001360071) (espH) Type III secretion system effector EspH, RhoGEF Inhibitor [TTSS secreted effectors (VF1110) - Effector delivery system (VFC0086)] [Escherichia coli O26:H11 str. 11368]																			1	1
VFG033743(gb|WP_001368749) (espF) Type III secretion system effector EspF [TTSS secreted effectors (VF1110) - Effector delivery system (VFC0086)] [Escherichia coli O103:H2 str. 12009]																			0.964972
VFG033744(gb|WP_001369486) (espF) Type III secretion system effector EspF [TTSS secreted effectors (VF1110) - Effector delivery system (VFC0086)] [Escherichia coli O111:H- str. 11128]																		1.01141
VFG033745(gb|WP_001443729) (espF) Type III secretion system effector EspF [TTSS secreted effectors (VF1110) - Effector delivery system (VFC0086)] [Escherichia coli O26:H11 str. 11368]																			1	1
VFG033753(gb|WP_001369484) (tir) translocated intimin receptor protein [TTSS secreted effectors (VF1110) - Effector delivery system (VFC0086)] [Escherichia coli O111:H- str. 11128]																		1
VFG033754(gb|WP_001121330) (tir) translocated intimin receptor protein [TTSS secreted effectors (VF1110) - Effector delivery system (VFC0086)] [Escherichia coli O26:H11 str. 11368]																			1	1
VFG033762(gb|WP_000492696) (map) Type III secretion system effector Map, Rho guanine exchange factor [TTSS secreted effectors (VF1110) - Effector delivery system (VFC0086)] [Escherichia coli O111:H- str. 11128]																		1
VFG033763(gb|WP_000492643) (map) Type III secretion system effector Map, Rho guanine exchange factor [TTSS secreted effectors (VF1110) - Effector delivery system (VFC0086)] [Escherichia coli O26:H11 str. 11368]																			1	1
VFG033770(gb|WP_000386952) (sepZ/espZ) Type III secretion system effector EspZ [TTSS secreted effectors (VF1110) - Effector delivery system (VFC0086)] [Escherichia coli O111:H- str. 11128]																		1
VFG033771(gb|WP_000338348) (sepZ/espZ) Type III secretion system effector EspZ [TTSS secreted effectors (VF1110) - Effector delivery system (VFC0086)] [Escherichia coli O26:H11 str. 11368]																			1	1
VFG033772 (cif) Type III secretion system effector Cif, cyclomodulin [TTSS secreted effectors (VF1111) - Effector delivery system (VFC0086)] [Escherichia coli O127:H6 str. E2348/69]																		0.984709	0.908257	0.908257
VFG033779(gb|WP_001121571) (espJ) Type III secretion system effector EspJ, adenosine diphosphate (ADP) ribosyltransferase [TTSS secreted effectors (VF1111) - Effector delivery system (VFC0086)] [Escherichia coli O127:H6 str. E2348/69]																		1	1	1
VFG033787(gb|WP_001025663) (nleA/espI) Type III secretion system effector NleA [TTSS secreted effectors (VF1111) - Effector delivery system (VFC0086)] [Escherichia coli O127:H6 str. E2348/69]																		1.00454
VFG033793(gb|WP_001102750) (nleA/espI) Type III secretion system effector NleA [TTSS secreted effectors (VF1110) - Effector delivery system (VFC0086)] [Escherichia coli O103:H2 str. 12009]																			1.00242	1
VFG033794(gb|WP_001025665) (nleA/espI) Type III secretion system effector NleA [TTSS secreted effectors (VF1110) - Effector delivery system (VFC0086)] [Escherichia coli O111:H- str. 11128]																		0.989418
VFG033809(gb|WP_001034126) (vat) vacuolating autotransporter toxin [Vat (VF1112) - Effector delivery system (VFC0086)] [Escherichia coli O104:H4 str. 2009EL-2050]				0.999267			0.999756				0.999267	0.999267	0.999267	0.999267		0.930403	0.999267	0.999267	0.999267	0.999267	1.00171			0.999267	0.994872
VFG033810 (vat) vacuolating autotransporter toxin [Vat (VF1112) - Effector delivery system (VFC0086)] [Escherichia coli O104:H4 str. 2009EL-2071]				0.998267			0.998267				0.998267	0.997689	0.998267	0.998267		0.998267	0.998267	0.998267	0.998267	0.998267	0.998267			0.998267	0.998267
VFG033817(gb|WP_001034006) (vat) vacuolating autotransporter toxin [Vat (VF1112) - Effector delivery system (VFC0086)] [Escherichia coli UM146]																										1
VFG034754(gb|WP_000081129) (espL1) Type III secretion system effector espL1 [TTSS secreted effectors (VF1110) - Effector delivery system (VFC0086)] [Escherichia coli O157:H7 str. EDL933]	1		0.984729					1.00053	1.00053	0.998947	1				0.986309	1.00053
VFG034756 (espL1) Type III secretion system effector espL1 [TTSS secreted effectors (VF1111) - Effector delivery system (VFC0086)] [Escherichia coli O55:H7 str. CB9615]		0.999473		1.00105	1.00053	1.00053	1.01739					1.01633	1.00105	1.00105			1.00105	1.00105	1.00105	0.988936	1.00105	1.00053	1.00053	1.00105	1.00053
VFG034770(gb|WP_001121747) (espL2) Type III secretion system secreted effector EspL2, cysteine protease [TTSS secreted effectors (VF1110) - Effector delivery system (VFC0086)] [Escherichia coli O111:H- str. 11128]																		1
VFG034772(gb|WP_000627910) (espL4) Type III secretion system effector EspL4 [TTSS secreted effectors (VF1110) - Effector delivery system (VFC0086)] [Escherichia coli O157:H7 str. EDL933]	1			1			1				1	1	1	1		1.0064	1		1		1	1		1	0.999543
VFG034777(gb|WP_000632878) (espL4) Type III secretion system effector EspL4 [TTSS secreted effectors (VF1110) - Effector delivery system (VFC0086)] [Escherichia coli O111:H- str. 11128]		1	0.999365	1.00698	1	1	1.00825	1	1	1	0.950476	0.993651	1.0127	1.02476	1	0.998095	1.00762	1.00063	0.954286	0.999365	1.00889	0.966349	1	1.01016	1.00571
VFG034790(gb|WP_001132157) (espM2) Type III secretion system effector EspM2, Rho guanine exchange factor [TTSS secreted effectors (VF1110) - Effector delivery system (VFC0086)] [Escherichia coli O157:H7 str. TW14359]																				0.988156
VFG034794(gb|WP_001132165) (espM2) Type III secretion system effector EspM2, Rho guanine exchange factor [TTSS secreted effectors (VF1110) - Effector delivery system (VFC0086)] [Escherichia coli O26:H11 str. 11368]																		1	1
VFG034817(gb|WP_000671691) (espR1) Type III secretion system effector espR1 [TTSS secreted effectors (VF1111) - Effector delivery system (VFC0086)] [Escherichia coli O55:H7 str. CB9615]	1.00079										1.00079								1.00079			1.00079
VFG034822(gb|WP_000627131) (espR1) Type III secretion system effector espR1 [TTSS secreted effectors (VF1110) - Effector delivery system (VFC0086)] [Escherichia coli O103:H2 str. 12009]		1						1	1	1					1			1		1			1
VFG034823(gb|WP_000627123) (espR1) Type III secretion system effector espR1 [TTSS secreted effectors (VF1110) - Effector delivery system (VFC0086)] [Escherichia coli O111:H- str. 11128]			0.999249	0.999249	0.999249	0.999249	0.999249					0.999249	0.999249	0.999249		0.999249	0.999249				0.999249			0.999249	0.999249
VFG034828(gb|WP_000484277) (espR3) Type III secretion system effector espR3 [TTSS secreted effectors (VF1110) - Effector delivery system (VFC0086)] [Escherichia coli O157:H7 str. EC4115]											0.990351
VFG034833(gb|WP_000484262) (espR4) Type III secretion system effector espR4 [TTSS secreted effectors (VF1111) - Effector delivery system (VFC0086)] [Escherichia coli O55:H7 str. RM12579]	1										0.990351								1			0.992982			0.969298
VFG034842 (espW) Type III secretion system effector EspW [TTSS secreted effectors (VF1111) - Effector delivery system (VFC0086)] [Escherichia coli O55:H7 str. CB9615]																		1.00804	1.00804	1.00804
VFG034848(gb|WP_001299273) (espW) Type III secretion system effector EspW [TTSS secreted effectors (VF1110) - Effector delivery system (VFC0086)] [Escherichia coli O26:H11 str. 11368]																		1	1.00094	1
VFG034849(gb|WP_000129338) (espX1) Type III secretion system effector EspX1 [TTSS secreted effectors (VF1110) - Effector delivery system (VFC0086)] [Escherichia coli O157:H7 str. EDL933]	1										1								1			1		0.996484
VFG034851(gb|WP_000129342) (espX1) Type III secretion system effector EspX1 [TTSS secreted effectors (VF1111) - Effector delivery system (VFC0086)] [Escherichia coli O55:H7 str. CB9615]					0.993671
VFG034856(gb|WP_000181251) (espX1) Type III secretion system effector EspX1 [TTSS secreted effectors (VF1110) - Effector delivery system (VFC0086)] [Escherichia coli O103:H2 str. 12009]			0.999297
VFG034857(gb|WP_000181242) (espX1) Type III secretion system effector EspX1 [TTSS secreted effectors (VF1110) - Effector delivery system (VFC0086)] [Escherichia coli O111:H- str. 11128]		0.998594								0.998594					0.999297
VFG034858(gb|WP_000181245) (espX1) Type III secretion system effector EspX1 [TTSS secreted effectors (VF1110) - Effector delivery system (VFC0086)] [Escherichia coli O26:H11 str. 11368]				1	0.998594	0.998594		0.999297	0.999297				1	1		1	1	0.999297		1	1		1	1
VFG034860(gb|NP_308903) (espX2) Type III secretion system effector EspX2 [TTSS secreted effectors (VF1110) - Effector delivery system (VFC0086)] [Escherichia coli O157:H7 str. Sakai]	1										1								0.990561			1
VFG034866(gb|WP_000900547) (espX4) Type III secretion system effector EspX4 [TTSS secreted effectors (VF1110) - Effector delivery system (VFC0086)] [Escherichia coli O157:H7 str. EDL933]	1	1.00063	1	1	1	1	1.0038	1	1	1.00063	1	1.00253	1	1	1.00063	1	1	0.999367	1	1	1	1	1	1	1
VFG034875(gb|WP_001270087) (espX5) Type III secretion system effector EspX5 [TTSS secreted effectors (VF1111) - Effector delivery system (VFC0086)] [Escherichia coli O55:H7 str. CB9615]	1	1	1	1	1	1	0.989946	1	1	1	1	0.996133	1	1	1	1	1	1	1	0.999227	1	1	1	1	1
VFG034882(gb|WP_000535079) (espX6) Type III secretion system effector EspX6 [TTSS secreted effectors (VF1111) - Effector delivery system (VFC0086)] [Escherichia coli O55:H7 str. CB9615]											0.948509											1.06233
VFG034883(gb|WP_000535076) (espX6) Type III secretion system effector EspX6 [TTSS secreted effectors (VF1111) - Effector delivery system (VFC0086)] [Escherichia coli O55:H7 str. RM12579]	1.04905
VFG034895(gb|WP_001304001) (espY1) Type III secretion system effector EspY1 [TTSS secreted effectors (VF1110) - Effector delivery system (VFC0086)] [Escherichia coli O157:H7 str. EDL933]							1.0996					1.0996				1.03851	1.03851				1.03851	1		1.03851
VFG034897(gb|WP_013009101) (espY1) Type III secretion system effector EspY1 [TTSS secreted effectors (VF1111) - Effector delivery system (VFC0086)] [Escherichia coli O55:H7 str. CB9615]											0.955285
VFG034901(gb|WP_000868321) (espY2) Type III secretion system effector EspY2 [TTSS secreted effectors (VF1110) - Effector delivery system (VFC0086)] [Escherichia coli O157:H7 str. EDL933]	1										1								0.994737			1
VFG034910(gb|WP_000978351) (espY3) Type III secretion system effector EspY3 [TTSS secreted effectors (VF1111) - Effector delivery system (VFC0086)] [Escherichia coli O55:H7 str. CB9615]	1																	0.991094
VFG034911(gb|WP_000978355) (espY3) Type III secretion system effector EspY3 [TTSS secreted effectors (VF1111) - Effector delivery system (VFC0086)] [Escherichia coli O55:H7 str. RM12579]											1.00064								1			1
VFG034915(gb|WP_000225947) (espY4) Type III secretion system effector EspY4 [TTSS secreted effectors (VF1110) - Effector delivery system (VFC0086)] [Escherichia coli O157:H7 str. EDL933]	1																					1
VFG034917(gb|WP_000225946) (espY4) Type III secretion system effector EspY4 [TTSS secreted effectors (VF1111) - Effector delivery system (VFC0086)] [Escherichia coli O55:H7 str. CB9615]											0.999585								1
VFG034922(gb|WP_001303732) (espY5) hypothetical protein [TTSS secreted effectors (VF1110) - Effector delivery system (VFC0086)] [Escherichia coli O157:H7 str. EDL933]											1								1.00294
VFG034923 (espY5) unknown protein [TTSS secreted effectors (VF1110) - Effector delivery system (VFC0086)] [Escherichia coli O157:H7 str. Sakai]	0.997347																		0.944297			1
VFG034940(gb|WP_000953030) (nleB1) Type III secretion system effector nleB1 [TTSS (VF0191) - Effector delivery system (VFC0086)] [Escherichia coli O111:H- str. 11128]																		1
VFG034942(gb|WP_000950813) (nleB2) Type III secretion system effector NleB2 [TTSS secreted effectors (VF1110) - Effector delivery system (VFC0086)] [Escherichia coli O157:H7 str. EDL933]																			1
VFG034953(gb|WP_000950792) (nleB2-2) type III secretion system effector arginine glycosyltransferase NleB2 [TTSS secreted effectors (VF1110) - Effector delivery system (VFC0086)] [Escherichia coli O103:H2 str. 12009]																				1
VFG034954(gb|WP_000609742) (nleE) Type III secretion system effector NleE [TTSS secreted effectors (VF1110) - Effector delivery system (VFC0086)] [Escherichia coli O157:H7 str. EDL933]																		1
VFG034965(gb|WP_000609738) (nleE-2) NleE/OspZ family T3SS effector cysteine methyltransferase [TTSS secreted effectors (VF1111) - Effector delivery system (VFC0086)] [Escherichia coli O127:H6 str. E2348/69]																		0.921105
VFG034969(gb|WP_000938103) (nleF) Type III secretion system effector NleF, caspase inhibitor [TTSS secreted effectors (VF1111) - Effector delivery system (VFC0086)] [Escherichia coli O55:H7 str. CB9615]																		1
VFG034973(gb|WP_000938105) (nleF) Type III secretion system effector NleF, caspase inhibitor [TTSS secreted effectors (VF1110) - Effector delivery system (VFC0086)] [Escherichia coli O103:H2 str. 12009]																			1
VFG034981(gb|WP_001145628) (nleG-1) DUF1076 domain-containing protein [TTSS secreted effectors (VF1110) - Effector delivery system (VFC0086)] [Escherichia coli O103:H2 str. 12009]																				1
VFG034989(gb|WP_001131649) (nleG2-2) DUF1076 domain-containing protein [TTSS secreted effectors (VF1110) - Effector delivery system (VFC0086)] [Escherichia coli O103:H2 str. 12009]																		1	1	1
VFG034998 (nleG2-4) unknown protein [TTSS secreted effectors (VF1110) - Effector delivery system (VFC0086)] [Escherichia coli O157:H7 str. Sakai]																		1		1
VFG035000(gb|WP_001131642) (nleG2-4) DUF1076 domain-containing protein [TTSS secreted effectors (VF1111) - Effector delivery system (VFC0086)] [Escherichia coli O55:H7 str. CB9615]																			1
VFG035008(gb|WP_001118000) (nleG-3) DUF1076 domain-containing protein [TTSS secreted effectors (VF1110) - Effector delivery system (VFC0086)] [Escherichia coli O157:H7 str. EC4115]																			1
VFG035010 (nleG-3) T3SS effector NleG family protein [TTSS secreted effectors (VF1110) - Effector delivery system (VFC0086)] [Escherichia coli O103:H2 str. 12009]																		1.02226
VFG035011(gb|WP_001118085) (nleG-3) T3SS effector NleG family protein [TTSS secreted effectors (VF1110) - Effector delivery system (VFC0086)] [Escherichia coli O26:H11 str. 11368]																		1	1	1
VFG035016(gb|WP_001143816) (nleG5-1) DUF1076 domain-containing protein [TTSS secreted effectors (VF1110) - Effector delivery system (VFC0086)] [Escherichia coli O157:H7 str. EC4115]																			1
VFG035029(gb|WP_012816780) (nleG6-1) DUF1076 domain-containing protein [TTSS secreted effectors (VF1110) - Effector delivery system (VFC0086)] [Escherichia coli O103:H2 str. 12009]																		1	1.00157	1
VFG035033(gb|NP_310182) (nleG6-2) T3SS secreted effector NleG [TTSS secreted effectors (VF1110) - Effector delivery system (VFC0086)] [Escherichia coli O157:H7 str. Sakai]																		0.998413
VFG035037(gb|WP_000442132) (nleG6-3) DUF1076 domain-containing protein [TTSS secreted effectors (VF1110) - Effector delivery system (VFC0086)] [Escherichia coli O157:H7 str. EDL933]																		1	1	0.971631
VFG035053(gb|WP_001144077) (nleG8-2) DUF1076 domain-containing protein [TTSS secreted effectors (VF1110) - Effector delivery system (VFC0086)] [Escherichia coli O157:H7 str. EDL933]																			1
VFG035061(gb|WP_001144080) (nleG8-2) T3SS effector NleG family protein [TTSS secreted effectors (VF1110) - Effector delivery system (VFC0086)] [Escherichia coli O26:H11 str. 11368]																		1
VFG035070(gb|WP_000950986) (nleH1) Type III secretion system effector NleH1 [TTSS secreted effectors (VF1110) - Effector delivery system (VFC0086)] [Escherichia coli O103:H2 str. 12009]																				1
VFG035071(gb|WP_000950982) (nleH1) Type III secretion system effector NleH1 [TTSS (VF0191) - Effector delivery system (VFC0086)] [Escherichia coli O111:H- str. 11128]																		1	1
VFG035073(gb|WP_000950979) (nleH2) Type III secretion system effector NleH2 [TTSS secreted effectors (VF1110) - Effector delivery system (VFC0086)] [Escherichia coli O157:H7 str. EDL933]																			1
VFG035076(gb|WP_000950979) (nleH2) Type III secretion system effector NleH2 [TTSS secreted effectors (VF1111) - Effector delivery system (VFC0086)] [Escherichia coli O55:H7 str. CB9615]																		1
VFG035083(gb|WP_001443093) (tssB) type VI secretion system contractile sheath small subunit [SCI-I T6SS (VF1120) - Effector delivery system (VFC0086)] [Escherichia coli CFT073]																										1
VFG035087(gb|WP_001342815) (tssB) type VI secretion system contractile sheath small subunit [SCI-I T6SS (VF1120) - Effector delivery system (VFC0086)] [Escherichia coli O103:H2 str. 12009]								1.00196	1.00196											1
VFG035096(gb|WP_001378340) (tssB) type VI secretion system contractile sheath small subunit [SCI-I T6SS (VF1120) - Effector delivery system (VFC0086)] [Escherichia coli E24377A]		1								1					1
VFG035102(gb|WP_001350147) (tssC) type VI secretion system contractile sheath large subunit [SCI-I T6SS (VF1120) - Effector delivery system (VFC0086)] [Escherichia coli CFT073]																										1
VFG035106(gb|WP_001299107) (tssC) type VI secretion system contractile sheath large subunit [SCI-I T6SS (VF1120) - Effector delivery system (VFC0086)] [Escherichia coli O103:H2 str. 12009]								1	1											1
VFG035115(gb|WP_001297758) (tssC) type VI secretion system contractile sheath large subunit [SCI-I T6SS (VF1120) - Effector delivery system (VFC0086)] [Escherichia coli E24377A]		1								1					1
VFG035121(gb|WP_000686689) (tssK) type VI secretion system baseplate subunit TssK [SCI-I T6SS (VF1120) - Effector delivery system (VFC0086)] [Escherichia coli CFT073]																										1
VFG035125(gb|WP_000690895) (tssK) type VI secretion system baseplate subunit TssK [SCI-I T6SS (VF1120) - Effector delivery system (VFC0086)] [Escherichia coli O103:H2 str. 12009]								1	1											1
VFG035131(gb|WP_000690900) (tssK) type VI secretion system baseplate subunit TssK [SCI-I T6SS (VF1120) - Effector delivery system (VFC0086)] [Escherichia coli E24377A]		1								1					1
VFG035139(gb|WP_000710991) (tssL) type VI secretion system protein TssL, short form [SCI-I T6SS (VF1120) - Effector delivery system (VFC0086)] [Escherichia coli APEC O1]																										1
VFG035141(gb|WP_000712312) (tssL) type VI secretion system protein TssL, short form [SCI-I T6SS (VF1120) - Effector delivery system (VFC0086)] [Escherichia coli O103:H2 str. 12009]																				1
VFG035147(gb|WP_000712319) (tssL) type VI secretion system protein TssL, short form [SCI-I T6SS (VF1120) - Effector delivery system (VFC0086)] [Escherichia coli E24377A]		1						1	1	1					1
VFG035157(gb|WP_001246532) (ECO103_RS17715) OmpA family protein [SCI-I T6SS (VF1120) - Effector delivery system (VFC0086)] [Escherichia coli O103:H2 str. 12009]																				1
VFG035160(gb|WP_001246526) (ECABU_RS15625) OmpA family protein [SCI-I T6SS (VF1120) - Effector delivery system (VFC0086)] [Escherichia coli ABU 83972]																										1
VFG035163(gb|WP_001246539) (ECE24377A_RS17270) OmpA family protein [SCI-I T6SS (VF1120) - Effector delivery system (VFC0086)] [Escherichia coli E24377A]		1						1	1	1					1
VFG035169(gb|WP_000997068) (C_RS16090) Hcp family type VI secretion system effector [SCI-I T6SS (VF1120) - Effector delivery system (VFC0086)] [Escherichia coli CFT073]																										1
VFG035173(gb|WP_000997067) (ECO103_RS17720) Hcp family type VI secretion system effector [SCI-I T6SS (VF1120) - Effector delivery system (VFC0086)] [Escherichia coli O103:H2 str. 12009]		1						1	1	1					1					1						0.957317
VFG035187(gb|WP_000147358) (tssH) type VI secretion system ATPase TssH [SCI-I T6SS (VF1120) - Effector delivery system (VFC0086)] [Escherichia coli APEC O1]																										0.996599
VFG035189(gb|WP_000147348) (tssH) type VI secretion system ATPase TssH [SCI-I T6SS (VF1120) - Effector delivery system (VFC0086)] [Escherichia coli O103:H2 str. 12009]								0.99661	0.99661											0.99661
VFG035195(gb|WP_000147347) (tssH) type VI secretion system ATPase TssH [SCI-I T6SS (VF1120) - Effector delivery system (VFC0086)] [Escherichia coli E24377A]		1								1					1
VFG035205(gb|WP_001024965) (vgrG) type VI secretion system tip protein VgrG [SCI-I T6SS (VF1120) - Effector delivery system (VFC0086)] [Escherichia coli 536]								1	1
VFG035206(gb|WP_000512742) (vgrG) type VI secretion system tip protein VgrG [SCI-I T6SS (VF1120) - Effector delivery system (VFC0086)] [Escherichia coli APEC O1]																										1
VFG035208(gb|WP_000512749) (vgrG) type VI secretion system tip protein VgrG [SCI-I T6SS (VF1120) - Effector delivery system (VFC0086)] [Escherichia coli O103:H2 str. 12009]															1.0012					1
VFG035213 (ECNA114_RS14785*) type IV secretion protein Rhs [SCI-I T6SS (VF1120) - Effector delivery system (VFC0086)] [Escherichia coli NA114]		1						0.993159	0.993159	1										1
VFG035214(gb|WP_000512752) (vgrG) type VI secretion system tip protein VgrG [SCI-I T6SS (VF1120) - Effector delivery system (VFC0086)] [Escherichia coli E24377A]		1								1
VFG035227(gb|WP_001117814) (UTI89_RS15585) PAAR domain-containing protein [SCI-I T6SS (VF1120) - Effector delivery system (VFC0086)] [Escherichia coli UTI89]																										1
VFG035241(gb|WP_001299110) (ECO103_RS17750) type VI secretion protein VasK [SCI-I T6SS (VF1120) - Effector delivery system (VFC0086)] [Escherichia coli O103:H2 str. 12009]		1						1	1	1										1
VFG035249(gb|WP_000557435) (UM146_RS02510) type VI secretion protein VasK [SCI-I T6SS (VF1120) - Effector delivery system (VFC0086)] [Escherichia coli UM146]																										0.999106
VFG035254(gb|WP_001350749) (tssA) type VI secretion system protein TssA [SCI-I T6SS (VF1120) - Effector delivery system (VFC0086)] [Escherichia coli APEC O1]		1.00062							0.911235																	1
VFG035256(gb|WP_001299981) (tssA) type VI secretion system protein TssA [SCI-I T6SS (VF1120) - Effector delivery system (VFC0086)] [Escherichia coli O103:H2 str. 12009]		1						1	1	1										1
VFG035265(gb|WP_015912550) (tssA) type VI secretion system protein TssA [SCI-I T6SS (VF1120) - Effector delivery system (VFC0086)] [Escherichia coli O83:H1 str. LF82]								1
VFG035271(gb|WP_000342485) (tssF) type VI secretion system baseplate subunit TssF [SCI-I T6SS (VF1120) - Effector delivery system (VFC0086)] [Escherichia coli APEC O1]																										1
VFG035272(gb|WP_000342493) (tssF) type VI secretion system baseplate subunit TssF [SCI-I T6SS (VF1120) - Effector delivery system (VFC0086)] [Escherichia coli O103:H2 str. 12009]		1						1	1	1					1					1
VFG035285(gb|WP_000373302) (tssG) type VI secretion system baseplate subunit TssG [SCI-I T6SS (VF1120) - Effector delivery system (VFC0086)] [Escherichia coli O103:H2 str. 12009]		1						1	1	1					1					1
VFG035291(gb|WP_000373308) (tssG) type VI secretion system baseplate subunit TssG [SCI-I T6SS (VF1120) - Effector delivery system (VFC0086)] [Escherichia coli O45:K1:H7 str. S88]																										1
VFG035298(gb|WP_000484008) (tssJ) type VI secretion system lipoprotein TssJ [SCI-I T6SS (VF1120) - Effector delivery system (VFC0086)] [Escherichia coli APEC O1]																										1
VFG035300(gb|WP_000484008) (tssJ) type VI secretion system lipoprotein TssJ [SCI-I T6SS (VF1120) - Effector delivery system (VFC0086)] [Escherichia coli O103:H2 str. 12009]		1						1	1	1					1					1
VFG035306 (tssJ) type VI secretion system lipoprotein TssJ [SCI-I T6SS (VF1120) - Effector delivery system (VFC0086)] [Escherichia coli E24377A]		0.975806						0.962366	1	0.994624										0.927419
VFG035314(gb|WP_000106967) (tssE) type VI secretion system baseplate subunit TssE [SCI-I T6SS (VF1120) - Effector delivery system (VFC0086)] [Escherichia coli APEC O1]																										1
VFG035316(gb|WP_000106970) (tssE) type VI secretion system baseplate subunit TssE [SCI-I T6SS (VF1120) - Effector delivery system (VFC0086)] [Escherichia coli O103:H2 str. 12009]		1						1	1	1					1					1
VFG035349(gb|WP_000157828) (ECE24377A_RS17310) type VI secretion system ImpA family N-terminal domain-containing protein [SCI-I T6SS (VF1120) - Effector delivery system (VFC0086)] [Escherichia coli E24377A]		1						1	1	1					0.980392					1
VFG035350(gb|WP_000157825) (ECOK1_RS16710) type VI secretion system ImpA family N-terminal domain-containing protein [SCI-I T6SS (VF1120) - Effector delivery system (VFC0086)] [Escherichia coli O18:K1:H7 str. IHE3034]																										1
VFG035437(gb|WP_000013181) (aec32) Hcp family type VI secretion system effector [ACE T6SS (VF1122) - Effector delivery system (VFC0086)] [Escherichia coli APEC O1]	1
VFG035439(gb|WP_001284959) (aec32) Hcp family type VI secretion system effector [ACE T6SS (VF1122) - Effector delivery system (VFC0086)] [Escherichia coli O55:H7 str. CB9615]																						1
VFG035443(gb|WP_001284199) (aec32) Hcp family type VI secretion system effector [ACE T6SS (VF1122) - Effector delivery system (VFC0086)] [Escherichia coli O103:H2 str. 12009]																				1			1
VFG035444(gb|WP_001284199) (aec32) Hcp family type VI secretion system effector [ACE T6SS (VF1122) - Effector delivery system (VFC0086)] [Escherichia coli O111:H- str. 11128]		1	1		1	1				1					1
VFG035457(gb|WP_000013181) (aec32) Hcp family type VI secretion system effector [ACE T6SS (VF1122) - Effector delivery system (VFC0086)] [Escherichia coli O83:H1 str. LF82]																										1
VFG035460(gb|NP_308244) (aec31) hypothetical protein [ACE T6SS (VF1122) - Effector delivery system (VFC0086)] [Escherichia coli O157:H7 str. Sakai]																						1.00071
VFG035461(gb|WP_000069182) (aec31) type VI secretion system ImpA and VasL domain-containing protein [ACE T6SS (VF1122) - Effector delivery system (VFC0086)] [Escherichia coli 536]																										1
VFG035469(gb|WP_000377957) (aec31) type VI secretion system ImpA and VasL domain-containing protein [ACE T6SS (VF1122) - Effector delivery system (VFC0086)] [Escherichia coli O103:H2 str. 12009]																				1			0.997044
VFG035470(gb|WP_001087754) (aec31) type VI secretion system ImpA and VasL domain-containing protein [ACE T6SS (VF1122) - Effector delivery system (VFC0086)] [Escherichia coli O111:H- str. 11128]		1								1
VFG035472(gb|WP_001087741) (aec31) type VI secretion system ImpA and VasL domain-containing protein [ACE T6SS (VF1122) - Effector delivery system (VFC0086)] [Escherichia coli O104:H4 str. 2009EL-2050]			1		1	1									1
VFG035476(gb|WP_000073803) (aec31) type VI secretion system ImpA and VasL domain-containing protein [ACE T6SS (VF1122) - Effector delivery system (VFC0086)] [Escherichia coli O44:H18 042]	1
VFG035486(gb|WP_001298186) (aec30) type VI secretion system membrane subunit TssM [ACE T6SS (VF1122) - Effector delivery system (VFC0086)] [Escherichia coli 536]																										1
VFG035489(gb|WP_001303798) (aec30) type VI secretion system membrane subunit TssM [ACE T6SS (VF1122) - Effector delivery system (VFC0086)] [Escherichia coli O55:H7 str. CB9615]																						1
VFG035493(gb|WP_122988827) (aec30) type VI secretion system membrane subunit TssM [ACE T6SS (VF1122) - Effector delivery system (VFC0086)] [Escherichia coli O103:H2 str. 12009]																				1
VFG035494(gb|WP_063103658) (aec30) type VI secretion system membrane subunit TssM [ACE T6SS (VF1122) - Effector delivery system (VFC0086)] [Escherichia coli O26:H11 str. 11368]		0.999418								0.999418
VFG035499(gb|WP_122986661) (aec30) type VI secretion system membrane subunit TssM [ACE T6SS (VF1122) - Effector delivery system (VFC0086)] [Escherichia coli O44:H18 042]	1
VFG035501(gb|WP_122986593) (aec30) type VI secretion system membrane subunit TssM [ACE T6SS (VF1122) - Effector delivery system (VFC0086)] [Escherichia coli E24377A]															1
VFG035502 (aec30) type VI secretion system membrane subunit TssM [ACE T6SS (VF1122) - Effector delivery system (VFC0086)] [Escherichia coli UMNK88]					1.00029	1.00117
VFG035510(gb|WP_001298176) (aec29) type VI secretion system protein TssA [ACE T6SS (VF1122) - Effector delivery system (VFC0086)] [Escherichia coli 536]																										1
VFG035513(gb|WP_001240517) (aec29) type VI secretion system protein TssA [ACE T6SS (VF1122) - Effector delivery system (VFC0086)] [Escherichia coli O55:H7 str. CB9615]																						1
VFG035517(gb|WP_001240530) (aec29) type VI secretion system protein TssA [ACE T6SS (VF1122) - Effector delivery system (VFC0086)] [Escherichia coli O103:H2 str. 12009]		1								1										1		1.00354
VFG035523(gb|WP_001306815) (aec29) type VI secretion system protein TssA [ACE T6SS (VF1122) - Effector delivery system (VFC0086)] [Escherichia coli O44:H18 042]	1
VFG035525(gb|WP_001240530) (aec29) type VI secretion system protein TssA [ACE T6SS (VF1122) - Effector delivery system (VFC0086)] [Escherichia coli E24377A]															1
VFG035526(gb|WP_001240525) (aec29) type VI secretion system protein TssA [ACE T6SS (VF1122) - Effector delivery system (VFC0086)] [Escherichia coli UMNK88]					1	1
VFG035532(gb|WP_000088854) (aec28) type VI secretion system-associated protein TagO [EHS (VF1176) - Effector delivery system (VFC0086)] [Escherichia coli O157:H7 str. EDL933]	0.991935																					1
VFG035542(gb|WP_000088859) (aec28) type VI secretion system-associated protein TagO [ACE T6SS (VF1122) - Effector delivery system (VFC0086)] [Escherichia coli O103:H2 str. 12009]																				0.985215
VFG035545(gb|WP_000088873) (aec28) type VI secretion system-associated protein TagO [ACE T6SS (VF1122) - Effector delivery system (VFC0086)] [Escherichia coli O104:H4 str. 2009EL-2050]	1	1								1
VFG035551(gb|WP_000088862) (aec28) type VI secretion system-associated protein TagO [ACE T6SS (VF1122) - Effector delivery system (VFC0086)] [Escherichia coli E24377A]															1
VFG035552(gb|WP_000088852) (aec28) type VI secretion system-associated protein TagO [ACE T6SS (VF1122) - Effector delivery system (VFC0086)] [Escherichia coli UMNK88]					1	1																			1
VFG035556(gb|WP_000088600) (aec28) type VI secretion system-associated protein TagO [ACE T6SS (VF1122) - Effector delivery system (VFC0086)] [Escherichia coli O83:H1 str. LF82]																										1
VFG035568(gb|WP_000614417) (aec27/clpV) type VI secretion system ATPase TssH [ACE T6SS (VF1122) - Effector delivery system (VFC0086)] [Escherichia coli O103:H2 str. 12009]																				1
VFG035571(gb|WP_000614396) (aec27/clpV) type VI secretion system ATPase TssH [ACE T6SS (VF1122) - Effector delivery system (VFC0086)] [Escherichia coli O104:H4 str. 2009EL-2050]		1.00652								1.00652
VFG035577(gb|WP_000614397) (aec27/clpV) type VI secretion system ATPase TssH [ACE T6SS (VF1122) - Effector delivery system (VFC0086)] [Escherichia coli E24377A]															1
VFG035578(gb|WP_000614329) (aec27/clpV) type VI secretion system ATPase TssH [ACE T6SS (VF1122) - Effector delivery system (VFC0086)] [Escherichia coli UMNK88]			1		1	1																0.990239			1
VFG035582(gb|WP_000614307) (aec27/clpV) type VI secretion system ATPase TssH [ACE T6SS (VF1122) - Effector delivery system (VFC0086)] [Escherichia coli O83:H1 str. LF82]	0.989142																									1
VFG035586(gb|WP_001282177) (aec26) type IVB secretion system protein IcmH/DotU [ACE T6SS (VF1122) - Effector delivery system (VFC0086)] [Escherichia coli 536]																										1
VFG035589(gb|WP_000343294) (aec26) type IVB secretion system protein IcmH/DotU [ACE T6SS (VF1122) - Effector delivery system (VFC0086)] [Escherichia coli O55:H7 str. CB9615]																						1
VFG035594(gb|WP_000343304) (aec26) type IVB secretion system protein IcmH/DotU [ACE T6SS (VF1122) - Effector delivery system (VFC0086)] [Escherichia coli O103:H2 str. 12009]																				1
VFG035596(gb|WP_000343298) (aec26) type IVB secretion system protein IcmH/DotU [ACE T6SS (VF1122) - Effector delivery system (VFC0086)] [Escherichia coli O26:H11 str. 11368]		1								1
VFG035601(gb|WP_001280269) (aec26) type IVB secretion system protein IcmH/DotU [ACE T6SS (VF1122) - Effector delivery system (VFC0086)] [Escherichia coli O44:H18 042]	1
VFG035603(gb|WP_000343302) (aec26) type IVB secretion system protein IcmH/DotU [ACE T6SS (VF1122) - Effector delivery system (VFC0086)] [Escherichia coli E24377A]															1
VFG035604(gb|WP_000343289) (aec26) type IVB secretion system protein IcmH/DotU [ACE T6SS (VF1122) - Effector delivery system (VFC0086)] [Escherichia coli UMNK88]			1		1	1																			1
VFG035613(gb|WP_000224516) (aec25) type VI secretion system baseplate subunit TssK [ACE T6SS (VF1122) - Effector delivery system (VFC0086)] [Escherichia coli APEC O1]	1
VFG035615(gb|WP_000246448) (aec25) type VI secretion system baseplate subunit TssK [ACE T6SS (VF1122) - Effector delivery system (VFC0086)] [Escherichia coli O55:H7 str. CB9615]																						1
VFG035620(gb|WP_000246413) (aec25) type VI secretion system baseplate subunit TssK [ACE T6SS (VF1122) - Effector delivery system (VFC0086)] [Escherichia coli O103:H2 str. 12009]		1								1										1
VFG035622(gb|WP_000246421) (aec25) type VI secretion system baseplate subunit TssK [ACE T6SS (VF1122) - Effector delivery system (VFC0086)] [Escherichia coli O104:H4 str. 2009EL-2050]															1
VFG035629(gb|WP_000246443) (aec25) type VI secretion system baseplate subunit TssK [ACE T6SS (VF1122) - Effector delivery system (VFC0086)] [Escherichia coli UMNK88]			1		1	1																			1
VFG035633(gb|WP_000224517) (aec25) type VI secretion system baseplate subunit TssK [ACE T6SS (VF1122) - Effector delivery system (VFC0086)] [Escherichia coli O83:H1 str. LF82]																										1
VFG035635(gb|WP_001080153) (aec24) type VI secretion system lipoprotein TssJ [EHS (VF1176) - Effector delivery system (VFC0086)] [Escherichia coli O157:H7 str. EDL933]																						1
VFG035638(gb|WP_001013423) (aec24) type VI secretion system lipoprotein TssJ [ACE T6SS (VF1122) - Effector delivery system (VFC0086)] [Escherichia coli APEC O1]	1
VFG035645(gb|WP_001080149) (aec24) type VI secretion system lipoprotein TssJ [ACE T6SS (VF1122) - Effector delivery system (VFC0086)] [Escherichia coli O103:H2 str. 12009]		1								1										1
VFG035652(gb|WP_001013424) (aec24) type VI secretion system lipoprotein TssJ [ACE T6SS (VF1122) - Effector delivery system (VFC0086)] [Escherichia coli O44:H18 042]	0.980952
VFG035654(gb|WP_001080158) (aec24) type VI secretion system lipoprotein TssJ [ACE T6SS (VF1122) - Effector delivery system (VFC0086)] [Escherichia coli E24377A]															1
VFG035655(gb|WP_001080149) (aec24) type VI secretion system lipoprotein TssJ [ACE T6SS (VF1122) - Effector delivery system (VFC0086)] [Escherichia coli UMNK88]			0.937143		1	1																			1
VFG035659(gb|WP_001013423) (aec24) type VI secretion system lipoprotein TssJ [ACE T6SS (VF1122) - Effector delivery system (VFC0086)] [Escherichia coli O83:H1 str. LF82]																										1
VFG035661(gb|WP_001113707) (aec23) type VI secretion system-associated FHA domain protein TagH [EHS (VF1176) - Effector delivery system (VFC0086)] [Escherichia coli O157:H7 str. EDL933]																						1
VFG035664(gb|WP_000433564) (aec23) type VI secretion system-associated FHA domain protein TagH [ACE T6SS (VF1122) - Effector delivery system (VFC0086)] [Escherichia coli APEC O1]	1
VFG035671(gb|WP_001113725) (aec23) type VI secretion system-associated FHA domain protein TagH [ACE T6SS (VF1122) - Effector delivery system (VFC0086)] [Escherichia coli O103:H2 str. 12009]		1								1										1
VFG035679(gb|WP_001113701) (aec23) type VI secretion system-associated FHA domain protein TagH [ACE T6SS (VF1122) - Effector delivery system (VFC0086)] [Escherichia coli E24377A]															1
VFG035680(gb|WP_001113713) (aec23) type VI secretion system-associated FHA domain protein TagH [ACE T6SS (VF1122) - Effector delivery system (VFC0086)] [Escherichia coli UMNK88]					1	1																			1
VFG035684(gb|WP_000433567) (aec23) type VI secretion system-associated FHA domain protein TagH [ACE T6SS (VF1122) - Effector delivery system (VFC0086)] [Escherichia coli O83:H1 str. LF82]																										1
VFG035689(gb|WP_000896714) (aec22) type VI secretion system baseplate subunit TssG [ACE T6SS (VF1122) - Effector delivery system (VFC0086)] [Escherichia coli APEC O1]																										1
VFG035696(gb|WP_000348793) (aec22) type VI secretion system baseplate subunit TssG [ACE T6SS (VF1122) - Effector delivery system (VFC0086)] [Escherichia coli O103:H2 str. 12009]																				1
VFG035697(gb|WP_000348793) (aec22) type VI secretion system baseplate subunit TssG [ACE T6SS (VF1122) - Effector delivery system (VFC0086)] [Escherichia coli O104:H4 str. 2009EL-2050]		1
VFG035701(gb|WP_000896719) (aec22) type VI secretion system baseplate subunit TssG [ACE T6SS (VF1122) - Effector delivery system (VFC0086)] [Escherichia coli O44:H18 042]	0.999048
VFG035703(gb|WP_000348806) (aec22) type VI secretion system baseplate subunit TssG [ACE T6SS (VF1122) - Effector delivery system (VFC0086)] [Escherichia coli E24377A]															1
VFG035712(gb|WP_000863399) (tssF) type VI secretion system baseplate subunit TssF [ACE T6SS (VF1122) - Effector delivery system (VFC0086)] [Escherichia coli 536]																										1
VFG035715(gb|WP_000393844) (tssF) type VI secretion system baseplate subunit TssF [ACE T6SS (VF1122) - Effector delivery system (VFC0086)] [Escherichia coli O55:H7 str. CB9615]																						1
VFG035720(gb|WP_000393844) (tssF) type VI secretion system baseplate subunit TssF [ACE T6SS (VF1122) - Effector delivery system (VFC0086)] [Escherichia coli O103:H2 str. 12009]																				1
VFG035726(gb|WP_000863395) (tssF) type VI secretion system baseplate subunit TssF [ACE T6SS (VF1122) - Effector delivery system (VFC0086)] [Escherichia coli O44:H18 042]	1
VFG035728(gb|WP_000393845) (tssF) type VI secretion system baseplate subunit TssF [ACE T6SS (VF1122) - Effector delivery system (VFC0086)] [Escherichia coli E24377A]		1								1					1								0.986494
VFG035729(gb|WP_000393852) (tssF) type VI secretion system baseplate subunit TssF [ACE T6SS (VF1122) - Effector delivery system (VFC0086)] [Escherichia coli UMNK88]					1	1
VFG035738(gb|WP_000946068) (aec19) type VI secretion system baseplate subunit TssE [ACE T6SS (VF1122) - Effector delivery system (VFC0086)] [Escherichia coli APEC O1]																										1
VFG035745(gb|WP_000611742) (aec19) type VI secretion system baseplate subunit TssE [ACE T6SS (VF1122) - Effector delivery system (VFC0086)] [Escherichia coli O103:H2 str. 12009]		1			1	1				1					1					1		1	1
VFG035751(gb|WP_001189669) (aec19) type VI secretion system baseplate subunit TssE [ACE T6SS (VF1122) - Effector delivery system (VFC0086)] [Escherichia coli O44:H18 042]	1
VFG035760(gb|WP_000056994) (aec18) type VI secretion system contractile sheath large subunit [EHS (VF1176) - Effector delivery system (VFC0086)] [Escherichia coli O157:H7 str. EDL933]		1				1				1					1								1		1
VFG035762(gb|WP_000111582) (aec18) type VI secretion system contractile sheath large subunit [ACE T6SS (VF1122) - Effector delivery system (VFC0086)] [Escherichia coli 536]																										1
VFG035768(gb|WP_000056973) (aec18) type VI secretion system contractile sheath large subunit [ACE T6SS (VF1122) - Effector delivery system (VFC0086)] [Escherichia coli O103:H2 str. 12009]																				1
VFG035770(gb|WP_000056978) (aec18) type VI secretion system contractile sheath large subunit [ACE T6SS (VF1122) - Effector delivery system (VFC0086)] [Escherichia coli O104:H4 str. 2009EL-2050]																						1
VFG035774(gb|WP_000111580) (aec18) type VI secretion system contractile sheath large subunit [ACE T6SS (VF1122) - Effector delivery system (VFC0086)] [Escherichia coli O44:H18 042]	1
VFG035777(gb|WP_000056989) (aec18) type VI secretion system contractile sheath large subunit [ACE T6SS (VF1122) - Effector delivery system (VFC0086)] [Escherichia coli UMNK88]					1
VFG035785(gb|WP_000041480) (aec17) type VI secretion system contractile sheath small subunit [ACE T6SS (VF1122) - Effector delivery system (VFC0086)] [Escherichia coli 536]																										1
VFG035793(gb|WP_000037389) (aec17) type VI secretion system contractile sheath small subunit [ACE T6SS (VF1122) - Effector delivery system (VFC0086)] [Escherichia coli O103:H2 str. 12009]																				1
VFG035799(gb|WP_000041478) (aec17) type VI secretion system contractile sheath small subunit [ACE T6SS (VF1122) - Effector delivery system (VFC0086)] [Escherichia coli O44:H18 042]	1
VFG035801(gb|WP_000037389) (aec17) type VI secretion system contractile sheath small subunit [ACE T6SS (VF1122) - Effector delivery system (VFC0086)] [Escherichia coli E24377A]		1								1					1
VFG035802(gb|WP_000037397) (aec17) type VI secretion system contractile sheath small subunit [ACE T6SS (VF1122) - Effector delivery system (VFC0086)] [Escherichia coli UMNK88]					1	1																1	1		1
VFG035808(gb|WP_001142958) (aec16) Hcp family type VI secretion system effector [EHS (VF1176) - Effector delivery system (VFC0086)] [Escherichia coli O157:H7 str. EDL933]					1	1														1		1	1
VFG035810(gb|WP_001142963) (aec16) Hcp family type VI secretion system effector [ACE T6SS (VF1122) - Effector delivery system (VFC0086)] [Escherichia coli 536]																										1
VFG035824(gb|WP_001142963) (aec16) Hcp family type VI secretion system effector [ACE T6SS (VF1122) - Effector delivery system (VFC0086)] [Escherichia coli O44:H18 042]	1
VFG035826(gb|WP_001142958) (aec16) Hcp family type VI secretion system effector [ACE T6SS (VF1122) - Effector delivery system (VFC0086)] [Escherichia coli E24377A]		1								1					1
VFG035835(gb|WP_000053624) (aec15) type VI secretion system tip protein VgrG [ACE T6SS (VF1122) - Effector delivery system (VFC0086)] [Escherichia coli 536]	1.01513																									0.962683
VFG035838(gb|WP_000103278) (aec15) type VI secretion system tip protein VgrG [ACE T6SS (VF1122) - Effector delivery system (VFC0086)] [Escherichia coli O55:H7 str. CB9615]			1.00047																			1
VFG035843(gb|WP_000103436) (aec15) type VI secretion system tip protein VgrG [ACE T6SS (VF1122) - Effector delivery system (VFC0086)] [Escherichia coli O103:H2 str. 12009]													0.979137							1.01707
VFG035845(gb|WP_000103194) (aec15) type VI secretion system tip protein VgrG [ACE T6SS (VF1122) - Effector delivery system (VFC0086)] [Escherichia coli O26:H11 str. 11368]		1.01091	0.989094	0.989094	0.989094	0.992413	1.01233					1.02466	0.989094	0.990517		1	1				1			1.00569	1
VFG035846(gb|WP_000103201) (aec15) type VI secretion system tip protein VgrG [ACE T6SS (VF1122) - Effector delivery system (VFC0086)] [Escherichia coli O104:H4 str. 2009EL-2050]																							0.961119
VFG035849(gb|WP_000103186) (aec15) type VI secretion system tip protein VgrG [ACE T6SS (VF1122) - Effector delivery system (VFC0086)] [Escherichia coli E24377A]										1.00474					1.00474
VFG035850(gb|WP_000103397) (aec15) type VI secretion system tip protein VgrG [ACE T6SS (VF1122) - Effector delivery system (VFC0086)] [Escherichia coli UMNK88]					1	1
VFG035855(gb|WP_000053628) (aec15) type VI secretion system tip protein VgrG [ACE T6SS (VF1122) - Effector delivery system (VFC0086)] [Escherichia coli O83:H1 str. NRG 857C]																										0.997983
VFG035856(gb|WP_000571853) (aec14) DUF2169 domain-containing protein [ACE T6SS (VF1122) - Effector delivery system (VFC0086)] [Escherichia coli 536]	1
VFG035866(gb|WP_000528852) (UTI89_RS01245) DUF4150 domain-containing protein [ACE T6SS (VF1122) - Effector delivery system (VFC0086)] [Escherichia coli UTI89]	1
VFG035872(gb|WP_000513317) (aec11) hypothetical protein [ACE T6SS (VF1122) - Effector delivery system (VFC0086)] [Escherichia coli 536]	1
VFG035879(gb|WP_000227712) (aec8) hypothetical protein [ACE T6SS (VF1122) - Effector delivery system (VFC0086)] [Escherichia coli 536]	1																									1
VFG035888(gb|WP_001298174) (aec7) integrating conjugative element protein [ACE T6SS (VF1122) - Effector delivery system (VFC0086)] [Escherichia coli 536]																										1
VFG035891(gb|WP_001306803) (aec7) integrating conjugative element protein [ACE T6SS (VF1122) - Effector delivery system (VFC0086)] [Escherichia coli O44:H18 042]	0.997955
VFG036031(gb|WP_000554183) (cdiA) contact-dependent inhibition effector tRNA nuclease [Contact-dependent inhibition CDI system (VF1131) - Effector delivery system (VFC0086)] [Escherichia coli CFT073]																										0.99886
VFG036037(gb|WP_001164766) (cdiB) ShlB/FhaC/HecB family hemolysin secretion/activation protein [Contact-dependent inhibition CDI system (VF1131) - Effector delivery system (VFC0086)] [Escherichia coli 536]																										1
VFG036039(gb|WP_001305333) (cdiB) ShlB/FhaC/HecB family hemolysin secretion/activation protein [Contact-dependent inhibition CDI system (VF1131) - Effector delivery system (VFC0086)] [Escherichia coli ABU 83972]																		1.04963	1.05302
VFG040946(gb|WP_000942795) (yghD) GspM family type II secretion system protein YghD [Gsp (VF1177) - Effector delivery system (VFC0086)] [Escherichia coli E24377A]		1		1		0.953445		1	1	1			1	1.00931	1					1
VFG040947(gb|WP_000094974) (gspL) type II secretion system protein GspL [Gsp (VF1177) - Effector delivery system (VFC0086)] [Escherichia coli E24377A]		1	1	1	1	1		1	1	1	1		1	1	1	1				1	1				1	1
VFG040948(gb|WP_000633187) (gspK) type II secretion system minor pseudopilin GspK [Gsp (VF1177) - Effector delivery system (VFC0086)] [Escherichia coli E24377A]					1	1		1	1					0.98364						0.976483
VFG040949(gb|WP_001255040) (gspJ) type II secretion system minor pseudopilin GspJ [Gsp (VF1177) - Effector delivery system (VFC0086)] [Escherichia coli E24377A]		1	1	1	1	1	1	1	1	1	1	1	1	1	1		1		1	1	1				1	1
VFG040950(gb|WP_000820125) (gspI) type II secretion system minor pseudopilin GspI [Gsp (VF1177) - Effector delivery system (VFC0086)] [Escherichia coli E24377A]			1	1	1	1	1	1	1		1	1	1	1	1.02419	1	1	1	1	1	1.00538	1.02957	0.991935	1		1
VFG040951(gb|WP_001115154) (gspH) type II secretion system minor pseudopilin GspH [Gsp (VF1177) - Effector delivery system (VFC0086)] [Escherichia coli E24377A]		1	1	1	1	1	1	1	1	1		1	1.00177	1.00177		1	1			1	1.00887		0.95922	1
VFG040952(gb|WP_001087295) (gspG) type II secretion system major pseudopilin GspG [Gsp (VF1177) - Effector delivery system (VFC0086)] [Escherichia coli E24377A]	1	1						1	1	1	1		1.01316		1	1	1		1	1	1	1		1		1
VFG040953(gb|WP_001173448) (gspF) type II secretion system inner membrane protein GspF [Gsp (VF1177) - Effector delivery system (VFC0086)] [Escherichia coli E24377A]		1	1	1	1	1		1	1	1	1		1	1	1	1	1	1		1	1			1
VFG040954(gb|WP_000249322) (gspE) type II secretion system ATPase GspE [Gsp (VF1177) - Effector delivery system (VFC0086)] [Escherichia coli E24377A]		1	1	1	1	1		1	1	1			1	1		1	1	1		0.995984	1			1
VFG040955(gb|WP_000498824) (gspD) type II secretion system secretin GspD [Gsp (VF1177) - Effector delivery system (VFC0086)] [Escherichia coli E24377A]			1	1	1	1	1	1	1		1	1	1	1		1	1	1			1			1	1	1
VFG040956(gb|WP_000135067) (gspC) type II secretion system protein GspC [Gsp (VF1177) - Effector delivery system (VFC0086)] [Escherichia coli E24377A]	1	1.00208	1	1.00313	1		1	1	1			1	0.997917	0.982292	1.00625	1	1	1						0.996875		1
VFG041049(gb|WP_000123970) (Z_RS01215) hypothetical protein [EHS (VF1176) - Effector delivery system (VFC0086)] [Escherichia coli O157:H7 str. EDL933]		1			1	1				1					1					1		1	1		1
VFG041051(gb|WP_000103125) (Z_RS01240) type VI secretion system tip protein VgrG [EHS (VF1176) - Effector delivery system (VFC0086)] [Escherichia coli O157:H7 str. EDL933]		1	1							1					1					1		0.973856
VFG041091(gb|NP_459264) (STM0267) sciB domain protein [SCI (Salmonella centrisome island)/SPI-6 T6SS (VF0974) - Effector delivery system (VFC0086)] [Salmonella enterica subsp. enterica serovar Typhimurium str. LT2]								1	1									1	1
VFG041092(gb|NP_459265) (STM0268) type VI secretion protein [SCI (Salmonella centrisome island)/SPI-6 T6SS (VF0974) - Effector delivery system (VFC0086)] [Salmonella enterica subsp. enterica serovar Typhimurium str. LT2]								1	1									1	1
VFG041093(gb|NP_459266) (STM0269) hypothetical protein [SCI (Salmonella centrisome island)/SPI-6 T6SS (VF0974) - Effector delivery system (VFC0086)] [Salmonella enterica subsp. enterica serovar Typhimurium str. LT2]																		1.00606
VFG041094(gb|NP_459267) (STM0270) impE family protein [SCI (Salmonella centrisome island)/SPI-6 T6SS (VF0974) - Effector delivery system (VFC0086)] [Salmonella enterica subsp. enterica serovar Typhimurium str. LT2]								1.01091	1.00727
VFG041096(gb|NP_459269) (STM0272) ClpV1 family T6SS ATPase [SCI (Salmonella centrisome island)/SPI-6 T6SS (VF0974) - Effector delivery system (VFC0086)] [Salmonella enterica subsp. enterica serovar Typhimurium str. LT2]								0.998864	0.998864									0.996591
VFG041097(gb|NP_459270) (STM0273) type VI secretion system-associated protein [SCI (Salmonella centrisome island)/SPI-6 T6SS (VF0974) - Effector delivery system (VFC0086)] [Salmonella enterica subsp. enterica serovar Typhimurium str. LT2]								1.00552	1.00552									1.00552
VFG041098(gb|NP_459271) (STM0274) EvpB family type VI secretion protein [SCI (Salmonella centrisome island)/SPI-6 T6SS (VF0974) - Effector delivery system (VFC0086)] [Salmonella enterica subsp. enterica serovar Typhimurium str. LT2]								1.00398	1.00398									1.00398
VFG041103(gb|NP_459277) (STM0279) Hcp1 family type VI secretion system effector [SCI (Salmonella centrisome island)/SPI-6 T6SS (VF0974) - Effector delivery system (VFC0086)] [Salmonella enterica subsp. enterica serovar Typhimurium str. LT2]								1	1									1
VFG041104(gb|NP_459278) (tssJ) type VI secretion system-associated lipoprotein [SCI (Salmonella centrisome island)/SPI-6 T6SS (VF0974) - Effector delivery system (VFC0086)] [Salmonella enterica subsp. enterica serovar Typhimurium str. LT2]								0.998138	0.994413									0.994413
VFG041105(gb|NP_459279) (tssK) type VI secretion system-associated protein [SCI (Salmonella centrisome island)/SPI-6 T6SS (VF0974) - Effector delivery system (VFC0086)] [Salmonella enterica subsp. enterica serovar Typhimurium str. LT2]								1.00074										1
VFG041106(gb|NP_459280) (STM0282) hypothetical protein [SCI (Salmonella centrisome island)/SPI-6 T6SS (VF0974) - Effector delivery system (VFC0086)] [Salmonella enterica subsp. enterica serovar Typhimurium str. LT2]								1.0092	1.0092									1.0092
VFG041109(gb|NP_459283) (STM0285) hypothetical protein [SCI (Salmonella centrisome island)/SPI-6 T6SS (VF0974) - Effector delivery system (VFC0086)] [Salmonella enterica subsp. enterica serovar Typhimurium str. LT2]								0.999225	0.999225									0.974419
VFG041110(gb|NP_459284) (STM0286) hypothetical protein [SCI (Salmonella centrisome island)/SPI-6 T6SS (VF0974) - Effector delivery system (VFC0086)] [Salmonella enterica subsp. enterica serovar Typhimurium str. LT2]								1	0.998733									0.998733
VFG041113(gb|NP_459287) (vgrG) type VI secretion protein Vgr [SCI (Salmonella centrisome island)/SPI-6 T6SS (VF0974) - Effector delivery system (VFC0086)] [Salmonella enterica subsp. enterica serovar Typhimurium str. LT2]								1.00868	1.00868									1.01598
VFG041520(gb|WP_012908650) (ROD_RS23610) DUF4765 family protein [T3SS (VF1262) - Effector delivery system (VFC0086)] [Citrobacter rodentium ICC168]																				1.00089
VFG041571(gb|WP_012905236) (ROD_RS04625) phage tail assembly protein [T3SS (VF1262) - Effector delivery system (VFC0086)] [Citrobacter rodentium ICC168]			0.988304					0.991228	0.98538
VFG041704 (E2348C_RS07690*) secretion protein EspO [TTSS secreted effectors (VF1111) - Effector delivery system (VFC0086)] [Escherichia coli O127:H6 str. E2348/69]																		1
VFG041707 (E2348C_RS28260*) T3SS effector protein NleH [TTSS secreted effectors (VF1111) - Effector delivery system (VFC0086)] [Escherichia coli O127:H6 str. E2348/69]																		1	1.00606	1
VFG042073(gb|NP_311761) (eivF) type III secretion protein EivF [ETT2 (VF1161) - Effector delivery system (VFC0086)] [Escherichia coli O157:H7 str. Sakai]	1										1								1			1
VFG042074(gb|NP_311762) (ECs_3735) hypothetical protein [ETT2 (VF1161) - Effector delivery system (VFC0086)] [Escherichia coli O157:H7 str. Sakai]	1		1								1								1			1
VFG042076(gb|NP_311760) (eivG) type III secretion protein EivG [ETT2 (VF1161) - Effector delivery system (VFC0086)] [Escherichia coli O157:H7 str. Sakai]	1										1								0.999413			1
VFG042077(gb|NP_311759) (eivE) type III secretion protein EivE [ETT2 (VF1161) - Effector delivery system (VFC0086)] [Escherichia coli O157:H7 str. Sakai]	1										1								1			1
VFG042078(gb|NP_311758) (eivA) type III secretion protein EivA [ETT2 (VF1161) - Effector delivery system (VFC0086)] [Escherichia coli O157:H7 str. Sakai]	1										1								1			1
VFG042079(gb|NP_311755) (eivJ1) type III secretion system protein EivJ1 [ETT2 (VF1161) - Effector delivery system (VFC0086)] [Escherichia coli O157:H7 str. Sakai]	1										1								1			1
VFG042080(gb|NP_311756) (eivI) type III secretion apparatus protein EivI [ETT2 (VF1161) - Effector delivery system (VFC0086)] [Escherichia coli O157:H7 str. Sakai]	1										1								1			1
VFG042081(gb|NP_311757) (eivC) type III secretion apparatus protein EivC [ETT2 (VF1161) - Effector delivery system (VFC0086)] [Escherichia coli O157:H7 str. Sakai]	1										0.985305								1			1
VFG042082(gb|NP_311754) (eivJ2) type III secretion protein [ETT2 (VF1161) - Effector delivery system (VFC0086)] [Escherichia coli O157:H7 str. Sakai]	1										1								1			1
VFG042083(gb|NP_311753) (epaO) type III secretion protein EpaO [ETT2 (VF1161) - Effector delivery system (VFC0086)] [Escherichia coli O157:H7 str. Sakai]	1.00101				1.00304	1.00304	1.00101	1.00101	1.00101		1.00101	1.00101						1.00101	1.00101	1.00101		1.00101	1.00101
VFG042084(gb|NP_311752) (escR) T3SS structure protein EscR [ETT2 (VF1161) - Effector delivery system (VFC0086)] [Escherichia coli O157:H7 str. Sakai]	1				1	1	1	1	1		1	1						1	1	1		1	1		1
VFG042085(gb|NP_311751) (epaQ) type III secretion protein EpaQ [ETT2 (VF1161) - Effector delivery system (VFC0086)] [Escherichia coli O157:H7 str. Sakai]	1				1	1		1	1		1							1	1	1		1	0.996169		1
VFG042086(gb|NP_311748) (eprS) T3SS component EprS [ETT2 (VF1161) - Effector delivery system (VFC0086)] [Escherichia coli O157:H7 str. Sakai]	1				0.997326	0.998217		0.999109	0.999109		1							1.0107	1	0.999109		1	0.999109		0.999109
VFG042087(gb|NP_311746) (ECs_3719) type III secretion protein EprH [ETT2 (VF1161) - Effector delivery system (VFC0086)] [Escherichia coli O157:H7 str. Sakai]	0.998639		1		1	1	1	1	1		0.964626	1						0.998639	1	1		1	1
VFG042088(gb|NP_311747) (etrA) transcriptional regulator [ETT2 (VF1161) - Effector delivery system (VFC0086)] [Escherichia coli O157:H7 str. Sakai]	1				1	1		1	1		1							1	1	1		1	1
VFG042089(gb|NP_311744) (eprJ) type III secretion protein EprJ [ETT2 (VF1161) - Effector delivery system (VFC0086)] [Escherichia coli O157:H7 str. Sakai]	1		0.993994		1	1	1	0.996997	0.996997		1	1						0.996997	1	0.996997		1	0.996997
VFG042090(gb|NP_311745) (ECs_3718) type III secretion protein EprI [ETT2 (VF1161) - Effector delivery system (VFC0086)] [Escherichia coli O157:H7 str. Sakai]	1		1.00417		1	1	1	1.00417	1.00417		1	1						1.00417	1	1.00417		1	1.00417
VFG042091(gb|NP_311742) (ECs_3715) type III secretion apparatus protein OrgA/MxiK [ETT2 (VF1161) - Effector delivery system (VFC0086)] [Escherichia coli O157:H7 str. Sakai]	1		1		1	1	1	1	1		0.998282	1						0.998282	1	0.998282		1	1
VFG042092(gb|NP_311743) (eprK) type III secretion system lipoprotein precursor EprK [ETT2 (VF1161) - Effector delivery system (VFC0086)] [Escherichia coli O157:H7 str. Sakai]	1		1		1	1	1	1	1		1	1						1	1	1		1	1
VFG042093(gb|NP_311740) (ygeM) hypothetical protein [ETT2 (VF1161) - Effector delivery system (VFC0086)] [Escherichia coli O157:H7 str. Sakai]	1		1		1	1	1	1	1		1	1						1	1	1		1	1
VFG042094 (pbl) unknown protein [ETT2 (VF1161) - Effector delivery system (VFC0086)] [Escherichia coli O157:H7 str. Sakai]	1		0.997512		0.997512	0.997512	0.997512	0.997512	0.997512		1	0.997512						0.997512	1	0.997512		1	0.997512
VFG042095(gb|NP_311739) (ECs_3712) transcriptional regulator [ETT2 (VF1161) - Effector delivery system (VFC0086)] [Escherichia coli O157:H7 str. Sakai]	1		1.00632		1	1	1	1	1		1	1						1	1	1		1	1
VFG042096(gb|NP_311735) (ygeG) SycD-like chaperone family TPR-repeat-containing protein [ETT2 (VF1161) - Effector delivery system (VFC0086)] [Escherichia coli O157:H7 str. Sakai]	1		1		1	1	1	1	1		1	1						1	1	1		1	1		1
VFG042097(gb|NP_311736) (ygeH) transcriptional regulator [ETT2 (VF1161) - Effector delivery system (VFC0086)] [Escherichia coli O157:H7 str. Sakai]	1		1		1	1	1	1	1		1	1						1	1	1		1	1
VFG042210(gb|NP_306456) (epaR1) type III secretion protein EpaR [ETT2 (VF1161) - Effector delivery system (VFC0086)] [Escherichia coli O157:H7 str. Sakai]	1				1	1		1	1		1							1	1	1		1	1		1
VFG042218(gb|AAN07916) (cif) Type III secretion system effector Cif, cyclomodulin [TTSS secreted effectors (VF1110) - Effector delivery system (VFC0086)] [Escherichia coli O26 str. C/15333]																		1	1	1
VFG042364(gb|CAA11507) (hbp) haemoglobin protease [Hbp (hemoglobin-binding protease) (VF1167) - Effector delivery system (VFC0086)] [Escherichia coli O8:K43 EB1]																1.00677	1.00798				1.01524		1	1.0075	1.01064
VFG045808(gb|WP_021543768) (vgrG) type VI secretion system tip protein VgrG [SCI-I T6SS (VF1120) - Effector delivery system (VFC0086)] [Escherichia coli O25b:H4-ST131]								0.997478	0.997478						1.00084
VFG046091(gb|WP_000348793) (aec22) type VI secretion system baseplate subunit TssG [ACE T6SS (VF1122) - Effector delivery system (VFC0086)] [Escherichia coli VR50]					1	1				1															1
VFG046092(gb|WP_000393852) (tssF) type VI secretion system baseplate subunit TssF [ACE T6SS (VF1122) - Effector delivery system (VFC0086)] [Escherichia coli VR50]																									1
VFG046093(gb|WP_000611744) (aec19) type VI secretion system baseplate subunit TssE [ACE T6SS (VF1122) - Effector delivery system (VFC0086)] [Escherichia coli VR50]																									1
VFG046096 (aec16) type VI secretion system tube protein Hcp [ACE T6SS (VF1122) - Effector delivery system (VFC0086)] [Escherichia coli VR50]		1.00422	0.949367		0.915612	1				1					1					1		1	1
VFG049189(gb|WP_014226431) (clpV) ATP-dependent chaperone ClpB [T6SS-II (VF0783) - Effector delivery system (VFC0086)] [Klebsiella oxytoca E718]	1	1	1	1	1	1	1	1	1	1	1	1	1	1	1	1	1	0.997669	1	1	1	1	1	1	1	1
VFG049192(gb|WP_008806080) (clpV) ATP-dependent chaperone ClpB [T6SS-II (VF0783) - Effector delivery system (VFC0086)] [Klebsiella pneumoniae 342]												1.00117						1
VFG049198(gb|WP_008806080) (clpV) ATP-dependent chaperone ClpB [T6SS-II (VF0783) - Effector delivery system (VFC0086)] [Klebsiella variicola At-22]	1.00039			1.00622	1	1	1.00117			0.916861			1.00117	1.00039		1.00039	1.00078		1		1.0066	0.993395		1.00894	1	1.00039
VFG049900 (tssM) Type VI secretion system protein TssM [T6SS (VF0579) - Effector delivery system (VFC0086)] [Shigella sonnei Ss046]		0.998948	1		1	1				0.998948					1					1		1
VFG049902(gb|WP_011310140) (tssM) Type VI secretion system protein TssM [T6SS (VF0579) - Effector delivery system (VFC0086)] [Shigella sonnei Ss046]		0.990476			0.989881	0.990476				0.990476					0.990476					0.993452		0.990476
VFG049910(gb|WP_000348788) (tssG) Type VI secretion system protein TssG [T6SS (VF0579) - Effector delivery system (VFC0086)] [Shigella sonnei Ss046]																						1
VFG049916(gb|WP_000103365) (vgrG/tssI) type VI secretion system effector VgrG [T6SS (VF0579) - Effector delivery system (VFC0086)] [Shigella sonnei Ss046]					1	1																1	1		0.988796
VFG049917(gb|WP_000508696) (rhs/PAAR) Type VI secretion system protein, PAAR family [T6SS (VF0579) - Effector delivery system (VFC0086)] [Shigella sonnei Ss046]		1.01354	1.01069	0.959373	1.00356	1.00119	1.02376			1.01473		1.01616	0.931575	0.973628	1.01069	0.927299	0.993348			1.02043	0.995486	1.01592	0.966025	0.979568	1.01402
VFG049125(gb|WP_004136054) (acrA) acriflavine resistance protein A [AcrAB (VF0568) - Antimicrobial activity/Competitive advantage (VFC0325)] [Klebsiella oxytoca E718]		1	1		1	1.00503		0.997487	0.99665		1	1						1	1	1.00168	1			1	1
VFG049126(gb|WP_004136054) (acrA) acriflavine resistance protein A [AcrAB (VF0568) - Antimicrobial activity/Competitive advantage (VFC0325)] [Klebsiella oxytoca KCTC 1686]	1						1.00084			1			1	1.00168		1	1.00084					1	1
VFG049131(gb|WP_004177236) (acrA) acriflavine resistance protein A [AcrAB (VF0568) - Antimicrobial activity/Competitive advantage (VFC0325)] [Klebsiella pneumoniae KCTC 2242]																									0.994975
VFG049133(gb|WP_004177236) (acrA) acriflavine resistance protein A [AcrAB (VF0568) - Antimicrobial activity/Competitive advantage (VFC0325)] [Klebsiella pneumoniae subsp. pneumoniae NTUH-K2044]		1		1	1.00084	1	1	1	1	1.00084	1			1	1		1	1		1		1.00168	1			1.00168
VFG049135(gb|WP_008805438) (acrA) acriflavine resistance protein A [AcrAB (VF0568) - Antimicrobial activity/Competitive advantage (VFC0325)] [Klebsiella variicola At-22]				1.00084	1.00084												1.00419
VFG049139(gb|WP_008805437) (acrB) acriflavine resistance protein B [AcrAB (VF0568) - Antimicrobial activity/Competitive advantage (VFC0325)] [Klebsiella pneumoniae 342]	1.00095		1.00095		1.00095		1.00095						1.00095	1.00095			1.00095				1.00095			1.00095	1.00095	1.00095
VFG049144(gb|WP_002892069) (acrB) acriflavine resistance protein B [AcrAB (VF0568) - Antimicrobial activity/Competitive advantage (VFC0325)] [Klebsiella pneumoniae subsp. pneumoniae NTUH-K2044]					0.939625					0.956784	1.00095		1.00508	0.934541		1.01303	0.937083		0.999047		0.919924	1.00159		0.996505	0.904671
VFG049145 (acrB) acriflavine resistance protein B [AcrAB (VF0568) - Antimicrobial activity/Competitive advantage (VFC0325)] [Klebsiella pneumoniae subsp. rhinoscleromatis SB3432]											0.978392															1.02765
VFG049146(gb|WP_012968813) (acrB) acriflavine resistance protein B [AcrAB (VF0568) - Antimicrobial activity/Competitive advantage (VFC0325)] [Klebsiella variicola At-22]		1.00095		1.00095		1.00095		1.00095	1.00095	1.00095		1.00095			1.00095	1.00095		1.00095	1.00095	1.00095		1.00095	1.00095
VFG049124(gb|WP_012737540) (allD) ureidoglycolate dehydrogenase [Allantion utilization (VF0572) - Nutritional/Metabolic factor (VFC0272)] [Klebsiella pneumoniae subsp. pneumoniae NTUH-K2044]											1
VFG049120(gb|WP_012737535) (allB) allantoinase [Allantion utilization (VF0572) - Nutritional/Metabolic factor (VFC0272)] [Klebsiella pneumoniae subsp. pneumoniae NTUH-K2044]	1	1	1	1	1	1	1	1	1	1	1	1	1	1	1	1	1	1	1	1	1	1	1	1		1
VFG048597(gb|WP_000784549) (fyuA) yersiniabactin receptor FyuA [Ybt (VF0564) - Nutritional/Metabolic factor (VFC0272)] [Klebsiella pneumoniae subsp. pneumoniae 1084]		1	1							1		1
VFG048590(gb|YP_005227769) (ybtT) type II thioesterase YbtT [Ybt (VF0564) - Nutritional/Metabolic factor (VFC0272)] [Klebsiella pneumoniae subsp. pneumoniae HS11286]							1			1		1
VFG048589(gb|WP_004175339) (ybtT) type II thioesterase YbtT [Ybt (VF0564) - Nutritional/Metabolic factor (VFC0272)] [Klebsiella pneumoniae subsp. pneumoniae 1084]			1
VFG048585(gb|WP_000982853) (ybtU) yersiniabactin biosynthesis oxidoreductase YbtU [Ybt (VF0564) - Nutritional/Metabolic factor (VFC0272)] [Klebsiella pneumoniae subsp. pneumoniae 1084]			1
VFG048553(gb|WP_014907291) (iroD) siderophore esterase IroD [Sal (VF0563) - Nutritional/Metabolic factor (VFC0272)] [Klebsiella pneumoniae subsp. pneumoniae 1084]				0.996764									0.996764	0.996764
VFG048549(gb|WP_004890934) (iroB) glucosyltransferase IroB [Sal (VF0563) - Nutritional/Metabolic factor (VFC0272)] [Klebsiella pneumoniae subsp. pneumoniae 1084]		0.997305	1	0.997305	0.997305	1		1	1	1			1	1
VFG046113(gb|WP_046072849) (irp1) yersiniabactin polyketide synthase HMWP1 [Yersiniabactin siderophore (VF1115) - Nutritional/Metabolic factor (VFC0272)] [Escherichia coli VR50]		1					1			1		1
VFG046110(gb|WP_001317926) (ybtP) yersiniabactin ABC transporter ATP-binding/permease protein YbtP [Yersiniabactin siderophore (VF1115) - Nutritional/Metabolic factor (VFC0272)] [Escherichia coli VR50]							1					1
VFG044172(gb|WP_000622316) (chuV) ATP-binding hydrophilic protein ChuV [Chu (VF0227) - Nutritional/Metabolic factor (VFC0272)] [Escherichia coli CFT073]																										1
VFG044171(gb|WP_000966628) (C_RS11765) TonB-dependent receptor [Direct heme uptake system (VF1160) - Nutritional/Metabolic factor (VFC0272)] [Escherichia coli CFT073]																0.996276	0.993948				0.995345			0.992551
VFG044165(gb|WP_001041793) (entS) enterobactin exporter, iron-regulated [Enterobactin (VF0228) - Nutritional/Metabolic factor (VFC0272)] [Escherichia coli CFT073]	1	1	1	1	1	1	1	1	1	1	1	1	1	1	1	1	1	1	1	1	1	1	1	1	1	1
VFG044159(gb|WP_000125846) (fes) enterobactin/ferric enterobactin esterase [Enterobactin (VF0228) - Nutritional/Metabolic factor (VFC0272)] [Escherichia coli CFT073]	1	1	1	1	1	1	1	1	1	1	1	1	1	1	1	1	1	1	1	1	1	1	1	1	1	1
VFG034347(gb|WP_000189349) (chuY) ChuY [Chu (VF0234) - Nutritional/Metabolic factor (VFC0272)] [Escherichia coli O17:K52:H18 str. UMN026]																						1
VFG034342(gb|WP_000189337) (chuY) ChuY [Chu (VF0234) - Nutritional/Metabolic factor (VFC0272)] [Escherichia coli O44:H18 042]											1
VFG034324(gb|WP_000020044) (chuX) putative heme-binding protein ChuX [Chu (VF0234) - Nutritional/Metabolic factor (VFC0272)] [Escherichia coli O44:H18 042]											1
VFG034306(gb|WP_001095638) (chuW) Putative oxygen independent coproporphyrinogen III oxidase [Chu (VF0234) - Nutritional/Metabolic factor (VFC0272)] [Escherichia coli O44:H18 042]											1
VFG034293(gb|WP_001322813) (chuT) periplasmic heme-binding protein ChuT [Chu (VF0234) - Nutritional/Metabolic factor (VFC0272)] [Escherichia coli O17:K52:H18 str. UMN026]											1
VFG034292(gb|WP_001312167) (chuT) periplasmic heme-binding protein ChuT [Chu (VF0234) - Nutritional/Metabolic factor (VFC0272)] [Escherichia coli NA114]																										1
VFG034280(gb|WP_000089586) (chuA) Outer membrane heme/hemoglobin receptor ChuA [Chu (VF0234) - Nutritional/Metabolic factor (VFC0272)] [Escherichia coli O83:H1 str. LF82]																										1
VFG034270(gb|WP_014639334) (chuA) Outer membrane heme/hemoglobin receptor ChuA [Chu (VF0234) - Nutritional/Metabolic factor (VFC0272)] [Escherichia coli O44:H18 042]											1
VFG034265(gb|WP_000089590) (chuA) Outer membrane heme/hemoglobin receptor ChuA [Chu (VF0234) - Nutritional/Metabolic factor (VFC0272)] [Escherichia coli O55:H7 str. CB9615]	1																		1			1
VFG034252(gb|WP_001017180) (chuS) heme oxygenase ChuS [Chu (VF0234) - Nutritional/Metabolic factor (VFC0272)] [Escherichia coli O44:H18 042]											1
VFG034238(gb|WP_000968127) (sitD) iron/manganese ABC transporter permease subunit SitD [Iron/manganese transport (VF1116) - Nutritional/Metabolic factor (VFC0272)] [Escherichia coli O17:K52:H18 str. UMN026]																										1
VFG034233(gb|WP_000968130) (sitD) iron/manganese ABC transporter permease subunit SitD [Iron/manganese transport (VF1116) - Nutritional/Metabolic factor (VFC0272)] [Escherichia coli O44:H18 042]																			1
VFG034224(gb|WP_001101732) (sitC) iron/manganese ABC transporter permease subunit SitC [Iron/manganese transport (VF1116) - Nutritional/Metabolic factor (VFC0272)] [Escherichia coli NA114]																										1
VFG034220(gb|WP_001101725) (sitC) iron/manganese ABC transporter permease subunit SitC [Iron/manganese transport (VF1116) - Nutritional/Metabolic factor (VFC0272)] [Escherichia coli O44:H18 042]																			1				1
VFG034207(gb|WP_000983720) (sitB) iron/manganese ABC transporter ATP-binding protein SitB [Iron/manganese transport (VF1116) - Nutritional/Metabolic factor (VFC0272)] [Escherichia coli O44:H18 042]																			1				1
VFG034198(gb|WP_000555630) (sitA) iron/manganese ABC transporter substrate-binding protein SitA [Iron/manganese transport (VF1116) - Nutritional/Metabolic factor (VFC0272)] [Escherichia coli NA114]																										1
VFG034194(gb|WP_000555618) (sitA) iron/manganese ABC transporter substrate-binding protein SitA [Iron/manganese transport (VF1116) - Nutritional/Metabolic factor (VFC0272)] [Escherichia coli O44:H18 042]																			1				1
VFG034189(gb|WP_000784549) (fyuA) siderophore yersiniabactin receptor FyuA [Yersiniabactin siderophore (VF1115) - Nutritional/Metabolic factor (VFC0272)] [Escherichia coli O18:K1:H7 str. IHE3034]																				1
VFG034183(gb|WP_001304267) (fyuA) siderophore yersiniabactin receptor FyuA [Yersiniabactin siderophore (VF1115) - Nutritional/Metabolic factor (VFC0272)] [Escherichia coli ABU 83972]							1.00828																			1.00828
VFG034169(gb|WP_001088826) (ybtE) yersiniabactin biosynthesis salycil-AMP ligase YbtE [Yersiniabactin siderophore (VF1115) - Nutritional/Metabolic factor (VFC0272)] [Escherichia coli O17:K52:H18 str. UMN026]			1									1
VFG034168(gb|WP_001088830) (ybtE) yersiniabactin biosynthesis salycil-AMP ligase YbtE [Yersiniabactin siderophore (VF1115) - Nutritional/Metabolic factor (VFC0272)] [Escherichia coli NA114]		1								1
VFG034135(gb|WP_000982866) (ybtU) yersiniabactin biosynthesis oxidoreductase YbtU [Yersiniabactin siderophore (VF1115) - Nutritional/Metabolic factor (VFC0272)] [Escherichia coli O17:K52:H18 str. UMN026]		1					1			1		1
VFG034126(gb|WP_000982870) (ybtU) yersiniabactin biosynthesis oxidoreductase YbtU [Yersiniabactin siderophore (VF1115) - Nutritional/Metabolic factor (VFC0272)] [Escherichia coli O104:H4 str. 2009EL-2050]																				1						1
VFG034121(gb|WP_000369485) (irp1) yersiniabactin polyketide synthase HMWP1 [Yersiniabactin siderophore (VF1115) - Nutritional/Metabolic factor (VFC0272)] [Escherichia coli O18:K1:H7 str. IHE3034]																										1
VFG034117 (irp1) polyketide synthase [Yersiniabactin siderophore (VF1115) - Nutritional/Metabolic factor (VFC0272)] [Escherichia coli NA114]																				0.984109
VFG034113(gb|WP_000369525) (irp1) yersiniabactin polyketide synthase HMWP1 [Yersiniabactin siderophore (VF1115) - Nutritional/Metabolic factor (VFC0272)] [Escherichia coli O44:H18 042]																				1
VFG034106(gb|WP_021565660) (irp2) amino acid adenylation domain-containing protein [Yersiniabactin siderophore (VF1115) - Nutritional/Metabolic factor (VFC0272)] [Escherichia coli UM146]		1.00254	0.997064							1.00274		0.999804								1.00039
VFG034101(gb|WP_000623067) (irp2) yersiniabactin non-ribosomal peptide synthetase HMWP2 [Yersiniabactin siderophore (VF1115) - Nutritional/Metabolic factor (VFC0272)] [Escherichia coli O17:K52:H18 str. UMN026]																										0.954813
VFG034096(gb|WP_000623033) (irp2) yersiniabactin non-ribosomal peptide synthetase HMWP2 [Yersiniabactin siderophore (VF1115) - Nutritional/Metabolic factor (VFC0272)] [Escherichia coli O44:H18 042]																				1						1
VFG034092(gb|WP_000623021) (irp2) yersiniabactin non-ribosomal peptide synthetase HMWP2 [Yersiniabactin siderophore (VF1115) - Nutritional/Metabolic factor (VFC0272)] [Escherichia coli O104:H4 str. 2009EL-2050]							1					1
VFG034090(gb|WP_000970687) (ybtA) yersiniabactin transcriptional regulator YbtA [Yersiniabactin siderophore (VF1115) - Nutritional/Metabolic factor (VFC0272)] [Escherichia coli O83:H1 str. LF82]																				1
VFG034075(gb|WP_000140405) (ybtA) yersiniabactin transcriptional regulator YbtA [Yersiniabactin siderophore (VF1115) - Nutritional/Metabolic factor (VFC0272)] [Escherichia coli O104:H4 str. 2009EL-2050]							1					1
VFG034064(gb|WP_001304268) (ybtP) yersiniabactin ABC transporter ATP-binding/permease protein YbtP [Yersiniabactin siderophore (VF1115) - Nutritional/Metabolic factor (VFC0272)] [Escherichia coli ABU 83972]																										1
VFG034062(gb|WP_001327954) (ybtP) yersiniabactin ABC transporter ATP-binding/permease protein YbtP [Yersiniabactin siderophore (VF1115) - Nutritional/Metabolic factor (VFC0272)] [Escherichia coli O44:H18 042]			1
VFG034056(gb|WP_001608389) (ybtQ) yersiniabactin ABC transporter ATP-binding/permease protein YbtQ [Yersiniabactin siderophore (VF1115) - Nutritional/Metabolic factor (VFC0272)] [Escherichia coli O83:H1 str. LF82]																				1
VFG034049(gb|WP_000654452) (ybtQ) yersiniabactin ABC transporter ATP-binding/permease protein YbtQ [Yersiniabactin siderophore (VF1115) - Nutritional/Metabolic factor (VFC0272)] [Escherichia coli NA114]		1								1
VFG034047(gb|WP_001304269) (ybtQ) yersiniabactin ABC transporter ATP-binding/permease protein YbtQ [Yersiniabactin siderophore (VF1115) - Nutritional/Metabolic factor (VFC0272)] [Escherichia coli ABU 83972]																										1
VFG034041(gb|WP_000654453) (ybtQ) yersiniabactin ABC transporter ATP-binding/permease protein YbtQ [Yersiniabactin siderophore (VF1115) - Nutritional/Metabolic factor (VFC0272)] [Escherichia coli O104:H4 str. 2009EL-2050]							1					1
VFG034032(gb|WP_001286284) (ybtX) yersiniabactin-associated zinc MFS transporter YbtX [Yersiniabactin siderophore (VF1115) - Nutritional/Metabolic factor (VFC0272)] [Escherichia coli NA114]		1								1
VFG034024(gb|WP_001286294) (ybtX) yersiniabactin-associated zinc MFS transporter YbtX [Yersiniabactin siderophore (VF1115) - Nutritional/Metabolic factor (VFC0272)] [Escherichia coli O104:H4 str. 2009EL-2050]							1					1
VFG034022(gb|WP_000703042) (ybtS) yersiniabactin biosynthesis salicylate synthase YbtS [Yersiniabactin siderophore (VF1115) - Nutritional/Metabolic factor (VFC0272)] [Escherichia coli O83:H1 str. LF82]																										1
VFG034014(gb|WP_000703040) (ybtS) yersiniabactin biosynthesis salicylate synthase YbtS [Yersiniabactin siderophore (VF1115) - Nutritional/Metabolic factor (VFC0272)] [Escherichia coli ABU 83972]		1								1										1
VFG034008(gb|WP_000703041) (ybtS) yersiniabactin biosynthesis salicylate synthase YbtS [Yersiniabactin siderophore (VF1115) - Nutritional/Metabolic factor (VFC0272)] [Escherichia coli O104:H4 str. 2009EL-2050]							1					1
VFG033958(gb|WP_000750130) (iucD) L-lysine 6-monooxygenase IucD [Aerobactin (VF0229) - Nutritional/Metabolic factor (VFC0272)] [Escherichia coli O7:K1 str. IAI39]																							1
VFG033944(gb|WP_000973519) (iutA) ferric aerobactin receptor precusor IutA [Aerobactin (VF0229) - Nutritional/Metabolic factor (VFC0272)] [Escherichia coli O7:K1 str. IAI39]																							1
VFG020176(gb|WP_001234317) (fepB) Fe2+-enterobactin ABC transporter substrate-binding protein [Enterobactin synthesis and transport (VF0984) - Nutritional/Metabolic factor (VFC0272)] [Shigella boydii CDC 3083-94]		1	1					1	1	1	1				1					1			1
VFG020174(gb|WP_077897083) (entD) enterobactin synthase subunit EntD [Enterobactin synthesis and transport (VF0984) - Nutritional/Metabolic factor (VFC0272)] [Shigella boydii CDC 3083-94]		1								1					1					1			1
VFG020173(gb|WP_000077778) (entF) enterobactin non-ribosomal peptide synthetase EntF [Enterobactin synthesis and transport (VF0984) - Nutritional/Metabolic factor (VFC0272)] [Shigella boydii CDC 3083-94]				1	1	1					1							1		1		1
VFG020172(gb|WP_012421470) (entC) isochorismate synthase EntC [Enterobactin synthesis and transport (VF0984) - Nutritional/Metabolic factor (VFC0272)] [Shigella boydii CDC 3083-94]				1			1					1	1	1		1	1		1		1		1	1	1
VFG013070(gb|WP_001626196) (shuV) ATP-binding component of hemin transport system [Shu (VF0256) - Nutritional/Metabolic factor (VFC0272)] [Shigella dysenteriae Sd197]	1										1								1			1
VFG013069(gb|WP_005019013) (shuU) permease of iron compound ABC transport system [Shu (VF0256) - Nutritional/Metabolic factor (VFC0272)] [Shigella dysenteriae Sd197]	1										1								1
VFG013068(gb|WP_000189360) (shuY) shu locus protein ShuY [Shu (VF0256) - Nutritional/Metabolic factor (VFC0272)] [Shigella dysenteriae Sd197]	1																		1
VFG013066 (shuW) heme anaerobic degradation radical SAM methyltransferase ChuW/HutW [Shu (VF0256) - Nutritional/Metabolic factor (VFC0272)] [Shigella dysenteriae Sd197]																			1			1
VFG013065(gb|WP_024259428) (shuT) periplasmic binding protein ShuT [Shu (VF0256) - Nutritional/Metabolic factor (VFC0272)] [Shigella dysenteriae Sd197]																			0.998907			1
VFG013037(gb|WP_000640969) (fepG) iron-enterobactin ABC transporter permease [Enterobactin synthesis and transport (VF0984) - Nutritional/Metabolic factor (VFC0272)] [Shigella boydii Sb227]	1								0.950655														1
VFG013036(gb|WP_000640961) (fepG) iron-enterobactin ABC transporter permease [Enterobactin synthesis and transport (VF0984) - Nutritional/Metabolic factor (VFC0272)] [Shigella flexneri 5 str. 8401]																			1
VFG013033(gb|WP_000640995) (fepG) iron-enterobactin ABC transporter permease [Enterobactin synthesis and transport (VF0984) - Nutritional/Metabolic factor (VFC0272)] [Shigella dysenteriae Sd197]		1	1	1	1	1	1	1	1	1	1	1	1	1	1	1	1	1		1	1	1		1	1
VFG013032(gb|WP_005141140) (fepD) Fe(3+)-siderophore ABC transporter permease [Enterobactin synthesis and transport (VF0984) - Nutritional/Metabolic factor (VFC0272)] [Shigella sonnei Ss046]											0.930348								1
VFG013031(gb|WP_001298899) (fepD) Fe(3+)-siderophore ABC transporter permease [Enterobactin synthesis and transport (VF0984) - Nutritional/Metabolic factor (VFC0272)] [Shigella boydii Sb227]		1	1					1	1	1	1				1			1					1
VFG013030(gb|WP_001298899) (fepD) Fe(3+)-siderophore ABC transporter permease [Enterobactin synthesis and transport (VF0984) - Nutritional/Metabolic factor (VFC0272)] [Shigella flexneri 5 str. 8401]				1	1	1	1					1	1	1		1	1			1	1			1	1
VFG013027(gb|WP_005019334) (fepD) Fe(3+)-siderophore ABC transporter permease [Enterobactin synthesis and transport (VF0984) - Nutritional/Metabolic factor (VFC0272)] [Shigella dysenteriae Sd197]	1																					1
VFG013022(gb|NP_706444) (fepC) iron-enterobactin ABC transporter ATP-binding protein [Enterobactin synthesis and transport (VF0984) - Nutritional/Metabolic factor (VFC0272)] [Shigella flexneri 2a str. 301]		1	1	1	1	1	1	1	1	1		1	1	1	1	1	1	1		1	1		1	1	1
VFG013021(gb|WP_000140647) (fepC) iron-enterobactin ABC transporter ATP-binding protein [Enterobactin synthesis and transport (VF0984) - Nutritional/Metabolic factor (VFC0272)] [Shigella dysenteriae Sd197]	1														0.990196				1			1
VFG013020(gb|WP_001234334) (fepB) Fe2+-enterobactin ABC transporter substrate-binding protein [Enterobactin synthesis and transport (VF0984) - Nutritional/Metabolic factor (VFC0272)] [Shigella sonnei Ss046]																						1
VFG013016(gb|NP_706448) (fepB) iron-enterobactin ABC transporter substrate-binding protein [Enterobactin synthesis and transport (VF0984) - Nutritional/Metabolic factor (VFC0272)] [Shigella flexneri 2a str. 301]					1	1												1	1
VFG013015(gb|WP_001234336) (fepB) Fe2+-enterobactin ABC transporter substrate-binding protein [Enterobactin synthesis and transport (VF0984) - Nutritional/Metabolic factor (VFC0272)] [Shigella dysenteriae Sd197]									0.994824					0.996894
VFG013014(gb|WP_001034921) (fepA) siderophore enterobactin receptor FepA [Enterobactin synthesis and transport (VF0984) - Nutritional/Metabolic factor (VFC0272)] [Shigella sonnei Ss046]		1						1	1	1					1					1			1
VFG013010(gb|NP_706439) (fepA) outer membrane receptor FepA [Enterobactin synthesis and transport (VF0984) - Nutritional/Metabolic factor (VFC0272)] [Shigella flexneri 2a str. 301]											1
VFG013009(gb|WP_001034900) (fepA) siderophore enterobactin receptor FepA [Enterobactin synthesis and transport (VF0984) - Nutritional/Metabolic factor (VFC0272)] [Shigella dysenteriae Sd197]	1		1	1	1	1	1					1	1	1		1	1	1	1		1	1		1	1
VFG013008(gb|WP_001370282) (entD) enterobactin synthase subunit EntD [Enterobactin synthesis and transport (VF0984) - Nutritional/Metabolic factor (VFC0272)] [Shigella sonnei Ss046]			1	1			1				1	1	1	1		1	1								1
VFG013005(gb|WP_001506608) (entD) enterobactin synthase subunit EntD [Enterobactin synthesis and transport (VF0984) - Nutritional/Metabolic factor (VFC0272)] [Shigella flexneri 2a str. 2457T]	1				1	1												1
VFG013004(gb|NP_706438) (entD) enterobactin synthase multienzyme complex phosphopantetheinyltransferase [Enterobactin synthesis and transport (VF0984) - Nutritional/Metabolic factor (VFC0272)] [Shigella flexneri 2a str. 301]								1	1							0.992063			1		1	1		1
VFG013002(gb|WP_000077683) (entF) enterobactin non-ribosomal peptide synthetase EntF [Enterobactin synthesis and transport (VF0984) - Nutritional/Metabolic factor (VFC0272)] [Shigella sonnei Ss046]		1	1				1	1	1	1		1	1	1	1	1	1				1		1	1	1
VFG012997(gb|WP_000077781) (entF) enterobactin non-ribosomal peptide synthetase EntF [Enterobactin synthesis and transport (VF0984) - Nutritional/Metabolic factor (VFC0272)] [Shigella dysenteriae Sd197]	1																		1
VFG012996(gb|WP_005141144) (entC) isochorismate synthase EntC [Enterobactin synthesis and transport (VF0984) - Nutritional/Metabolic factor (VFC0272)] [Shigella sonnei Ss046]		1	1		1	1		1	1	1					1			1		1
VFG012991(gb|WP_000381303) (entC) isochorismate synthase EntC [Enterobactin synthesis and transport (VF0984) - Nutritional/Metabolic factor (VFC0272)] [Shigella dysenteriae Sd197]	1										1											1
VFG012990(gb|WP_000026810) (entE) (2,3-dihydroxybenzoyl)adenylate synthase EntE [Enterobactin synthesis and transport (VF0984) - Nutritional/Metabolic factor (VFC0272)] [Shigella sonnei Ss046]																		1
VFG012989(gb|WP_000026762) (entE) (2,3-dihydroxybenzoyl)adenylate synthase EntE [Enterobactin synthesis and transport (VF0984) - Nutritional/Metabolic factor (VFC0272)] [Shigella boydii Sb227]		1	1	1	1	1	1	1	1	1	1.01179	1	1	1	1	1	1			1	1	1	1	1	1
VFG012988(gb|WP_000026772) (entE) (2,3-dihydroxybenzoyl)adenylate synthase EntE [Enterobactin synthesis and transport (VF0984) - Nutritional/Metabolic factor (VFC0272)] [Shigella flexneri 5 str. 8401]	1										1
VFG012985(gb|WP_000026832) (entE) (2,3-dihydroxybenzoyl)adenylate synthase EntE [Enterobactin synthesis and transport (VF0984) - Nutritional/Metabolic factor (VFC0272)] [Shigella dysenteriae Sd197]																			1
VFG012984(gb|WP_001007145) (entB) enterobactin biosynthesis bifunctional isochorismatase/aryl carrier protein EntB [Enterobactin synthesis and transport (VF0984) - Nutritional/Metabolic factor (VFC0272)] [Shigella sonnei Ss046]		1	1					1		1					1			1					1
VFG012983(gb|WP_001007129) (entB) enterobactin biosynthesis bifunctional isochorismatase/aryl carrier protein EntB [Enterobactin synthesis and transport (VF0984) - Nutritional/Metabolic factor (VFC0272)] [Shigella boydii Sb227]									1											1
VFG012980(gb|NP_706450) (entB) 2,3-dihydro-2,3-dihydroxybenzoate synthetase [Enterobactin synthesis and transport (VF0984) - Nutritional/Metabolic factor (VFC0272)] [Shigella flexneri 2a str. 301]	1			1			1					1	1	1		1	1		1		1	1		1	1
VFG012978(gb|WP_000347634) (entA) 2,3-dihydro-2,3-dihydroxybenzoate dehydrogenase EntA [Enterobactin synthesis and transport (VF0984) - Nutritional/Metabolic factor (VFC0272)] [Shigella sonnei Ss046]		1								1	1				1			1		1
VFG012977(gb|WP_000347664) (entA) 2,3-dihydro-2,3-dihydroxybenzoate dehydrogenase EntA [Enterobactin synthesis and transport (VF0984) - Nutritional/Metabolic factor (VFC0272)] [Shigella boydii Sb227]			1	1	1	1	1	1	1			1							1				1
VFG012973(gb|WP_000347670) (entA) 2,3-dihydro-2,3-dihydroxybenzoate dehydrogenase EntA [Enterobactin synthesis and transport (VF0984) - Nutritional/Metabolic factor (VFC0272)] [Shigella dysenteriae Sd197]	1												1	1		1	1				1	1		1	1
VFG012633(gb|WP_000792545) (ireA) TonB-dependent siderophore receptor IreA [Iron-regulated element (VF1117) - Nutritional/Metabolic factor (VFC0272)] [Escherichia coli CFT073]							1															1
VFG012631(gb|WP_000910402) (chuU) heme permease protein ChuU [Chu (VF0234) - Nutritional/Metabolic factor (VFC0272)] [Escherichia coli UTI89]																						1
VFG012630(gb|WP_000910399) (chuU) heme permease protein ChuU [Chu (VF0234) - Nutritional/Metabolic factor (VFC0272)] [Escherichia coli 536]																										1
VFG012624(gb|WP_000189357) (chuY) ChuY [Chu (VF0234) - Nutritional/Metabolic factor (VFC0272)] [Escherichia coli 536]																										1
VFG012615(gb|WP_000020049) (chuX) putative heme-binding protein ChuX [Chu (VF0234) - Nutritional/Metabolic factor (VFC0272)] [Escherichia coli O157:H7 str. EDL933]	1																		1			1
VFG012612(gb|WP_001095620) (chuW) Putative oxygen independent coproporphyrinogen III oxidase [Chu (VF0234) - Nutritional/Metabolic factor (VFC0272)] [Escherichia coli 536]																										1
VFG012609(gb|WP_000993317) (chuW) Putative oxygen independent coproporphyrinogen III oxidase [Chu (VF0234) - Nutritional/Metabolic factor (VFC0272)] [Escherichia coli O157:H7 str. EDL933]	1
VFG012603(gb|WP_001302516) (chuT) periplasmic heme-binding protein ChuT [Chu (VF0234) - Nutritional/Metabolic factor (VFC0272)] [Escherichia coli O157:H7 str. EDL933]	1
VFG012595(gb|WP_001017200) (chuS) heme oxygenase ChuS [Chu (VF0234) - Nutritional/Metabolic factor (VFC0272)] [Escherichia coli UTI89]																										1
VFG012592(gb|NP_312406) (chuS) heme oxygenase ChuS [Chu (VF0234) - Nutritional/Metabolic factor (VFC0272)] [Escherichia coli O157:H7 str. Sakai]	1																		1			1
VFG012590(gb|WP_000968139) (sitD) iron/manganese ABC transporter permease subunit SitD [Iron/manganese transport (VF1116) - Nutritional/Metabolic factor (VFC0272)] [Escherichia coli APEC O1]																							1
VFG012576(gb|WP_000983716) (sitB) iron/manganese ABC transporter ATP-binding protein SitB [Iron/manganese transport (VF1116) - Nutritional/Metabolic factor (VFC0272)] [Escherichia coli CFT073]																										1
VFG012566(gb|WP_001088828) (ybtE) yersiniabactin biosynthesis salycil-AMP ligase YbtE [Yersiniabactin siderophore (VF1115) - Nutritional/Metabolic factor (VFC0272)] [Escherichia coli APEC O1]																										1
VFG012565(gb|WP_001088833) (ybtE) yersiniabactin biosynthesis salycil-AMP ligase YbtE [Yersiniabactin siderophore (VF1115) - Nutritional/Metabolic factor (VFC0272)] [Escherichia coli UTI89]																				1
VFG012563 (ybtE) yersiniabactin biosynthesis salycil-AMP ligase YbtE [Yersiniabactin siderophore (VF1115) - Nutritional/Metabolic factor (VFC0272)] [Escherichia coli CFT073]							1.00063
VFG012561(gb|WP_000194283) (ybtT) yersiniabactin biosynthesis thioesterase YbtT [Yersiniabactin siderophore (VF1115) - Nutritional/Metabolic factor (VFC0272)] [Escherichia coli UTI89]																				1						1
VFG012559(gb|WP_000194283) (ybtT) yersiniabactin biosynthesis thioesterase YbtT [Yersiniabactin siderophore (VF1115) - Nutritional/Metabolic factor (VFC0272)] [Escherichia coli CFT073]		1
VFG012551 (irp1) L-histidine N(alpha)-methyltransferase [Yersiniabactin siderophore (VF1115) - Nutritional/Metabolic factor (VFC0272)] [Escherichia coli CFT073]		1.00092	1.00092				1.00092			1.00092		1.00092								1.00092						1.00092
VFG012550(gb|WP_000623043) (irp2) yersiniabactin non-ribosomal peptide synthetase HMWP2 [Yersiniabactin siderophore (VF1115) - Nutritional/Metabolic factor (VFC0272)] [Escherichia coli APEC O1]		1								1
VFG012547 (irp2) yersiniabactin non-ribosomal peptide synthetase HMWP2 [Yersiniabactin siderophore (VF1115) - Nutritional/Metabolic factor (VFC0272)] [Escherichia coli CFT073]		1	1				1					1								1						1
VFG012545(gb|WP_000140405) (ybtA) yersiniabactin transcriptional regulator YbtA [Yersiniabactin siderophore (VF1115) - Nutritional/Metabolic factor (VFC0272)] [Escherichia coli UTI89]			1
VFG012543(gb|WP_000970688) (ybtA) yersiniabactin transcriptional regulator YbtA [Yersiniabactin siderophore (VF1115) - Nutritional/Metabolic factor (VFC0272)] [Escherichia coli CFT073]		1								1																1
VFG012539(gb|WP_001327262) (ybtP) yersiniabactin ABC transporter ATP-binding/permease protein YbtP [Yersiniabactin siderophore (VF1115) - Nutritional/Metabolic factor (VFC0272)] [Escherichia coli CFT073]		1								1										1
VFG012537(gb|WP_001304269) (ybtQ) yersiniabactin ABC transporter ATP-binding/permease protein YbtQ [Yersiniabactin siderophore (VF1115) - Nutritional/Metabolic factor (VFC0272)] [Escherichia coli UTI89]			1
VFG012533(gb|WP_001286281) (ybtX) yersiniabactin-associated zinc MFS transporter YbtX [Yersiniabactin siderophore (VF1115) - Nutritional/Metabolic factor (VFC0272)] [Escherichia coli UTI89]			1																	1
VFG012531(gb|WP_001286281) (ybtX) yersiniabactin-associated zinc MFS transporter YbtX [Yersiniabactin siderophore (VF1115) - Nutritional/Metabolic factor (VFC0272)] [Escherichia coli CFT073]																										1
VFG012529(gb|WP_000703040) (ybtS) yersiniabactin biosynthesis salicylate synthase YbtS [Yersiniabactin siderophore (VF1115) - Nutritional/Metabolic factor (VFC0272)] [Escherichia coli UTI89]			1
VFG012526(gb|WP_000602863) (iucA) aerobactin siderophore biosynthesis protein IucD [Aerobactin (VF0229) - Nutritional/Metabolic factor (VFC0272)] [Escherichia coli APEC O1]																							1
VFG012524(gb|WP_000011907) (iucB) aerobactin siderophore biosynthesis protein IucB [Aerobactin (VF0229) - Nutritional/Metabolic factor (VFC0272)] [Escherichia coli APEC O1]																							1
VFG012522(gb|WP_001015721) (iucC) aerobactin siderophore biosynthesis protein IucC [Aerobactin (VF0229) - Nutritional/Metabolic factor (VFC0272)] [Escherichia coli APEC O1]																							1
VFG012515(gb|WP_001318220) (iroB) glucosyltransferase IroB [Salmochelin siderophore (VF0230) - Nutritional/Metabolic factor (VFC0272)] [Escherichia coli UTI89]																							1
VFG012513(gb|WP_001221122) (iroB) glucosyltransferase IroB [Salmochelin siderophore (VF0230) - Nutritional/Metabolic factor (VFC0272)] [Escherichia coli CFT073]																										1
VFG012512(gb|WP_001111199) (iroC) ATP binding cassette transporter [Salmochelin siderophore (VF0230) - Nutritional/Metabolic factor (VFC0272)] [Escherichia coli APEC O1]																							1
VFG012510(gb|WP_001298170) (iroC) ATP binding cassette transporter [Salmochelin siderophore (VF0230) - Nutritional/Metabolic factor (VFC0272)] [Escherichia coli 536]																										1
VFG012508(gb|WP_000933675) (iroD) esterase [Salmochelin siderophore (VF0230) - Nutritional/Metabolic factor (VFC0272)] [Escherichia coli APEC O1]																							1			1
VFG012502(gb|WP_000271273) (iroE) esterase [Salmochelin siderophore (VF0230) - Nutritional/Metabolic factor (VFC0272)] [Escherichia coli 536]																							1
VFG012501(gb|WP_000271272) (iroE) esterase [Salmochelin siderophore (VF0230) - Nutritional/Metabolic factor (VFC0272)] [Escherichia coli CFT073]																										1
VFG012500(gb|WP_001222186) (iroN) salmochelin receptor IroN [Salmochelin siderophore (VF0230) - Nutritional/Metabolic factor (VFC0272)] [Escherichia coli APEC O1]																							1
VFG003504(gb|WP_011816641) (irp2) yersiniabactin biosynthetic protein Irp2 [Yersiniabactin (VF0136) - Nutritional/Metabolic factor (VFC0272)] [Yersinia enterocolitica subsp. enterocolitica 8081]		0.962017
VFG000935(gb|WP_001222189) (iroN) salmochelin receptor IroN [Salmochelin siderophore (VF0230) - Nutritional/Metabolic factor (VFC0272)] [Escherichia coli CFT073]																										1
VFG000934(gb|WP_000348393) (entA) 2,3-dihydro-2,3-dihydroxybenzoate dehydrogenase EntA [Enterobactin (VF0228) - Nutritional/Metabolic factor (VFC0272)] [Escherichia coli CFT073]																										1
VFG000933(gb|WP_001007140) (entB) isochorismatase [Enterobactin (VF0228) - Nutritional/Metabolic factor (VFC0272)] [Escherichia coli CFT073]					1	1					1															1
VFG000932(gb|WP_000026784) (entE) 2,3-dihydroxybenzoate-AMP ligase component of enterobactin synthase multienzyme complex [Enterobactin (VF0228) - Nutritional/Metabolic factor (VFC0272)] [Escherichia coli CFT073]																										1
VFG000931(gb|WP_001336900) (entC) isochorismate synthase 1 [Enterobactin (VF0228) - Nutritional/Metabolic factor (VFC0272)] [Escherichia coli CFT073]																										1
VFG000930(gb|WP_000077767) (entF) enterobactin synthase multienzyme complex component, ATP-dependent [Enterobactin (VF0228) - Nutritional/Metabolic factor (VFC0272)] [Escherichia coli CFT073]																										1
VFG000929(gb|WP_001375021) (entD) phosphopantetheinyl transferase component of enterobactin synthase multienzyme complex [Enterobactin (VF0228) - Nutritional/Metabolic factor (VFC0272)] [Escherichia coli CFT073]																										1
VFG000928(gb|WP_000640938) (fepG) iron-enterobactin ABC transporter permease [Enterobactin (VF0228) - Nutritional/Metabolic factor (VFC0272)] [Escherichia coli CFT073]																										1
VFG000927(gb|WP_000096764) (fepE) LPS O-antigen length regulator [Enterobactin (VF0228) - Nutritional/Metabolic factor (VFC0272)] [Escherichia coli CFT073]	1	1	1	1	1	1	1	1	1	1	1	1	1	1	1	1.00176	1	1	1	1	1	1	1	1	1	1
VFG000926(gb|WP_001443194) (fepD) ferrienterobactin ABC transporter permease [Enterobactin (VF0228) - Nutritional/Metabolic factor (VFC0272)] [Escherichia coli CFT073]																										1
VFG000925(gb|WP_000140634) (fepC) ferrienterobactin ABC transporter ATPase [Enterobactin (VF0228) - Nutritional/Metabolic factor (VFC0272)] [Escherichia coli CFT073]											1															1
VFG000924(gb|WP_001234311) (fepB) ferrienterobactin ABC transporter periplasmic binding protein [Enterobactin (VF0228) - Nutritional/Metabolic factor (VFC0272)] [Escherichia coli CFT073]	1			1			1					1	1	1		1	1				1			1	1	1
VFG000923(gb|WP_001034892) (fepA) ferrienterobactin outer membrane transporter [Enterobactin (VF0228) - Nutritional/Metabolic factor (VFC0272)] [Escherichia coli CFT073]																										1
VFG000920(gb|WP_000020034) (chuX) putative heme-binding protein ChuX [Chu (VF0227) - Nutritional/Metabolic factor (VFC0272)] [Escherichia coli CFT073]																										1
VFG000363(gb|WP_002212775) (irp2) yersiniabactin biosynthetic protein Irp2 [Yersiniabactin (VF0136) - Nutritional/Metabolic factor (VFC0272)] [Yersinia pestis CO92]			1
VFG000362(gb|WP_002212777) (irp1) yersiniabactin biosynthetic protein Irp1 [Yersiniabactin (VF0136) - Nutritional/Metabolic factor (VFC0272)] [Yersinia pestis CO92]			1
VFG037909(gb|WP_000939041) (pseB) UDP-N-acetylglucosamine 4,6-dehydratase (inverting) [Capsule (VF0465) - Immune modulation (VFC0258)] [Acinetobacter baumannii 1656-2]							1					1
VFG048789(gb|WP_014838943) (ugd) UDP-glucose 6-dehydrogenase [Capsule (VF0560) - Immune modulation (VFC0258)] [Klebsiella oxytoca E718]								0.998286
VFG048794(gb|WP_049256767) (galF) GalU regulator GalF [Capsule (VF0560) - Immune modulation (VFC0258)] [Klebsiella pneumoniae JM45]	0.998878	0.998878		0.998878	0.998878	0.998878	1.00224	0.998878	0.998878	0.998878		1.00224	0.998878	0.998878	0.998878	0.998878	0.998878	0.998878	0.996633	0.998878	0.998878	0.998878	0.998878	0.998878	0.998878
VFG048799(gb|WP_024188874) (galF) GalU regulator GalF [Capsule (VF0560) - Immune modulation (VFC0258)] [Klebsiella variicola At-22]													0.998878
VFG048804(gb|YP_005227855) (KPHS_35550) dTDP-4-dehydrorhamnose 3,5-epimerase [Capsule (VF0560) - Immune modulation (VFC0258)] [Klebsiella pneumoniae subsp. pneumoniae HS11286]												1.01081
VFG048807(gb|WP_015958697) (rfbC) dTDP-4-dehydrorhamnose 3,5-epimerase [Capsule (VF0560) - Immune modulation (VFC0258)] [Klebsiella pneumoniae subsp. pneumoniae MGH 78578]							1.01081
VFG048815(gb|YP_005227856) (KPHS_35560) dTDP-4-dehydrorhamnose reductase [Capsule (VF0560) - Immune modulation (VFC0258)] [Klebsiella pneumoniae subsp. pneumoniae HS11286]							1					1
VFG048824(gb|WP_014907233) (gndA) NADP-dependent phosphogluconate dehydrogenase [Capsule (VF0560) - Immune modulation (VFC0258)] [Klebsiella pneumoniae subsp. pneumoniae 1084]										0.987918																1
VFG048828(gb|WP_004899420) (gndA) NADP-dependent phosphogluconate dehydrogenase [Capsule (VF0560) - Immune modulation (VFC0258)] [Klebsiella pneumoniae KCTC 2242]			1		1.00853	0.933902					1								1				0.997157
VFG048830(gb|WP_014907233) (gndA) NADP-dependent phosphogluconate dehydrogenase [Capsule (VF0560) - Immune modulation (VFC0258)] [Klebsiella pneumoniae subsp. pneumoniae NTUH-K2044]			0.998579		0.96162			0.99076			1.01279				1			0.993603					1
VFG048837(gb|YP_005227858) (KPHS_35580) dTDP-D-glucose 4,6-dehydratase [Capsule (VF0560) - Immune modulation (VFC0258)] [Klebsiella pneumoniae subsp. pneumoniae HS11286]							1					1
VFG048844(gb|WP_014838945) (gndA) NADP-dependent phosphogluconate dehydrogenase [Capsule (VF0560) - Immune modulation (VFC0258)] [Klebsiella oxytoca E718]							1					1	0.995736				0.999289	1	1					1.0199	1.00071	1.00711
VFG048845(gb|WP_004122486) (gndA) NADP-dependent phosphogluconate dehydrogenase [Capsule (VF0560) - Immune modulation (VFC0258)] [Klebsiella oxytoca KCTC 1686]								1	1											1.01919
VFG048851(gb|WP_015958700) (gndA) NADP-dependent phosphogluconate dehydrogenase [Capsule (VF0560) - Immune modulation (VFC0258)] [Klebsiella pneumoniae subsp. pneumoniae MGH 78578]	1	1	1.01493	1.01137	1	1	1	1	1	1	1.00498	1.00142	1.00213	1.02559	1	1	1	1.00711		1	1	1	1.00071	1		1
VFG048941(gb|WP_020953355) (gndA) NADP-dependent phosphogluconate dehydrogenase [Capsule (VF0560) - Immune modulation (VFC0258)] [Klebsiella pneumoniae subsp. rhinoscleromatis SB3432]						0.966596																			1
VFG048953(gb|WP_012967596) (gndA) NADP-dependent phosphogluconate dehydrogenase [Capsule (VF0560) - Immune modulation (VFC0258)] [Klebsiella variicola At-22]			0.981521								0.998579							1.00284		0.999289			1
VFG048968(gb|WP_012541090) (gndA) NADP-dependent phosphogluconate dehydrogenase [Capsule (VF0560) - Immune modulation (VFC0258)] [Klebsiella pneumoniae 342]				1			0.992182				1	0.996446	1	1	1.02701	1	1.00071	1	1		1.00213	1		1	1	1.00071
VFG048974(gb|WP_016946203) (galF) UTP--glucose-1-phosphate uridylyltransferase GalF [Capsule (VF0560) - Immune modulation (VFC0258)] [Klebsiella oxytoca E718]								1.00334	1.00334													1.00446	0.99777			1.00334
VFG048975(gb|WP_032719844) (galF) UTP--glucose-1-phosphate uridylyltransferase GalF [Capsule (VF0560) - Immune modulation (VFC0258)] [Klebsiella oxytoca KCTC 1686]																										1.00669
VFG048990(gb|WP_001741945) (galF) GalU regulator GalF [Capsule (VF0560) - Immune modulation (VFC0258)] [Klebsiella pneumoniae subsp. pneumoniae NTUH-K2044]			0.998878								0.998878															0.993266
VFG048993(gb|WP_001741945) (galF) GalU regulator GalF [Capsule (VF0560) - Immune modulation (VFC0258)] [Klebsiella pneumoniae subsp. pneumoniae MGH 78578]		1.00561																		1.00112
VFG049031(gb|WP_012967599) (KVAR_RS07885) mannose-1-phosphate guanylyltransferase/mannose-6-phosphate isomerase [LPS (VF0561) - Immune modulation (VFC0258)] [Klebsiella variicola At-22]	1							1	1		1
VFG049037(gb|WP_020956641) (cpsG) O9 family phosphomannomutase RfbK1 [LPS (VF0561) - Immune modulation (VFC0258)] [Klebsiella pneumoniae JM45]								1.00073	1.00073
VFG049042(gb|WP_012967600) (rfbK2) O9 family phosphomannomutase RfbK2 [LPS (VF0561) - Immune modulation (VFC0258)] [Klebsiella variicola At-22]	1.00072										1.00072
VFG049072(gb|WP_015958692) (KPN_RS29065) glycosyltransferase family 2 protein [LPS (VF0561) - Immune modulation (VFC0258)] [Klebsiella pneumoniae subsp. pneumoniae MGH 78578]							1					1
VFG049092(gb|WP_020956646) (N559_RS09110) glycosyltransferase family 4 protein [LPS (VF0561) - Immune modulation (VFC0258)] [Klebsiella pneumoniae JM45]	1							1	1		1
VFG049100(gb|WP_004184789) (KPK_RS08095) N-acetyl-alpha-D-glucosaminyl-diphospho-ditrans, octacis-undecaprenol 3-alpha-mannosyltransferase WbdC [LPS (VF0561) - Immune modulation (VFC0258)] [Klebsiella pneumoniae 342]	1							1	1		1
VFG049101(gb|WP_004184789) (N559_RS09115) N-acetyl-alpha-D-glucosaminyl-diphospho-ditrans, octacis-undecaprenol 3-alpha-mannosyltransferase WbdC [LPS (VF0561) - Immune modulation (VFC0258)] [Klebsiella pneumoniae JM45]	0.946237
VFG049103(gb|WP_004175258) (rfbA) glucose-1-phosphate thymidylyltransferase RfbA [LPS (VF0561) - Immune modulation (VFC0258)] [Klebsiella pneumoniae subsp. pneumoniae MGH 78578]							0.991954					0.991954
VFG012456(gb|WP_000820518) (cah) Ag43/Cah family autotransporter adhesin [Cah, AIDA-I type (VF1129) - Biofilm (VFC0271)] [Escherichia coli 536]																		1
VFG012458(gb|YP_026164) (agn43) CP4-44 prophage; self recognizing antigen 43 (Ag43) autotransporter [Antigen 43, AIDA-I type (VF1114) - Biofilm (VFC0271)] [Escherichia coli str. K-12 substr. MG1655]		1								1																1
VFG012459(gb|WP_000820423) (agn43) autotransporter adhesin Ag43 [Antigen 43, AIDA-I type (VF1114) - Biofilm (VFC0271)] [Escherichia coli CFT073]																										1
VFG033838(gb|WP_000820413) (agn43) autotransporter adhesin Ag43 [Antigen 43, AIDA-I type (VF1114) - Biofilm (VFC0271)] [Escherichia coli O26:H11 str. 11368]			1				1					1						1					1
VFG035970(gb|WP_014639610) (upaH) EntS/YbdA MFS transporter [UpaH, AIDA-I type (VF1126) - Biofilm (VFC0271)] [Escherichia coli ABU 83972]																										0.982666
VFG035971(gb|WP_024256145) (upaH) hypothetical protein [UpaH, AIDA-I type (VF1126) - Biofilm (VFC0271)] [Escherichia coli str. clone D i2]																										1.00289
VFG036012(gb|WP_000820546) (cah) Ag43/Cah family autotransporter adhesin [Cah, AIDA-I type (VF1129) - Biofilm (VFC0271)] [Escherichia coli O55:H7 str. CB9615]														0.999645
VFG036017(gb|WP_000820552) (cah) Ag43/Cah family autotransporter adhesin [Cah, AIDA-I type (VF1129) - Biofilm (VFC0271)] [Escherichia coli O103:H2 str. 12009]				0.999649
VFG036018(gb|WP_000820483) (cah) calcium-binding autotransporter Cah [Cah, AIDA-I type (VF1129) - Biofilm (VFC0271)] [Escherichia coli O26:H11 str. 11368]							1	1	1.00211			1		1.00211				1
VFG036019(gb|WP_000820574) (cah) Ag43/Cah family autotransporter adhesin [Cah, AIDA-I type (VF1129) - Biofilm (VFC0271)] [Escherichia coli O104:H4 str. 2009EL-2050]													0.999649
VFG036022(gb|WP_000820595) (cah) Ag43/Cah family autotransporter adhesin [Cah, AIDA-I type (VF1129) - Biofilm (VFC0271)] [Escherichia coli O44:H18 042]					1	1												0.988058				1
VFG036023(gb|WP_000820449) (cah) Ag43/Cah family autotransporter adhesin [Cah, AIDA-I type (VF1129) - Biofilm (VFC0271)] [Escherichia coli E24377A]								0.941342													1
VFG036026(gb|WP_000820483) (cah) calcium-binding autotransporter Cah [Cah, AIDA-I type (VF1129) - Biofilm (VFC0271)] [Escherichia coli UMNK88]		1	1	1	1	1				1			1		1	1			1	1
VFG045826(gb|WP_021526504) (cah) calcium-binding autotransporter Cah [Cah, AIDA-I type (VF1129) - Biofilm (VFC0271)] [Escherichia coli O25b:H4-ST131]			1														0.990868			1
VFG000863(gb|BAA94855) (east1) heat-stable enterotoxin 1 [EAST1 (VF0216) - Exotoxin (VFC0235)] [Escherichia coli O44:H18 042]	1		1	1	1	1		1	1				1	1	1			0.974359		1
VFG002039(gb|WP_001353651) (estIa) heat stable enterotoxin I [Heat-stable toxin (ST) (VF0211) - Exotoxin (VFC0235)] [Escherichia coli O78:H11:K80 str. H10407]	1	1		1			1			1	1	1	1	1
VFG002274(gb|WP_011009584) (plc) phospholipase C [Alpha-toxin (CpPLC) (VF0378) - Exotoxin (VFC0235)] [Clostridium perfringens str. 13]																					1.01671
VFG002275(gb|WP_003467630) (pfoA) perfringolysin O [Theta-toxin/PFO (VF0382) - Exotoxin (VFC0235)] [Clostridium perfringens str. 13]			0.996673
VFG012122(gb|WP_010968250) (cpb2) beta2-toxin [Beta2-toxin (VF0417) - Exotoxin (VFC0235)] [Clostridium perfringens str. 13]																					0.973684
VFG033876(gb|WP_000860471) (hlyD) Hemolysin D [-Hemolysin (VF0225) - Exotoxin (VFC0235)] [Escherichia coli ABU 83972]																							1			1
VFG033877(gb|WP_000860465) (hlyD) Hemolysin D [Hemolysin (VF0207) - Exotoxin (VFC0235)] [Escherichia coli UMNK88]	1	1	1	1	1	1	1	1	1	1	1	1	1	1	1	1	1	1	1	1	1	1		1	1
VFG033884(gb|WP_000376541) (hlyB) Hemolysin B [-Hemolysin (VF0225) - Exotoxin (VFC0235)] [Escherichia coli ABU 83972]																							1			1
VFG033885(gb|WP_000376538) (hlyB) Hemolysin B [Hemolysin (VF0207) - Exotoxin (VFC0235)] [Escherichia coli UMNK88]	1	1	1	1	1	1	1	1	1	1	1	1	1	1	1	1	1	1	1	1	1	1		1	1
VFG033892 (hlyA) Hemolysin A [-Hemolysin (VF0225) - Exotoxin (VFC0235)] [Escherichia coli ABU 83972]																							1			1
VFG033893(gb|WP_001142368) (hlyA) Hemolysin A [Hemolysin (VF0207) - Exotoxin (VFC0235)] [Escherichia coli UMNK88]	1	1	1	1	1	1	1	1	1	1	1	1	1	1	1	1	1	1	1	1	1	1		1	1
VFG033900(gb|WP_001519143) (hlyC) Hemolysin C [-Hemolysin (VF0225) - Exotoxin (VFC0235)] [Escherichia coli ABU 83972]																							1			1
VFG033901(gb|WP_015675120) (hlyC) Hemolysin C [Hemolysin (VF0207) - Exotoxin (VFC0235)] [Escherichia coli UMNK88]	1	1	1	1	1	1	1	1	1	1	1	1	1	1	1	1	1	1	1	1	1	1		1	1
VFG033903(gb|WP_000528122) (cnf1) cytotoxic necrotizing factor 1 [CNF-1 (VF0240) - Exotoxin (VFC0235)] [Escherichia coli ABU 83972]																							1			1
VFG036051(gb|WP_001336523) (hlyE/clyA) hemolysin HlyE [Hemolysin/cytolysin A (VF1134) - Exotoxin (VFC0235)] [Escherichia coli O111:H- str. 11128]		1			0.989035				0.998904							0.989035	0.989035	0.987939	1		0.989035
VFG036053 (hlyE/clyA) hemolysin E [Hemolysin/cytolysin A (VF1134) - Exotoxin (VFC0235)] [Escherichia coli O104:H4 str. 2009EL-2050]							0.914773	1		1.00142										1			1.00142	0.985795
VFG036057(gb|WP_001306826) (hlyE/clyA) hemolysin HlyE [Hemolysin/cytolysin A (VF1134) - Exotoxin (VFC0235)] [Escherichia coli O7:K1 str. IAI39]																							0.950658
VFG036058(gb|WP_001306826) (hlyE/clyA) hemolysin HlyE [Hemolysin/cytolysin A (VF1134) - Exotoxin (VFC0235)] [Escherichia coli O17:K52:H18 str. UMN026]											1
VFG036059(gb|WP_001336523) (hlyE/clyA) hemolysin HlyE [Hemolysin/cytolysin A (VF1134) - Exotoxin (VFC0235)] [Escherichia coli O78:H11:K80 str. H10407]				1		0.993421	1						1	1								0.995614			0.985746
VFG036060(gb|WP_143759181) (hlyE/clyA) hemolysin HlyE [Hemolysin/cytolysin A (VF1134) - Exotoxin (VFC0235)] [Escherichia coli O7:K1 str. CE10]	0.998993	0.998993	0.997986	1	0.988922	0.988922	0.998993	0.997986	0.997986	0.998993	0.998993	0.998993	0.998993	1	0.998993	0.988922	0.988922	0.987915	0.998993	0.997986	0.988922	0.998993	0.998993	0.988922	0.998993
VFG036061 (hlyE/clyA) hemolysin HlyE [Hemolysin/cytolysin A (VF1134) - Exotoxin (VFC0235)] [Escherichia coli O78:H18 str. WS3294A]			1					0.998902		1.0022					1.0011
VFG036062 (hlyE/clyA) hemolysin E [Hemolysin/cytolysin A (VF1134) - Exotoxin (VFC0235)] [Escherichia coli UM146]	1.02795	0.996894		0.996894	0.996894	0.996894	0.996894	0.996894	1	0.996894	0.996894	0.996894	0.996894	0.996894	0.996894	1	0.996894	1	0.996894	0.996894	0.996894	0.996894	0.996894	0.996894	0.968944
VFG036063(gb|WP_085948329) (hlyE/clyA) hemolysin E [Hemolysin/cytolysin A (VF1134) - Exotoxin (VFC0235)] [Escherichia coli O83:H1 str. LF82]		0.920513																								1
VFG036067(gb|WP_042634421) (eltA) heat-labile enterotoxin A prepeptide (from human) [Heat-labile toxin (LT) (VF0210) - Exotoxin (VFC0235)] [Escherichia coli UMNK88]			1	1		1		1	1				1	1
VFG036069(gb|WP_015675362) (eltB) enterotoxin subunit B (from human) [Heat-labile toxin (LT) (VF0210) - Exotoxin (VFC0235)] [Escherichia coli UMNK88]			1	1		1		1	1				1	1
VFG036074(gb|WP_000502504) (usp) type VI secretion system tube protein Hcp [Colicin-like Usp (VF1135) - Exotoxin (VFC0235)] [Escherichia coli APEC O1]																										1
VFG043757(gb|BAE86851) (stx2eA) shiga toxin 2 variant e A-subunit [Stx (VF0206) - Exotoxin (VFC0235)] [Escherichia coli str. ngsk-EC2e]															1	1	1
VFG043758(gb|BAE86852) (stx2eB) shiga toxin 2 variant e B-subunit [Stx (VF0206) - Exotoxin (VFC0235)] [Escherichia coli str. ngsk-EC2e]															1	1	1
VFG043822 (hlyE) hemolysin HlyE [ClyA (VF0988) - Exotoxin (VFC0235)] [Shigella dysenteriae 1012]												1	1.05618					0.987516				1
VFG043979(gb|AAA98063) (cba) colicin B [Colicin B (VF1181) - Exotoxin (VFC0235)] [Escherichia coli]						1																	1
VFG043980(gb|WP_001283355) (HS453_RS00480) colicin-like pore-forming protein [Colicin Ib (VF1184) - Exotoxin (VFC0235)] [Escherichia coli O113:H21 str. EH41]			1	1		1							1	1			1						1
VFG044066(gb|WP_000447001) (ECSMS35_RS25765) colicin-like pore-forming protein [Colicin E1 (VF1182) - Exotoxin (VFC0235)] [Escherichia coli SMS-3-5]						1.00192																				0.997446
VFG045328(gb|AHY03744) (east1) EAST1 [EAST1 (VF0188) - Exotoxin (VFC0235)] [Escherichia coli ONT:HND str. A16]			0.931624			1		0.923077	1
VFG018847 (fliC) flagellin [Flagella (VF0394) - Motility (VFC0204)] [Yersinia pestis Angola]													1.00362	1
VFG043072(gb|WP_000197360) (flgN) flagella biosynthesis chaperone FlgN [Peritrichous flagella (VF1154) - Motility (VFC0204)] [Escherichia coli O157:H7 str. EDL933]	1	1	1	1	1	1	1	1	1	1	1	1	1	1	1	1	1	1	1	1	1	1	1	1	1	1
VFG043073(gb|WP_000879706) (flgA) flagellar basal body P-ring formation protein FlgA [Peritrichous flagella (VF1154) - Motility (VFC0204)] [Escherichia coli O157:H7 str. EDL933]	1	1	1	1	1	1	1	1	1	1	1	1	1	1	1	1	1	1	1	1	1	1	1	1	1	1
VFG043074(gb|WP_000884708) (flgB) flagellar basal body rod protein FlgB [Peritrichous flagella (VF1154) - Motility (VFC0204)] [Escherichia coli O157:H7 str. EDL933]	1	1	1	1	1	1	1	1	1	1	1	1	1	1	1	1	1	1	1	1	1	1	1	1	1	1
VFG043075(gb|WP_001196460) (flgC) flagellar basal body rod protein FlgC [Peritrichous flagella (VF1154) - Motility (VFC0204)] [Escherichia coli O157:H7 str. EDL933]	1	1	1	1	1	1	1	1	1	1	1	1	1	1	1	1	1	1	1	1	1	1	1	1	1	1
VFG043076(gb|WP_000020482) (flgD) flagellar hook assembly protein FlgD [Peritrichous flagella (VF1154) - Motility (VFC0204)] [Escherichia coli O157:H7 str. EDL933]	1	1	1	1	1	1	1	1	1	1	1	1	1	1	1	1	1	1	1	1	1	1	1	1	1	1
VFG043077(gb|WP_000885860) (flgE) flagellar hook protein FlgE [Peritrichous flagella (VF1154) - Motility (VFC0204)] [Escherichia coli O157:H7 str. EDL933]	1	1	1	1.00249	1.00249	1.00249	1.00249	1	1	1	1	1.00249	1.00249	1.00249	1	1.00249	1.00249	1	1	1	1.00249	1	1	1.00249	1.00249	1
VFG043078(gb|WP_000349287) (flgF) flagellar basal-body rod protein FlgF [Peritrichous flagella (VF1154) - Motility (VFC0204)] [Escherichia coli O157:H7 str. EDL933]	1	1	1	1	1	1	1	1	1	1	1	1	1	1	1	1	1	1	1	1	1	1	1	1	1	1
VFG043079(gb|WP_000625837) (flgG) flagellar basal-body rod protein FlgG [Peritrichous flagella (VF1154) - Motility (VFC0204)] [Escherichia coli O157:H7 str. EDL933]	1	1	1	1	1	1	1	1	1	1	1	1	1	1	1	1	1	1	1	1	1	1	1	1	1	1
VFG043080(gb|WP_001295442) (flgH) flagellar basal body L-ring protein FlgH [Peritrichous flagella (VF1154) - Motility (VFC0204)] [Escherichia coli O157:H7 str. EDL933]	1	1	1	1	1	1	1	1	1	1	1	1	1	1	1	1	1	1	1	1	1	1	1	1	1	1
VFG043081(gb|WP_000589319) (flgI) flagellar basal body P-ring protein FlgI [Peritrichous flagella (VF1154) - Motility (VFC0204)] [Escherichia coli O157:H7 str. EDL933]	1	1	1	1	1	1	1	1	1	1	1	1	1	1	1	1	1	1	1	1	1	1	1	1	1	1
VFG043082(gb|WP_001301817) (flgJ) flagellar assembly peptidoglycan hydrolase FlgJ [Peritrichous flagella (VF1154) - Motility (VFC0204)] [Escherichia coli O157:H7 str. EDL933]	1	1	1	1	1	1	1	1	1	1	1	1	1	1	1	1	1	1	1	1	1	1	1	1	1	1
VFG043083(gb|WP_000096470) (flgK) flagellar hook-associated protein FlgK [Peritrichous flagella (VF1154) - Motility (VFC0204)] [Escherichia coli O157:H7 str. EDL933]	1	1	1	1	1	1	1	1	1	1	1	1	1	1	1	1	1	1	1	1	1	1	1	0.965328	1	1
VFG043084(gb|WP_001212790) (flgL) flagellar hook-associated protein FlgL [Peritrichous flagella (VF1154) - Motility (VFC0204)] [Escherichia coli O157:H7 str. EDL933]	1	1	1	1	1	1	1	1	1	1	1	1	1	1	1	1	1	1	1	1	1	1	1	1	1	1
VFG043085(gb|WP_001259575) (flhe) flagellar protein FlhE [Peritrichous flagella (VF1154) - Motility (VFC0204)] [Escherichia coli O157:H7 str. EDL933]	1	1	1	1	1	1	1	1	1	1	1	1	1	1	1	1	1	1	1	1	1	1	1	1	1	1
VFG043086(gb|WP_000067016) (flhA) flagellar biosynthesis protein FlhA [Peritrichous flagella (VF1154) - Motility (VFC0204)] [Escherichia coli O157:H7 str. EDL933]	1	1	1	1	1	1	1	1	1	1	1	1	1	1	1	1	1	1	1	1	1	1	1	1	1	1
VFG043087(gb|WP_001278933) (flhB) flagellar type III secretion system protein FlhB [Peritrichous flagella (VF1154) - Motility (VFC0204)] [Escherichia coli O157:H7 str. EDL933]	1	1	1	1	1	1	1	1	1	1	1	1	1	1	1	1	1	1	1	1	1	1	1	1	1	1
VFG043088(gb|WP_000983602) (cheZ) protein phosphatase CheZ [Peritrichous flagella (VF1154) - Motility (VFC0204)] [Escherichia coli O157:H7 str. EDL933]	1	1	1	1	1	1	1	1	1	1	1	1	1	1	1	1	1	1	1	1	1	1	1	1	1	1
VFG043089(gb|WP_000763867) (cheY) chemotaxis response regulator CheY [Peritrichous flagella (VF1154) - Motility (VFC0204)] [Escherichia coli O157:H7 str. EDL933]	1	1	1	1	1	1	1	1	1	1	1	1	1	1	1	1	1	1	1	1	1	1	1	1	1	1
VFG043090(gb|WP_000036413) (cheB) protein-glutamate methylesterase/protein glutamine deamidase [Peritrichous flagella (VF1154) - Motility (VFC0204)] [Escherichia coli O157:H7 str. EDL933]	1	1	1	1	1	1	1	1	1	1	1	1	1	1	1	1	1	1	1	1	1	1	1	1	1	1
VFG043091(gb|WP_000204340) (cheR) protein-glutamate O-methyltransferase CheR [Peritrichous flagella (VF1154) - Motility (VFC0204)] [Escherichia coli O157:H7 str. EDL933]	1	1	1	1	1	1	1	1	1	1	1	1	1	1	1	1	1		1	1	1	1	1	1	1	1
VFG043092(gb|WP_010904770) (tar) methyl-accepting chemotaxis protein II [Peritrichous flagella (VF1154) - Motility (VFC0204)] [Escherichia coli O157:H7 str. EDL933]	1	1	1	1	1	1	1	1	1	1	1	1	1	1	1	1	1	0.992178	1	1	1	1	1	1	1	1
VFG043093(gb|WP_000147304) (cheW) chemotaxis protein CheW [Peritrichous flagella (VF1154) - Motility (VFC0204)] [Escherichia coli O157:H7 str. EDL933]	1	1	1	1	1	1	1	1	1	1	1	1	1	1	1	1	1	1	1	1	1	1	1	1	1	1
VFG043094(gb|WP_001322280) (cheA) chemotaxis protein CheA [Peritrichous flagella (VF1154) - Motility (VFC0204)] [Escherichia coli O157:H7 str. EDL933]	1	1	1	1	1	1	1	1	1	1	1	1	1	1	1	1	1	1.00051	0.999491	1	1	1	1	1.0117	1	1
VFG043095(gb|WP_000795630) (motB) flagellar motor protein MotB [Peritrichous flagella (VF1154) - Motility (VFC0204)] [Escherichia coli O157:H7 str. EDL933]	1	1	1	1	1	1	1	1	1	1	1	1	1	1	1	1	1	1	1	1	1	1	1	1	1	1
VFG043096(gb|WP_000906325) (motA) flagellar motor stator protein MotA [Peritrichous flagella (VF1154) - Motility (VFC0204)] [Escherichia coli O157:H7 str. EDL933]	1	1	1	1	1	1	1	1	1	1	1	1	1	1	1	1	1	1	1	1	1	1	1	1	1	1
VFG043097(gb|WP_001291603) (flhC) flagellar transcriptional regulator FlhC [Peritrichous flagella (VF1154) - Motility (VFC0204)] [Escherichia coli O157:H7 str. EDL933]	1	1	1	1	1	1	1	1	1	1	1	1	1	1	1	1	1	1	1	1	1	1	1	1	1	1
VFG043098(gb|WP_001302091) (flhD) flagellar transcriptional regulator FlhD [Peritrichous flagella (VF1154) - Motility (VFC0204)] [Escherichia coli O157:H7 str. EDL933]	1	1	1	1	1	1	1	1	1	1	1	1	1	1	1	1	1	1	1	1	1	1	1	1	1	1
VFG043099(gb|WP_001302033) (tcyJ) cystine ABC transporter substrate-binding protein [Peritrichous flagella (VF1154) - Motility (VFC0204)] [Escherichia coli O157:H7 str. EDL933]	1	1	1	1	1	1	1	1	1	1	1	1	1	1	1	1	1	1	1	1	1	1	1	1	1	1
VFG043100(gb|WP_001302103) (fliZ) flagella biosynthesis regulatory protein FliZ [Peritrichous flagella (VF1154) - Motility (VFC0204)] [Escherichia coli O157:H7 str. EDL933]	1	1	1	1	1	1	1	1	1	1	1	1	1	1	1	1	1	1	1	1	1	1	1	1	1	1
VFG043101(gb|WP_001087467) (fliA) RNA polymerase sigma factor FliA [Peritrichous flagella (VF1154) - Motility (VFC0204)] [Escherichia coli O157:H7 str. EDL933]	1	1	1	1	1	1	1	1	1	1	1	1	1	1	1	1	1	1	1	1	1	1	1	1	1	1
VFG043102(gb|WP_000079723) (Z_RS14145) FliC/FljB family flagellin [Peritrichous flagella (VF1154) - Motility (VFC0204)] [Escherichia coli O157:H7 str. EDL933]																		1
VFG043103(gb|WP_000146755) (fliD) flagellar filament capping protein FliD [Peritrichous flagella (VF1154) - Motility (VFC0204)] [Escherichia coli O157:H7 str. EDL933]	1.00429	1.00644			1.00072	1.00072	1.00644	1.00644	1.00644	1.00644	1.00644	1.00644			1.00644	1.00644	1.00644	1.00644	1.00644	1	1.00644	1.00644	1.00644	0.935622	1.00644
VFG043104(gb|WP_000270418) (fliS) flagellar export chaperone FliS [Peritrichous flagella (VF1154) - Motility (VFC0204)] [Escherichia coli O157:H7 str. EDL933]	1	1	0.93674	1	1	1	1	1	1	1	1	1	1	1	1	1	1	1	1	1	1	1	1	1	1	1
VFG043105(gb|WP_001015033) (fliT) flagella biosynthesis regulatory protein FliT [Peritrichous flagella (VF1154) - Motility (VFC0204)] [Escherichia coli O157:H7 str. EDL933]	1	1	1	1	1	1	1	1	1	1	1	1	1	1	1	1	1	1	1	1	1	1	1	1	1	1
VFG043106(gb|WP_001274299) (fliE) flagellar hook-basal body complex protein FliE [Peritrichous flagella (VF1154) - Motility (VFC0204)] [Escherichia coli O157:H7 str. EDL933]	1	1	1	1	1	1	1	1	1	1	1	1	1	1	1	1	1	1	1	1	1	1	1	1	1	1
VFG043107(gb|WP_000994443) (fliF) flagellar M-ring protein FliF [Peritrichous flagella (VF1154) - Motility (VFC0204)] [Escherichia coli O157:H7 str. EDL933]	1	1	1	1	1	1	1	1	1	1	1	1	1	1	1	1	1	1	1	1	1	1	1	1	1	1
VFG043108(gb|WP_000067959) (fliG) flagellar motor switch protein FliG [Peritrichous flagella (VF1154) - Motility (VFC0204)] [Escherichia coli O157:H7 str. EDL933]	1	1	1	1	1	1	1	1	1	1	1	1	1	1	1	1	1	1	1	1	1	1	1	1	1	1
VFG043109(gb|WP_001282715) (fliH) flagellar assembly protein FliH [Peritrichous flagella (VF1154) - Motility (VFC0204)] [Escherichia coli O157:H7 str. EDL933]	0.982533	1	1	1	1	1	1	1	1	1	1	1	1	1	1	1	1	1	1	1	1	1	1	1	1	1
VFG043110(gb|WP_000213294) (fliI) flagellum-specific ATP synthase FliI [Peritrichous flagella (VF1154) - Motility (VFC0204)] [Escherichia coli O157:H7 str. EDL933]	1	1	1	1	1	1	1	1	1	1	1	1	1	1	1	1	1	1	1	1	1	1	1	1	1	1
VFG043111(gb|WP_000807584) (fliJ) flagella biosynthesis chaperone FliJ [Peritrichous flagella (VF1154) - Motility (VFC0204)] [Escherichia coli O157:H7 str. EDL933]	1	1	1	1	1	1	1	1	1	1	1	1	1	1	1	1	1	1	1	1	1	1	1	1	1	1
VFG043112(gb|WP_000620074) (fliK) flagellar hook length control protein FliK [Peritrichous flagella (VF1154) - Motility (VFC0204)] [Escherichia coli O157:H7 str. EDL933]	1	1	1	1	1	1	1	1	1	1	1	1	1	1	1	1	1	1	1	1	1	1	1	1	0.99734	1
VFG043113(gb|WP_000133106) (fliL) flagellar basal body-associated protein FliL [Peritrichous flagella (VF1154) - Motility (VFC0204)] [Escherichia coli O157:H7 str. EDL933]	1	1	1	1	1	1	1	1	1	1	1	1	1	1	1	1	1	1	1	1	1	1	1	1	1	1
VFG043114(gb|WP_010904778) (fliM) flagellar motor switch protein FliM [Peritrichous flagella (VF1154) - Motility (VFC0204)] [Escherichia coli O157:H7 str. EDL933]	1	1	1	1	1.01294	1	1	1	1	1	1	1	1	1	1	1	1	1	1	1	1	1	1	1	1	1
VFG043115(gb|WP_001282098) (fliN) flagellar motor switch protein FliN [Peritrichous flagella (VF1154) - Motility (VFC0204)] [Escherichia coli O157:H7 str. EDL933]	1	1	1	1	1	1	1	1	1	1	1	1	1	1	1	1	1	1	1	1	1	1	1	1	1	1
VFG043116(gb|WP_001302429) (fliO) flagellar type III secretion system protein FliO [Peritrichous flagella (VF1154) - Motility (VFC0204)] [Escherichia coli O157:H7 str. EDL933]	1	1	1	1	1	1	1	1	1	1	1	1	1	1	1	1	1	1	1	1	1	1	1	1	1	1
VFG043117(gb|WP_001253441) (fliP) flagellar type III secretion system pore protein FliP [Peritrichous flagella (VF1154) - Motility (VFC0204)] [Escherichia coli O157:H7 str. EDL933]	1	1	1	1	1	1	1	1	1	1	1	1	1	1	1	1	1	1	1	1	1	1	1	1	1	1
VFG043118(gb|WP_000187358) (fliQ) flagellar biosynthesis protein FliQ [Peritrichous flagella (VF1154) - Motility (VFC0204)] [Escherichia coli O157:H7 str. EDL933]	1	1	1	1	1	1	1	1	1	1	1	1	1	1	1	1	1	1	1	1	1	1	1	1	1	1
VFG043119(gb|WP_000942326) (fliR) flagellar type III secretion system protein FliR [Peritrichous flagella (VF1154) - Motility (VFC0204)] [Escherichia coli O157:H7 str. EDL933]	1	1	1	1	1	1	1	1	1	1	1	1	1	1	1	1	1	0.996183	1	1	1	1	1	1	1	1
VFG043120(gb|WP_000615801) (flk) flagella biosynthesis regulator Flk [Peritrichous flagella (VF1154) - Motility (VFC0204)] [Escherichia coli O157:H7 str. EDL933]	1	1	1	1	1	1	1	1	1	1	1	1	1	1	1	1	1	1	1	1	1	1	1		1	1
VFG013087(gb|WP_005027201) (msbB2) lauroyl-Kdo(2)-lipid IV(A) myristoyltransferase [MsbB2 (VF0981) - Others (VFC0346)] [Shigella boydii Sb227]				1	1	1					1		1	1
VFG020186(gb|WP_012421771) (virK) virulence factor VirK [VirK (VF0980) - Others (VFC0346)] [Shigella boydii CDC 3083-94]					1	1					1
VFG002280(gb|WP_011010361) (nagK) hyaluronidase [Mu-toxin (VF0389) - Exoenzyme (VFC0251)] [Clostridium perfringens str. 13]						0.999714
VFG012158(gb|WP_011591929) (nanH) sialidase [Sialidase (VF0391) - Exoenzyme (VFC0251)] [Clostridium perfringens SM101]																							1

## Sheet: Table_S5_C. perfringnes VF cove
# refSequence	DTU_2024_1035978_100_SI_CP_10C.mapstat	DTU_2024_1035979_100_SI_CP_11D.mapstat	DTU_2024_1035980_100_SI_CP_12D.mapstat	DTU_2024_1035981_100_SI_CP_14A.mapstat	DTU_2024_1035982_100_SI_CP_15B.mapstat	DTU_2024_1035983_100_SI_CP_26D.mapstat	DTU_2024_1035984_100_SI_CP_27B.mapstat	DTU_2024_1035985_100_SI_CP_32A.mapstat	DTU_2024_1035986_100_SI_CP_43C.mapstat	DTU_2024_1035987_100_SI_CP_46A.mapstat	DTU_2024_1035988_100_SI_CP_50D.mapstat	DTU_2024_1035989_100_SI_CP_52B.mapstat	DTU_2024_1035990_100_SI_CP_59B.mapstat	DTU_2024_1035991_100_SI_CP_60B.mapstat	DTU_2024_1035992_100_SI_CP_61B.mapstat	DTU_2024_1035993_100_SI_CP_68B.mapstat	DTU_2024_1035994_100_SI_CP_78B.mapstat	DTU_2024_1035995_100_SI_CP_83B.mapstat	DTU_2024_1035996_100_SI_CP_93B.mapstat	DTU_2024_1035997_100_SI_CP_94C.mapstat	DTU_2024_1035998_100_SI_CP_97A.mapstat	DTU_2024_1035999_100_SI_CP_100B.mapstat	DTU_2024_1036000_100_SI_CP_102A.mapstat
VFG012097(gb|WP_003462314) (groEL) chaperonin GroEL [GroEL (VF0594) - Adherence (VFC0001)] [Clostridium perfringens str. 13]		1	1	1	1	1	1		1			1	1	1			1	1	1	1	1		1
VFG012098(gb|WP_003454479) (groEL) chaperonin GroEL [GroEL (VF0594) - Adherence (VFC0001)] [Clostridium perfringens ATCC 13124]	1							1		1	1				1	1						1
VFG012106(gb|WP_011010639) (fbpA/fbp68) fibronectin-binding protein FbpA [FbpA/Fbp68 (VF0595) - Adherence (VFC0001)] [Clostridium perfringens str. 13]		1		1	1	1	1	1	1	1		1	1	1	1	1	1	1	1	1	1		1
VFG012107(gb|WP_011590967) (fbpA/fbp68) fibronectin-binding protein FbpA [FbpA/Fbp68 (VF0595) - Adherence (VFC0001)] [Clostridium perfringens ATCC 13124]	1		1								1											1
VFG018198(gb|NP_414827) (yagZ/ecpA) E. coli common pilus structural subunit EcpA [ECP (VF0404) - Adherence (VFC0001)] [Escherichia coli str. K-12 substr. MG1655]																					1
VFG018205(gb|NP_414826) (yagY/ecpB) E. coli common pilus chaperone EcpB [ECP (VF0404) - Adherence (VFC0001)] [Escherichia coli str. K-12 substr. MG1655]																					1.00448
VFG018211(gb|NP_414825) (yagX/ecpC) E. coli common pilus usher EcpC [ECP (VF0404) - Adherence (VFC0001)] [Escherichia coli str. K-12 substr. MG1655]																					0.994062
VFG034393(gb|WP_001301257) (ykgK/ecpR) regulator protein EcpR [ECP (VF0404) - Adherence (VFC0001)] [Escherichia coli O78:H11:K80 str. H10407]																					1.00184
VFG042830(gb|WP_003451114) (CPE_RS09090) type IV pilus twitching motility protein PilT [Type IV pili (VF0731) - Adherence (VFC0001)] [Clostridium perfringens str. 13]	1	1	1	1	1	1	1	1	1	1	1	1	1	1	1	1	1	1	1	1	1	1	1
VFG042831(gb|WP_011010635) (CPE_RS09465) type II secretion system F family protein [Type IV pili (VF0731) - Adherence (VFC0001)] [Clostridium perfringens str. 13]	1	1	1	1	1	1	1	1	1	1	1	1	1	1	1	1	1	1	1	1	1	1	1
VFG042832(gb|WP_011010636) (CPE_RS09470) GspE/PulE family protein [Type IV pili (VF0731) - Adherence (VFC0001)] [Clostridium perfringens str. 13]	1	1	1	1	1	1	1	1	1	1	1	1	1	1	1	1	1	1	1	1	1	1	1
VFG042833(gb|WP_011010855) (CPE_RS11815) hypothetical protein [Type IV pili (VF0731) - Adherence (VFC0001)] [Clostridium perfringens str. 13]	0.997712	1	1	1	1	1	1	1	1			1	1	1	1		1	1	1	1	1		1
VFG042834(gb|WP_003454175) (CPE_RS11820) prepilin-type N-terminal cleavage/methylation domain-containing protein [Type IV pili (VF0731) - Adherence (VFC0001)] [Clostridium perfringens str. 13]	1	1	1	1	1	1	1	1	1			1	1	1	1		0.994652	1	1	1	1		1
VFG042835(gb|WP_003462275) (CPE_RS11825) type II secretion system GspH family protein [Type IV pili (VF0731) - Adherence (VFC0001)] [Clostridium perfringens str. 13]	1	1	1	1	1	1	1	1	1			1	1	1	1		1	1	1	1	1		1
VFG042836(gb|WP_011010856) (CPE_RS11830) prepilin-type N-terminal cleavage/methylation domain-containing protein [Type IV pili (VF0731) - Adherence (VFC0001)] [Clostridium perfringens str. 13]	1	1	1	1	1	1	1	1	1			1	1	1	1		1	1	1	1	1		1
VFG042837(gb|WP_011010857) (CPE_RS11835) hypothetical protein [Type IV pili (VF0731) - Adherence (VFC0001)] [Clostridium perfringens str. 13]	1	1	1	1	1	1	1	1	1	1	1	1	1	1	1	1	1	1	1	1	1	1	1
VFG042838(gb|WP_011010858) (CPE_RS11840) PilN domain-containing protein [Type IV pili (VF0731) - Adherence (VFC0001)] [Clostridium perfringens str. 13]	1	1	1	1	1	1	1	1	1	1	1	1	1	1	1	1	1	1	1	1	1	1	1
VFG042839(gb|WP_011010859) (pilM) pilus assembly protein PilM [Type IV pili (VF0731) - Adherence (VFC0001)] [Clostridium perfringens str. 13]	1	1	1	1	1	1	1	1	1	1	1	1	1	1	1	1	1	1	1	1	1	1	1
VFG042840(gb|WP_011010860) (CPE_RS11850) prepilin-type N-terminal cleavage/methylation domain-containing protein [Type IV pili (VF0731) - Adherence (VFC0001)] [Clostridium perfringens str. 13]	0.947177				0.961749												0.961749		0.961749
VFG042841(gb|WP_011010861) (CPE_RS11855) type II secretion system F family protein [Type IV pili (VF0731) - Adherence (VFC0001)] [Clostridium perfringens str. 13]	1	1	1	1	1	1	1	1	1	1	1	1	1	1	1	1	1	1	1	1	1	1	1
VFG042842(gb|WP_011010862) (tadA) Flp pilus assembly complex ATPase component TadA [Type IV pili (VF0731) - Adherence (VFC0001)] [Clostridium perfringens str. 13]	0.998227	0.998227	1	0.998227	0.998227	0.998227	0.998227	0.998227	0.998227	0.998227	1	0.998227	0.998227	0.998227	0.998227	0.998227	0.998227	0.998227	0.998227	0.998227	0.998227	1.00177	0.998227
VFG042843(gb|WP_003462279) (CPE_RS11865) A24 family peptidase [Type IV pili (VF0731) - Adherence (VFC0001)] [Clostridium perfringens str. 13]	1	1	1	1	1	1	1	1	1	1	1	1	1	1	1	1	1	1	1	1	1	1	1
VFG042844(gb|WP_011010863) (CPE_RS11870) type II secretion system GspH family protein [Type IV pili (VF0731) - Adherence (VFC0001)] [Clostridium perfringens str. 13]	1	1	1	1	1	1	1	1	1	1	1	1	1	1	1	1	1	1	1	1	1	1	1
VFG043440(gb|WP_011010006) (CPE_RS04085) elongation factor G-binding protein [FbpA/Fbp68 (VF0595) - Adherence (VFC0001)] [Clostridium perfringens str. 13]	1	1	1	1	0.996983	1	1	1	1	1	0.992459	1	1	1	1	1	0.996983	1	1	1	1	1	1
VFG046029(gb|WP_000157287) (hcpC) protein transport protein HofC [Hemorrhagic E.coli pilus (HCP) (VF1141) - Adherence (VFC0001)] [Escherichia coli O44:H18 042]		0.972569
VFG050211(gb|WP_010968279) (cna) collagen adhesin [Cna (VF0730) - Adherence (VFC0001)] [Clostridium perfringens str. 13]		1		1	0.933528	1	1		1			1	1	1			0.99927	0.999513	1	1	1	1	1
VFG002056 (gspM) general secretion pathway protein M [T2SS (VF0333) - Effector delivery system (VFC0086)] [Shigella dysenteriae Sd197]				0.998138
VFG034866(gb|WP_000900547) (espX4) Type III secretion system effector EspX4 [TTSS secreted effectors (VF1110) - Effector delivery system (VFC0086)] [Escherichia coli O157:H7 str. EDL933]				0.998735
VFG035443(gb|WP_001284199) (aec32) Hcp family type VI secretion system effector [ACE T6SS (VF1122) - Effector delivery system (VFC0086)] [Escherichia coli O103:H2 str. 12009]																				1.00207
VFG035469(gb|WP_000377957) (aec31) type VI secretion system ImpA and VasL domain-containing protein [ACE T6SS (VF1122) - Effector delivery system (VFC0086)] [Escherichia coli O103:H2 str. 12009]																				0.998522
VFG041097(gb|NP_459270) (STM0273) type VI secretion system-associated protein [SCI (Salmonella centrisome island)/SPI-6 T6SS (VF0974) - Effector delivery system (VFC0086)] [Salmonella enterica subsp. enterica serovar Typhimurium str. LT2]																	1.0221
VFG049900 (tssM) Type VI secretion system protein TssM [T6SS (VF0579) - Effector delivery system (VFC0086)] [Shigella sonnei Ss046]																				1
VFG000477(gb|NP_461845) (rpoS) RNA polymerase sigma factor RpoS [RpoS (VF0112) - Regulation (VFC0301)] [Salmonella enterica subsp. enterica serovar Typhimurium str. LT2]				1
VFG012192(gb|WP_011010476) (virS) sensor histidine kinase [VirR/VirS two component system (VF0729) - Regulation (VFC0301)] [Clostridium perfringens str. 13]		1	1	1	1	1	1		1			1	1	1				1	1	1	1		1
VFG012193(gb|WP_011590863) (virS) ATP-binding protein [VirR/VirS two component system (VF0729) - Regulation (VFC0301)] [Clostridium perfringens ATCC 13124]	1							1		1	1				1	1	1					1
VFG012195(gb|WP_003449818) (virR) LytTR family DNA-binding domain-containing protein [VirR/VirS two component system (VF0729) - Regulation (VFC0301)] [Clostridium perfringens str. 13]	1	1	1		1	1	1		1	1	1	1	1	1		1	1	1		1	1		1
VFG012196(gb|WP_003449818) (virR) LytTR family DNA-binding domain-containing protein [VirR/VirS two component system (VF0729) - Regulation (VFC0301)] [Clostridium perfringens ATCC 13124]				1				1							1				1			1
VFG049013(gb|WP_004201684) (rcsB) transcriptional regulator RcsB [RcsAB (VF0571) - Regulation (VFC0301)] [Klebsiella pneumoniae 342]																0.996928
VFG032519(gb|WP_012986167) (bsh) bile salt hydrolase [BSH (VF0350) - Stress survival (VFC0282)] [Listeria seeligeri serovar 1/2b str. SLCC3954]					0.949898														0.965235
VFG002276(gb|WP_011009653) (colA) collagenase [Kappa-toxin (VF0388) - Exoenzyme (VFC0251)] [Clostridium perfringens str. 13]	1			1	1			1		1					1	1	1		1
VFG002277(gb|WP_011009663) (nagH) hyaluronidase [Mu-toxin (VF0389) - Exoenzyme (VFC0251)] [Clostridium perfringens str. 13]	1	1	1	1	1	1	1	1	1	1	0.981993	1	1	1	1	1	1	1	1	1	1		1
VFG002278(gb|WP_011010095) (nagI) hyaluronidase [Mu-toxin (VF0389) - Exoenzyme (VFC0251)] [Clostridium perfringens str. 13]	1	1		1	1	1	1	1.00231	1			1	1	1	1.00231		1	1	1.00231	1	1	0.99923	1
VFG002279(gb|WP_003467250) (nagJ) hyaluronidase [Mu-toxin (VF0389) - Exoenzyme (VFC0251)] [Clostridium perfringens str. 13]										1						1	1		1		1
VFG002280(gb|WP_011010361) (nagK) hyaluronidase [Mu-toxin (VF0389) - Exoenzyme (VFC0251)] [Clostridium perfringens str. 13]			1	1	1					1						1	1		1			1
VFG002281(gb|WP_003468301) (nagL) hyaluronidase [Mu-toxin (VF0389) - Exoenzyme (VFC0251)] [Clostridium perfringens str. 13]			1
VFG002282(gb|WP_041707714) (cloSI) alpha-clostripain [Alpha-clostripain (VF0390) - Exoenzyme (VFC0251)] [Clostridium perfringens str. 13]	1	1				1	1		1	1		1	1	1		1	1	1		1	1	1	1
VFG002283(gb|WP_011009995) (nanI) exo-alpha-sialidase [Sialidase (VF0391) - Exoenzyme (VFC0251)] [Clostridium perfringens str. 13]	1	1			1	1	1		1	1		1	1	1		1	1	1		1	1	1	1
VFG002284(gb|WP_011009886) (nanJ) exo-alpha-sialidase [Sialidase (VF0391) - Exoenzyme (VFC0251)] [Clostridium perfringens str. 13]		1	1	1		1	1		1			1	1	1				1	1	1	1		1
VFG002285(gb|WP_011590492) (nanH) sialidase [Sialidase (VF0391) - Exoenzyme (VFC0251)] [Clostridium perfringens ATCC 13124]	1	0.975631	1	1.01044											1		1
VFG012129(gb|WP_011590092) (colA) collagenase [Kappa-toxin (VF0388) - Exoenzyme (VFC0251)] [Clostridium perfringens ATCC 13124]											1.02383											1
VFG012130(gb|WP_011591315) (colA) collagenase [Kappa-toxin (VF0388) - Exoenzyme (VFC0251)] [Clostridium perfringens SM101]		1	1			1	1		1			1	1	1				1		1	1		1
VFG012133(gb|WP_011590096) (nagH) hyaluronidase [Mu-toxin (VF0389) - Exoenzyme (VFC0251)] [Clostridium perfringens ATCC 13124]																						1.00061
VFG012135(gb|WP_011590415) (nagI) hyaluronidase [Mu-toxin (VF0389) - Exoenzyme (VFC0251)] [Clostridium perfringens ATCC 13124]			1.00077							1.00077	1					1.00077
VFG012137(gb|WP_003456570) (nagJ) hyaluronidase [Mu-toxin (VF0389) - Exoenzyme (VFC0251)] [Clostridium perfringens ATCC 13124]	1	1	1	1	1	1	1	1	1			1	1	1	1			1		1		1	1
VFG012139(gb|WP_011590733) (nagK) hyaluronidase [Mu-toxin (VF0389) - Exoenzyme (VFC0251)] [Clostridium perfringens ATCC 13124]	0.997442							0.997442							0.997442
VFG012154(gb|WP_011590397) (cloSI) alpha-clostripain [Alpha-clostripain (VF0390) - Exoenzyme (VFC0251)] [Clostridium perfringens ATCC 13124]			1	1	1						1
VFG012155(gb|WP_011591889) (cloSI) alpha-clostripain [Alpha-clostripain (VF0390) - Exoenzyme (VFC0251)] [Clostridium perfringens SM101]								1							1				1
VFG012158(gb|WP_011591929) (nanH) sialidase [Sialidase (VF0391) - Exoenzyme (VFC0251)] [Clostridium perfringens SM101]		1			0.997389	1	1	1	1	1	1	1	1	1	1.01915	1		1	1	1	1	1	1
VFG012160(gb|WP_011590331) (nanI) exo-alpha-sialidase [Sialidase (VF0391) - Exoenzyme (VFC0251)] [Clostridium perfringens ATCC 13124]			1	1				1	1.02494						1				1
VFG012162(gb|WP_011590241) (nanJ) exo-alpha-sialidase [Sialidase (VF0391) - Exoenzyme (VFC0251)] [Clostridium perfringens ATCC 13124]	1				1			1		1					1	1	1					1
VFG000863(gb|BAA94855) (east1) heat-stable enterotoxin 1 [EAST1 (VF0216) - Exotoxin (VFC0235)] [Escherichia coli O44:H18 042]			0.991453
VFG002274(gb|WP_011009584) (plc) phospholipase C [Alpha-toxin (CpPLC) (VF0378) - Exotoxin (VFC0235)] [Clostridium perfringens str. 13]	1	1		1	1	1	1	1	1	1		1	1	1	1	1	1	1	1	1	1	1	1
VFG002275(gb|WP_003467630) (pfoA) perfringolysin O [Theta-toxin/PFO (VF0382) - Exotoxin (VFC0235)] [Clostridium perfringens str. 13]				1		1	1		1	1		1	1			1	1	1
VFG012120(gb|WP_011590041) (plc) phospholipase C [Alpha-toxin (CpPLC) (VF0378) - Exotoxin (VFC0235)] [Clostridium perfringens ATCC 13124]			1
VFG012121(gb|WP_011591220) (plc) phospholipase C [Alpha-toxin (CpPLC) (VF0378) - Exotoxin (VFC0235)] [Clostridium perfringens SM101]											1
VFG012122(gb|WP_010968250) (cpb2) beta2-toxin [Beta2-toxin (VF0417) - Exotoxin (VFC0235)] [Clostridium perfringens str. 13]		0.998747		0.998747		0.998747	0.998747		1			1	0.998747	0.998747				0.998747		1	0.998747	0.998747	1
VFG012125(gb|WP_003462918) (pfoA) perfringolysin O [Theta-toxin/PFO (VF0382) - Exotoxin (VFC0235)] [Clostridium perfringens ATCC 13124]	1	1	1		1			1			1			1	1				1	1	1	1	1

## Sheet: Table_S6
#FILE	Pathotype	SEQUENCE	START	END	STRAND	GENE	COVERAGE	COVERAGE_MAP	GAPS	%COVERAGE	%IDENTITY	DATABASE	ACCESSION	PRODUCT	RESISTANCE
DTU_2024_1035976_100_SI_DTU_88A_SE.fq.gz_flye.fasta	ETEC	DTU_2024_1035976_100_SI_DTU_88A_SE.fq.gz_flye_contig_10	10953	11634	-	IncFIB(AP001918)_1	1-682/682	===============	0/0	100	96.63	plasmidfinder	AP001918	IncFIB(AP001918)_1__AP001918
DTU_2024_1035976_100_SI_DTU_88A_SE.fq.gz_flye.fasta	ETEC	DTU_2024_1035976_100_SI_DTU_88A_SE.fq.gz_flye_contig_10	60683	61181	-	IncFIC(FII)_1	1-499/499	===============	0/0	100	98.6	plasmidfinder	AP001918	IncFIC(FII)_1__AP001918
DTU_2024_1035976_100_SI_DTU_88A_SE.fq.gz_flye.fasta		DTU_2024_1035976_100_SI_DTU_88A_SE.fq.gz_flye_contig_1	2157595	2158224	+	IncHI2A_1	1-630/630	===============	0/0	100	99.52	plasmidfinder	BX664015	IncHI2A_1__BX664015
DTU_2024_1035975_100_SI_DTU_83A_SE.fq.gz_flye.fasta	ETEC	DTU_2024_1035975_100_SI_DTU_83A_SE.fq.gz_flye_contig_15	29616	30297	-	IncFIB(AP001918)_1	1-682/682	===============	0/0	100	98.83	plasmidfinder	AP001918	IncFIB(AP001918)_1__AP001918
DTU_2024_1035975_100_SI_DTU_83A_SE.fq.gz_flye.fasta	ETEC	DTU_2024_1035975_100_SI_DTU_83A_SE.fq.gz_flye_contig_8	46229	46526	+	IncFIC(FII)_1	1-299/499	========/=.....	2025-03-03	59.52	93	plasmidfinder	AP001918	IncFIC(FII)_1__AP001918
DTU_2024_1035975_100_SI_DTU_83A_SE.fq.gz_flye.fasta		DTU_2024_1035975_100_SI_DTU_83A_SE.fq.gz_flye_contig_18	36349	36485	+	IncI_Gamma_1	5-141/141	===============	0/0	97.16	100	plasmidfinder	AP011954	IncI_Gamma_1_AP011954
DTU_2024_1035975_100_SI_DTU_83A_SE.fq.gz_flye.fasta		DTU_2024_1035975_100_SI_DTU_83A_SE.fq.gz_flye_contig_13	72894	73036	+	IncI1_1_Alpha	1-142/142	========/======	2025-01-01	100	98.6	plasmidfinder	AP005147	IncI1_1_Alpha_AP005147
DTU_2024_1035974_100_SI_DTU_82A_SE.fq.gz_flye.fasta	ETEC	DTU_2024_1035974_100_SI_DTU_82A_SE.fq.gz_flye_contig_8	64729	65410	-	IncFIB(AP001918)_1	1-682/682	===============	0/0	100	98.83	plasmidfinder	AP001918	IncFIB(AP001918)_1__AP001918
DTU_2024_1035974_100_SI_DTU_82A_SE.fq.gz_flye.fasta	ETEC	DTU_2024_1035974_100_SI_DTU_82A_SE.fq.gz_flye_contig_2	46228	46525	+	IncFIC(FII)_1	1-299/499	========/=.....	2025-03-03	59.52	93	plasmidfinder	AP001918	IncFIC(FII)_1__AP001918
DTU_2024_1035974_100_SI_DTU_82A_SE.fq.gz_flye.fasta		DTU_2024_1035974_100_SI_DTU_82A_SE.fq.gz_flye_contig_11	52689	52831	+	IncI_Gamma_1	1-141/141	========/======	2025-02-02	100	97.2	plasmidfinder	AP011954	IncI_Gamma_1_AP011954
DTU_2024_1035974_100_SI_DTU_82A_SE.fq.gz_flye.fasta		DTU_2024_1035974_100_SI_DTU_82A_SE.fq.gz_flye_contig_9	5280	5603	+	IncI2_1	1-324/324	===============	0/0	100	99.38	plasmidfinder	KP347127	IncI2_1__KP347127
DTU_2024_1035973_100_SI_DTU_80C_SE.fq.gz_flye.fasta	ETEC	DTU_2024_1035973_100_SI_DTU_80C_SE.fq.gz_flye_contig_10	42980	43276	-	IncFIC(FII)_1	1-299/499	========/=.....	2025-06-04	59.12	93.02	plasmidfinder	AP001918	IncFIC(FII)_1__AP001918
DTU_2024_1035973_100_SI_DTU_80C_SE.fq.gz_flye.fasta	ETEC	DTU_2024_1035973_100_SI_DTU_80C_SE.fq.gz_flye_contig_16	26464	27145	+	IncFIB(AP001918)_1	1-682/682	===============	0/0	100	98.83	plasmidfinder	AP001918	IncFIB(AP001918)_1__AP001918
DTU_2024_1035973_100_SI_DTU_80C_SE.fq.gz_flye.fasta	ETEC	DTU_2024_1035973_100_SI_DTU_80C_SE.fq.gz_flye_contig_17	9200	9498	-	IncFIC(FII)_1	1-299/499	=========......	0/0	59.92	91.64	plasmidfinder	AP001918	IncFIC(FII)_1__AP001918
DTU_2024_1035973_100_SI_DTU_80C_SE.fq.gz_flye.fasta		DTU_2024_1035973_100_SI_DTU_80C_SE.fq.gz_flye_contig_18	2823	3196	-	IncX1_1	1-374/374	===============	0/0	100	98.93	plasmidfinder	EU370913	IncX1_1__EU370913
DTU_2024_1035973_100_SI_DTU_80C_SE.fq.gz_flye.fasta		DTU_2024_1035973_100_SI_DTU_80C_SE.fq.gz_flye_contig_5	28969	29110	-	IncI1_1_Alpha	1-142/142	===============	0/0	100	100	plasmidfinder	AP005147	IncI1_1_Alpha_AP005147
DTU_2024_1035972_100_SI_DTU_79A_SE.fq.gz_flye.fasta	ETEC	DTU_2024_1035972_100_SI_DTU_79A_SE.fq.gz_flye_contig_17	4860	5541	-	IncFIB(AP001918)_1	1-682/682	===============	0/0	100	97.21	plasmidfinder	AP001918	IncFIB(AP001918)_1__AP001918
DTU_2024_1035972_100_SI_DTU_79A_SE.fq.gz_flye.fasta		DTU_2024_1035972_100_SI_DTU_79A_SE.fq.gz_flye_contig_17	67256	67515	+	IncFII(pHN7A8)_1_pHN7A8	1-260/260	===============	0/0	100	98.08	plasmidfinder	JN232517	IncFII(pHN7A8)_1_pHN7A8_JN232517
DTU_2024_1035972_100_SI_DTU_79A_SE.fq.gz_flye.fasta		DTU_2024_1035972_100_SI_DTU_79A_SE.fq.gz_flye_contig_2	51476	52181	+	pEC4115_1	1-706/706	===============	0/0	100	99.43	plasmidfinder	NC_011351	pEC4115_1__NC_011351
DTU_2024_1035972_100_SI_DTU_79A_SE.fq.gz_flye.fasta		DTU_2024_1035972_100_SI_DTU_79A_SE.fq.gz_flye_contig_20	2396	2526	-	ColRNAI_1	1-130/130	========/======	2025-01-01	100	90.08	plasmidfinder	DQ298019	ColRNAI_1__DQ298019
DTU_2024_1035971_100_SI_DTU_76C_SE.fq.gz_flye.fasta	ETEC	DTU_2024_1035971_100_SI_DTU_76C_SE.fq.gz_flye_contig_13	3399	4080	+	IncFIB(AP001918)_1	1-682/682	===============	0/0	100	98.83	plasmidfinder	AP001918	IncFIB(AP001918)_1__AP001918
DTU_2024_1035971_100_SI_DTU_76C_SE.fq.gz_flye.fasta	ETEC	DTU_2024_1035971_100_SI_DTU_76C_SE.fq.gz_flye_contig_19	29762	30060	+	IncFIC(FII)_1	1-299/499	=========......	0/0	59.92	91.64	plasmidfinder	AP001918	IncFIC(FII)_1__AP001918
DTU_2024_1035971_100_SI_DTU_76C_SE.fq.gz_flye.fasta		DTU_2024_1035971_100_SI_DTU_76C_SE.fq.gz_flye_contig_33	12122	12443	+	IncI2_1_Delta	1-316/316	========/======	2025-06-01	100	97.52	plasmidfinder	AP002527	IncI2_1_Delta_AP002527
DTU_2024_1035971_100_SI_DTU_76C_SE.fq.gz_flye.fasta		DTU_2024_1035971_100_SI_DTU_76C_SE.fq.gz_flye_contig_41	66822	66958	-	IncI_Gamma_1	5-141/141	===============	0/0	97.16	100	plasmidfinder	AP011954	IncI_Gamma_1_AP011954
DTU_2024_1035971_100_SI_DTU_76C_SE.fq.gz_flye.fasta		DTU_2024_1035971_100_SI_DTU_76C_SE.fq.gz_flye_contig_42	2972	3485	+	IncN_1	1-514/514	===============	0/0	100	100	plasmidfinder	AY046276	IncN_1__AY046276
DTU_2024_1035971_100_SI_DTU_76C_SE.fq.gz_flye.fasta		DTU_2024_1035971_100_SI_DTU_76C_SE.fq.gz_flye_contig_42	32895	33280	+	IncFIA(HI1)_1_HI1	1-386/388	===============	0/0	99.48	93.78	plasmidfinder	AF250878	IncFIA(HI1)_1_HI1_AF250878
DTU_2024_1035971_100_SI_DTU_76C_SE.fq.gz_flye.fasta		DTU_2024_1035971_100_SI_DTU_76C_SE.fq.gz_flye_contig_42	52717	52976	+	IncFII(pHN7A8)_1_pHN7A8	1-260/260	===============	0/0	100	98.08	plasmidfinder	JN232517	IncFII(pHN7A8)_1_pHN7A8_JN232517
DTU_2024_1035970_100_SI_DTU_60C_SE.fq.gz_flye.fasta	ETEC	DTU_2024_1035970_100_SI_DTU_60C_SE.fq.gz_flye_contig_24	14895	15193	-	IncFIC(FII)_1	1-299/499	=========......	0/0	59.92	91.64	plasmidfinder	AP001918	IncFIC(FII)_1__AP001918
DTU_2024_1035970_100_SI_DTU_60C_SE.fq.gz_flye.fasta		DTU_2024_1035970_100_SI_DTU_60C_SE.fq.gz_flye_contig_9	7069	7384	+	IncI2_1_Delta	1-316/316	===============	0/0	100	98.1	plasmidfinder	AP002527	IncI2_1_Delta_AP002527
DTU_2024_1035970_100_SI_DTU_60C_SE.fq.gz_flye.fasta		DTU_2024_1035970_100_SI_DTU_60C_SE.fq.gz_flye_contig_24	60634	60832	-	IncX1_1	1-199/374	========.......	0/0	53.21	99.5	plasmidfinder	EU370913	IncX1_1__EU370913
DTU_2024_1035970_100_SI_DTU_60C_SE.fq.gz_flye.fasta		DTU_2024_1035970_100_SI_DTU_60C_SE.fq.gz_flye_contig_15	66368	67132	-	IncY_1	1-765/765	===============	0/0	100	99.22	plasmidfinder	K02380	IncY_1__K02380
DTU_2024_1035969_100_SI_DTU_56B_SE.fq.gz_flye.fasta	ETEC	DTU_2024_1035969_100_SI_DTU_56B_SE.fq.gz_flye_contig_25	87258	87939	-	IncFIB(AP001918)_1	1-682/682	===============	0/0	100	99.27	plasmidfinder	AP001918	IncFIB(AP001918)_1__AP001918
DTU_2024_1035969_100_SI_DTU_56B_SE.fq.gz_flye.fasta	ETEC	DTU_2024_1035969_100_SI_DTU_56B_SE.fq.gz_flye_contig_24	44255	44551	-	IncFIC(FII)_1	1-299/499	========/=.....	2025-06-04	59.12	93.36	plasmidfinder	AP001918	IncFIC(FII)_1__AP001918
DTU_2024_1035969_100_SI_DTU_56B_SE.fq.gz_flye.fasta		DTU_2024_1035969_100_SI_DTU_56B_SE.fq.gz_flye_contig_26	32974	33115	-	IncI1_1_Alpha	1-142/142	===============	0/0	100	100	plasmidfinder	AP005147	IncI1_1_Alpha_AP005147
DTU_2024_1035969_100_SI_DTU_56B_SE.fq.gz_flye.fasta		DTU_2024_1035969_100_SI_DTU_56B_SE.fq.gz_flye_contig_25	47360	47683	+	IncI2_1	1-324/324	===============	0/0	100	99.38	plasmidfinder	KP347127	IncI2_1__KP347127
DTU_2024_1035969_100_SI_DTU_56B_SE.fq.gz_flye.fasta		DTU_2024_1035969_100_SI_DTU_56B_SE.fq.gz_flye_contig_24	88446	88819	-	IncX1_1	1-374/374	===============	0/0	100	98.66	plasmidfinder	EU370913	IncX1_1__EU370913
DTU_2024_1035969_100_SI_DTU_56B_SE.fq.gz_flye.fasta		DTU_2024_1035969_100_SI_DTU_56B_SE.fq.gz_flye_contig_17	1877	2641	+	IncY_1	1-765/765	===============	0/0	100	99.48	plasmidfinder	K02380	IncY_1__K02380
DTU_2024_1035969_100_SI_DTU_56B_SE.fq.gz_flye.fasta		DTU_2024_1035969_100_SI_DTU_56B_SE.fq.gz_flye_contig_28	29556	30151	-	RepA_1_pKPC-CAV1321	1-596/596	===============	0/0	100	100	plasmidfinder	CP011611	RepA_1_pKPC-CAV1321_CP011611
DTU_2024_1035969_100_SI_DTU_56B_SE.fq.gz_flye.fasta		DTU_2024_1035969_100_SI_DTU_56B_SE.fq.gz_flye_contig_28	50870	51398	-	IncQ1_1	1-529/796	==========.....	0/0	66.46	100	plasmidfinder	M28829.1	IncQ1_1__M28829.1
DTU_2024_1035968_100_SI_DTU_52A_SE.fq.gz_flye.fasta	ETEC	DTU_2024_1035968_100_SI_DTU_52A_SE.fq.gz_flye_contig_20	87667	88348	-	IncFIB(AP001918)_1	1-682/682	===============	0/0	100	99.27	plasmidfinder	AP001918	IncFIB(AP001918)_1__AP001918
DTU_2024_1035968_100_SI_DTU_52A_SE.fq.gz_flye.fasta	ETEC	DTU_2024_1035968_100_SI_DTU_52A_SE.fq.gz_flye_contig_2	874867	875163	+	IncFIC(FII)_1	1-299/499	========/=.....	2025-06-04	59.12	93.36	plasmidfinder	AP001918	IncFIC(FII)_1__AP001918
DTU_2024_1035968_100_SI_DTU_52A_SE.fq.gz_flye.fasta		DTU_2024_1035968_100_SI_DTU_52A_SE.fq.gz_flye_contig_31	38345	38486	-	IncI1_1_Alpha	1-142/142	===============	0/0	100	100	plasmidfinder	AP005147	IncI1_1_Alpha_AP005147
DTU_2024_1035968_100_SI_DTU_52A_SE.fq.gz_flye.fasta		DTU_2024_1035968_100_SI_DTU_52A_SE.fq.gz_flye_contig_20	47769	48092	+	IncI2_1	1-324/324	===============	0/0	100	99.38	plasmidfinder	KP347127	IncI2_1__KP347127
DTU_2024_1035968_100_SI_DTU_52A_SE.fq.gz_flye.fasta		DTU_2024_1035968_100_SI_DTU_52A_SE.fq.gz_flye_contig_36	108204	108732	-	IncQ1_1	1-529/796	==========.....	0/0	66.46	100	plasmidfinder	M28829.1	IncQ1_1__M28829.1
DTU_2024_1035968_100_SI_DTU_52A_SE.fq.gz_flye.fasta		DTU_2024_1035968_100_SI_DTU_52A_SE.fq.gz_flye_contig_2	830599	830972	+	IncX1_1	1-374/374	===============	0/0	100	98.66	plasmidfinder	EU370913	IncX1_1__EU370913
DTU_2024_1035968_100_SI_DTU_52A_SE.fq.gz_flye.fasta		DTU_2024_1035968_100_SI_DTU_52A_SE.fq.gz_flye_contig_32	24184	24948	-	IncY_1	1-765/765	===============	0/0	100	99.48	plasmidfinder	K02380	IncY_1__K02380
DTU_2024_1035968_100_SI_DTU_52A_SE.fq.gz_flye.fasta		DTU_2024_1035968_100_SI_DTU_52A_SE.fq.gz_flye_contig_36	86889	87484	-	RepA_1_pKPC-CAV1321	1-596/596	===============	0/0	100	100	plasmidfinder	CP011611	RepA_1_pKPC-CAV1321_CP011611
DTU_2024_1035967_100_SI_DTU_48A_SE.fq.gz_flye.fasta	ETEC	DTU_2024_1035967_100_SI_DTU_48A_SE.fq.gz_flye_contig_2	39810	40491	+	IncFIB(AP001918)_1	1-682/682	===============	0/0	100	98.83	plasmidfinder	AP001918	IncFIB(AP001918)_1__AP001918
DTU_2024_1035967_100_SI_DTU_48A_SE.fq.gz_flye.fasta	ETEC	DTU_2024_1035967_100_SI_DTU_48A_SE.fq.gz_flye_contig_5	3999	4297	+	IncFIC(FII)_1	1-299/499	=========......	0/0	59.92	91.64	plasmidfinder	AP001918	IncFIC(FII)_1__AP001918
DTU_2024_1035967_100_SI_DTU_48A_SE.fq.gz_flye.fasta		DTU_2024_1035967_100_SI_DTU_48A_SE.fq.gz_flye_contig_16	207441	207767	-	IncHI2_1	1-327/327	===============	0/0	100	100	plasmidfinder	BX664015	IncHI2_1__BX664015
DTU_2024_1035967_100_SI_DTU_48A_SE.fq.gz_flye.fasta		DTU_2024_1035967_100_SI_DTU_48A_SE.fq.gz_flye_contig_16	222633	223262	+	IncHI2A_1	1-630/630	===============	0/0	100	100	plasmidfinder	BX664015	IncHI2A_1__BX664015
DTU_2024_1035967_100_SI_DTU_48A_SE.fq.gz_flye.fasta		DTU_2024_1035967_100_SI_DTU_48A_SE.fq.gz_flye_contig_26	6404	6545	-	IncI1_1_Alpha	1-142/142	===============	0/0	100	100	plasmidfinder	AP005147	IncI1_1_Alpha_AP005147
DTU_2024_1035967_100_SI_DTU_48A_SE.fq.gz_flye.fasta		DTU_2024_1035967_100_SI_DTU_48A_SE.fq.gz_flye_contig_29	29522	30035	+	IncN_1	1-514/514	===============	0/0	100	100	plasmidfinder	AY046276	IncN_1__AY046276
DTU_2024_1035967_100_SI_DTU_48A_SE.fq.gz_flye.fasta		DTU_2024_1035967_100_SI_DTU_48A_SE.fq.gz_flye_contig_29	49531	49904	-	IncX1_1	1-374/374	===============	0/0	100	98.93	plasmidfinder	EU370913	IncX1_1__EU370913
DTU_2024_1035966_100_SI_DTU_42C_SE.fq.gz_flye.fasta	ETEC	DTU_2024_1035966_100_SI_DTU_42C_SE.fq.gz_flye_contig_27	1679	2177	+	IncFIC(FII)_1	1-499/499	===============	0/0	100	98.6	plasmidfinder	AP001918	IncFIC(FII)_1__AP001918
DTU_2024_1035966_100_SI_DTU_42C_SE.fq.gz_flye.fasta	ETEC	DTU_2024_1035966_100_SI_DTU_42C_SE.fq.gz_flye_contig_38	6579	7260	+	IncFIB(AP001918)_1	1-682/682	===============	0/0	100	96.63	plasmidfinder	AP001918	IncFIB(AP001918)_1__AP001918
DTU_2024_1035966_100_SI_DTU_42C_SE.fq.gz_flye.fasta		DTU_2024_1035966_100_SI_DTU_42C_SE.fq.gz_flye_contig_39	64489	64630	+	IncI1_1_Alpha	1-142/142	===============	0/0	100	100	plasmidfinder	AP005147	IncI1_1_Alpha_AP005147
DTU_2024_1035966_100_SI_DTU_42C_SE.fq.gz_flye.fasta		DTU_2024_1035966_100_SI_DTU_42C_SE.fq.gz_flye_contig_5	40801	41062	-	IncFII(pCoo)_1_pCoo	1-262/262	===============	0/0	100	97.71	plasmidfinder	CR942285	IncFII(pCoo)_1_pCoo_CR942285
DTU_2024_1035966_100_SI_DTU_42C_SE.fq.gz_flye.fasta		DTU_2024_1035966_100_SI_DTU_42C_SE.fq.gz_flye_contig_64	6006	6115	-	Col440I_1	1-110/114	===============	0/0	96.49	90	plasmidfinder	CP023920.1	Col440I_1__CP023920.1
DTU_2024_1035966_100_SI_DTU_42C_SE.fq.gz_flye.fasta		DTU_2024_1035966_100_SI_DTU_42C_SE.fq.gz_flye_contig_84	41256	41961	-	pEC4115_1	1-706/706	===============	0/0	100	99.43	plasmidfinder	NC_011351	pEC4115_1__NC_011351
DTU_2024_1035965_100_SI_LVK_103_SE.fq.gz_flye.fasta	ETEC	DTU_2024_1035965_100_SI_LVK_103_SE.fq.gz_flye_contig_9	55216	55897	+	IncFIB(AP001918)_1	1-682/682	===============	0/0	100	99.12	plasmidfinder	AP001918	IncFIB(AP001918)_1__AP001918
DTU_2024_1035965_100_SI_LVK_103_SE.fq.gz_flye.fasta	ETEC	DTU_2024_1035965_100_SI_LVK_103_SE.fq.gz_flye_contig_9	72331	72825	+	IncFIC(FII)_1	1-499/499	========/======	2025-06-03	99	95.4	plasmidfinder	AP001918	IncFIC(FII)_1__AP001918
DTU_2024_1035965_100_SI_LVK_103_SE.fq.gz_flye.fasta		DTU_2024_1035965_100_SI_LVK_103_SE.fq.gz_flye_contig_12	15987	16360	+	IncX1_1	1-374/374	===============	0/0	100	98.66	plasmidfinder	EU370913	IncX1_1__EU370913
DTU_2024_1035964_100_SI_LVK_102_SE.fq.gz_flye.fasta	ETEC	DTU_2024_1035964_100_SI_LVK_102_SE.fq.gz_flye_contig_3	5863	6361	+	IncFIC(FII)_1	1-499/499	===============	0/0	100	98.6	plasmidfinder	AP001918	IncFIC(FII)_1__AP001918
DTU_2024_1035964_100_SI_LVK_102_SE.fq.gz_flye.fasta	ETEC	DTU_2024_1035964_100_SI_LVK_102_SE.fq.gz_flye_contig_3	53707	54388	+	IncFIB(AP001918)_1	1-682/682	===============	0/0	100	96.63	plasmidfinder	AP001918	IncFIB(AP001918)_1__AP001918
DTU_2024_1035964_100_SI_LVK_102_SE.fq.gz_flye.fasta		DTU_2024_1035964_100_SI_LVK_102_SE.fq.gz_flye_contig_15	535680	536564	-	p0111_1	1-885/885	===============	0/0	100	98.87	plasmidfinder	AP010962	p0111_1__AP010962
DTU_2024_1035964_100_SI_LVK_102_SE.fq.gz_flye.fasta		DTU_2024_1035964_100_SI_LVK_102_SE.fq.gz_flye_contig_8	11908	12613	-	pEC4115_1	1-706/706	===============	0/0	100	99.43	plasmidfinder	NC_011351	pEC4115_1__NC_011351
DTU_2024_1035964_100_SI_LVK_102_SE.fq.gz_flye.fasta		DTU_2024_1035964_100_SI_LVK_102_SE.fq.gz_flye_contig_9	110417	111046	-	IncHI2A_1	1-630/630	===============	0/0	100	100	plasmidfinder	BX664015	IncHI2A_1__BX664015
DTU_2024_1035964_100_SI_LVK_102_SE.fq.gz_flye.fasta		DTU_2024_1035964_100_SI_LVK_102_SE.fq.gz_flye_contig_9	127225	127551	+	IncHI2_1	1-327/327	===============	0/0	100	100	plasmidfinder	BX664015	IncHI2_1__BX664015
DTU_2024_1035963_100_SI_LVK_98_SE.fq.gz_flye.fasta	ETEC	DTU_2024_1035963_100_SI_LVK_98_SE.fq.gz_flye_contig_38	22272	22953	-	IncFIB(AP001918)_1	1-682/682	===============	0/0	100	97.07	plasmidfinder	AP001918	IncFIB(AP001918)_1__AP001918
DTU_2024_1035963_100_SI_LVK_98_SE.fq.gz_flye.fasta		DTU_2024_1035963_100_SI_LVK_98_SE.fq.gz_flye_contig_17	25348	25606	+	IncFII(29)_1_pUTI89	1-259/259	===============	0/0	100	100	plasmidfinder	CP003035	IncFII(29)_1_pUTI89_CP003035
DTU_2024_1035963_100_SI_LVK_98_SE.fq.gz_flye.fasta		DTU_2024_1035963_100_SI_LVK_98_SE.fq.gz_flye_contig_6	53485	53621	+	IncI_Gamma_1	5-141/141	===============	0/0	97.16	100	plasmidfinder	AP011954	IncI_Gamma_1_AP011954
DTU_2024_1035962_100_SI_LVK_97_SE.fq.gz_flye.fasta	ETEC	DTU_2024_1035962_100_SI_LVK_97_SE.fq.gz_flye_contig_21	7535	7832	+	IncFIC(FII)_1	1-299/499	========/=.....	2025-03-03	59.52	93	plasmidfinder	AP001918	IncFIC(FII)_1__AP001918
DTU_2024_1035962_100_SI_LVK_97_SE.fq.gz_flye.fasta	ETEC	DTU_2024_1035962_100_SI_LVK_97_SE.fq.gz_flye_contig_4	4592	5273	+	IncFIB(AP001918)_1	1-682/682	===============	0/0	100	99.27	plasmidfinder	AP001918	IncFIB(AP001918)_1__AP001918
DTU_2024_1035962_100_SI_LVK_97_SE.fq.gz_flye.fasta	ETEC	DTU_2024_1035962_100_SI_LVK_97_SE.fq.gz_flye_contig_5	15953	16451	+	IncFIC(FII)_1	1-499/499	===============	0/0	100	98.6	plasmidfinder	AP001918	IncFIC(FII)_1__AP001918
DTU_2024_1035962_100_SI_LVK_97_SE.fq.gz_flye.fasta		DTU_2024_1035962_100_SI_LVK_97_SE.fq.gz_flye_contig_28	33266	33391	+	IncI1_1_Alpha	13-138/142	.=======/======	2025-02-02	88.03	92.13	plasmidfinder	AP005147	IncI1_1_Alpha_AP005147
DTU_2024_1035962_100_SI_LVK_97_SE.fq.gz_flye.fasta		DTU_2024_1035962_100_SI_LVK_97_SE.fq.gz_flye_contig_43	31677	31818	-	IncI1_1_Alpha	1-142/142	===============	0/0	100	99.3	plasmidfinder	AP005147	IncI1_1_Alpha_AP005147
DTU_2024_1035962_100_SI_LVK_97_SE.fq.gz_flye.fasta		DTU_2024_1035962_100_SI_LVK_97_SE.fq.gz_flye_contig_45	11926	12241	+	IncI2_1_Delta	1-316/316	===============	0/0	100	98.1	plasmidfinder	AP002527	IncI2_1_Delta_AP002527
DTU_2024_1035962_100_SI_LVK_97_SE.fq.gz_flye.fasta		DTU_2024_1035962_100_SI_LVK_97_SE.fq.gz_flye_contig_9	84291	85175	+	p0111_1	1-885/885	===============	0/0	100	98.87	plasmidfinder	AP010962	p0111_1__AP010962
DTU_2024_1035961_100_SI_LVK_94_SE.fq.gz_flye.fasta	ETEC	DTU_2024_1035961_100_SI_LVK_94_SE.fq.gz_flye_contig_13	16550	17231	-	IncFIB(AP001918)_1	1-682/682	===============	0/0	100	99.27	plasmidfinder	AP001918	IncFIB(AP001918)_1__AP001918
DTU_2024_1035961_100_SI_LVK_94_SE.fq.gz_flye.fasta		DTU_2024_1035961_100_SI_LVK_94_SE.fq.gz_flye_contig_12	19629	19889	-	IncFII_1	1-261/261	===============	0/0	100	100	plasmidfinder	AY458016	IncFII_1__AY458016
DTU_2024_1035961_100_SI_LVK_94_SE.fq.gz_flye.fasta		DTU_2024_1035961_100_SI_LVK_94_SE.fq.gz_flye_contig_14	4733	5106	-	IncX1_1	1-374/374	===============	0/0	100	98.66	plasmidfinder	EU370913	IncX1_1__EU370913
DTU_2024_1035961_100_SI_LVK_94_SE.fq.gz_flye.fasta		DTU_2024_1035961_100_SI_LVK_94_SE.fq.gz_flye_contig_25	77462	77603	+	IncI1_1_Alpha	1-142/142	===============	0/0	100	100	plasmidfinder	AP005147	IncI1_1_Alpha_AP005147
DTU_2024_1035961_100_SI_LVK_94_SE.fq.gz_flye.fasta		DTU_2024_1035961_100_SI_LVK_94_SE.fq.gz_flye_contig_29	63625	64509	+	p0111_1	1-885/885	===============	0/0	100	99.21	plasmidfinder	AP010962	p0111_1__AP010962
DTU_2024_1035961_100_SI_LVK_94_SE.fq.gz_flye.fasta		DTU_2024_1035961_100_SI_LVK_94_SE.fq.gz_flye_contig_34	35794	35919	-	IncI1_1_Alpha	13-138/142	.=======/======	2025-02-02	88.03	92.13	plasmidfinder	AP005147	IncI1_1_Alpha_AP005147
DTU_2024_1035961_100_SI_LVK_94_SE.fq.gz_flye.fasta		DTU_2024_1035961_100_SI_LVK_94_SE.fq.gz_flye_contig_37	17165	17428	-	IncFII(pSE11)_1_pSE11	1-264/264	===============	0/0	100	98.48	plasmidfinder	AP009242	IncFII(pSE11)_1_pSE11_AP009242
DTU_2024_1035961_100_SI_LVK_94_SE.fq.gz_flye.fasta		DTU_2024_1035961_100_SI_LVK_94_SE.fq.gz_flye_contig_6	10922	11309	-	IncFIA_1	1-388/388	===============	0/0	100	99.74	plasmidfinder	AP001918	IncFIA_1__AP001918
DTU_2024_1035960_100_SI_LVK_83_SE.fq.gz_flye.fasta	ETEC	DTU_2024_1035960_100_SI_LVK_83_SE.fq.gz_flye_contig_11	34475	35156	+	IncFIB(AP001918)_1	1-682/682	===============	0/0	100	98.83	plasmidfinder	AP001918	IncFIB(AP001918)_1__AP001918
DTU_2024_1035960_100_SI_LVK_83_SE.fq.gz_flye.fasta	ETEC	DTU_2024_1035960_100_SI_LVK_83_SE.fq.gz_flye_contig_7	51908	52205	-	IncFIC(FII)_1	1-299/499	========/=.....	2025-03-03	59.52	93	plasmidfinder	AP001918	IncFIC(FII)_1__AP001918
DTU_2024_1035960_100_SI_LVK_83_SE.fq.gz_flye.fasta		DTU_2024_1035960_100_SI_LVK_83_SE.fq.gz_flye_contig_10	11220	11356	-	IncI_Gamma_1	5-141/141	===============	0/0	97.16	100	plasmidfinder	AP011954	IncI_Gamma_1_AP011954
DTU_2024_1035960_100_SI_LVK_83_SE.fq.gz_flye.fasta		DTU_2024_1035960_100_SI_LVK_83_SE.fq.gz_flye_contig_4	62783	62919	-	IncI_Gamma_1	5-141/141	===============	0/0	97.16	100	plasmidfinder	AP011954	IncI_Gamma_1_AP011954
DTU_2024_1035960_100_SI_LVK_83_SE.fq.gz_flye.fasta		DTU_2024_1035960_100_SI_LVK_83_SE.fq.gz_flye_contig_6	3195	3336	+	IncI1_1_Alpha	1-142/142	===============	0/0	100	99.3	plasmidfinder	AP005147	IncI1_1_Alpha_AP005147
DTU_2024_1035960_100_SI_LVK_83_SE.fq.gz_flye.fasta		DTU_2024_1035960_100_SI_LVK_83_SE.fq.gz_flye_contig_18	12808	13131	+	IncI2_1	1-324/324	===============	0/0	100	99.38	plasmidfinder	KP347127	IncI2_1__KP347127
DTU_2024_1035959_100_SI_LVK_80_SE.fq.gz_flye.fasta	ETEC	DTU_2024_1035959_100_SI_LVK_80_SE.fq.gz_flye_contig_25	18176	18857	+	IncFIB(AP001918)_1	1-682/682	===============	0/0	100	99.27	plasmidfinder	AP001918	IncFIB(AP001918)_1__AP001918
DTU_2024_1035959_100_SI_LVK_80_SE.fq.gz_flye.fasta	ETEC	DTU_2024_1035959_100_SI_LVK_80_SE.fq.gz_flye_contig_32	10112	10610	-	IncFIC(FII)_1	1-499/499	===============	0/0	100	98.6	plasmidfinder	AP001918	IncFIC(FII)_1__AP001918
DTU_2024_1035959_100_SI_LVK_80_SE.fq.gz_flye.fasta		DTU_2024_1035959_100_SI_LVK_80_SE.fq.gz_flye_contig_12	52042	52183	+	IncI1_1_Alpha	1-142/142	===============	0/0	100	99.3	plasmidfinder	AP005147	IncI1_1_Alpha_AP005147
DTU_2024_1035959_100_SI_LVK_80_SE.fq.gz_flye.fasta		DTU_2024_1035959_100_SI_LVK_80_SE.fq.gz_flye_contig_25	64620	64993	+	IncX1_1	1-374/374	===============	0/0	100	98.66	plasmidfinder	EU370913	IncX1_1__EU370913
DTU_2024_1035959_100_SI_LVK_80_SE.fq.gz_flye.fasta		DTU_2024_1035959_100_SI_LVK_80_SE.fq.gz_flye_contig_26	29781	30545	-	IncY_1	1-765/765	===============	0/0	100	99.87	plasmidfinder	K02380	IncY_1__K02380
DTU_2024_1035959_100_SI_LVK_80_SE.fq.gz_flye.fasta		DTU_2024_1035959_100_SI_LVK_80_SE.fq.gz_flye_contig_28	4132	4447	-	IncI2_1_Delta	1-316/316	===============	0/0	100	98.1	plasmidfinder	AP002527	IncI2_1_Delta_AP002527
DTU_2024_1035958_100_SI_LVK_74_SE.fq.gz_flye.fasta	ETEC	DTU_2024_1035958_100_SI_LVK_74_SE.fq.gz_flye_contig_36	6751	7432	-	IncFIB(AP001918)_1	1-682/682	===============	0/0	100	96.63	plasmidfinder	AP001918	IncFIB(AP001918)_1__AP001918
DTU_2024_1035958_100_SI_LVK_74_SE.fq.gz_flye.fasta	ETEC	DTU_2024_1035958_100_SI_LVK_74_SE.fq.gz_flye_contig_36	81427	81925	-	IncFIC(FII)_1	1-499/499	===============	0/0	100	98.4	plasmidfinder	AP001918	IncFIC(FII)_1__AP001918
DTU_2024_1035958_100_SI_LVK_74_SE.fq.gz_flye.fasta		DTU_2024_1035958_100_SI_LVK_74_SE.fq.gz_flye_contig_31	34361	34734	+	IncX1_1	1-374/374	===============	0/0	100	98.93	plasmidfinder	EU370913	IncX1_1__EU370913
DTU_2024_1035958_100_SI_LVK_74_SE.fq.gz_flye.fasta		DTU_2024_1035958_100_SI_LVK_74_SE.fq.gz_flye_contig_4	178275	178601	+	IncHI2_1	1-327/327	===============	0/0	100	100	plasmidfinder	BX664015	IncHI2_1__BX664015
DTU_2024_1035958_100_SI_LVK_74_SE.fq.gz_flye.fasta		DTU_2024_1035958_100_SI_LVK_74_SE.fq.gz_flye_contig_4	227467	228096	+	IncHI2A_1	1-630/630	===============	0/0	100	99.52	plasmidfinder	BX664015	IncHI2A_1__BX664015
DTU_2024_1035957_100_SI_LVK_61_SE.fq.gz_flye.fasta	ETEC	DTU_2024_1035957_100_SI_LVK_61_SE.fq.gz_flye_contig_17	46755	47436	+	IncFIB(AP001918)_1	1-682/682	===============	0/0	100	98.83	plasmidfinder	AP001918	IncFIB(AP001918)_1__AP001918
DTU_2024_1035957_100_SI_LVK_61_SE.fq.gz_flye.fasta	ETEC	DTU_2024_1035957_100_SI_LVK_61_SE.fq.gz_flye_contig_17	108218	108714	+	IncFIC(FII)_1	1-499/499	========/======	2025-02-01	99.6	95.59	plasmidfinder	AP001918	IncFIC(FII)_1__AP001918
DTU_2024_1035957_100_SI_LVK_61_SE.fq.gz_flye.fasta		DTU_2024_1035957_100_SI_LVK_61_SE.fq.gz_flye_contig_15	45162	45303	+	IncI1_1_Alpha	1-142/142	===============	0/0	100	100	plasmidfinder	AP005147	IncI1_1_Alpha_AP005147
DTU_2024_1035957_100_SI_LVK_61_SE.fq.gz_flye.fasta		DTU_2024_1035957_100_SI_LVK_61_SE.fq.gz_flye_contig_15	66343	66871	+	IncQ1_1	1-529/796	==========.....	0/0	66.46	100	plasmidfinder	M28829.1	IncQ1_1__M28829.1
DTU_2024_1035957_100_SI_LVK_61_SE.fq.gz_flye.fasta		DTU_2024_1035957_100_SI_LVK_61_SE.fq.gz_flye_contig_16	13812	14072	+	IncFII_1	1-261/261	===============	0/0	100	100	plasmidfinder	AY458016	IncFII_1__AY458016
DTU_2024_1035956_100_SI_LVK_60_SE.fq.gz_flye.fasta	ETEC	DTU_2024_1035956_100_SI_LVK_60_SE.fq.gz_flye_contig_30	2768	3066	-	IncFIC(FII)_1	1-299/499	=========......	0/0	59.92	91.64	plasmidfinder	AP001918	IncFIC(FII)_1__AP001918
DTU_2024_1035956_100_SI_LVK_60_SE.fq.gz_flye.fasta	ETEC	DTU_2024_1035956_100_SI_LVK_60_SE.fq.gz_flye_contig_9	6408	6703	+	IncFIC(FII)_1	1-297/499	========/=.....	2025-05-04	58.92	91.64	plasmidfinder	AP001918	IncFIC(FII)_1__AP001918
DTU_2024_1035956_100_SI_LVK_60_SE.fq.gz_flye.fasta		DTU_2024_1035956_100_SI_LVK_60_SE.fq.gz_flye_contig_43	55722	56037	+	IncI2_1_Delta	1-316/316	===============	0/0	100	98.1	plasmidfinder	AP002527	IncI2_1_Delta_AP002527
DTU_2024_1035956_100_SI_LVK_60_SE.fq.gz_flye.fasta		DTU_2024_1035956_100_SI_LVK_60_SE.fq.gz_flye_contig_29	3794	3992	+	IncX1_1	1-199/374	========.......	0/0	53.21	99.5	plasmidfinder	EU370913	IncX1_1__EU370913
DTU_2024_1035956_100_SI_LVK_60_SE.fq.gz_flye.fasta		DTU_2024_1035956_100_SI_LVK_60_SE.fq.gz_flye_contig_41	29087	29851	-	IncY_1	1-765/765	===============	0/0	100	99.22	plasmidfinder	K02380	IncY_1__K02380
DTU_2024_1035955_100_SI_LVK_48_SE.fq.gz_flye.fasta	ETEC	DTU_2024_1035955_100_SI_LVK_48_SE.fq.gz_flye_contig_12	72240	72539	+	IncFIC(FII)_1	1-299/499	========/=.....	2025-01-01	59.92	91.33	plasmidfinder	AP001918	IncFIC(FII)_1__AP001918
DTU_2024_1035955_100_SI_LVK_48_SE.fq.gz_flye.fasta	ETEC	DTU_2024_1035955_100_SI_LVK_48_SE.fq.gz_flye_contig_13	1896	2392	-	IncFIC(FII)_1	1-499/499	========/======	2025-02-01	99.6	93.59	plasmidfinder	AP001918	IncFIC(FII)_1__AP001918
DTU_2024_1035955_100_SI_LVK_48_SE.fq.gz_flye.fasta	ETEC	DTU_2024_1035955_100_SI_LVK_48_SE.fq.gz_flye_contig_13	40462	41143	+	IncFIB(AP001918)_1	1-682/682	===============	0/0	100	97.65	plasmidfinder	AP001918	IncFIB(AP001918)_1__AP001918
DTU_2024_1035955_100_SI_LVK_48_SE.fq.gz_flye.fasta		DTU_2024_1035955_100_SI_LVK_48_SE.fq.gz_flye_contig_11	156239	156380	-	IncI1_1_Alpha	1-142/142	===============	0/0	100	100	plasmidfinder	AP005147	IncI1_1_Alpha_AP005147
DTU_2024_1035955_100_SI_LVK_48_SE.fq.gz_flye.fasta		DTU_2024_1035955_100_SI_LVK_48_SE.fq.gz_flye_contig_26	6202	6589	-	IncFIA(HI1)_1_HI1	1-386/388	========/======	2025-02-01	99.48	94.33	plasmidfinder	AF250878	IncFIA(HI1)_1_HI1_AF250878
DTU_2024_1035955_100_SI_LVK_48_SE.fq.gz_flye.fasta		DTU_2024_1035955_100_SI_LVK_48_SE.fq.gz_flye_contig_30	37065	37388	+	IncI2_1	1-324/324	===============	0/0	100	99.38	plasmidfinder	KP347127	IncI2_1__KP347127
DTU_2024_1035954_100_SI_LVK_43_SE.fq.gz_flye.fasta	ETEC	DTU_2024_1035954_100_SI_LVK_43_SE.fq.gz_flye_contig_11	71614	72295	+	IncFIB(AP001918)_1	1-682/682	===============	0/0	100	99.27	plasmidfinder	AP001918	IncFIB(AP001918)_1__AP001918
DTU_2024_1035954_100_SI_LVK_43_SE.fq.gz_flye.fasta	ETEC	DTU_2024_1035954_100_SI_LVK_43_SE.fq.gz_flye_contig_5	45060	45356	+	IncFIC(FII)_1	1-299/499	========/=.....	2025-06-04	59.12	93.36	plasmidfinder	AP001918	IncFIC(FII)_1__AP001918
DTU_2024_1035954_100_SI_LVK_43_SE.fq.gz_flye.fasta		DTU_2024_1035954_100_SI_LVK_43_SE.fq.gz_flye_contig_10	53064	53828	-	IncY_1	1-765/765	===============	0/0	100	98.95	plasmidfinder	K02380	IncY_1__K02380
DTU_2024_1035954_100_SI_LVK_43_SE.fq.gz_flye.fasta		DTU_2024_1035954_100_SI_LVK_43_SE.fq.gz_flye_contig_11	121448	121589	-	IncI1_1_Alpha	1-142/142	===============	0/0	100	100	plasmidfinder	AP005147	IncI1_1_Alpha_AP005147
DTU_2024_1035954_100_SI_LVK_43_SE.fq.gz_flye.fasta		DTU_2024_1035954_100_SI_LVK_43_SE.fq.gz_flye_contig_12	39027	39400	-	IncX4_1	1-374/374	===============	0/0	100	100	plasmidfinder	CP002895	IncX4_1__CP002895
DTU_2024_1035954_100_SI_LVK_43_SE.fq.gz_flye.fasta		DTU_2024_1035954_100_SI_LVK_43_SE.fq.gz_flye_contig_2	146768	147397	-	IncHI2A_1	1-630/630	===============	0/0	100	99.52	plasmidfinder	BX664015	IncHI2A_1__BX664015
DTU_2024_1035954_100_SI_LVK_43_SE.fq.gz_flye.fasta		DTU_2024_1035954_100_SI_LVK_43_SE.fq.gz_flye_contig_2	164683	165009	+	IncHI2_1	1-327/327	===============	0/0	100	100	plasmidfinder	BX664015	IncHI2_1__BX664015
DTU_2024_1035954_100_SI_LVK_43_SE.fq.gz_flye.fasta		DTU_2024_1035954_100_SI_LVK_43_SE.fq.gz_flye_contig_5	26345	26718	+	IncX1_1	1-374/374	===============	0/0	100	98.66	plasmidfinder	EU370913	IncX1_1__EU370913
DTU_2024_1035952_100_SI_LVK_11_SE.fq.gz_flye.fasta	ETEC	DTU_2024_1035952_100_SI_LVK_11_SE.fq.gz_flye_contig_11	4415	4711	-	IncFIC(FII)_1	1-299/499	========/=.....	2025-06-04	59.12	93.36	plasmidfinder	AP001918	IncFIC(FII)_1__AP001918
DTU_2024_1035952_100_SI_LVK_11_SE.fq.gz_flye.fasta		DTU_2024_1035952_100_SI_LVK_11_SE.fq.gz_flye_contig_11	49442	49815	-	IncX1_1	1-374/374	===============	0/0	100	98.66	plasmidfinder	EU370913	IncX1_1__EU370913
DTU_2024_1035952_100_SI_LVK_11_SE.fq.gz_flye.fasta		DTU_2024_1035952_100_SI_LVK_11_SE.fq.gz_flye_contig_15	588582	588955	+	IncX4_1	1-374/374	===============	0/0	100	100	plasmidfinder	CP002895	IncX4_1__CP002895
DTU_2024_1035952_100_SI_LVK_11_SE.fq.gz_flye.fasta		DTU_2024_1035952_100_SI_LVK_11_SE.fq.gz_flye_contig_18	21027	21400	-	IncX4_1	1-374/374	===============	0/0	100	100	plasmidfinder	CP002895	IncX4_1__CP002895
DTU_2024_1035952_100_SI_LVK_11_SE.fq.gz_flye.fasta		DTU_2024_1035952_100_SI_LVK_11_SE.fq.gz_flye_contig_24	14335	14476	-	IncI1_1_Alpha	1-142/142	===============	0/0	100	100	plasmidfinder	AP005147	IncI1_1_Alpha_AP005147
DTU_2024_1035952_100_SI_LVK_11_SE.fq.gz_flye.fasta		DTU_2024_1035952_100_SI_LVK_11_SE.fq.gz_flye_contig_36	39606	39927	+	IncI2_1_Delta	1-316/316	========/======	2025-06-01	100	97.52	plasmidfinder	AP002527	IncI2_1_Delta_AP002527
DTU_2024_1035952_100_SI_LVK_11_SE.fq.gz_flye.fasta		DTU_2024_1035952_100_SI_LVK_11_SE.fq.gz_flye_contig_9	16654	16914	+	IncFII_1	1-261/261	===============	0/0	100	100	plasmidfinder	AY458016	IncFII_1__AY458016
DTU_2014_1035953_100_SI_LVK_17_SE.fq.gz_flye.fasta	ETEC	DTU_2014_1035953_100_SI_LVK_17_SE.fq.gz_flye_contig_20	810	1308	-	IncFIC(FII)_1	1-499/499	===============	0/0	100	98.6	plasmidfinder	AP001918	IncFIC(FII)_1__AP001918
DTU_2014_1035953_100_SI_LVK_17_SE.fq.gz_flye.fasta	ETEC	DTU_2014_1035953_100_SI_LVK_17_SE.fq.gz_flye_contig_5	37368	38049	-	IncFIB(AP001918)_1	1-682/682	===============	0/0	100	96.63	plasmidfinder	AP001918	IncFIB(AP001918)_1__AP001918
DTU_2014_1035953_100_SI_LVK_17_SE.fq.gz_flye.fasta	ETEC	DTU_2014_1035953_100_SI_LVK_17_SE.fq.gz_flye_contig_5	80483	80981	-	IncFIC(FII)_1	1-499/499	===============	0/0	100	98.6	plasmidfinder	AP001918	IncFIC(FII)_1__AP001918
DTU_2014_1035953_100_SI_LVK_17_SE.fq.gz_flye.fasta		DTU_2014_1035953_100_SI_LVK_17_SE.fq.gz_flye_contig_15	105908	106044	+	IncI_Gamma_1	5-141/141	===============	0/0	97.16	100	plasmidfinder	AP011954	IncI_Gamma_1_AP011954
DTU_2014_1035953_100_SI_LVK_17_SE.fq.gz_flye.fasta		DTU_2014_1035953_100_SI_LVK_17_SE.fq.gz_flye_contig_26	22079	22784	-	pEC4115_1	1-706/706	===============	0/0	100	99.43	plasmidfinder	NC_011351	pEC4115_1__NC_011351
DTU_2014_1035953_100_SI_LVK_17_SE.fq.gz_flye.fasta		DTU_2014_1035953_100_SI_LVK_17_SE.fq.gz_flye_contig_28	3888	3997	-	Col440I_1	1-110/114	===============	0/0	96.49	90	plasmidfinder	CP023920.1	Col440I_1__CP023920.1
DTU_2014_1035953_100_SI_LVK_17_SE.fq.gz_flye.fasta		DTU_2014_1035953_100_SI_LVK_17_SE.fq.gz_flye_contig_28	7597	7714	-	ColRNAI_1	1-118/130	==============.	0/0	90.77	92.37	plasmidfinder	DQ298019	ColRNAI_1__DQ298019
